# Supplementary material
Source: ML conference proceedings conference paper supplement (https://aclanthology.org/2023.findings-eacl.31)
Supplement: dataset [file 2023.findings-eacl.31.dataset.zip]

# Error Analysis on Event and Step

In general, events can be divided into two groups:

1. Those that can be answered using information solely from the specific step

```
Instruction: Heat the pan.  
Event: I touch the pan without getting burned
```

2. Those that can be answered using information from current and previous steps

```
Instruction: Give dog a treat  
Event: I can walk the dog  
  
Demand previous info: the dog is clean and dry
```

Result:

We name group1 event\_single and group2 event\_multi,

F1 (event\_single) = 0.49

Acc (event\_single) = 0.83

Count = 574 events

F1(event\_multi) = 0.46

Acc (event\_multi) = 0.85

Count = 98 events

Another way of dividing events is by the mention of Entity-of-Interest (EoI). EoI refers to the entity that has strict causal relationship with the event. For instance, the entity pan

has causal relationship with the event `I touch the pan without getting burned` because `hot pan` will cause the event to be unlikely.

Result:

F1 (Eol mentioned) = 0.49

Acc(Eol mentioned) = 0.83

Count = 561 events

F1 (Eol NOT mentioned) = 0.46

Acc (Eol NOT mentioned) = 0.85

Count = 111 events

574

98

561

111
