# Supplementary material
Source: ML conference proceedings conference paper supplement (https://aclanthology.org/2023.findings-eacl.31)

# Event Prediction

## Coverage Probability (Binary): 0.80

For steps where there exist some event, the probability that Codex will generate one or more predicted events

## Coverage Probability (Exact): 0.74

For steps where there exist  $n$  events, the probability that Codex will generate exactly  $n$  responses.

## Steps with Single VS Multiple Event Changes

For steps with single event change, the F1 Score is 0.44

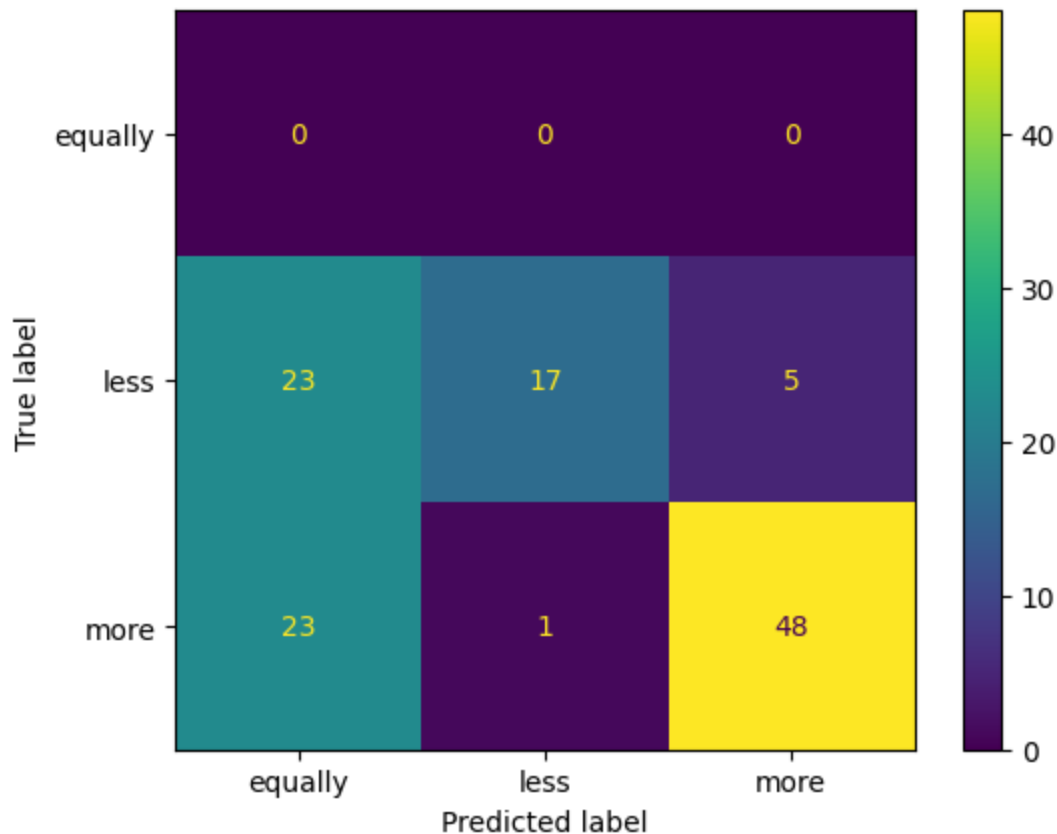

For steps with multiple event changes, the F1 Score is 0.28

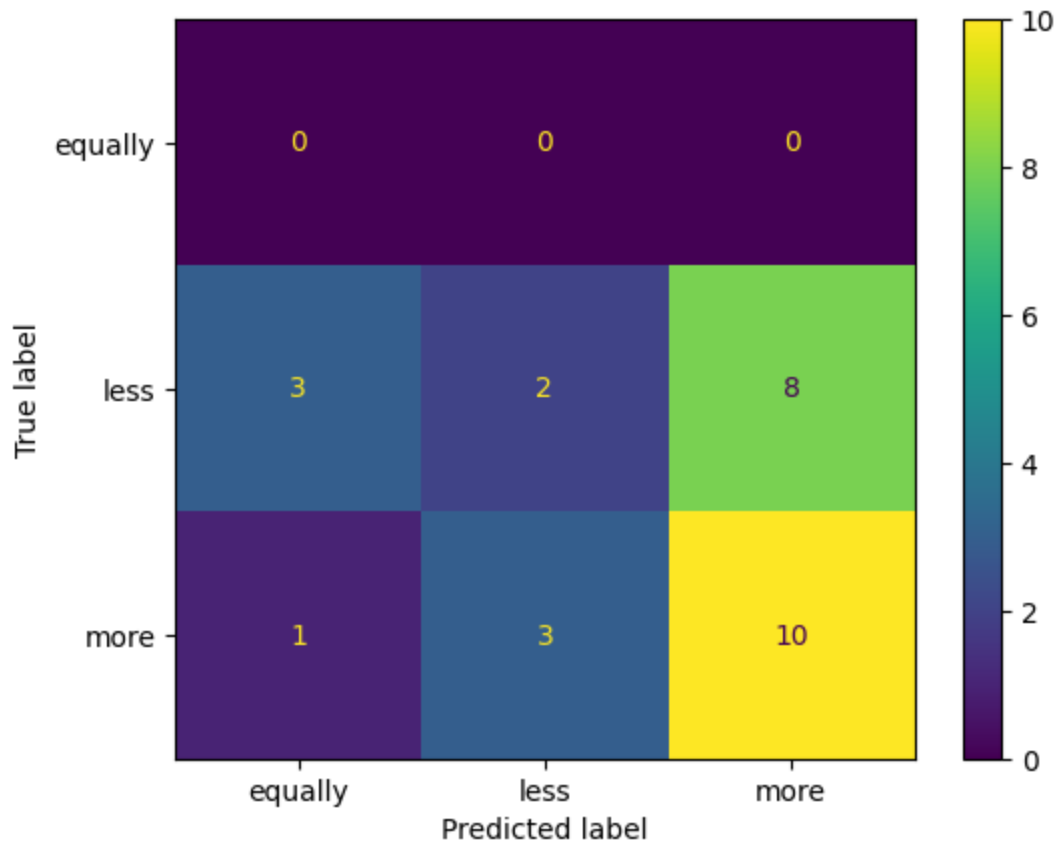

Supplement: dataset [file 2023.findings-eacl.31.dataset.zip]
