# Supplementary material
Source: ML conference proceedings conference paper supplement (https://aclanthology.org/2023.findings-eacl.31)
Supplement: dataset [file 2023.findings-eacl.31.dataset.zip]

Archive with 342 entries (253 files):
- causal_reasoning_of_entities_and_events/
- causal_reasoning_of_entities_and_events/.DS_Store
- causal_reasoning_of_entities_and_events/.git/
- causal_reasoning_of_entities_and_events/.git/COMMIT_EDITMSG
- causal_reasoning_of_entities_and_events/.git/config
- causal_reasoning_of_entities_and_events/.git/description
- causal_reasoning_of_entities_and_events/.git/FETCH_HEAD
- causal_reasoning_of_entities_and_events/.git/HEAD
- causal_reasoning_of_entities_and_events/.git/hooks/
- causal_reasoning_of_entities_and_events/.git/hooks/applypatch-msg.sample
- causal_reasoning_of_entities_and_events/.git/hooks/commit-msg.sample
- causal_reasoning_of_entities_and_events/.git/hooks/fsmonitor-watchman.sample
- causal_reasoning_of_entities_and_events/.git/hooks/post-update.sample
- causal_reasoning_of_entities_and_events/.git/hooks/pre-applypatch.sample
- causal_reasoning_of_entities_and_events/.git/hooks/pre-commit.sample
- causal_reasoning_of_entities_and_events/.git/hooks/pre-merge-commit.sample
- causal_reasoning_of_entities_and_events/.git/hooks/pre-push.sample
- causal_reasoning_of_entities_and_events/.git/hooks/pre-rebase.sample
- causal_reasoning_of_entities_and_events/.git/hooks/pre-receive.sample
- causal_reasoning_of_entities_and_events/.git/hooks/prepare-commit-msg.sample
- causal_reasoning_of_entities_and_events/.git/hooks/push-to-checkout.sample
- causal_reasoning_of_entities_and_events/.git/hooks/update.sample
- causal_reasoning_of_entities_and_events/.git/index
- causal_reasoning_of_entities_and_events/.git/info/
- causal_reasoning_of_entities_and_events/.git/info/exclude
- causal_reasoning_of_entities_and_events/.git/logs/
- causal_reasoning_of_entities_and_events/.git/logs/HEAD
- causal_reasoning_of_entities_and_events/.git/logs/refs/
- causal_reasoning_of_entities_and_events/.git/logs/refs/heads/
- causal_reasoning_of_entities_and_events/.git/logs/refs/heads/main
- causal_reasoning_of_entities_and_events/.git/logs/refs/remotes/
- causal_reasoning_of_entities_and_events/.git/logs/refs/remotes/origin/
- causal_reasoning_of_entities_and_events/.git/logs/refs/remotes/origin/HEAD
- causal_reasoning_of_entities_and_events/.git/logs/refs/remotes/origin/main
- causal_reasoning_of_entities_and_events/.git/objects/
- causal_reasoning_of_entities_and_events/.git/objects/03/
- causal_reasoning_of_entities_and_events/.git/objects/03/c7a890c6b6d50af28219c73b64a964e6ed08e2
- causal_reasoning_of_entities_and_events/.git/objects/30/
- causal_reasoning_of_entities_and_events/.git/objects/30/5b4dc4de296df1c495996993531e52a5e6786b
- causal_reasoning_of_entities_and_events/.git/objects/31/
- causal_reasoning_of_entities_and_events/.git/objects/31/0db07cc3aa633663093ac74bee79667e91485f
- causal_reasoning_of_entities_and_events/.git/objects/41/
- causal_reasoning_of_entities_and_events/.git/objects/41/9e69e76433409aeea83e675928b57342983876
- causal_reasoning_of_entities_and_events/.git/objects/46/
- causal_reasoning_of_entities_and_events/.git/objects/46/f90157d644496c1db98c486e1765fd19ad3559
- causal_reasoning_of_entities_and_events/.git/objects/60/
- causal_reasoning_of_entities_and_events/.git/objects/60/aaed8879faa1e15d76fa2e734feb165ea9bf54
- causal_reasoning_of_entities_and_events/.git/objects/62/
- causal_reasoning_of_entities_and_events/.git/objects/62/645fbded547283705fef225be5ea5795072998
- causal_reasoning_of_entities_and_events/.git/objects/66/
- causal_reasoning_of_entities_and_events/.git/objects/66/5f8b341c7f957f48316a9c16b6632348210a00
- causal_reasoning_of_entities_and_events/.git/objects/87/
- causal_reasoning_of_entities_and_events/.git/objects/87/c3fb37afdc1ae9659b51befb3cc8afd0d6e066
- causal_reasoning_of_entities_and_events/.git/objects/8e/
- causal_reasoning_of_entities_and_events/.git/objects/8e/96de4702774e3940b883712e81d76b770825aa
- causal_reasoning_of_entities_and_events/.git/objects/90/
- causal_reasoning_of_entities_and_events/.git/objects/90/47e0c279fa18cd0b764048e8fd91c65d68c328
- causal_reasoning_of_entities_and_events/.git/objects/b3/
- causal_reasoning_of_entities_and_events/.git/objects/b3/925610cce2c3745eb73da46bc2a226d7d546c8
- causal_reasoning_of_entities_and_events/.git/objects/ce/
- causal_reasoning_of_entities_and_events/.git/objects/ce/8565aa54bd62bdebf85d601b801a3bc7ddcbc6
- causal_reasoning_of_entities_and_events/.git/objects/d3/
- causal_reasoning_of_entities_and_events/.git/objects/d3/68186bb3a61e5da694cdddb4d61b3f1a718748
- causal_reasoning_of_entities_and_events/.git/objects/d7/
- causal_reasoning_of_entities_and_events/.git/objects/d7/81adfc06b1e4f157ba39b0aaf5300b9ea6e04f
- causal_reasoning_of_entities_and_events/.git/objects/e9/
- causal_reasoning_of_entities_and_events/.git/objects/e9/483da11b71997b614106d95928cc0ee7fc77e6
- causal_reasoning_of_entities_and_events/.git/objects/f8/
- causal_reasoning_of_entities_and_events/.git/objects/f8/50e1d263f4bb996152945b92e4dd7a5d9c4038
- causal_reasoning_of_entities_and_events/.git/objects/info/
- causal_reasoning_of_entities_and_events/.git/objects/pack/
- causal_reasoning_of_entities_and_events/.git/objects/pack/pack-a20a9889657bb424f99b4b9c2bbfb1db2dc87dc4.idx
- causal_reasoning_of_entities_and_events/.git/objects/pack/pack-a20a9889657bb424f99b4b9c2bbfb1db2dc87dc4.pack
- causal_reasoning_of_entities_and_events/.git/packed-refs
- causal_reasoning_of_entities_and_events/.git/refs/
- causal_reasoning_of_entities_and_events/.git/refs/heads/
- causal_reasoning_of_entities_and_events/.git/refs/heads/main
- causal_reasoning_of_entities_and_events/.git/refs/remotes/
- causal_reasoning_of_entities_and_events/.git/refs/remotes/origin/
- causal_reasoning_of_entities_and_events/.git/refs/remotes/origin/HEAD
- causal_reasoning_of_entities_and_events/.git/refs/remotes/origin/main
- causal_reasoning_of_entities_and_events/.git/refs/tags/
- causal_reasoning_of_entities_and_events/codex/
- causal_reasoning_of_entities_and_events/codex/.DS_Store
- causal_reasoning_of_entities_and_events/codex/README.md
- causal_reasoning_of_entities_and_events/codex/trials/
- causal_reasoning_of_entities_and_events/codex/trials/hainiu1.0/
- causal_reasoning_of_entities_and_events/codex/trials/hainiu1.0/.DS_Store
- causal_reasoning_of_entities_and_events/codex/trials/hainiu1.1/
- causal_reasoning_of_entities_and_events/codex/trials/hainiu1.1/.DS_Store
- causal_reasoning_of_entities_and_events/codex/v1.2/
- causal_reasoning_of_entities_and_events/codex/v1.2/data_dev_out_entity_and_event.json
- causal_reasoning_of_entities_and_events/codex/v1.2/data_dev_out_entity_and_event_atonce.json
- causal_reasoning_of_entities_and_events/codex/v1.2/data_dev_out_entity_and_event_atonce.tsv
- causal_reasoning_of_entities_and_events/codex/v1.2/data_dev_out_entity_and_event_atonce_annotated.tsv
- causal_reasoning_of_entities_and_events/codex/v1.2/data_dev_out_entity_and_event_atonce_confusion_matrix.png
- causal_reasoning_of_entities_and_events/codex/v1.2/data_dev_out_entity_and_event_confusion_matrix.png
- causal_reasoning_of_entities_and_events/codex/v1.2/data_dev_out_entity_and_event_gold.json
- causal_reasoning_of_entities_and_events/codex/v1.2/data_dev_out_entity_and_event_gold_confusion_matrix.png
- causal_reasoning_of_entities_and_events/codex/v1.2/data_dev_out_event_only.json
- causal_reasoning_of_entities_and_events/codex/v1.2/data_dev_out_event_only_atonce.json
- causal_reasoning_of_entities_and_events/codex/v1.2/data_dev_out_event_only_atonce_confusion_matrix.png
- causal_reasoning_of_entities_and_events/codex/v1.2/data_dev_out_event_only_confusion_matrix.png
- causal_reasoning_of_entities_and_events/codex/v1.2/data_test_out_entity_and_event_atonce.json
- causal_reasoning_of_entities_and_events/codex/v1.2/data_test_out_entity_and_event_atonce_confusion_matrix.png
- causal_reasoning_of_entities_and_events/codex/v1.2/data_test_out_entity_and_event_gold.json
- causal_reasoning_of_entities_and_events/codex/v1.2/data_test_out_entity_and_event_gold_confusion_matrix.png
- causal_reasoning_of_entities_and_events/codex/v1.2/data_test_out_event_only_atonce.json
- causal_reasoning_of_entities_and_events/codex/v1.2/data_test_out_event_only_atonce_confusion_matrix.png
- causal_reasoning_of_entities_and_events/codex/v1.2/openai_models.py
- causal_reasoning_of_entities_and_events/codex/v1.2/prompts/
- causal_reasoning_of_entities_and_events/codex/v1.2/prompts/1hop_0hop.py
- causal_reasoning_of_entities_and_events/codex/v1.2/prompts/1hop_only.py
- causal_reasoning_of_entities_and_events/codex/v1.2/README.md
- causal_reasoning_of_entities_and_events/codex/v1.2.1/
- causal_reasoning_of_entities_and_events/codex/v1.2.1/data_dev_out_event_only_atonce.json
- causal_reasoning_of_entities_and_events/codex/v1.2.1/data_dev_out_event_only_atonce_confusion_matrix.png
- causal_reasoning_of_entities_and_events/codex/v1.2.1/data_test_out_event_only_atonce.json
- causal_reasoning_of_entities_and_events/codex/v1.2.1/data_test_out_event_only_atonce_confusion_matrix.png
- causal_reasoning_of_entities_and_events/codex/v1.2.1/openai_models.py
- causal_reasoning_of_entities_and_events/codex/v1.2.1/prompts/
- causal_reasoning_of_entities_and_events/codex/v1.2.1/prompts/1hop_only.py
- causal_reasoning_of_entities_and_events/codex/v1.2.1/README.md
- causal_reasoning_of_entities_and_events/codex/v1.2.2/
- causal_reasoning_of_entities_and_events/codex/v1.2.2/data_dev_out_event_only_atonce.json
- causal_reasoning_of_entities_and_events/codex/v1.2.2/data_dev_out_event_only_atonce_confusion_matrix.png
- causal_reasoning_of_entities_and_events/codex/v1.2.2/data_test_out_event_only_atonce.json
- causal_reasoning_of_entities_and_events/codex/v1.2.2/data_test_out_event_only_atonce_confusion_matrix.png
- causal_reasoning_of_entities_and_events/codex/v1.2.2/openai_models.py
- causal_reasoning_of_entities_and_events/codex/v1.2.2/prompts/
- causal_reasoning_of_entities_and_events/codex/v1.2.2/prompts/1hop_only.py
- causal_reasoning_of_entities_and_events/codex/v1.2.2/README.md
- causal_reasoning_of_entities_and_events/codex/v1.2.3/
- causal_reasoning_of_entities_and_events/codex/v1.2.3/data_dev_out_entity_and_event.json
- causal_reasoning_of_entities_and_events/codex/v1.2.3/data_dev_out_entity_and_event_atonce.json
- causal_reasoning_of_entities_and_events/codex/v1.2.3/data_dev_out_entity_and_event_atonce_confusion_matrix.png
- causal_reasoning_of_entities_and_events/codex/v1.2.3/data_dev_out_event_only.json
- causal_reasoning_of_entities_and_events/codex/v1.2.3/data_dev_out_gold_entity_and_event.json
- causal_reasoning_of_entities_and_events/codex/v1.2.3/openai_models.py
- causal_reasoning_of_entities_and_events/codex/v1.2.3/prompts/
- causal_reasoning_of_entities_and_events/codex/v1.2.3/prompts/1hop_0hop.py
- causal_reasoning_of_entities_and_events/codex/v1.2.3/README.md
- causal_reasoning_of_entities_and_events/codex/v1.2.3/test.py
- causal_reasoning_of_entities_and_events/codex/v1.2.4/
- causal_reasoning_of_entities_and_events/codex/v1.2.4/openai_models.py
- causal_reasoning_of_entities_and_events/codex/v1.2.4/prompts/
- causal_reasoning_of_entities_and_events/codex/v1.2.4/prompts/1hop_only.py
- causal_reasoning_of_entities_and_events/codex/v1.2.4/README.md
- causal_reasoning_of_entities_and_events/codex/v1.2.5/
- causal_reasoning_of_entities_and_events/codex/v1.2.5/data_dev_out_entity_and_event_atonce.json
- causal_reasoning_of_entities_and_events/codex/v1.2.5/data_dev_out_entity_and_event_atonce_confusion_matrix.png
- causal_reasoning_of_entities_and_events/codex/v1.2.5/data_dev_out_event_only_atonce.json
- causal_reasoning_of_entities_and_events/codex/v1.2.5/data_dev_out_event_only_atonce_confusion_matrix.png
- causal_reasoning_of_entities_and_events/codex/v1.2.5/data_test_out_entity_and_event_atonce.json
- causal_reasoning_of_entities_and_events/codex/v1.2.5/data_test_out_entity_and_event_atonce_confusion_matrix.png
- causal_reasoning_of_entities_and_events/codex/v1.2.5/data_test_out_event_only_atonce.json
- causal_reasoning_of_entities_and_events/codex/v1.2.5/data_test_out_event_only_atonce_confusion_matrix.png
- causal_reasoning_of_entities_and_events/codex/v1.2.5/openai_models.py
- causal_reasoning_of_entities_and_events/codex/v1.2.5/prompts/
- causal_reasoning_of_entities_and_events/codex/v1.2.5/prompts/1hop_0hop.py
- causal_reasoning_of_entities_and_events/codex/v1.2.5/README.md
- causal_reasoning_of_entities_and_events/codex/v1.2.6/
- causal_reasoning_of_entities_and_events/codex/v1.2.6/data_dev_v2_entity_and_event.json
- causal_reasoning_of_entities_and_events/codex/v1.2.6/data_dev_v2_entity_and_event_confusion_matrix.png
- causal_reasoning_of_entities_and_events/codex/v1.2.6/hainiu_v2/
- causal_reasoning_of_entities_and_events/codex/v1.2.6/hainiu_v2/0hop_1hop_hainiu_ver2_0.py
- causal_reasoning_of_entities_and_events/codex/v1.2.6/hainiu_v2/0hop_1hop_hainiu_ver2_1.py
- causal_reasoning_of_entities_and_events/codex/v1.2.6/hainiu_v2/0hop_1hop_hainiu_ver2_2.py
- causal_reasoning_of_entities_and_events/codex/v1.2.6/hainiu_v2/0hop_1hop_hainiu_ver2_3.py
- causal_reasoning_of_entities_and_events/codex/v1.2.6/hainiu_v2/0hop_1hop_hainiu_ver2_4.py
- causal_reasoning_of_entities_and_events/codex/v1.2.6/hainiu_v2/0hop_1hop_hainiu_ver2_5.py
- causal_reasoning_of_entities_and_events/codex/v1.2.6/hainiu_v2/1hop_only_hainiu_ver2_0.py
- causal_reasoning_of_entities_and_events/codex/v1.2.6/hainiu_v2/1hop_only_hainiu_ver2_1.py
- causal_reasoning_of_entities_and_events/codex/v1.2.6/hainiu_v2_experiments.py
- causal_reasoning_of_entities_and_events/codex/v1.2.6/openai_models.py
- causal_reasoning_of_entities_and_events/codex/v1.2.6/prompt/
- causal_reasoning_of_entities_and_events/codex/v1.2.6/prompt/0hop_1hop_hainiu_ver2_0.py
- causal_reasoning_of_entities_and_events/codex/v1.2.6/README.md
- causal_reasoning_of_entities_and_events/codex_error_analysis/
- causal_reasoning_of_entities_and_events/codex_error_analysis/.DS_Store
- causal_reasoning_of_entities_and_events/codex_error_analysis/.ipynb_checkpoints/
- causal_reasoning_of_entities_and_events/codex_error_analysis/.ipynb_checkpoints/label_entity-checkpoint.ipynb
- causal_reasoning_of_entities_and_events/codex_error_analysis/code/
- causal_reasoning_of_entities_and_events/codex_error_analysis/code/evaluate.py
- causal_reasoning_of_entities_and_events/codex_error_analysis/code/event_entity_error_analysis.py
- causal_reasoning_of_entities_and_events/codex_error_analysis/code/event_entity_inference_analysis.py
- causal_reasoning_of_entities_and_events/codex_error_analysis/code/event_entity_singular_analysis.py
- causal_reasoning_of_entities_and_events/codex_error_analysis/code/label_entity.py
- causal_reasoning_of_entities_and_events/codex_error_analysis/code/label_entity_event_inference.py
- causal_reasoning_of_entities_and_events/codex_error_analysis/code/length_of_procedure.py
- causal_reasoning_of_entities_and_events/codex_error_analysis/correlation between event and entity prediction.pdf
- causal_reasoning_of_entities_and_events/codex_error_analysis/data/
- causal_reasoning_of_entities_and_events/codex_error_analysis/data/data_dev_entity_event_inference_labeled_hainiu.json
- causal_reasoning_of_entities_and_events/codex_error_analysis/data/data_dev_out_entity_and_event.json
- causal_reasoning_of_entities_and_events/codex_error_analysis/data/data_dev_out_entity_labeled.json
- causal_reasoning_of_entities_and_events/codex_error_analysis/data/data_dev_out_entity_labeled_hainiu.json
- causal_reasoning_of_entities_and_events/codex_error_analysis/data/data_dev_out_entity_labeled_harry.json
- causal_reasoning_of_entities_and_events/codex_error_analysis/data/data_dev_v2_eoi.json
- causal_reasoning_of_entities_and_events/codex_error_analysis/EoI and number of steps needed to deduce event.pdf
- causal_reasoning_of_entities_and_events/codex_error_analysis/event_entity_analysis.pdf
- causal_reasoning_of_entities_and_events/codex_error_analysis/img/
- causal_reasoning_of_entities_and_events/codex_error_analysis/img/conf_multi.png
- causal_reasoning_of_entities_and_events/codex_error_analysis/img/conf_single.png
- causal_reasoning_of_entities_and_events/codex_error_analysis/img/event_wo_entity.png
- causal_reasoning_of_entities_and_events/codex_error_analysis/img/event_w_entity.png
- causal_reasoning_of_entities_and_events/codex_error_analysis/Length_of_Procedure_and_F1_Score.pdf
- causal_reasoning_of_entities_and_events/codex_error_analysis/README.md
- causal_reasoning_of_entities_and_events/data_dev_v2.json
- causal_reasoning_of_entities_and_events/data_test_v2.json
- causal_reasoning_of_entities_and_events/evaluate.py
- causal_reasoning_of_entities_and_events/gpt3/
- causal_reasoning_of_entities_and_events/gpt3/.DS_Store
- causal_reasoning_of_entities_and_events/gpt3/CoT/
- causal_reasoning_of_entities_and_events/gpt3/CoT/cot-prompts.txt
- causal_reasoning_of_entities_and_events/gpt3/CoT/cot.py
- causal_reasoning_of_entities_and_events/gpt3/CoT/eval.py
- causal_reasoning_of_entities_and_events/gpt3/CoT/optional-prompt.txt
- causal_reasoning_of_entities_and_events/gpt3/CoT/prompts.txt
- causal_reasoning_of_entities_and_events/gpt3/CoT/README.md
- causal_reasoning_of_entities_and_events/gpt3/legacy_trials/
- causal_reasoning_of_entities_and_events/gpt3/legacy_trials/harry1.0/
- causal_reasoning_of_entities_and_events/gpt3/legacy_trials/harry1.0/openai_models.py
- causal_reasoning_of_entities_and_events/gpt3/legacy_trials/harry1.0/prompts/
- causal_reasoning_of_entities_and_events/gpt3/legacy_trials/harry1.0/prompts/1hop_0hop.txt
- causal_reasoning_of_entities_and_events/gpt3/legacy_trials/harry1.0/prompts/1hop_only.txt
- causal_reasoning_of_entities_and_events/gpt3/legacy_trials/harry1.0/README.md
- causal_reasoning_of_entities_and_events/gpt3/legacy_trials/harry1.0/test.py
- causal_reasoning_of_entities_and_events/gpt3/legacy_trials/harry1.1/
- causal_reasoning_of_entities_and_events/gpt3/legacy_trials/harry1.1/openai_models.py
- causal_reasoning_of_entities_and_events/gpt3/legacy_trials/harry1.1/prompts/
- causal_reasoning_of_entities_and_events/gpt3/legacy_trials/harry1.1/prompts/1hop_0hop.txt
- causal_reasoning_of_entities_and_events/gpt3/legacy_trials/harry1.1/prompts/1hop_only.txt
- causal_reasoning_of_entities_and_events/gpt3/legacy_trials/harry1.1/README.md
- causal_reasoning_of_entities_and_events/gpt3/legacy_trials/harry1.1/test.py
- causal_reasoning_of_entities_and_events/gpt3/legacy_trials/weiqiu1.0/
- causal_reasoning_of_entities_and_events/gpt3/legacy_trials/weiqiu1.0/0hop-pred-test.json
- causal_reasoning_of_entities_and_events/gpt3/legacy_trials/weiqiu1.0/0hop-pred.json
- causal_reasoning_of_entities_and_events/gpt3/legacy_trials/weiqiu1.0/0hop-predictions-formatted.jsonl
- causal_reasoning_of_entities_and_events/gpt3/legacy_trials/weiqiu1.0/0hop-predictions-test-formatted.jsonl
- causal_reasoning_of_entities_and_events/gpt3/legacy_trials/weiqiu1.0/format_openpi_data_for_gpt3.py
- causal_reasoning_of_entities_and_events/gpt3/legacy_trials/weiqiu1.0/ft_gpt3_on_openpi_data.jsonl
- causal_reasoning_of_entities_and_events/gpt3/legacy_trials/weiqiu1.0/generate_openpi_answers_with_gpt3.py
- causal_reasoning_of_entities_and_events/gpt3/legacy_trials/weiqiu1.0/postprocessing.py
- causal_reasoning_of_entities_and_events/gpt3/legacy_trials/weiqiu1.0/prompts/
- causal_reasoning_of_entities_and_events/gpt3/legacy_trials/weiqiu1.0/prompts/1hop_0hop.txt
- causal_reasoning_of_entities_and_events/gpt3/legacy_trials/weiqiu1.0/prompts/ft_gpt3_1hop_0hop_openpi_entities.jsonl
- causal_reasoning_of_entities_and_events/gpt3/legacy_trials/weiqiu1.0/prompts/preprocessing.py
- causal_reasoning_of_entities_and_events/gpt3/legacy_trials/weiqiu1.0/README.md
- causal_reasoning_of_entities_and_events/gpt3/niket1/
- causal_reasoning_of_entities_and_events/gpt3/niket1/build_prompt.py
- causal_reasoning_of_entities_and_events/gpt3/niket1/fewshot_out.txt
- causal_reasoning_of_entities_and_events/gpt3/niket1/openai_models.py
- causal_reasoning_of_entities_and_events/gpt3/niket1/prompts/
- causal_reasoning_of_entities_and_events/gpt3/niket1/prompts/1hop_0hop.txt
- causal_reasoning_of_entities_and_events/gpt3/niket1/prompts/1hop_only.txt
- causal_reasoning_of_entities_and_events/gpt3/niket1/README.md
- causal_reasoning_of_entities_and_events/gpt3/niket1/zeroshot_out.txt
- causal_reasoning_of_entities_and_events/gpt3/plain_prompt/
- causal_reasoning_of_entities_and_events/gpt3/plain_prompt/eval.py
- causal_reasoning_of_entities_and_events/gpt3/plain_prompt/gpt3.py
- causal_reasoning_of_entities_and_events/gpt3/plain_prompt/prompts.txt
- causal_reasoning_of_entities_and_events/gpt3/plain_prompt/README.md
- causal_reasoning_of_entities_and_events/gpt3/README.md
- causal_reasoning_of_entities_and_events/gpt3/regular/
- causal_reasoning_of_entities_and_events/gpt3/self_ask/
- causal_reasoning_of_entities_and_events/gpt3/self_ask/full_pipeline/
- causal_reasoning_of_entities_and_events/gpt3/self_ask/full_pipeline/conf_mtx.png
- causal_reasoning_of_entities_and_events/gpt3/self_ask/full_pipeline/openai_models.py
- causal_reasoning_of_entities_and_events/gpt3/self_ask/full_pipeline/prompt/
- causal_reasoning_of_entities_and_events/gpt3/self_ask/full_pipeline/prompt/prompt.txt
- causal_reasoning_of_entities_and_events/gpt3/self_ask/full_pipeline/README.md
- causal_reasoning_of_entities_and_events/gpt3/self_ask/gold_entity/
- causal_reasoning_of_entities_and_events/gpt3/self_ask/gold_entity/conf_mtx.png
- causal_reasoning_of_entities_and_events/gpt3/self_ask/gold_entity/openai_models.py
- causal_reasoning_of_entities_and_events/gpt3/self_ask/gold_entity/prompt/
- causal_reasoning_of_entities_and_events/gpt3/self_ask/gold_entity/prompt/prompt.txt
- causal_reasoning_of_entities_and_events/gpt3/self_ask/gold_entity/README.md
- causal_reasoning_of_entities_and_events/gpt3/self_ask/no_CoT/
- causal_reasoning_of_entities_and_events/gpt3/self_ask/no_CoT/openai_models.py
- causal_reasoning_of_entities_and_events/gpt3/self_ask/no_CoT/prompt/
- causal_reasoning_of_entities_and_events/gpt3/self_ask/no_CoT/prompt/prompt.txt
- causal_reasoning_of_entities_and_events/gpt3/self_ask/no_CoT/README.md
- causal_reasoning_of_entities_and_events/gpt3/self_ask/README.md
- causal_reasoning_of_entities_and_events/gpt3.5/
- causal_reasoning_of_entities_and_events/gpt3.5/conf_mtx.png
- causal_reasoning_of_entities_and_events/gpt3.5/eval.py
- causal_reasoning_of_entities_and_events/gpt3.5/openai_models.py
- causal_reasoning_of_entities_and_events/gpt3.5/prompts.txt
- causal_reasoning_of_entities_and_events/gpt3.5/README.md
- causal_reasoning_of_entities_and_events/human_performance/
- causal_reasoning_of_entities_and_events/human_performance/dev_data_human_labeled.json
- causal_reasoning_of_entities_and_events/human_performance/human_baseline.py
- causal_reasoning_of_entities_and_events/LICENSE
- causal_reasoning_of_entities_and_events/naive/
- causal_reasoning_of_entities_and_events/naive/chance.py
- causal_reasoning_of_entities_and_events/naive/data_dev_out_chance.json
- causal_reasoning_of_entities_and_events/naive/data_dev_out_majority.json
- causal_reasoning_of_entities_and_events/naive/data_test_out_chance.json
- causal_reasoning_of_entities_and_events/naive/data_test_out_chance_confusion_matrix.png
- causal_reasoning_of_entities_and_events/naive/data_test_out_majority.json
[truncated: 42 more entries]
