# Supplementary material
Source: ML conference proceedings conference paper supplement (https://aclanthology.org/2023.findings-eacl.31)
Supplement: dataset [file 2023.findings-eacl.31.dataset.zip › causal_reasoning_of_entities_and_events/codex/v1.2.1/data_test_out_event_only_atonce.json]

{
    "1": {
        "goal": "Clean up kitchen counter",
        "annotator": "Hengyan Tao",
        "steps": [
            [
                {
                    "type": "step",
                    "step": "Start."
                }
            ],
            [
                {
                    "type": "step",
                    "step": "Wear rubber gloves."
                },
                {
                    "type": "entity",
                    "entity": "hands",
                    "attribute": "covered",
                    "change": "more likely"
                },
                {
                    "type": "event",
                    "event": "My skin makes contact with things I touch.",
                    "change": "less likely"
                }
            ],
            [
                {
                    "type": "step",
                    "step": "Get towels and wipes."
                }
            ],
            [
                {
                    "type": "step",
                    "step": "Use wipes to wipe kitchen counter."
                }
            ],
            [
                {
                    "type": "step",
                    "step": "Use towels to clean kitchen counter."
                }
            ],
            [
                {
                    "type": "step",
                    "step": "Store the gloves."
                },
                {
                    "type": "entity",
                    "entity": "hands",
                    "attribute": "covered",
                    "change": "less likely"
                },
                {
                    "type": "event",
                    "event": "My skin makes contact with things I touch.",
                    "change": "more likely"
                }
            ]
        ]
    },
    "4": {
        "goal": "Mow the lawn",
        "annotator": "Hengyan Tao",
        "steps": [
            [
                {
                    "type": "step",
                    "step": "Start."
                }
            ],
            [
                {
                    "type": "step",
                    "step": "Set up lawn mower."
                }
            ],
            [
                {
                    "type": "step",
                    "step": "Do the mowing."
                },
                {
                    "type": "entity",
                    "entity": "the lawn",
                    "attribute": "mowed",
                    "change": "more likely"
                },
                {
                    "type": "event",
                    "event": "A football is hidden from sight in the grass.",
                    "change": "less likely"
                }
            ],
            [
                {
                    "type": "step",
                    "step": "Finish Mowing."
                },
                {
                    "type": "predicted_event",
                    "event": "A football is hidden from sight in the grass.",
                    "change": "more likely"
                }
            ]
        ]
    },
    "7": {
        "goal": "Buy a flight ticket from SF to Hawaii",
        "annotator": "Hengyan Tao",
        "steps": [
            [
                {
                    "type": "step",
                    "step": "Start."
                }
            ],
            [
                {
                    "type": "step",
                    "step": "Open google flights and check the flights availability during the dates wanted."
                }
            ],
            [
                {
                    "type": "step",
                    "step": "Choose non-stop flights and check if the time slots work."
                }
            ],
            [
                {
                    "type": "step",
                    "step": "After deciding right time slots and price, proceed to buy tickets."
                }
            ],
            [
                {
                    "type": "step",
                    "step": "Got an email confirmation of reservation."
                },
                {
                    "type": "entity",
                    "entity": "the ticket",
                    "attribute": "purchased",
                    "change": "more likely"
                },
                {
                    "type": "event",
                    "event": "I can refund the ticket if it is refundable.",
                    "change": "more likely"
                }
            ]
        ]
    },
    "9": {
        "goal": "Boating in lake",
        "annotator": "Hengyan Tao",
        "steps": [
            [
                {
                    "type": "step",
                    "step": "Start."
                }
            ],
            [
                {
                    "type": "step",
                    "step": "Rent a boat."
                },
                {
                    "type": "predicted_event",
                    "event": "The boat floats around.",
                    "change": "more likely"
                }
            ],
            [
                {
                    "type": "step",
                    "step": "Find a lake which allows boating."
                }
            ],
            [
                {
                    "type": "step",
                    "step": "Drive to the lake and set the boat in lake."
                },
                {
                    "type": "entity",
                    "entity": "the boat",
                    "attribute": "in lake",
                    "change": "more likely"
                },
                {
                    "type": "event",
                    "event": "The boat floats around.",
                    "change": "more likely"
                }
            ],
            [
                {
                    "type": "step",
                    "step": "Enjoy the boating."
                }
            ],
            [
                {
                    "type": "step",
                    "step": "Return the boat."
                },
                {
                    "type": "entity",
                    "entity": "the boat",
                    "attribute": "in lake",
                    "change": "less likely"
                },
                {
                    "type": "event",
                    "event": "The boat floats around.",
                    "change": "less likely"
                },
                {
                    "type": "predicted_event",
                    "event": "The boat floats around.",
                    "change": "less likely"
                }
            ]
        ]
    },
    "10": {
        "goal": "Implement a code function",
        "annotator": "Hengyan Tao",
        "steps": [
            [
                {
                    "type": "step",
                    "step": "Start."
                }
            ],
            [
                {
                    "type": "step",
                    "step": "Decide what functionality the function needs to implement and the API."
                }
            ],
            [
                {
                    "type": "step",
                    "step": "Decide the input and output parameters of the function."
                }
            ],
            [
                {
                    "type": "step",
                    "step": "Implement the function."
                },
                {
                    "type": "entity",
                    "entity": "the function",
                    "attribute": "implemented",
                    "change": "more likely"
                },
                {
                    "type": "event",
                    "event": "Another process calls the function.",
                    "change": "more likely"
                },
                {
                    "type": "predicted_event",
                    "event": "Another process calls the function.",
                    "change": "more likely"
                }
            ],
            [
                {
                    "type": "step",
                    "step": "After implementation, do unit test, API test and system test."
                }
            ]
        ]
    },
    "11": {
        "goal": "Making a Virgin Strawberry Daiquiri",
        "annotator": "kuan wei",
        "steps": [
            [
                {
                    "type": "step",
                    "step": "Start."
                }
            ],
            [
                {
                    "type": "step",
                    "step": "Fill a blender with cracked ice."
                }
            ],
            [
                {
                    "type": "step",
                    "step": "Cut and slice 3 ounces (90 grams) of strawberries."
                }
            ],
            [
                {
                    "type": "step",
                    "step": "Add the strawberries to the blender, along with the sugar and lime juice."
                },
                {
                    "type": "predicted_event",
                    "event": "I drink the strawberries.",
                    "change": "more likely"
                }
            ],
            [
                {
                    "type": "step",
                    "step": "Blend until the mixture is smooth."
                },
                {
                    "type": "entity",
                    "entity": "the strawberries",
                    "attribute": "liquid",
                    "change": "more likely"
                },
                {
                    "type": "event",
                    "event": "I drink the strawberries.",
                    "change": "more likely"
                }
            ],
            [
                {
                    "type": "step",
                    "step": "Pour the mixture into a glass and garnish it with a strawberry."
                }
            ],
            [
                {
                    "type": "step",
                    "step": "Serve."
                }
            ]
        ]
    },
    "12": {
        "goal": "Making Matcha Green Tea the Traditional Way",
        "annotator": "kuan wei",
        "steps": [
            [
                {
                    "type": "step",
                    "step": "Start."
                }
            ],
            [
                {
                    "type": "step",
                    "step": "Boil 3/4 cup (180 ml) of water and pour it into your matcha bowl."
                },
                {
                    "type": "entity",
                    "entity": "bowl",
                    "attribute": "containing water",
                    "change": "more likely"
                },
                {
                    "type": "event",
                    "event": "The bowl is flipped and the table becomes wet.",
                    "change": "more likely"
                }
            ],
            [
                {
                    "type": "step",
                    "step": "Whisk the hot water with a chasen."
                }
            ],
            [
                {
                    "type": "step",
                    "step": "Discard the hot water from the bowl."
                },
                {
                    "type": "entity",
                    "entity": "bowl",
                    "attribute": "containing water",
                    "change": "more likely"
                },
                {
                    "type": "event",
                    "event": "The bowl is flipped and the table becomes wet.",
                    "change": "more likely"
                }
            ],
            [
                {
                    "type": "step",
                    "step": "Scoop 2 tsp (1.5 heaping teaspoons or 10 g) of matcha into a fine mesh strainer."
                }
            ],
            [
                {
                    "type": "step",
                    "step": "Sift the matcha into your empty, dry bowl."
                },
                {
                    "type": "predicted_event",
                    "event": "The bowl is flipped and the table becomes wet.",
                    "change": "more likely"
                },
                {
                    "type": "predicted_event",
                    "event": "I drink the matcha.",
                    "change": "more likely"
                }
            ],
            [
                {
                    "type": "step",
                    "step": "Pour boiling water into a teacup."
                }
            ],
            [
                {
                    "type": "step",
                    "step": "Add a small amount of hot water into the matcha bowl and whisk it."
                },
                {
                    "type": "entity",
                    "entity": "bowl",
                    "attribute": "containing water",
                    "change": "more likely"
                },
                {
                    "type": "event",
                    "event": "The bowl is flipped and the table becomes wet.",
                    "change": "more likely"
                },
                {
                    "type": "entity",
                    "entity": "the matcha",
                    "attribute": "powdered",
                    "change": "less likely"
                },
                {
                    "type": "event",
                    "event": "I drink the matcha.",
                    "change": "more likely"
                }
            ],
            [
                {
                    "type": "step",
                    "step": "Add the teacup water to the bowl until it's 1/3 full and continue whisking."
                }
            ],
            [
                {
                    "type": "step",
                    "step": "Clean your utensils."
                }
            ]
        ]
    },
    "17": {
        "goal": "Make Hot Cocoa",
        "annotator": "kuan wei",
        "steps": [
            [
                {
                    "type": "step",
                    "step": "Start."
                }
            ],
            [
                {
                    "type": "step",
                    "step": "Put the milk, sugar, and cocoa powder in a saucepan."
                }
            ],
            [
                {
                    "type": "step",
                    "step": "Simmer the hot cocoa over medium heat for about 8 to 10 minutes."
                }
            ],
            [
                {
                    "type": "step",
                    "step": "Stir in the vanilla and pour the cocoa into mugs."
                },
                {
                    "type": "entity",
                    "entity": "the cocoa",
                    "attribute": "in mugs",
                    "change": "more likely"
                },
                {
                    "type": "event",
                    "event": "I drink the cocoa from mugs.",
                    "change": "more likely"
                }
            ],
            [
                {
                    "type": "step",
                    "step": "Top the hot cocoa with marshmallows or whipped cream before serving."
                }
            ]
        ]
    },
    "22": {
        "goal": "Unclog a Toilet",
        "annotator": "Pujun Guan",
        "steps": [
            [
                {
                    "type": "step",
                    "step": "Start."
                }
            ],
            [
                {
                    "type": "step",
                    "step": "Insert the plunger into the toilet bowl."
                }
            ],
            [
                {
                    "type": "step",
                    "step": "Pump the plunger over the hole."
                }
            ],
            [
                {
                    "type": "step",
                    "step": "Flush the toilet to check the drainage."
                },
                {
                    "type": "entity",
                    "entity": "the toilet",
                    "attribute": "been clogged",
                    "change": "less likely"
                },
                {
                    "type": "event",
                    "event": "I use the toilet.",
                    "change": "more likely"
                }
            ]
        ]
    },
    "24": {
        "goal": "Revive a Dying Aloe Vera Plant",
        "annotator": "Pujun Guan",
        "steps": [
            [
                {
                    "type": "step",
                    "step": "Start."
                }
            ],
            [
                {
                    "type": "step",
                    "step": "Examine the leaves."
                },
                {
                    "type": "predicted_event",
                    "event": "The soil is soft.",
                    "change": "more likely"
                }
            ],
            [
                {
                    "type": "step",
                    "step": "Check the soil moisture."
                }
            ],
            [
                {
                    "type": "step",
                    "step": "Water until the soil is just moist."
                },
                {
                    "type": "entity",
                    "entity": "soil",
                    "attribute": "moist",
                    "change": "more likely"
                },
                {
                    "type": "event",
                    "event": "The soil is soft.",
                    "change": "more likely"
                }
            ],
            [
                {
                    "type": "step",
                    "step": "Water the plant weekly or bi-weekly "
                }
            ]
        ]
    },
    "25": {
        "goal": "Clean White Shoes",
        "annotator": "Pujun Guan",
        "steps": [
            [
                {
                    "type": "step",
                    "step": "Start."
                }
            ],
            [
                {
                    "type": "step",
                    "step": "Mix dish soap into warm water."
                },
                {
                    "type": "predicted_event",
                    "event": "I wear the shoes.",
                    "change": "less likely"
                }
            ],
            [
                {
                    "type": "step",
                    "step": "Clean the soles and rubber pieces with a magic eraser."
                },
                {
                    "type": "entity",
                    "entity": "the shoes",
                    "attribute": "wet",
                    "change": "more likely"
                },
                {
                    "type": "event",
                    "event": "I wear the shoes.",
                    "change": "less likely"
                },
                {
                    "type": "predicted_event",
                    "event": "I wear the shoes.",
                    "change": "less likely"
                }
            ],
            [
                {
                    "type": "step",
                    "step": "Scrub stains with a stiff-bristled toothbrush."
                },
                {
                    "type": "entity",
                    "entity": "the shoes",
                    "attribute": "dirty",
                    "change": "less likely"
                },
                {
                    "type": "predicted_event",
                    "event": "I wear the shoes.",
                    "change": "more likely"
                }
            ],
            [
                {
                    "type": "step",
                    "step": "Let your shoes air dry. "
                },
                {
                    "type": "entity",
                    "entity": "the shoes",
                    "attribute": "wet",
                    "change": "less likely"
                },
                {
                    "type": "event",
                    "event": "I wear the shoes.",
                    "change": "more likely"
                }
            ]
        ]
    },
    "29": {
        "goal": "Cook BBQ Ribs",
        "annotator": "Pujun Guan",
        "steps": [
            [
                {
                    "type": "step",
                    "step": "Start."
                }
            ],
            [
                {
                    "type": "step",
                    "step": "Choose which cut of ribs you want."
                }
            ],
            [
                {
                    "type": "step",
                    "step": "Make the rub."
                },
                {
                    "type": "predicted_event",
                    "event": "I can eat the ribs.",
                    "change": "more likely"
                }
            ],
            [
                {
                    "type": "step",
                    "step": "Make the mop (optional)."
                },
                {
                    "type": "predicted_event",
                    "event": "I can eat the ribs.",
                    "change": "more likely"
                }
            ],
            [
                {
                    "type": "step",
                    "step": "Trim the ribs and apply the rub."
                },
                {
                    "type": "entity",
                    "entity": "the ribs",
                    "attribute": "seasoned",
                    "change": "more likely"
                },
                {
                    "type": "event",
                    "event": "If I touch the ribs, I get powders on my hand.",
                    "change": "more likely"
                },
                {
                    "type": "predicted_event",
                    "event": "I can eat the ribs.",
                    "change": "more likely"
                }
            ],
            [
                {
                    "type": "step",
                    "step": "For spare ribs, place the ribs on a covered barbecue grill at 225F (107C) for 5-6 hours."
                },
                {
                    "type": "entity",
                    "entity": "the ribs",
                    "attribute": "raw",
                    "change": "less likely"
                },
                {
                    "type": "event",
                    "event": "I can eat the ribs.",
                    "change": "more likely"
                },
                {
                    "type": "event",
                    "event": "If I touch the ribs, I get powders on my hand.",
                    "change": "less likely"
                },
                {
                    "type": "predicted_event",
                    "event": "I can eat the ribs.",
                    "change": "more likely"
                }
            ]
        ]
    },
    "30": {
        "goal": "Make Kraft Macaroni and Cheese",
        "annotator": "Pujun Guan",
        "steps": [
            [
                {
                    "type": "step",
                    "step": "Start."
                }
            ],
            [
                {
                    "type": "step",
                    "step": "Bring 6 cups (1.4 L) of water to a boil in a saucepan."
                }
            ],
            [
                {
                    "type": "step",
                    "step": "Cook the macaroni for 7-8 minutes."
                },
                {
                    "type": "entity",
                    "entity": "the macaroni",
                    "attribute": "hard",
                    "change": "less likely"
                },
                {
                    "type": "event",
                    "event": "The macaroni can be impaled by a fork.",
                    "change": "more likely"
                },
                {
                    "type": "predicted_event",
                    "event": "The macaroni can be impaled by a fork.",
                    "change": "more likely"
                }
            ],
            [
                {
                    "type": "step",
                    "step": "Drain the water from the macaroni."
                }
            ],
            [
                {
                    "type": "step",
                    "step": "Place the macaroni, margarine or butter, milk, and cheese sauce mix into the saucepan."
                },
                {
                    "type": "predicted_event",
                    "event": "The cheese is sticky.",
                    "change": "more likely"
                }
            ],
            [
                {
                    "type": "step",
                    "step": "Stir the ingredients to combine them."
                },
                {
                    "type": "entity",
                    "entity": "the cheese",
                    "attribute": "solid",
                    "change": "less likely"
                },
                {
                    "type": "event",
                    "event": "The cheese is sticky.",
                    "change": "more likely"
                }
            ],
            [
                {
                    "type": "step",
                    "step": "Serve the macaroni and cheese immediately or store it in the refrigerator."
                }
            ]
        ]
    },
    "31": {
        "goal": "Charge an iPhone",
        "annotator": "songqi li",
        "steps": [
            [
                {
                    "type": "step",
                    "step": "Start."
                }
            ],
            [
                {
                    "type": "step",
                    "step": "Make sure you have your iPhone's charger cable."
                },
                {
                    "type": "predicted_event",
                    "event": "The battery icon has a lightning icon.",
                    "change": "more likely"
                }
            ],
            [
                {
                    "type": "step",
                    "step": "Find a USB port."
                },
                {
                    "type": "predicted_event",
                    "event": "The battery icon has a lightning icon.",
                    "change": "less likely"
                }
            ],
            [
                {
                    "type": "step",
                    "step": "Plug your iPhone's cable into a powered USB port."
                }
            ],
            [
                {
                    "type": "step",
                    "step": "Attach the cable to your iPhone."
                },
                {
                    "type": "entity",
                    "entity": "the iPhone",
                    "attribute": "charging",
                    "change": "more likely"
                },
                {
                    "type": "event",
                    "event": "The battery icon has a lightning icon.",
                    "change": "more likely"
                }
            ]
        ]
    },
    "33": {
        "goal": "Open a Coconut",
        "annotator": "songqi li",
        "steps": [
            [
                {
                    "type": "step",
                    "step": "Start."
                }
            ],
            [
                {
                    "type": "step",
                    "step": "Preheat the oven."
                },
                {
                    "type": "entity",
                    "entity": "oven",
                    "attribute": "hot",
                    "change": "more likely"
                },
                {
                    "type": "event",
                    "event": "Things placed in the oven will be cooked.",
                    "change": "more likely"
                },
                {
                    "type": "predicted_event",
                    "event": "Things placed in the oven will be cooked.",
                    "change": "more likely"
                }
            ],
            [
                {
                    "type": "step",
                    "step": "Place the coconut on a pan and bake it for 10 minutes."
                }
            ],
            [
                {
                    "type": "step",
                    "step": "Remove the coconut and wrap it in a towel."
                }
            ],
            [
                {
                    "type": "step",
                    "step": "Place the coconut in a garbage bag and hit it against a hard surface."
                }
            ],
            [
                {
                    "type": "step",
                    "step": "Place a knife between the shell and meat to separate them."
                }
            ],
            [
                {
                    "type": "step",
                    "step": "Peel the fiber away from the coconut meat. "
                }
            ]
        ]
    },
    "35": {
        "goal": "Grow Grass",
        "annotator": "songqi li",
        "steps": [
            [
                {
                    "type": "step",
                    "step": "Start."
                }
            ],
            [
                {
                    "type": "step",
                    "step": "Choose grass seed that thrives in your region."
                },
                {
                    "type": "predicted_event",
                    "event": "The soil can easily be separated by hand.",
                    "change": "more likely"
                }
            ],
            [
                {
                    "type": "step",
                    "step": "Wait until the temperatures are moderate."
                }
            ],
            [
                {
                    "type": "step",
                    "step": "Test your soil's pH level."
                }
            ],
            [
                {
                    "type": "step",
                    "step": "Amend the soil's pH if necessary."
                }
            ],
            [
                {
                    "type": "step",
                    "step": "Loosen the soil if the ground is compacted."
                },
                {
                    "type": "entity",
                    "entity": "soil",
                    "attribute": "loosen",
                    "change": "more likely"
                },
                {
                    "type": "event",
                    "event": "The soil can easily be separated by hand.",
                    "change": "more likely"
                },
                {
                    "type": "predicted_event",
                    "event": "The soil can easily be separated by hand.",
                    "change": "less likely"
                }
            ],
            [
                {
                    "type": "step",
                    "step": "Grade the soil."
                }
            ],
            [
                {
                    "type": "step",
                    "step": "Spread the grass seed over the soil."
                }
            ],
            [
                {
                    "type": "step",
                    "step": "Spread fertilizer over the area."
                }
            ],
            [
                {
                    "type": "step",
                    "step": "Cover the grass seed with organic material."
                }
            ],
            [
                {
                    "type": "step",
                    "step": "Protect the newly-seeded lawn."
                }
            ],
            [
                {
                    "type": "step",
                    "step": "Wait to mow the new grass."
                }
            ]
        ]
    },
    "36": {
        "goal": "Germinate Tree Seeds",
        "annotator": "songqi li",
        "steps": [
            [
                {
                    "type": "step",
                    "step": "Start."
                }
            ],
            [
                {
                    "type": "step",
                    "step": "Add stones and natural compost to a plant pot."
                },
                {
                    "type": "predicted_event",
                    "event": "Seeds are growing.",
                    "change": "more likely"
                }
            ],
            [
                {
                    "type": "step",
                    "step": "Plant the seeds."
                },
                {
                    "type": "entity",
                    "entity": "seeds",
                    "attribute": "in soil",
                    "change": "more likely"
                },
                {
                    "type": "event",
                    "event": "The seeds can be seen in plain sight.",
                    "change": "less likely"
                }
            ],
            [
                {
                    "type": "step",
                    "step": "Put the pot in a shady spot."
                },
                {
                    "type": "event",
                    "event": "Seeds are growing.",
                    "change": "more likely"
                }
            ],
            [
                {
                    "type": "step",
                    "step": "Protect the seeds with wire mesh if your pot is outside."
                },
                {
                    "type": "predicted_event",
                    "event": "The seeds can be seen in plain sight.",
                    "change": "less likely"
                }
            ],
            [
                {
                    "type": "step",
                    "step": "Keep the soil damp."
                }
            ],
            [
                {
                    "type": "step",
                    "step": "Check the seeds for growth."
                }
            ]
        ]
    },
    "38": {
        "goal": "Snorkel in water",
        "annotator": "songqi li",
        "steps": [
            [
                {
                    "type": "step",
                    "step": "Start."
                }
            ],
            [
                {
                    "type": "step",
                    "step": "Get a snorkel and mask you feel comfortable with."
                }
            ],
            [
                {
                    "type": "step",
                    "step": "Put on the mask and tug the straps until it feels comfortably sealed around your eyes and nose."
                },
                {
                    "type": "entity",
                    "entity": "snorkel and mask",
                    "attribute": "put on",
                    "change": "more likely"
                },
                {
                    "type": "event",
                    "event": "Water gets in my eyes if I submerge myself in water.",
                    "change": "less likely"
                }
            ],
            [
                {
                    "type": "step",
                    "step": "Lay flat in the water on your stomach."
                }
            ],
            [
                {
                    "type": "step",
                    "step": "Bite gently down on the mouthpiece of the snorkel."
                },
                {
                    "type": "entity",
                    "entity": "mouthpiece",
                    "attribute": "bitten",
                    "change": "more likely"
                },
                {
                    "type": "event",
                    "event": "I can breathe through the snorkel tube.",
                    "change": "more likely"
                },
                {
                    "type": "predicted_event",
                    "event": "Water gets in my eyes if I submerge myself in water.",
                    "change": "more likely"
                }
            ],
            [
                {
                    "type": "step",
                    "step": "Take slow, regular breaths in and out through the tube."
                },
                {
                    "type": "predicted_event",
                    "event": "I can breathe through the snorkel tube.",
                    "change": "more likely"
                }
            ]
        ]
    },
    "41": {
        "goal": "Take a shower",
        "annotator": "na an",
        "steps": [
            [
                {
                    "step": "Start"
                }
            ],
            [
                {
                    "type": "step",
                    "step": "Take off the clothes"
                },
                {
                    "type": "predicted_event",
                    "event": "The sound of water can be heard.",
                    "change": "more likely"
                }
            ],
            [
                {
                    "type": "step",
                    "step": "Open the shower nozzle and wait for water to heat."
                },
                {
                    "type": "entity",
                    "entity": "water",
                    "attribute": "flowing",
                    "change": "more likely"
                },
                {
                    "type": "event",
                    "event": "The sound of water can be heard.",
                    "change": "more likely"
                },
                {
                    "type": "predicted_event",
                    "event": "I get on new and clean clothes.",
                    "change": "less likely"
                },
                {
                    "type": "predicted_event",
                    "event": "I get on new/clean clothes.",
                    "change": "less likely"
                }
            ],
            [
                {
                    "type": "step",
                    "step": "Walk into the shower"
                },
                {
                    "type": "entity",
                    "entity": "body",
                    "attribute": "dry",
                    "change": "less likely"
                },
                {
                    "type": "event",
                    "event": "I get on new and clean clothes.",
                    "change": "less likely"
                }
            ],
            [
                {
                    "type": "step",
                    "step": "Use Shampoo and Shower Wansher"
                },
                {
                    "type": "predicted_event",
                    "event": "The sound of water can be heard.",
                    "change": "less likely"
                }
            ],
            [
                {
                    "type": "step",
                    "step": "Rinse"
                },
                {
                    "type": "predicted_event",
                    "event": "I get on new and clean clothes.",
                    "change": "more likely"
                },
                {
                    "type": "predicted_event",
                    "event": "I get on new/clean clothes.",
                    "change": "more likely"
                }
            ],
            [
                {
                    "type": "step",
                    "step": "Close the shower nozzle"
                },
                {
                    "type": "entity",
                    "entity": "water",
                    "attribute": "flowing",
                    "change": "less likely"
                },
                {
                    "type": "event",
                    "event": "The sound of water can be heard.",
                    "change": "less likely"
                }
            ],
            [
                {
                    "type": "step",
                    "step": "Dry off body and hair"
                },
                {
                    "type": "entity",
                    "entity": "body",
                    "attribute": "dry",
                    "change": "more likely"
                },
                {
                    "type": "event",
                    "event": "I get on new/clean clothes.",
                    "change": "more likely"
                }
            ]
        ]
    },
    "42": {
        "goal": "Take a photo",
        "annotator": "na an",
        "steps": [
            [
                {
                    "step": "Start"
                }
            ],
            [
                {
                    "type": "step",
                    "step": "Turn on the camera"
                }
            ],
            [
                {
                    "type": "step",
                    "step": "Set up the camera parameter"
                }
            ],
            [
                {
                    "type": "step",
                    "step": "Press the shutter button"
                },
                {
                    "type": "entity",
                    "entity": "photo",
                    "attribute": "taken",
                    "change": "more likely"
                },
                {
                    "type": "event",
                    "event": "A file is added to the SD card.",
                    "change": "more likely"
                }
            ]
        ]
    },
    "45": {
        "goal": "Make paper airplane",
        "annotator": "na an",
        "steps": [
            [
                {
                    "step": "Start"
                }
            ],
            [
                {
                    "type": "step",
                    "step": "Get a paper"
                }
            ],
            [
                {
                    "type": "step",
                    "step": "Bring the top corners toward the center crease"
                },
                {
                    "type": "entity",
                    "entity": "paper",
                    "attribute": "square-shaped",
                    "change": "less likely"
                },
                {
                    "type": "event",
                    "event": "I use the paper for printing.",
                    "change": "less likely"
                }
            ],
            [
                {
                    "type": "step",
                    "step": "Hold your folds in place by folding the bottom point over them"
                }
            ],
            [
                {
                    "type": "step",
                    "step": "Fold the angled top edges toward the crease again"
                }
            ],
            [
                {
                    "type": "step",
                    "step": "Fold the paper along the centerline"
                }
            ],
            [
                {
                    "type": "step",
                    "step": "Crease the wings down so they line up on the bottom edge"
                },
                {
                    "type": "entity",
                    "entity": "paper airplane wing",
                    "attribute": "built",
                    "change": "more likely"
                },
                {
                    "type": "event",
                    "event": "The airplane can fly.",
                    "change": "more likely"
                }
            ]
        ]
    },
    "46": {
        "goal": "Download a movie",
        "annotator": "na an",
        "steps": [
            [
                {
                    "step": "Start"
                }
            ],
            [
                {
                    "type": "step",
                    "step": "Go to a free movie site in a web browser"
                }
            ],
            [
                {
                    "type": "step",
                    "step": "Search for a movie"
                }
            ],
            [
                {
                    "type": "step",
                    "step": "Check to see if it is available to download"
                }
            ],
            [
                {
                    "type": "step",
                    "step": "Select the movie quality and format"
                }
            ],
            [
                {
                    "type": "step",
                    "step": "Download the movie"
                },
                {
                    "type": "entity",
                    "entity": "movie",
                    "attribute": "on the local laptop",
                    "change": "more likely"
                },
                {
                    "type": "event",
                    "event": "I watch the movie without internet connection.",
                    "change": "more likely"
                }
            ]
        ]
    },
    "47": {
        "goal": "Endorse a check",
        "annotator": "na an",
        "steps": [
            [
                {
                    "step": "Start"
                }
            ],
            [
                {
                    "type": "step",
                    "step": "Verify the information on the check is correct"
                },
                {
                    "type": "predicted_event",
                    "event": "The check is ready to be deposited.",
                    "change": "more likely"
                }
            ],
            [
                {
                    "type": "step",
                    "step": "Determine who must endorse the check"
                },
                {
                    "type": "predicted_event",
                    "event": "The check is ready to be deposited.",
                    "change": "more likely"
                }
            ],
            [
                {
                    "type": "step",
                    "step": "Find the gray lines on the back of the check"
                },
                {
                    "type": "predicted_event",
                    "event": "The check is ready to be deposited.",
                    "change": "more likely"
                }
            ],
            [
                {
                    "type": "step",
                    "step": "Sign your name on one of the gray lines"
                },
                {
                    "type": "entity",
                    "entity": "check",
                    "attribute": "signed with name",
                    "change": "more likely"
                },
                {
                    "type": "event",
                    "event": "The check is ready to be deposited.",
                    "change": "more likely"
                },
                {
                    "type": "predicted_event",
                    "event": "I use the money from the check.",
                    "change": "less likely"
                }
            ],
            [
                {
                    "type": "step",
                    "step": "Deposit the check"
                },
                {
                    "type": "entity",
                    "entity": "check",
                    "attribute": "deposited",
                    "change": "more likely"
                },
                {
                    "type": "event",
                    "event": "I use the money from the check.",
                    "change": "more likely"
                }
            ]
        ]
    },
    "48": {
        "goal": "build a fire",
        "annotator": "na an",
        "steps": [
            [
                {
                    "step": "Start"
                }
            ],
            [
                {
                    "type": "step",
                    "step": "Get pre-cut firewood"
                },
                {
                    "type": "predicted_event",
                    "event": "I touch the firewood.",
                    "change": "more likely"
                }
            ],
            [
                {
                    "type": "step",
                    "step": "Get small, dry materials to use as tinder"
                }
            ],
            [
                {
                    "type": "step",
                    "step": "Choose a clear, dry surface to build fire"
                }
            ],
            [
                {
                    "type": "step",
                    "step": "Build a cross fire structure "
                }
            ],
            [
                {
                    "type": "step",
                    "step": "Use a lighter to light the fire"
                },
                {
                    "type": "entity",
                    "entity": "firewood",
                    "attribute": "hot",
                    "change": "more likely"
                },
                {
                    "type": "event",
                    "event": "I touch the firewood.",
                    "change": "less likely"
                },
                {
                    "type": "predicted_event",
                    "event": "I touch the firewood.",
                    "change": "less likely"
                }
            ]
        ]
    },
    "49": {
        "goal": "Bake a potato",
        "annotator": "na an",
        "steps": [
            [
                {
                    "step": "Start"
                }
            ],
            [
                {
                    "type": "step",
                    "step": "Choose the right type of potato"
                },
                {
                    "type": "predicted_event",
                    "event": "Smoke can be seen around the potato.",
                    "change": "less likely"
                }
            ],
            [
                {
                    "type": "step",
                    "step": "Wash the potato"
                }
            ],
            [
                {
                    "type": "step",
                    "step": "Season the potato with olive oil and black pepper"
                },
                {
                    "type": "entity",
                    "entity": "the potato",
                    "attribute": "oiled",
                    "change": "more likely"
                },
                {
                    "type": "event",
                    "event": "The patato is slippery and hard to pick up.",
                    "change": "more likely"
                },
                {
                    "type": "predicted_event",
                    "event": "The patato is slippery and hard to pick up.",
                    "change": "more likely"
                },
                {
                    "type": "predicted_event",
                    "event": "Smoke can be seen around the potato.",
                    "change": "more likely"
                }
            ],
            [
                {
                    "type": "step",
                    "step": "Put the potato on a microwavable plate"
                },
                {
                    "type": "predicted_event",
                    "event": "Smoke can be seen around the potato.",
                    "change": "less likely"
                }
            ],
            [
                {
                    "type": "step",
                    "step": "Put the plate in the microwave and choose a cook time"
                }
            ],
            [
                {
                    "type": "step",
                    "step": "Microwave the potato"
                },
                {
                    "type": "entity",
                    "entity": "potato",
                    "attribute": "hot",
                    "change": "more likely"
                },
                {
                    "type": "event",
                    "event": "Smoke can be seen around the potato.",
                    "change": "more likely"
                }
            ],
            [
                {
                    "type": "step",
                    "step": "Serve the potato"
                }
            ]
        ]
    },
    "51": {
        "goal": "Play your first game on the Playstation",
        "annotator": "christopher nguyen",
        "steps": [
            [
                {
                    "type": "step",
                    "step": "Start."
                }
            ],
            [
                {
                    "type": "step",
                    "step": "Buy a Playstation ."
                },
                {
                    "type": "predicted_event",
                    "event": "The Playstation cab be turned on and switched off.",
                    "change": "more likely"
                }
            ],
            [
                {
                    "type": "step",
                    "step": "Connect the Playstation to the TV."
                },
                {
                    "type": "predicted_event",
                    "event": "I hear a beep and see indicator lights.",
                    "change": "more likely"
                }
            ],
            [
                {
                    "type": "step",
                    "step": "Plug the Playstation to a electrical outlet."
                },
                {
                    "type": "entity",
                    "entity": "the Playstation",
                    "attribute": "powered",
                    "change": "more likely"
                },
                {
                    "type": "event",
                    "event": "The Playstation cab be turned on and switched off.",
                    "change": "more likely"
                },
                {
                    "type": "predicted_event",
                    "event": "I encounter a known bug on the system.",
                    "change": "more likely"
                }
            ],
            [
                {
                    "type": "step",
                    "step": "Push the Power button on the Playstation."
                },
                {
                    "type": "entity",
                    "entity": "the Playstation",
                    "attribute": "turned on",
                    "change": "more likely"
                },
                {
                    "type": "event",
                    "event": "I hear a beep and see indicator lights.",
                    "change": "more likely"
                },
                {
                    "type": "predicted_event",
                    "event": "I play a game online with friends.",
                    "change": "more likely"
                }
            ],
            [
                {
                    "type": "step",
                    "step": "Create a user profile."
                },
                {
                    "type": "predicted_event",
                    "event": "I hear a beep and see indicator lights.",
                    "change": "less likely"
                }
            ],
            [
                {
                    "type": "step",
                    "step": "Install any system software updates."
                },
                {
                    "type": "entity",
                    "entity": "the system",
                    "attribute": "updated",
                    "change": "more likely"
                },
                {
                    "type": "event",
                    "event": "I encounter a known bug on the system.",
                    "change": "less likely"
                }
            ],
            [
                {
                    "type": "step",
                    "step": "Install the game ."
                },
                {
                    "type": "entity",
                    "entity": "the game",
                    "attribute": "installed",
                    "change": "more likely"
                },
                {
                    "type": "event",
                    "event": "I play a game online with friends.",
                    "change": "more likely"
                }
            ]
        ]
    },
    "53": {
        "goal": "Turn on the radio in the car",
        "annotator": "christopher nguyen",
        "steps": [
            [
                {
                    "type": "step",
                    "step": "Start."
                }
            ],
            [
                {
                    "type": "step",
                    "step": "Unlock the car with the key."
                },
                {
                    "type": "predicted_event",
                    "event": "The car is driven.",
                    "change": "more likely"
                }
            ],
            [
                {
                    "type": "step",
                    "step": "Open the car door."
                }
            ],
            [
                {
                    "type": "step",
                    "step": "Sit in the car. "
                }
            ],
            [
                {
                    "type": "step",
                    "step": "Insert the key into the ignition slot."
                },
                {
                    "type": "predicted_event",
                    "event": "The car is driven.",
                    "change": "less likely"
                }
            ],
            [
                {
                    "type": "step",
                    "step": "Press the ignition button or turn the key."
                },
                {
                    "type": "entity",
                    "entity": "the engine",
                    "attribute": "on",
                    "change": "more likely"
                },
                {
                    "type": "event",
                    "event": "The car is driven.",
                    "change": "more likely"
                }
            ],
            [
                {
                    "type": "step",
                    "step": "Press the radio button."
                }
            ],
            [
                {
                    "type": "step",
                    "step": "Tune the frequency to the desired channel."
                }
            ]
        ]
    },
    "61": {
        "goal": "apply for graduate school",
        "annotator": "xiao dong",
        "steps": [
            [
                {
                    "type": "step",
                    "step": "Start."
                }
            ],
            [
                {
                    "type": "step",
                    "step": "Search for potential programs that fits my need"
                }
            ],
            [
                {
                    "type": "step",
                    "step": "Attend information session"
                }
            ],
            [
                {
                    "type": "step",
                    "step": "Taking all required standard tests"
                }
            ],
            [
                {
                    "type": "step",
                    "step": "Prepare personal statement"
                },
                {
                    "type": "predicted_event",
                    "event": "I submit the application.",
                    "change": "more likely"
                }
            ],
            [
                {
                    "type": "step",
                    "step": "Gather all other relevent material"
                },
                {
                    "type": "entity",
                    "entity": "application material",
                    "attribute": "prepared",
                    "change": "more likely"
                },
                {
                    "type": "event",
                    "event": "I submit the application.",
                    "change": "more likely"
                }
            ]
        ]
    },
    "62": {
        "goal": "Using a dishwasher to clean dishes",
        "annotator": "xiao dong",
        "steps": [
            [
                {
                    "type": "step",
                    "step": "Start."
                }
            ],
            [
                {
                    "type": "step",
                    "step": "Rinse the dishes with tap water"
                },
                {
                    "type": "entity",
                    "entity": "the dishes",
                    "attribute": "dry",
                    "change": "less likely"
                },
                {
                    "type": "event",
                    "event": "The dishes can be put away.",
                    "change": "less likely"
                }
            ],
            [
                {
                    "type": "step",
                    "step": "put the dishes into the dishwashers"
                }
            ],
            [
                {
                    "type": "step",
                    "step": "add detergent"
                },
                {
                    "type": "predicted_event",
                    "event": "The dishes can be put away.",
                    "change": "more likely"
                }
            ],
            [
                {
                    "type": "step",
                    "step": "start the dishwasher program"
                }
            ],
            [
                {
                    "type": "step",
                    "step": "take the dishes out"
                },
                {
                    "type": "entity",
                    "entity": "dishes",
                    "attribute": "clean",
                    "change": "more likely"
                },
                {
                    "type": "entity",
                    "entity": "the dishes",
                    "attribute": "dry",
                    "change": "more likely"
                },
                {
                    "type": "event",
                    "event": "The dishes can be put away.",
                    "change": "more likely"
                }
            ]
        ]
    },
    "64": {
        "goal": "Refill the tank of a gas car",
        "annotator": "xiao dong",
        "steps": [
            [
                {
                    "type": "step",
                    "step": "Start."
                }
            ],
            [
                {
                    "type": "step",
                    "step": "Drive to a gas station"
                }
            ],
            [
                {
                    "type": "step",
                    "step": "Pull up in front of a gas pump"
                }
            ],
            [
                {
                    "type": "step",
                    "step": "Insert the credit card"
                },
                {
                    "type": "predicted_event",
                    "event": "The price counter on the screen steadily increases.",
                    "change": "more likely"
                }
            ],
            [
                {
                    "type": "step",
                    "step": "Select the fuel grade"
                }
            ],
            [
                {
                    "type": "step",
                    "step": "Insert nozzle into the tank"
                },
                {
                    "type": "entity",
                    "entity": "the car",
                    "attribute": "connected to pump",
                    "change": "more likely"
                },
                {
                    "type": "event",
                    "event": "I drive the car away.",
                    "change": "less likely"
                },
                {
                    "type": "predicted_event",
                    "event": "The price counter on the screen steadily increases.",
                    "change": "less likely"
                }
            ],
            [
                {
                    "type": "step",
                    "step": "Begin fueling"
                },
                {
                    "type": "entity",
                    "entity": "pump",
                    "attribute": "running",
                    "change": "more likely"
                },
                {
                    "type": "event",
                    "event": "The price counter on the screen steadily increases.",
                    "change": "more likely"
                }
            ],
            [
                {
                    "type": "step",
                    "step": "Put the nozzle back"
                },
                {
                    "type": "entity",
                    "entity": "the car",
                    "attribute": "connected to pump",
                    "change": "less likely"
                },
                {
                    "type": "event",
                    "event": "I drive the car away.",
                    "change": "more likely"
                },
                {
                    "type": "entity",
                    "entity": "pump",
                    "attribute": "running",
                    "change": "less likely"
                },
                {
                    "type": "event",
                    "event": "The price counter on the screen steadily increases.",
                    "change": "less likely"
                },
                {
                    "type": "predicted_event",
                    "event": "I drive the car away.",
                    "change": "more likely"
                }
            ]
        ]
    },
    "65": {
        "goal": "Buying snacks in a grocery store ",
        "annotator": "xiao dong",
        "steps": [
            [
                {
                    "type": "step",
                    "step": "Start."
                }
            ],
            [
                {
                    "type": "step",
                    "step": "Go to a grocery store"
                }
            ],
            [
                {
                    "type": "step",
                    "step": "Find the snacks that you want to buy"
                }
            ],
            [
                {
                    "type": "step",
                    "step": "Put them into the basket"
                },
                {
                    "type": "predicted_event",
                    "event": "You start eating the snacks.",
                    "change": "more likely"
                }
            ],
            [
                {
                    "type": "step",
                    "step": "Wait in line at the register"
                }
            ],
            [
                {
                    "type": "step",
                    "step": "Pay for the snacks"
                },
                {
                    "type": "entity",
                    "entity": "snacks",
                    "attribute": "paid",
                    "change": "more likely"
                },
                {
                    "type": "event",
                    "event": "You start eating the snacks.",
                    "change": "more likely"
                }
            ]
        ]
    },
    "66": {
        "goal": "Cook whole fish",
        "annotator": "xiao dong",
        "steps": [
            [
                {
                    "type": "step",
                    "step": "Start."
                }
            ],
            [
                {
                    "type": "step",
                    "step": "Buy a piece of whole fish"
                }
            ],
            [
                {
                    "type": "step",
                    "step": "Clean the fish from inside to outside"
                }
            ],
            [
                {
                    "type": "step",
                    "step": "Towel dry the fish"
                }
            ],
            [
                {
                    "type": "step",
                    "step": "Deep fry the fish"
                },
                {
                    "type": "entity",
                    "entity": "fish",
                    "attribute": "fried",
                    "change": "more likely"
                },
                {
                    "type": "event",
                    "event": "The fish looks golden and brown.",
                    "change": "more likely"
                },
                {
                    "type": "event",
                    "event": "The fish is cruncy when chewed.",
                    "change": "more likely"
                },
                {
                    "type": "predicted_event",
                    "event": "The fish looks golden and brown.",
                    "change": "more likely"
                },
                {
                    "type": "predicted_event",
                    "event": "The fish is cruncy when chewed.",
                    "change": "more likely"
                }
            ],
            [
                {
                    "type": "step",
                    "step": "Take the fish out and drain excess oil"
                }
            ],
            [
                {
                    "type": "step",
                    "step": "Make the sauce for the fish"
                }
            ],
            [
                {
                    "type": "step",
                    "step": "Serve"
                }
            ]
        ]
    },
    "69": {
        "goal": "Watch a movie at theater",
        "annotator": "xiao dong",
        "steps": [
            [
                {
                    "type": "step",
                    "step": "Start."
                }
            ],
            [
                {
                    "type": "step",
                    "step": "Find a movie that seems good"
                },
                {
                    "type": "predicted_event",
                    "event": "I can use the ticket to enter the theater.",
                    "change": "more likely"
                }
            ],
            [
                {
                    "type": "step",
                    "step": "Buy ticket online"
                },
                {
                    "type": "entity",
                    "entity": "ticket",
                    "attribute": "vaild",
                    "change": "more likely"
                },
                {
                    "type": "event",
                    "event": "I can use the ticket to enter the theater.",
                    "change": "more likely"
                }
            ],
            [
                {
                    "type": "step",
                    "step": "Drive to the theater"
                }
            ],
            [
                {
                    "type": "step",
                    "step": "Check-in"
                },
                {
                    "type": "entity",
                    "entity": "ticket",
                    "attribute": "vaild",
                    "change": "less likely"
                },
                {
                    "type": "event",
                    "event": "I can use the ticket to enter the theater.",
                    "change": "less likely"
                }
            ],
            [
                {
                    "type": "step",
                    "step": "Enjoy the movie"
                }
            ]
        ]
    },
    "71": {
        "goal": "Make an apple pie",
        "annotator": "sean tedesco",
        "steps": [
            [
                {
                    "type": "step",
                    "step": "Start."
                }
            ],
            [
                {
                    "type": "step",
                    "step": "Whisk the flour, sugar, salt."
                },
                {
                    "type": "predicted_event",
                    "event": "The apples can be combined with other seasoning.",
                    "change": "more likely"
                }
            ],
            [
                {
                    "type": "step",
                    "step": "Mix the butter cubes into the bowl to form the dough."
                }
            ],
            [
                {
                    "type": "step",
                    "step": "Roll the dough into a rectangle."
                }
            ],
            [
                {
                    "type": "step",
                    "step": "Shake the brown sugar and seasoning into a plastic bag"
                },
                {
                    "type": "predicted_event",
                    "event": "The pie is safe to eat.",
                    "change": "more likely"
                }
            ],
            [
                {
                    "type": "step",
                    "step": "Peel, core, and cut the apples. "
                },
                {
                    "type": "entity",
                    "entity": "the apples",
                    "attribute": "in whole",
                    "change": "less likely"
                },
                {
                    "type": "event",
                    "event": "The apples can be combined with other seasoning.",
                    "change": "more likely"
                }
            ],
            [
                {
                    "type": "step",
                    "step": "Add the apples to the bag and shake them. "
                }
            ],
            [
                {
                    "type": "step",
                    "step": "Assemble the pie. "
                }
            ],
            [
                {
                    "type": "step",
                    "step": "Cook the pie at 400 degrees for 75 min. "
                }
            ],
            [
                {
                    "type": "step",
                    "step": "Cool the pie for 1 hour before serving."
                },
                {
                    "type": "entity",
                    "entity": "the pie",
                    "attribute": "cooked",
                    "change": "more likely"
                },
                {
                    "type": "event",
                    "event": "The pie is safe to eat.",
                    "change": "more likely"
                }
            ],
            [
                {
                    "type": "step",
                    "step": "Cut the pie and serve with whip cream and chosen toppings."
                }
            ]
        ]
    },
    "74": {
        "goal": "Washing dishes",
        "annotator": "sean tedesco",
        "steps": [
            [
                {
                    "type": "step",
                    "step": "Start."
                }
            ],
            [
                {
                    "type": "step",
                    "step": "Put the dirty dishes in the sink."
                }
            ],
            [
                {
                    "type": "step",
                    "step": "Put dish soap on the sponge. "
                },
                {
                    "type": "entity",
                    "entity": "the sponge",
                    "attribute": "covered in soap",
                    "change": "more likely"
                },
                {
                    "type": "event",
                    "event": "Bubbles can be seen on the sponge.",
                    "change": "more likely"
                }
            ],
            [
                {
                    "type": "step",
                    "step": "Scrub each dishes with the sponge until clean. "
                },
                {
                    "type": "entity",
                    "entity": "the dishes",
                    "attribute": "dirty",
                    "change": "less likely"
                },
                {
                    "type": "event",
                    "event": "Food residue can be seen on the dishes.",
                    "change": "less likely"
                },
                {
                    "type": "predicted_event",
                    "event": "Bubbles can be seen on the sponge.",
                    "change": "more likely"
                }
            ],
            [
                {
                    "type": "step",
                    "step": "Place each clean dish in the drying rack. "
                },
                {
                    "type": "predicted_event",
                    "event": "Food residue can be seen on the dishes.",
                    "change": "less likely"
                }
            ],
            [
                {
                    "type": "step",
                    "step": "Clean and store the sponge."
                },
                {
                    "type": "entity",
                    "entity": "the sponge",
                    "attribute": "covered in soap",
                    "change": "less likely"
                },
                {
                    "type": "event",
                    "event": "Bubbles can be seen on the sponge.",
                    "change": "more likely"
                },
                {
                    "type": "predicted_event",
                    "event": "Bubbles can be seen on the sponge.",
                    "change": "less likely"
                }
            ],
            [
                {
                    "type": "step",
                    "step": "Put dishes away. "
                }
            ]
        ]
    },
    "75": {
        "goal": "Make a bed",
        "annotator": "sean tedesco",
        "steps": [
            [
                {
                    "type": "step",
                    "step": "Start."
                }
            ],
            [
                {
                    "type": "step",
                    "step": "Strip the sheets from the mattress and pillows. "
                },
                {
                    "type": "entity",
                    "entity": "the mattress",
                    "attribute": "covered",
                    "change": "less likely"
                },
                {
                    "type": "event",
                    "event": "I can see the texture of the mattress.",
                    "change": "more likely"
                },
                {
                    "type": "entity",
                    "entity": "the pillows",
                    "attribute": "covered",
                    "change": "less likely"
                },
                {
                    "type": "event",
                    "event": "I can see the texture of the pillows.",
                    "change": "more likely"
                }
            ],
            [
                {
                    "type": "step",
                    "step": "Get clean sheets."
                }
            ],
            [
                {
                    "type": "step",
                    "step": "Put the fitted sheet on first."
                },
                {
                    "type": "entity",
                    "entity": "the mattress",
                    "attribute": "covered",
                    "change": "more likely"
                },
                {
                    "type": "event",
                    "event": "I can see the texture of the mattress.",
                    "change": "less likely"
                }
            ],
            [
                {
                    "type": "step",
                    "step": "Put on the flat sheet tucking it under the foot of the mattress."
                },
                {
                    "type": "predicted_event",
                    "event": "I can see the texture of the pillows.",
                    "change": "more likely"
                }
            ],
            [
                {
                    "type": "step",
                    "step": "Place comforter on top of mattress."
                }
            ],
            [
                {
                    "type": "step",
                    "step": "Put on any pillowcases and place on head of the mattress."
                },
                {
                    "type": "entity",
                    "entity": "the pillows",
                    "attribute": "covered",
                    "change": "more likely"
                },
                {
                    "type": "event",
                    "event": "I can see the texture of the pillows.",
                    "change": "less likely"
                }
            ],
            [
                {
                    "type": "step",
                    "step": "Place any blankets or additional pillows on mattress. "
                }
            ]
        ]
    },
    "77": {
        "goal": "Wax a car",
        "annotator": "sean tedesco",
        "steps": [
            [
                {
                    "type": "step",
                    "step": "Start."
                }
            ],
            [
                {
                    "type": "step",
                    "step": "Park your car in a shaded spot. "
                },
                {
                    "type": "entity",
                    "entity": "the car",
                    "attribute": "shaded",
                    "change": "more likely"
                },
                {
                    "type": "event",
                    "event": "Direct sunlight hits the car.",
                    "change": "less likely"
                },
                {
                    "type": "predicted_event",
                    "event": "Direct sunlight hits the car.",
                    "change": "more likely"
                }
            ],
            [
                {
                    "type": "step",
                    "step": "Clean your car of dirt and grime."
                },
                {
                    "type": "predicted_event",
                    "event": "The waxing pad makes the things it touches wet.",
                    "change": "more likely"
                }
            ],
            [
                {
                    "type": "step",
                    "step": "Get out wax and a waxing pad. "
                },
                {
                    "type": "predicted_event",
                    "event": "The car is more reflective.",
                    "change": "more likely"
                }
            ],
            [
                {
                    "type": "step",
                    "step": "Squeeze wax on to the pad."
                },
                {
                    "type": "entity",
                    "entity": "the waxing pad",
                    "attribute": "dry",
                    "change": "less likely"
                },
                {
                    "type": "event",
                    "event": "The waxing pad makes the things it touches wet.",
                    "change": "more likely"
                }
            ],
            [
                {
                    "type": "step",
                    "step": "Apply wax in circular motions firmly to the car paint."
                },
                {
                    "type": "entity",
                    "entity": "the wax",
                    "attribute": "on the car",
                    "change": "more likely"
                },
                {
                    "type": "event",
                    "event": "The car is more reflective.",
                    "change": "more likely"
                }
            ],
            [
                {
                    "type": "step",
                    "step": "Leave applied for 15 min."
                }
            ],
            [
                {
                    "type": "step",
                    "step": "Wipe away the excess wax with a clean cloth."
                }
            ],
            [
                {
                    "type": "step",
                    "step": "Repeat until every painted body panel is complete. "
                }
            ]
        ]
    },
    "79": {
        "goal": "Use an oil diffuser",
        "annotator": "sean tedesco",
        "steps": [
            [
                {
                    "type": "step",
                    "step": "Start."
                }
            ],
            [
                {
                    "type": "step",
                    "step": "Open the oil diffuser lid."
                },
                {
                    "type": "entity",
                    "entity": "the lid",
                    "attribute": "closed",
                    "change": "less likely"
                },
                {
                    "type": "event",
                    "event": "I can add oil to the diffuser.",
                    "change": "more likely"
                }
            ],
            [
                {
                    "type": "step",
                    "step": "Choose an oil."
                },
                {
                    "type": "predicted_event",
                    "event": "I can add oil to the diffuser.",
                    "change": "less likely"
                },
                {
                    "type": "predicted_event",
                    "event": "I smell the diffused oil.",
                    "change": "more likely"
                }
            ],
            [
                {
                    "type": "step",
                    "step": "Drop 5-10 drops of the oil into the diffuser."
                },
                {
                    "type": "entity",
                    "entity": "the diffuser",
                    "attribute": "empty",
                    "change": "less likely"
                },
                {
                    "type": "event",
                    "event": "I can see the buttom of the diffuser.",
                    "change": "less likely"
                },
                {
                    "type": "predicted_event",
                    "event": "I can see the buttom of the diffuser.",
                    "change": "less likely"
                }
            ],
            [
                {
                    "type": "step",
                    "step": "Add water."
                }
            ],
            [
                {
                    "type": "step",
                    "step": "Close the lid."
                },
                {
                    "type": "entity",
                    "entity": "the lid",
                    "attribute": "closed",
                    "change": "more likely"
                },
                {
                    "type": "event",
                    "event": "I can add oil to the diffuser.",
                    "change": "more likely"
                }
            ],
            [
                {
                    "type": "step",
                    "step": "Turn on the diffuser."
                },
                {
                    "type": "entity",
                    "entity": "oil",
                    "attribute": "diffused",
                    "change": "more likely"
                },
                {
                    "type": "event",
                    "event": "I smell the diffused oil.",
                    "change": "more likely"
                }
            ],
            [
                {
                    "type": "step",
                    "step": "Run for set time. "
                }
            ]
        ]
    },
    "80": {
        "goal": "Take a shower",
        "annotator": "sean tedesco",
        "steps": [
            [
                {
                    "type": "step",
                    "step": "Start."
                }
            ],
            [
                {
                    "type": "step",
                    "step": "Turn on the shower."
                },
                {
                    "type": "entity",
                    "entity": "the water",
                    "attribute": "running",
                    "change": "more likely"
                },
                {
                    "type": "event",
                    "event": "I can feel the temperature of the water.",
                    "change": "more likely"
                },
                {
                    "type": "predicted_event",
                    "event": "There are bubbles on your body.",
                    "change": "more likely"
                }
            ],
            [
                {
                    "type": "step",
                    "step": "Undress."
                },
                {
                    "type": "predicted_event",
                    "event": "I can feel the temperature of the water.",
                    "change": "more likely"
                }
            ],
            [
                {
                    "type": "step",
                    "step": "Test the water temperature and adjust as needed."
                }
            ],
            [
                {
                    "type": "step",
                    "step": "Enter the shower. "
                },
                {
                    "type": "predicted_event",
                    "event": "There are bubbles on your body.",
                    "change": "less likely"
                }
            ],
            [
                {
                    "type": "step",
                    "step": "Soap yourself."
                },
                {
                    "type": "entity",
                    "entity": "you",
                    "attribute": "soapy",
                    "change": "more likely"
                },
                {
                    "type": "event",
                    "event": "There are bubbles on your body.",
                    "change": "more likely"
                },
                {
                    "type": "predicted_event",
                    "event": "I can feel the temperature of the water.",
                    "change": "less likely"
                }
            ],
            [
                {
                    "type": "step",
                    "step": "Shampoo & condition your hair."
                }
            ],
            [
                {
                    "type": "step",
                    "step": "Rinse off."
                },
                {
                    "type": "entity",
                    "entity": "you",
                    "attribute": "soapy",
                    "change": "less likely"
                },
                {
                    "type": "event",
                    "event": "There are bubbles on your body.",
                    "change": "less likely"
                }
            ],
            [
                {
                    "type": "step",
                    "step": "Turn off the shower. "
                },
                {
                    "type": "entity",
                    "entity": "the water",
                    "attribute": "running",
                    "change": "less likely"
                },
                {
                    "type": "event",
                    "event": "I can feel the temperature of the water.",
                    "change": "less likely"
                }
            ],
            [
                {
                    "type": "step",
                    "step": "Exit the shower. "
                }
            ]
        ]
    },
    "81": {
        "goal": "Hit a tennis ball with a tennis racquet",
        "annotator": "sidney pho",
        "steps": [
            [
                {
                    "type": "step",
                    "step": "Start."
                }
            ],
            [
                {
                    "type": "step",
                    "step": "Throw the ball up into the air in front of you."
                },
                {
                    "type": "predicted_event",
                    "event": "A boom sound can be heard.",
                    "change": "more likely"
                }
            ],
            [
                {
                    "type": "step",
                    "step": "Let it bounce once."
                }
            ],
            [
                {
                    "type": "step",
                    "step": "Position your body to swing at the ball."
                }
            ],
            [
                {
                    "type": "step",
                    "step": "Let the ball come back up after the bounce to waist level."
                }
            ],
            [
                {
                    "type": "step",
                    "step": "Swing at the ball."
                },
                {
                    "type": "entity",
                    "entity": "tennis ball",
                    "attribute": "contacting the racquet",
                    "change": "more likely"
                },
                {
                    "type": "event",
                    "event": "A boom sound can be heard.",
                    "change": "more likely"
                }
            ],
            [
                {
                    "type": "step",
                    "step": "Finish with your racquet behind your other shoulder."
                }
            ]
        ]
    },
    "82": {
        "goal": "Throw a frisbee",
        "annotator": "sidney pho",
        "steps": [
            [
                {
                    "type": "step",
                    "step": "Start."
                }
            ],
            [
                {
                    "type": "step",
                    "step": "Pick up the frisbee."
                },
                {
                    "type": "entity",
                    "entity": "frisbee",
                    "attribute": "in hand",
                    "change": "more likely"
                },
                {
                    "type": "event",
                    "event": "Someone catches the frisbee.",
                    "change": "less likely"
                }
            ],
            [
                {
                    "type": "step",
                    "step": "Hold the frisbee by the edge."
                }
            ],
            [
                {
                    "type": "step",
                    "step": "Wind up the frisbee towards your chest, with your elbow sticking out."
                },
                {
                    "type": "predicted_event",
                    "event": "Someone catches the frisbee.",
                    "change": "more likely"
                }
            ],
            [
                {
                    "type": "step",
                    "step": "Stretch out your arm completely while holding frisbee."
                }
            ],
            [
                {
                    "type": "step",
                    "step": "Release frisbee in direction you want to release."
                },
                {
                    "type": "entity",
                    "entity": "frisbee",
                    "attribute": "in hand",
                    "change": "less likely"
                },
                {
                    "type": "event",
                    "event": "Someone catches the frisbee.",
                    "change": "more likely"
                }
            ],
            [
                {
                    "type": "step",
                    "step": "Follow through completely with your arm to maintain momentum."
                }
            ]
        ]
    },
    "84": {
        "goal": "Snowboarding down a skii slope",
        "annotator": "sidney pho",
        "steps": [
            [
                {
                    "type": "step",
                    "step": "Start."
                }
            ],
            [
                {
                    "type": "step",
                    "step": "Get off skii lift."
                },
                {
                    "type": "predicted_event",
                    "event": "You pick up the snowboard.",
                    "change": "more likely"
                }
            ],
            [
                {
                    "type": "step",
                    "step": "Secure the snowboard to your shoes."
                },
                {
                    "type": "entity",
                    "entity": "snowboard",
                    "attribute": "attached",
                    "change": "more likely"
                },
                {
                    "type": "event",
                    "event": "You pick up the snowboard.",
                    "change": "less likely"
                }
            ],
            [
                {
                    "type": "step",
                    "step": "Start moving your body down the slope while standing on the snowboard."
                }
            ],
            [
                {
                    "type": "step",
                    "step": "Move your legs in the direction of the bottom."
                }
            ],
            [
                {
                    "type": "step",
                    "step": "Slide down the snow standing on the snowboard."
                }
            ],
            [
                {
                    "type": "step",
                    "step": "Remove the snowboard."
                },
                {
                    "type": "entity",
                    "entity": "snowboard",
                    "attribute": "attached",
                    "change": "less likely"
                },
                {
                    "type": "event",
                    "event": "You pick up the snowboard.",
                    "change": "more likely"
                }
            ]
        ]
    },
    "85": {
        "goal": "Shoot an arrow",
        "annotator": "sidney pho",
        "steps": [
            [
                {
                    "type": "step",
                    "step": "Start."
                }
            ],
            [
                {
                    "type": "step",
                    "step": "Hold the bow with your less dominant hand."
                },
                {
                    "type": "predicted_event",
                    "event": "The arrow is about to be shot.",
                    "change": "more likely"
                },
                {
                    "type": "predicted_event",
                    "event": "Great force is needed to hold the bow.",
                    "change": "more likely"
                }
            ],
            [
                {
                    "type": "step",
                    "step": "Grab the arrow with your dominant hand."
                },
                {
                    "type": "entity",
                    "entity": "both hands",
                    "attribute": "occupied",
                    "change": "more likely"
                },
                {
                    "type": "event",
                    "event": "You take out the phone to check the time.",
                    "change": "less likely"
                }
            ],
            [
                {
                    "type": "step",
                    "step": "Position arrow onto the bow."
                },
                {
                    "type": "entity",
                    "entity": "arrow",
                    "attribute": "on the bow",
                    "change": "more likely"
                },
                {
                    "type": "event",
                    "event": "The arrow is about to be shot.",
                    "change": "more likely"
                },
                {
                    "type": "predicted_event",
                    "event": "The arrow is about to be shot.",
                    "change": "less likely"
                },
                {
                    "type": "predicted_event",
                    "event": "Great force is needed to hold the bow.",
                    "change": "less likely"
                }
            ],
            [
                {
                    "type": "step",
                    "step": "Pull bow string backwards as arrow back is positioned on string."
                },
                {
                    "type": "entity",
                    "entity": "bow string",
                    "attribute": "tense",
                    "change": "more likely"
                },
                {
                    "type": "event",
                    "event": "Great force is needed to hold the bow.",
                    "change": "more likely"
                },
                {
                    "type": "predicted_event",
                    "event": "You take out the phone to check the time.",
                    "change": "more likely"
                }
            ],
            [
                {
                    "type": "step",
                    "step": "Aim in the direction you want to shoot."
                }
            ],
            [
                {
                    "type": "step",
                    "step": "Let go of string."
                },
                {
                    "type": "entity",
                    "entity": "bow string",
                    "attribute": "tense",
                    "change": "less likely"
                },
                {
                    "type": "event",
                    "event": "Great force is needed to hold the bow.",
                    "change": "less likely"
                },
                {
                    "type": "entity",
                    "entity": "both hands",
                    "attribute": "occupied",
                    "change": "more likely"
                },
                {
                    "type": "event",
                    "event": "You take out the phone to check the time.",
                    "change": "less likely"
                },
                {
                    "type": "entity",
                    "entity": "arrow",
                    "attribute": "on the bow",
                    "change": "less likely"
                },
                {
                    "type": "event",
                    "event": "The arrow is about to be shot.",
                    "change": "less likely"
                }
            ]
        ]
    },
    "86": {
        "goal": "Taking an at-home COVID test",
        "annotator": "sidney pho",
        "steps": [
            [
                {
                    "type": "step",
                    "step": "Start."
                }
            ],
            [
                {
                    "type": "step",
                    "step": "Open the packaging."
                },
                {
                    "type": "entity",
                    "entity": "the packaging",
                    "attribute": "opened",
                    "change": "more likely"
                },
                {
                    "type": "event",
                    "event": "I refund or exchange the test kit.",
                    "change": "less likely"
                }
            ],
            [
                {
                    "type": "step",
                    "step": "Remove the nasal swab."
                }
            ],
            [
                {
                    "type": "step",
                    "step": "Insert nasal swab about an inch up your nose."
                },
                {
                    "type": "entity",
                    "entity": "nasal swab",
                    "attribute": "in nose",
                    "change": "more likely"
                },
                {
                    "type": "event",
                    "event": "I feel a serious irritation.",
                    "change": "more likely"
                }
            ],
            [
                {
                    "type": "step",
                    "step": "Twirl nasal swab around for 15 seconds."
                },
                {
                    "type": "predicted_event",
                    "event": "I refund or exchange the test kit.",
                    "change": "less likely"
                },
                {
                    "type": "predicted_event",
                    "event": "I feel a serious irritation.",
                    "change": "more likely"
                },
                {
                    "type": "predicted_event",
                    "event": "I know if I have COVID.",
                    "change": "more likely"
                }
            ],
            [
                {
                    "type": "step",
                    "step": "Place nasal swab immediately into liquid container."
                },
                {
                    "type": "entity",
                    "entity": "nasal swab",
                    "attribute": "in nose",
                    "change": "less likely"
                },
                {
                    "type": "event",
                    "event": "I feel a serious irritation.",
                    "change": "less likely"
                }
            ],
            [
                {
                    "type": "step",
                    "step": "Break nasal swab and close container."
                },
                {
                    "type": "predicted_event",
                    "event": "I know if I have COVID.",
                    "change": "more likely"
                }
            ],
            [
                {
                    "type": "step",
                    "step": "Mix the container."
                }
            ],
            [
                {
                    "type": "step",
                    "step": "Place a drop of the liquid inside container on the measuring device."
                }
            ],
            [
                {
                    "type": "step",
                    "step": "Wait 10 minutes and check."
                },
                {
                    "type": "entity",
                    "entity": "COVID test result",
                    "attribute": "displayed",
                    "change": "more likely"
                },
                {
                    "type": "event",
                    "event": "I know if I have COVID.",
                    "change": "more likely"
                }
            ]
        ]
    },
    "88": {
        "goal": "Making boba milk tea",
        "annotator": "sidney pho",
        "steps": [
            [
                {
                    "type": "step",
                    "step": "Start."
                }
            ],
            [
                {
                    "type": "step",
                    "step": "Start boiling water."
                }
            ],
            [
                {
                    "type": "step",
                    "step": "Mix some water with boba powder packet."
                }
            ],
            [
                {
                    "type": "step",
                    "step": "Use the remaining water to cook tapioca balls."
                }
            ],
            [
                {
                    "type": "step",
                    "step": "Let tapioca balls cool down."
                },
                {
                    "type": "predicted_event",
                    "event": "I get a mix of boba and tea when I sip my drink.",
                    "change": "more likely"
                }
            ],
            [
                {
                    "type": "step",
                    "step": "Place tapioca balls and then ice into a cup."
                }
            ],
            [
                {
                    "type": "step",
                    "step": "Pour boba drink into the cup."
                },
                {
                    "type": "entity",
                    "entity": "boba milk tea",
                    "attribute": "drinkable",
                    "change": "more likely"
                },
                {
                    "type": "event",
                    "event": "I get a mix of boba and tea when I sip my drink.",
                    "change": "more likely"
                }
            ],
            [
                {
                    "type": "step",
                    "step": "Mix thorougly."
                }
            ]
        ]
    },
    "89": {
        "goal": "Climbing a rock",
        "annotator": "sidney pho",
        "steps": [
            [
                {
                    "type": "step",
                    "step": "Start."
                }
            ],
            [
                {
                    "type": "step",
                    "step": "Place hands on crevices of rock."
                },
                {
                    "type": "predicted_event",
                    "event": "You fall from the rock.",
                    "change": "less likely"
                }
            ],
            [
                {
                    "type": "step",
                    "step": "Grip crevices securely."
                }
            ],
            [
                {
                    "type": "step",
                    "step": "Place feet on crevices of rock."
                },
                {
                    "type": "entity",
                    "entity": "my hands and feet",
                    "attribute": "secured",
                    "change": "more likely"
                },
                {
                    "type": "event",
                    "event": "You fall from the rock.",
                    "change": "less likely"
                }
            ],
            [
                {
                    "type": "step",
                    "step": "Pull your body up towards the sky."
                },
                {
                    "type": "entity",
                    "entity": "you",
                    "attribute": "higher",
                    "change": "more likely"
                },
                {
                    "type": "event",
                    "event": "I can reach rocks I couldn't previously.",
                    "change": "more likely"
                },
                {
                    "type": "predicted_event",
                    "event": "You fall from the rock.",
                    "change": "more likely"
                },
                {
                    "type": "predicted_event",
                    "event": "I can reach rocks I couldn't previously.",
                    "change": "more likely"
                }
            ],
            [
                {
                    "type": "step",
                    "step": "Continue finding crevices higher."
                }
            ],
            [
                {
                    "type": "step",
                    "step": "Continue gripping and pulling until you reach the top."
                }
            ]
        ]
    },
    "90": {
        "goal": "Changing a flat tire with a spare tire",
        "annotator": "sidney pho",
        "steps": [
            [
                {
                    "type": "step",
                    "step": "Start."
                }
            ],
            [
                {
                    "type": "step",
                    "step": "Grab spare tire from bottom layer of the trunk."
                },
                {
                    "type": "predicted_event",
                    "event": "At least one wheel is not fully touching the ground.",
                    "change": "more likely"
                }
            ],
            [
                {
                    "type": "step",
                    "step": "Place spare tire on the side."
                },
                {
                    "type": "predicted_event",
                    "event": "The flat tire can be easily removed.",
                    "change": "more likely"
                }
            ],
            [
                {
                    "type": "step",
                    "step": "Lift car using scissor jack."
                },
                {
                    "type": "entity",
                    "entity": "car",
                    "attribute": "lifted",
                    "change": "more likely"
                },
                {
                    "type": "event",
                    "event": "At least one wheel is not fully touching the ground.",
                    "change": "more likely"
                }
            ],
            [
                {
                    "type": "step",
                    "step": "Grab wrench to unbolt flat tire bolts."
                },
                {
                    "type": "entity",
                    "entity": "flat tire",
                    "attribute": "secured",
                    "change": "less likely"
                },
                {
                    "type": "event",
                    "event": "The flat tire can be easily removed.",
                    "change": "more likely"
                },
                {
                    "type": "predicted_event",
                    "event": "At least one wheel is not fully touching the ground.",
                    "change": "less likely"
                }
            ],
            [
                {
                    "type": "step",
                    "step": "Remove the flat tire off the car's axle."
                },
                {
                    "type": "entity",
                    "entity": "flat tire",
                    "attribute": "on the car",
                    "change": "less likely"
                },
                {
                    "type": "event",
                    "event": "The flat tire can be easily removed.",
                    "change": "less likely"
                }
            ],
            [
                {
                    "type": "step",
                    "step": "Place spare tire on the axle."
                }
            ],
            [
                {
                    "type": "step",
                    "step": "Bolt spare tire onto axle."
                }
            ],
            [
                {
                    "type": "step",
                    "step": "Release scissor jack."
                },
                {
                    "type": "entity",
                    "entity": "car",
                    "attribute": "lifted",
                    "change": "less likely"
                },
                {
                    "type": "event",
                    "event": "At least one wheel is not fully touching the ground.",
                    "change": "less likely"
                }
            ]
        ]
    },
    "92": {
        "goal": "Make instant cup noodles",
        "annotator": "YongHyun Park",
        "steps": [
            [
                {
                    "type": "step",
                    "step": "Start."
                }
            ],
            [
                {
                    "type": "step",
                    "step": "Remove the plastic packaging."
                }
            ],
            [
                {
                    "type": "step",
                    "step": "Open the top of the cup half way."
                }
            ],
            [
                {
                    "type": "step",
                    "step": "Pour boiling water into the cup until the water reaches the line."
                },
                {
                    "type": "entity",
                    "entity": "cup",
                    "attribute": "hot",
                    "change": "more likely"
                },
                {
                    "type": "event",
                    "event": "We grap the cup safely for long time.",
                    "change": "less likely"
                }
            ],
            [
                {
                    "type": "step",
                    "step": "Close the lid and pinch shut."
                },
                {
                    "type": "predicted_event",
                    "event": "We chew the noodle easily.",
                    "change": "more likely"
                }
            ],
            [
                {
                    "type": "step",
                    "step": "Set a timer for two minutes and thirty seconds."
                },
                {
                    "type": "predicted_event",
                    "event": "We grap the cup safely for long time.",
                    "change": "less likely"
                }
            ],
            [
                {
                    "type": "step",
                    "step": "Wait for the timer to run out."
                },
                {
                    "type": "entity",
                    "entity": "noodle",
                    "attribute": "soft",
                    "change": "more likely"
                }
            ],
            [
                {
                    "type": "step",
                    "step": "Open the cup and enjoy the noodles. "
                },
                {
                    "type": "event",
                    "event": "We chew the noodle easily.",
                    "change": "more likely"
                }
            ]
        ]
    },
    "100": {
        "goal": "Mail a postcard",
        "annotator": "YongHyun Park",
        "steps": [
            [
                {
                    "type": "step",
                    "step": "Start."
                }
            ],
            [
                {
                    "type": "step",
                    "step": "Buy a postcard with a pretty picture on it."
                },
                {
                    "type": "predicted_event",
                    "event": "Someone can read something on the postcard.",
                    "change": "more likely"
                }
            ],
            [
                {
                    "type": "step",
                    "step": "Write a message on the postcard."
                },
                {
                    "type": "entity",
                    "entity": "postcard",
                    "attribute": "blank",
                    "change": "less likely"
                },
                {
                    "type": "event",
                    "event": "Someone can read something on the postcard.",
                    "change": "more likely"
                }
            ],
            [
                {
                    "type": "step",
                    "step": "Add the address of the person you are writing to."
                },
                {
                    "type": "predicted_event",
                    "event": "If the postcard is put into a mailbox, it will be mailed.",
                    "change": "more likely"
                }
            ],
            [
                {
                    "type": "step",
                    "step": "Take the postcard to the post office."
                }
            ],
            [
                {
                    "type": "step",
                    "step": "Buy a stamp."
                }
            ],
            [
                {
                    "type": "step",
                    "step": "Stick the stamp on the postcard."
                },
                {
                    "type": "entity",
                    "entity": "stamp",
                    "attribute": "attached",
                    "change": "more likely"
                },
                {
                    "type": "event",
                    "event": "If the postcard is put into a mailbox, it will be mailed.",
                    "change": "more likely"
                }
            ],
            [
                {
                    "type": "step",
                    "step": "Drop the postcard into the mailbox."
                }
            ]
        ]
    },
    "101": {
        "goal": "Drying damp book",
        "annotator": "ec hause",
        "steps": [
            [
                {
                    "type": "step",
                    "step": "Start."
                }
            ],
            [
                {
                    "type": "step",
                    "step": "Find a dry room"
                },
                {
                    "type": "predicted_event",
                    "event": "It is likely to read book without permanently damaging it.",
                    "change": "less likely"
                }
            ],
            [
                {
                    "type": "step",
                    "step": "Stand book upright in room"
                },
                {
                    "type": "predicted_event",
                    "event": "It is likely to read book without permanently damaging it.",
                    "change": "less likely"
                }
            ],
            [
                {
                    "type": "step",
                    "step": "Fan out pages"
                },
                {
                    "type": "predicted_event",
                    "event": "It is likely to read book without permanently damaging it.",
                    "change": "less likely"
                }
            ],
            [
                {
                    "type": "step",
                    "step": "Direct airflow on book"
                },
                {
                    "type": "predicted_event",
                    "event": "It is likely to read book without permanently damaging it.",
                    "change": "less likely"
                }
            ],
            [
                {
                    "type": "step",
                    "step": "When dry, place under weight to flatten pages"
                },
                {
                    "type": "entity",
                    "entity": "the book",
                    "attribute": "wet",
                    "change": "less likely"
                },
                {
                    "type": "entity",
                    "entity": "the pages",
                    "attribute": "pliable",
                    "change": "less likely"
                },
                {
                    "type": "event",
                    "event": "It is likely to read book without permanently damaging it.",
                    "change": "more likely"
                },
                {
                    "type": "predicted_event",
                    "event": "It is likely to read book without permanently damaging it.",
                    "change": "more likely"
                }
            ]
        ]
    },
    "104": {
        "goal": "Prepare a Milkshake",
        "annotator": "ec hause",
        "steps": [
            [
                {
                    "type": "step",
                    "step": "Start."
                }
            ],
            [
                {
                    "type": "step",
                    "step": "Place desired ice cream into a blender"
                },
                {
                    "type": "predicted_event",
                    "event": "Great noise can be heard.",
                    "change": "more likely"
                }
            ],
            [
                {
                    "type": "step",
                    "step": "Create mixture by adding milk to the ice cream"
                },
                {
                    "type": "predicted_event",
                    "event": "Great noise can be heard.",
                    "change": "more likely"
                }
            ],
            [
                {
                    "type": "step",
                    "step": "Turn on blender"
                },
                {
                    "type": "entity",
                    "entity": "the blender",
                    "attribute": "on",
                    "change": "more likely"
                },
                {
                    "type": "event",
                    "event": "Great noise can be heard.",
                    "change": "more likely"
                },
                {
                    "type": "predicted_event",
                    "event": "Great noise can be heard.",
                    "change": "more likely"
                }
            ],
            [
                {
                    "type": "step",
                    "step": "Turn off blender"
                },
                {
                    "type": "entity",
                    "entity": "the blender",
                    "attribute": "on",
                    "change": "less likely"
                },
                {
                    "type": "event",
                    "event": "Great noise can be heard.",
                    "change": "less likely"
                },
                {
                    "type": "predicted_event",
                    "event": "Great noise can be heard.",
                    "change": "more likely"
                }
            ],
            [
                {
                    "type": "step",
                    "step": "Place mixture into cup"
                },
                {
                    "type": "event",
                    "event": "The milkshake is presentable.",
                    "change": "more likely"
                },
                {
                    "type": "event",
                    "event": "I serve the milkshake to a friend.",
                    "change": "more likely"
                },
                {
                    "type": "predicted_event",
                    "event": "Great noise can be heard.",
                    "change": "more likely"
                }
            ],
            [
                {
                    "type": "step",
                    "step": "Place straw"
                },
                {
                    "type": "predicted_event",
                    "event": "Great noise can be heard.",
                    "change": "less likely"
                }
            ]
        ]
    },
    "105": {
        "goal": "Supercharge a Tesla",
        "annotator": "ec hause",
        "steps": [
            [
                {
                    "type": "step",
                    "step": "Start."
                }
            ],
            [
                {
                    "type": "step",
                    "step": "Direct navigation to a Tesla supercharger"
                }
            ],
            [
                {
                    "type": "step",
                    "step": "Drive the Tesla to the supercharger"
                },
                {
                    "type": "predicted_event",
                    "event": "I drive the Tesla away for 200 miles.",
                    "change": "more likely"
                }
            ],
            [
                {
                    "type": "step",
                    "step": "Back the Tesla into a supercharger stall"
                }
            ],
            [
                {
                    "type": "step",
                    "step": "Open charge port on the Tesla"
                },
                {
                    "type": "predicted_event",
                    "event": "I safely drive 200 miles without stopping.",
                    "change": "more likely"
                }
            ],
            [
                {
                    "type": "step",
                    "step": "Exit vehicle"
                }
            ],
            [
                {
                    "type": "step",
                    "step": "Place stall's charger into the charge port"
                },
                {
                    "type": "entity",
                    "entity": "the Tesla",
                    "attribute": "being charded",
                    "change": "more likely"
                },
                {
                    "type": "event",
                    "event": "I drive the Tesla away for 200 miles.",
                    "change": "less likely"
                }
            ],
            [
                {
                    "type": "step",
                    "step": "Remove charger once vehicle is at desired level of charge"
                },
                {
                    "type": "entity",
                    "entity": "the Tesla",
                    "attribute": "drivable",
                    "change": "more likely"
                },
                {
                    "type": "entity",
                    "entity": "the Tesla",
                    "attribute": "being charded",
                    "change": "less likely"
                },
                {
                    "type": "event",
                    "event": "I safely drive 200 miles without stopping.",
                    "change": "more likely"
                }
            ]
        ]
    },
    "106": {
        "goal": "Play music from a phone over bluetooth speaker",
        "annotator": "ec hause",
        "steps": [
            [
                {
                    "type": "step",
                    "step": "Start."
                }
            ],
            [
                {
                    "type": "step",
                    "step": "Place bluetooth speaker into pairing mode"
                },
                {
                    "type": "predicted_event",
                    "event": "Sound from the phone can be heard on the bluetooth speaker.",
                    "change": "more likely"
                }
            ],
            [
                {
                    "type": "step",
                    "step": "Open bluetooth settings on phone"
                }
            ],
            [
                {
                    "type": "step",
                    "step": "Select bluetooth speaker in setting menu to pair"
                },
                {
                    "type": "entity",
                    "entity": "the bluetooth speaker",
                    "attribute": "paired",
                    "change": "more likely"
                },
                {
                    "type": "event",
                    "event": "Sound from the phone can be heard on the bluetooth speaker.",
                    "change": "more likely"
                }
            ],
            [
                {
                    "type": "step",
                    "step": "Open music application on phone"
                },
                {
                    "type": "predicted_event",
                    "event": "I can hear a song from the speaker.",
                    "change": "more likely"
                }
            ],
            [
                {
                    "type": "step",
                    "step": "Select a song or playlist in the music application to play"
                },
                {
                    "type": "entity",
                    "entity": "the bluetooth speaker",
                    "attribute": "playing music",
                    "change": "more likely"
                },
                {
                    "type": "event",
                    "event": "I can hear a song from the speaker.",
                    "change": "more likely"
                }
            ]
        ]
    },
    "107": {
        "goal": "Remove shoe odor with baking soda",
        "annotator": "ec hause",
        "steps": [
            [
                {
                    "type": "step",
                    "step": "Start."
                }
            ],
            [
                {
                    "type": "step",
                    "step": "Place at least one tablespoon of baking soda into the shoe"
                },
                {
                    "type": "entity",
                    "entity": "the shoe",
                    "attribute": "contain baking soda",
                    "change": "more likely"
                },
                {
                    "type": "event",
                    "event": "The shoe is wearable.",
                    "change": "less likely"
                }
            ],
            [
                {
                    "type": "step",
                    "step": "Shake shoe to distribute the baking soda"
                },
                {
                    "type": "predicted_event",
                    "event": "The shoe smells bad.",
                    "change": "less likely"
                }
            ],
            [
                {
                    "type": "step",
                    "step": "Wait 24 hours"
                },
                {
                    "type": "entity",
                    "entity": "the odor",
                    "attribute": "removed",
                    "change": "more likely"
                },
                {
                    "type": "event",
                    "event": "The shoe smells bad.",
                    "change": "less likely"
                }
            ],
            [
                {
                    "type": "step",
                    "step": "Dump the baking soda out of the shoe"
                },
                {
                    "type": "entity",
                    "entity": "the shoe",
                    "attribute": "contain baking soda",
                    "change": "less likely"
                },
                {
                    "type": "event",
                    "event": "The shoe is wearable.",
                    "change": "more likely"
                },
                {
                    "type": "predicted_event",
                    "event": "The shoe smells bad.",
                    "change": "more likely"
                }
            ]
        ]
    },
    "109": {
        "goal": "Pour a beer into a glass",
        "annotator": "ec hause",
        "steps": [
            [
                {
                    "type": "step",
                    "step": "Start."
                }
            ],
            [
                {
                    "type": "step",
                    "step": "Locate a clean glass for the beer"
                },
                {
                    "type": "predicted_event",
                    "event": "A sound of gas can be heard.",
                    "change": "more likely"
                }
            ],
            [
                {
                    "type": "step",
                    "step": "Open the beer can or bottle"
                },
                {
                    "type": "entity",
                    "entity": "beer can",
                    "attribute": "opened",
                    "change": "less likely"
                },
                {
                    "type": "event",
                    "event": "A sound of gas can be heard.",
                    "change": "more likely"
                }
            ],
            [
                {
                    "type": "step",
                    "step": "Hold the glass at a 45 degree angle"
                },
                {
                    "type": "predicted_event",
                    "event": "Knocking over the glass would get beer everywhere.",
                    "change": "more likely"
                }
            ],
            [
                {
                    "type": "step",
                    "step": "Start pouring beer into the glass without letting the container touch the glass"
                },
                {
                    "type": "entity",
                    "entity": "the glass",
                    "attribute": "empty",
                    "change": "less likely"
                },
                {
                    "type": "event",
                    "event": "Knocking over the glass would get beer everywhere.",
                    "change": "more likely"
                },
                {
                    "type": "predicted_event",
                    "event": "A sound of gas can be heard.",
                    "change": "less likely"
                }
            ],
            [
                {
                    "type": "step",
                    "step": "Stop pouring when foam nears the top of the glass"
                }
            ]
        ]
    },
    "110": {
        "goal": "Remove gum from the bottom of a shoe",
        "annotator": "ec hause",
        "steps": [
            [
                {
                    "type": "step",
                    "step": "Start."
                }
            ],
            [
                {
                    "type": "step",
                    "step": "Place the shoe in a plastic bag"
                },
                {
                    "type": "predicted_event",
                    "event": "The gum has a fixed shape.",
                    "change": "more likely"
                }
            ],
            [
                {
                    "type": "step",
                    "step": "Press the plastic bag against the gum stuck on the shoe"
                }
            ],
            [
                {
                    "type": "step",
                    "step": "Place the bagged shoe in a freezer"
                },
                {
                    "type": "predicted_event",
                    "event": "The gum has a fixed shape.",
                    "change": "less likely"
                },
                {
                    "type": "predicted_event",
                    "event": "The shoe is comfortable to walk in.",
                    "change": "more likely"
                }
            ],
            [
                {
                    "type": "step",
                    "step": "Wait 2 hours"
                },
                {
                    "type": "entity",
                    "entity": "the gum",
                    "attribute": "frozen",
                    "change": "more likely"
                },
                {
                    "type": "event",
                    "event": "The gum has a fixed shape.",
                    "change": "more likely"
                }
            ],
            [
                {
                    "type": "step",
                    "step": "Remove bagged shoe from freezer"
                }
            ],
            [
                {
                    "type": "step",
                    "step": "Remove shoe from plastic bag"
                },
                {
                    "type": "entity",
                    "entity": "the shoe",
                    "attribute": "clean",
                    "change": "more likely"
                },
                {
                    "type": "event",
                    "event": "The shoe is comfortable to walk in.",
                    "change": "more likely"
                }
            ]
        ]
    },
    "111": {
        "goal": "Make sushi",
        "annotator": "yuzhe shi",
        "steps": [
            [
                {
                    "type": "step",
                    "step": "Start."
                }
            ],
            [
                {
                    "type": "step",
                    "step": "Turn on rice cooker."
                },
                {
                    "type": "predicted_event",
                    "event": "The rice is white and smells good.",
                    "change": "more likely"
                }
            ],
            [
                {
                    "type": "step",
                    "step": "Put the rice in."
                }
            ],
            [
                {
                    "type": "step",
                    "step": "Set timer and cook the rice until timer is up."
                },
                {
                    "type": "entity",
                    "entity": "rice",
                    "attribute": "cooked",
                    "change": "more likely"
                },
                {
                    "type": "event",
                    "event": "The rice is white and smells good.",
                    "change": "more likely"
                }
            ],
            [
                {
                    "type": "step",
                    "step": "Take some rice out and pat it flat."
                }
            ],
            [
                {
                    "type": "step",
                    "step": "Put the raw fish on top of it."
                }
            ],
            [
                {
                    "type": "step",
                    "step": "Add soy sauce and wasabi."
                }
            ],
            [
                {
                    "type": "step",
                    "step": "Put the sushi on a plate and serve. "
                }
            ]
        ]
    },
    "112": {
        "goal": "Make a chicken sandwich",
        "annotator": "yuzhe shi",
        "steps": [
            [
                {
                    "type": "step",
                    "step": "Start."
                }
            ],
            [
                {
                    "type": "step",
                    "step": "Get the raw chicken."
                }
            ],
            [
                {
                    "type": "step",
                    "step": "Boil the water."
                }
            ],
            [
                {
                    "type": "step",
                    "step": "Add raw chicken inside hot water once boiled."
                }
            ],
            [
                {
                    "type": "step",
                    "step": "Take chicken out once cooked with inside not raw."
                },
                {
                    "type": "entity",
                    "entity": "chicken",
                    "attribute": "cooked",
                    "change": "more likely"
                },
                {
                    "type": "event",
                    "event": "The chiken is white.",
                    "change": "more likely"
                }
            ],
            [
                {
                    "type": "step",
                    "step": "Take two piece of bread. "
                }
            ],
            [
                {
                    "type": "step",
                    "step": "Add mayo and lettuce on to bread. "
                }
            ],
            [
                {
                    "type": "step",
                    "step": "Slice the chicken."
                }
            ],
            [
                {
                    "type": "step",
                    "step": "Put the chicken in the middle and serve."
                }
            ]
        ]
    },
    "115": {
        "goal": "Send a mail to a friend",
        "annotator": "yuzhe shi",
        "steps": [
            [
                {
                    "type": "step",
                    "step": "Start."
                }
            ],
            [
                {
                    "type": "step",
                    "step": "Take out a piece of paper."
                }
            ],
            [
                {
                    "type": "step",
                    "step": "Pick up a pen."
                }
            ],
            [
                {
                    "type": "step",
                    "step": "Write the letter."
                }
            ],
            [
                {
                    "type": "step",
                    "step": "Fold the paper and put in envelop."
                },
                {
                    "type": "predicted_event",
                    "event": "I still correct a wrong address.",
                    "change": "less likely"
                }
            ],
            [
                {
                    "type": "step",
                    "step": "Put the stamp on."
                }
            ],
            [
                {
                    "type": "step",
                    "step": "Write the friend's information."
                }
            ],
            [
                {
                    "type": "step",
                    "step": "Drop it off in a mailbox."
                },
                {
                    "type": "entity",
                    "entity": "mail",
                    "attribute": "still with me",
                    "change": "less likely"
                },
                {
                    "type": "event",
                    "event": "I still correct a wrong address.",
                    "change": "less likely"
                }
            ]
        ]
    },
    "117": {
        "goal": "Wrap a present for Christmas.",
        "annotator": "yuzhe shi",
        "steps": [
            [
                {
                    "type": "step",
                    "step": "Start."
                }
            ],
            [
                {
                    "type": "step",
                    "step": "Get the wrapping paper."
                }
            ],
            [
                {
                    "type": "step",
                    "step": "Put the gift in the middle evenly."
                }
            ],
            [
                {
                    "type": "step",
                    "step": "Measure twice to make sure you only have to cut once."
                }
            ],
            [
                {
                    "type": "step",
                    "step": "Fold the long sides up and tape in the middle. "
                }
            ],
            [
                {
                    "type": "step",
                    "step": "Crease the corners into the shape of the present. "
                },
                {
                    "type": "predicted_event",
                    "event": "Someone knows what the present is by looking at it.",
                    "change": "less likely"
                }
            ],
            [
                {
                    "type": "step",
                    "step": "Fold the remaining flaps over the creases you just made."
                }
            ],
            [
                {
                    "type": "step",
                    "step": "Tape again and you're done folding."
                },
                {
                    "type": "entity",
                    "entity": "present",
                    "attribute": "inside still visible",
                    "change": "less likely"
                },
                {
                    "type": "event",
                    "event": "Someone knows what the present is by looking at it.",
                    "change": "less likely"
                }
            ],
            [
                {
                    "type": "step",
                    "step": "Add a bow and you are done! "
                }
            ]
        ]
    },
    "122": {
        "goal": "Play with a cat at a friend's house",
        "annotator": "jiayi deng",
        "steps": [
            [
                {
                    "type": "step",
                    "step": "Start."
                }
            ],
            [
                {
                    "type": "step",
                    "step": "Go to the friend's house."
                },
                {
                    "type": "entity",
                    "entity": "I",
                    "attribute": "at the friend's house",
                    "change": "more likely"
                },
                {
                    "type": "event",
                    "event": "I can chat with my friend.",
                    "change": "more likely"
                },
                {
                    "type": "predicted_event",
                    "event": "I can feel the cat's fur.",
                    "change": "more likely"
                }
            ],
            [
                {
                    "type": "step",
                    "step": "Find the cat."
                },
                {
                    "type": "predicted_event",
                    "event": "I can chat with my friend.",
                    "change": "less likely"
                },
                {
                    "type": "predicted_event",
                    "event": "I can feel the cat's fur.",
                    "change": "more likely"
                }
            ],
            [
                {
                    "type": "step",
                    "step": "Pet the cat for 5 minutes."
                },
                {
                    "type": "entity",
                    "entity": "the cat",
                    "attribute": "being petted",
                    "change": "more likely"
                },
                {
                    "type": "event",
                    "event": "I can feel the cat's fur.",
                    "change": "more likely"
                }
            ],
            [
                {
                    "type": "step",
                    "step": "Feed the cat some food."
                },
                {
                    "type": "entity",
                    "entity": "the cat",
                    "attribute": "being petted",
                    "change": "less likely"
                },
                {
                    "type": "event",
                    "event": "I can feel the cat's fur.",
                    "change": "less likely"
                },
                {
                    "type": "predicted_event",
                    "event": "I can chat with my friend.",
                    "change": "more likely"
                }
            ],
            [
                {
                    "type": "step",
                    "step": "Pat the cat for another 5 minutes."
                },
                {
                    "type": "entity",
                    "entity": "the cat",
                    "attribute": "being petted",
                    "change": "more likely"
                },
                {
                    "type": "event",
                    "event": "I can feel the cat's fur.",
                    "change": "more likely"
                }
            ],
            [
                {
                    "type": "step",
                    "step": "Let go of the cat."
                },
                {
                    "type": "entity",
                    "entity": "the cat",
                    "attribute": "being petted",
                    "change": "less likely"
                },
                {
                    "type": "event",
                    "event": "I can feel the cat's fur.",
                    "change": "less likely"
                }
            ]
        ]
    },
    "123": {
        "goal": "Play league of legends with online friends",
        "annotator": "jiayi deng",
        "steps": [
            [
                {
                    "type": "step",
                    "step": "Start."
                }
            ],
            [
                {
                    "type": "step",
                    "step": "Log into the league of legends app."
                },
                {
                    "type": "entity",
                    "entity": "the app",
                    "attribute": "started",
                    "change": "more likely"
                },
                {
                    "type": "event",
                    "event": "The music from the game is playing.",
                    "change": "more likely"
                },
                {
                    "type": "predicted_event",
                    "event": "The music from the game is playing.",
                    "change": "more likely"
                }
            ],
            [
                {
                    "type": "step",
                    "step": "Switch to the discord app."
                },
                {
                    "type": "predicted_event",
                    "event": "The music from the game is playing.",
                    "change": "more likely"
                }
            ],
            [
                {
                    "type": "step",
                    "step": "Type in discord to ask if some friends would like to play league of legends now."
                },
                {
                    "type": "predicted_event",
                    "event": "The music from the game is playing.",
                    "change": "more likely"
                }
            ],
            [
                {
                    "type": "step",
                    "step": "Swtich back to the league of legends app."
                },
                {
                    "type": "predicted_event",
                    "event": "The music from the game is playing.",
                    "change": "more likely"
                }
            ],
            [
                {
                    "type": "step",
                    "step": "Start a game lobby."
                },
                {
                    "type": "predicted_event",
                    "event": "The music from the game is playing.",
                    "change": "more likely"
                }
            ],
            [
                {
                    "type": "step",
                    "step": "Invite friends who've agreed to play into the lobby."
                },
                {
                    "type": "predicted_event",
                    "event": "The music from the game is playing.",
                    "change": "more likely"
                }
            ],
            [
                {
                    "type": "step",
                    "step": "Enter the matching queue to find a game."
                },
                {
                    "type": "predicted_event",
                    "event": "The music from the game is playing.",
                    "change": "more likely"
                }
            ],
            [
                {
                    "type": "step",
                    "step": "Play the game."
                },
                {
                    "type": "predicted_event",
                    "event": "The music from the game is playing.",
                    "change": "more likely"
                }
            ]
        ]
    },
    "127": {
        "goal": "Install Python on a computer",
        "annotator": "jiayi deng",
        "steps": [
            [
                {
                    "type": "step",
                    "step": "Start."
                }
            ],
            [
                {
                    "type": "step",
                    "step": "Google \"python\" and go to the official python website."
                },
                {
                    "type": "predicted_event",
                    "event": "The installer can be run to install python.",
                    "change": "more likely"
                }
            ],
            [
                {
                    "type": "step",
                    "step": "Download the python version for the current machine."
                },
                {
                    "type": "entity",
                    "entity": "python installer",
                    "attribute": "on the computer",
                    "change": "more likely"
                },
                {
                    "type": "event",
                    "event": "The installer can be run to install python.",
                    "change": "more likely"
                },
                {
                    "type": "predicted_event",
                    "event": "The installation took up space in the computer memory.",
                    "change": "more likely"
                },
                {
                    "type": "predicted_event",
                    "event": "I can run Python.",
                    "change": "more likely"
                }
            ],
            [
                {
                    "type": "step",
                    "step": "Double click the download to launch the installer."
                }
            ],
            [
                {
                    "type": "step",
                    "step": "Wait for the installation to complete."
                },
                {
                    "type": "entity",
                    "entity": "python program",
                    "attribute": "being installed",
                    "change": "more likely"
                },
                {
                    "type": "event",
                    "event": "The installation took up space in the computer memory.",
                    "change": "more likely"
                }
            ],
            [
                {
                    "type": "step",
                    "step": "Click \"Finish\" when the installation is successful."
                },
                {
                    "type": "entity",
                    "entity": "python program",
                    "attribute": "fully installed",
                    "change": "more likely"
                },
                {
                    "type": "event",
                    "event": "I can run Python.",
                    "change": "more likely"
                }
            ]
        ]
    },
    "130": {
        "goal": "Make bubble tea at home",
        "annotator": "jiayi deng",
        "steps": [
            [
                {
                    "type": "step",
                    "step": "Start."
                }
            ],
            [
                {
                    "type": "step",
                    "step": "Purchase brown sugar bubbles from an Asian supermarket."
                }
            ],
            [
                {
                    "type": "step",
                    "step": "Purchase milk from any supermarket."
                }
            ],
            [
                {
                    "type": "step",
                    "step": "Put one cup of bubbles in a bowl."
                }
            ],
            [
                {
                    "type": "step",
                    "step": "Microwave the bubbles on high for 2 minutes."
                },
                {
                    "type": "entity",
                    "entity": "the bowl",
                    "attribute": "hot",
                    "change": "more likely"
                },
                {
                    "type": "event",
                    "event": "I should be careful when touching the bowl.",
                    "change": "more likely"
                }
            ],
            [
                {
                    "type": "step",
                    "step": "Pour the bubbles into a cup."
                },
                {
                    "type": "predicted_event",
                    "event": "I should be careful when touching the bowl.",
                    "change": "more likely"
                },
                {
                    "type": "predicted_event",
                    "event": "If I drink the milk, it's likely I also drink the bubbles.",
                    "change": "more likely"
                }
            ],
            [
                {
                    "type": "step",
                    "step": "Pour milk into the same cup until the cup is filled."
                },
                {
                    "type": "entity",
                    "entity": "milk and bubbles",
                    "attribute": "mixed",
                    "change": "more likely"
                },
                {
                    "type": "event",
                    "event": "If I drink the milk, it's likely I also drink the bubbles.",
                    "change": "more likely"
                }
            ]
        ]
    },
    "133": {
        "goal": "Paint a picture",
        "annotator": "sheena satpute",
        "steps": [
            [
                {
                    "type": "step",
                    "step": "Start."
                }
            ],
            [
                {
                    "type": "step",
                    "step": "Prepare your painting space"
                },
                {
                    "type": "predicted_event",
                    "event": "I will ruin the painting by touching it.",
                    "change": "more likely"
                }
            ],
            [
                {
                    "type": "step",
                    "step": "Sketch out your painting with a pencil"
                },
                {
                    "type": "entity",
                    "entity": "sketch paper",
                    "attribute": "painted",
                    "change": "more likely"
                },
                {
                    "type": "event",
                    "event": "The sketch paper is blank.",
                    "change": "less likely"
                }
            ],
            [
                {
                    "type": "step",
                    "step": "Mix the colors as you need them"
                }
            ],
            [
                {
                    "type": "step",
                    "step": "Practice using the brush"
                }
            ],
            [
                {
                    "type": "step",
                    "step": "Paint the background"
                },
                {
                    "type": "entity",
                    "entity": "canvas",
                    "attribute": "wet",
                    "change": "more likely"
                },
                {
                    "type": "event",
                    "event": "I will ruin the painting by touching it.",
                    "change": "more likely"
                },
                {
                    "type": "predicted_event",
                    "event": "The sketch paper is blank.",
                    "change": "less likely"
                }
            ],
            [
                {
                    "type": "step",
                    "step": "Paint the subjects "
                }
            ],
            [
                {
                    "type": "step",
                    "step": "Let the paint dry"
                },
                {
                    "type": "entity",
                    "entity": "canvas",
                    "attribute": "wet",
                    "change": "less likely"
                },
                {
                    "type": "event",
                    "event": "I will ruin the painting by touching it.",
                    "change": "less likely"
                }
            ],
            [
                {
                    "type": "step",
                    "step": "Hang up on a wall"
                }
            ]
        ]
    },
    "134": {
        "goal": "Unlock iPhone",
        "annotator": "sheena satpute",
        "steps": [
            [
                {
                    "type": "step",
                    "step": "Start."
                }
            ],
            [
                {
                    "type": "step",
                    "step": "Turn on phone"
                }
            ],
            [
                {
                    "type": "step",
                    "step": "Press the right unlock button on iPhone"
                },
                {
                    "type": "predicted_event",
                    "event": "I make a phone call using my phone.",
                    "change": "more likely"
                }
            ],
            [
                {
                    "type": "step",
                    "step": "Use your face identification to unlock"
                },
                {
                    "type": "entity",
                    "entity": "phone",
                    "attribute": "unlocked",
                    "change": "more likely"
                },
                {
                    "type": "event",
                    "event": "I make a phone call using my phone.",
                    "change": "more likely"
                }
            ]
        ]
    },
    "136": {
        "goal": "Braid Hair",
        "annotator": "sheena satpute",
        "steps": [
            [
                {
                    "type": "step",
                    "step": "Start."
                }
            ],
            [
                {
                    "type": "step",
                    "step": "Brush hair out"
                },
                {
                    "type": "entity",
                    "entity": "hair",
                    "attribute": "messy",
                    "change": "less likely"
                }
            ],
            [
                {
                    "type": "step",
                    "step": "Start with secure base"
                }
            ],
            [
                {
                    "type": "step",
                    "step": "Divide hair into three even sections"
                }
            ],
            [
                {
                    "type": "step",
                    "step": "Cross left section over middle section"
                }
            ],
            [
                {
                    "type": "step",
                    "step": "Cross right section over middle section"
                }
            ],
            [
                {
                    "type": "step",
                    "step": "Continue braiding in this manner"
                },
                {
                    "type": "predicted_event",
                    "event": "I can easily mess my hair up.",
                    "change": "less likely"
                }
            ],
            [
                {
                    "type": "step",
                    "step": "Tye your braid with a hair tie"
                },
                {
                    "type": "entity",
                    "entity": "braid",
                    "attribute": "secured",
                    "change": "more likely"
                },
                {
                    "type": "event",
                    "event": "I can easily mess my hair up.",
                    "change": "less likely"
                }
            ],
            [
                {
                    "type": "step",
                    "step": "Set the braid with hairspray"
                },
                {
                    "type": "entity",
                    "entity": "braid",
                    "attribute": "secured",
                    "change": "more likely"
                },
                {
                    "type": "event",
                    "event": "I can easily mess my hair up.",
                    "change": "more likely"
                }
            ]
        ]
    },
    "137": {
        "goal": "Putting on Contact Lenses",
        "annotator": "sheena satpute",
        "steps": [
            [
                {
                    "type": "step",
                    "step": "Start."
                }
            ],
            [
                {
                    "type": "step",
                    "step": "Wash your hands"
                }
            ],
            [
                {
                    "type": "step",
                    "step": "Remove the lid on one side of your contact lens case and set it aside"
                },
                {
                    "type": "predicted_event",
                    "event": "I can put contact lenses into the case",
                    "change": "less likely"
                }
            ],
            [
                {
                    "type": "step",
                    "step": "Use your fingertip to slide the contact lens from the case"
                },
                {
                    "type": "entity",
                    "entity": "contact lens case",
                    "attribute": "occupied",
                    "change": "less likely"
                },
                {
                    "type": "event",
                    "event": "I can put contact lenses into the case",
                    "change": "more likely"
                }
            ],
            [
                {
                    "type": "step",
                    "step": "Rinse the contact lens with your contact solution"
                },
                {
                    "type": "predicted_event",
                    "event": "I can see things from distance.",
                    "change": "more likely"
                }
            ],
            [
                {
                    "type": "step",
                    "step": "Place the contact concave side up on your index finger"
                }
            ],
            [
                {
                    "type": "step",
                    "step": "Hold your eye open with your middle finger and opposite hand"
                }
            ],
            [
                {
                    "type": "step",
                    "step": "Move the contact towards your eye calmly and steadily"
                }
            ],
            [
                {
                    "type": "step",
                    "step": "Place the contact on your iris gently"
                },
                {
                    "type": "entity",
                    "entity": "eye",
                    "attribute": "wearing context lenses",
                    "change": "more likely"
                },
                {
                    "type": "event",
                    "event": "I can see things from distance.",
                    "change": "more likely"
                }
            ],
            [
                {
                    "type": "step",
                    "step": "Repeat the process with the other contact"
                },
                {
                    "type": "entity",
                    "entity": "eye",
                    "attribute": "wearing context lenses",
                    "change": "more likely"
                },
                {
                    "type": "entity",
                    "entity": "contact lens case",
                    "attribute": "occupied",
                    "change": "less likely"
                },
                {
                    "type": "event",
                    "event": "I can put contact lenses into the case",
                    "change": "more likely"
                },
                {
                    "type": "event",
                    "event": "I can see things from distance.",
                    "change": "more likely"
                }
            ],
            [
                {
                    "type": "step",
                    "step": "Wash your hands"
                }
            ]
        ]
    },
    "138": {
        "goal": "Make French Fries",
        "annotator": "sheena satpute",
        "steps": [
            [
                {
                    "type": "step",
                    "step": "Start."
                }
            ],
            [
                {
                    "type": "step",
                    "step": "Preheat oven to 425 degrees"
                },
                {
                    "type": "entity",
                    "entity": "oven",
                    "attribute": "heated",
                    "change": "more likely"
                },
                {
                    "type": "event",
                    "event": "I can touch the inside of the oven with bare hands.",
                    "change": "less likely"
                }
            ],
            [
                {
                    "type": "step",
                    "step": "Peel Potatoes"
                }
            ],
            [
                {
                    "type": "step",
                    "step": "Cut potatoes into 1/2 inch"
                },
                {
                    "type": "predicted_event",
                    "event": "I can touch the inside of the oven with bare hands.",
                    "change": "less likely"
                },
                {
                    "type": "predicted_event",
                    "event": "the potatoes are savory.",
                    "change": "more likely"
                }
            ],
            [
                {
                    "type": "step",
                    "step": "Toss potatoes with olive oil and salt"
                },
                {
                    "type": "entity",
                    "entity": "potatoes",
                    "attribute": "seasoned",
                    "change": "more likely"
                },
                {
                    "type": "event",
                    "event": "the potatoes are savory.",
                    "change": "more likely"
                }
            ],
            [
                {
                    "type": "step",
                    "step": "Arrange fries on baking sheet"
                }
            ],
            [
                {
                    "type": "step",
                    "step": "Bake fries for 40-50 minutes"
                }
            ],
            [
                {
                    "type": "step",
                    "step": "Remove fries and season them"
                },
                {
                    "type": "entity",
                    "entity": "potatoes",
                    "attribute": "seasoned",
                    "change": "more likely"
                },
                {
                    "type": "event",
                    "event": "the potatoes are savory.",
                    "change": "more likely"
                }
            ]
        ]
    },
    "139": {
        "goal": "Tie a shoe",
        "annotator": "sheena satpute",
        "steps": [
            [
                {
                    "type": "step",
                    "step": "Start."
                }
            ],
            [
                {
                    "type": "step",
                    "step": "Place shoe on flat surface"
                }
            ],
            [
                {
                    "type": "step",
                    "step": "Make a loop with one of the laces"
                },
                {
                    "type": "predicted_event",
                    "event": "I can run with the shoes securely on my feet.",
                    "change": "more likely"
                }
            ],
            [
                {
                    "type": "step",
                    "step": "Use your other hand to wrap the other lace around the loop"
                }
            ],
            [
                {
                    "type": "step",
                    "step": "Pull the shoelace through the hole to form another loop"
                }
            ],
            [
                {
                    "type": "step",
                    "step": "Hold both loops and pull them tight"
                },
                {
                    "type": "entity",
                    "entity": "shoelace",
                    "attribute": "tighten",
                    "change": "more likely"
                },
                {
                    "type": "event",
                    "event": "I can run with the shoes securely on my feet.",
                    "change": "more likely"
                }
            ],
            [
                {
                    "type": "step",
                    "step": "Do it on the other shoe"
                },
                {
                    "type": "entity",
                    "entity": "shoelace",
                    "attribute": "tighten",
                    "change": "more likely"
                },
                {
                    "type": "event",
                    "event": "I can run with the shoes securely on my feet.",
                    "change": "more likely"
                }
            ],
            [
                {
                    "type": "step",
                    "step": "Start walking"
                }
            ]
        ]
    },
    "143": {
        "goal": "Make macaroni and cheese",
        "annotator": "anuj krishnamurthy",
        "steps": [
            [
                {
                    "type": "step",
                    "step": "Start."
                }
            ],
            [
                {
                    "type": "step",
                    "step": "Get a pot."
                },
                {
                    "type": "predicted_event",
                    "event": "I can clean the pot right now.",
                    "change": "more likely"
                }
            ],
            [
                {
                    "type": "step",
                    "step": "Put the pot onto the kitchen stove."
                },
                {
                    "type": "entity",
                    "entity": "the stove",
                    "attribute": "in use",
                    "change": "more likely"
                },
                {
                    "type": "event",
                    "event": "I can clean the stove right now.",
                    "change": "less likely"
                }
            ],
            [
                {
                    "type": "step",
                    "step": "Pour water into the pot."
                },
                {
                    "type": "entity",
                    "entity": "the pot",
                    "attribute": "in use",
                    "change": "more likely"
                },
                {
                    "type": "event",
                    "event": "I can clean the pot right now.",
                    "change": "less likely"
                }
            ],
            [
                {
                    "type": "step",
                    "step": "Heat the water until it is boiling."
                }
            ],
            [
                {
                    "type": "step",
                    "step": "Put macaroni into the pot."
                }
            ],
            [
                {
                    "type": "step",
                    "step": "Take the macaroni out once it is cooked."
                },
                {
                    "type": "entity",
                    "entity": "the pot",
                    "attribute": "in use",
                    "change": "less likely"
                },
                {
                    "type": "entity",
                    "entity": "the stove",
                    "attribute": "in use",
                    "change": "less likely"
                },
                {
                    "type": "event",
                    "event": "I can clean the pot right now.",
                    "change": "more likely"
                },
                {
                    "type": "event",
                    "event": "I can clean the stove right now.",
                    "change": "more likely"
                },
                {
                    "type": "predicted_event",
                    "event": "I can wash the saucepan right now.",
                    "change": "more likely"
                }
            ],
            [
                {
                    "type": "step",
                    "step": "Put the macaroni into a saucepan."
                },
                {
                    "type": "entity",
                    "entity": "saucepan",
                    "attribute": "in use",
                    "change": "more likely"
                },
                {
                    "type": "event",
                    "event": "I can wash the saucepan right now.",
                    "change": "less likely"
                }
            ],
            [
                {
                    "type": "step",
                    "step": "Put some cheese on top of the macaroni."
                }
            ],
            [
                {
                    "type": "step",
                    "step": "Stir vigorously."
                }
            ],
            [
                {
                    "type": "step",
                    "step": "Make sure the cheese is melted."
                }
            ],
            [
                {
                    "type": "step",
                    "step": "Eat the macaroni and cheese."
                },
                {
                    "type": "entity",
                    "entity": "saucepan",
                    "attribute": "in use",
                    "change": "less likely"
                }
            ]
        ]
    },
    "150": {
        "goal": "Play pickup basketball",
        "annotator": "anuj krishnamurthy",
        "steps": [
            [
                {
                    "type": "step",
                    "step": "Start."
                }
            ],
            [
                {
                    "type": "step",
                    "step": "Put on some sneakers."
                }
            ],
            [
                {
                    "type": "step",
                    "step": "Go to the local basketball courts."
                },
                {
                    "type": "predicted_event",
                    "event": "I can play against other team now.",
                    "change": "more likely"
                }
            ],
            [
                {
                    "type": "step",
                    "step": "Ask people around the court if you can play."
                }
            ],
            [
                {
                    "type": "step",
                    "step": "Get on a team."
                },
                {
                    "type": "entity",
                    "entity": "basketball team",
                    "attribute": "formed",
                    "change": "more likely"
                },
                {
                    "type": "event",
                    "event": "I can play against other team now.",
                    "change": "more likely"
                },
                {
                    "type": "predicted_event",
                    "event": "I can play against other team now.",
                    "change": "less likely"
                }
            ],
            [
                {
                    "type": "step",
                    "step": "Play a game of basketball."
                }
            ],
            [
                {
                    "type": "step",
                    "step": "Drink some water to hydrate in between games."
                }
            ]
        ]
    },
    "151": {
        "goal": "Melt sugar",
        "annotator": "Cheng Cheng",
        "steps": [
            [
                {
                    "step": "Start"
                }
            ],
            [
                {
                    "type": "step",
                    "step": "Measure out the sugar"
                }
            ],
            [
                {
                    "type": "step",
                    "step": "Place the sugar and cold water in a heavy-bottomed pot"
                },
                {
                    "type": "entity",
                    "entity": "sugar",
                    "attribute": "melted",
                    "change": "more likely"
                },
                {
                    "type": "event",
                    "event": "I can put the sugar back to the container.",
                    "change": "less likely"
                }
            ],
            [
                {
                    "type": "step",
                    "step": "Place the pot on the stove over medium low heat"
                }
            ],
            [
                {
                    "type": "step",
                    "step": "Stir contniuously until the sugar is dissolved"
                },
                {
                    "type": "entity",
                    "entity": "sugar",
                    "attribute": "melted",
                    "change": "more likely"
                },
                {
                    "type": "event",
                    "event": "I can put the sugar back to the container.",
                    "change": "less likely"
                }
            ],
            [
                {
                    "type": "step",
                    "step": "Cook for 8 to 10 more minutes without stirring"
                },
                {
                    "type": "entity",
                    "entity": "sugar",
                    "attribute": "melted",
                    "change": "more likely"
                },
                {
                    "type": "entity",
                    "entity": "sugar",
                    "attribute": "turned brown",
                    "change": "more likely"
                }
            ],
            [
                {
                    "type": "step",
                    "step": "Check the temperature of the sugar with a candy thermometer"
                },
                {
                    "type": "event",
                    "event": "I make caramel saurce with melted sugar now.",
                    "change": "more likely"
                },
                {
                    "type": "predicted_event",
                    "event": "I can put the sugar back to the container.",
                    "change": "less likely"
                },
                {
                    "type": "predicted_event",
                    "event": "I make caramel saurce with melted sugar now.",
                    "change": "more likely"
                }
            ]
        ]
    },
    "153": {
        "goal": "Write a book report",
        "annotator": "Cheng Cheng",
        "steps": [
            [
                {
                    "step": "Start"
                }
            ],
            [
                {
                    "type": "step",
                    "step": "Follow the requirements of your assignment"
                }
            ],
            [
                {
                    "type": "step",
                    "step": "Read the entire book"
                },
                {
                    "type": "predicted_event",
                    "event": "Readers learn about the protangonist from the report.",
                    "change": "more likely"
                }
            ],
            [
                {
                    "type": "step",
                    "step": "Take careful notes"
                },
                {
                    "type": "predicted_event",
                    "event": "Readers learn about the antangonist from the report.",
                    "change": "more likely"
                }
            ],
            [
                {
                    "type": "step",
                    "step": "Create an outline"
                }
            ],
            [
                {
                    "type": "step",
                    "step": "Open with an informative intro paragraph"
                }
            ],
            [
                {
                    "type": "step",
                    "step": "Describe the book's setting"
                }
            ],
            [
                {
                    "type": "step",
                    "step": "Include a general plot summary"
                }
            ],
            [
                {
                    "type": "step",
                    "step": "Introduce any main characters"
                },
                {
                    "type": "entity",
                    "entity": "main characters",
                    "attribute": "included in the report",
                    "change": "more likely"
                },
                {
                    "type": "event",
                    "event": "Readers learn about the protangonist from the report.",
                    "change": "more likely"
                },
                {
                    "type": "event",
                    "event": "Readers learn about the antangonist from the report.",
                    "change": "more likely"
                }
            ],
            [
                {
                    "type": "step",
                    "step": "Examine any main themes or arguments in your body paragraph"
                }
            ],
            [
                {
                    "type": "step",
                    "step": "Comment on the writnig style and tone"
                }
            ],
            [
                {
                    "type": "step",
                    "step": "Write a concise conclusion"
                }
            ],
            [
                {
                    "type": "step",
                    "step": "Polish your final report"
                }
            ]
        ]
    },
    "155": {
        "goal": "Wash dirty clothes by hand",
        "annotator": "Cheng Cheng",
        "steps": [
            [
                {
                    "step": "Start"
                }
            ],
            [
                {
                    "type": "step",
                    "step": "Separate the white and colored clothing"
                }
            ],
            [
                {
                    "type": "step",
                    "step": "Lay the clothes in a clean container"
                }
            ],
            [
                {
                    "type": "step",
                    "step": "Treat serious stains with a pre-wash stain remover or soap"
                },
                {
                    "type": "entity",
                    "entity": "clothes",
                    "attribute": "wet",
                    "change": "more likely"
                },
                {
                    "type": "event",
                    "event": "I can put clothes directly back to the clothet.",
                    "change": "less likely"
                }
            ],
            [
                {
                    "type": "step",
                    "step": "Fill the bucket with lukewarm water"
                },
                {
                    "type": "entity",
                    "entity": "clothes",
                    "attribute": "wet",
                    "change": "more likely"
                },
                {
                    "type": "event",
                    "event": "I can put clothes directly back to the clothet.",
                    "change": "less likely"
                }
            ],
            [
                {
                    "type": "step",
                    "step": "Add laundry dtergent"
                }
            ],
            [
                {
                    "type": "step",
                    "step": "Let the clothing soak"
                }
            ],
            [
                {
                    "type": "step",
                    "step": "Swish the clothing around in the water"
                },
                {
                    "type": "predicted_event",
                    "event": "I can put clothes directly back to the clothet.",
                    "change": "less likely"
                }
            ],
            [
                {
                    "type": "step",
                    "step": "Rinse repeatedly in new, cool water"
                }
            ],
            [
                {
                    "type": "step",
                    "step": "Wring and dry the clothing"
                },
                {
                    "type": "entity",
                    "entity": "clothes",
                    "attribute": "wet",
                    "change": "less likely"
                },
                {
                    "type": "event",
                    "event": "I can put clothes directly back to the clothet.",
                    "change": "more likely"
                }
            ]
        ]
    },
    "156": {
        "goal": "Make peanut-butter and jelly sandwhich",
        "annotator": "aviv maman",
        "steps": [
            [
                {
                    "type": "step",
                    "step": "Start."
                }
            ],
            [
                {
                    "type": "step",
                    "step": "Take two slices of bread."
                },
                {
                    "type": "predicted_event",
                    "event": "I can taste peanut-butter from the bread.",
                    "change": "more likely"
                }
            ],
            [
                {
                    "type": "step",
                    "step": "Spread peanut-butter on one slice."
                },
                {
                    "type": "entity",
                    "entity": "bread",
                    "attribute": "peanut-butter spreaded",
                    "change": "more likely"
                },
                {
                    "type": "event",
                    "event": "I can taste peanut-butter from the bread.",
                    "change": "more likely"
                },
                {
                    "type": "predicted_event",
                    "event": "I can taste jelly from the bread.",
                    "change": "more likely"
                }
            ],
            [
                {
                    "type": "step",
                    "step": "Spread jelly on the other slice."
                },
                {
                    "type": "entity",
                    "entity": "bread",
                    "attribute": "jelly spreaded",
                    "change": "more likely"
                },
                {
                    "type": "event",
                    "event": "I can taste jelly from the bread.",
                    "change": "more likely"
                }
            ],
            [
                {
                    "type": "step",
                    "step": "Combine slices."
                }
            ]
        ]
    },
    "157": {
        "goal": "Do a bicep curl",
        "annotator": "aviv maman",
        "steps": [
            [
                {
                    "type": "step",
                    "step": "Start."
                }
            ],
            [
                {
                    "type": "step",
                    "step": "Select the apropriate weight for the dumbell."
                }
            ],
            [
                {
                    "type": "step",
                    "step": "Hold dumbell with straight arm alongside the body."
                }
            ],
            [
                {
                    "type": "step",
                    "step": "Fold arm at elbow bringing dumbell to shoulder."
                },
                {
                    "type": "entity",
                    "entity": "arm",
                    "attribute": "folded with dumbell",
                    "change": "more likely"
                },
                {
                    "type": "event",
                    "event": "The bicep muscle is pumped at the moment.",
                    "change": "more likely"
                },
                {
                    "type": "predicted_event",
                    "event": "The bicep muscle is pumped at the moment.",
                    "change": "more likely"
                }
            ],
            [
                {
                    "type": "step",
                    "step": "Lower dumbell to starting position. "
                },
                {
                    "type": "entity",
                    "entity": "arm",
                    "attribute": "folded with dumbell",
                    "change": "less likely"
                },
                {
                    "type": "event",
                    "event": "The bicep muscle is pumped at the moment.",
                    "change": "less likely"
                }
            ]
        ]
    },
    "159": {
        "goal": "Fill up gas in car",
        "annotator": "aviv maman",
        "steps": [
            [
                {
                    "type": "step",
                    "step": "Start."
                }
            ],
            [
                {
                    "type": "step",
                    "step": "Pop the gas cover."
                },
                {
                    "type": "entity",
                    "entity": "gas cover",
                    "attribute": "open",
                    "change": "more likely"
                },
                {
                    "type": "event",
                    "event": "I can unscrew the gas cap now.",
                    "change": "more likely"
                },
                {
                    "type": "predicted_event",
                    "event": "I can unscrew the gas cap now.",
                    "change": "more likely"
                }
            ],
            [
                {
                    "type": "step",
                    "step": "Unscrew the gas cap."
                },
                {
                    "type": "entity",
                    "entity": "gas cap",
                    "attribute": "open",
                    "change": "more likely"
                },
                {
                    "type": "event",
                    "event": "I can see the gas hole now.",
                    "change": "more likely"
                },
                {
                    "type": "predicted_event",
                    "event": "I can see the gas hole now.",
                    "change": "more likely"
                }
            ],
            [
                {
                    "type": "step",
                    "step": "Unhook the gas hose."
                },
                {
                    "type": "predicted_event",
                    "event": "I can start pumping fuel into the car.",
                    "change": "more likely"
                }
            ],
            [
                {
                    "type": "step",
                    "step": "Insert nossle into gas hole."
                },
                {
                    "type": "entity",
                    "entity": "nossle",
                    "attribute": "in gas tank",
                    "change": "more likely"
                },
                {
                    "type": "event",
                    "event": "I can start pumping fuel into the car.",
                    "change": "more likely"
                },
                {
                    "type": "predicted_event",
                    "event": "I can start pumping fuel into the car.",
                    "change": "less likely"
                }
            ],
            [
                {
                    "type": "step",
                    "step": "Squeeze trigger to start flow."
                },
                {
                    "type": "predicted_event",
                    "event": "I can see the gas hole now.",
                    "change": "less likely"
                }
            ],
            [
                {
                    "type": "step",
                    "step": "Release trigger to stop gas flow."
                },
                {
                    "type": "predicted_event",
                    "event": "I can unscrew the gas cap now.",
                    "change": "less likely"
                }
            ],
            [
                {
                    "type": "step",
                    "step": "Return hose to place."
                }
            ],
            [
                {
                    "type": "step",
                    "step": "Screw gas cap."
                },
                {
                    "type": "entity",
                    "entity": "gas cap",
                    "attribute": "open",
                    "change": "less likely"
                },
                {
                    "type": "entity",
                    "entity": "nossle",
                    "attribute": "in gas tank",
                    "change": "less likely"
                },
                {
                    "type": "event",
                    "event": "I can see the gas hole now.",
                    "change": "less likely"
                },
                {
                    "type": "event",
                    "event": "I can start pumping fuel into the car.",
                    "change": "less likely"
                }
            ],
            [
                {
                    "type": "step",
                    "step": "Close gas cover."
                },
                {
                    "type": "entity",
                    "entity": "gas cover",
                    "attribute": "open",
                    "change": "less likely"
                },
                {
                    "type": "event",
                    "event": "I can unscrew the gas cap now.",
                    "change": "less likely"
                }
            ]
        ]
    },
    "161": {
        "goal": "Set up a monitor for a computer",
        "annotator": "aviv maman",
        "steps": [
            [
                {
                    "type": "step",
                    "step": "Start."
                }
            ],
            [
                {
                    "type": "step",
                    "step": "Set monitor on flat surface."
                },
                {
                    "type": "predicted_event",
                    "event": "I can turn on the monitor",
                    "change": "more likely"
                }
            ],
            [
                {
                    "type": "step",
                    "step": "Connect monitor to an outlet with the power cable."
                },
                {
                    "type": "entity",
                    "entity": "monitor",
                    "attribute": "connected to an outlet",
                    "change": "more likely"
                },
                {
                    "type": "event",
                    "event": "I can turn on the monitor",
                    "change": "more likely"
                },
                {
                    "type": "predicted_event",
                    "event": "I can turn on the monitor",
                    "change": "more likely"
                }
            ],
            [
                {
                    "type": "step",
                    "step": "Connect the monitor to the computer with the provided cable."
                },
                {
                    "type": "predicted_event",
                    "event": "I can turn on the monitor",
                    "change": "more likely"
                }
            ],
            [
                {
                    "type": "step",
                    "step": "Power up the monitor."
                }
            ],
            [
                {
                    "type": "step",
                    "step": "Power up the computer."
                }
            ],
            [
                {
                    "type": "step",
                    "step": "Make sure the right input device is selected."
                }
            ]
        ]
    },
    "162": {
        "goal": "Make instant coffee",
        "annotator": "aviv maman",
        "steps": [
            [
                {
                    "type": "step",
                    "step": "Start."
                }
            ],
            [
                {
                    "type": "step",
                    "step": "Add desired amount of instant coffee into a mug."
                },
                {
                    "type": "entity",
                    "entity": "mug",
                    "attribute": "contains coffee",
                    "change": "more likely"
                },
                {
                    "type": "event",
                    "event": "I can put the mug in dish washer.",
                    "change": "less likely"
                }
            ],
            [
                {
                    "type": "step",
                    "step": "Pour hot water into mug."
                },
                {
                    "type": "entity",
                    "entity": "coffee",
                    "attribute": "made",
                    "change": "more likely"
                },
                {
                    "type": "event",
                    "event": "I can drink the coffee.",
                    "change": "more likely"
                }
            ],
            [
                {
                    "type": "step",
                    "step": "Pour desired amount of milk into mug."
                },
                {
                    "type": "entity",
                    "entity": "coffee",
                    "attribute": "made",
                    "change": "more likely"
                },
                {
                    "type": "event",
                    "event": "I can drink the coffee.",
                    "change": "more likely"
                }
            ],
            [
                {
                    "type": "step",
                    "step": "Stir."
                },
                {
                    "type": "predicted_event",
                    "event": "I can drink the coffee.",
                    "change": "more likely"
                }
            ]
        ]
    },
    "163": {
        "goal": "Write a program in python",
        "annotator": "aviv maman",
        "steps": [
            [
                {
                    "type": "step",
                    "step": "Start."
                }
            ],
            [
                {
                    "type": "step",
                    "step": "Open a new file in your editor."
                },
                {
                    "type": "predicted_event",
                    "event": "I can use the code.",
                    "change": "more likely"
                }
            ],
            [
                {
                    "type": "step",
                    "step": "Write code."
                },
                {
                    "type": "entity",
                    "entity": "the code",
                    "attribute": "finished",
                    "change": "more likely"
                },
                {
                    "type": "event",
                    "event": "I can use the code.",
                    "change": "more likely"
                }
            ],
            [
                {
                    "type": "step",
                    "step": "Debug if neeeded."
                },
                {
                    "type": "entity",
                    "entity": "the code",
                    "attribute": "finished",
                    "change": "more likely"
                },
                {
                    "type": "event",
                    "event": "I can use the code.",
                    "change": "more likely"
                },
                {
                    "type": "predicted_event",
                    "event": "I can use the code.",
                    "change": "more likely"
                }
            ]
        ]
    },
    "164": {
        "goal": "How to make hard boiled eggs",
        "annotator": "aviv maman",
        "steps": [
            [
                {
                    "type": "step",
                    "step": "Start."
                }
            ],
            [
                {
                    "type": "step",
                    "step": "Add the eggs to a saucepan and cover with water."
                }
            ],
            [
                {
                    "type": "step",
                    "step": "Bring to a rolling boil."
                },
                {
                    "type": "entity",
                    "entity": "the eggs",
                    "attribute": "hot",
                    "change": "more likely"
                },
                {
                    "type": "entity",
                    "entity": "the eggs",
                    "attribute": "hard-boiled",
                    "change": "more likely"
                },
                {
                    "type": "event",
                    "event": "I can eat the egg without burning my mouth.",
                    "change": "less likely"
                },
                {
                    "type": "event",
                    "event": "I can make salad with the eggs",
                    "change": "more likely"
                }
            ],
            [
                {
                    "type": "step",
                    "step": "After 11 minutes turn off the heat, cover, and let sit."
                },
                {
                    "type": "entity",
                    "entity": "the eggs",
                    "attribute": "hot",
                    "change": "more likely"
                },
                {
                    "type": "entity",
                    "entity": "the eggs",
                    "attribute": "hard-boiled",
                    "change": "more likely"
                },
                {
                    "type": "event",
                    "event": "I can eat the egg without burning my mouth.",
                    "change": "less likely"
                },
                {
                    "type": "event",
                    "event": "I can make salad with the eggs",
                    "change": "more likely"
                }
            ],
            [
                {
                    "type": "step",
                    "step": "Strain and run under cold water."
                },
                {
                    "type": "entity",
                    "entity": "the eggs",
                    "attribute": "hot",
                    "change": "less likely"
                },
                {
                    "type": "event",
                    "event": "I can eat the egg without burning my mouth.",
                    "change": "more likely"
                }
            ]
        ]
    },
    "165": {
        "goal": "Light a candle",
        "annotator": "aviv maman",
        "steps": [
            [
                {
                    "type": "step",
                    "step": "Start."
                }
            ],
            [
                {
                    "type": "step",
                    "step": "Set candle in upright position."
                }
            ],
            [
                {
                    "type": "step",
                    "step": "Use a lighter or match and ignite. "
                },
                {
                    "type": "predicted_event",
                    "event": "the room is very dark",
                    "change": "less likely"
                }
            ],
            [
                {
                    "type": "step",
                    "step": "Using lighter or match to light the candle wick."
                },
                {
                    "type": "entity",
                    "entity": "candle",
                    "attribute": "lighted",
                    "change": "more likely"
                },
                {
                    "type": "event",
                    "event": "the room is very dark",
                    "change": "less likely"
                }
            ],
            [
                {
                    "type": "step",
                    "step": "Make sure fire has caught onto wick."
                }
            ]
        ]
    },
    "166": {
        "goal": "Straighten hair",
        "annotator": "Jihong Liang",
        "steps": [
            [
                {
                    "type": "step",
                    "step": "Start."
                }
            ],
            [
                {
                    "type": "step",
                    "step": "Plug in the straightening iron."
                },
                {
                    "type": "entity",
                    "entity": "straightening iron",
                    "attribute": "plugged in",
                    "change": "more likely"
                },
                {
                    "type": "event",
                    "event": "The straightening iron can be powered on.",
                    "change": "more likely"
                },
                {
                    "type": "predicted_event",
                    "event": "The straightening iron can be powered on.",
                    "change": "more likely"
                }
            ],
            [
                {
                    "type": "step",
                    "step": "Wait for the straightening iron to heat up."
                },
                {
                    "type": "entity",
                    "entity": "straightening iron",
                    "attribute": "heated",
                    "change": "more likely"
                },
                {
                    "type": "event",
                    "event": "Hair can be straightened by the straightening iron.",
                    "change": "more likely"
                }
            ],
            [
                {
                    "type": "step",
                    "step": "Section my hair."
                },
                {
                    "type": "predicted_event",
                    "event": "Hair can be straightened by the straightening iron.",
                    "change": "more likely"
                }
            ],
            [
                {
                    "type": "step",
                    "step": "Iron each section."
                }
            ],
            [
                {
                    "type": "step",
                    "step": "Turn off the straightening iron."
                },
                {
                    "type": "entity",
                    "entity": "straightening iron",
                    "attribute": "heated",
                    "change": "less likely"
                },
                {
                    "type": "event",
                    "event": "Hair can be straightened by the straightening iron.",
                    "change": "less likely"
                },
                {
                    "type": "predicted_event",
                    "event": "The straightening iron can be powered on.",
                    "change": "less likely"
                }
            ],
            [
                {
                    "type": "step",
                    "step": "Unplug the straightening iron."
                },
                {
                    "type": "entity",
                    "entity": "straightening iron",
                    "attribute": "plugged in",
                    "change": "less likely"
                },
                {
                    "type": "entity",
                    "entity": "straightening iron",
                    "attribute": "heated",
                    "change": "less likely"
                },
                {
                    "type": "event",
                    "event": "Hair can be straightened by the straightening iron.",
                    "change": "less likely"
                },
                {
                    "type": "event",
                    "event": "The straightening iron can be powered on.",
                    "change": "less likely"
                }
            ]
        ]
    },
    "167": {
        "goal": "Drive to work",
        "annotator": "Jihong Liang",
        "steps": [
            [
                {
                    "type": "step",
                    "step": "Start."
                }
            ],
            [
                {
                    "type": "step",
                    "step": "The empoyee gets into the car."
                },
                {
                    "type": "entity",
                    "entity": "car",
                    "attribute": "ignited",
                    "change": "more likely"
                },
                {
                    "type": "event",
                    "event": "The car can be locked from outside now.",
                    "change": "less likely"
                },
                {
                    "type": "predicted_event",
                    "event": "The car can be locked from outside now.",
                    "change": "less likely"
                }
            ],
            [
                {
                    "type": "step",
                    "step": "The employee starts the car engine."
                }
            ],
            [
                {
                    "type": "step",
                    "step": "The employee drives towards the office."
                },
                {
                    "type": "entity",
                    "entity": "the employee",
                    "attribute": "getting near to the office",
                    "change": "more likely"
                },
                {
                    "type": "event",
                    "event": "The employee is more likely to run across his colleague.",
                    "change": "more likely"
                }
            ],
            [
                {
                    "type": "step",
                    "step": "The empoyee parks the car and head to the elevator."
                },
                {
                    "type": "entity",
                    "entity": "car",
                    "attribute": "ignited",
                    "change": "less likely"
                },
                {
                    "type": "entity",
                    "entity": "the employee",
                    "attribute": "getting near to the office",
                    "change": "more likely"
                },
                {
                    "type": "event",
                    "event": "The employee is more likely to run across his colleague.",
                    "change": "more likely"
                },
                {
                    "type": "event",
                    "event": "The car can be locked from outside now.",
                    "change": "more likely"
                },
                {
                    "type": "predicted_event",
                    "event": "The employee is more likely to run across his colleague.",
                    "change": "more likely"
                }
            ],
            [
                {
                    "type": "step",
                    "step": "Go through reception area."
                },
                {
                    "type": "entity",
                    "entity": "the employee",
                    "attribute": "getting near to the office",
                    "change": "more likely"
                },
                {
                    "type": "event",
                    "event": "The employee is more likely to run across his colleague.",
                    "change": "more likely"
                }
            ],
            [
                {
                    "type": "step",
                    "step": "Sit down at office desk."
                },
                {
                    "type": "entity",
                    "entity": "the employee",
                    "attribute": "getting near to the office",
                    "change": "more likely"
                },
                {
                    "type": "event",
                    "event": "The employee is more likely to run across his colleague.",
                    "change": "more likely"
                },
                {
                    "type": "predicted_event",
                    "event": "The car can be locked from outside now.",
                    "change": "more likely"
                }
            ]
        ]
    },
    "168": {
        "goal": "Paint a house",
        "annotator": "Jihong Liang",
        "steps": [
            [
                {
                    "type": "step",
                    "step": "Start."
                }
            ],
            [
                {
                    "type": "step",
                    "step": "Buy paint."
                }
            ],
            [
                {
                    "type": "step",
                    "step": "Buy roller."
                }
            ],
            [
                {
                    "type": "step",
                    "step": "Apply primer."
                },
                {
                    "type": "entity",
                    "entity": "the walls",
                    "attribute": "dry",
                    "change": "less likely"
                },
                {
                    "type": "event",
                    "event": "I touch the wall without staining my hand.",
                    "change": "less likely"
                }
            ],
            [
                {
                    "type": "step",
                    "step": "Apply first layer of paint."
                },
                {
                    "type": "entity",
                    "entity": "the walls",
                    "attribute": "dry",
                    "change": "less likely"
                },
                {
                    "type": "event",
                    "event": "I touch the wall without staining my hand.",
                    "change": "less likely"
                },
                {
                    "type": "predicted_event",
                    "event": "I touch the wall without staining my hand.",
                    "change": "more likely"
                }
            ],
            [
                {
                    "type": "step",
                    "step": "Apply second layer of paint."
                },
                {
                    "type": "entity",
                    "entity": "the walls",
                    "attribute": "dry",
                    "change": "less likely"
                },
                {
                    "type": "event",
                    "event": "I touch the wall without staining my hand.",
                    "change": "less likely"
                }
            ],
            [
                {
                    "type": "step",
                    "step": "Open the windows for air."
                }
            ],
            [
                {
                    "type": "step",
                    "step": "Wait for 3 hours to paint to dry."
                },
                {
                    "type": "entity",
                    "entity": "the walls",
                    "attribute": "dry",
                    "change": "less likely"
                },
                {
                    "type": "event",
                    "event": "I touch the wall without staining my hand.",
                    "change": "more likely"
                }
            ],
            [
                {
                    "type": "step",
                    "step": "Pack up tools and paint in storage."
                }
            ]
        ]
    },
    "169": {
        "goal": "Make strawberry jam",
        "annotator": "Jihong Liang",
        "steps": [
            [
                {
                    "type": "step",
                    "step": "Start."
                }
            ],
            [
                {
                    "type": "step",
                    "step": "Buy strawberries."
                }
            ],
            [
                {
                    "type": "step",
                    "step": "Wash strawberries."
                }
            ],
            [
                {
                    "type": "step",
                    "step": "Cut strawberries to small pieces."
                }
            ],
            [
                {
                    "type": "step",
                    "step": "Add sugar to release the water in the strawberries."
                },
                {
                    "type": "predicted_event",
                    "event": "The strawberries have turned into jam.",
                    "change": "more likely"
                }
            ],
            [
                {
                    "type": "step",
                    "step": "Heat up the pot."
                }
            ],
            [
                {
                    "type": "step",
                    "step": "Pour strawberries into the pot."
                }
            ],
            [
                {
                    "type": "step",
                    "step": "Stir the mixture constantly."
                }
            ],
            [
                {
                    "type": "step",
                    "step": "When mixture turns thick, remove from heat."
                },
                {
                    "type": "entity",
                    "entity": "strawberry mixture",
                    "attribute": "liquified",
                    "change": "more likely"
                },
                {
                    "type": "event",
                    "event": "The strawberries have turned into jam.",
                    "change": "more likely"
                }
            ],
            [
                {
                    "type": "step",
                    "step": "Pour jam into jars."
                }
            ]
        ]
    },
    "170": {
        "goal": "Make ramen",
        "annotator": "Jihong Liang",
        "steps": [
            [
                {
                    "type": "step",
                    "step": "Start."
                }
            ],
            [
                {
                    "type": "step",
                    "step": "Put water in pot."
                }
            ],
            [
                {
                    "type": "step",
                    "step": "Boil the water."
                },
                {
                    "type": "entity",
                    "entity": "the pot",
                    "attribute": "hot",
                    "change": "more likely"
                },
                {
                    "type": "event",
                    "event": "I can touch the pot with bare hands",
                    "change": "less likely"
                }
            ],
            [
                {
                    "type": "step",
                    "step": "Wash vegetables."
                }
            ],
            [
                {
                    "type": "step",
                    "step": "Put noodles in pot."
                }
            ],
            [
                {
                    "type": "step",
                    "step": "Put vegetables in pot."
                }
            ],
            [
                {
                    "type": "step",
                    "step": "Add seasoning."
                }
            ],
            [
                {
                    "type": "step",
                    "step": "Stir occasionally."
                },
                {
                    "type": "predicted_event",
                    "event": "I can safely eat the noodles.",
                    "change": "more likely"
                }
            ],
            [
                {
                    "type": "step",
                    "step": "Wait for noodles to become soft."
                },
                {
                    "type": "entity",
                    "entity": "the noodles",
                    "attribute": "cooked",
                    "change": "more likely"
                },
                {
                    "type": "event",
                    "event": "I can safely eat the noodles.",
                    "change": "more likely"
                }
            ],
            [
                {
                    "type": "step",
                    "step": "turn off heat."
                }
            ],
            [
                {
                    "type": "step",
                    "step": "Server in bowls."
                }
            ]
        ]
    },
    "171": {
        "goal": "Assemble a dining table",
        "annotator": "Jihong Liang",
        "steps": [
            [
                {
                    "type": "step",
                    "step": "Start."
                }
            ],
            [
                {
                    "type": "step",
                    "step": "Take all materials out of the box."
                },
                {
                    "type": "predicted_event",
                    "event": "The table can be put in up-right position.",
                    "change": "more likely"
                }
            ],
            [
                {
                    "type": "step",
                    "step": "Retrieve all the necessary tools."
                }
            ],
            [
                {
                    "type": "step",
                    "step": "Put together the counter top."
                }
            ],
            [
                {
                    "type": "step",
                    "step": "Screw on the legs."
                },
                {
                    "type": "entity",
                    "entity": "dining table",
                    "attribute": "assembled",
                    "change": "more likely"
                },
                {
                    "type": "event",
                    "event": "The table can be put in up-right position.",
                    "change": "more likely"
                }
            ],
            [
                {
                    "type": "step",
                    "step": "Flip the dining table over."
                }
            ],
            [
                {
                    "type": "step",
                    "step": "Wipe clean for use."
                }
            ]
        ]
    },
    "172": {
        "goal": "Bake banana bread",
        "annotator": "Jihong Liang",
        "steps": [
            [
                {
                    "type": "step",
                    "step": "Start."
                }
            ],
            [
                {
                    "type": "step",
                    "step": "Turn on the oven for preheating."
                },
                {
                    "type": "entity",
                    "entity": "the oven",
                    "attribute": "hot",
                    "change": "more likely"
                },
                {
                    "type": "event",
                    "event": "I can cook food with the oven.",
                    "change": "more likely"
                }
            ],
            [
                {
                    "type": "step",
                    "step": "Pour flour into bowl."
                }
            ],
            [
                {
                    "type": "step",
                    "step": "Stir eggs."
                }
            ],
            [
                {
                    "type": "step",
                    "step": "Pour eggs into bowl."
                },
                {
                    "type": "predicted_event",
                    "event": "I can cook food with the oven.",
                    "change": "more likely"
                }
            ],
            [
                {
                    "type": "step",
                    "step": "Mash bananas."
                }
            ],
            [
                {
                    "type": "step",
                    "step": "Add bananas into bowl."
                }
            ],
            [
                {
                    "type": "step",
                    "step": "Add a pinch of salt."
                },
                {
                    "type": "predicted_event",
                    "event": "I can eat the banana bread without getting sick.",
                    "change": "more likely"
                }
            ],
            [
                {
                    "type": "step",
                    "step": "Mix the mixture in the bowl well."
                }
            ],
            [
                {
                    "type": "step",
                    "step": "Pour into baking pan."
                }
            ],
            [
                {
                    "type": "step",
                    "step": "Put into oven."
                },
                {
                    "type": "entity",
                    "entity": "oven",
                    "attribute": "hot",
                    "change": "more likely"
                },
                {
                    "type": "event",
                    "event": "I can cook food with the oven.",
                    "change": "more likely"
                }
            ],
            [
                {
                    "type": "step",
                    "step": "Take out after 20 minutes."
                },
                {
                    "type": "entity",
                    "entity": "the baking mixture",
                    "attribute": "still in liquid form",
                    "change": "less likely"
                },
                {
                    "type": "event",
                    "event": "I can eat the banana bread without getting sick.",
                    "change": "more likely"
                }
            ],
            [
                {
                    "type": "step",
                    "step": "Turn off the oven."
                },
                {
                    "type": "entity",
                    "entity": "oven",
                    "attribute": "hot",
                    "change": "less likely"
                },
                {
                    "type": "event",
                    "event": "I can cook food with the oven.",
                    "change": "less likely"
                }
            ],
            [
                {
                    "type": "step",
                    "step": "Serve."
                }
            ]
        ]
    },
    "173": {
        "goal": "Wash dishes",
        "annotator": "Jihong Liang",
        "steps": [
            [
                {
                    "type": "step",
                    "step": "Start."
                }
            ],
            [
                {
                    "type": "step",
                    "step": "Clear dishes of large food particles."
                },
                {
                    "type": "entity",
                    "entity": "dishes",
                    "attribute": "contain large food particles",
                    "change": "less likely"
                },
                {
                    "type": "event",
                    "event": "I can put the dishes into the dish washer.",
                    "change": "more likely"
                },
                {
                    "type": "predicted_event",
                    "event": "I can put the dishes into the dish washer.",
                    "change": "more likely"
                }
            ],
            [
                {
                    "type": "step",
                    "step": "Rinse the dirty dishes."
                },
                {
                    "type": "predicted_event",
                    "event": "I can open the door of the dish washer.",
                    "change": "less likely"
                }
            ],
            [
                {
                    "type": "step",
                    "step": "Load dishes into the dishwasher."
                }
            ],
            [
                {
                    "type": "step",
                    "step": "Put in dishwasher detergent."
                },
                {
                    "type": "predicted_event",
                    "event": "I can put the dishes into the dish washer.",
                    "change": "less likely"
                },
                {
                    "type": "predicted_event",
                    "event": "I can open the door of the dish washer.",
                    "change": "more likely"
                }
            ],
            [
                {
                    "type": "step",
                    "step": "Turn on dishwasher."
                },
                {
                    "type": "entity",
                    "entity": "the dishwasher",
                    "attribute": "operating",
                    "change": "more likely"
                },
                {
                    "type": "event",
                    "event": "I can open the door of the dish washer.",
                    "change": "less likely"
                }
            ],
            [
                {
                    "type": "step",
                    "step": "Let the dishwasher run its cycle."
                }
            ],
            [
                {
                    "type": "step",
                    "step": "Unload the dishes."
                },
                {
                    "type": "entity",
                    "entity": "the dishwasher",
                    "attribute": "operating",
                    "change": "less likely"
                },
                {
                    "type": "event",
                    "event": "I can open the door of the dish washer.",
                    "change": "more likely"
                }
            ]
        ]
    },
    "174": {
        "goal": "Run a marathon",
        "annotator": "Jihong Liang",
        "steps": [
            [
                {
                    "type": "step",
                    "step": "Start."
                }
            ],
            [
                {
                    "type": "step",
                    "step": "Put on athletic wear."
                },
                {
                    "type": "predicted_event",
                    "event": "the runner feels thirsty.",
                    "change": "less likely"
                }
            ],
            [
                {
                    "type": "step",
                    "step": "Hydrate with water."
                },
                {
                    "type": "entity",
                    "entity": "runner",
                    "attribute": "hydrated",
                    "change": "more likely"
                },
                {
                    "type": "event",
                    "event": "the runner feels thirsty.",
                    "change": "less likely"
                },
                {
                    "type": "predicted_event",
                    "event": "the runner feels thirsty.",
                    "change": "more likely"
                }
            ],
            [
                {
                    "type": "step",
                    "step": "Do warm up exercises."
                }
            ],
            [
                {
                    "type": "step",
                    "step": "Get to the starting line."
                }
            ],
            [
                {
                    "type": "step",
                    "step": "Start running."
                },
                {
                    "type": "entity",
                    "entity": "runner",
                    "attribute": "hydrated",
                    "change": "less likely"
                },
                {
                    "type": "event",
                    "event": "the runner feels thirsty.",
                    "change": "more likely"
                }
            ],
            [
                {
                    "type": "step",
                    "step": "Run for 42.195km."
                },
                {
                    "type": "entity",
                    "entity": "runner",
                    "attribute": "hydrated",
                    "change": "less likely"
                },
                {
                    "type": "event",
                    "event": "the runner feels thirsty.",
                    "change": "more likely"
                }
            ],
            [
                {
                    "type": "step",
                    "step": "Celebrate this milestone."
                }
            ]
        ]
    },
    "175": {
        "goal": "Plant a vegetable garden",
        "annotator": "Jihong Liang",
        "steps": [
            [
                {
                    "type": "step",
                    "step": "Start."
                }
            ],
            [
                {
                    "type": "step",
                    "step": "Buy seeds"
                },
                {
                    "type": "entity",
                    "entity": "the seeds",
                    "attribute": "in the soil",
                    "change": "less likely"
                },
                {
                    "type": "event",
                    "event": "the seed is absorbing nutrients from the soil.",
                    "change": "less likely"
                },
                {
                    "type": "predicted_event",
                    "event": "The soil is wet.",
                    "change": "more likely"
                }
            ],
            [
                {
                    "type": "step",
                    "step": "Plow a piece of land for the garden."
                },
                {
                    "type": "predicted_event",
                    "event": "the seed is absorbing nutrients from the soil.",
                    "change": "more likely"
                }
            ],
            [
                {
                    "type": "step",
                    "step": "Dig holes."
                }
            ],
            [
                {
                    "type": "step",
                    "step": "Plant the seeds."
                },
                {
                    "type": "entity",
                    "entity": "the seeds",
                    "attribute": "in the soil",
                    "change": "more likely"
                },
                {
                    "type": "event",
                    "event": "the seed is absorbing nutrients from the soil.",
                    "change": "more likely"
                },
                {
                    "type": "predicted_event",
                    "event": "The soil is wet.",
                    "change": "more likely"
                }
            ],
            [
                {
                    "type": "step",
                    "step": "Water the soil."
                },
                {
                    "type": "entity",
                    "entity": "the soil",
                    "attribute": "watered",
                    "change": "more likely"
                },
                {
                    "type": "event",
                    "event": "The soil is wet.",
                    "change": "more likely"
                },
                {
                    "type": "predicted_event",
                    "event": "the seed is absorbing nutrients from the soil.",
                    "change": "more likely"
                }
            ],
            [
                {
                    "type": "step",
                    "step": "Fertilize the soil."
                },
                {
                    "type": "entity",
                    "entity": "soild",
                    "attribute": "fertilized",
                    "change": "more likely"
                },
                {
                    "type": "event",
                    "event": "the seed is absorbing nutrients from the soil.",
                    "change": "more likely"
                }
            ]
        ]
    },
    "177": {
        "goal": "Preparing a mango for eating",
        "annotator": "william whitehead",
        "steps": [
            [
                {
                    "step": "Start"
                }
            ],
            [
                {
                    "type": "step",
                    "step": "Wash hands with warm soapy water; dry."
                }
            ],
            [
                {
                    "type": "step",
                    "step": "Get out a cutting board, vegetable peeler, and knife"
                }
            ],
            [
                {
                    "type": "step",
                    "step": "Wash mango with soap and water"
                }
            ],
            [
                {
                    "type": "step",
                    "step": "Place mango on cutting board and peel skin off of mango"
                },
                {
                    "type": "entity",
                    "entity": "cutting board",
                    "attribute": "clean",
                    "change": "less likely"
                },
                {
                    "type": "event",
                    "event": "I put the cutting board back in the cabinet.",
                    "change": "less likely"
                }
            ],
            [
                {
                    "type": "step",
                    "step": "Place mango on one end and slice with knife down one side of mango, avoiding pit."
                }
            ],
            [
                {
                    "type": "step",
                    "step": "Slice mango down other side with knife, avoiding pit."
                },
                {
                    "type": "predicted_event",
                    "event": "I put the cutting board back in the cabinet.",
                    "change": "more likely"
                }
            ],
            [
                {
                    "type": "step",
                    "step": "Slice mango additionally to remove any extra flesh from pit."
                }
            ],
            [
                {
                    "type": "step",
                    "step": "Using knife, dice mango into bite-size pieces."
                }
            ],
            [
                {
                    "type": "step",
                    "step": "Place mango into serving dish"
                }
            ],
            [
                {
                    "type": "step",
                    "step": "Discard peel into trash or compost. "
                }
            ],
            [
                {
                    "type": "step",
                    "step": "Wash cutting board, peeler, and knife,"
                },
                {
                    "type": "entity",
                    "entity": "cutting board",
                    "attribute": "clean",
                    "change": "more likely"
                },
                {
                    "type": "event",
                    "event": "I put the cutting board back in the cabinet.",
                    "change": "more likely"
                }
            ]
        ]
    },
    "178": {
        "goal": "Make spaghetti",
        "annotator": "william whitehead",
        "steps": [
            [
                {
                    "step": "Start"
                }
            ],
            [
                {
                    "type": "step",
                    "step": "Fill a large pasta pot with water"
                },
                {
                    "type": "entity",
                    "entity": "water",
                    "attribute": "hot",
                    "change": "less likely"
                },
                {
                    "type": "event",
                    "event": "The water is hot enough for cooking.",
                    "change": "less likely"
                }
            ],
            [
                {
                    "type": "step",
                    "step": "Place on burner and turn burner to high"
                },
                {
                    "type": "entity",
                    "entity": "water",
                    "attribute": "hot",
                    "change": "more likely"
                },
                {
                    "type": "event",
                    "event": "The water is hot enough for cooking.",
                    "change": "more likely"
                }
            ],
            [
                {
                    "type": "step",
                    "step": "Measure out appropriate amount of dry spaghetti"
                },
                {
                    "type": "predicted_event",
                    "event": "The water is hot enough for cooking.",
                    "change": "more likely"
                }
            ],
            [
                {
                    "type": "step",
                    "step": "When water boils, add spaghetti to pasta pot"
                },
                {
                    "type": "entity",
                    "entity": "water",
                    "attribute": "hot",
                    "change": "more likely"
                },
                {
                    "type": "event",
                    "event": "The water is hot enough for cooking.",
                    "change": "more likely"
                },
                {
                    "type": "entity",
                    "entity": "the spaghetti",
                    "attribute": "cooked",
                    "change": "more likely"
                },
                {
                    "type": "event",
                    "event": "The spaghetti is soft.",
                    "change": "more likely"
                },
                {
                    "type": "predicted_event",
                    "event": "The spaghetti is soft.",
                    "change": "more likely"
                }
            ],
            [
                {
                    "type": "step",
                    "step": "Stir pasta and set timer for appropriate time"
                },
                {
                    "type": "entity",
                    "entity": "the spaghetti",
                    "attribute": "cooked",
                    "change": "more likely"
                },
                {
                    "type": "event",
                    "event": "The spaghetti is soft.",
                    "change": "more likely"
                }
            ],
            [
                {
                    "type": "step",
                    "step": "When timer is complete, drain pasta with a collander and place pasta in a large bowl"
                },
                {
                    "type": "entity",
                    "entity": "the spaghetti",
                    "attribute": "cooked",
                    "change": "more likely"
                },
                {
                    "type": "event",
                    "event": "The spaghetti is soft.",
                    "change": "more likely"
                }
            ],
            [
                {
                    "type": "step",
                    "step": "Add sauce or toppings if desired."
                }
            ]
        ]
    },
    "180": {
        "goal": "Heat up a frozen pizza",
        "annotator": "william whitehead",
        "steps": [
            [
                {
                    "step": "Start"
                }
            ],
            [
                {
                    "type": "step",
                    "step": "Preheat oven to desired temperature"
                },
                {
                    "type": "entity",
                    "entity": "the oven",
                    "attribute": "cool",
                    "change": "less likely"
                },
                {
                    "type": "predicted_event",
                    "event": "I can put the pizza onto the oven rack.",
                    "change": "more likely"
                }
            ],
            [
                {
                    "type": "step",
                    "step": "Take frozen pizza out of freezer"
                },
                {
                    "type": "predicted_event",
                    "event": "The pizza is cooked.",
                    "change": "more likely"
                }
            ],
            [
                {
                    "type": "step",
                    "step": "Unwrap overwrap and remove pizza from packaging."
                },
                {
                    "type": "entity",
                    "entity": "pizza",
                    "attribute": "in its package",
                    "change": "less likely"
                },
                {
                    "type": "event",
                    "event": "I can put the pizza onto the oven rack.",
                    "change": "more likely"
                }
            ],
            [
                {
                    "type": "step",
                    "step": "Once oven in preheated, place pizza either directly on rack or on cookie sheet and place in oven."
                },
                {
                    "type": "entity",
                    "entity": "the pizza crust",
                    "attribute": "browned",
                    "change": "more likely"
                },
                {
                    "type": "event",
                    "event": "The pizza is cooked.",
                    "change": "more likely"
                }
            ],
            [
                {
                    "type": "step",
                    "step": "Set timer for desired cook time."
                }
            ],
            [
                {
                    "type": "step",
                    "step": "Once timer is complete, use potholders to remove pizza from oven and place directly on cooling rack."
                },
                {
                    "type": "entity",
                    "entity": "the pizza crust",
                    "attribute": "browned",
                    "change": "more likely"
                },
                {
                    "type": "event",
                    "event": "The pizza is cooked.",
                    "change": "more likely"
                }
            ],
            [
                {
                    "type": "step",
                    "step": "Cool for desired time before slicing into six or eight slices, and serve."
                }
            ]
        ]
    },
    "181": {
        "goal": "Mow a lawn and bag clippings with a gas lawn mower",
        "annotator": "william whitehead",
        "steps": [
            [
                {
                    "step": "Start"
                }
            ],
            [
                {
                    "type": "step",
                    "step": "Take mower out of garage or storage shed"
                }
            ],
            [
                {
                    "type": "step",
                    "step": "Set cutting blade to desired height"
                },
                {
                    "type": "predicted_event",
                    "event": "I can let go of the mower.",
                    "change": "more likely"
                }
            ],
            [
                {
                    "type": "step",
                    "step": "Ensure tank is filled with gasoline"
                }
            ],
            [
                {
                    "type": "step",
                    "step": "Grasp the mower and pull on the ignition cord"
                },
                {
                    "type": "entity",
                    "entity": "mower",
                    "attribute": "operating",
                    "change": "more likely"
                },
                {
                    "type": "event",
                    "event": "I can let go of the mower.",
                    "change": "less likely"
                }
            ],
            [
                {
                    "type": "step",
                    "step": "Mow lawn until clipping bag is full"
                },
                {
                    "type": "predicted_event",
                    "event": "I can let go of the mower.",
                    "change": "less likely"
                }
            ],
            [
                {
                    "type": "step",
                    "step": "Disengage mower so engine shuts off"
                },
                {
                    "type": "entity",
                    "entity": "mower",
                    "attribute": "operating",
                    "change": "less likely"
                },
                {
                    "type": "event",
                    "event": "I can let go of the mower.",
                    "change": "more likely"
                }
            ],
            [
                {
                    "type": "step",
                    "step": "Dump clippings in waste bag or compost heap"
                }
            ],
            [
                {
                    "type": "step",
                    "step": "Restart engine and repeat until lawn is fully cut"
                },
                {
                    "type": "entity",
                    "entity": "mower",
                    "attribute": "operating",
                    "change": "more likely"
                },
                {
                    "type": "event",
                    "event": "I can let go of the mower.",
                    "change": "less likely"
                }
            ],
            [
                {
                    "type": "step",
                    "step": "Replace lawn mower back in garage or storage shed"
                },
                {
                    "type": "entity",
                    "entity": "mower",
                    "attribute": "operating",
                    "change": "less likely"
                },
                {
                    "type": "event",
                    "event": "I can let go of the mower.",
                    "change": "more likely"
                }
            ]
        ]
    },
    "184": {
        "goal": "String a classical guitar",
        "annotator": "william whitehead",
        "steps": [
            [
                {
                    "step": "Start"
                }
            ],
            [
                {
                    "type": "step",
                    "step": "Remove old strings from guitar"
                },
                {
                    "type": "entity",
                    "entity": "guitar",
                    "attribute": "tuned",
                    "change": "less likely"
                },
                {
                    "type": "event",
                    "event": "I can play a song in tune.",
                    "change": "less likely"
                },
                {
                    "type": "predicted_event",
                    "event": "I can play a song in tune.",
                    "change": "less likely"
                }
            ],
            [
                {
                    "type": "step",
                    "step": "For each string, thread string through the appropriate bridge pin"
                },
                {
                    "type": "predicted_event",
                    "event": "I can play a song in tune.",
                    "change": "more likely"
                }
            ],
            [
                {
                    "type": "step",
                    "step": "Turn tuning peg until string is taut"
                }
            ],
            [
                {
                    "type": "step",
                    "step": "When all strings are taut, tune guitar to desired tuning"
                },
                {
                    "type": "entity",
                    "entity": "guitar",
                    "attribute": "tuned",
                    "change": "more likely"
                },
                {
                    "type": "event",
                    "event": "I can play a song in tune.",
                    "change": "more likely"
                }
            ]
        ]
    },
    "185": {
        "goal": "Carve a Jack-o-lantern",
        "annotator": "william whitehead",
        "steps": [
            [
                {
                    "step": "Start"
                }
            ],
            [
                {
                    "type": "step",
                    "step": "Pick a pumpkin"
                },
                {
                    "type": "predicted_event",
                    "event": "I can see a pumpkin face.",
                    "change": "more likely"
                }
            ],
            [
                {
                    "type": "step",
                    "step": "In pen or marker, sketch a spooky face on the outside of the pumpkin"
                }
            ],
            [
                {
                    "type": "step",
                    "step": "Find a large knife"
                }
            ],
            [
                {
                    "type": "step",
                    "step": "Carve the crown of the pumpkin to remove the top part and stem; set aside"
                },
                {
                    "type": "entity",
                    "entity": "the pumpkin",
                    "attribute": "carved",
                    "change": "more likely"
                },
                {
                    "type": "event",
                    "event": "I can see a pumpkin face.",
                    "change": "more likely"
                },
                {
                    "type": "predicted_event",
                    "event": "The face of the jack-o-latern is visible in the dark.",
                    "change": "more likely"
                }
            ],
            [
                {
                    "type": "step",
                    "step": "Remove the seeds and \"guts\" of the pumpkin with a large spoon"
                }
            ],
            [
                {
                    "type": "step",
                    "step": "Carve the face of the pumpkin cutting out the areas traced in pen or marker"
                },
                {
                    "type": "entity",
                    "entity": "the pumpkin",
                    "attribute": "carved",
                    "change": "more likely"
                },
                {
                    "type": "event",
                    "event": "I can see a pumpkin face.",
                    "change": "more likely"
                }
            ],
            [
                {
                    "type": "step",
                    "step": "Place a small tea light in the pumpkin"
                },
                {
                    "type": "entity",
                    "entity": "the pumpkin",
                    "attribute": "illuminated",
                    "change": "more likely"
                },
                {
                    "type": "event",
                    "event": "The face of the jack-o-latern is visible in the dark.",
                    "change": "more likely"
                }
            ],
            [
                {
                    "type": "step",
                    "step": "Replace the crown of the pumpkin"
                }
            ]
        ]
    },
    "186": {
        "goal": "Build a Campfire",
        "annotator": "Jiatai Sun",
        "steps": [
            [
                {
                    "type": "step",
                    "step": "Start."
                }
            ],
            [
                {
                    "type": "step",
                    "step": "Collect your tinder."
                }
            ],
            [
                {
                    "type": "step",
                    "step": "Gather kindling and firewood."
                },
                {
                    "type": "entity",
                    "entity": "firewood",
                    "attribute": "arranged",
                    "change": "more likely"
                },
                {
                    "type": "event",
                    "event": "Campfire is build to be ignited.",
                    "change": "more likely"
                },
                {
                    "type": "predicted_event",
                    "event": "Campfire is build to be ignited.",
                    "change": "more likely"
                }
            ],
            [
                {
                    "type": "step",
                    "step": "Arrange the kindling and firewood."
                },
                {
                    "type": "entity",
                    "entity": "firewood",
                    "attribute": "arranged",
                    "change": "more likely"
                },
                {
                    "type": "event",
                    "event": "Campfire is build to be ignited.",
                    "change": "more likely"
                },
                {
                    "type": "predicted_event",
                    "event": "Temperature raises.",
                    "change": "more likely"
                }
            ],
            [
                {
                    "type": "step",
                    "step": "Light the fire."
                },
                {
                    "type": "entity",
                    "entity": "the campfire",
                    "attribute": "up",
                    "change": "more likely"
                },
                {
                    "type": "event",
                    "event": "Temperature raises.",
                    "change": "more likely"
                }
            ],
            [
                {
                    "type": "step",
                    "step": "Put out your fire."
                },
                {
                    "type": "entity",
                    "entity": "the campfire",
                    "attribute": "up",
                    "change": "less likely"
                },
                {
                    "type": "event",
                    "event": "Temperature raises.",
                    "change": "less likely"
                }
            ],
            [
                {
                    "type": "step",
                    "step": "Cleanup all traces of your fire."
                }
            ]
        ]
    },
    "188": {
        "goal": "Fill Gas In Canada",
        "annotator": "Jiatai Sun",
        "steps": [
            [
                {
                    "type": "step",
                    "step": "Start."
                }
            ],
            [
                {
                    "type": "step",
                    "step": "Park next to a pump and turn off your vehicle's engine"
                },
                {
                    "type": "entity",
                    "entity": "car",
                    "attribute": "next to gas pump",
                    "change": "more likely"
                },
                {
                    "type": "event",
                    "event": "I can use my phone.",
                    "change": "less likely"
                },
                {
                    "type": "predicted_event",
                    "event": "I can drive away my car.",
                    "change": "less likely"
                }
            ],
            [
                {
                    "type": "step",
                    "step": "Leave your phone in your vehicle and avoid smoking"
                }
            ],
            [
                {
                    "type": "step",
                    "step": "Insert your credit or debit card if you want to pay at the pump"
                },
                {
                    "type": "predicted_event",
                    "event": "I can use my phone.",
                    "change": "less likely"
                }
            ],
            [
                {
                    "type": "step",
                    "step": "Prepay or pay with cash by paying inside the gas station."
                }
            ],
            [
                {
                    "type": "step",
                    "step": "Open up your vehicle's gas cap"
                },
                {
                    "type": "entity",
                    "entity": "gas cap",
                    "attribute": "opened",
                    "change": "more likely"
                },
                {
                    "type": "event",
                    "event": "I can drive away my car.",
                    "change": "less likely"
                }
            ],
            [
                {
                    "type": "step",
                    "step": "Pick up the nozzle and select your fuel grade"
                }
            ],
            [
                {
                    "type": "step",
                    "step": "Stand by the pump while you refuel"
                }
            ],
            [
                {
                    "type": "step",
                    "step": "Replace the nozzle and close your gas cap when you are finished"
                },
                {
                    "type": "entity",
                    "entity": "gas cap",
                    "attribute": "opened",
                    "change": "less likely"
                },
                {
                    "type": "event",
                    "event": "I can drive away my car.",
                    "change": "more likely"
                },
                {
                    "type": "predicted_event",
                    "event": "I can drive away my car.",
                    "change": "more likely"
                }
            ]
        ]
    },
    "189": {
        "goal": "Open a beer bottle with a key",
        "annotator": "Jiatai Sun",
        "steps": [
            [
                {
                    "type": "step",
                    "step": "Start."
                }
            ],
            [
                {
                    "type": "step",
                    "step": "Look for any bent ridges"
                }
            ],
            [
                {
                    "type": "step",
                    "step": "Slide the tip of the key under a ridge"
                },
                {
                    "type": "predicted_event",
                    "event": "I can pour the beer out.",
                    "change": "more likely"
                }
            ],
            [
                {
                    "type": "step",
                    "step": "Twist the key until the ridge bends upwards"
                },
                {
                    "type": "entity",
                    "entity": "cap",
                    "attribute": "attached to the bottle.",
                    "change": "less likely"
                },
                {
                    "type": "event",
                    "event": "I can pour the beer out.",
                    "change": "more likely"
                }
            ],
            [
                {
                    "type": "step",
                    "step": "Repeat until at least 4 ridges in a row are up"
                },
                {
                    "type": "entity",
                    "entity": "cap",
                    "attribute": "attached to the bottle.",
                    "change": "less likely"
                },
                {
                    "type": "event",
                    "event": "I can pour the beer out.",
                    "change": "more likely"
                }
            ],
            [
                {
                    "type": "step",
                    "step": "Grasp the bottle firmly in your hand"
                }
            ],
            [
                {
                    "type": "step",
                    "step": "Press the key upwards until the cap pops off"
                },
                {
                    "type": "entity",
                    "entity": "cap",
                    "attribute": "attached to the bottle.",
                    "change": "less likely"
                },
                {
                    "type": "event",
                    "event": "I can pour the beer out.",
                    "change": "more likely"
                }
            ]
        ]
    },
    "190": {
        "goal": "Enabling and Using Push-to-Talk",
        "annotator": "Jiatai Sun",
        "steps": [
            [
                {
                    "type": "step",
                    "step": "Start."
                }
            ],
            [
                {
                    "type": "step",
                    "step": "Open Zoom on your PC or Mac"
                }
            ],
            [
                {
                    "type": "step",
                    "step": "Click the gear icon"
                }
            ],
            [
                {
                    "type": "step",
                    "step": "Click Audio in the menu"
                },
                {
                    "type": "predicted_event",
                    "event": "People can hear me when I hold SPACE key.",
                    "change": "more likely"
                }
            ],
            [
                {
                    "type": "step",
                    "step": "Check the box next to \"Press and hold SPACE key to temporarily unmute yourself\""
                },
                {
                    "type": "entity",
                    "entity": "push-to-talk",
                    "attribute": "enabled",
                    "change": "more likely"
                },
                {
                    "type": "event",
                    "event": "People can hear me when I hold SPACE key.",
                    "change": "more likely"
                }
            ]
        ]
    },
    "194": {
        "goal": "Defrost Ground Pork using Cold water",
        "annotator": "Jiatai Sun",
        "steps": [
            [
                {
                    "type": "step",
                    "step": "Start."
                }
            ],
            [
                {
                    "type": "step",
                    "step": "Plan on 60 minutes per 1 pound (450?g) of ground pork for thawing"
                },
                {
                    "type": "predicted_event",
                    "event": "The pork is getting softer.",
                    "change": "more likely"
                }
            ],
            [
                {
                    "type": "step",
                    "step": "Secure the ground pork inside a plastic bag."
                },
                {
                    "type": "predicted_event",
                    "event": "The pork is getting softer.",
                    "change": "more likely"
                }
            ],
            [
                {
                    "type": "step",
                    "step": "Submerge the pork in cold tap water"
                },
                {
                    "type": "entity",
                    "entity": "pork",
                    "attribute": "temperature raising",
                    "change": "more likely"
                },
                {
                    "type": "event",
                    "event": "The pork is getting softer.",
                    "change": "more likely"
                }
            ],
            [
                {
                    "type": "step",
                    "step": "Change the water every 30 minutes"
                },
                {
                    "type": "entity",
                    "entity": "pork",
                    "attribute": "temperature raising",
                    "change": "more likely"
                },
                {
                    "type": "event",
                    "event": "The pork is getting softer.",
                    "change": "more likely"
                }
            ],
            [
                {
                    "type": "step",
                    "step": "Check to see if the pork is thawed after an hour."
                },
                {
                    "type": "entity",
                    "entity": "pork",
                    "attribute": "temperature raising",
                    "change": "more likely"
                },
                {
                    "type": "event",
                    "event": "The pork is getting softer.",
                    "change": "more likely"
                }
            ],
            [
                {
                    "type": "step",
                    "step": "Use the ground pork immediately"
                }
            ]
        ]
    },
    "195": {
        "goal": "Defrost Ground Beef Using a Microwave",
        "annotator": "Jiatai Sun",
        "steps": [
            [
                {
                    "type": "step",
                    "step": "Start."
                }
            ],
            [
                {
                    "type": "step",
                    "step": "Take the beef out of its packaging"
                }
            ],
            [
                {
                    "type": "step",
                    "step": "Place the beef in a microwave-safe glass dish"
                }
            ],
            [
                {
                    "type": "step",
                    "step": "Microwave the beef at 50 percent power"
                },
                {
                    "type": "entity",
                    "entity": "the ground beef",
                    "attribute": "defrosted",
                    "change": "more likely"
                },
                {
                    "type": "event",
                    "event": "We start cooking using the ground beef.",
                    "change": "more likely"
                },
                {
                    "type": "predicted_event",
                    "event": "We start cooking using the ground beef.",
                    "change": "more likely"
                }
            ],
            [
                {
                    "type": "step",
                    "step": "Determine whether or not the beef has defrosted enough by pressing on it"
                },
                {
                    "type": "entity",
                    "entity": "the ground beef",
                    "attribute": "defrosted",
                    "change": "more likely"
                },
                {
                    "type": "event",
                    "event": "We start cooking using the ground beef.",
                    "change": "more likely"
                }
            ],
            [
                {
                    "type": "step",
                    "step": "Use your ground beef immediately"
                }
            ]
        ]
    },
    "197": {
        "goal": "Change broken light bulb in bedroom",
        "annotator": "hans dejong",
        "steps": [
            [
                {
                    "type": "step",
                    "step": "Start."
                }
            ],
            [
                {
                    "type": "step",
                    "step": "Make sure the power is turned off."
                },
                {
                    "type": "entity",
                    "entity": "bulb",
                    "attribute": "functional",
                    "change": "less likely"
                },
                {
                    "type": "event",
                    "event": "illuminate the room at night.",
                    "change": "less likely"
                },
                {
                    "type": "predicted_event",
                    "event": "illuminate the room at night.",
                    "change": "less likely"
                }
            ],
            [
                {
                    "type": "step",
                    "step": "Let the bulb cool off if necessary."
                },
                {
                    "type": "predicted_event",
                    "event": "illuminate the room at night.",
                    "change": "less likely"
                }
            ],
            [
                {
                    "type": "step",
                    "step": "Get a sturdy stepladder."
                },
                {
                    "type": "predicted_event",
                    "event": "illuminate the room at night.",
                    "change": "more likely"
                }
            ],
            [
                {
                    "type": "step",
                    "step": "Using stepladder, unscrew light bulb."
                },
                {
                    "type": "predicted_event",
                    "event": "illuminate the room at night.",
                    "change": "more likely"
                }
            ],
            [
                {
                    "type": "step",
                    "step": "Put a new bulb in the socket. "
                },
                {
                    "type": "entity",
                    "entity": "bulb",
                    "attribute": "functional",
                    "change": "more likely"
                },
                {
                    "type": "event",
                    "event": "illuminate the room at night.",
                    "change": "more likely"
                }
            ]
        ]
    },
    "199": {
        "goal": "Free dive",
        "annotator": "hans dejong",
        "steps": [
            [
                {
                    "type": "step",
                    "step": "Start."
                }
            ],
            [
                {
                    "type": "step",
                    "step": "Anchor the boat."
                }
            ],
            [
                {
                    "type": "step",
                    "step": "Throw an additional rope in water."
                }
            ],
            [
                {
                    "type": "step",
                    "step": "Monitor the water for sharks."
                }
            ],
            [
                {
                    "type": "step",
                    "step": "Descent slowly."
                },
                {
                    "type": "entity",
                    "entity": "diver",
                    "attribute": "surrounded by air",
                    "change": "less likely"
                },
                {
                    "type": "event",
                    "event": "The diver can breath with his nose.",
                    "change": "less likely"
                },
                {
                    "type": "predicted_event",
                    "event": "The diver can breath with his nose.",
                    "change": "more likely"
                }
            ],
            [
                {
                    "type": "step",
                    "step": "Equalize your ears."
                }
            ],
            [
                {
                    "type": "step",
                    "step": "Ascent."
                },
                {
                    "type": "entity",
                    "entity": "diver",
                    "attribute": "surrounded by air",
                    "change": "more likely"
                },
                {
                    "type": "event",
                    "event": "The diver can breath with his nose.",
                    "change": "more likely"
                }
            ],
            [
                {
                    "type": "step",
                    "step": "Get into the boat. "
                }
            ]
        ]
    },
    "201": {
        "goal": "Cook rice",
        "annotator": "hans dejong",
        "steps": [
            [
                {
                    "type": "step",
                    "step": "Start."
                }
            ],
            [
                {
                    "type": "step",
                    "step": "Soak and rinse the rice."
                }
            ],
            [
                {
                    "type": "step",
                    "step": "Boil the water."
                }
            ],
            [
                {
                    "type": "step",
                    "step": "Simmer the rice with salt and oil."
                },
                {
                    "type": "entity",
                    "entity": "the rice",
                    "attribute": "soft",
                    "change": "more likely"
                },
                {
                    "type": "event",
                    "event": "The rice is edible.",
                    "change": "more likely"
                }
            ],
            [
                {
                    "type": "step",
                    "step": "Let the rice rest when done."
                },
                {
                    "type": "entity",
                    "entity": "the rice",
                    "attribute": "soft",
                    "change": "more likely"
                },
                {
                    "type": "event",
                    "event": "The rice is edible.",
                    "change": "more likely"
                }
            ],
            [
                {
                    "type": "step",
                    "step": "Eat the rice. "
                }
            ]
        ]
    },
    "202": {
        "goal": "Park your car on a hill",
        "annotator": "hans dejong",
        "steps": [
            [
                {
                    "type": "step",
                    "step": "Start."
                }
            ],
            [
                {
                    "type": "step",
                    "step": "Look for a open spot."
                }
            ],
            [
                {
                    "type": "step",
                    "step": "Park your car parallel to the curb."
                },
                {
                    "type": "entity",
                    "entity": "the car",
                    "attribute": "stationary",
                    "change": "more likely"
                },
                {
                    "type": "event",
                    "event": "You can get out of the car.",
                    "change": "more likely"
                }
            ],
            [
                {
                    "type": "step",
                    "step": "Roll the car into the curb."
                },
                {
                    "type": "entity",
                    "entity": "the car",
                    "attribute": "stationary",
                    "change": "less likely"
                },
                {
                    "type": "event",
                    "event": "You can get out of the car.",
                    "change": "less likely"
                }
            ],
            [
                {
                    "type": "step",
                    "step": "Engage the handbrake."
                },
                {
                    "type": "entity",
                    "entity": "the car",
                    "attribute": "stationary",
                    "change": "more likely"
                },
                {
                    "type": "event",
                    "event": "You can get out of the car.",
                    "change": "more likely"
                }
            ]
        ]
    },
    "203": {
        "goal": "Go for a run",
        "annotator": "hans dejong",
        "steps": [
            [
                {
                    "type": "step",
                    "step": "Start."
                }
            ],
            [
                {
                    "type": "step",
                    "step": "Get good comfortable gear. "
                }
            ],
            [
                {
                    "type": "step",
                    "step": "Find safe routes."
                }
            ],
            [
                {
                    "type": "step",
                    "step": "Start moving to get your body ready to run. "
                },
                {
                    "type": "predicted_event",
                    "event": "The risk of getting injured is reduced.",
                    "change": "more likely"
                }
            ],
            [
                {
                    "type": "step",
                    "step": "Stretch to warm up. "
                },
                {
                    "type": "entity",
                    "entity": "runner",
                    "attribute": "warmed up",
                    "change": "more likely"
                },
                {
                    "type": "event",
                    "event": "The risk of getting injured is reduced.",
                    "change": "less likely"
                }
            ],
            [
                {
                    "type": "step",
                    "step": "Find your pace so you feel sustainable. "
                }
            ],
            [
                {
                    "type": "step",
                    "step": "Start walking to cool off."
                }
            ],
            [
                {
                    "type": "step",
                    "step": "Take a shower."
                },
                {
                    "type": "entity",
                    "entity": "runner",
                    "attribute": "warmed up",
                    "change": "less likely"
                },
                {
                    "type": "event",
                    "event": "The risk of getting injured is reduced.",
                    "change": "more likely"
                }
            ]
        ]
    },
    "204": {
        "goal": "Wash dishes",
        "annotator": "hans dejong",
        "steps": [
            [
                {
                    "type": "step",
                    "step": "Start."
                }
            ],
            [
                {
                    "type": "step",
                    "step": "Scrape off any remaining food waste."
                },
                {
                    "type": "predicted_event",
                    "event": "wash my hands in the sink filled with warm water.",
                    "change": "more likely"
                },
                {
                    "type": "predicted_event",
                    "event": "wash my hands in the sink filled with cold water.",
                    "change": "less likely"
                }
            ],
            [
                {
                    "type": "step",
                    "step": "Put on rubber gloves."
                },
                {
                    "type": "entity",
                    "entity": "hands",
                    "attribute": "covered by gloves",
                    "change": "more likely"
                },
                {
                    "type": "event",
                    "event": "touch dirty dishes and keep hands clean",
                    "change": "more likely"
                },
                {
                    "type": "predicted_event",
                    "event": "touch dirty dishes and keep hands clean",
                    "change": "more likely"
                }
            ],
            [
                {
                    "type": "step",
                    "step": "Plug the sink."
                }
            ],
            [
                {
                    "type": "step",
                    "step": "Add in soap."
                }
            ],
            [
                {
                    "type": "step",
                    "step": "Add warm water to sink. "
                },
                {
                    "type": "predicted_event",
                    "event": "touch dirty dishes and keep hands clean",
                    "change": "less likely"
                }
            ],
            [
                {
                    "type": "step",
                    "step": "Add cold water to another sink."
                }
            ],
            [
                {
                    "type": "step",
                    "step": "Soak the dish into the soapy water."
                },
                {
                    "type": "entity",
                    "entity": "warm water",
                    "attribute": "clean",
                    "change": "less likely"
                },
                {
                    "type": "event",
                    "event": "wash my hands in the sink filled with warm water.",
                    "change": "less likely"
                },
                {
                    "type": "predicted_event",
                    "event": "wash my hands in the sink filled with warm water.",
                    "change": "less likely"
                },
                {
                    "type": "predicted_event",
                    "event": "wash my hands in the sink filled with cold water.",
                    "change": "more likely"
                }
            ],
            [
                {
                    "type": "step",
                    "step": "Scrub the dish."
                }
            ],
            [
                {
                    "type": "step",
                    "step": "Rinse the dish in the cold water."
                },
                {
                    "type": "entity",
                    "entity": "cold water",
                    "attribute": "clean",
                    "change": "less likely"
                },
                {
                    "type": "event",
                    "event": "wash my hands in the sink filled with cold water.",
                    "change": "less likely"
                }
            ],
            [
                {
                    "type": "step",
                    "step": "Dry the dish."
                }
            ]
        ]
    },
    "205": {
        "goal": "Take a shower",
        "annotator": "hans dejong",
        "steps": [
            [
                {
                    "type": "step",
                    "step": "Start."
                }
            ],
            [
                {
                    "type": "step",
                    "step": "Get ready to shower."
                },
                {
                    "type": "predicted_event",
                    "event": "I can stop shower.",
                    "change": "less likely"
                }
            ],
            [
                {
                    "type": "step",
                    "step": "Check the water temperature."
                }
            ],
            [
                {
                    "type": "step",
                    "step": "Carefully enter the shower."
                },
                {
                    "type": "entity",
                    "entity": "feet",
                    "attribute": "wet",
                    "change": "more likely"
                },
                {
                    "type": "event",
                    "event": "You slip easily.",
                    "change": "more likely"
                },
                {
                    "type": "predicted_event",
                    "event": "You slip easily.",
                    "change": "more likely"
                }
            ],
            [
                {
                    "type": "step",
                    "step": "Lather shampoo into your hair."
                },
                {
                    "type": "entity",
                    "entity": "hair",
                    "attribute": "covered with shampoo",
                    "change": "more likely"
                },
                {
                    "type": "event",
                    "event": "I can stop shower.",
                    "change": "less likely"
                }
            ],
            [
                {
                    "type": "step",
                    "step": "Rinse your hair."
                },
                {
                    "type": "entity",
                    "entity": "hair",
                    "attribute": "covered with shampoo",
                    "change": "less likely"
                },
                {
                    "type": "event",
                    "event": "I can stop shower.",
                    "change": "more likely"
                }
            ],
            [
                {
                    "type": "step",
                    "step": "Lather soap on your body."
                },
                {
                    "type": "entity",
                    "entity": "body",
                    "attribute": "covered with shampoo",
                    "change": "more likely"
                },
                {
                    "type": "event",
                    "event": "I can stop shower.",
                    "change": "less likely"
                },
                {
                    "type": "predicted_event",
                    "event": "I can stop shower.",
                    "change": "more likely"
                }
            ],
            [
                {
                    "type": "step",
                    "step": "Rinse your body."
                },
                {
                    "type": "entity",
                    "entity": "body",
                    "attribute": "covered with shampoo",
                    "change": "less likely"
                },
                {
                    "type": "event",
                    "event": "I can stop shower.",
                    "change": "more likely"
                },
                {
                    "type": "predicted_event",
                    "event": "You slip easily.",
                    "change": "less likely"
                }
            ],
            [
                {
                    "type": "step",
                    "step": "Turn off the water."
                }
            ],
            [
                {
                    "type": "step",
                    "step": "Dry your body with a towel."
                },
                {
                    "type": "entity",
                    "entity": "feet",
                    "attribute": "wet",
                    "change": "less likely"
                },
                {
                    "type": "event",
                    "event": "You slip easily.",
                    "change": "less likely"
                }
            ],
            [
                {
                    "type": "step",
                    "step": "Put on your clothes. "
                }
            ]
        ]
    },
    "206": {
        "goal": "Make crispy french fries",
        "annotator": "Chenming Cao",
        "steps": [
            [
                {
                    "type": "step",
                    "step": "Start."
                }
            ],
            [
                {
                    "type": "step",
                    "step": "Peel potatoes and cut them into 1/4 inch thick sticks."
                }
            ],
            [
                {
                    "type": "step",
                    "step": "Put the fries in a bowl of cold water and refrigerate them for at least 1 hour."
                },
                {
                    "type": "entity",
                    "entity": "potatoes",
                    "attribute": "dry",
                    "change": "less likely"
                },
                {
                    "type": "event",
                    "event": "I can fry the potato without severe oil spilling.",
                    "change": "less likely"
                }
            ],
            [
                {
                    "type": "step",
                    "step": "Drain the fries and pat them dry with paper towels."
                },
                {
                    "type": "entity",
                    "entity": "potatoes",
                    "attribute": "dry",
                    "change": "more likely"
                },
                {
                    "type": "event",
                    "event": "I can fry the potato without severe oil spilling.",
                    "change": "more likely"
                }
            ],
            [
                {
                    "type": "step",
                    "step": "Pour oil into a heavy pot and heat it to 325F."
                },
                {
                    "type": "entity",
                    "entity": "oil",
                    "attribute": "hot",
                    "change": "more likely"
                },
                {
                    "type": "event",
                    "event": "The resulting fries are crispy.",
                    "change": "more likely"
                },
                {
                    "type": "predicted_event",
                    "event": "I can fry the potato without severe oil spilling.",
                    "change": "more likely"
                },
                {
                    "type": "predicted_event",
                    "event": "The resulting fries are crispy.",
                    "change": "more likely"
                }
            ],
            [
                {
                    "type": "step",
                    "step": "Lower 1/3 of the fries into the oil and fry them for 3 to 4 minutes."
                }
            ],
            [
                {
                    "type": "step",
                    "step": "Transfer the fries to paper towels and par-fry the remaining batches."
                }
            ],
            [
                {
                    "type": "step",
                    "step": "Heat the oil to 375F and fry 1 batch of par-fried french fries for 3 to 4 minutes."
                },
                {
                    "type": "entity",
                    "entity": "oil",
                    "attribute": "hot",
                    "change": "more likely"
                },
                {
                    "type": "event",
                    "event": "The resulting fries are crispy.",
                    "change": "more likely"
                }
            ],
            [
                {
                    "type": "step",
                    "step": "Fry the remaining batches of fries until they are crispy."
                }
            ]
        ]
    },
    "208": {
        "goal": "Connect dual monitors for a computer",
        "annotator": "Chenming Cao",
        "steps": [
            [
                {
                    "type": "step",
                    "step": "Start."
                }
            ],
            [
                {
                    "type": "step",
                    "step": "Purchase an HDMI adapter if needed."
                },
                {
                    "type": "predicted_event",
                    "event": "The monitors can be powered on.",
                    "change": "more likely"
                }
            ],
            [
                {
                    "type": "step",
                    "step": "Arrange your dual monitors and computer on a desk."
                }
            ],
            [
                {
                    "type": "step",
                    "step": "Connect the monitors to your computer."
                },
                {
                    "type": "predicted_event",
                    "event": "The monitor displays content.",
                    "change": "more likely"
                }
            ],
            [
                {
                    "type": "step",
                    "step": "Plug the monitors and computer tower into a power strip."
                },
                {
                    "type": "entity",
                    "entity": "monitors",
                    "attribute": "plugged in",
                    "change": "more likely"
                },
                {
                    "type": "event",
                    "event": "The monitors can be powered on.",
                    "change": "more likely"
                }
            ],
            [
                {
                    "type": "step",
                    "step": "Power on your monitors."
                },
                {
                    "type": "entity",
                    "entity": "monitors",
                    "attribute": "powered on",
                    "change": "more likely"
                },
                {
                    "type": "event",
                    "event": "The monitor displays content.",
                    "change": "more likely"
                }
            ],
            [
                {
                    "type": "step",
                    "step": "Power on your computer."
                },
                {
                    "type": "entity",
                    "entity": "compter",
                    "attribute": "powered on",
                    "change": "more likely"
                },
                {
                    "type": "event",
                    "event": "The monitor displays content.",
                    "change": "more likely"
                }
            ]
        ]
    },
    "211": {
        "goal": "Make spicy sauteed calamari",
        "annotator": "Chenming Cao",
        "steps": [
            [
                {
                    "type": "step",
                    "step": "Start."
                }
            ],
            [
                {
                    "type": "step",
                    "step": "Mix the salt, oils, chilis, garlic and scallions in a bowl."
                }
            ],
            [
                {
                    "type": "step",
                    "step": "Cut 3/4 pound of squid into 1/2 inch thick rings."
                }
            ],
            [
                {
                    "type": "step",
                    "step": "Add the calamari to the bowl and marinate it for 5 to 10 minutes."
                },
                {
                    "type": "entity",
                    "entity": "calamari rings",
                    "attribute": "marinated",
                    "change": "more likely"
                },
                {
                    "type": "event",
                    "event": "The calamari rings are savory.",
                    "change": "more likely"
                }
            ],
            [
                {
                    "type": "step",
                    "step": "Saute 1/2 of the calamari in a skillet over high for 1.5 to 2 minutes."
                },
                {
                    "type": "predicted_event",
                    "event": "The calamari rings are savory.",
                    "change": "more likely"
                }
            ],
            [
                {
                    "type": "step",
                    "step": "Transfer the calamari to a serving bowl and saute the remaining rings."
                },
                {
                    "type": "predicted_event",
                    "event": "The calamari rings are savory.",
                    "change": "more likely"
                }
            ],
            [
                {
                    "type": "step",
                    "step": "Serve the sauteed calamari with scallions and your favorite sides."
                }
            ]
        ]
    },
    "212": {
        "goal": "Make chicken noodle soup",
        "annotator": "Chenming Cao",
        "steps": [
            [
                {
                    "type": "step",
                    "step": "Start."
                }
            ],
            [
                {
                    "type": "step",
                    "step": "Add the chicken breasts, celery, carrots, onions, and parsley in a large pot."
                }
            ],
            [
                {
                    "type": "step",
                    "step": "Cover the ingredients with water and add seasonings."
                }
            ],
            [
                {
                    "type": "step",
                    "step": "Bring the ingredients to a boil and reduce the heat."
                },
                {
                    "type": "entity",
                    "entity": "inside of chicken",
                    "attribute": "cooked",
                    "change": "more likely"
                },
                {
                    "type": "event",
                    "event": "the chicken can be safely eaten",
                    "change": "more likely"
                }
            ],
            [
                {
                    "type": "step",
                    "step": "Remove the chicken and set it aside to cool."
                }
            ],
            [
                {
                    "type": "step",
                    "step": "Add bouillon cubes and allow them to dissolve by bringing the stock to a boil."
                }
            ],
            [
                {
                    "type": "step",
                    "step": "Pick the meat off the bone and set it aside."
                }
            ],
            [
                {
                    "type": "step",
                    "step": "Chop up the carrots, onions, and celery and saute them in a tablespoon of butter."
                }
            ],
            [
                {
                    "type": "step",
                    "step": "Add the chicken, carrots, celery, and onion into the stock and bring to a boil for 5-10 minutes."
                },
                {
                    "type": "entity",
                    "entity": "inside of chicken",
                    "attribute": "cooked",
                    "change": "more likely"
                },
                {
                    "type": "event",
                    "event": "the chicken can be safely eaten",
                    "change": "more likely"
                },
                {
                    "type": "predicted_event",
                    "event": "the chicken can be safely eaten",
                    "change": "more likely"
                }
            ],
            [
                {
                    "type": "step",
                    "step": "Add 2 cups of egg noodles and cook uncovered for 10-12 minutes."
                },
                {
                    "type": "entity",
                    "entity": "inside of chicken",
                    "attribute": "cooked",
                    "change": "more likely"
                },
                {
                    "type": "event",
                    "event": "the chicken can be safely eaten",
                    "change": "more likely"
                }
            ]
        ]
    },
    "213": {
        "goal": "Connect a Windows computer to a network using Wi-Fi",
        "annotator": "Chenming Cao",
        "steps": [
            [
                {
                    "type": "step",
                    "step": "Start."
                }
            ],
            [
                {
                    "type": "step",
                    "step": "Make sure your network is functional."
                }
            ],
            [
                {
                    "type": "step",
                    "step": "Click the \"Wi-Fi\" icon on the computer."
                },
                {
                    "type": "entity",
                    "entity": "the computer",
                    "attribute": "wifi turned on",
                    "change": "more likely"
                },
                {
                    "type": "event",
                    "event": "I can see the names of available Wi-Fi connections.",
                    "change": "more likely"
                },
                {
                    "type": "predicted_event",
                    "event": "I can see the names of available Wi-Fi connections.",
                    "change": "more likely"
                }
            ],
            [
                {
                    "type": "step",
                    "step": "Turn on Wi-Fi on the computer if necessary."
                },
                {
                    "type": "entity",
                    "entity": "the computer",
                    "attribute": "wifi turned on",
                    "change": "more likely"
                },
                {
                    "type": "event",
                    "event": "I can see the names of available Wi-Fi connections.",
                    "change": "more likely"
                },
                {
                    "type": "predicted_event",
                    "event": "I can use the computer to browse the internet.",
                    "change": "more likely"
                }
            ],
            [
                {
                    "type": "step",
                    "step": "Select your wireless network's name."
                }
            ],
            [
                {
                    "type": "step",
                    "step": "Click the \"Connect\" button."
                }
            ],
            [
                {
                    "type": "step",
                    "step": "Enter the network's password on the computer."
                }
            ],
            [
                {
                    "type": "step",
                    "step": "Click \"Next\" button."
                }
            ],
            [
                {
                    "type": "step",
                    "step": "Wait for the network to connect until it says \"Connected\" under the network name."
                },
                {
                    "type": "entity",
                    "entity": "the computer",
                    "attribute": "connected to the internet",
                    "change": "more likely"
                },
                {
                    "type": "event",
                    "event": "I can use the computer to browse the internet.",
                    "change": "more likely"
                }
            ]
        ]
    },
    "216": {
        "goal": "Make coffee",
        "annotator": "hasun won 6",
        "steps": [
            [
                {
                    "type": "step",
                    "step": "Start."
                }
            ],
            [
                {
                    "type": "step",
                    "step": "Grind coffee beans."
                }
            ],
            [
                {
                    "type": "step",
                    "step": "Place filter on the coffee maker."
                },
                {
                    "type": "entity",
                    "entity": "filter",
                    "attribute": "dry and clean",
                    "change": "more likely"
                },
                {
                    "type": "event",
                    "event": "The filter can be used to make coffee.",
                    "change": "more likely"
                }
            ],
            [
                {
                    "type": "step",
                    "step": "Put ground coffee beans inside the filter."
                },
                {
                    "type": "entity",
                    "entity": "filter",
                    "attribute": "dry and clean",
                    "change": "less likely"
                },
                {
                    "type": "event",
                    "event": "The filter can be used to make coffee.",
                    "change": "less likely"
                }
            ],
            [
                {
                    "type": "step",
                    "step": "Fill the coffee maker with water."
                },
                {
                    "type": "predicted_event",
                    "event": "The filter can be used to make coffee.",
                    "change": "more likely"
                }
            ],
            [
                {
                    "type": "step",
                    "step": "Turn on the coffee maker and wait until the coffee gets brewed."
                },
                {
                    "type": "entity",
                    "entity": "filter",
                    "attribute": "dry and clean",
                    "change": "less likely"
                },
                {
                    "type": "event",
                    "event": "The filter can be used to make coffee.",
                    "change": "less likely"
                }
            ],
            [
                {
                    "type": "step",
                    "step": "Pour the brewed coffee out."
                }
            ]
        ]
    },
    "217": {
        "goal": "Clean a mechanical keyboard ",
        "annotator": "hasun won 6",
        "steps": [
            [
                {
                    "type": "step",
                    "step": "Start."
                }
            ],
            [
                {
                    "type": "step",
                    "step": "Detach keyboard from pc."
                },
                {
                    "type": "entity",
                    "entity": "keyboard",
                    "attribute": "connected to PC",
                    "change": "less likely"
                },
                {
                    "type": "event",
                    "event": "I can type words into the pc.",
                    "change": "less likely"
                },
                {
                    "type": "predicted_event",
                    "event": "I can type words into the pc.",
                    "change": "less likely"
                },
                {
                    "type": "predicted_event",
                    "event": "The mechanical switches are visible.",
                    "change": "more likely"
                }
            ],
            [
                {
                    "type": "step",
                    "step": "Remove keycaps from the keyboard."
                },
                {
                    "type": "entity",
                    "entity": "keyboard",
                    "attribute": "fully assembled",
                    "change": "less likely"
                },
                {
                    "type": "event",
                    "event": "The mechanical switches are visible.",
                    "change": "more likely"
                }
            ],
            [
                {
                    "type": "step",
                    "step": "Use canned air to blow out dust."
                }
            ],
            [
                {
                    "type": "step",
                    "step": "Remove gunks with cotton swabs."
                }
            ],
            [
                {
                    "type": "step",
                    "step": "Clean each key with clean wipes. "
                }
            ],
            [
                {
                    "type": "step",
                    "step": "Clean keyboard frame with clean wipes. "
                }
            ],
            [
                {
                    "type": "step",
                    "step": "Attach keycaps to the keyboard."
                },
                {
                    "type": "entity",
                    "entity": "keyboard",
                    "attribute": "fully assembled",
                    "change": "more likely"
                },
                {
                    "type": "event",
                    "event": "The mechanical switches are visible.",
                    "change": "less likely"
                }
            ],
            [
                {
                    "type": "step",
                    "step": "Attach keyboard to pc."
                },
                {
                    "type": "entity",
                    "entity": "keyboard",
                    "attribute": "connected to PC",
                    "change": "more likely"
                },
                {
                    "type": "event",
                    "event": "I can type words into the pc.",
                    "change": "more likely"
                }
            ]
        ]
    },
    "218": {
        "goal": "Pack a backpack for hiking",
        "annotator": "hasun won 6",
        "steps": [
            [
                {
                    "type": "step",
                    "step": "Start."
                }
            ],
            [
                {
                    "type": "step",
                    "step": "Place infrequently used and bulky items on the bottom."
                },
                {
                    "type": "predicted_event",
                    "event": "I can find essential tools in the bag.",
                    "change": "more likely"
                }
            ],
            [
                {
                    "type": "step",
                    "step": "Put heaviest items like cookware in the middle."
                },
                {
                    "type": "predicted_event",
                    "event": "I can find essential tools in the bag.",
                    "change": "more likely"
                }
            ],
            [
                {
                    "type": "step",
                    "step": "Place light, infrequently used items on top of heavy items."
                },
                {
                    "type": "predicted_event",
                    "event": "I can find essential tools in the bag.",
                    "change": "more likely"
                }
            ],
            [
                {
                    "type": "step",
                    "step": "Put light, frenquently used essentials on the top."
                },
                {
                    "type": "entity",
                    "entity": "bag",
                    "attribute": "equiped with essential items",
                    "change": "more likely"
                },
                {
                    "type": "event",
                    "event": "I can find essential tools in the bag.",
                    "change": "more likely"
                },
                {
                    "type": "predicted_event",
                    "event": "I can find essential tools in the bag.",
                    "change": "more likely"
                }
            ],
            [
                {
                    "type": "step",
                    "step": "Fill gaps with paddings like extra clothes."
                },
                {
                    "type": "predicted_event",
                    "event": "I can find essential tools in the bag.",
                    "change": "more likely"
                }
            ],
            [
                {
                    "type": "step",
                    "step": "Put small items and water inside the pocket."
                },
                {
                    "type": "predicted_event",
                    "event": "I can find essential tools in the bag.",
                    "change": "more likely"
                }
            ],
            [
                {
                    "type": "step",
                    "step": "Attach large items that can't fit inside on top of the backpack."
                },
                {
                    "type": "predicted_event",
                    "event": "I can find essential tools in the bag.",
                    "change": "more likely"
                }
            ],
            [
                {
                    "type": "step",
                    "step": "Put waterproof cover over backpack to protect the backpack."
                },
                {
                    "type": "predicted_event",
                    "event": "I can find essential tools in the bag.",
                    "change": "more likely"
                }
            ]
        ]
    },
    "225": {
        "goal": "Change a lightbulb",
        "annotator": "hasun won 6",
        "steps": [
            [
                {
                    "type": "step",
                    "step": "Start."
                }
            ],
            [
                {
                    "type": "step",
                    "step": "Make sure the power is turned off. "
                },
                {
                    "type": "entity",
                    "entity": "the electricity",
                    "attribute": "running",
                    "change": "less likely"
                },
                {
                    "type": "event",
                    "event": "It is safe to work on the light.",
                    "change": "more likely"
                },
                {
                    "type": "predicted_event",
                    "event": "It is safe to work on the light.",
                    "change": "more likely"
                }
            ],
            [
                {
                    "type": "step",
                    "step": "Remove bulb out of its socket. "
                }
            ],
            [
                {
                    "type": "step",
                    "step": "Note the bulb type and brightness."
                }
            ],
            [
                {
                    "type": "step",
                    "step": "Purchase a new, compatible lightbulb. "
                },
                {
                    "type": "predicted_event",
                    "event": "It is safe to work on the light.",
                    "change": "less likely"
                }
            ],
            [
                {
                    "type": "step",
                    "step": "Make sure the power is turned off again."
                },
                {
                    "type": "entity",
                    "entity": "the electricity",
                    "attribute": "running",
                    "change": "less likely"
                },
                {
                    "type": "event",
                    "event": "It is safe to work on the light.",
                    "change": "more likely"
                }
            ],
            [
                {
                    "type": "step",
                    "step": "Place the new bulb into the empty socket."
                }
            ],
            [
                {
                    "type": "step",
                    "step": "Turn on the power to examine if bulb is working."
                },
                {
                    "type": "entity",
                    "entity": "the electricity",
                    "attribute": "running",
                    "change": "more likely"
                },
                {
                    "type": "event",
                    "event": "It is safe to work on the light.",
                    "change": "less likely"
                }
            ],
            [
                {
                    "type": "step",
                    "step": "Discard old lightbulb. "
                }
            ]
        ]
    },
    "228": {
        "goal": "Make popsicles",
        "annotator": "Benjamin Thanyawatpokin",
        "steps": [
            [
                {
                    "type": "step",
                    "step": "Start."
                }
            ],
            [
                {
                    "type": "step",
                    "step": "Buy popsicle molds."
                },
                {
                    "type": "predicted_event",
                    "event": "people can taste fruit flavor from the mixture.",
                    "change": "more likely"
                }
            ],
            [
                {
                    "type": "step",
                    "step": "Buy fruit flavoring."
                }
            ],
            [
                {
                    "type": "step",
                    "step": "Create fruit flavor mixture with water in a bowl."
                },
                {
                    "type": "entity",
                    "entity": "mixture",
                    "attribute": "fruit-flavored",
                    "change": "more likely"
                },
                {
                    "type": "event",
                    "event": "people can taste fruit flavor from the mixture.",
                    "change": "more likely"
                }
            ],
            [
                {
                    "type": "step",
                    "step": "Fill popsicle molds with fruit mixture 3/4 full."
                },
                {
                    "type": "predicted_event",
                    "event": "I can lift the popsicle with the stick.",
                    "change": "more likely"
                }
            ],
            [
                {
                    "type": "step",
                    "step": "Cover molds with aluminum foil."
                }
            ],
            [
                {
                    "type": "step",
                    "step": "Push a popsicle stick into the middle of the top of the mold."
                },
                {
                    "type": "entity",
                    "entity": "popsicle stick",
                    "attribute": "attached to the popsicle",
                    "change": "more likely"
                },
                {
                    "type": "event",
                    "event": "I can lift the popsicle with the stick.",
                    "change": "more likely"
                }
            ],
            [
                {
                    "type": "step",
                    "step": "Freeze overnight."
                },
                {
                    "type": "entity",
                    "entity": "popsicle stick",
                    "attribute": "attached to the popsicle",
                    "change": "more likely"
                },
                {
                    "type": "event",
                    "event": "I can lift the popsicle with the stick.",
                    "change": "more likely"
                }
            ],
            [
                {
                    "type": "step",
                    "step": "Remove from molds and eat."
                }
            ]
        ]
    },
    "229": {
        "goal": "Make mashed potatoes",
        "annotator": "Benjamin Thanyawatpokin",
        "steps": [
            [
                {
                    "type": "step",
                    "step": "Start."
                }
            ],
            [
                {
                    "type": "step",
                    "step": "Buy any kind of starchy potato."
                }
            ],
            [
                {
                    "type": "step",
                    "step": "Boil potatoes in a large pot about 20 to 30 minutes."
                },
                {
                    "type": "entity",
                    "entity": "potatoes",
                    "attribute": "boiled",
                    "change": "more likely"
                }
            ],
            [
                {
                    "type": "step",
                    "step": "Salt water while they are boiling."
                },
                {
                    "type": "entity",
                    "entity": "potatoes",
                    "attribute": "been seasoned",
                    "change": "more likely"
                }
            ],
            [
                {
                    "type": "step",
                    "step": "Drain water from potatos."
                }
            ],
            [
                {
                    "type": "step",
                    "step": "Peel potatoes while they are hot."
                },
                {
                    "type": "entity",
                    "entity": "potatoes",
                    "attribute": "have the skin on them",
                    "change": "less likely"
                }
            ],
            [
                {
                    "type": "step",
                    "step": "In a separate pan, heat butter and add potatoes."
                }
            ],
            [
                {
                    "type": "step",
                    "step": "Use a potato masher to break up potatoes."
                },
                {
                    "type": "entity",
                    "entity": "potatoes",
                    "attribute": "mashed",
                    "change": "more likely"
                }
            ],
            [
                {
                    "type": "step",
                    "step": "Add milk while stirring potatoes until it becomes your desired consistency."
                }
            ],
            [
                {
                    "type": "step",
                    "step": "Adjust seasoning of potatoes if necessary."
                }
            ],
            [
                {
                    "type": "step",
                    "step": "Serve mashed potatoes."
                }
            ]
        ]
    },
    "230": {
        "goal": "Print a design on a t-shirt",
        "annotator": "Benjamin Thanyawatpokin",
        "steps": [
            [
                {
                    "type": "step",
                    "step": "Start."
                }
            ],
            [
                {
                    "type": "step",
                    "step": "Buy t-shirt transfer paper "
                }
            ],
            [
                {
                    "type": "step",
                    "step": "Select a high-quality image for the t-shirt design."
                },
                {
                    "type": "predicted_event",
                    "event": "The shirt is hot.",
                    "change": "more likely"
                }
            ],
            [
                {
                    "type": "step",
                    "step": "Mirror the image for light-colored shirts."
                },
                {
                    "type": "predicted_event",
                    "event": "The shirt is hot.",
                    "change": "less likely"
                }
            ],
            [
                {
                    "type": "step",
                    "step": "Print out the design."
                },
                {
                    "type": "entity",
                    "entity": "image",
                    "attribute": "printed out",
                    "change": "more likely"
                }
            ],
            [
                {
                    "type": "step",
                    "step": "Cut out the image."
                }
            ],
            [
                {
                    "type": "step",
                    "step": "Cover a hard, flat surface with a pillowcase."
                }
            ],
            [
                {
                    "type": "step",
                    "step": "Iron a blank t-shirt on the surface until it is flat."
                },
                {
                    "type": "entity",
                    "entity": "shirt",
                    "attribute": "ready to have an image ironed onto it",
                    "change": "more likely"
                },
                {
                    "type": "entity",
                    "entity": "t-shirt",
                    "attribute": "ironed",
                    "change": "more likely"
                },
                {
                    "type": "event",
                    "event": "The shirt is hot.",
                    "change": "more likely"
                }
            ],
            [
                {
                    "type": "step",
                    "step": "Place paper on the flat t-shirt and iron the paper into the shirt."
                }
            ],
            [
                {
                    "type": "step",
                    "step": "Let the area cool and peel the paper off."
                },
                {
                    "type": "event",
                    "event": "The shirt is hot.",
                    "change": "less likely"
                }
            ]
        ]
    },
    "231": {
        "goal": "Create a fire with a hand drill",
        "annotator": "Benjamin Thanyawatpokin",
        "steps": [
            [
                {
                    "type": "step",
                    "step": "Start."
                }
            ],
            [
                {
                    "type": "step",
                    "step": "Find tinder or dry plant material."
                }
            ],
            [
                {
                    "type": "step",
                    "step": "Find a flat piece of wood."
                }
            ],
            [
                {
                    "type": "step",
                    "step": "Use a knife to cut a v-shaped hole in the wood."
                }
            ],
            [
                {
                    "type": "step",
                    "step": "Place a small flat piece of wood under the hole."
                }
            ],
            [
                {
                    "type": "step",
                    "step": "Find a thin stick two feet long and about a half-inch diameter."
                },
                {
                    "type": "predicted_event",
                    "event": "The friction causes a squeaky noise.",
                    "change": "more likely"
                }
            ],
            [
                {
                    "type": "step",
                    "step": "Hold the hand drill between both palms and roll it back and forth."
                },
                {
                    "type": "entity",
                    "entity": "hand drill",
                    "attribute": "grinding wood",
                    "change": "more likely"
                },
                {
                    "type": "event",
                    "event": "The friction causes a squeaky noise.",
                    "change": "more likely"
                },
                {
                    "type": "predicted_event",
                    "event": "The stick is red on the end.",
                    "change": "more likely"
                },
                {
                    "type": "predicted_event",
                    "event": "It's dangerous to touch the tinder.",
                    "change": "more likely"
                }
            ],
            [
                {
                    "type": "step",
                    "step": "Continue to roll the stick faster and faster."
                },
                {
                    "type": "predicted_event",
                    "event": "It's dangerous to touch the tinder.",
                    "change": "less likely"
                }
            ],
            [
                {
                    "type": "step",
                    "step": "When an ember forms, roll it onto the flat piece of wood."
                },
                {
                    "type": "entity",
                    "entity": "hand drill",
                    "attribute": "grinding wood",
                    "change": "less likely"
                },
                {
                    "type": "event",
                    "event": "The friction causes a squeaky noise.",
                    "change": "less likely"
                },
                {
                    "type": "entity",
                    "entity": "ember",
                    "attribute": "formed",
                    "change": "more likely"
                },
                {
                    "type": "event",
                    "event": "The stick is red on the end.",
                    "change": "more likely"
                }
            ],
            [
                {
                    "type": "step",
                    "step": "Place the ember into the tinder."
                },
                {
                    "type": "entity",
                    "entity": "tinder",
                    "attribute": "burning",
                    "change": "more likely"
                },
                {
                    "type": "event",
                    "event": "It's dangerous to touch the tinder.",
                    "change": "more likely"
                }
            ],
            [
                {
                    "type": "step",
                    "step": "Continue adding more tinder and wood until a fire starts."
                }
            ]
        ]
    },
    "233": {
        "goal": "Shuck an oyster",
        "annotator": "Benjamin Thanyawatpokin",
        "steps": [
            [
                {
                    "type": "step",
                    "step": "Start."
                }
            ],
            [
                {
                    "type": "step",
                    "step": "Put on gloves."
                }
            ],
            [
                {
                    "type": "step",
                    "step": "Clean oyster shell."
                },
                {
                    "type": "predicted_event",
                    "event": "The tip of the knife can be seen.",
                    "change": "more likely"
                }
            ],
            [
                {
                    "type": "step",
                    "step": "Grab oyster, cup-side down."
                },
                {
                    "type": "predicted_event",
                    "event": "Eating the oyster makes one sick.",
                    "change": "more likely"
                }
            ],
            [
                {
                    "type": "step",
                    "step": "Insert knife into hinge of oyster."
                },
                {
                    "type": "entity",
                    "entity": "knife",
                    "attribute": "in the oyster shell",
                    "change": "more likely"
                },
                {
                    "type": "event",
                    "event": "The tip of the knife can be seen.",
                    "change": "less likely"
                }
            ],
            [
                {
                    "type": "step",
                    "step": "Run blade along top of shell."
                },
                {
                    "type": "predicted_event",
                    "event": "Eating the oyster makes one sick.",
                    "change": "less likely"
                }
            ],
            [
                {
                    "type": "step",
                    "step": "Twist the knife to lever open the shell."
                },
                {
                    "type": "entity",
                    "entity": "knife",
                    "attribute": "in the oyster shell",
                    "change": "less likely"
                },
                {
                    "type": "event",
                    "event": "The tip of the knife can be seen.",
                    "change": "more likely"
                }
            ],
            [
                {
                    "type": "step",
                    "step": "Check oyster meat for sand or grit, clean out."
                },
                {
                    "type": "entity",
                    "entity": "oyster meat",
                    "attribute": "clean",
                    "change": "more likely"
                },
                {
                    "type": "event",
                    "event": "Eating the oyster makes one sick.",
                    "change": "less likely"
                }
            ],
            [
                {
                    "type": "step",
                    "step": "Serve oysters."
                }
            ]
        ]
    },
    "235": {
        "goal": "Change a car's oil filter",
        "annotator": "Benjamin Thanyawatpokin",
        "steps": [
            [
                {
                    "type": "step",
                    "step": "Start."
                }
            ],
            [
                {
                    "type": "step",
                    "step": "Put pan under oil plug."
                },
                {
                    "type": "predicted_event",
                    "event": "Excessive oil can be seen on the filter surface.",
                    "change": "more likely"
                }
            ],
            [
                {
                    "type": "step",
                    "step": "Loosen oil cap and pull oil plug on engine."
                },
                {
                    "type": "predicted_event",
                    "event": "Adding oil to the engine causes overflow.",
                    "change": "less likely"
                }
            ],
            [
                {
                    "type": "step",
                    "step": "Drain completely."
                },
                {
                    "type": "entity",
                    "entity": "oil",
                    "attribute": "in the engine",
                    "change": "less likely"
                },
                {
                    "type": "event",
                    "event": "Adding oil to the engine causes overflow.",
                    "change": "less likely"
                }
            ],
            [
                {
                    "type": "step",
                    "step": "Replace oil plug and move pan under oil filter."
                }
            ],
            [
                {
                    "type": "step",
                    "step": "Screw off oil filter by hand or use filter wrench."
                }
            ],
            [
                {
                    "type": "step",
                    "step": "Put old oil filter in pan and let drain for 24 hours."
                },
                {
                    "type": "entity",
                    "entity": "oil filter",
                    "attribute": "have oil in it",
                    "change": "less likely"
                },
                {
                    "type": "event",
                    "event": "Excessive oil can be seen on the filter surface.",
                    "change": "less likely"
                }
            ],
            [
                {
                    "type": "step",
                    "step": "Buy new oil filter."
                }
            ],
            [
                {
                    "type": "step",
                    "step": "Lubricate new oil filter gasket."
                }
            ],
            [
                {
                    "type": "step",
                    "step": "Screw on new oil filter until it contacts engine block."
                }
            ],
            [
                {
                    "type": "step",
                    "step": "Fill engine with new oil."
                },
                {
                    "type": "entity",
                    "entity": "oil",
                    "attribute": "in the engine",
                    "change": "more likely"
                },
                {
                    "type": "event",
                    "event": "Adding oil to the engine causes overflow.",
                    "change": "more likely"
                }
            ]
        ]
    },
    "237": {
        "goal": "Clean your bike chain",
        "annotator": "christopher woerndle",
        "steps": [
            [
                {
                    "type": "step",
                    "step": "Start."
                }
            ],
            [
                {
                    "type": "step",
                    "step": "Fix the bike on a stand"
                },
                {
                    "type": "entity",
                    "entity": "bike",
                    "attribute": "fixed",
                    "change": "more likely"
                },
                {
                    "type": "event",
                    "event": "I ride the bike.",
                    "change": "less likely"
                },
                {
                    "type": "predicted_event",
                    "event": "I ride the bike.",
                    "change": "less likely"
                }
            ],
            [
                {
                    "type": "step",
                    "step": "Grab a hose or bucket of water and flush the biggest dirt of the chain"
                },
                {
                    "type": "entity",
                    "entity": "the bike chain",
                    "attribute": "wet",
                    "change": "more likely"
                },
                {
                    "type": "event",
                    "event": "There is water dripping from the bike chain.",
                    "change": "more likely"
                },
                {
                    "type": "predicted_event",
                    "event": "There is water dripping from the bike chain.",
                    "change": "more likely"
                }
            ],
            [
                {
                    "type": "step",
                    "step": "Take an old piece of cloth and clean pick the dirt out of the chain"
                }
            ],
            [
                {
                    "type": "step",
                    "step": "Grab another cloth soaked with water and soap and clean the chain while moving the pedals backwards"
                },
                {
                    "type": "predicted_event",
                    "event": "There is water dripping from the bike chain.",
                    "change": "less likely"
                }
            ],
            [
                {
                    "type": "step",
                    "step": "Take a thrid piece of cloth and dry the chain"
                },
                {
                    "type": "entity",
                    "entity": "the bike chain",
                    "attribute": "wet",
                    "change": "less likely"
                },
                {
                    "type": "event",
                    "event": "There is water dripping from the bike chain.",
                    "change": "less likely"
                }
            ],
            [
                {
                    "type": "step",
                    "step": "Keep spinning the chain backwards while applying new oil and remove access oil with the last cloth"
                },
                {
                    "type": "predicted_event",
                    "event": "I ride the bike.",
                    "change": "more likely"
                }
            ]
        ]
    },
    "238": {
        "goal": "Open a bank account",
        "annotator": "christopher woerndle",
        "steps": [
            [
                {
                    "type": "step",
                    "step": "Start."
                }
            ],
            [
                {
                    "type": "step",
                    "step": "Choose a bank"
                }
            ],
            [
                {
                    "type": "step",
                    "step": "Visit the bank or its website"
                }
            ],
            [
                {
                    "type": "step",
                    "step": "Choose your banking product"
                }
            ],
            [
                {
                    "type": "step",
                    "step": "Provide your information and documents"
                },
                {
                    "type": "predicted_event",
                    "event": "I transfer money with my bank account.",
                    "change": "more likely"
                }
            ],
            [
                {
                    "type": "step",
                    "step": "Confirm that the account is opened"
                },
                {
                    "type": "entity",
                    "entity": "the bank account",
                    "attribute": "open",
                    "change": "more likely"
                },
                {
                    "type": "event",
                    "event": "I transfer money with my bank account.",
                    "change": "more likely"
                }
            ]
        ]
    },
    "240": {
        "goal": "Create your own app",
        "annotator": "christopher woerndle",
        "steps": [
            [
                {
                    "type": "step",
                    "step": "Start."
                }
            ],
            [
                {
                    "type": "step",
                    "step": "Generate an app idea"
                }
            ],
            [
                {
                    "type": "step",
                    "step": "Do competitive market research"
                }
            ],
            [
                {
                    "type": "step",
                    "step": "Write out the features for your app"
                }
            ],
            [
                {
                    "type": "step",
                    "step": "Make design mockups of your app"
                }
            ],
            [
                {
                    "type": "step",
                    "step": "Create your app's graphic design"
                },
                {
                    "type": "predicted_event",
                    "event": "My friends download and try out my app.",
                    "change": "more likely"
                }
            ],
            [
                {
                    "type": "step",
                    "step": "Submit your app to the App Store"
                },
                {
                    "type": "entity",
                    "entity": "the app",
                    "attribute": "online",
                    "change": "more likely"
                },
                {
                    "type": "event",
                    "event": "My friends download and try out my app.",
                    "change": "more likely"
                },
                {
                    "type": "predicted_event",
                    "event": "My friends download and try out my app.",
                    "change": "more likely"
                }
            ]
        ]
    },
    "241": {
        "goal": "Start your own podcast",
        "annotator": "christopher woerndle",
        "steps": [
            [
                {
                    "type": "step",
                    "step": "Start."
                }
            ],
            [
                {
                    "type": "step",
                    "step": "Structure your show."
                },
                {
                    "type": "predicted_event",
                    "event": "People can watch my podcast.",
                    "change": "more likely"
                }
            ],
            [
                {
                    "type": "step",
                    "step": "Frame your episodes with an intro and outro."
                },
                {
                    "type": "predicted_event",
                    "event": "People can watch my podcast.",
                    "change": "more likely"
                }
            ],
            [
                {
                    "type": "step",
                    "step": "Decide on including an interview."
                },
                {
                    "type": "predicted_event",
                    "event": "People can watch my podcast.",
                    "change": "more likely"
                }
            ],
            [
                {
                    "type": "step",
                    "step": "Practice hosting skills."
                },
                {
                    "type": "predicted_event",
                    "event": "People can watch my podcast.",
                    "change": "more likely"
                }
            ],
            [
                {
                    "type": "step",
                    "step": "Upload your podcast to the internet."
                },
                {
                    "type": "entity",
                    "entity": "podcast",
                    "attribute": "online",
                    "change": "more likely"
                },
                {
                    "type": "event",
                    "event": "People can watch my podcast.",
                    "change": "more likely"
                },
                {
                    "type": "predicted_event",
                    "event": "People can watch my podcast.",
                    "change": "more likely"
                }
            ]
        ]
    },
    "242": {
        "goal": "Do Acrylic Nails Yourself",
        "annotator": "christopher woerndle",
        "steps": [
            [
                {
                    "type": "step",
                    "step": "Start."
                }
            ],
            [
                {
                    "type": "step",
                    "step": "Getting The Stuff You Need"
                }
            ],
            [
                {
                    "type": "step",
                    "step": "Preparing Your Nails"
                }
            ],
            [
                {
                    "type": "step",
                    "step": "Putting On The Acrylics"
                },
                {
                    "type": "entity",
                    "entity": "the nails",
                    "attribute": "wet",
                    "change": "more likely"
                },
                {
                    "type": "event",
                    "event": "I touch my phone with my nails.",
                    "change": "less likely"
                },
                {
                    "type": "predicted_event",
                    "event": "I touch my phone with my nails.",
                    "change": "more likely"
                }
            ],
            [
                {
                    "type": "step",
                    "step": "Finishing Up Your Nails and let them dry."
                },
                {
                    "type": "entity",
                    "entity": "the nails",
                    "attribute": "wet",
                    "change": "less likely"
                },
                {
                    "type": "event",
                    "event": "I touch my phone with my nails.",
                    "change": "more likely"
                }
            ]
        ]
    },
    "248": {
        "goal": "parallel park",
        "annotator": "james wrightson",
        "steps": [
            [
                {
                    "step": "Start"
                }
            ],
            [
                {
                    "type": "step",
                    "step": "Look around for a space"
                }
            ],
            [
                {
                    "type": "step",
                    "step": "Ensure it is a safe, legal parking space"
                },
                {
                    "type": "entity",
                    "entity": "parking space",
                    "attribute": "decided",
                    "change": "more likely"
                },
                {
                    "type": "event",
                    "event": "I know where to park.",
                    "change": "more likely"
                }
            ],
            [
                {
                    "type": "step",
                    "step": "Turn on your signal and position yourself to back in"
                }
            ],
            [
                {
                    "type": "step",
                    "step": "Begin backing up"
                }
            ],
            [
                {
                    "type": "step",
                    "step": "Back most of the way in"
                },
                {
                    "type": "entity",
                    "entity": "the car",
                    "attribute": "backed in",
                    "change": "more likely"
                },
                {
                    "type": "event",
                    "event": "More than half of the car is in the parking space.",
                    "change": "more likely"
                }
            ],
            [
                {
                    "type": "step",
                    "step": "Straighten it out as you finish pulling in"
                },
                {
                    "type": "entity",
                    "entity": "car",
                    "attribute": "straightened",
                    "change": "more likely"
                },
                {
                    "type": "event",
                    "event": "The car is parallel to the curb.",
                    "change": "more likely"
                }
            ],
            [
                {
                    "type": "step",
                    "step": "Center the vehicle in the space"
                }
            ]
        ]
    },
    "250": {
        "goal": "shave your face",
        "annotator": "james wrightson",
        "steps": [
            [
                {
                    "step": "Start"
                }
            ],
            [
                {
                    "type": "step",
                    "step": "Trim any long hairs with an electric trimmer"
                }
            ],
            [
                {
                    "type": "step",
                    "step": "Apply shaving cream to face"
                },
                {
                    "type": "entity",
                    "entity": "your face",
                    "attribute": "covered with white foam",
                    "change": "more likely"
                },
                {
                    "type": "event",
                    "event": "You look socially acceptable.",
                    "change": "less likely"
                },
                {
                    "type": "predicted_event",
                    "event": "You look socially acceptable.",
                    "change": "more likely"
                }
            ],
            [
                {
                    "type": "step",
                    "step": "Take a razor and wet it with warm water"
                }
            ],
            [
                {
                    "type": "step",
                    "step": "Gently take razor to face and shave off facial hair in an upwards motion"
                }
            ],
            [
                {
                    "type": "step",
                    "step": "Repeat for any part of face with hair remaining"
                }
            ],
            [
                {
                    "type": "step",
                    "step": "Rinse off remaining shaving cream from face"
                },
                {
                    "type": "entity",
                    "entity": "your face",
                    "attribute": "covered with white foam",
                    "change": "less likely"
                },
                {
                    "type": "event",
                    "event": "You look socially acceptable.",
                    "change": "more likely"
                }
            ],
            [
                {
                    "type": "step",
                    "step": "Apply after shave to face"
                }
            ]
        ]
    },
    "251": {
        "goal": "start a campfire",
        "annotator": "james wrightson",
        "steps": [
            [
                {
                    "step": "Start"
                }
            ],
            [
                {
                    "type": "step",
                    "step": "Find or build a fire ring"
                }
            ],
            [
                {
                    "type": "step",
                    "step": "Gather fire wood"
                }
            ],
            [
                {
                    "type": "step",
                    "step": "Place the fire wood in the fire ring in a pyramid shape"
                },
                {
                    "type": "predicted_event",
                    "event": "The fire is a potential hazard.",
                    "change": "more likely"
                }
            ],
            [
                {
                    "type": "step",
                    "step": "Ignite the wood with a match"
                },
                {
                    "type": "entity",
                    "entity": "wood",
                    "attribute": "ignited",
                    "change": "more likely"
                },
                {
                    "type": "event",
                    "event": "The fire is a potential hazard.",
                    "change": "more likely"
                }
            ],
            [
                {
                    "type": "step",
                    "step": "Add fuel to the fire ring"
                },
                {
                    "type": "predicted_event",
                    "event": "The fire is a potential hazard.",
                    "change": "less likely"
                }
            ],
            [
                {
                    "type": "step",
                    "step": "Extinguish"
                },
                {
                    "type": "entity",
                    "entity": "wood",
                    "attribute": "ignited",
                    "change": "less likely"
                },
                {
                    "type": "event",
                    "event": "The fire is a potential hazard.",
                    "change": "less likely"
                }
            ]
        ]
    },
    "253": {
        "goal": "Shoot a bow and arrow",
        "annotator": "james wrightson",
        "steps": [
            [
                {
                    "step": "Start"
                }
            ],
            [
                {
                    "type": "step",
                    "step": "Get in a stance"
                },
                {
                    "type": "predicted_event",
                    "event": "There is tension in the bow.",
                    "change": "more likely"
                }
            ],
            [
                {
                    "type": "step",
                    "step": "Nock the arrow"
                },
                {
                    "type": "predicted_event",
                    "event": "There is tension in the bow.",
                    "change": "less likely"
                }
            ],
            [
                {
                    "type": "step",
                    "step": "Grasp the bow string"
                }
            ],
            [
                {
                    "type": "step",
                    "step": "Ready your bow hand"
                }
            ],
            [
                {
                    "type": "step",
                    "step": "Ready your bow arm"
                }
            ],
            [
                {
                    "type": "step",
                    "step": "Draw the bow"
                },
                {
                    "type": "entity",
                    "entity": "the bow",
                    "attribute": "pulled back",
                    "change": "more likely"
                },
                {
                    "type": "event",
                    "event": "There is tension in the bow.",
                    "change": "more likely"
                }
            ],
            [
                {
                    "type": "step",
                    "step": "Aim at an object"
                }
            ],
            [
                {
                    "type": "step",
                    "step": "Release arrow"
                },
                {
                    "type": "entity",
                    "entity": "the bow",
                    "attribute": "pulled back",
                    "change": "less likely"
                },
                {
                    "type": "event",
                    "event": "There is tension in the bow.",
                    "change": "less likely"
                }
            ]
        ]
    },
    "254": {
        "goal": "Putting up a Christmas Tree",
        "annotator": "james wrightson",
        "steps": [
            [
                {
                    "step": "Start"
                }
            ],
            [
                {
                    "type": "step",
                    "step": "Choose a tree"
                },
                {
                    "type": "predicted_event",
                    "event": "The tree is vertical to the ground.",
                    "change": "more likely"
                }
            ],
            [
                {
                    "type": "step",
                    "step": "Cut the stump so that the tree can fit indoors"
                },
                {
                    "type": "entity",
                    "entity": "the tree",
                    "attribute": "standing up",
                    "change": "less likely"
                },
                {
                    "type": "event",
                    "event": "The tree is vertical to the ground.",
                    "change": "less likely"
                }
            ],
            [
                {
                    "type": "step",
                    "step": "Bring the tree into the desired indoor location"
                }
            ],
            [
                {
                    "type": "step",
                    "step": "Anchor tree in a stand"
                },
                {
                    "type": "entity",
                    "entity": "the tree",
                    "attribute": "standing up",
                    "change": "more likely"
                },
                {
                    "type": "event",
                    "event": "The tree is vertical to the ground.",
                    "change": "less likely"
                }
            ],
            [
                {
                    "type": "step",
                    "step": "Put lights on the tree"
                }
            ],
            [
                {
                    "type": "step",
                    "step": "Put ornaments on the tree"
                }
            ]
        ]
    },
    "256": {
        "goal": "plant a garden",
        "annotator": "nguyen vo",
        "steps": [
            [
                {
                    "step": "Start"
                }
            ],
            [
                {
                    "type": "step",
                    "step": "Pick a sunny location with well-drained soil."
                }
            ],
            [
                {
                    "type": "step",
                    "step": "Map out a space for your garden."
                },
                {
                    "type": "predicted_event",
                    "event": "Plants will grow from the soil.",
                    "change": "more likely"
                }
            ],
            [
                {
                    "type": "step",
                    "step": "Plan your garden layout."
                }
            ],
            [
                {
                    "type": "step",
                    "step": "Gather your basic garden supplies."
                },
                {
                    "type": "predicted_event",
                    "event": "The soil can be easily flaked.",
                    "change": "less likely"
                },
                {
                    "type": "predicted_event",
                    "event": "Plants will grow from the soil.",
                    "change": "more likely"
                }
            ],
            [
                {
                    "type": "step",
                    "step": "Level the soil and add fertilizer or compost."
                },
                {
                    "type": "entity",
                    "entity": "the soil",
                    "attribute": "wet",
                    "change": "more likely"
                },
                {
                    "type": "event",
                    "event": "The soil can be easily flaked.",
                    "change": "more likely"
                }
            ],
            [
                {
                    "type": "step",
                    "step": "Sow your seeds or plant your starts."
                },
                {
                    "type": "entity",
                    "entity": "the seed",
                    "attribute": "planted",
                    "change": "more likely"
                },
                {
                    "type": "event",
                    "event": "Plants will grow from the soil.",
                    "change": "more likely"
                }
            ],
            [
                {
                    "type": "step",
                    "step": "Keep the soil in your garden moist."
                }
            ],
            [
                {
                    "type": "step",
                    "step": "Pull weeds at least a few times a week."
                }
            ]
        ]
    },
    "262": {
        "goal": "Remove a Jar Label",
        "annotator": "nguyen vo",
        "steps": [
            [
                {
                    "step": "Start"
                }
            ],
            [
                {
                    "type": "step",
                    "step": "Fill a sink bucket with hot water"
                },
                {
                    "type": "entity",
                    "entity": "sink",
                    "attribute": "filled with water",
                    "change": "more likely"
                },
                {
                    "type": "event",
                    "event": "I wash my hands using the sink.",
                    "change": "less likely"
                },
                {
                    "type": "predicted_event",
                    "event": "I wash my hands using the sink.",
                    "change": "more likely"
                }
            ],
            [
                {
                    "type": "step",
                    "step": "Add a few squirts of dish soap"
                },
                {
                    "type": "predicted_event",
                    "event": "The label becomes soggy.",
                    "change": "more likely"
                }
            ],
            [
                {
                    "type": "step",
                    "step": "Add in a few cups of white vinegar"
                },
                {
                    "type": "predicted_event",
                    "event": "The jar has a clear surface.",
                    "change": "more likely"
                }
            ],
            [
                {
                    "type": "step",
                    "step": "Place the jars inside the sink"
                },
                {
                    "type": "entity",
                    "entity": "label",
                    "attribute": "wet",
                    "change": "more likely"
                },
                {
                    "type": "event",
                    "event": "The label becomes soggy.",
                    "change": "more likely"
                }
            ],
            [
                {
                    "type": "step",
                    "step": "Wait several minutes"
                }
            ],
            [
                {
                    "type": "step",
                    "step": "Take the jar out of the water and peel the label off"
                },
                {
                    "type": "entity",
                    "entity": "the label",
                    "attribute": "removed",
                    "change": "more likely"
                },
                {
                    "type": "event",
                    "event": "The jar has a clear surface.",
                    "change": "more likely"
                }
            ],
            [
                {
                    "type": "step",
                    "step": "Drain the sink."
                },
                {
                    "type": "entity",
                    "entity": "sink",
                    "attribute": "filled with water",
                    "change": "less likely"
                },
                {
                    "type": "event",
                    "event": "I wash my hands using the sink.",
                    "change": "more likely"
                }
            ]
        ]
    },
    "263": {
        "goal": "Use Sunscreen With Makeup",
        "annotator": "nguyen vo",
        "steps": [
            [
                {
                    "step": "Start"
                }
            ],
            [
                {
                    "type": "step",
                    "step": "Choose a sunscreen with an SPF of 15 or above"
                },
                {
                    "type": "predicted_event",
                    "event": "I get sunburnt.",
                    "change": "less likely"
                }
            ],
            [
                {
                    "type": "step",
                    "step": "Apply evenly to your entire face. "
                },
                {
                    "type": "entity",
                    "entity": "the sunscreen",
                    "attribute": "applied",
                    "change": "more likely"
                },
                {
                    "type": "event",
                    "event": "I get sunburnt.",
                    "change": "less likely"
                }
            ],
            [
                {
                    "type": "step",
                    "step": "Apply your makeup"
                }
            ]
        ]
    },
    "264": {
        "goal": "Melt Sugar",
        "annotator": "nguyen vo",
        "steps": [
            [
                {
                    "step": "Start"
                }
            ],
            [
                {
                    "type": "step",
                    "step": "Measure out the sugar"
                },
                {
                    "type": "entity",
                    "entity": "sugar",
                    "attribute": "visible",
                    "change": "more likely"
                },
                {
                    "type": "event",
                    "event": "I can see the white particles.",
                    "change": "more likely"
                }
            ],
            [
                {
                    "type": "step",
                    "step": "Place the sugar and cold water in a heavy-bottomed pot"
                }
            ],
            [
                {
                    "type": "step",
                    "step": "Place the pot on the stove over medium low heat"
                }
            ],
            [
                {
                    "type": "step",
                    "step": "Stir continuously until the sugar is dissolved"
                },
                {
                    "type": "entity",
                    "entity": "sugar",
                    "attribute": "visible",
                    "change": "less likely"
                },
                {
                    "type": "event",
                    "event": "I can see the white particles.",
                    "change": "less likely"
                },
                {
                    "type": "predicted_event",
                    "event": "I can see the white particles.",
                    "change": "less likely"
                }
            ]
        ]
    }
}
