# Supplementary material
Source: ML conference proceedings conference paper supplement (https://aclanthology.org/2023.findings-eacl.31)
Supplement: dataset [file 2023.findings-eacl.31.dataset.zip › causal_reasoning_of_entities_and_events/codex/v1.2.1/prompts/1hop_only.py]

class Wash_Hands:
  def __init__(self, event0, event1):
    self.event0 = event0 # I can safely touch a light switch.
    self.event1 = event1 # Water streaming sound can be heard.
  def turn_on_tap_water(self):
    self.event0.change = "equally likely" # I can safely touch a light switch.
    self.event1.change = "more likely" # Water streaming sound can be heard.
  def put_hands_under_running_water(self):
    self.event0.change = "less likely" # I can safely touch a light switch.
    self.event1.change = "equally likely" # Water streaming sound can be heard.
  def apply_soap_and_rub_hands(self):
    self.event0.change = "equally likely" # I can safely touch a light switch.
    self.event1.change = "equally likely" # Water streaming sound can be heard.
  def turn_off_tap_water(self):
    self.event0.change = "equally likely" # I can safely touch a light switch.
    self.event1.change = "less likely" # Water streaming sound can be heard.
  def dry_hands_with_towel(self):
    self.event0.change = "more likely" # I can safely touch a light switch.
    self.event1.change = "equally likely" # Water streaming sound can be heard.
    
class Change_Battery_of_TV_Remote_Control:
  def __init__(self, event0, event1):
    self.event0 = event0 # I can see inside the battery compartment
    self.event1 = event1 # The remote can turn on a TV.
  def pop_open_battery_cover(self):
    self.event0.change = "more likely" # I can see inside the battery compartment.
    self.event1.change = "equally likely" # The remote can turn on a TV.
  def take_out_old_batteries(self):
    self.event0.change = "equally likely" # I can see inside the battery compartment.
    self.event1.change = "less likely" # The remote can turn on a TV.
  def put_in_new_batteries(self):
    self.event0.change = "equally likely" # I can see inside the battery compartment.
    self.event1.change = "more likely" # The remote can turn on a TV.
  def close_battery_cover(self):
    self.event0.change = "less likely" # I can see inside the battery compartment.
    self.event1.change = "equally likely" # The remote can turn on a TV.

class Cook_Salmon_In_Oven:
  def __init__(self, event0, event1):
    self.event0 = event0 # The salmon can be easliy flaked by a fork.
    self.event1 = event1 # I touch the salmon and my fingers get wet.
  def pat_dry_salmon(self):
    self.event0.change = "equally likely" # The salmon can be easliy flaked by a fork.
    self.event1.change = "less likely" # I touch the salmon and my fingers get wet.
  def brush_salmon_with_sauce(self):
    self.event0.change = "equally likely" # The salmon can be easliy flaked by a fork.
    self.event1.change = "more likely" # I touch the salmon and my fingers get wet.
  def put_salmon_on_foil(self):
    self.event0.change = "equally likely" # The salmon can be easliy flaked by a fork.
    self.event1.change = "equally likely" # I touch the salmon and my fingers get wet.
  def put_salmon_in_oven_preheated_to_350_degrees_for_20_minutes(self):
    self.event0.change = "more likely" # The salmon can be easliy flaked by a fork.
    self.event1.change = "less likely" # I touch the salmon and my fingers get wet.
  def serve_salmon(self):
    self.event0.change = "equally likely" # The salmon can be easliy flaked by a fork.
    self.event1.change = "equally likely" # I touch the salmon and my fingers get wet.
