# Supplementary material
Source: ML conference proceedings conference paper supplement (https://aclanthology.org/2023.findings-eacl.31)
Supplement: dataset [file 2023.findings-eacl.31.dataset.zip › causal_reasoning_of_entities_and_events/codex/v1.2.3/README.md]

# Description
This is a variation of 1.2, where logical relations between an event and an entity is explicitly expressed.

Note: this setting is not discussed in the paper.
