# Supplementary material
Source: ML conference proceedings conference paper supplement (https://aclanthology.org/2023.findings-eacl.31)
Supplement: dataset [file 2023.findings-eacl.31.dataset.zip › causal_reasoning_of_entities_and_events/codex/v1.2.6/hainiu_v2/0hop_1hop_hainiu_ver2_4.py]

# python code

Goal = "Wash Hands"

Context = "I turn on the tap water. After this, the water is on."
Question = "What is the likelihood that I can safely touch a light switch comparing to the previous step?"
Options = ["more likely", "less likely", "equally likely"]
Answer = Options[2]

Context = "I put hands under running water. After this, the hands are wet."
Question = "What is the likelihood that I can safely touch a light switch comparing to the previous step?"
Options = ["more likely", "less likely", "equally likely"]
Answer = Options[1]

Context = "I apply soap and rub hands. "
Question = "What is the likelihood that I can safely touch a light switch comparing to the previous step?"
Options = ["more likely", "less likely", "equally likely"]
Answer = Options[2]

Context = "I turn off the tap water. After this, the water is not on."
Question = "What is the likelihood that I can safely touch a light switch comparing to the previous step?"
Options = ["more likely", "less likely", "equally likely"]
Answer = Options[2]

Context = "I dry my hands using a towel. After this, the hands are not wet."
Question = "What is the likelihood that I can safely touch a light switch comparing to the previous step?"
Options = ["more likely", "less likely", "equally likely"]
Answer = Options[0]


Goal = "Change Battery of TV Remote Control"

Context = "I pop open the battery cover. After this, the battery cover is removed."
Question = "What is the likelihood that I can see inside the battery compartment comparing to the previous step?"
Options = ["more likely", "less likely", "equally likely"]
Answer = Options[0]

Context = "I take out the old batteries. After this, the remote does not have battery."
Question = "What is the likelihood that I can see inside the battery compartment comparing to the previous step?"
Options = ["more likely", "less likely", "equally likely"]
Answer = Options[2]

Context = "I put in the new batteries. After this, the remote has battery."
Question = "What is the likelihood that I can see inside the battery compartment comparing to the previous step?"
Options = ["more likely", "less likely", "equally likely"]
Answer = Options[2]

Context = "I close the battery cover. After this, the battery cover is not removed."
Question = "What is the likelihood that I can see inside the battery compartment comparing to the previous step?"
Options = ["more likely", "less likely", "equally likely"]
Answer = Options[1]
