# Supplementary material
Source: ML conference proceedings conference paper supplement (https://aclanthology.org/2023.findings-eacl.31)
Supplement: dataset [file 2023.findings-eacl.31.dataset.zip › causal_reasoning_of_entities_and_events/codex/v1.2.6/hainiu_v2_experiments.py]

# %%
import re
import sys
import json
import time
import openai
import pickle
import argparse
from tqdm import tqdm
from copy import deepcopy
from collections import defaultdict
from send_notification import notify_me

openai.api_key_path = '/Users/seacow/School/UPenn/Research/Procedural Reasoning/api_keys/shuyan_api_key.txt'


def text_to_code(s, capitalize=False, lower=False):
    def strip_det(s):
        return s.removeprefix('a ').removeprefix('the ').removeprefix('my ').replace(' a ', ' ').replace(' the ', ' ').replace(' my ', ' ')
    s = s.replace('.','').replace(',','').replace('?','')
    if capitalize:
        return '_'.join([x.capitalize() for x in strip_det(s).split()])
    if lower:
        return '_'.join([x.lower() for x in strip_det(s).split()])
    return '_'.join(strip_det(s).split())


def goal_to_code(goal):
    if goal[:6].lower() == 'how to':
        goal = goal[6:].strip()
    return '_'.join(goal.capitalize().split())


def parse_codex_prediction(gen_code):
    #print(gen_code)
    step_changes = []
    current_step_changes = []
    for line in gen_code.split('\n')[1:]:
        line = line.strip()
        if line.startswith('def '):
            step_changes.append(current_step_changes) 
            current_step_changes = []
        elif line.startswith('self.event'):
            if " -= " in line:
                change = "less"
            elif " += " in line:
                change = "more"
            current_step_changes.append((line[5:11], change))
        elif not line:
            break
    step_changes.append(current_step_changes) 
    #print(step_changes)
    return step_changes


def parse_codex_prediction_v2(prediction):
    """function to parse Codex result on prompt version 2

    Args:
        prediction (str): Codex generated string

    Returns:
        list: list containing the event index and state change
    """
    step_changes = []
    current_step_changes = []
    for line in prediction.split('\n')[1:]:
        line = line.strip()
        if line.startswith('def '):
            step_changes.append(current_step_changes) 
            current_step_changes = []
        elif ".likelihood" in line:
            change = line.split('=')[-1].replace("'", '').strip()
            if change != 'equal':
                current_step_changes.append((line[:6], change))
    step_changes.append(current_step_changes)
    step_changes = step_changes[1:]
    return step_changes


def parse_01hop_result(res):
    pred = [[] for _ in range(len(res[0]))]
    for i, lst in enumerate(res):
        cur_name = f"event{i}"
        for j, res in enumerate(lst):
            if '0' in res:
                pred[j].append((cur_name, 'more'))
            elif '1' in res:
                pred[j].append((cur_name, 'less'))
    return pred


def parse_01_ver2_0_result(all_pred_changes):
    all_res = []
    for pred_lst in all_pred_changes:
        cur_res = [[] for _ in range(len(pred_lst[0]))]
        for i in range(len(pred_lst[0])):
            for j, lst in enumerate(pred_lst):
                if lst[i] == '"unrelated"':
                    pass
                elif lst[i] == '"likely"':
                    cur_res[i].append(tuple((f"event{j}", "more")))
                else:
                    cur_res[i].append(tuple((f"event{j}", "less")))
        all_res.append(cur_res)
    return all_res


def codex_hainiu_01hop_ver3_1_sbs(goal, steps, entities, events, gold_entity_changes):
    prompt = open('/Users/seacow/School/UPenn/Research/Procedural Reasoning/v2/hainiu_v2/0hop_1hop_hainiu_ver2_0.py').read()

    options = '["more likely", "less likely", "equally likely"]'
    goal_entity_changes = []

    prompt += f'Goal = "{goal.capitalize()}"\n'

    for event in events:
        cur_prompt = deepcopy(prompt)
        cur_question = f"What is the likelihood that {event.lower().replace('.', '?')}"
        cur_entity_change = []
        
        cur_entity_states = {e: {} for e in entities}
        
        for i, (step, entity) in enumerate(zip(steps, gold_entity_changes)):
            cur_prompt += f'Context = "I {step.lower().strip()}'
            
            if entity:
                for e in entities:
                    for d in entity:
                        if d['entity'].strip() == e.strip():
                            cur_attr = d['attribute']
                            if d['change'] == 'more likely':
                                likelihood = 'is'
                            else:
                                likelihood = 'is not'

                            if cur_attr not in cur_entity_states[e].keys():
                                cur_entity_states[e][cur_attr] = likelihood
                            elif cur_entity_states[e][cur_attr] != likelihood:
                                cur_entity_states[e][cur_attr] = likelihood
                    
            for key, val in cur_entity_states.items():
                if not val:
                    cur_prompt += f''
                else:
                    cur_state = key
                    for attr, lik in val.items():
                        cur_state += f' {lik} {attr}'
                        cur_state += ' and'
                    cur_prompt += f' After this, {cur_state[:-4]}.'
            cur_prompt += '"\n'
            
            cur_prompt += f'Question = {cur_question}\nOptions = {options}\nAnswer = '

            ind = 1
            while ind:
                try:
                    prediction = codex(cur_prompt)
                    ind = 0
                    time.sleep(5)
                except openai.error.RateLimitError:
                    time.sleep(10)
                    pass 
            cur_entity_change.append(prediction)
            cur_prompt += f'{prediction}\n\n'
        goal_entity_changes.append(cur_entity_change)
    return goal_entity_changes

    
def codex_hainiu_01hop_ver3_4_sbs(goal, steps, entities, events, gold_entity_changes):
    prompt = open('/Users/seacow/School/UPenn/Research/Procedural Reasoning/v2/hainiu_v2/0hop_1hop_hainiu_ver2_0.py').read()

    options = '["more likely", "less likely", "equally likely"]'
    goal_entity_changes = []

    prompt += f'Goal = "{goal.capitalize()}"\n'

    for event in events:
        cur_prompt = deepcopy(prompt)
        cur_question = f"What is the likelihood that {event.lower().replace('.', '?')}"
        cur_entity_change = []
        
        for i, (step, entity) in enumerate(zip(steps, gold_entity_changes)):
            cur_prompt += f'Context = "I {step.lower().strip()}'
            
            if entity:
                cur_prompt += f' After this, '
                init = 1
                for e in entities:
                    for d in entity:
                        if d['entity'].strip() == e.strip():
                            cur_attr = d['attribute']
                            if d['change'] == 'more likely':
                                likelihood = 'is'
                            else:
                                likelihood = 'is not'
                        if init:
                            cur_prompt += f'{e} {likelihood} {cur_attr}'
                            init = 0
                        else:
                            cur_prompt += f' and {e} {likelihood} {cur_attr}'

                cur_prompt += '."\n'
            else:
                cur_prompt += '"\n'
            
            cur_prompt += f'Question = {cur_question}\nOptions = {options}\nAnswer = '

            ind = 1
            while ind:
                try:
                    prediction = codex(cur_prompt)
                    ind = 0
                    time.sleep(5)
                except openai.error.RateLimitError:
                    time.sleep(10)
                    pass 
            cur_entity_change.append(prediction)
            cur_prompt += f'{prediction}\n\n'
        goal_entity_changes.append(cur_entity_change)
    return goal_entity_changes


def codex_hainiu_01hop_ver3_2_sbs(goal, steps, entities, events, gold_entity_changes):
    prompt = open('/Users/seacow/School/UPenn/Research/Procedural Reasoning/v2/hainiu_v2/0hop_1hop_hainiu_ver2_3.py').read()

    options = '["more likely", "less likely", "equally likely"]'
    goal_entity_changes = []

    prompt += f'Goal = "{goal.capitalize()}"\n'

    for event in events:
        cur_prompt = deepcopy(prompt)
        cur_question = f"What is the likelihood that {event.lower().replace('.', '?')}"
        cur_entity_change = []
        
        for i, (step, entity) in enumerate(zip(steps, gold_entity_changes)):
            cur_prompt += f'Context = "I {step.lower().strip()}"\n'
            cur_prompt += f'Question = {cur_question}\nOptions = {options}\nAnswer = '

            ind = 1
            while ind:
                try:
                    prediction = codex(cur_prompt)
                    ind = 0
                    time.sleep(5)
                except openai.error.RateLimitError:
                    time.sleep(10)
                    pass 
            cur_entity_change.append(prediction)
            cur_prompt += f'{prediction}\n\n'
        goal_entity_changes.append(cur_entity_change)
    return goal_entity_changes


def codex_hainiu_01hop_ver3_0_sbs(goal, steps, entities, events, gold_entity_changes):
    prompt = open('/Users/seacow/School/UPenn/Research/Procedural Reasoning/v2/hainiu_v2/0hop_1hop_hainiu_ver2_2.py').read()
    goal_entity_changes = []

    prompt += f"class {goal_to_code(goal)}():\n"
    prompt += "\tdef __init__(self):\n"
    for entity in entities:
        prompt += f"\t\tself.{text_to_code(entity)} = None\n"
    prompt += "\t\tself.state = None\n\n"

    for event in events:
        cur_prompt = deepcopy(prompt)
        cur_comment = f"# likelihood that {event.strip().lower().replace('.', '')}"
        cur_entity_change = []
        
        cur_entity_states = {e: {} for e in entities}
        
        for i, (step, entity) in enumerate(zip(steps, gold_entity_changes)):
            cur_prompt += f'\tdef step_{i}(self):\n'
            cur_prompt += f'\t\tcontent = "I {step.lower().strip()}"\n'
            
            if entity:
                for e in entities:
                    for d in entity:
                        if d['entity'].strip() == e.strip():
                            cur_attr = d['attribute']
                            if d['change'] == 'more likely':
                                likelihood = 'is'
                            else:
                                likelihood = 'is not'

                            if cur_attr not in cur_entity_states[e].keys():
                                cur_entity_states[e][cur_attr] = likelihood
                            elif cur_entity_states[e][cur_attr] != likelihood:
                                cur_entity_states[e][cur_attr] = likelihood
                    
            for key, val in cur_entity_states.items():
                if not val:
                    cur_prompt += f'\t\tself.{text_to_code(key)} = None\n'
                else:
                    cur_state = key
                    for attr, lik in val.items():
                        cur_state += f' {lik} {attr}'
                        cur_state += ' and'
                    cur_prompt += f'\t\tself.{text_to_code(key)} = "{cur_state[:-4]}"\n'
            
            cur_prompt += f'\t\t{cur_comment}\n\t\tself.state.likelihood = '
            ind = 1
            while ind:
                try:
                    prediction = codex(cur_prompt)
                    ind = 0
                    time.sleep(5)
                except openai.error.RateLimitError:
                    time.sleep(10)
                    pass 
            cur_entity_change.append(prediction)
            cur_prompt += f'{prediction}\n\n'

        goal_entity_changes.append(cur_entity_change)
                            
    return goal_entity_changes

    
def codex_hainiu_01hop_ver3_3_sbs(goal, steps, entities, events, gold_entity_changes):
    prompt = open('/Users/seacow/School/UPenn/Research/Procedural Reasoning/v2/hainiu_v2/0hop_1hop_hainiu_ver2_4.py').read()

    options = '["more likely", "less likely", "equally likely"]'
    goal_entity_changes = []

    prompt += f'Goal = "{goal.capitalize()}"\n'

    for event in events:
        cur_prompt = deepcopy(prompt)
        cur_question = f"What is the likelihood that {event.lower().replace('.', '')} comparing to the previous step?"
        cur_entity_change = []
        
        cur_entity_states = {e: {} for e in entities}
        
        for i, (step, entity) in enumerate(zip(steps, gold_entity_changes)):
            cur_prompt += f'Context = "I {step.lower().strip()}'
            
            if entity:
                for e in entities:
                    for d in entity:
                        if d['entity'].strip() == e.strip():
                            cur_attr = d['attribute']
                            if d['change'] == 'more likely':
                                likelihood = 'is'
                            else:
                                likelihood = 'is not'

                            if cur_attr not in cur_entity_states[e].keys():
                                cur_entity_states[e][cur_attr] = likelihood
                            elif cur_entity_states[e][cur_attr] != likelihood:
                                cur_entity_states[e][cur_attr] = likelihood
                    
            for key, val in cur_entity_states.items():
                if not val:
                    cur_prompt += f''
                else:
                    cur_state = key
                    for attr, lik in val.items():
                        cur_state += f' {lik} {attr}'
                        cur_state += ' and'
                    cur_prompt += f' After this, {cur_state[:-4]}.'
            cur_prompt += '"\n'
            
            cur_prompt += f'Question = {cur_question}\nOptions = {options}\nAnswer = '

            ind = 1
            while ind:
                try:
                    prediction = codex(cur_prompt)
                    ind = 0
                    time.sleep(5)
                except openai.error.RateLimitError:
                    time.sleep(10)
                    pass 
            cur_entity_change.append(prediction)
            cur_prompt += f'{prediction}\n\n'
        goal_entity_changes.append(cur_entity_change)
    return goal_entity_changes

    
def codex(prompt):
    ret = openai.Completion.create(
        engine=f"code-davinci-002",
        prompt=prompt,
        temperature=0,  # 0.7
        max_tokens=1024,
        top_p=1,
        logprobs=5,
        frequency_penalty=0,
        presence_penalty=0,
        stop=['\n\n']
    )
    gen_code = ret["choices"][0]["text"]#.strip().split('\n')[0]

    #time.sleep(8)
    #if 'True' in gen_code:
    #    return 'True'
    #elif 'False' in gen_code:
    #    return 'False'
    #else:
    #    return 'UNK'
    return gen_code


# %%
parser = argparse.ArgumentParser()
parser.add_argument('--prompt', type=str, required=True)

def main():

    args = parser.parse_args()
    prompt = args.prompt    

    with open('/Users/seacow/School/UPenn/Research/Procedural Reasoning/v2/data_dev_v2.json') as f:
            jobj = json.load(f)

    all_gold_changes = []
    all_pred_changes = []

    for id,v in tqdm(jobj.items()):
        goal = v['goal']
        steps = []
        events = []
        entities = []
        gold_event_changes = []
        gold_entity_changes = []
        for w in v['steps'][1:]:
            current_event_changes = []
            current_entity_changes = []
            for u in w:
                if u["type"] == "multihop":
                    if u["event"] not in events:
                        events.append(u["event"])
                    event_index = events.index(u["event"])
                    current_event_changes.append((f"event{event_index}", u["change"].split()[0]))
                if u["type"] == "entity":
                    if text_to_code(u["entity"]) not in entities:
                        entities.append(text_to_code(u["entity"]))  
                    current_entity_changes.append(u)
                if u["type"] == "step":
                    steps.append(u["step"])
            gold_event_changes.append(current_event_changes)
            gold_entity_changes.append(current_entity_changes)
        all_gold_changes.append(gold_event_changes)
        pred_changes = eval(prompt)(goal, steps, entities, events, gold_entity_changes)
        all_pred_changes.append(pred_changes)
        
        #if len(gold_event_changes) > len(pred_changes):
        #    for _ in range(len(gold_event_changes) - len(pred_changes)):
        #        pred_changes.append([])

        #assert(len(gold_event_changes) == len(pred_changes))
        #all_gold_changes += gold_event_changes
        #all_pred_changes += pred_changes
    
    final_res = []
    for i, lst in enumerate(all_pred_changes):
        final_res.append(parse_01hop_result(lst))

    pred_all, pred_correct, gold_all, gold_correct = 0,0,0,0
    assert(len(all_gold_changes) == len(all_pred_changes))
    for gold_step_changes, pred_step_changes in zip(all_gold_changes, final_res):
        for gold_step_change in gold_step_changes:
            gold_all += 1
            if gold_step_change in pred_step_changes:
                gold_correct += 1
        for pred_step_change in pred_step_changes:
            pred_all += 1
            if pred_step_change in gold_step_changes:
                pred_correct += 1

    precision = pred_correct/pred_all
    recall = gold_correct/gold_all
    f1 = 2 * precision * recall / (precision + recall)
    print("Precision:", precision)
    print("Recall:", recall)
    print("F1:", f1)
    
    
if __name__ == '__main__':
    main()


# %%
@notify_me
def run_experiment():
    with open('/Users/seacow/School/UPenn/Research/Procedural Reasoning/v2/data_dev_v2.json') as f:
            jobj = json.load(f)

    all_gold_changes = []
    all_pred_changes = []

    for id,v in tqdm(jobj.items()):
        goal = v['goal']
        steps = []
        events = []
        entities = []
        gold_event_changes = []
        gold_entity_changes = []
        for w in v['steps'][1:]:
            current_event_changes = []
            current_entity_changes = []
            for u in w:
                if u["type"] == "multihop":
                    if u["event"] not in events:
                        events.append(u["event"])
                    event_index = events.index(u["event"])
                    current_event_changes.append((f"event{event_index}", u["change"].split()[0]))
                if u["type"] == "entity":
                    if u["entity"].strip() not in entities:
                        entities.append(u['entity'])
                    current_entity_changes.append(u)
                if u["type"] == "step":
                    steps.append(u["step"])
            gold_event_changes.append(current_event_changes)
            gold_entity_changes.append(current_entity_changes)

        pred = codex_hainiu_01hop_ver3_4_sbs(goal, steps, entities, events, gold_entity_changes)
        #pred = test(goal, steps, entities, events, gold_entity_changes)[0]
        all_pred_changes += parse_01hop_result(pred)
        all_gold_changes += (gold_event_changes)


    pred_all, pred_correct, gold_all, gold_correct = 0,0,0,0
    assert(len(all_gold_changes) == len(all_pred_changes))
    for gold_step_changes, pred_step_changes in zip(all_gold_changes, all_pred_changes):
        for gold_step_change in gold_step_changes:
            gold_all += 1
            if gold_step_change in pred_step_changes:
                gold_correct += 1
        for pred_step_change in pred_step_changes:
            pred_all += 1
            if pred_step_change in gold_step_changes:
                pred_correct += 1

    precision = pred_correct/pred_all
    recall = gold_correct/gold_all
    f1 = 2 * precision * recall / (precision + recall)
    print("Precision:", precision)
    print("Recall:", recall)
    print("F1:", f1)


# %%
run_experiment()


#
#    
#    
#    
#    
# %%
def decode_prompt2_5(goal_entity_changes):
    parsed_res = [[] for _ in range(len(steps))]

    for i, lst in enumerate(goal_entity_changes):
        prev_state = lst[0]
        for j in range(1, len(parsed_res)):
            if lst[j] != prev_state:
                if '0' in lst[j]:
                    parsed_res[j].append(tuple((f"event{i}", "more")))
                elif '1' in lst[j]:
                    parsed_res[j].append(tuple((f"event{i}", "less")))
                prev_state = lst[j]    
    return parsed_res
# %%
def test(goal, steps, entities, events, gold_entity_changes):
    prompt = open('/Users/seacow/School/UPenn/Research/Procedural Reasoning/v2/hainiu_v2/0hop_1hop_hainiu_ver2_5.py').read()

    options = '["likely", "unlikely", "irrelevant"]'
    goal_entity_changes = []
    pred_event_changes = []

    prompt += f'Goal = "{goal.capitalize()}"\n'

    for event in events:
        cur_question = f"What is the likelihood that {event.lower().replace('.', '?')}"
        cur_entity_change = []
        
        cur_entity_states = {e: {} for e in entities}
        
        for i, (step, entity) in enumerate(zip(steps, gold_entity_changes)):
            cur_prompt = deepcopy(prompt)
            cur_prompt += f'Context = "I {step.lower().strip()}'
            
            if entity:
                for e in entities:
                    for d in entity:
                        if d['entity'].strip() == e.strip():
                            cur_attr = d['attribute']
                            if d['change'] == 'more likely':
                                likelihood = 'is'
                            else:
                                likelihood = 'is not'

                            if cur_attr not in cur_entity_states[e].keys():
                                cur_entity_states[e][cur_attr] = likelihood
                            elif cur_entity_states[e][cur_attr] != likelihood:
                                cur_entity_states[e][cur_attr] = likelihood
                    
            for key, val in cur_entity_states.items():
                if not val:
                    cur_prompt += f''
                else:
                    cur_state = key
                    for attr, lik in val.items():
                        cur_state += f' {lik} {attr}'
                        cur_state += ' and'
                    cur_prompt += f' After this, {cur_state[:-4]}.'
            cur_prompt += '"\n'
            
            cur_prompt += f'Question = {cur_question}\nOptions = {options}\nAnswer = '

            ind = 1
            while ind:
                try:
                    prediction = codex(cur_prompt)
                    ind = 0
                    time.sleep(5)
                except openai.error.RateLimitError:
                    time.sleep(10)
                    pass 
            cur_entity_change.append(prediction)
        goal_entity_changes.append(cur_entity_change)
        pred_event_changes.append(decode_prompt2_5(goal_entity_changes))
    return pred_event_changes

# %%


        

# %%
