# Supplementary material
Source: ML conference proceedings conference paper supplement (https://aclanthology.org/2023.findings-eacl.31)
Supplement: dataset [file 2023.findings-eacl.31.dataset.zip › causal_reasoning_of_entities_and_events/codex/v1.2.6/README.md]

# Prompting Codex with unstructured language

To run this model, use

```
python openai_models.py --data_path [path to parsed OpenPI file] --key [path to openai api key]
```

`./openpi/0hop-pred-unique.json` is parsed OpenPI data on devlopment set

`./openpi/0hop-test-unique.json` is parsed OpenPI data on testing set
