# Supplementary material
Source: ML conference proceedings conference paper supplement (https://aclanthology.org/2023.findings-eacl.31)
Supplement: dataset [file 2023.findings-eacl.31.dataset.zip › causal_reasoning_of_entities_and_events/codex/v1.2/data_dev_out_entity_and_event_atonce.tsv]

Goal	Step	Event	Gold label	Gold entities	Pred label	Pred entities	error type	comment
F1 Scores: [0.90754877 0.41584158 0.67816092]
0: Equally Likely, 1: Less Likely, 2: More Likely
Apply a screen protector on a phone	Get a screen protector.	A phone screen fails to stick on the screen.	0	[]	0	[]
Apply a screen protector on a phone	Find a low-dust workspace.	A phone screen fails to stick on the screen.	0	[]	0	[]
Apply a screen protector on a phone	Wash your hands.	A phone screen fails to stick on the screen.	0	[]	0	[]
Apply a screen protector on a phone	Clean the screen.	A phone screen fails to stick on the screen.	1	[('the screen', 'dirty', 'less likely')]	0	[]	MISSING_ENTITY
Apply a screen protector on a phone	Check placement of the screen protector.	A phone screen fails to stick on the screen.	0	[]	0	[]
Apply a screen protector on a phone	Peel off the screen protector.	A phone screen fails to stick on the screen.	0	[]	0	[]
Apply a screen protector on a phone	Place the screen protector carefully on the phone screen so that the edges align.	A phone screen fails to stick on the screen.	0	[]	2	[('screen_protector', 'has', 'True')]	FALSE_CAUSATION
Apply a screen protector on a phone	Remove air bubbles.	A phone screen fails to stick on the screen.	0	[]	0	[]
Apply a screen protector on a phone	Get a screen protector.	My phone screen breaks if I drop my phone.	0	[]	0	[]
Apply a screen protector on a phone	Find a low-dust workspace.	My phone screen breaks if I drop my phone.	0	[]	0	[]
Apply a screen protector on a phone	Wash your hands.	My phone screen breaks if I drop my phone.	0	[]	0	[]
Apply a screen protector on a phone	Clean the screen.	My phone screen breaks if I drop my phone.	0	[]	0	[]
Apply a screen protector on a phone	Check placement of the screen protector.	My phone screen breaks if I drop my phone.	0	[]	0	[]
Apply a screen protector on a phone	Peel off the screen protector.	My phone screen breaks if I drop my phone.	0	[]	0	[]
Apply a screen protector on a phone	Place the screen protector carefully on the phone screen so that the edges align.	My phone screen breaks if I drop my phone.	1	[('the screen protector', 'on the phone', 'more likely')]	2	[]	MISSING_ENTITY
Apply a screen protector on a phone	Remove air bubbles.	My phone screen breaks if I drop my phone.	0	[]	0	[]
Apply for a UK visa	Find your local visa application center.	The visa officer receives your materials.	0	[]	0	[]
Apply for a UK visa	Make an appointment.	The visa officer receives your materials.	0	[]	0	[]
Apply for a UK visa	Prepare material.	The visa officer receives your materials.	0	[]	0	[]
Apply for a UK visa	Go to your application appointment.	The visa officer receives your materials.	2	[('material', 'at the application center', 'more likely')]	2	[]
Apply for a UK visa	Go home and receive your visa by mail.	The visa officer receives your materials.	0	[]	0	[]
Apply for a UK visa	Find your local visa application center.	You hear a knock on your door.	0	[]	0	[]
Apply for a UK visa	Make an appointment.	You hear a knock on your door.	0	[]	0	[]
Apply for a UK visa	Prepare material.	You hear a knock on your door.	0	[]	0	[]
Apply for a UK visa	Go to your application appointment.	You hear a knock on your door.	1	[('you', 'at the application center', 'more likely')]	0	[]	MISSING_ENTITY
Apply for a UK visa	Go home and receive your visa by mail.	You hear a knock on your door.	2	[('you', 'at the application center', 'less likely')]	2	[('visa', 'received', 'True')]	FALSE_CAUSATION
Apply for a UK visa	Find your local visa application center.	You travel to UK.	0	[]	0	[]
Apply for a UK visa	Make an appointment.	You travel to UK.	0	[]	0	[]
Apply for a UK visa	Prepare material.	You travel to UK.	0	[]	0	[]
Apply for a UK visa	Go to your application appointment.	You travel to UK.	0	[]	0	[]
Apply for a UK visa	Go home and receive your visa by mail.	You travel to UK.	2	[('you', 'have a UK visa', 'more likely')]	2	[]
Arrange Flowers in a Vase	Choose the right vase.	The flowers are wet.	0	[]	0	[]
Arrange Flowers in a Vase	Use a clear elastic hair tie to gather flowers together.	The flowers are wet.	0	[]	0	[]
Arrange Flowers in a Vase	Pour fresh, cool water in your vase.	The flowers are wet.	0	[]	2	[('vase', 'has_water', 'True')]	FALSE_CAUSATION
Arrange Flowers in a Vase	Add a couple of drops of bleach to the water.	The flowers are wet.	0	[]	0	[]
Arrange Flowers in a Vase	Organize your flowers and trim off leaves.	The flowers are wet.	0	[]	0	[]
Arrange Flowers in a Vase	Cut the flower stems with a sharp knife or garden clippers.	The flowers are wet.	0	[]	0	[]
Arrange Flowers in a Vase	Insert the flowers into the vase	The flowers are wet.	2	[('the flowers', 'in the vase', 'more likely')]	0	[]	MISSING_ENTITY
Arrange Flowers in a Vase	Choose the right vase.	The flowers fall apart.	0	[]	0	[]	MISSING_ENTITY
Arrange Flowers in a Vase	Use a clear elastic hair tie to gather flowers together.	The flowers fall apart.	1	[]	0	[]
Arrange Flowers in a Vase	Pour fresh, cool water in your vase.	The flowers fall apart.	0	[]	0	[]
Arrange Flowers in a Vase	Add a couple of drops of bleach to the water.	The flowers fall apart.	0	[]	0	[]
Arrange Flowers in a Vase	Organize your flowers and trim off leaves.	The flowers fall apart.	0	[]	0	[]
Arrange Flowers in a Vase	Cut the flower stems with a sharp knife or garden clippers.	The flowers fall apart.	0	[]	0	[]
Arrange Flowers in a Vase	Insert the flowers into the vase	The flowers fall apart.	0	[]	1	[('flowers', 'in_vase', 'True')]	FALSE_CAUSATION
Bath your dog	Get the water temperature right.	Bubbles can be seen on the dog.	0	[]	0	[]
Bath your dog	Wet your dog's body with water.	Bubbles can be seen on the dog.	0	[]	0	[]
Bath your dog	Apply the shampoo.	Bubbles can be seen on the dog.	2	[('the shampoo', "on the dog's body", 'more likely')]	2	[]
Bath your dog	Rinse your dog until the water from his fur runs clear.	Bubbles can be seen on the dog.	1	[('the shampoo', "on the dog's body", 'less likely')]	1	[]
Bath your dog	Dry your dog.	Bubbles can be seen on the dog.	0	[]	0	[]
Bath your dog	Give your dog a treat.	Bubbles can be seen on the dog.	0	[]	0	[]
Bath your dog	Get the water temperature right.	I hug the dog and water on my clothes.	0	[]	0	[]
Bath your dog	Wet your dog's body with water.	I hug the dog and water on my clothes.	2	[]	2	[('dog', 'wet', 'True')]
Bath your dog	Apply the shampoo.	I hug the dog and water on my clothes.	0	[]	2	[('dog', 'wet', 'True')]	NO_FURTHER_CHANGE
Bath your dog	Rinse your dog until the water from his fur runs clear.	I hug the dog and water on my clothes.	0	[]	2	[('dog', 'wet', 'True')]	NO_FURTHER_CHANGE
Bath your dog	Dry your dog.	I hug the dog and water on my clothes.	2	[]	1	[('dog', 'wet', 'False')]	WRONG_GOLD
Bath your dog	Give your dog a treat.	I hug the dog and water on my clothes.	0	[]	0	[]
Bath your dog	Get the water temperature right.	I walk the dog.	0	[]	0	[]
Bath your dog	Wet your dog's body with water.	I walk the dog.	1	[('the dog', 'wet', 'more likely')]	0	[]	MISSING_ENTITY
Bath your dog	Apply the shampoo.	I walk the dog.	0	[]	0	[]
Bath your dog	Rinse your dog until the water from his fur runs clear.	I walk the dog.	0	[]	0	[]
Bath your dog	Dry your dog.	I walk the dog.	2	[('the dog', 'wet', 'less likely')]	0	[]	MISSING_ENTITY
Bath your dog	Give your dog a treat.	I walk the dog.	2	[('the dog', 'happy', 'more likely')]	0	[]	MISSING_ENTITY
Clean and sanitize a cutting board	Scrub the board with warm water.	I cut food on the board.	1	[('the board', 'wet', 'more likely')]	0	[]
Clean and sanitize a cutting board	Let the board air-dry for several hours.	I cut food on the board.	2	[('the board', 'wet', 'less likely')]	0	[]
Clean and sanitize a cutting board	Sanitize and deodorize your cutting board with vinegar or a commercial, food-safe sanitizer.	I cut food on the board.	1	[('chemical materials', 'on the board', 'more likely'), ('the board', 'wet', 'more likely')]	0	[]
Clean and sanitize a cutting board	Let the board air-dry before placing it back in storage.	I cut food on the board.	2	[('chemical materials', 'on the board', 'less likely'), ('the board', 'wet', 'less likely')]	0	[]
Clean baked on grease off glass dishes	Fill the bottom of the dish with warm water.	Dropping the glassware makes the floor wet.	2	[('the glassware', 'wet', 'more likely')]	2	[('water', 'in_dish', 'True')]
Clean baked on grease off glass dishes	Pour a pea-sized amount of dish soap into the water.	Dropping the glassware makes the floor wet.	0	[]	0	[]
Clean baked on grease off glass dishes	Place 1 dryer sheet into the glass dish.	Dropping the glassware makes the floor wet.	0	[]	0	[]
Clean baked on grease off glass dishes	Leave the sheet in the glassware for at least 10 minutes.	Dropping the glassware makes the floor wet.	0	[]	0	[]
Clean baked on grease off glass dishes	Wipe off the baked on grease with a sponge and dry.	Dropping the glassware makes the floor wet.	1	[('the glassware', 'wet', 'less likely')]	1	[('glassware', 'clean', 'True')]
Clean baked on grease off glass dishes	Fill the bottom of the dish with warm water.	The glassware looks like new.	0	[]	0	[]
Clean baked on grease off glass dishes	Pour a pea-sized amount of dish soap into the water.	The glassware looks like new.	0	[]	0	[]
Clean baked on grease off glass dishes	Place 1 dryer sheet into the glass dish.	The glassware looks like new.	0	[]	0	[]
Clean baked on grease off glass dishes	Leave the sheet in the glassware for at least 10 minutes.	The glassware looks like new.	0	[]	2	[('glassware', 'clean', 'True')]	SUBJECTIVITY
Clean baked on grease off glass dishes	Wipe off the baked on grease with a sponge and dry.	The glassware looks like new.	2	[('the glassware', 'clean', 'more likely')]	0	[]	SUBJECTIVITY
Clean toilet bowl	Flush toilet.	I use the toilet.	0	[]	0	[]
Clean toilet bowl	Pour 1/3 cup of bleach into the bowl.	I use the toilet.	0	[]	0	[]
Clean toilet bowl	Scrub the bowl with a toilet brush, making sure to get under the rim.	I use the toilet.	0	[]	0	[]
Clean toilet bowl	Wait 6 minutes for disinfecting. Don't allow pets or children near the toilet.	I use the toilet.	0	[]	0	[]
Clean toilet bowl	Flush the toilet again.	I use the toilet.	2	[('the bleach', 'in the bowl', 'less likely')]	0	[]
Clean toilet bowl	Flush toilet.	Someone uses the toilet.	0	[]	0	[]
Clean toilet bowl	Pour 1/3 cup of bleach into the bowl.	Someone uses the toilet.	1	[('the bleach', 'in the bowl', 'more likely')]	0	[]
Clean toilet bowl	Scrub the bowl with a toilet brush, making sure to get under the rim.	Someone uses the toilet.	0	[]	0	[]
Clean toilet bowl	Wait 6 minutes for disinfecting. Don't allow pets or children near the toilet.	Someone uses the toilet.	0	[]	0	[]
Clean toilet bowl	Flush the toilet again.	Someone uses the toilet.	0	[]	0	[]
Dispose of Dog Poop	Pick up dog poop.	I touch my face.	1	[('my hand', 'dirty', 'more likely')]	1	[('poop', 'picked_up', 'True')]
Dispose of Dog Poop	Place the dog poop in a plastic bag.	I touch my face.	0	[]	0	[]
Dispose of Dog Poop	Tie up the bag neatly.	I touch my face.	0	[]	0	[]
Dispose of Dog Poop	Put the bag in the trash can.	I touch my face.	0	[]	0	[]
Dispose of Dog Poop	Wash your hands thoroughly.	I touch my face.	2	[('my hand', 'dirty', 'less likely')]	2	[]
Do laundry with a washing machine	Open the door of the washing machine.	I push to open the door of the washing machine.	0	[]	2	[('washing_machine', 'door_open', 'True')]	WRONG_GOLD
Do laundry with a washing machine	Put the laundry inside the washing machine.	I push to open the door of the washing machine.	0	[]	0	[]
Do laundry with a washing machine	Close the door.	I push to open the door of the washing machine.	0	[]	1	[('washing_machine', 'door_open', 'False')]	WRONG_GOLD
Do laundry with a washing machine	Add detergents to the detergent compartment.	I push to open the door of the washing machine.	0	[]	0	[]
Do laundry with a washing machine	Choose a cycle.	I push to open the door of the washing machine.	0	[]	0	[]
Do laundry with a washing machine	Press start and wait for the cycle to finish.	I push to open the door of the washing machine.	1	[]	0	[]	MISSING_ENTITY
Do laundry with a washing machine	When the cycle ends, move the clothes to the dryer.	I push to open the door of the washing machine.	2	[('the clothes', 'clean', 'more likely'), ('the washing machine door', 'locked', 'less likely')]	0	[]	MISSING_ENTITY
Do laundry with a washing machine	Open the door of the washing machine.	I wear the clothes and stay dry.	0	[]	0	[]
Do laundry with a washing machine	Put the laundry inside the washing machine.	I wear the clothes and stay dry.	0	[]	0	[]
Do laundry with a washing machine	Close the door.	I wear the clothes and stay dry.	0	[]	0	[]
Do laundry with a washing machine	Add detergents to the detergent compartment.	I wear the clothes and stay dry.	0	[]	0	[]
Do laundry with a washing machine	Choose a cycle.	I wear the clothes and stay dry.	0	[]	0	[]
Do laundry with a washing machine	Press start and wait for the cycle to finish.	I wear the clothes and stay dry.	1	[('the washing machine door', 'locked', 'more likely'), ('the clothes', 'wet', 'more likely')]	0	[]	SUBJECTIVITY
Do laundry with a washing machine	When the cycle ends, move the clothes to the dryer.	I wear the clothes and stay dry.	0	[]	0	[]
Draw an music animation	Decide on a background music.	The actual drawing has finished.	0	[]	0	[]
Draw an music animation	Write down an outline of what to draw for each line of lyrics.	The actual drawing has finished.	0	[]	0	[]
Draw an music animation	Draw the key frames for each scene.	The actual drawing has finished.	0	[]	0	[]
Draw an music animation	Draw the in-betweens and everything else.	The actual drawing has finished.	2	[('in-betweens', 'drawn', 'more likely')]	2	[('drawing', 'in_betweens', 'True')]
Draw an music animation	Open a video editor like DaVinci Resolve or iMovie.	The actual drawing has finished.	0	[]	0	[]
Draw an music animation	Import the music and the drawings.	The actual drawing has finished.	0	[]	0	[]
Draw an music animation	Put the music on the timeline.	The actual drawing has finished.	0	[]	0	[]
Draw an music animation	Put the drawings on the timeline.	The actual drawing has finished.	0	[]	0	[]
Draw an music animation	Line up drawings with the music.	The actual drawing has finished.	0	[]	0	[]
Draw an music animation	Export the video.	The actual drawing has finished.	0	[]	0	[]
Draw an music animation	Decide on a background music.	The actual drawing has started.	0	[]	0	[]
Draw an music animation	Write down an outline of what to draw for each line of lyrics.	The actual drawing has started.	0	[]	0	[]
Draw an music animation	Draw the key frames for each scene.	The actual drawing has started.	2	[('key frames', 'drawn', 'more likely')]	2	[('drawing', 'key_frames', 'True')]
Draw an music animation	Draw the in-betweens and everything else.	The actual drawing has started.	0	[]	0	[]
Draw an music animation	Open a video editor like DaVinci Resolve or iMovie.	The actual drawing has started.	0	[]	0	[]
Draw an music animation	Import the music and the drawings.	The actual drawing has started.	0	[]	0	[]
Draw an music animation	Put the music on the timeline.	The actual drawing has started.	0	[]	0	[]
Draw an music animation	Put the drawings on the timeline.	The actual drawing has started.	0	[]	0	[]
Draw an music animation	Line up drawings with the music.	The actual drawing has started.	0	[]	0	[]
Draw an music animation	Export the video.	The actual drawing has started.	0	[]	0	[]
Draw an music animation	Decide on a background music.	The audio and video plays in sync.	0	[]	0	[]
Draw an music animation	Write down an outline of what to draw for each line of lyrics.	The audio and video plays in sync.	0	[]	0	[]
Draw an music animation	Draw the key frames for each scene.	The audio and video plays in sync.	0	[]	0	[]
Draw an music animation	Draw the in-betweens and everything else.	The audio and video plays in sync.	0	[]	0	[]
Draw an music animation	Open a video editor like DaVinci Resolve or iMovie.	The audio and video plays in sync.	0	[]	0	[]
Draw an music animation	Import the music and the drawings.	The audio and video plays in sync.	0	[]	0	[]
Draw an music animation	Put the music on the timeline.	The audio and video plays in sync.	0	[]	0	[]
Draw an music animation	Put the drawings on the timeline.	The audio and video plays in sync.	0	[]	0	[]
Draw an music animation	Line up drawings with the music.	The audio and video plays in sync.	2	[('the drawings and music', 'lined up', 'more likely')]	2	[('video', 'lined_up', 'True')]
Draw an music animation	Export the video.	The audio and video plays in sync.	0	[]	0	[]
Draw an music animation	Decide on a background music.	The required audio and video files are on the computer.	0	[]	0	[]
Draw an music animation	Write down an outline of what to draw for each line of lyrics.	The required audio and video files are on the computer.	0	[]	0	[]
Draw an music animation	Draw the key frames for each scene.	The required audio and video files are on the computer.	0	[]	0	[]
Draw an music animation	Draw the in-betweens and everything else.	The required audio and video files are on the computer.	0	[]	0	[]
Draw an music animation	Open a video editor like DaVinci Resolve or iMovie.	The required audio and video files are on the computer.	0	[]	0	[]
Draw an music animation	Import the music and the drawings.	The required audio and video files are on the computer.	2	[('the music', 'imported', 'more likely'), ('the drawings', 'imported', 'more likely')]	2	[('video', 'imported', 'True')]
Draw an music animation	Put the music on the timeline.	The required audio and video files are on the computer.	0	[]	0	[]
Draw an music animation	Put the drawings on the timeline.	The required audio and video files are on the computer.	0	[]	0	[]
Draw an music animation	Line up drawings with the music.	The required audio and video files are on the computer.	0	[]	0	[]
Draw an music animation	Export the video.	The required audio and video files are on the computer.	0	[]	0	[]
Eat at a restaurant in the US	Arrive at the resturant.	I eat.	0	[]	0	[]
Eat at a restaurant in the US	Let the host know the size of your party and follow them to the table.	I eat.	0	[]	0	[]
Eat at a restaurant in the US	Order food and drinks.	I eat.	0	[]	0	[]
Eat at a restaurant in the US	Enjoy the food brought to the table.	I eat.	2	[('food', 'on the table', 'more likely')]	2	[('drink', 'drunk', 'True'), ('food', 'eaten', 'True')]
Eat at a restaurant in the US	Ask for the check when you're finished.	I eat.	1	[]	0	[]
Eat at a restaurant in the US	Have the waiter clear off the table.	I eat.	1	[('food', 'on the table', 'less likely')]	0	[]	MISSING_ENTITY
Eat at a restaurant in the US	Pay by cash or credit card.	I eat.	0	[]	0	[]
Eat at a restaurant in the US	Leave the restaurant.	I eat.	0	[]	0	[]
Eat at a restaurant in the US	Arrive at the resturant.	I go home.	0	[]	0	[]
Eat at a restaurant in the US	Let the host know the size of your party and follow them to the table.	I go home.	0	[]	0	[]
Eat at a restaurant in the US	Order food and drinks.	I go home.	1	[('order', 'placed', 'more likely')]	0	[]	MISSING_ENTITY
Eat at a restaurant in the US	Enjoy the food brought to the table.	I go home.	0	[]	0	[]
Eat at a restaurant in the US	Ask for the check when you're finished.	I go home.	0	[]	0	[]
Eat at a restaurant in the US	Have the waiter clear off the table.	I go home.	0	[]	0	[]
Eat at a restaurant in the US	Pay by cash or credit card.	I go home.	2	[('the check', 'paid', 'more likely')]	0	[]	MISSING_ENTITY
Eat at a restaurant in the US	Leave the restaurant.	I go home.	0	[]	2	[]
Fly a Dual Line Kite	Assemble the kite inside.	I let go of the kite.	0	[]	0	[]
Fly a Dual Line Kite	Stand with your back toward the wind.	I let go of the kite.	0	[]	0	[]
Fly a Dual Line Kite	Walk backward.	I let go of the kite.	0	[]	0	[]
Fly a Dual Line Kite	Pull gently on the lines.	I let go of the kite.	1	[('the kite', 'in the sky', 'more likely')]	1	[('kite', 'flying', 'True')]
Fly a Dual Line Kite	Land your kite.	I let go of the kite.	2	[('the kite', 'in the sky', 'less likely')]	2	[('kite', 'flying', 'False')]
Fold a shirt	Lay the shirt face down on a flat surface.	The shirt takes up less space in my wardrobe.	0	[]	0	[]
Fold a shirt	Smooth the fabric out to remove any wrinkles on it.	The shirt takes up less space in my wardrobe.	0	[]	0	[]
Fold a shirt	Fold the shirt sideways into thirds to bring the sleeves in.	The shirt takes up less space in my wardrobe.	2	[('shirt', 'reduced in size', 'more likely')]	0	[]
Fold a shirt	Fold the sleeves back in if they don't lay neatly over the fabric.	The shirt takes up less space in my wardrobe.	2	[('shirt', 'reduced in size', 'more likely')]	0	[]
Fold a shirt	Fold the shirt in half from the bottom up.	The shirt takes up less space in my wardrobe.	2	[('shirt', 'reduced in size', 'more likely')]	0	[]
Fold a shirt	Repeat folding the shirt in half to reduce its size.	The shirt takes up less space in my wardrobe.	2	[('shirt', 'reduced in size', 'more likely')]	2	[]
Frame a Puzzle	Find a frame that fits your puzzle.	I can see the back of the puzzle.	0	[]	0	[]
Frame a Puzzle	Cut a backing material to fit the frame.	I can see the back of the puzzle.	0	[]	0	[]
Frame a Puzzle	Slide a layer of wax paper under the puzzle.	I can see the back of the puzzle.	0	[]	0	[]
Frame a Puzzle	Use a rolling pin to flatten the puzzle.	I can see the back of the puzzle.	0	[]	0	[]
Frame a Puzzle	Brush puzzle glue over the surface of the puzzle.	I can see the back of the puzzle.	0	[]	0	[]
Frame a Puzzle	Wait for the glue to dry.	I can see the back of the puzzle.	0	[]	0	[]
Frame a Puzzle	Glue the puzzle to the backing material.	I can see the back of the puzzle.	1	[('back of the puzzle', 'adhering to material', 'more likely')]	0	[]
Frame a Puzzle	Let the puzzle dry for at least 24 hours, weighing it down if necessary.	I can see the back of the puzzle.	0	[]	0	[]
Frame a Puzzle	Frame the puzzle.	I can see the back of the puzzle.	0	[]	0	[]
Frame a Puzzle	Find a frame that fits your puzzle.	My hands get sticky after I touch the puzzle.	0	[]	0	[]
Frame a Puzzle	Cut a backing material to fit the frame.	My hands get sticky after I touch the puzzle.	0	[]	0	[]
Frame a Puzzle	Slide a layer of wax paper under the puzzle.	My hands get sticky after I touch the puzzle.	0	[]	0	[]
Frame a Puzzle	Use a rolling pin to flatten the puzzle.	My hands get sticky after I touch the puzzle.	0	[]	0	[]
Frame a Puzzle	Brush puzzle glue over the surface of the puzzle.	My hands get sticky after I touch the puzzle.	2	[('front of the puzzle', 'sticky', 'more likely')]	2	[('puzzle', 'glued', 'True')]
Frame a Puzzle	Wait for the glue to dry.	My hands get sticky after I touch the puzzle.	1	[('front of the puzzle', 'sticky', 'less likely')]	0	[]
Frame a Puzzle	Glue the puzzle to the backing material.	My hands get sticky after I touch the puzzle.	0	[]	0	[]
Frame a Puzzle	Let the puzzle dry for at least 24 hours, weighing it down if necessary.	My hands get sticky after I touch the puzzle.	0	[]	1	[('puzzle', 'glued', 'False')]
Frame a Puzzle	Frame the puzzle.	My hands get sticky after I touch the puzzle.	0	[]	0	[]
Frame a Puzzle	Find a frame that fits your puzzle.	The puzzle is taken apart.	0	[]	0	[]
Frame a Puzzle	Cut a backing material to fit the frame.	The puzzle is taken apart.	0	[]	0	[]
Frame a Puzzle	Slide a layer of wax paper under the puzzle.	The puzzle is taken apart.	0	[]	0	[]
Frame a Puzzle	Use a rolling pin to flatten the puzzle.	The puzzle is taken apart.	0	[]	0	[]
Frame a Puzzle	Brush puzzle glue over the surface of the puzzle.	The puzzle is taken apart.	0	[]	0	[]
Frame a Puzzle	Wait for the glue to dry.	The puzzle is taken apart.	1	[]	0	[]
Frame a Puzzle	Glue the puzzle to the backing material.	The puzzle is taken apart.	0	[]	0	[]
Frame a Puzzle	Let the puzzle dry for at least 24 hours, weighing it down if necessary.	The puzzle is taken apart.	0	[]	0	[]
Frame a Puzzle	Frame the puzzle.	The puzzle is taken apart.	0	[]	0	[]
Go to see a musical	Compare different websites to find the cheapest ticket.	I have paid for the musical.	0	[]	0	[]
Go to see a musical	Buy the ticket online.	I have paid for the musical.	2	[('your ticket', 'secured', 'more likely')]	2	[('ticket', 'bought', 'True')]
Go to see a musical	Go to the musical theater.	I have paid for the musical.	0	[]	0	[]
Go to see a musical	Find your seat.	I have paid for the musical.	0	[]	0	[]
Go to see a musical	Watch the musical.	I have paid for the musical.	0	[]	0	[]
Go to see a musical	Leave the theater.	I have paid for the musical.	0	[]	0	[]
Go to see a musical	Compare different websites to find the cheapest ticket.	I make a phone call.	0	[]	0	[]
Go to see a musical	Buy the ticket online.	I make a phone call.	0	[]	0	[]
Go to see a musical	Go to the musical theater.	I make a phone call.	0	[]	0	[]
Go to see a musical	Find your seat.	I make a phone call.	0	[]	0	[]
Go to see a musical	Watch the musical.	I make a phone call.	1	[('the musical', 'playing', 'more likely')]	0	[]
Go to see a musical	Leave the theater.	I make a phone call.	2	[('the musical', 'playing', 'less likely')]	0	[]
Go to see a musical	Compare different websites to find the cheapest ticket.	You can see other audience around you.	0	[]	0	[]
Go to see a musical	Buy the ticket online.	You can see other audience around you.	0	[]	0	[]
Go to see a musical	Go to the musical theater.	You can see other audience around you.	2	[('you', 'in the theater', 'more likely')]	0	[]
Go to see a musical	Find your seat.	You can see other audience around you.	0	[]	2	[('theater', 'seated', 'True')]
Go to see a musical	Watch the musical.	You can see other audience around you.	0	[]	0	[]
Go to see a musical	Leave the theater.	You can see other audience around you.	1	[('you', 'in the theater', 'less likely')]	0	[]
Go to see a musical	Compare different websites to find the cheapest ticket.	You walk around.	0	[]	0	[]
Go to see a musical	Buy the ticket online.	You walk around.	0	[]	0	[]
Go to see a musical	Go to the musical theater.	You walk around.	0	[]	0	[]
Go to see a musical	Find your seat.	You walk around.	1	[('you', 'standing', 'less likely')]	1	[]
Go to see a musical	Watch the musical.	You walk around.	0	[]	0	[]
Go to see a musical	Leave the theater.	You walk around.	1	[('you', 'standing', 'more likely')]	0	[]
Grind coffee beans	Prepare a sealed jar	I can use the beans to make expresso.	0	[]	0	[]
Grind coffee beans	Open the lid of the jar	I can use the beans to make expresso.	0	[]	0	[]
Grind coffee beans	Open the coffee bean bag	I can use the beans to make expresso.	0	[]	0	[]
Grind coffee beans	Open the lid of the grinder.	I can use the beans to make expresso.	0	[]	0	[]
Grind coffee beans	Pour some coffee beans to the grinder	I can use the beans to make expresso.	0	[]	0	[]
Grind coffee beans	Plug in the grinder	I can use the beans to make expresso.	0	[]	0	[]
Grind coffee beans	Set the grinding options	I can use the beans to make expresso.	0	[]	0	[]
Grind coffee beans	Press the button	I can use the beans to make expresso.	0	[]	0	[]
Grind coffee beans	Wait until the grinder stops automatically	I can use the beans to make expresso.	0	[]	2	[]
Grind coffee beans	Open the lid of the grinder	I can use the beans to make expresso.	2	[]	0	[]
Grind coffee beans	Pour all the grounded coffee into the jar	I can use the beans to make expresso.	0	[]	0	[]
Grind coffee beans	Seal the jar	I can use the beans to make expresso.	0	[]	0	[]
Grind coffee beans	Unplug the grinder.	I can use the beans to make expresso.	0	[]	0	[]
Grind coffee beans	Seal the coffee bean bag.	I can use the beans to make expresso.	0	[]	0	[]
Grind coffee beans	Prepare a sealed jar	I remove all contents from the coffee bean bag.	0	[]	0	[]
Grind coffee beans	Open the lid of the jar	I remove all contents from the coffee bean bag.	0	[]	0	[]
Grind coffee beans	Open the coffee bean bag	I remove all contents from the coffee bean bag.	2	[('the coffee bean bag', 'open', 'more likely')]	2	[('coffee_bean_bag', 'sealed', 'False')]
Grind coffee beans	Open the lid of the grinder.	I remove all contents from the coffee bean bag.	0	[]	0	[]
Grind coffee beans	Pour some coffee beans to the grinder	I remove all contents from the coffee bean bag.	0	[]	0	[]
Grind coffee beans	Plug in the grinder	I remove all contents from the coffee bean bag.	0	[]	0	[]
Grind coffee beans	Set the grinding options	I remove all contents from the coffee bean bag.	0	[]	0	[]
Grind coffee beans	Press the button	I remove all contents from the coffee bean bag.	0	[]	0	[]
Grind coffee beans	Wait until the grinder stops automatically	I remove all contents from the coffee bean bag.	0	[]	0	[]
Grind coffee beans	Open the lid of the grinder	I remove all contents from the coffee bean bag.	0	[]	0	[]
Grind coffee beans	Pour all the grounded coffee into the jar	I remove all contents from the coffee bean bag.	0	[]	0	[]
Grind coffee beans	Seal the jar	I remove all contents from the coffee bean bag.	0	[]	0	[]
Grind coffee beans	Unplug the grinder.	I remove all contents from the coffee bean bag.	0	[]	0	[]
Grind coffee beans	Seal the coffee bean bag.	I remove all contents from the coffee bean bag.	1	[('the coffee bean bag', 'open', 'less likely')]	1	[('coffee_bean_bag', 'sealed', 'True')]
Grind coffee beans	Prepare a sealed jar	I remove all contents from the jar.	0	[]	1	[('jar', 'sealed', 'True')]
Grind coffee beans	Open the lid of the jar	I remove all contents from the jar.	2	[('the jar', 'open', 'more likely')]	2	[('jar', 'sealed', 'False')]
Grind coffee beans	Open the coffee bean bag	I remove all contents from the jar.	0	[]	0	[]
Grind coffee beans	Open the lid of the grinder.	I remove all contents from the jar.	0	[]	0	[]
Grind coffee beans	Pour some coffee beans to the grinder	I remove all contents from the jar.	0	[]	0	[]
Grind coffee beans	Plug in the grinder	I remove all contents from the jar.	0	[]	0	[]
Grind coffee beans	Set the grinding options	I remove all contents from the jar.	0	[]	0	[]
Grind coffee beans	Press the button	I remove all contents from the jar.	0	[]	0	[]
Grind coffee beans	Wait until the grinder stops automatically	I remove all contents from the jar.	0	[]	0	[]
Grind coffee beans	Open the lid of the grinder	I remove all contents from the jar.	0	[]	0	[]
Grind coffee beans	Pour all the grounded coffee into the jar	I remove all contents from the jar.	0	[]	0	[]
Grind coffee beans	Seal the jar	I remove all contents from the jar.	1	[('the jar', 'open', 'less likely')]	1	[('jar', 'sealed', 'True')]
Grind coffee beans	Unplug the grinder.	I remove all contents from the jar.	0	[]	0	[]
Grind coffee beans	Seal the coffee bean bag.	I remove all contents from the jar.	0	[]	0	[]
Grind coffee beans	Prepare a sealed jar	The coffee beans are in the shape of powder.	0	[]	0	[]
Grind coffee beans	Open the lid of the jar	The coffee beans are in the shape of powder.	0	[]	0	[]
Grind coffee beans	Open the coffee bean bag	The coffee beans are in the shape of powder.	0	[]	0	[]
Grind coffee beans	Open the lid of the grinder.	The coffee beans are in the shape of powder.	0	[]	0	[]
Grind coffee beans	Pour some coffee beans to the grinder	The coffee beans are in the shape of powder.	0	[]	0	[]
Grind coffee beans	Plug in the grinder	The coffee beans are in the shape of powder.	0	[]	0	[]
Grind coffee beans	Set the grinding options	The coffee beans are in the shape of powder.	0	[]	0	[]
Grind coffee beans	Press the button	The coffee beans are in the shape of powder.	0	[]	0	[]
Grind coffee beans	Wait until the grinder stops automatically	The coffee beans are in the shape of powder.	2	[('the coffee bean', 'grounded', 'more likely')]	2	[('grinder', 'grinding', 'False')]
Grind coffee beans	Open the lid of the grinder	The coffee beans are in the shape of powder.	0	[]	0	[]
Grind coffee beans	Pour all the grounded coffee into the jar	The coffee beans are in the shape of powder.	0	[]	0	[]
Grind coffee beans	Seal the jar	The coffee beans are in the shape of powder.	0	[]	0	[]
Grind coffee beans	Unplug the grinder.	The coffee beans are in the shape of powder.	0	[]	0	[]
Grind coffee beans	Seal the coffee bean bag.	The coffee beans are in the shape of powder.	0	[]	0	[]
Install a game on PS5	Go to the Playstation store	I can download and play the game.	0	[]	0	[]
Install a game on PS5	Pick a game you like	I can download and play the game.	0	[]	0	[]
Install a game on PS5	Add the game to the cart and provide payment information	I can download and play the game.	0	[]	0	[]
Install a game on PS5	Finish the purchase.	I can download and play the game.	2	[('game', 'bought', 'more likely')]	2	[]
Install a game on PS5	Download and launch the game to start playing.	I can download and play the game.	0	[]	0	[]
Install a game on PS5	Go to the Playstation store	I run the game.	0	[]	0	[]
Install a game on PS5	Pick a game you like	I run the game.	0	[]	0	[]
Install a game on PS5	Add the game to the cart and provide payment information	I run the game.	0	[]	0	[]
Install a game on PS5	Finish the purchase.	I run the game.	0	[]	0	[]
Install a game on PS5	Download and launch the game to start playing.	I run the game.	2	[('the game', 'installed', 'more likely')]	2	[('ps5', 'has_game', 'True')]
Jump a car battery	Open each car's hood and locate the battery	A wire can be used to connect the two cars.	0	[]	2	[]
Jump a car battery	Park the working car near, but not touching, the disabled car.	A wire can be used to connect the two cars.	2	[('the two cars', 'in vincinity', 'more likely')]	0	[]
Jump a car battery	Put on safety gear (goggles and gloves) if you have it.	A wire can be used to connect the two cars.	0	[]	0	[]
Jump a car battery	Untangle and unwind your jumper cables.	A wire can be used to connect the two cars.	0	[]	0	[]
Jump a car battery	Connect the jumper cables	A wire can be used to connect the two cars.	0	[]	0	[]
Jump a car battery	Start the working car.	A wire can be used to connect the two cars.	0	[]	0	[]
Jump a car battery	Start the disabled vehicle	A wire can be used to connect the two cars.	0	[]	0	[]
Jump a car battery	Remove the jumper cables.	A wire can be used to connect the two cars.	0	[]	0	[]
Jump a car battery	Keep the engine running	A wire can be used to connect the two cars.	0	[]	0	[]
Jump a car battery	Open each car's hood and locate the battery	Consistent engine sound comes from the disabled car.	0	[]	0	[]
Jump a car battery	Park the working car near, but not touching, the disabled car.	Consistent engine sound comes from the disabled car.	0	[]	0	[]
Jump a car battery	Put on safety gear (goggles and gloves) if you have it.	Consistent engine sound comes from the disabled car.	0	[]	0	[]
Jump a car battery	Untangle and unwind your jumper cables.	Consistent engine sound comes from the disabled car.	0	[]	0	[]
Jump a car battery	Connect the jumper cables	Consistent engine sound comes from the disabled car.	0	[]	0	[]
Jump a car battery	Start the working car.	Consistent engine sound comes from the disabled car.	0	[]	0	[]
Jump a car battery	Start the disabled vehicle	Consistent engine sound comes from the disabled car.	2	[('the disabled car', 'started', 'more likely')]	2	[('car2', 'running', 'True')]
Jump a car battery	Remove the jumper cables.	Consistent engine sound comes from the disabled car.	0	[]	0	[]
Jump a car battery	Keep the engine running	Consistent engine sound comes from the disabled car.	0	[]	0	[]
Jump a car battery	Open each car's hood and locate the battery	The working car safely drives away.	0	[]	0	[]
Jump a car battery	Park the working car near, but not touching, the disabled car.	The working car safely drives away.	0	[]	0	[]
Jump a car battery	Put on safety gear (goggles and gloves) if you have it.	The working car safely drives away.	0	[]	0	[]
Jump a car battery	Untangle and unwind your jumper cables.	The working car safely drives away.	0	[]	0	[]
Jump a car battery	Connect the jumper cables	The working car safely drives away.	1	[('the working car', 'connected with cables', 'more likely')]	0	[]
Jump a car battery	Start the working car.	The working car safely drives away.	0	[]	0	[]
Jump a car battery	Start the disabled vehicle	The working car safely drives away.	0	[]	0	[]
Jump a car battery	Remove the jumper cables.	The working car safely drives away.	2	[('the working car', 'connected with cables', 'less likely')]	0	[]
Jump a car battery	Keep the engine running	The working car safely drives away.	0	[]	2	[]
Make a pie crust	In a medium bowl, sift the flour, sugar, and salt until the ingredients are completely incorporated.	I can tell what ingredients are used by looking at the mixture.	1	[('ingredients', 'mixed', 'more likely')]	2	[('ingredients', 'mixed', 'True')]
Make a pie crust	Cut in the butter.	I can tell what ingredients are used by looking at the mixture.	0	[]	2	[('ingredients', 'mixed', 'True')]
Make a pie crust	Mix in the egg.	I can tell what ingredients are used by looking at the mixture.	0	[]	2	[('ingredients', 'mixed', 'True')]
Make a pie crust	Turn the dough out onto a floured surface.	I can tell what ingredients are used by looking at the mixture.	0	[]	0	[]
Make a pie crust	Form a disc.	I can tell what ingredients are used by looking at the mixture.	0	[]	0	[]
Make a pie crust	Refrigerate the dough for 1 hour.	I can tell what ingredients are used by looking at the mixture.	0	[]	0	[]
Make a pie crust	Roll out the crust.	I can tell what ingredients are used by looking at the mixture.	0	[]	0	[]
Make a pie crust	Freeze the crust.	I can tell what ingredients are used by looking at the mixture.	0	[]	0	[]
Make a pie crust	Preheat the oven to 350 degrees.	I can tell what ingredients are used by looking at the mixture.	0	[]	0	[]
Make a pie crust	Bake the crust in two stages.	I can tell what ingredients are used by looking at the mixture.	0	[]	0	[]
Make a pie crust	In a medium bowl, sift the flour, sugar, and salt until the ingredients are completely incorporated.	I knead the crust into a different shape.	0	[]	0	[]
Make a pie crust	Cut in the butter.	I knead the crust into a different shape.	0	[]	0	[]
Make a pie crust	Mix in the egg.	I knead the crust into a different shape.	0	[]	0	[]
Make a pie crust	Turn the dough out onto a floured surface.	I knead the crust into a different shape.	0	[]	0	[]
Make a pie crust	Form a disc.	I knead the crust into a different shape.	0	[]	1	[]
Make a pie crust	Refrigerate the dough for 1 hour.	I knead the crust into a different shape.	0	[]	1	[]
Make a pie crust	Roll out the crust.	I knead the crust into a different shape.	0	[]	1	[]
Make a pie crust	Freeze the crust.	I knead the crust into a different shape.	1	[('crust', 'rock hard', 'more likely')]	1	[]
Make a pie crust	Preheat the oven to 350 degrees.	I knead the crust into a different shape.	0	[]	0	[]
Make a pie crust	Bake the crust in two stages.	I knead the crust into a different shape.	0	[]	0	[]
Make a pie crust	In a medium bowl, sift the flour, sugar, and salt until the ingredients are completely incorporated.	The crust can be eaten.	0	[]	0	[]
Make a pie crust	Cut in the butter.	The crust can be eaten.	0	[]	0	[]
Make a pie crust	Mix in the egg.	The crust can be eaten.	0	[]	0	[]
Make a pie crust	Turn the dough out onto a floured surface.	The crust can be eaten.	0	[]	0	[]
Make a pie crust	Form a disc.	The crust can be eaten.	0	[]	0	[]
Make a pie crust	Refrigerate the dough for 1 hour.	The crust can be eaten.	0	[]	0	[]
Make a pie crust	Roll out the crust.	The crust can be eaten.	0	[]	0	[]
Make a pie crust	Freeze the crust.	The crust can be eaten.	0	[]	0	[]
Make a pie crust	Preheat the oven to 350 degrees.	The crust can be eaten.	0	[]	0	[]
Make a pie crust	Bake the crust in two stages.	The crust can be eaten.	2	[('the crust', 'cooked', 'more likely'), ('crust', 'hard', 'more likely')]	2	[('dough', 'cooked', 'True')]
Make a pie crust	In a medium bowl, sift the flour, sugar, and salt until the ingredients are completely incorporated.	The dough is the same shape as the final pie crust.	0	[]	0	[]
Make a pie crust	Cut in the butter.	The dough is the same shape as the final pie crust.	0	[]	0	[]
Make a pie crust	Mix in the egg.	The dough is the same shape as the final pie crust.	0	[]	0	[]
Make a pie crust	Turn the dough out onto a floured surface.	The dough is the same shape as the final pie crust.	0	[]	0	[]
Make a pie crust	Form a disc.	The dough is the same shape as the final pie crust.	2	[('the dough', 'in the shape of a disc', 'more likely')]	2	[]
Make a pie crust	Refrigerate the dough for 1 hour.	The dough is the same shape as the final pie crust.	0	[]	2	[]
Make a pie crust	Roll out the crust.	The dough is the same shape as the final pie crust.	0	[]	2	[]
Make a pie crust	Freeze the crust.	The dough is the same shape as the final pie crust.	0	[]	2	[]
Make a pie crust	Preheat the oven to 350 degrees.	The dough is the same shape as the final pie crust.	0	[]	0	[]
Make a pie crust	Bake the crust in two stages.	The dough is the same shape as the final pie crust.	0	[]	0	[]
Make coffee expresso	Power on the expresso machine	An indicator light shines.	2	[('the coffee machine', 'powered on', 'more likely')]	2	[('coffee_machine', 'on', 'True')]
Make coffee expresso	Turn the machine to expresso mode.	An indicator light shines.	0	[]	0	[]
Make coffee expresso	Open the container where the grounded coffee is.	An indicator light shines.	0	[]	0	[]
Make coffee expresso	Scoop the right amount of coffee to the portafilter.	An indicator light shines.	0	[]	0	[]
Make coffee expresso	Put a cup under the portafilter	An indicator light shines.	0	[]	0	[]
Make coffee expresso	Wait until the expresso mode is ready	An indicator light shines.	0	[]	0	[]
Make coffee expresso	Set the machine to expresso producing mode	An indicator light shines.	0	[]	0	[]
Make coffee expresso	Stop the coffee machine	An indicator light shines.	0	[]	0	[]
Make coffee expresso	Power off the expresso machine	An indicator light shines.	1	[('the coffee machine', 'powered on', 'less likely')]	1	[('coffee_machine', 'on', 'False')]
Make coffee expresso	Power on the expresso machine	I drink the coffee expresso.	0	[]	0	[]
Make coffee expresso	Turn the machine to expresso mode.	I drink the coffee expresso.	0	[]	0	[]
Make coffee expresso	Open the container where the grounded coffee is.	I drink the coffee expresso.	0	[]	0	[]
Make coffee expresso	Scoop the right amount of coffee to the portafilter.	I drink the coffee expresso.	0	[]	0	[]
Make coffee expresso	Put a cup under the portafilter	I drink the coffee expresso.	0	[]	0	[]
Make coffee expresso	Wait until the expresso mode is ready	I drink the coffee expresso.	0	[]	0	[]
Make coffee expresso	Set the machine to expresso producing mode	I drink the coffee expresso.	0	[]	0	[]
Make coffee expresso	Stop the coffee machine	I drink the coffee expresso.	2	[('the expresso', 'ready', 'more likely')]	0	[]
Make coffee expresso	Power off the expresso machine	I drink the coffee expresso.	0	[]	0	[]
Make Colored Light Bulbs	Select a clear, 40 watt bulb.	I can see through the bulb.	0	[]	2	[('bulb', 'clear', 'True')]
Make Colored Light Bulbs	Purchase special heat-resistant glass paint.	I can see through the bulb.	0	[]	0	[]
Make Colored Light Bulbs	Clean your light bulbs with rubbing alcohol.	I can see through the bulb.	0	[]	0	[]
Make Colored Light Bulbs	Prop your light bulb up with tack.	I can see through the bulb.	0	[]	0	[]
Make Colored Light Bulbs	Use small brushes and apply the paint.	I can see through the bulb.	1	[('the bulb', 'transparent', 'less likely')]	1	[('bulb', 'painted', 'True')]
Make Colored Light Bulbs	Allow air-dry paint to dry for 1 hour.	I can see through the bulb.	0	[]	2	[('bulb', 'painted', 'False')]
Make Colored Light Bulbs	Select a clear, 40 watt bulb.	I touch the bulb and have paints on my hand.	0	[]	0	[]
Make Colored Light Bulbs	Purchase special heat-resistant glass paint.	I touch the bulb and have paints on my hand.	0	[]	0	[]
Make Colored Light Bulbs	Clean your light bulbs with rubbing alcohol.	I touch the bulb and have paints on my hand.	0	[]	0	[]
Make Colored Light Bulbs	Prop your light bulb up with tack.	I touch the bulb and have paints on my hand.	0	[]	0	[]
Make Colored Light Bulbs	Use small brushes and apply the paint.	I touch the bulb and have paints on my hand.	2	[('the paint', 'wet', 'more likely')]	2	[]
Make Colored Light Bulbs	Allow air-dry paint to dry for 1 hour.	I touch the bulb and have paints on my hand.	1	[('the paint', 'wet', 'less likely')]	1	[]
Make packaged ramen in microwave	Remove the noodles from the package.	I can pick up some ramen with chopsticks.	0	[]	0	[]
Make packaged ramen in microwave	Put the noodles into a microwave safe bowl	I can pick up some ramen with chopsticks.	0	[]	0	[]
Make packaged ramen in microwave	Add water such that the noodles are covered	I can pick up some ramen with chopsticks.	0	[]	0	[]
Make packaged ramen in microwave	Microwave the noodles for three to five minutes	I can pick up some ramen with chopsticks.	2	[('ramen', 'soft', 'more likely'), ('ramen', 'in boiling water', 'more likely'), ('water', 'boiling', 'more likely')]	0	[]
Make packaged ramen in microwave	Let the noodles sit in the microwave for three minutes after the microwave stops.	I can pick up some ramen with chopsticks.	0	[]	0	[]
Make packaged ramen in microwave	Take the bowl out of the microwave.	I can pick up some ramen with chopsticks.	0	[]	0	[]
Make packaged ramen in microwave	Add in the flavor packet.	I can pick up some ramen with chopsticks.	0	[]	0	[]
Make packaged ramen in microwave	Remove the noodles from the package.	The ramen can be returned to the store.	1	[('package', 'broken', 'more likely')]	1	[('ramen', 'packaged', 'False')]
Make packaged ramen in microwave	Put the noodles into a microwave safe bowl	The ramen can be returned to the store.	0	[]	0	[]
Make packaged ramen in microwave	Add water such that the noodles are covered	The ramen can be returned to the store.	0	[]	0	[]
Make packaged ramen in microwave	Microwave the noodles for three to five minutes	The ramen can be returned to the store.	0	[]	0	[]
Make packaged ramen in microwave	Let the noodles sit in the microwave for three minutes after the microwave stops.	The ramen can be returned to the store.	0	[]	0	[]
Make packaged ramen in microwave	Take the bowl out of the microwave.	The ramen can be returned to the store.	0	[]	0	[]
Make packaged ramen in microwave	Add in the flavor packet.	The ramen can be returned to the store.	0	[]	2	[('ramen', 'flavored', 'True')]
Make scrambled eggs	Pre-heat the pan with medium to high heat.	I start eating the eggs.	0	[]	0	[]
Make scrambled eggs	Crack some eggs into a mixing bowl.	I start eating the eggs.	0	[]	0	[]
Make scrambled eggs	Whisk the eggs until the mixture has a consistent color.	I start eating the eggs.	0	[]	0	[]
Make scrambled eggs	Add oil to the pan.	I start eating the eggs.	0	[]	0	[]
Make scrambled eggs	Add the eggs to the pan.	I start eating the eggs.	0	[]	0	[]
Make scrambled eggs	Stir gently and frequently to separate the eggs.	I start eating the eggs.	0	[]	0	[]
Make scrambled eggs	Turn off the heat and serve the eggs.	I start eating the eggs.	2	[('the eggs', 'in the pan', 'less likely')]	2	[]
Make scrambled eggs	Pre-heat the pan with medium to high heat.	I touch the pan surface and get injured.	2	[('the pan', 'hot', 'more likely')]	2	[('pan', 'hot', 'True')]
Make scrambled eggs	Crack some eggs into a mixing bowl.	I touch the pan surface and get injured.	0	[]	0	[]
Make scrambled eggs	Whisk the eggs until the mixture has a consistent color.	I touch the pan surface and get injured.	0	[]	0	[]
Make scrambled eggs	Add oil to the pan.	I touch the pan surface and get injured.	0	[]	0	[]
Make scrambled eggs	Add the eggs to the pan.	I touch the pan surface and get injured.	0	[]	0	[]
Make scrambled eggs	Stir gently and frequently to separate the eggs.	I touch the pan surface and get injured.	0	[]	0	[]
Make scrambled eggs	Turn off the heat and serve the eggs.	I touch the pan surface and get injured.	0	[]	1	[('pan', 'hot', 'False')]
Make scrambled eggs	Pre-heat the pan with medium to high heat.	My hands get greasy if I touch the pan.	0	[]	0	[]
Make scrambled eggs	Crack some eggs into a mixing bowl.	My hands get greasy if I touch the pan.	0	[]	0	[]
Make scrambled eggs	Whisk the eggs until the mixture has a consistent color.	My hands get greasy if I touch the pan.	0	[]	0	[]
Make scrambled eggs	Add oil to the pan.	My hands get greasy if I touch the pan.	2	[('the pan', 'clean', 'less likely')]	2	[('pan', 'oiled', 'True')]
Make scrambled eggs	Add the eggs to the pan.	My hands get greasy if I touch the pan.	0	[]	0	[]
Make scrambled eggs	Stir gently and frequently to separate the eggs.	My hands get greasy if I touch the pan.	0	[]	0	[]
Make scrambled eggs	Turn off the heat and serve the eggs.	My hands get greasy if I touch the pan.	0	[]	0	[]
Make scrambled eggs	Pre-heat the pan with medium to high heat.	The eggs solidify.	0	[]	0	[]
Make scrambled eggs	Crack some eggs into a mixing bowl.	The eggs solidify.	0	[]	0	[]
Make scrambled eggs	Whisk the eggs until the mixture has a consistent color.	The eggs solidify.	0	[]	0	[]
Make scrambled eggs	Add oil to the pan.	The eggs solidify.	0	[]	0	[]
Make scrambled eggs	Add the eggs to the pan.	The eggs solidify.	2	[('the eggs', 'in the hot pan', 'more likely')]	2	[('eggs', 'cooked', 'True')]
Make scrambled eggs	Stir gently and frequently to separate the eggs.	The eggs solidify.	2	[]	0	[]
Make scrambled eggs	Turn off the heat and serve the eggs.	The eggs solidify.	0	[]	0	[]
Make tea with tea bags	Heat water to a boil with an electric kettle.	I put the tea bag back to its box.	0	[]	0	[]
Make tea with tea bags	Place the tea bag in a mug.	I put the tea bag back to its box.	0	[]	1	[('tea_bag', 'in_mug', 'True')]
Make tea with tea bags	Carefully pour the boiling water to the mug.	I put the tea bag back to its box.	1	[('the tea bag', 'wet', 'more likely')]	0	[]
Make tea with tea bags	Drink the hot tea carefully.	I put the tea bag back to its box.	0	[]	0	[]
Make tea with tea bags	Heat water to a boil with an electric kettle.	It is dangerous if the mug is knocked over.	0	[]	0	[]
Make tea with tea bags	Place the tea bag in a mug.	It is dangerous if the mug is knocked over.	0	[]	0	[]
Make tea with tea bags	Carefully pour the boiling water to the mug.	It is dangerous if the mug is knocked over.	2	[('the mug', 'containing hot water', 'more likely')]	2	[('water', 'hot', 'True'), ('mug', 'has_water', 'True')]
Make tea with tea bags	Drink the hot tea carefully.	It is dangerous if the mug is knocked over.	0	[]	1	[('water', 'hot', 'False'), ('mug', 'has_water', 'False')]
Make tea with tea bags	Heat water to a boil with an electric kettle.	The water has a taste of tea.	0	[]	0	[]
Make tea with tea bags	Place the tea bag in a mug.	The water has a taste of tea.	0	[]	0	[]
Make tea with tea bags	Carefully pour the boiling water to the mug.	The water has a taste of tea.	2	[('the water', 'transparent', 'less likely')]	2	[]
Make tea with tea bags	Drink the hot tea carefully.	The water has a taste of tea.	0	[]	1	[]
Make tea with tea bags	Heat water to a boil with an electric kettle.	There is a sound coming from the kettle.	2	[('water', 'boiling', 'more likely')]	2	[('kettle', 'on', 'True')]
Make tea with tea bags	Place the tea bag in a mug.	There is a sound coming from the kettle.	0	[]	0	[]
Make tea with tea bags	Carefully pour the boiling water to the mug.	There is a sound coming from the kettle.	1	[('water', 'boiling', 'less likely')]	0	[]
Make tea with tea bags	Drink the hot tea carefully.	There is a sound coming from the kettle.	0	[]	0	[]
Order food delivery with an app	Choose a restaurant.	I start eating the food I ordered.	0	[]	0	[]
Order food delivery with an app	Add the dishes that you want to order to the shopping cart.	I start eating the food I ordered.	0	[]	0	[]
Order food delivery with an app	Verify your delivery address and instructions.	I start eating the food I ordered.	0	[]	0	[]
Order food delivery with an app	Pay.	I start eating the food I ordered.	0	[]	0	[]
Order food delivery with an app	Track delivery status and call the driver if needed.	I start eating the food I ordered.	0	[]	0	[]
Order food delivery with an app	Pick up the food and enjoy.	I start eating the food I ordered.	2	[('the food', 'received', 'more likely')]	2	[('food', 'delivered', 'True')]
Order food delivery with an app	Choose a restaurant.	The restaurant knows what food to prepare for me.	0	[]	0	[]
Order food delivery with an app	Add the dishes that you want to order to the shopping cart.	The restaurant knows what food to prepare for me.	0	[]	2	[]
Order food delivery with an app	Verify your delivery address and instructions.	The restaurant knows what food to prepare for me.	0	[]	0	[]
Order food delivery with an app	Pay.	The restaurant knows what food to prepare for me.	2	[('the order', 'placed', 'more likely')]	0	[]
Order food delivery with an app	Track delivery status and call the driver if needed.	The restaurant knows what food to prepare for me.	0	[]	0	[]
Order food delivery with an app	Pick up the food and enjoy.	The restaurant knows what food to prepare for me.	0	[]	0	[]
Place a Coin in the Door Hinge	Grab a coin.	A person enters through the door.	0	[]	0	[]
Place a Coin in the Door Hinge	Open the door slightly.	A person enters through the door.	2	[('the door', 'open', 'more likely')]	0	[]
Place a Coin in the Door Hinge	Insert the coin into the upper hinge.	A person enters through the door.	0	[]	2	[('coin', 'inserted', 'True')]
Place a Coin in the Door Hinge	Secure the coin with tape, if necessary.	A person enters through the door.	0	[]	0	[]
Place a Coin in the Door Hinge	Try a coin in the lower hinge if this does not work.	A person enters through the door.	0	[]	0	[]
Place a Coin in the Door Hinge	Grab a coin.	I fully open the door.	0	[]	0	[]
Place a Coin in the Door Hinge	Open the door slightly.	I fully open the door.	0	[]	1	[('door', 'open', 'True')]
Place a Coin in the Door Hinge	Insert the coin into the upper hinge.	I fully open the door.	1	[('the coin', 'in the hinge', 'more likely')]	0	[]
Place a Coin in the Door Hinge	Secure the coin with tape, if necessary.	I fully open the door.	0	[]	0	[]
Place a Coin in the Door Hinge	Try a coin in the lower hinge if this does not work.	I fully open the door.	0	[]	0	[]
Play the clarinet	Inspect the parts of the clarinet.	Someone can play a tune with the clarinet.	0	[]	0	[]
Play the clarinet	Assemble the mouthpiece and reed properly.	Someone can play a tune with the clarinet.	2	[('the clarinet', 'assembled', 'more likely')]	2	[('clarinet', 'assembled', 'True')]
Play the clarinet	Hold the clarinet properly.	Someone can play a tune with the clarinet.	0	[]	0	[]
Play the clarinet	Disassemble and clean the clarinet after each use.	Someone can play a tune with the clarinet.	1	[('the clarinet', 'fully assembled', 'less likely')]	0	[]
Prepare a custartd ice cream base	Simmer the milk.	I drink the milk and burn my tongue.	2	[('milk', 'hot', 'more likely')]	2	[('milk', 'hot', 'True')]
Prepare a custartd ice cream base	Combine the eggs, sugar, and salt.	I drink the milk and burn my tongue.	0	[]	0	[]
Prepare a custartd ice cream base	Cool the milk and add it to the egg mixture.	I drink the milk and burn my tongue.	1	[('milk', 'hot', 'less likely')]	1	[('milk', 'hot', 'False')]
Prepare a custartd ice cream base	Transfer the mixture to a pot and heat it until it reaches 170 degrees.	I drink the milk and burn my tongue.	0	[]	2	[('milk', 'hot', 'True')]
Prepare a custartd ice cream base	Strain the mixture over an ice bath and add vanilla.	I drink the milk and burn my tongue.	0	[]	1	[('vanilla', 'added', 'True'), ('milk', 'hot', 'False')]
Prepare a custartd ice cream base	Chill the mixture for a half hour.	I drink the milk and burn my tongue.	0	[]	1	[('milk', 'hot', 'False')]
Prepare a custartd ice cream base	Simmer the milk.	The is smoke above the mixture.	0	[]	0	[]
Prepare a custartd ice cream base	Combine the eggs, sugar, and salt.	The is smoke above the mixture.	0	[]	0	[]
Prepare a custartd ice cream base	Cool the milk and add it to the egg mixture.	The is smoke above the mixture.	0	[]	0	[]
Prepare a custartd ice cream base	Transfer the mixture to a pot and heat it until it reaches 170 degrees.	The is smoke above the mixture.	2	[('the mixture', 'hot', 'more likely')]	2	[]
Prepare a custartd ice cream base	Strain the mixture over an ice bath and add vanilla.	The is smoke above the mixture.	1	[('the mixture', 'hot', 'less likely')]	1	[]
Prepare a custartd ice cream base	Chill the mixture for a half hour.	The is smoke above the mixture.	0	[]	0	[]
Prepare a custartd ice cream base	Simmer the milk.	The mixture can be flaked with a fork.	0	[]	0	[]
Prepare a custartd ice cream base	Combine the eggs, sugar, and salt.	The mixture can be flaked with a fork.	0	[]	0	[]
Prepare a custartd ice cream base	Cool the milk and add it to the egg mixture.	The mixture can be flaked with a fork.	0	[]	0	[]
Prepare a custartd ice cream base	Transfer the mixture to a pot and heat it until it reaches 170 degrees.	The mixture can be flaked with a fork.	2	[('the mixture', 'hard', 'more likely')]	2	[]
Prepare a custartd ice cream base	Strain the mixture over an ice bath and add vanilla.	The mixture can be flaked with a fork.	0	[]	0	[]
Prepare a custartd ice cream base	Chill the mixture for a half hour.	The mixture can be flaked with a fork.	0	[]	0	[]
Project computer screen with an HDMI cable	Turn on the computer.	I adjust the display settings of the computer.	2	[('computer', 'powered on', 'more likely')]	2	[('computer', 'on', 'True')]
Project computer screen with an HDMI cable	Turn on the monitor.	I adjust the display settings of the computer.	0	[]	0	[]
Project computer screen with an HDMI cable	Select the correct source of the monitor.	I adjust the display settings of the computer.	0	[]	0	[]
Project computer screen with an HDMI cable	Connect the computer and the monitor with an HDMI cable.	I adjust the display settings of the computer.	0	[]	0	[]
Project computer screen with an HDMI cable	Adjust the projection settings on the computer.	I adjust the display settings of the computer.	0	[]	0	[]
Project computer screen with an HDMI cable	Turn on the computer.	I adjust the display settings of the monitor.	0	[]	0	[]
Project computer screen with an HDMI cable	Turn on the monitor.	I adjust the display settings of the monitor.	2	[('monitor', 'powered on', 'more likely')]	2	[('monitor', 'on', 'True')]
Project computer screen with an HDMI cable	Select the correct source of the monitor.	I adjust the display settings of the monitor.	0	[]	0	[]
Project computer screen with an HDMI cable	Connect the computer and the monitor with an HDMI cable.	I adjust the display settings of the monitor.	0	[]	0	[]
Project computer screen with an HDMI cable	Adjust the projection settings on the computer.	I adjust the display settings of the monitor.	0	[]	0	[]
Project computer screen with an HDMI cable	Turn on the computer.	The monitor projects images from the computer.	0	[]	0	[]
Project computer screen with an HDMI cable	Turn on the monitor.	The monitor projects images from the computer.	0	[]	0	[]
Project computer screen with an HDMI cable	Select the correct source of the monitor.	The monitor projects images from the computer.	0	[]	0	[]
Project computer screen with an HDMI cable	Connect the computer and the monitor with an HDMI cable.	The monitor projects images from the computer.	2	[('HDMI cable', 'connected in both ends', 'more likely')]	2	[('hdmi_cable', 'connected', 'True')]
Project computer screen with an HDMI cable	Adjust the projection settings on the computer.	The monitor projects images from the computer.	0	[]	0	[]
Schedule a virtual meeting	Decide on a topic and a list of meeting attendees.	I cancel the meeting.	0	[]	0	[]
Schedule a virtual meeting	Reach out to the attendees to find a time that works.	I cancel the meeting.	0	[]	0	[]
Schedule a virtual meeting	Choose a virtual meeting application such as Zoom and schedule a meeting.	I cancel the meeting.	0	[]	0	[]
Schedule a virtual meeting	Send the meeting information to everyone.	I cancel the meeting.	0	[]	0	[]
Schedule a virtual meeting	Send a reminder before the meeting.	I cancel the meeting.	0	[]	0	[]
Schedule a virtual meeting	Start meeting.	I cancel the meeting.	1	[('the meeting', 'started', 'more likely')]	1	[]
Schedule a virtual meeting	Decide on a topic and a list of meeting attendees.	I expect that some people will show up.	0	[]	0	[]
Schedule a virtual meeting	Reach out to the attendees to find a time that works.	I expect that some people will show up.	2	[('the attendees', 'been notified of the meeting', 'more likely')]	0	[]
Schedule a virtual meeting	Choose a virtual meeting application such as Zoom and schedule a meeting.	I expect that some people will show up.	0	[]	0	[]
Schedule a virtual meeting	Send the meeting information to everyone.	I expect that some people will show up.	0	[]	0	[]
Schedule a virtual meeting	Send a reminder before the meeting.	I expect that some people will show up.	0	[]	0	[]
Schedule a virtual meeting	Start meeting.	I expect that some people will show up.	0	[]	2	[('meeting', 'started', 'True')]
Sear a steak	Set the steak at room temperature.	A sizzling sound can be heard if I add vegetables to the pan.	0	[]	0	[]
Sear a steak	Heat the pan.	A sizzling sound can be heard if I add vegetables to the pan.	0	[]	0	[]
Sear a steak	Put olive oil in the pan until smoking.	A sizzling sound can be heard if I add vegetables to the pan.	2	[('the pan', 'greased', 'more likely')]	2	[]
Sear a steak	Add the steak and sear until both sides are browned.	A sizzling sound can be heard if I add vegetables to the pan.	0	[]	2	[]
Sear a steak	Place the pan in the oven until desired cookedness.	A sizzling sound can be heard if I add vegetables to the pan.	0	[]	0	[]
Sear a steak	Remove the steak from the pan and serve with sauce.	A sizzling sound can be heard if I add vegetables to the pan.	0	[]	0	[]
Sear a steak	Let the pan cool and wash it.	A sizzling sound can be heard if I add vegetables to the pan.	1	[]	0	[]
Sear a steak	Set the steak at room temperature.	I eat the steak without getting sick.	0	[]	0	[]
Sear a steak	Heat the pan.	I eat the steak without getting sick.	0	[]	0	[]
Sear a steak	Put olive oil in the pan until smoking.	I eat the steak without getting sick.	0	[]	0	[]
Sear a steak	Add the steak and sear until both sides are browned.	I eat the steak without getting sick.	2	[('the steak', 'cooked', 'more likely')]	0	[]
Sear a steak	Place the pan in the oven until desired cookedness.	I eat the steak without getting sick.	2	[('the steak', 'cooked', 'more likely')]	2	[('steak', 'cooked', 'True')]
Sear a steak	Remove the steak from the pan and serve with sauce.	I eat the steak without getting sick.	0	[]	0	[]
Sear a steak	Let the pan cool and wash it.	I eat the steak without getting sick.	0	[]	0	[]
Sear a steak	Set the steak at room temperature.	I touch the pan without getting burned.	0	[]	0	[]
Sear a steak	Heat the pan.	I touch the pan without getting burned.	1	[('the pan', 'hot', 'more likely')]	1	[('pan', 'hot', 'True')]
Sear a steak	Put olive oil in the pan until smoking.	I touch the pan without getting burned.	0	[]	1	[('pan', 'oil', 'True')]
Sear a steak	Add the steak and sear until both sides are browned.	I touch the pan without getting burned.	0	[]	1	[('steak', 'seared', 'True')]
Sear a steak	Place the pan in the oven until desired cookedness.	I touch the pan without getting burned.	0	[]	0	[]
Sear a steak	Remove the steak from the pan and serve with sauce.	I touch the pan without getting burned.	0	[]	0	[]
Sear a steak	Let the pan cool and wash it.	I touch the pan without getting burned.	2	[('the pan', 'greased', 'less likely'), ('the pan', 'hot', 'less likely')]	2	[('pan', 'oil', 'False'), ('pan', 'hot', 'False')]
Set up a tent	Lay a tarp down before putting up your tent.	A person walks under the tent.	0	[]	0	[]
Set up a tent	Lay out and account for all the components of your tent.	A person walks under the tent.	0	[]	0	[]
Set up a tent	Lay your tent onto the tarp.	A person walks under the tent.	0	[]	0	[]
Set up a tent	Connect your tent poles.	A person walks under the tent.	0	[]	0	[]
Set up a tent	Insert tent poles into the corresponding flaps in the tent.	A person walks under the tent.	0	[]	0	[]
Set up a tent	Raise the tent.	A person walks under the tent.	2	[('tent', 'raised', 'more likely')]	2	[('tent', 'raised', 'True')]
Set up a tent	Stake the tent to the ground.	A person walks under the tent.	0	[]	0	[]
Set up a tent	Add on the rain fly.	A person walks under the tent.	0	[]	0	[]
Set up a tent	Lay a tarp down before putting up your tent.	The poles can support the weight of a tent.	0	[]	0	[]
Set up a tent	Lay out and account for all the components of your tent.	The poles can support the weight of a tent.	0	[]	0	[]
Set up a tent	Lay your tent onto the tarp.	The poles can support the weight of a tent.	0	[]	0	[]
Set up a tent	Connect your tent poles.	The poles can support the weight of a tent.	0	[]	0	[]
Set up a tent	Insert tent poles into the corresponding flaps in the tent.	The poles can support the weight of a tent.	2	[('the tent poles', 'upright', 'more likely')]	2	[('poles', 'inserted', 'True')]
Set up a tent	Raise the tent.	The poles can support the weight of a tent.	0	[]	0	[]
Set up a tent	Stake the tent to the ground.	The poles can support the weight of a tent.	0	[]	0	[]
Set up a tent	Add on the rain fly.	The poles can support the weight of a tent.	0	[]	0	[]
Set up a tent	Lay a tarp down before putting up your tent.	The tent gets wet inside if it rains.	0	[]	0	[]
Set up a tent	Lay out and account for all the components of your tent.	The tent gets wet inside if it rains.	0	[]	0	[]
Set up a tent	Lay your tent onto the tarp.	The tent gets wet inside if it rains.	0	[]	0	[]
Set up a tent	Connect your tent poles.	The tent gets wet inside if it rains.	0	[]	0	[]
Set up a tent	Insert tent poles into the corresponding flaps in the tent.	The tent gets wet inside if it rains.	0	[]	0	[]
Set up a tent	Raise the tent.	The tent gets wet inside if it rains.	0	[]	0	[]
Set up a tent	Stake the tent to the ground.	The tent gets wet inside if it rains.	0	[]	0	[]
Set up a tent	Add on the rain fly.	The tent gets wet inside if it rains.	1	[('the tent', 'covered with a rain fly', 'more likely')]	1	[('fly', 'attached', 'True')]
Set up a tent	Lay a tarp down before putting up your tent.	Wind blows the tent away.	0	[]	0	[]
Set up a tent	Lay out and account for all the components of your tent.	Wind blows the tent away.	0	[]	0	[]
Set up a tent	Lay your tent onto the tarp.	Wind blows the tent away.	0	[]	0	[]
Set up a tent	Connect your tent poles.	Wind blows the tent away.	0	[]	0	[]
Set up a tent	Insert tent poles into the corresponding flaps in the tent.	Wind blows the tent away.	0	[]	0	[]
Set up a tent	Raise the tent.	Wind blows the tent away.	0	[]	2	[]
Set up a tent	Stake the tent to the ground.	Wind blows the tent away.	1	[('the tent', 'fixated to the ground', 'more likely')]	1	[('tent', 'staked', 'True')]
Set up a tent	Add on the rain fly.	Wind blows the tent away.	0	[]	0	[]
Start a YouTube channel	Decide on a theme and be prepared to stick to it in the long run.	Someone finds my video using a URL.	0	[]	0	[]
Start a YouTube channel	Come up with a channel name.	Someone finds my video using a URL.	0	[]	0	[]
Start a YouTube channel	Register a Google account if you don't have one.	Someone finds my video using a URL.	0	[]	0	[]
Start a YouTube channel	Create your YouTube channel with your Google account.	Someone finds my video using a URL.	2	[('the channel', 'accessible', 'more likely')]	2	[('channel', 'created', 'True')]
Start a YouTube channel	Procure a banner art and add it to your main page.	Someone finds my video using a URL.	0	[]	0	[]
Start a YouTube channel	Upload your first video.	Someone finds my video using a URL.	0	[]	0	[]
Start a YouTube channel	Interact with comments.	Someone finds my video using a URL.	0	[]	0	[]
Start a YouTube channel	Track statistics in the Creator Studio.	Someone finds my video using a URL.	0	[]	0	[]
Start a YouTube channel	Decide on a theme and be prepared to stick to it in the long run.	Someone watches a video from my channel.	0	[]	0	[]
Start a YouTube channel	Come up with a channel name.	Someone watches a video from my channel.	0	[]	0	[]
Start a YouTube channel	Register a Google account if you don't have one.	Someone watches a video from my channel.	0	[]	0	[]
Start a YouTube channel	Create your YouTube channel with your Google account.	Someone watches a video from my channel.	0	[]	0	[]
Start a YouTube channel	Procure a banner art and add it to your main page.	Someone watches a video from my channel.	0	[]	0	[]
Start a YouTube channel	Upload your first video.	Someone watches a video from my channel.	2	[('your channel', 'have a video', 'more likely')]	2	[('channel', 'video', 'True')]
Start a YouTube channel	Interact with comments.	Someone watches a video from my channel.	0	[]	0	[]
Start a YouTube channel	Track statistics in the Creator Studio.	Someone watches a video from my channel.	0	[]	0	[]
Stay at a hotel	Find a suitable hotel online.	I have a hotel room key.	0	[]	0	[]
Stay at a hotel	Book a reservation by using the hotel website or calling the hotel.	I have a hotel room key.	0	[]	0	[]
Stay at a hotel	Arrive at the hotel.	I have a hotel room key.	0	[]	0	[]
Stay at a hotel	Check in at the front desk and receive your room key.	I have a hotel room key.	2	[('I', 'checked in to the hotel', 'more likely')]	2	[('hotel', 'room_key', 'True')]
Stay at a hotel	Arrive at the room.	I have a hotel room key.	0	[]	0	[]
Stay at a hotel	Order in-room dining and use the hotel's amenities such as gym and spa.	I have a hotel room key.	0	[]	0	[]
Stay at a hotel	Check out from the hotel.	I have a hotel room key.	1	[('you', 'staying in the hotel', 'less likely')]	1	[('hotel', 'room_key', 'False')]
Stay at a hotel	Find a suitable hotel online.	The hotel knows when I’m arriving.	0	[]	0	[]
Stay at a hotel	Book a reservation by using the hotel website or calling the hotel.	The hotel knows when I’m arriving.	2	[('hotel room', 'booked', 'more likely')]	2	[('hotel', 'reservation', 'True')]
Stay at a hotel	Arrive at the hotel.	The hotel knows when I’m arriving.	0	[]	0	[]
Stay at a hotel	Check in at the front desk and receive your room key.	The hotel knows when I’m arriving.	0	[]	0	[]
Stay at a hotel	Arrive at the room.	The hotel knows when I’m arriving.	0	[]	0	[]
Stay at a hotel	Order in-room dining and use the hotel's amenities such as gym and spa.	The hotel knows when I’m arriving.	0	[]	0	[]
Stay at a hotel	Check out from the hotel.	The hotel knows when I’m arriving.	0	[]	0	[]
Steam broccoli	Clean the broccoli.	I eat the broccoli and my mouth burns.	0	[]	0	[]
Steam broccoli	Trim the stem and cut the florets.	I eat the broccoli and my mouth burns.	0	[]	0	[]
Steam broccoli	Place a steamer basket in a saucepan.	I eat the broccoli and my mouth burns.	0	[]	0	[]
Steam broccoli	Place the broccoli in the steamer basket.	I eat the broccoli and my mouth burns.	0	[]	0	[]
Steam broccoli	Steam the broccoli.	I eat the broccoli and my mouth burns.	2	[('the broccoli', 'hot', 'more likely'), ('the broccoli', 'cooked', 'more likely')]	2	[('broccoli', 'cooked', 'True')]
Steam broccoli	Remove it from heat.	I eat the broccoli and my mouth burns.	0	[]	0	[]
Steam broccoli	Serve.	I eat the broccoli and my mouth burns.	0	[]	0	[]
Store Fresh Mushrooms	Clean the mushrooms first	I eat the mushrooms safely.	0	[]	0	[]
Store Fresh Mushrooms	Brush with towel or mushroom brush	I eat the mushrooms safely.	0	[]	0	[]
Store Fresh Mushrooms	Slice and saute the mushrooms.	I eat the mushrooms safely.	2	[('the mushroom', 'cooked', 'more likely'), ('the mushrooms', 'hot', 'more likely')]	0	[]
Store Fresh Mushrooms	Let the mushrooms cool	I eat the mushrooms safely.	0	[]	0	[]
Store Fresh Mushrooms	Freeze in plastic resealable bags	I eat the mushrooms safely.	0	[]	2	[('mushrooms', 'frozen', 'True')]
Store Fresh Mushrooms	Clean the mushrooms first	I eat the mushrooms.	0	[]	0	[]
Store Fresh Mushrooms	Brush with towel or mushroom brush	I eat the mushrooms.	0	[]	0	[]
Store Fresh Mushrooms	Slice and saute the mushrooms.	I eat the mushrooms.	0	[]	0	[]
Store Fresh Mushrooms	Let the mushrooms cool	I eat the mushrooms.	0	[]	0	[]
Store Fresh Mushrooms	Freeze in plastic resealable bags	I eat the mushrooms.	1	[('the mushroom', 'frozen', 'more likely')]	0	[]
Store Sweet Potato Pie	Let the pie cool completely on a wire rack.	I eat the pie	0	[]	0	[]
Store Sweet Potato Pie	Wrap the pie pan in plastic wrap to make it air-tight.	I eat the pie	1	[('pie', 'wrapped', 'more likely')]	0	[]
Store Sweet Potato Pie	Put a layer of foil around the outside of the pie pan.	I eat the pie	0	[]	0	[]
Store Sweet Potato Pie	Keep the pie in the freezer for up to 1 month	I eat the pie	0	[]	1	[('pie', 'frozen', 'True')]
Store Sweet Potato Pie	Let the pie cool completely on a wire rack.	The pie is rock hard.	0	[]	0	[]
Store Sweet Potato Pie	Wrap the pie pan in plastic wrap to make it air-tight.	The pie is rock hard.	0	[]	0	[]
Store Sweet Potato Pie	Put a layer of foil around the outside of the pie pan.	The pie is rock hard.	0	[]	0	[]
Store Sweet Potato Pie	Keep the pie in the freezer for up to 1 month	The pie is rock hard.	2	[('the pie', 'frozen', 'more likely')]	2	[]
Take domestic flights	Book a flight.	I have a ticket number for the flight.	2	[('your ticket', 'purchased', 'more likely')]	2	[('flight', 'booked', 'True')]
Take domestic flights	Arrive at the airport at least 1 hour prior to boarding.	I have a ticket number for the flight.	0	[]	0	[]
Take domestic flights	Check in using the airline app or at the counter.	I have a ticket number for the flight.	0	[]	0	[]
Take domestic flights	Check bags if any.	I have a ticket number for the flight.	0	[]	0	[]
Take domestic flights	Go through airport security.	I have a ticket number for the flight.	0	[]	0	[]
Take domestic flights	Wait at the boarding gate or walk around in the terminal.	I have a ticket number for the flight.	0	[]	0	[]
Take domestic flights	Board the plane when your group is called.	I have a ticket number for the flight.	0	[]	0	[]
Take domestic flights	Sit through the flight after take-off.	I have a ticket number for the flight.	0	[]	0	[]
Take domestic flights	After the plane lands, exit the plane with all carry-on items.	I have a ticket number for the flight.	0	[]	0	[]
Take domestic flights	Exit to baggage claim.	I have a ticket number for the flight.	0	[]	0	[]
Take domestic flights	Take transportation.	I have a ticket number for the flight.	0	[]	0	[]
Take domestic flights	Book a flight.	I have my boarding pass ready.	0	[]	0	[]
Take domestic flights	Arrive at the airport at least 1 hour prior to boarding.	I have my boarding pass ready.	0	[]	0	[]
Take domestic flights	Check in using the airline app or at the counter.	I have my boarding pass ready.	2	[]	2	[('flight', 'checked_in', 'True')]
Take domestic flights	Check bags if any.	I have my boarding pass ready.	0	[]	0	[]
Take domestic flights	Go through airport security.	I have my boarding pass ready.	0	[]	0	[]
Take domestic flights	Wait at the boarding gate or walk around in the terminal.	I have my boarding pass ready.	0	[]	0	[]
Take domestic flights	Board the plane when your group is called.	I have my boarding pass ready.	0	[]	0	[]
Take domestic flights	Sit through the flight after take-off.	I have my boarding pass ready.	0	[]	0	[]
Take domestic flights	After the plane lands, exit the plane with all carry-on items.	I have my boarding pass ready.	0	[]	0	[]
Take domestic flights	Exit to baggage claim.	I have my boarding pass ready.	0	[]	0	[]
Take domestic flights	Take transportation.	I have my boarding pass ready.	0	[]	0	[]
Take domestic flights	Book a flight.	I make a phone call.	0	[]	0	[]
Take domestic flights	Arrive at the airport at least 1 hour prior to boarding.	I make a phone call.	0	[]	0	[]
Take domestic flights	Check in using the airline app or at the counter.	I make a phone call.	0	[]	0	[]
Take domestic flights	Check bags if any.	I make a phone call.	0	[]	0	[]
Take domestic flights	Go through airport security.	I make a phone call.	0	[]	0	[]
Take domestic flights	Wait at the boarding gate or walk around in the terminal.	I make a phone call.	0	[]	0	[]
Take domestic flights	Board the plane when your group is called.	I make a phone call.	0	[]	0	[]
Take domestic flights	Sit through the flight after take-off.	I make a phone call.	1	[('I', 'in the air', 'more likely'), ('I', 'at the airport', 'less likely')]	0	[]
Take domestic flights	After the plane lands, exit the plane with all carry-on items.	I make a phone call.	2	[('I', 'in the air', 'less likely'), ('I', 'at the airport', 'more likely')]	0	[]
Take domestic flights	Exit to baggage claim.	I make a phone call.	0	[]	0	[]
Take domestic flights	Take transportation.	I make a phone call.	0	[]	0	[]
Take domestic flights	Book a flight.	I pack another shirt into my suitcase.	0	[]	0	[]
Take domestic flights	Arrive at the airport at least 1 hour prior to boarding.	I pack another shirt into my suitcase.	1	[('I', 'at the airport', 'more likely')]	0	[]
Take domestic flights	Check in using the airline app or at the counter.	I pack another shirt into my suitcase.	0	[]	0	[]
Take domestic flights	Check bags if any.	I pack another shirt into my suitcase.	0	[]	1	[('suitcase', 'checked', 'True')]
Take domestic flights	Go through airport security.	I pack another shirt into my suitcase.	0	[]	0	[]
Take domestic flights	Wait at the boarding gate or walk around in the terminal.	I pack another shirt into my suitcase.	0	[]	0	[]
Take domestic flights	Board the plane when your group is called.	I pack another shirt into my suitcase.	0	[]	0	[]
Take domestic flights	Sit through the flight after take-off.	I pack another shirt into my suitcase.	0	[]	0	[]
Take domestic flights	After the plane lands, exit the plane with all carry-on items.	I pack another shirt into my suitcase.	0	[]	0	[]
Take domestic flights	Exit to baggage claim.	I pack another shirt into my suitcase.	0	[]	0	[]
Take domestic flights	Take transportation.	I pack another shirt into my suitcase.	0	[]	0	[]
Throw a Football	Pick up the football with your throwing hand.	Both of my hands are grasping the ball.	0	[]	2	[('football', 'held', 'True')]
Throw a Football	Position your body in the throwing stance.	Both of my hands are grasping the ball.	0	[]	0	[]
Throw a Football	Hold the ball near your ear.	Both of my hands are grasping the ball.	0	[]	0	[]
Throw a Football	Stabilize the ball with your non-throwing hand.	Both of my hands are grasping the ball.	2	[('the ball', 'held with two hands', 'more likely')]	2	[]
Throw a Football	Release your non-throwing hand from the ball.	Both of my hands are grasping the ball.	1	[('the ball', 'held with two hands', 'less likely')]	1	[]
Throw a Football	Wind your throwing arm back.	Both of my hands are grasping the ball.	0	[]	0	[]
Throw a Football	Throw in a half-circular motion.	Both of my hands are grasping the ball.	0	[]	1	[]
Throw a Football	Pick up the football with your throwing hand.	Someone else takes the football.	1	[('football', 'grasped', 'more likely')]	0	[]
Throw a Football	Position your body in the throwing stance.	Someone else takes the football.	0	[]	0	[]
Throw a Football	Hold the ball near your ear.	Someone else takes the football.	0	[]	0	[]
Throw a Football	Stabilize the ball with your non-throwing hand.	Someone else takes the football.	0	[]	0	[]
Throw a Football	Release your non-throwing hand from the ball.	Someone else takes the football.	0	[]	0	[]
Throw a Football	Wind your throwing arm back.	Someone else takes the football.	0	[]	0	[]
Throw a Football	Throw in a half-circular motion.	Someone else takes the football.	2	[('football', 'grasped', 'less likely')]	2	[('football', 'held', 'False')]
Wash Fruit and Vegetables	Prepare produce for washing	I eat the produce and get sick.	0	[]	0	[]
Wash Fruit and Vegetables	Wash your hands	I eat the produce and get sick.	0	[]	0	[]
Wash Fruit and Vegetables	Cut away any damaged or bruised areas of your produce	I eat the produce and get sick.	1	[('produce', 'containing harmful bacteria', 'less likely')]	0	[]
Wash Fruit and Vegetables	Clean your countertop, cutting boards, and utensils.	I eat the produce and get sick.	0	[]	0	[]
Wash Fruit and Vegetables	Rinse produce with cool or cold water	I eat the produce and get sick.	1	[('produce', 'containing harmful bacteria', 'less likely')]	0	[]
Wash Fruit and Vegetables	Scrub any produce with a thick skin	I eat the produce and get sick.	1	[('produce', 'containing harmful bacteria', 'less likely')]	0	[]
Wash Fruit and Vegetables	Dry produce after washing.	I eat the produce and get sick.	0	[]	0	[]
Wash sneakers	Brush off dirt from the surface of the sneakers.	I put on the sneakers and go outside.	0	[]	0	[]
Wash sneakers	Remove shoelaces.	I put on the sneakers and go outside.	1	[('the sneakers', 'wearable', 'less likely'), ('the shoelaces', 'on the sneakers', 'less likely')]	0	[]
Wash sneakers	Rinse the shoelaces in soapy water and air dry.	I put on the sneakers and go outside.	0	[]	0	[]
Wash sneakers	Apply mild detergent to the sneakers and rub gently.	I put on the sneakers and go outside.	0	[]	0	[]
Wash sneakers	Use a wet towel to blot the sneakers.	I put on the sneakers and go outside.	0	[]	0	[]
Wash sneakers	Air dry the sneakers.	I put on the sneakers and go outside.	0	[]	0	[]
Wash sneakers	Put the shoelaces back to the sneakers.	I put on the sneakers and go outside.	2	[('the sneakers', 'wearable', 'more likely'), ('the shoelaces', 'on the sneakers', 'more likely')]	2	[('shoelaces', 'removed', 'False')]
Wash sneakers	Brush off dirt from the surface of the sneakers.	The sneakers are damp.	0	[]	0	[]
Wash sneakers	Remove shoelaces.	The sneakers are damp.	0	[]	0	[]
Wash sneakers	Rinse the shoelaces in soapy water and air dry.	The sneakers are damp.	0	[]	0	[]
Wash sneakers	Apply mild detergent to the sneakers and rub gently.	The sneakers are damp.	2	[('the sneakers', 'wet', 'more likely')]	2	[('sneakers', 'wet', 'True')]
Wash sneakers	Use a wet towel to blot the sneakers.	The sneakers are damp.	0	[]	0	[]
Wash sneakers	Air dry the sneakers.	The sneakers are damp.	1	[('the sneakers', 'wet', 'less likely')]	1	[('sneakers', 'wet', 'False')]
Wash sneakers	Put the shoelaces back to the sneakers.	The sneakers are damp.	0	[]	0	[]
Wear contact lenses	Wash your hands with fragrance-free soap and warm water.	I see things clearly.	0	[]	0	[]
Wear contact lenses	Remove the lid on one side of your contact lens case and set it aside.	I see things clearly.	0	[]	0	[]
Wear contact lenses	Use your fingertip to slide the contact lens from the case.	I see things clearly.	0	[]	0	[]
Wear contact lenses	Rinse the contact lens with your contact solution.	I see things clearly.	0	[]	0	[]
Wear contact lenses	Place the contact concave side up on your index finger.	I see things clearly.	0	[]	0	[]
Wear contact lenses	Hold your eye open with your middle finger and opposite hand, if necessary.	I see things clearly.	0	[]	0	[]
Wear contact lenses	Move the contact towards your eyes calmly and steadily.	I see things clearly.	0	[]	0	[]
Wear contact lenses	Place the contact on your iris gently and blink slowly.	I see things clearly.	2	[('the contact lenses', 'on my eyes', 'more likely'), ('the contact lens', 'on my fingertip', 'less likely')]	2	[]
Wear contact lenses	Wash your hands with fragrance-free soap and warm water.	I touch my eyes which get irritated and start watering.	1	[('my hands', 'dirty', 'less likely')]	0	[]
Wear contact lenses	Remove the lid on one side of your contact lens case and set it aside.	I touch my eyes which get irritated and start watering.	0	[]	0	[]
Wear contact lenses	Use your fingertip to slide the contact lens from the case.	I touch my eyes which get irritated and start watering.	0	[]	0	[]
Wear contact lenses	Rinse the contact lens with your contact solution.	I touch my eyes which get irritated and start watering.	0	[]	0	[]
Wear contact lenses	Place the contact concave side up on your index finger.	I touch my eyes which get irritated and start watering.	0	[]	0	[]
Wear contact lenses	Hold your eye open with your middle finger and opposite hand, if necessary.	I touch my eyes which get irritated and start watering.	0	[]	0	[]
Wear contact lenses	Move the contact towards your eyes calmly and steadily.	I touch my eyes which get irritated and start watering.	0	[]	0	[]
Wear contact lenses	Place the contact on your iris gently and blink slowly.	I touch my eyes which get irritated and start watering.	0	[]	1	[('contact_lens', 'on_eye', 'True')]
Wear contact lenses	Wash your hands with fragrance-free soap and warm water.	The contact lens irratates my eyes.	0	[]	0	[]
Wear contact lenses	Remove the lid on one side of your contact lens case and set it aside.	The contact lens irratates my eyes.	0	[]	0	[]
Wear contact lenses	Use your fingertip to slide the contact lens from the case.	The contact lens irratates my eyes.	0	[]	0	[]
Wear contact lenses	Rinse the contact lens with your contact solution.	The contact lens irratates my eyes.	1	[('contact lense', 'sanitized', 'more likely')]	0	[]
Wear contact lenses	Place the contact concave side up on your index finger.	The contact lens irratates my eyes.	0	[]	0	[]
Wear contact lenses	Hold your eye open with your middle finger and opposite hand, if necessary.	The contact lens irratates my eyes.	0	[]	0	[]
Wear contact lenses	Move the contact towards your eyes calmly and steadily.	The contact lens irratates my eyes.	0	[]	0	[]
Wear contact lenses	Place the contact on your iris gently and blink slowly.	The contact lens irratates my eyes.	0	[]	1	[]
Overall F1 Score: 0.6671837579476119
