# Supplementary material
Source: ML conference proceedings conference paper supplement (https://aclanthology.org/2023.findings-eacl.31)
Supplement: dataset [file 2023.findings-eacl.31.dataset.zip › causal_reasoning_of_entities_and_events/codex/v1.2/data_dev_out_entity_and_event_gold.json]

{
    "1": {
        "goal": "Sear a steak",
        "annotator": "Harry",
        "steps": [
            [
                {
                    "type": "step",
                    "step": "Start."
                }
            ],
            [
                {
                    "type": "step",
                    "step": "Set the steak at room temperature."
                }
            ],
            [
                {
                    "type": "step",
                    "step": "Heat the pan."
                },
                {
                    "type": "entity",
                    "entity": "the pan",
                    "attribute": "hot",
                    "change": "more likely"
                },
                {
                    "type": "event",
                    "event": "I touch the pan without getting burned.",
                    "change": "less likely"
                },
                {
                    "type": "predicted_entity",
                    "entity": "pan",
                    "attribute": "hot",
                    "change": "True"
                },
                {
                    "type": "predicted_event",
                    "event": "I touch the pan without getting burned.",
                    "change": "less likely"
                }
            ],
            [
                {
                    "type": "step",
                    "step": "Put olive oil in the pan until smoking."
                },
                {
                    "type": "entity",
                    "entity": "the pan",
                    "attribute": "greased",
                    "change": "more likely"
                },
                {
                    "type": "event",
                    "event": "A sizzling sound can be heard if I add vegetables to the pan.",
                    "change": "more likely"
                },
                {
                    "type": "predicted_entity",
                    "entity": "pan",
                    "attribute": "greased",
                    "change": "True"
                },
                {
                    "type": "predicted_event",
                    "event": "I touch the pan without getting burned.",
                    "change": "less likely"
                }
            ],
            [
                {
                    "type": "step",
                    "step": "Add the steak and sear until both sides are browned."
                },
                {
                    "type": "entity",
                    "entity": "the steak",
                    "attribute": "cooked",
                    "change": "more likely"
                },
                {
                    "type": "event",
                    "event": "I eat the steak without getting sick.",
                    "change": "more likely"
                },
                {
                    "type": "predicted_entity",
                    "entity": "steak",
                    "attribute": "cooked",
                    "change": "True"
                },
                {
                    "type": "predicted_event",
                    "event": "A sizzling sound can be heard if I add vegetables to the pan.",
                    "change": "more likely"
                }
            ],
            [
                {
                    "type": "step",
                    "step": "Place the pan in the oven until desired cookedness."
                },
                {
                    "type": "entity",
                    "entity": "the steak",
                    "attribute": "cooked",
                    "change": "more likely"
                },
                {
                    "type": "event",
                    "event": "I eat the steak without getting sick.",
                    "change": "more likely"
                },
                {
                    "type": "predicted_entity",
                    "entity": "steak",
                    "attribute": "cooked",
                    "change": "True"
                },
                {
                    "type": "predicted_event",
                    "event": "I eat the steak without getting sick.",
                    "change": "more likely"
                }
            ],
            [
                {
                    "type": "step",
                    "step": "Remove the steak from the pan and serve with sauce."
                }
            ],
            [
                {
                    "type": "step",
                    "step": "Let the pan cool and wash it."
                },
                {
                    "type": "entity",
                    "entity": "the pan",
                    "attribute": "hot",
                    "change": "less likely"
                },
                {
                    "type": "entity",
                    "entity": "the pan",
                    "attribute": "greased",
                    "change": "less likely"
                },
                {
                    "type": "event",
                    "event": "I touch the pan without getting burned.",
                    "change": "more likely"
                },
                {
                    "type": "event",
                    "event": "A sizzling sound can be heard if I add vegetables to the pan.",
                    "change": "less likely"
                },
                {
                    "type": "predicted_entity",
                    "entity": "pan",
                    "attribute": "hot",
                    "change": "False"
                },
                {
                    "type": "predicted_entity",
                    "entity": "pan",
                    "attribute": "greased",
                    "change": "False"
                },
                {
                    "type": "predicted_event",
                    "event": "I touch the pan without getting burned.",
                    "change": "more likely"
                }
            ]
        ]
    },
    "2": {
        "goal": "Do laundry with a washing machine",
        "annotator": "Harry",
        "steps": [
            [
                {
                    "type": "step",
                    "step": "Start."
                }
            ],
            [
                {
                    "type": "step",
                    "step": "Open the door of the washing machine."
                },
                {
                    "type": "predicted_entity",
                    "entity": "washing_machine_door",
                    "attribute": "open",
                    "change": "True"
                }
            ],
            [
                {
                    "type": "step",
                    "step": "Put the laundry inside the washing machine."
                },
                {
                    "type": "predicted_entity",
                    "entity": "clothes",
                    "attribute": "in_washing_machine",
                    "change": "True"
                }
            ],
            [
                {
                    "type": "step",
                    "step": "Close the door."
                },
                {
                    "type": "predicted_entity",
                    "entity": "washing_machine_door",
                    "attribute": "open",
                    "change": "False"
                }
            ],
            [
                {
                    "type": "step",
                    "step": "Add detergents to the detergent compartment."
                }
            ],
            [
                {
                    "type": "step",
                    "step": "Choose a cycle."
                }
            ],
            [
                {
                    "type": "step",
                    "step": "Press start and wait for the cycle to finish."
                },
                {
                    "type": "entity",
                    "entity": "the clothes",
                    "attribute": "wet",
                    "change": "more likely"
                },
                {
                    "type": "entity",
                    "entity": "the washing machine door",
                    "attribute": "locked",
                    "change": "more likely"
                },
                {
                    "type": "event",
                    "event": "I wear the clothes and stay dry.",
                    "change": "less likely"
                },
                {
                    "type": "event",
                    "event": "I push to open the door of the washing machine.",
                    "change": "less likely"
                },
                {
                    "type": "predicted_entity",
                    "entity": "clothes",
                    "attribute": "wet",
                    "change": "True"
                },
                {
                    "type": "predicted_entity",
                    "entity": "washing_machine_door",
                    "attribute": "locked",
                    "change": "True"
                },
                {
                    "type": "predicted_event",
                    "event": "I wear the clothes and stay dry.",
                    "change": "less likely"
                },
                {
                    "type": "predicted_event",
                    "event": "I push to open the door of the washing machine.",
                    "change": "less likely"
                }
            ],
            [
                {
                    "type": "step",
                    "step": "When the cycle ends, move the clothes to the dryer."
                },
                {
                    "type": "entity",
                    "entity": "the washing machine door",
                    "attribute": "locked",
                    "change": "less likely"
                },
                {
                    "type": "entity",
                    "entity": "the clothes",
                    "attribute": "clean",
                    "change": "more likely"
                },
                {
                    "type": "event",
                    "event": "I push to open the door of the washing machine.",
                    "change": "more likely"
                },
                {
                    "type": "predicted_entity",
                    "entity": "washing_machine_door",
                    "attribute": "locked",
                    "change": "False"
                },
                {
                    "type": "predicted_entity",
                    "entity": "clothes",
                    "attribute": "clean",
                    "change": "True"
                },
                {
                    "type": "predicted_entity",
                    "entity": "clothes",
                    "attribute": "in_washing_machine",
                    "change": "False"
                }
            ]
        ]
    },
    "3": {
        "goal": "Arrange Flowers in a Vase",
        "annotator": "Harry",
        "steps": [
            [
                {
                    "type": "step",
                    "step": "Start."
                }
            ],
            [
                {
                    "type": "step",
                    "step": "Choose the right vase."
                },
                {
                    "type": "predicted_entity",
                    "entity": "vase",
                    "attribute": "chosen",
                    "change": "True"
                }
            ],
            [
                {
                    "type": "step",
                    "step": "Use a clear elastic hair tie to gather flowers together."
                },
                {
                    "type": "event",
                    "event": "The flowers fall apart.",
                    "change": "less likely"
                },
                {
                    "type": "predicted_entity",
                    "entity": "flowers",
                    "attribute": "gathered",
                    "change": "True"
                }
            ],
            [
                {
                    "type": "step",
                    "step": "Pour fresh, cool water in your vase."
                },
                {
                    "type": "entity",
                    "entity": "the vase",
                    "attribute": "empty",
                    "change": "less likely"
                },
                {
                    "type": "predicted_entity",
                    "entity": "vase",
                    "attribute": "empty",
                    "change": "False"
                },
                {
                    "type": "predicted_event",
                    "event": "The flowers are wet.",
                    "change": "more likely"
                }
            ],
            [
                {
                    "type": "step",
                    "step": "Add a couple of drops of bleach to the water."
                },
                {
                    "type": "predicted_entity",
                    "entity": "vase",
                    "attribute": "bleach",
                    "change": "True"
                }
            ],
            [
                {
                    "type": "step",
                    "step": "Organize your flowers and trim off leaves."
                },
                {
                    "type": "predicted_entity",
                    "entity": "flowers",
                    "attribute": "organized",
                    "change": "True"
                }
            ],
            [
                {
                    "type": "step",
                    "step": "Cut the flower stems with a sharp knife or garden clippers."
                },
                {
                    "type": "predicted_entity",
                    "entity": "flowers",
                    "attribute": "cut",
                    "change": "True"
                }
            ],
            [
                {
                    "type": "step",
                    "step": "Insert the flowers into the vase"
                },
                {
                    "type": "entity",
                    "entity": "the flowers",
                    "attribute": "in the vase",
                    "change": "more likely"
                },
                {
                    "type": "event",
                    "event": "The flowers are wet.",
                    "change": "more likely"
                },
                {
                    "type": "predicted_entity",
                    "entity": "flowers",
                    "attribute": "in_vase",
                    "change": "True"
                },
                {
                    "type": "predicted_event",
                    "event": "The flowers fall apart.",
                    "change": "less likely"
                }
            ]
        ]
    },
    "4": {
        "goal": "Wash sneakers",
        "annotator": "Harry",
        "steps": [
            [
                {
                    "type": "step",
                    "step": "Start."
                }
            ],
            [
                {
                    "type": "step",
                    "step": "Brush off dirt from the surface of the sneakers."
                },
                {
                    "type": "predicted_entity",
                    "entity": "sneakers",
                    "attribute": "dirty",
                    "change": "False"
                }
            ],
            [
                {
                    "type": "step",
                    "step": "Remove shoelaces."
                },
                {
                    "type": "entity",
                    "entity": "the shoelaces",
                    "attribute": "on the sneakers",
                    "change": "less likely"
                },
                {
                    "type": "entity",
                    "entity": "the sneakers",
                    "attribute": "wearable",
                    "change": "less likely"
                },
                {
                    "type": "event",
                    "event": "I put on the sneakers and go outside.",
                    "change": "less likely"
                },
                {
                    "type": "predicted_entity",
                    "entity": "shoelaces",
                    "attribute": "on_sneakers",
                    "change": "False"
                },
                {
                    "type": "predicted_entity",
                    "entity": "sneakers",
                    "attribute": "wearable",
                    "change": "False"
                },
                {
                    "type": "predicted_event",
                    "event": "I put on the sneakers and go outside.",
                    "change": "less likely"
                }
            ],
            [
                {
                    "type": "step",
                    "step": "Rinse the shoelaces in soapy water and air dry."
                },
                {
                    "type": "predicted_entity",
                    "entity": "shoelaces",
                    "attribute": "wet",
                    "change": "False"
                }
            ],
            [
                {
                    "type": "step",
                    "step": "Apply mild detergent to the sneakers and rub gently."
                },
                {
                    "type": "entity",
                    "entity": "the sneakers",
                    "attribute": "wet",
                    "change": "more likely"
                },
                {
                    "type": "event",
                    "event": "The sneakers are damp.",
                    "change": "more likely"
                },
                {
                    "type": "predicted_entity",
                    "entity": "sneakers",
                    "attribute": "wet",
                    "change": "True"
                },
                {
                    "type": "predicted_event",
                    "event": "The sneakers are damp.",
                    "change": "more likely"
                }
            ],
            [
                {
                    "type": "step",
                    "step": "Use a wet towel to blot the sneakers. "
                },
                {
                    "type": "predicted_entity",
                    "entity": "sneakers",
                    "attribute": "wet",
                    "change": "False"
                }
            ],
            [
                {
                    "type": "step",
                    "step": "Air dry the sneakers."
                },
                {
                    "type": "entity",
                    "entity": "the sneakers",
                    "attribute": "wet",
                    "change": "less likely"
                },
                {
                    "type": "event",
                    "event": "The sneakers are damp.",
                    "change": "less likely"
                },
                {
                    "type": "predicted_entity",
                    "entity": "sneakers",
                    "attribute": "wet",
                    "change": "False"
                },
                {
                    "type": "predicted_event",
                    "event": "The sneakers are damp.",
                    "change": "less likely"
                }
            ],
            [
                {
                    "type": "step",
                    "step": "Put the shoelaces back to the sneakers."
                },
                {
                    "type": "entity",
                    "entity": "the shoelaces",
                    "attribute": "on the sneakers",
                    "change": "more likely"
                },
                {
                    "type": "entity",
                    "entity": "the sneakers",
                    "attribute": "wearable",
                    "change": "more likely"
                },
                {
                    "type": "event",
                    "event": "I put on the sneakers and go outside.",
                    "change": "more likely"
                },
                {
                    "type": "predicted_entity",
                    "entity": "shoelaces",
                    "attribute": "on_sneakers",
                    "change": "True"
                },
                {
                    "type": "predicted_entity",
                    "entity": "sneakers",
                    "attribute": "wearable",
                    "change": "True"
                },
                {
                    "type": "predicted_event",
                    "event": "I put on the sneakers and go outside.",
                    "change": "more likely"
                }
            ]
        ]
    },
    "5": {
        "goal": "Steam broccoli",
        "annotator": "Harry",
        "steps": [
            [
                {
                    "type": "step",
                    "step": "Start."
                }
            ],
            [
                {
                    "type": "step",
                    "step": "Clean the broccoli."
                },
                {
                    "type": "predicted_entity",
                    "entity": "broccoli",
                    "attribute": "clean",
                    "change": "True"
                }
            ],
            [
                {
                    "type": "step",
                    "step": "Trim the stem and cut the florets."
                },
                {
                    "type": "predicted_entity",
                    "entity": "broccoli",
                    "attribute": "cut",
                    "change": "True"
                }
            ],
            [
                {
                    "type": "step",
                    "step": "Place a steamer basket in a saucepan."
                }
            ],
            [
                {
                    "type": "step",
                    "step": "Place the broccoli in the steamer basket."
                }
            ],
            [
                {
                    "type": "step",
                    "step": "Steam the broccoli."
                },
                {
                    "type": "entity",
                    "entity": "the broccoli",
                    "attribute": "cooked",
                    "change": "more likely"
                },
                {
                    "type": "entity",
                    "entity": "the broccoli",
                    "attribute": "hot",
                    "change": "more likely"
                },
                {
                    "type": "event",
                    "event": "I eat the broccoli and my mouth burns.",
                    "change": "more likely"
                },
                {
                    "type": "predicted_entity",
                    "entity": "broccoli",
                    "attribute": "cooked",
                    "change": "True"
                },
                {
                    "type": "predicted_entity",
                    "entity": "broccoli",
                    "attribute": "hot",
                    "change": "True"
                },
                {
                    "type": "predicted_event",
                    "event": "I eat the broccoli and my mouth burns.",
                    "change": "more likely"
                }
            ],
            [
                {
                    "type": "step",
                    "step": "Remove it from heat."
                },
                {
                    "type": "predicted_entity",
                    "entity": "broccoli",
                    "attribute": "hot",
                    "change": "False"
                },
                {
                    "type": "predicted_event",
                    "event": "I eat the broccoli and my mouth burns.",
                    "change": "less likely"
                }
            ],
            [
                {
                    "type": "step",
                    "step": "Serve."
                }
            ]
        ]
    },
    "6": {
        "goal": "Order food delivery with an app",
        "annotator": "Harry",
        "steps": [
            [
                {
                    "type": "step",
                    "step": "Start."
                }
            ],
            [
                {
                    "type": "step",
                    "step": "Choose a restaurant."
                },
                {
                    "type": "predicted_event",
                    "event": "The restaurant knows what food to prepare for me.",
                    "change": "more likely"
                }
            ],
            [
                {
                    "type": "step",
                    "step": "Add the dishes that you want to order to the shopping cart."
                },
                {
                    "type": "predicted_event",
                    "event": "The restaurant knows what food to prepare for me.",
                    "change": "more likely"
                }
            ],
            [
                {
                    "type": "step",
                    "step": "Verify your delivery address and instructions."
                },
                {
                    "type": "predicted_event",
                    "event": "The restaurant knows what food to prepare for me.",
                    "change": "more likely"
                }
            ],
            [
                {
                    "type": "step",
                    "step": "Pay."
                },
                {
                    "type": "entity",
                    "entity": "the order",
                    "attribute": "placed",
                    "change": "more likely"
                },
                {
                    "type": "event",
                    "event": "The restaurant knows what food to prepare for me.",
                    "change": "more likely"
                },
                {
                    "type": "predicted_entity",
                    "entity": "order",
                    "attribute": "placed",
                    "change": "True"
                },
                {
                    "type": "predicted_event",
                    "event": "The restaurant knows what food to prepare for me.",
                    "change": "more likely"
                }
            ],
            [
                {
                    "type": "step",
                    "step": "Track delivery status and call the driver if needed."
                },
                {
                    "type": "predicted_entity",
                    "entity": "order",
                    "attribute": "delivered",
                    "change": "True"
                },
                {
                    "type": "predicted_event",
                    "event": "I start eating the food I ordered.",
                    "change": "more likely"
                }
            ],
            [
                {
                    "type": "step",
                    "step": "Pick up the food and enjoy. "
                },
                {
                    "type": "entity",
                    "entity": "the food",
                    "attribute": "received",
                    "change": "more likely"
                },
                {
                    "type": "event",
                    "event": "I start eating the food I ordered.",
                    "change": "more likely"
                },
                {
                    "type": "predicted_entity",
                    "entity": "food",
                    "attribute": "received",
                    "change": "True"
                },
                {
                    "type": "predicted_event",
                    "event": "I start eating the food I ordered.",
                    "change": "more likely"
                }
            ]
        ]
    },
    "7": {
        "goal": "Take domestic flights",
        "annotator": "Harry",
        "steps": [
            [
                {
                    "type": "step",
                    "step": "Start."
                }
            ],
            [
                {
                    "type": "step",
                    "step": "Book a flight."
                },
                {
                    "type": "entity",
                    "entity": "your ticket",
                    "attribute": "purchased",
                    "change": "more likely"
                },
                {
                    "type": "event",
                    "event": "I have a ticket number for the flight.",
                    "change": "more likely"
                },
                {
                    "type": "predicted_entity",
                    "entity": "your_ticket",
                    "attribute": "purchased",
                    "change": "True"
                },
                {
                    "type": "predicted_event",
                    "event": "I have a ticket number for the flight.",
                    "change": "more likely"
                }
            ],
            [
                {
                    "type": "step",
                    "step": "Arrive at the airport at least 1 hour prior to boarding."
                },
                {
                    "type": "entity",
                    "entity": "I",
                    "attribute": "at the airport",
                    "change": "more likely"
                },
                {
                    "type": "event",
                    "event": "I pack another shirt into my suitcase.",
                    "change": "less likely"
                },
                {
                    "type": "predicted_entity",
                    "entity": "I",
                    "attribute": "at_airport",
                    "change": "True"
                }
            ],
            [
                {
                    "type": "step",
                    "step": "Check in using the airline app or at the counter."
                },
                {
                    "type": "event",
                    "event": "I have my boarding pass ready.",
                    "change": "more likely"
                },
                {
                    "type": "predicted_entity",
                    "entity": "your_ticket",
                    "attribute": "checked_in",
                    "change": "True"
                },
                {
                    "type": "predicted_event",
                    "event": "I have my boarding pass ready.",
                    "change": "more likely"
                }
            ],
            [
                {
                    "type": "step",
                    "step": "Check bags if any."
                }
            ],
            [
                {
                    "type": "step",
                    "step": "Go through airport security."
                }
            ],
            [
                {
                    "type": "step",
                    "step": "Wait at the boarding gate or walk around in the terminal."
                }
            ],
            [
                {
                    "type": "step",
                    "step": "Board the plane when your group is called."
                }
            ],
            [
                {
                    "type": "step",
                    "step": "Sit through the flight after take-off."
                },
                {
                    "type": "entity",
                    "entity": "I",
                    "attribute": "at the airport",
                    "change": "less likely"
                },
                {
                    "type": "entity",
                    "entity": "I",
                    "attribute": "in the air",
                    "change": "more likely"
                },
                {
                    "type": "event",
                    "event": "I make a phone call.",
                    "change": "less likely"
                },
                {
                    "type": "predicted_entity",
                    "entity": "I",
                    "attribute": "at_airport",
                    "change": "False"
                },
                {
                    "type": "predicted_entity",
                    "entity": "I",
                    "attribute": "in_air",
                    "change": "True"
                }
            ],
            [
                {
                    "type": "step",
                    "step": "After the plane lands, exit the plane with all carry-on items."
                },
                {
                    "type": "entity",
                    "entity": "I",
                    "attribute": "at the airport",
                    "change": "more likely"
                },
                {
                    "type": "entity",
                    "entity": "I",
                    "attribute": "in the air",
                    "change": "less likely"
                },
                {
                    "type": "event",
                    "event": "I make a phone call.",
                    "change": "more likely"
                },
                {
                    "type": "predicted_entity",
                    "entity": "I",
                    "attribute": "at_airport",
                    "change": "True"
                },
                {
                    "type": "predicted_entity",
                    "entity": "I",
                    "attribute": "in_air",
                    "change": "False"
                }
            ],
            [
                {
                    "type": "step",
                    "step": "Exit to baggage claim."
                }
            ],
            [
                {
                    "type": "step",
                    "step": "Take transportation."
                },
                {
                    "type": "entity",
                    "entity": "I",
                    "attribute": "at the airport",
                    "change": "less likely"
                },
                {
                    "type": "predicted_entity",
                    "entity": "I",
                    "attribute": "at_airport",
                    "change": "False"
                }
            ]
        ]
    },
    "8": {
        "goal": "Stay at a hotel",
        "annotator": "Harry",
        "steps": [
            [
                {
                    "type": "step",
                    "step": "Start."
                }
            ],
            [
                {
                    "type": "step",
                    "step": "Find a suitable hotel online."
                }
            ],
            [
                {
                    "type": "step",
                    "step": "Book a reservation by using the hotel website or calling the hotel."
                },
                {
                    "type": "entity",
                    "entity": "hotel room",
                    "attribute": "booked",
                    "change": "more likely"
                },
                {
                    "type": "event",
                    "event": "The hotel knows when I\u2019m arriving.",
                    "change": "more likely"
                },
                {
                    "type": "predicted_entity",
                    "entity": "hotel_room",
                    "attribute": "booked",
                    "change": "True"
                },
                {
                    "type": "predicted_event",
                    "event": "The hotel knows when I\u2019m arriving.",
                    "change": "more likely"
                }
            ],
            [
                {
                    "type": "step",
                    "step": "Arrive at the hotel."
                }
            ],
            [
                {
                    "type": "step",
                    "step": "Check in at the front desk and receive your room key."
                },
                {
                    "type": "entity",
                    "entity": "I",
                    "attribute": "checked in to the hotel",
                    "change": "more likely"
                },
                {
                    "type": "event",
                    "event": "I have a hotel room key.",
                    "change": "more likely"
                },
                {
                    "type": "predicted_entity",
                    "entity": "I",
                    "attribute": "checked_in_to_hotel",
                    "change": "True"
                },
                {
                    "type": "predicted_event",
                    "event": "I have a hotel room key.",
                    "change": "more likely"
                }
            ],
            [
                {
                    "type": "step",
                    "step": "Arrive at the room."
                }
            ],
            [
                {
                    "type": "step",
                    "step": "Order in-room dining and use the hotel's amenities such as gym and spa."
                }
            ],
            [
                {
                    "type": "step",
                    "step": "Check out from the hotel."
                },
                {
                    "type": "entity",
                    "entity": "you",
                    "attribute": "staying in the hotel",
                    "change": "less likely"
                },
                {
                    "type": "event",
                    "event": "I have a hotel room key.",
                    "change": "less likely"
                },
                {
                    "type": "predicted_entity",
                    "entity": "you",
                    "attribute": "staying_in_hotel",
                    "change": "False"
                },
                {
                    "type": "predicted_event",
                    "event": "The hotel knows when I\u2019m arriving.",
                    "change": "less likely"
                }
            ]
        ]
    },
    "9": {
        "goal": "Project computer screen with an HDMI cable",
        "annotator": "Harry",
        "steps": [
            [
                {
                    "type": "step",
                    "step": "Start."
                }
            ],
            [
                {
                    "type": "step",
                    "step": "Turn on the computer."
                },
                {
                    "type": "entity",
                    "entity": "computer",
                    "attribute": "powered on",
                    "change": "more likely"
                },
                {
                    "type": "event",
                    "event": "I adjust the display settings of the computer.",
                    "change": "more likely"
                },
                {
                    "type": "predicted_entity",
                    "entity": "computer",
                    "attribute": "powered_on",
                    "change": "True"
                },
                {
                    "type": "predicted_event",
                    "event": "I adjust the display settings of the computer.",
                    "change": "more likely"
                }
            ],
            [
                {
                    "type": "step",
                    "step": "Turn on the monitor."
                },
                {
                    "type": "entity",
                    "entity": "monitor",
                    "attribute": "powered on",
                    "change": "more likely"
                },
                {
                    "type": "event",
                    "event": "I adjust the display settings of the monitor.",
                    "change": "more likely"
                },
                {
                    "type": "predicted_entity",
                    "entity": "monitor",
                    "attribute": "powered_on",
                    "change": "True"
                },
                {
                    "type": "predicted_event",
                    "event": "I adjust the display settings of the monitor.",
                    "change": "more likely"
                }
            ],
            [
                {
                    "type": "step",
                    "step": "Select the correct source of the monitor."
                }
            ],
            [
                {
                    "type": "step",
                    "step": "Connect the computer and the monitor with an HDMI cable."
                },
                {
                    "type": "entity",
                    "entity": "HDMI cable",
                    "attribute": "connected in both ends",
                    "change": "more likely"
                },
                {
                    "type": "event",
                    "event": "The monitor projects images from the computer.",
                    "change": "more likely"
                },
                {
                    "type": "predicted_entity",
                    "entity": "HDMI_cable",
                    "attribute": "connected_in_both_ends",
                    "change": "True"
                },
                {
                    "type": "predicted_event",
                    "event": "The monitor projects images from the computer.",
                    "change": "more likely"
                }
            ],
            [
                {
                    "type": "step",
                    "step": "Adjust the projection settings on the computer."
                }
            ]
        ]
    },
    "10": {
        "goal": "Start a YouTube channel",
        "annotator": "Harry",
        "steps": [
            [
                {
                    "type": "step",
                    "step": "Start."
                }
            ],
            [
                {
                    "type": "step",
                    "step": "Decide on a theme and be prepared to stick to it in the long run."
                },
                {
                    "type": "predicted_entity",
                    "entity": "channel",
                    "attribute": "theme",
                    "change": "True"
                }
            ],
            [
                {
                    "type": "step",
                    "step": "Come up with a channel name."
                },
                {
                    "type": "predicted_entity",
                    "entity": "channel",
                    "attribute": "name",
                    "change": "True"
                }
            ],
            [
                {
                    "type": "step",
                    "step": "Register a Google account if you don't have one."
                },
                {
                    "type": "predicted_entity",
                    "entity": "your_channel",
                    "attribute": "google_account",
                    "change": "True"
                }
            ],
            [
                {
                    "type": "step",
                    "step": "Create your YouTube channel with your Google account. "
                },
                {
                    "type": "entity",
                    "entity": "the channel",
                    "attribute": "accessible",
                    "change": "more likely"
                },
                {
                    "type": "event",
                    "event": "Someone finds my video using a URL.",
                    "change": "more likely"
                },
                {
                    "type": "predicted_entity",
                    "entity": "channel",
                    "attribute": "accessible",
                    "change": "True"
                },
                {
                    "type": "predicted_event",
                    "event": "Someone finds my video using a URL.",
                    "change": "more likely"
                }
            ],
            [
                {
                    "type": "step",
                    "step": "Procure a banner art and add it to your main page."
                },
                {
                    "type": "predicted_entity",
                    "entity": "channel",
                    "attribute": "banner",
                    "change": "True"
                }
            ],
            [
                {
                    "type": "step",
                    "step": "Upload your first video."
                },
                {
                    "type": "entity",
                    "entity": "your channel",
                    "attribute": "have a video",
                    "change": "more likely"
                },
                {
                    "type": "event",
                    "event": "Someone watches a video from my channel.",
                    "change": "more likely"
                },
                {
                    "type": "predicted_entity",
                    "entity": "your_channel",
                    "attribute": "have_video",
                    "change": "True"
                },
                {
                    "type": "predicted_event",
                    "event": "Someone watches a video from my channel.",
                    "change": "more likely"
                }
            ],
            [
                {
                    "type": "step",
                    "step": "Interact with comments."
                }
            ],
            [
                {
                    "type": "step",
                    "step": "Track statistics in the Creator Studio."
                }
            ]
        ]
    },
    "11": {
        "goal": "Make tea with tea bags",
        "annotator": "Harry",
        "steps": [
            [
                {
                    "step": "Start."
                }
            ],
            [
                {
                    "type": "step",
                    "step": "Heat water to a boil with an electric kettle."
                },
                {
                    "type": "entity",
                    "entity": "water",
                    "attribute": "boiling",
                    "change": "more likely"
                },
                {
                    "type": "event",
                    "event": "There is a sound coming from the kettle.",
                    "change": "more likely"
                },
                {
                    "type": "predicted_entity",
                    "entity": "water",
                    "attribute": "boiling",
                    "change": "True"
                },
                {
                    "type": "predicted_event",
                    "event": "There is a sound coming from the kettle.",
                    "change": "more likely"
                }
            ],
            [
                {
                    "type": "step",
                    "step": "Place the tea bag in a mug."
                },
                {
                    "type": "predicted_entity",
                    "entity": "tea_bag",
                    "attribute": "in_mug",
                    "change": "True"
                },
                {
                    "type": "predicted_event",
                    "event": "I put the tea bag back to its box.",
                    "change": "less likely"
                }
            ],
            [
                {
                    "type": "step",
                    "step": "Carefully pour the boiling water to the mug."
                },
                {
                    "type": "entity",
                    "entity": "water",
                    "attribute": "boiling",
                    "change": "less likely"
                },
                {
                    "type": "event",
                    "event": "There is a sound coming from the kettle.",
                    "change": "less likely"
                },
                {
                    "type": "entity",
                    "entity": "the tea bag",
                    "attribute": "wet",
                    "change": "more likely"
                },
                {
                    "type": "event",
                    "event": "I put the tea bag back to its box.",
                    "change": "less likely"
                },
                {
                    "type": "entity",
                    "entity": "the mug",
                    "attribute": "containing hot water",
                    "change": "more likely"
                },
                {
                    "type": "event",
                    "event": "It is dangerous if the mug is knocked over.",
                    "change": "more likely"
                },
                {
                    "type": "entity",
                    "entity": "the water",
                    "attribute": "transparent",
                    "change": "less likely"
                },
                {
                    "type": "event",
                    "event": "The water has a taste of tea.",
                    "change": "more likely"
                },
                {
                    "type": "predicted_entity",
                    "entity": "water",
                    "attribute": "boiling",
                    "change": "False"
                },
                {
                    "type": "predicted_entity",
                    "entity": "tea_bag",
                    "attribute": "wet",
                    "change": "True"
                },
                {
                    "type": "predicted_entity",
                    "entity": "mug",
                    "attribute": "containing_hot_water",
                    "change": "True"
                },
                {
                    "type": "predicted_entity",
                    "entity": "water",
                    "attribute": "transparent",
                    "change": "False"
                },
                {
                    "type": "predicted_event",
                    "event": "It is dangerous if the mug is knocked over.",
                    "change": "more likely"
                },
                {
                    "type": "predicted_event",
                    "event": "The water has a taste of tea.",
                    "change": "more likely"
                }
            ],
            [
                {
                    "type": "step",
                    "step": "Drink the hot tea carefully."
                },
                {
                    "type": "predicted_entity",
                    "entity": "tea_bag",
                    "attribute": "wet",
                    "change": "False"
                },
                {
                    "type": "predicted_entity",
                    "entity": "mug",
                    "attribute": "containing_hot_water",
                    "change": "False"
                },
                {
                    "type": "predicted_entity",
                    "entity": "water",
                    "attribute": "transparent",
                    "change": "True"
                }
            ]
        ]
    },
    "12": {
        "goal": "Install a game on PS5",
        "annotator": "Harry",
        "steps": [
            [
                {
                    "step": "Start."
                }
            ],
            [
                {
                    "type": "step",
                    "step": "Go to the Playstation store"
                }
            ],
            [
                {
                    "type": "step",
                    "step": "Pick a game you like"
                }
            ],
            [
                {
                    "type": "step",
                    "step": "Add the game to the cart and provide payment information"
                }
            ],
            [
                {
                    "type": "step",
                    "step": "Finish the purchase."
                },
                {
                    "type": "entity",
                    "entity": "game",
                    "attribute": "bought",
                    "change": "more likely"
                },
                {
                    "type": "event",
                    "event": "I can download and play the game.",
                    "change": "more likely"
                },
                {
                    "type": "predicted_entity",
                    "entity": "game",
                    "attribute": "bought",
                    "change": "True"
                },
                {
                    "type": "predicted_event",
                    "event": "I can download and play the game.",
                    "change": "more likely"
                }
            ],
            [
                {
                    "type": "step",
                    "step": "Download and launch the game to start playing. "
                },
                {
                    "type": "entity",
                    "entity": "the game",
                    "attribute": "installed",
                    "change": "more likely"
                },
                {
                    "type": "event",
                    "event": "I run the game.",
                    "change": "more likely"
                },
                {
                    "type": "predicted_entity",
                    "entity": "game",
                    "attribute": "installed",
                    "change": "True"
                },
                {
                    "type": "predicted_event",
                    "event": "I run the game.",
                    "change": "more likely"
                }
            ]
        ]
    },
    "13": {
        "goal": "Schedule a virtual meeting",
        "annotator": "Harry",
        "steps": [
            [
                {
                    "step": "Start."
                }
            ],
            [
                {
                    "type": "step",
                    "step": "Decide on a topic and a list of meeting attendees."
                }
            ],
            [
                {
                    "type": "step",
                    "step": "Reach out to the attendees to find a time that works."
                },
                {
                    "type": "entity",
                    "entity": "the attendees",
                    "attribute": "been notified of the meeting",
                    "change": "more likely"
                },
                {
                    "type": "event",
                    "event": "I expect that some people will show up.",
                    "change": "more likely"
                },
                {
                    "type": "predicted_entity",
                    "entity": "attendees",
                    "attribute": "been_notified_of_meeting",
                    "change": "True"
                },
                {
                    "type": "predicted_event",
                    "event": "I expect that some people will show up.",
                    "change": "more likely"
                }
            ],
            [
                {
                    "type": "step",
                    "step": "Choose a virtual meeting application such as Zoom and schedule a meeting."
                },
                {
                    "type": "predicted_entity",
                    "entity": "meeting",
                    "attribute": "scheduled",
                    "change": "True"
                }
            ],
            [
                {
                    "type": "step",
                    "step": "Send the meeting information to everyone."
                },
                {
                    "type": "predicted_entity",
                    "entity": "attendees",
                    "attribute": "been_notified_of_meeting",
                    "change": "True"
                }
            ],
            [
                {
                    "type": "step",
                    "step": "Send a reminder before the meeting."
                },
                {
                    "type": "predicted_entity",
                    "entity": "attendees",
                    "attribute": "been_notified_of_meeting",
                    "change": "True"
                }
            ],
            [
                {
                    "type": "step",
                    "step": "Start meeting."
                },
                {
                    "type": "entity",
                    "entity": "the meeting",
                    "attribute": "started",
                    "change": "more likely"
                },
                {
                    "type": "event",
                    "event": "I cancel the meeting.",
                    "change": "less likely"
                },
                {
                    "type": "predicted_entity",
                    "entity": "meeting",
                    "attribute": "started",
                    "change": "True"
                }
            ]
        ]
    },
    "14": {
        "goal": "Make scrambled eggs",
        "annotator": "Harry",
        "steps": [
            [
                {
                    "step": "Start."
                }
            ],
            [
                {
                    "type": "step",
                    "step": "Pre-heat the pan with medium to high heat."
                },
                {
                    "type": "entity",
                    "entity": "the pan",
                    "attribute": "hot",
                    "change": "more likely"
                },
                {
                    "type": "event",
                    "event": "I touch the pan surface and get injured.",
                    "change": "more likely"
                },
                {
                    "type": "predicted_entity",
                    "entity": "pan",
                    "attribute": "hot",
                    "change": "True"
                },
                {
                    "type": "predicted_event",
                    "event": "I touch the pan surface and get injured.",
                    "change": "more likely"
                }
            ],
            [
                {
                    "type": "step",
                    "step": "Crack some eggs into a mixing bowl."
                },
                {
                    "type": "predicted_entity",
                    "entity": "eggs",
                    "attribute": "cracked",
                    "change": "True"
                }
            ],
            [
                {
                    "type": "step",
                    "step": "Whisk the eggs until the mixture has a consistent color. "
                },
                {
                    "type": "predicted_entity",
                    "entity": "eggs",
                    "attribute": "mixed",
                    "change": "True"
                }
            ],
            [
                {
                    "type": "step",
                    "step": "Add oil to the pan."
                },
                {
                    "type": "entity",
                    "entity": "the pan",
                    "attribute": "clean",
                    "change": "less likely"
                },
                {
                    "type": "event",
                    "event": "My hands get greasy if I touch the pan.",
                    "change": "more likely"
                },
                {
                    "type": "predicted_entity",
                    "entity": "pan",
                    "attribute": "clean",
                    "change": "False"
                },
                {
                    "type": "predicted_event",
                    "event": "My hands get greasy if I touch the pan.",
                    "change": "more likely"
                }
            ],
            [
                {
                    "type": "step",
                    "step": "Add the eggs to the pan."
                },
                {
                    "type": "entity",
                    "entity": "the eggs",
                    "attribute": "in the hot pan",
                    "change": "more likely"
                },
                {
                    "type": "event",
                    "event": "The eggs solidify.",
                    "change": "more likely"
                },
                {
                    "type": "predicted_entity",
                    "entity": "eggs",
                    "attribute": "in_hot_pan",
                    "change": "True"
                },
                {
                    "type": "predicted_event",
                    "event": "The eggs solidify.",
                    "change": "more likely"
                }
            ],
            [
                {
                    "type": "step",
                    "step": "Stir gently and frequently to separate the eggs."
                },
                {
                    "type": "event",
                    "event": "The eggs solidify.",
                    "change": "more likely"
                },
                {
                    "type": "predicted_entity",
                    "entity": "eggs",
                    "attribute": "separated",
                    "change": "True"
                }
            ],
            [
                {
                    "type": "step",
                    "step": "Turn off the heat and serve the eggs."
                },
                {
                    "type": "entity",
                    "entity": "the eggs",
                    "attribute": "in the pan",
                    "change": "less likely"
                },
                {
                    "type": "event",
                    "event": "I start eating the eggs.",
                    "change": "more likely"
                },
                {
                    "type": "predicted_entity",
                    "entity": "eggs",
                    "attribute": "in_pan",
                    "change": "False"
                },
                {
                    "type": "predicted_entity",
                    "entity": "pan",
                    "attribute": "hot",
                    "change": "False"
                },
                {
                    "type": "predicted_event",
                    "event": "I touch the pan surface and get injured.",
                    "change": "less likely"
                },
                {
                    "type": "predicted_event",
                    "event": "I start eating the eggs.",
                    "change": "more likely"
                }
            ]
        ]
    },
    "15": {
        "goal": "Eat at a restaurant in the US",
        "annotator": "Harry",
        "steps": [
            [
                {
                    "step": "Start"
                }
            ],
            [
                {
                    "type": "step",
                    "step": "Arrive at the resturant."
                }
            ],
            [
                {
                    "type": "step",
                    "step": "Let the host know the size of your party and follow them to the table."
                }
            ],
            [
                {
                    "type": "step",
                    "step": "Order food and drinks."
                },
                {
                    "type": "entity",
                    "entity": "order",
                    "attribute": "placed",
                    "change": "more likely"
                },
                {
                    "type": "event",
                    "event": "I go home.",
                    "change": "less likely"
                },
                {
                    "type": "predicted_entity",
                    "entity": "order",
                    "attribute": "placed",
                    "change": "True"
                }
            ],
            [
                {
                    "type": "step",
                    "step": "Enjoy the food brought to the table."
                },
                {
                    "type": "entity",
                    "entity": "food",
                    "attribute": "on the table",
                    "change": "more likely"
                },
                {
                    "type": "event",
                    "event": "I eat.",
                    "change": "more likely"
                },
                {
                    "type": "predicted_entity",
                    "entity": "food",
                    "attribute": "on_table",
                    "change": "True"
                },
                {
                    "type": "predicted_event",
                    "event": "I eat.",
                    "change": "more likely"
                }
            ],
            [
                {
                    "type": "step",
                    "step": "Ask for the check when you're finished."
                },
                {
                    "type": "event",
                    "event": "I eat.",
                    "change": "less likely"
                },
                {
                    "type": "predicted_entity",
                    "entity": "check",
                    "attribute": "requested",
                    "change": "True"
                }
            ],
            [
                {
                    "type": "step",
                    "step": "Have the waiter clear off the table. "
                },
                {
                    "type": "entity",
                    "entity": "food",
                    "attribute": "on the table",
                    "change": "less likely"
                },
                {
                    "type": "event",
                    "event": "I eat.",
                    "change": "less likely"
                },
                {
                    "type": "predicted_entity",
                    "entity": "food",
                    "attribute": "on_table",
                    "change": "False"
                }
            ],
            [
                {
                    "type": "step",
                    "step": "Pay by cash or credit card."
                },
                {
                    "type": "entity",
                    "entity": "the check",
                    "attribute": "paid",
                    "change": "more likely"
                },
                {
                    "type": "event",
                    "event": "I go home.",
                    "change": "more likely"
                },
                {
                    "type": "predicted_entity",
                    "entity": "check",
                    "attribute": "paid",
                    "change": "True"
                }
            ],
            [
                {
                    "type": "step",
                    "step": "Leave the restaurant."
                },
                {
                    "type": "predicted_event",
                    "event": "I go home.",
                    "change": "more likely"
                }
            ]
        ]
    },
    "16": {
        "goal": "Wash Fruit and Vegetables",
        "annotator": "Shuyan",
        "steps": [
            [
                {
                    "step": "Start"
                }
            ],
            [
                {
                    "type": "step",
                    "step": "Prepare produce for washing"
                }
            ],
            [
                {
                    "type": "step",
                    "step": "Wash your hands"
                }
            ],
            [
                {
                    "type": "step",
                    "step": "Cut away any damaged or bruised areas of your produce"
                },
                {
                    "type": "entity",
                    "entity": "produce",
                    "attribute": "containing harmful bacteria",
                    "change": "less likely"
                },
                {
                    "type": "event",
                    "event": "I eat the produce and get sick.",
                    "change": "less likely"
                },
                {
                    "type": "predicted_entity",
                    "entity": "produce",
                    "attribute": "containing_harmful_bacteria",
                    "change": "False"
                },
                {
                    "type": "predicted_event",
                    "event": "I eat the produce and get sick.",
                    "change": "less likely"
                }
            ],
            [
                {
                    "type": "step",
                    "step": "Clean your countertop, cutting boards, and utensils."
                }
            ],
            [
                {
                    "type": "step",
                    "step": "Rinse produce with cool or cold water"
                },
                {
                    "type": "entity",
                    "entity": "produce",
                    "attribute": "containing harmful bacteria",
                    "change": "less likely"
                },
                {
                    "type": "event",
                    "event": "I eat the produce and get sick.",
                    "change": "less likely"
                },
                {
                    "type": "predicted_entity",
                    "entity": "produce",
                    "attribute": "containing_harmful_bacteria",
                    "change": "False"
                },
                {
                    "type": "predicted_event",
                    "event": "I eat the produce and get sick.",
                    "change": "less likely"
                }
            ],
            [
                {
                    "type": "step",
                    "step": "Scrub any produce with a thick skin"
                },
                {
                    "type": "entity",
                    "entity": "produce",
                    "attribute": "containing harmful bacteria",
                    "change": "less likely"
                },
                {
                    "type": "event",
                    "event": "I eat the produce and get sick.",
                    "change": "less likely"
                },
                {
                    "type": "predicted_entity",
                    "entity": "produce",
                    "attribute": "containing_harmful_bacteria",
                    "change": "False"
                },
                {
                    "type": "predicted_event",
                    "event": "I eat the produce and get sick.",
                    "change": "less likely"
                }
            ],
            [
                {
                    "type": "step",
                    "step": "Dry produce after washing."
                }
            ]
        ]
    },
    "18": {
        "goal": "Store Sweet Potato Pie",
        "annotator": "Shuyan",
        "steps": [
            [
                {
                    "step": "Start"
                }
            ],
            [
                {
                    "type": "step",
                    "step": "Let the pie cool completely on a wire rack."
                },
                {
                    "type": "predicted_entity",
                    "entity": "pie",
                    "attribute": "hot",
                    "change": "False"
                }
            ],
            [
                {
                    "type": "step",
                    "step": "Wrap the pie pan in plastic wrap to make it air-tight."
                },
                {
                    "type": "entity",
                    "entity": "pie",
                    "attribute": "wrapped",
                    "change": "more likely"
                },
                {
                    "type": "event",
                    "event": "I eat the pie",
                    "change": "less likely"
                },
                {
                    "type": "predicted_entity",
                    "entity": "pie",
                    "attribute": "wrapped",
                    "change": "True"
                }
            ],
            [
                {
                    "type": "step",
                    "step": "Put a layer of foil around the outside of the pie pan."
                },
                {
                    "type": "predicted_entity",
                    "entity": "pie",
                    "attribute": "wrapped",
                    "change": "True"
                }
            ],
            [
                {
                    "type": "step",
                    "step": "Keep the pie in the freezer for up to 1 month"
                },
                {
                    "type": "entity",
                    "entity": "the pie",
                    "attribute": "frozen",
                    "change": "more likely"
                },
                {
                    "type": "event",
                    "event": "The pie is rock hard.",
                    "change": "more likely"
                },
                {
                    "type": "predicted_entity",
                    "entity": "pie",
                    "attribute": "frozen",
                    "change": "True"
                },
                {
                    "type": "predicted_event",
                    "event": "I eat the pie",
                    "change": "less likely"
                },
                {
                    "type": "predicted_event",
                    "event": "The pie is rock hard.",
                    "change": "more likely"
                }
            ]
        ]
    },
    "19": {
        "goal": "Store Fresh Mushrooms",
        "annotator": "Shuyan",
        "steps": [
            [
                {
                    "step": "Start"
                }
            ],
            [
                {
                    "type": "step",
                    "step": "Clean the mushrooms first"
                },
                {
                    "type": "entity",
                    "entity": "the mushrooms",
                    "attribute": "clean",
                    "change": "more likely"
                },
                {
                    "type": "predicted_entity",
                    "entity": "mushrooms",
                    "attribute": "clean",
                    "change": "True"
                }
            ],
            [
                {
                    "type": "step",
                    "step": "Brush with towel or mushroom brush"
                },
                {
                    "type": "entity",
                    "entity": "the mushrooms",
                    "attribute": "clean",
                    "change": "more likely"
                },
                {
                    "type": "predicted_entity",
                    "entity": "mushrooms",
                    "attribute": "clean",
                    "change": "True"
                }
            ],
            [
                {
                    "type": "step",
                    "step": "Slice and saute the mushrooms."
                },
                {
                    "type": "entity",
                    "entity": "the mushrooms",
                    "attribute": "hot",
                    "change": "more likely"
                },
                {
                    "type": "entity",
                    "entity": "the mushroom",
                    "attribute": "cooked",
                    "change": "more likely"
                },
                {
                    "type": "event",
                    "event": "I eat the mushrooms safely.",
                    "change": "more likely"
                },
                {
                    "type": "predicted_entity",
                    "entity": "mushrooms",
                    "attribute": "hot",
                    "change": "True"
                },
                {
                    "type": "predicted_entity",
                    "entity": "mushroom",
                    "attribute": "cooked",
                    "change": "True"
                }
            ],
            [
                {
                    "type": "step",
                    "step": "Let the mushrooms cool"
                },
                {
                    "type": "entity",
                    "entity": "the mushrooms",
                    "attribute": "hot",
                    "change": "less likely"
                },
                {
                    "type": "predicted_entity",
                    "entity": "mushrooms",
                    "attribute": "hot",
                    "change": "False"
                }
            ],
            [
                {
                    "type": "step",
                    "step": "Freeze in plastic resealable bags"
                },
                {
                    "type": "entity",
                    "entity": "the mushroom",
                    "attribute": "frozen",
                    "change": "more likely"
                },
                {
                    "type": "event",
                    "event": "I eat the mushrooms.",
                    "change": "less likely"
                },
                {
                    "type": "predicted_entity",
                    "entity": "mushroom",
                    "attribute": "frozen",
                    "change": "True"
                },
                {
                    "type": "predicted_event",
                    "event": "I eat the mushrooms safely.",
                    "change": "more likely"
                }
            ]
        ]
    },
    "21": {
        "goal": "Grind coffee beans",
        "annotator": "Shuyan",
        "steps": [
            [
                {
                    "step": "Start."
                }
            ],
            [
                {
                    "type": "step",
                    "step": "Prepare a sealed jar"
                },
                {
                    "type": "predicted_entity",
                    "entity": "jar",
                    "attribute": "sealed",
                    "change": "True"
                },
                {
                    "type": "predicted_event",
                    "event": "I remove all contents from the jar.",
                    "change": "less likely"
                }
            ],
            [
                {
                    "type": "step",
                    "step": "Open the lid of the jar"
                },
                {
                    "type": "entity",
                    "entity": "the jar",
                    "attribute": "open",
                    "change": "more likely"
                },
                {
                    "type": "event",
                    "event": "I remove all contents from the jar.",
                    "change": "more likely"
                },
                {
                    "type": "predicted_entity",
                    "entity": "jar",
                    "attribute": "open",
                    "change": "True"
                },
                {
                    "type": "predicted_event",
                    "event": "I remove all contents from the jar.",
                    "change": "more likely"
                }
            ],
            [
                {
                    "type": "step",
                    "step": "Open the coffee bean bag"
                },
                {
                    "type": "entity",
                    "entity": "the coffee bean bag",
                    "attribute": "open",
                    "change": "more likely"
                },
                {
                    "type": "event",
                    "event": "I remove all contents from the coffee bean bag.",
                    "change": "more likely"
                },
                {
                    "type": "predicted_entity",
                    "entity": "coffee_bean_bag",
                    "attribute": "open",
                    "change": "True"
                },
                {
                    "type": "predicted_event",
                    "event": "I remove all contents from the coffee bean bag.",
                    "change": "more likely"
                }
            ],
            [
                {
                    "type": "step",
                    "step": "Open the lid of the grinder."
                },
                {
                    "type": "predicted_entity",
                    "entity": "grinder",
                    "attribute": "open",
                    "change": "True"
                }
            ],
            [
                {
                    "type": "step",
                    "step": "Pour some coffee beans to the grinder"
                },
                {
                    "type": "entity",
                    "entity": "the grinder",
                    "attribute": "empty",
                    "change": "less likely"
                },
                {
                    "type": "predicted_entity",
                    "entity": "grinder",
                    "attribute": "empty",
                    "change": "False"
                }
            ],
            [
                {
                    "type": "step",
                    "step": "Plug in the grinder"
                },
                {
                    "type": "predicted_entity",
                    "entity": "grinder",
                    "attribute": "plugged_in",
                    "change": "True"
                }
            ],
            [
                {
                    "type": "step",
                    "step": "Set the grinding options"
                }
            ],
            [
                {
                    "type": "step",
                    "step": "Press the button"
                }
            ],
            [
                {
                    "type": "step",
                    "step": "Wait until the grinder stops automatically"
                },
                {
                    "type": "entity",
                    "entity": "the coffee bean",
                    "attribute": "grounded",
                    "change": "more likely"
                },
                {
                    "type": "event",
                    "event": "The coffee beans are in the shape of powder.",
                    "change": "more likely"
                },
                {
                    "type": "predicted_entity",
                    "entity": "coffee_bean",
                    "attribute": "grounded",
                    "change": "True"
                },
                {
                    "type": "predicted_event",
                    "event": "The coffee beans are in the shape of powder.",
                    "change": "more likely"
                },
                {
                    "type": "predicted_event",
                    "event": "I can use the beans to make expresso.",
                    "change": "more likely"
                }
            ],
            [
                {
                    "type": "step",
                    "step": "Open the lid of the grinder"
                },
                {
                    "type": "event",
                    "event": "I can use the beans to make expresso.",
                    "change": "more likely"
                },
                {
                    "type": "predicted_entity",
                    "entity": "grinder",
                    "attribute": "open",
                    "change": "True"
                }
            ],
            [
                {
                    "type": "step",
                    "step": "Pour all the grounded coffee into the jar"
                },
                {
                    "type": "entity",
                    "entity": "the grinder",
                    "attribute": "empty",
                    "change": "more likely"
                },
                {
                    "type": "predicted_entity",
                    "entity": "grinder",
                    "attribute": "empty",
                    "change": "True"
                },
                {
                    "type": "predicted_entity",
                    "entity": "jar",
                    "attribute": "empty",
                    "change": "False"
                }
            ],
            [
                {
                    "type": "step",
                    "step": "Seal the jar"
                },
                {
                    "type": "entity",
                    "entity": "the jar",
                    "attribute": "open",
                    "change": "less likely"
                },
                {
                    "type": "event",
                    "event": "I remove all contents from the jar.",
                    "change": "less likely"
                },
                {
                    "type": "predicted_entity",
                    "entity": "jar",
                    "attribute": "open",
                    "change": "False"
                },
                {
                    "type": "predicted_event",
                    "event": "I remove all contents from the jar.",
                    "change": "less likely"
                }
            ],
            [
                {
                    "type": "step",
                    "step": "Unplug the grinder."
                },
                {
                    "type": "predicted_entity",
                    "entity": "grinder",
                    "attribute": "plugged_in",
                    "change": "False"
                }
            ],
            [
                {
                    "type": "step",
                    "step": "Seal the coffee bean bag."
                },
                {
                    "type": "entity",
                    "entity": "the coffee bean bag",
                    "attribute": "open",
                    "change": "less likely"
                },
                {
                    "type": "event",
                    "event": "I remove all contents from the coffee bean bag.",
                    "change": "less likely"
                },
                {
                    "type": "predicted_entity",
                    "entity": "coffee_bean_bag",
                    "attribute": "open",
                    "change": "False"
                },
                {
                    "type": "predicted_event",
                    "event": "I remove all contents from the coffee bean bag.",
                    "change": "less likely"
                }
            ]
        ]
    },
    "22": {
        "goal": "Make coffee expresso",
        "annotator": "Shuyan",
        "steps": [
            [
                {
                    "step": "Start."
                }
            ],
            [
                {
                    "type": "step",
                    "step": "Power on the expresso machine"
                },
                {
                    "type": "entity",
                    "entity": "the coffee machine",
                    "attribute": "powered on",
                    "change": "more likely"
                },
                {
                    "type": "event",
                    "event": "An indicator light shines.",
                    "change": "more likely"
                },
                {
                    "type": "predicted_entity",
                    "entity": "coffee_machine",
                    "attribute": "powered_on",
                    "change": "True"
                },
                {
                    "type": "predicted_event",
                    "event": "An indicator light shines.",
                    "change": "more likely"
                }
            ],
            [
                {
                    "type": "step",
                    "step": "Turn the machine to expresso mode."
                }
            ],
            [
                {
                    "type": "step",
                    "step": "Open the container where the grounded coffee is."
                },
                {
                    "type": "predicted_entity",
                    "entity": "coffee_machine",
                    "attribute": "container_open",
                    "change": "True"
                }
            ],
            [
                {
                    "type": "step",
                    "step": "Scoop the right amount of coffee to the portafilter."
                },
                {
                    "type": "predicted_entity",
                    "entity": "coffee_machine",
                    "attribute": "portafilter_filled",
                    "change": "True"
                }
            ],
            [
                {
                    "type": "step",
                    "step": "Put a cup under the portafilter"
                },
                {
                    "type": "predicted_entity",
                    "entity": "coffee_machine",
                    "attribute": "cup_under_portafilter",
                    "change": "True"
                }
            ],
            [
                {
                    "type": "step",
                    "step": "Wait until the expresso mode is ready"
                },
                {
                    "type": "predicted_entity",
                    "entity": "coffee_machine",
                    "attribute": "ready",
                    "change": "True"
                }
            ],
            [
                {
                    "type": "step",
                    "step": "Set the machine to expresso producing mode"
                },
                {
                    "type": "predicted_entity",
                    "entity": "expresso",
                    "attribute": "produced",
                    "change": "True"
                },
                {
                    "type": "predicted_event",
                    "event": "I drink the coffee expresso.",
                    "change": "more likely"
                }
            ],
            [
                {
                    "type": "step",
                    "step": "Stop the coffee machine"
                },
                {
                    "type": "entity",
                    "entity": "the expresso",
                    "attribute": "ready",
                    "change": "more likely"
                },
                {
                    "type": "event",
                    "event": "I drink the coffee expresso.",
                    "change": "more likely"
                },
                {
                    "type": "predicted_entity",
                    "entity": "expresso",
                    "attribute": "ready",
                    "change": "True"
                }
            ],
            [
                {
                    "type": "step",
                    "step": "Power off the expresso machine"
                },
                {
                    "type": "entity",
                    "entity": "the coffee machine",
                    "attribute": "powered on",
                    "change": "less likely"
                },
                {
                    "type": "event",
                    "event": "An indicator light shines.",
                    "change": "less likely"
                },
                {
                    "type": "predicted_entity",
                    "entity": "coffee_machine",
                    "attribute": "powered_on",
                    "change": "False"
                },
                {
                    "type": "predicted_event",
                    "event": "An indicator light shines.",
                    "change": "less likely"
                }
            ]
        ]
    },
    "25": {
        "goal": "Bath your dog",
        "annotator": "Yue",
        "steps": [
            [
                {
                    "step": "Start."
                }
            ],
            [
                {
                    "type": "step",
                    "step": "Get the water temperature right."
                }
            ],
            [
                {
                    "type": "step",
                    "step": "Wet your dog's body with water."
                },
                {
                    "type": "entity",
                    "entity": "the dog",
                    "attribute": "wet",
                    "change": "more likely"
                },
                {
                    "type": "event",
                    "event": "I walk the dog.",
                    "change": "less likely"
                },
                {
                    "type": "event",
                    "event": "I hug the dog and water on my clothes.",
                    "change": "more likely"
                },
                {
                    "type": "predicted_entity",
                    "entity": "dog",
                    "attribute": "wet",
                    "change": "True"
                },
                {
                    "type": "predicted_event",
                    "event": "I hug the dog and water on my clothes.",
                    "change": "more likely"
                }
            ],
            [
                {
                    "type": "step",
                    "step": "Apply the shampoo."
                },
                {
                    "type": "entity",
                    "entity": "the shampoo",
                    "attribute": "on the dog's body",
                    "change": "more likely"
                },
                {
                    "type": "event",
                    "event": "Bubbles can be seen on the dog.",
                    "change": "more likely"
                },
                {
                    "type": "predicted_entity",
                    "entity": "shampoo",
                    "attribute": "on_dog's_body",
                    "change": "True"
                },
                {
                    "type": "predicted_event",
                    "event": "Bubbles can be seen on the dog.",
                    "change": "more likely"
                }
            ],
            [
                {
                    "type": "step",
                    "step": "Rinse your dog until the water from his fur runs clear."
                },
                {
                    "type": "entity",
                    "entity": "the shampoo",
                    "attribute": "on the dog's body",
                    "change": "less likely"
                },
                {
                    "type": "event",
                    "event": "Bubbles can be seen on the dog.",
                    "change": "less likely"
                },
                {
                    "type": "predicted_entity",
                    "entity": "shampoo",
                    "attribute": "on_dog's_body",
                    "change": "False"
                },
                {
                    "type": "predicted_event",
                    "event": "Bubbles can be seen on the dog.",
                    "change": "less likely"
                }
            ],
            [
                {
                    "type": "step",
                    "step": "Dry your dog."
                },
                {
                    "type": "entity",
                    "entity": "the dog",
                    "attribute": "wet",
                    "change": "less likely"
                },
                {
                    "type": "event",
                    "event": "I walk the dog.",
                    "change": "more likely"
                },
                {
                    "type": "event",
                    "event": "I hug the dog and water on my clothes.",
                    "change": "more likely"
                },
                {
                    "type": "predicted_entity",
                    "entity": "dog",
                    "attribute": "wet",
                    "change": "False"
                },
                {
                    "type": "predicted_event",
                    "event": "I hug the dog and water on my clothes.",
                    "change": "less likely"
                }
            ],
            [
                {
                    "type": "step",
                    "step": "Give your dog a treat."
                },
                {
                    "type": "entity",
                    "entity": "the dog",
                    "attribute": "happy",
                    "change": "more likely"
                },
                {
                    "type": "event",
                    "event": "I walk the dog.",
                    "change": "more likely"
                },
                {
                    "type": "predicted_entity",
                    "entity": "dog",
                    "attribute": "happy",
                    "change": "True"
                },
                {
                    "type": "predicted_event",
                    "event": "I walk the dog.",
                    "change": "more likely"
                }
            ]
        ]
    },
    "27": {
        "goal": "Clean toilet bowl",
        "annotator": "Yue",
        "steps": [
            [
                {
                    "step": "Start."
                }
            ],
            [
                {
                    "type": "step",
                    "step": "Flush toilet."
                }
            ],
            [
                {
                    "type": "step",
                    "step": "Pour 1/3 cup of bleach into the bowl."
                },
                {
                    "type": "entity",
                    "entity": "the bleach",
                    "attribute": "in the bowl",
                    "change": "more likely"
                },
                {
                    "type": "event",
                    "event": "Someone uses the toilet.",
                    "change": "less likely"
                },
                {
                    "type": "predicted_entity",
                    "entity": "bleach",
                    "attribute": "in_bowl",
                    "change": "True"
                }
            ],
            [
                {
                    "type": "step",
                    "step": "Scrub the bowl with a toilet brush, making sure to get under the rim."
                }
            ],
            [
                {
                    "type": "step",
                    "step": "Wait 6 minutes for disinfecting. Don't allow pets or children near the toilet."
                }
            ],
            [
                {
                    "type": "step",
                    "step": "Flush the toilet again."
                },
                {
                    "type": "entity",
                    "entity": "the bleach",
                    "attribute": "in the bowl",
                    "change": "less likely"
                },
                {
                    "type": "event",
                    "event": "I use the toilet.",
                    "change": "more likely"
                },
                {
                    "type": "predicted_entity",
                    "entity": "bleach",
                    "attribute": "in_bowl",
                    "change": "False"
                }
            ]
        ]
    },
    "28": {
        "goal": "Dispose of Dog Poop",
        "annotator": "Yue",
        "steps": [
            [
                {
                    "step": "Start."
                }
            ],
            [
                {
                    "type": "step",
                    "step": "Pick up dog poop."
                },
                {
                    "type": "entity",
                    "entity": "my hand",
                    "attribute": "dirty",
                    "change": "more likely"
                },
                {
                    "type": "event",
                    "event": "I touch my face.",
                    "change": "less likely"
                },
                {
                    "type": "predicted_entity",
                    "entity": "hand",
                    "attribute": "dirty",
                    "change": "True"
                },
                {
                    "type": "predicted_event",
                    "event": "I touch my face.",
                    "change": "more likely"
                }
            ],
            [
                {
                    "type": "step",
                    "step": "Place the dog poop in a plastic bag."
                },
                {
                    "type": "predicted_entity",
                    "entity": "poop",
                    "attribute": "in_bag",
                    "change": "True"
                }
            ],
            [
                {
                    "type": "step",
                    "step": "Tie up the bag neatly."
                },
                {
                    "type": "entity",
                    "entity": "the poop",
                    "attribute": "exposed to air",
                    "change": "less likely"
                },
                {
                    "type": "predicted_entity",
                    "entity": "poop",
                    "attribute": "exposed_to_air",
                    "change": "False"
                }
            ],
            [
                {
                    "type": "step",
                    "step": "Put the bag in the trash can."
                },
                {
                    "type": "predicted_entity",
                    "entity": "poop",
                    "attribute": "in_bag",
                    "change": "False"
                }
            ],
            [
                {
                    "type": "step",
                    "step": "Wash your hands thoroughly."
                },
                {
                    "type": "entity",
                    "entity": "my hand",
                    "attribute": "dirty",
                    "change": "less likely"
                },
                {
                    "type": "event",
                    "event": "I touch my face.",
                    "change": "more likely"
                },
                {
                    "type": "predicted_entity",
                    "entity": "hand",
                    "attribute": "dirty",
                    "change": "False"
                },
                {
                    "type": "predicted_event",
                    "event": "I touch my face.",
                    "change": "less likely"
                }
            ]
        ]
    },
    "29": {
        "goal": "Clean and sanitize a cutting board",
        "annotator": "Yue",
        "steps": [
            [
                {
                    "step": "Start."
                }
            ],
            [
                {
                    "type": "step",
                    "step": "Scrub the board with warm water."
                },
                {
                    "type": "entity",
                    "entity": "the board",
                    "attribute": "wet",
                    "change": "more likely"
                },
                {
                    "type": "event",
                    "event": "I cut food on the board.",
                    "change": "less likely"
                },
                {
                    "type": "predicted_entity",
                    "entity": "board",
                    "attribute": "wet",
                    "change": "True"
                }
            ],
            [
                {
                    "type": "step",
                    "step": "Let the board air-dry for several hours."
                },
                {
                    "type": "entity",
                    "entity": "the board",
                    "attribute": "wet",
                    "change": "less likely"
                },
                {
                    "type": "event",
                    "event": "I cut food on the board.",
                    "change": "more likely"
                },
                {
                    "type": "predicted_entity",
                    "entity": "board",
                    "attribute": "wet",
                    "change": "False"
                }
            ],
            [
                {
                    "type": "step",
                    "step": "Sanitize and deodorize your cutting board with vinegar or a commercial, food-safe sanitizer."
                },
                {
                    "type": "entity",
                    "entity": "the board",
                    "attribute": "wet",
                    "change": "more likely"
                },
                {
                    "type": "entity",
                    "entity": "chemical materials",
                    "attribute": "on the board",
                    "change": "more likely"
                },
                {
                    "type": "event",
                    "event": "I cut food on the board.",
                    "change": "less likely"
                },
                {
                    "type": "predicted_entity",
                    "entity": "board",
                    "attribute": "wet",
                    "change": "True"
                },
                {
                    "type": "predicted_entity",
                    "entity": "chemical_materials",
                    "attribute": "on_board",
                    "change": "True"
                }
            ],
            [
                {
                    "type": "step",
                    "step": "Let the board air-dry before placing it back in storage."
                },
                {
                    "type": "entity",
                    "entity": "the board",
                    "attribute": "wet",
                    "change": "less likely"
                },
                {
                    "type": "entity",
                    "entity": "chemical materials",
                    "attribute": "on the board",
                    "change": "less likely"
                },
                {
                    "type": "event",
                    "event": "I cut food on the board.",
                    "change": "more likely"
                },
                {
                    "type": "predicted_entity",
                    "entity": "board",
                    "attribute": "wet",
                    "change": "False"
                },
                {
                    "type": "predicted_entity",
                    "entity": "chemical_materials",
                    "attribute": "on_board",
                    "change": "False"
                }
            ]
        ]
    },
    "30": {
        "goal": "Fly a Dual Line Kite",
        "annotator": "Yue",
        "steps": [
            [
                {
                    "step": "Start."
                }
            ],
            [
                {
                    "type": "step",
                    "step": "Assemble the kite inside."
                },
                {
                    "type": "predicted_entity",
                    "entity": "kite",
                    "attribute": "assembled",
                    "change": "True"
                }
            ],
            [
                {
                    "type": "step",
                    "step": "Stand with your back toward the wind."
                }
            ],
            [
                {
                    "type": "step",
                    "step": "Walk backward."
                }
            ],
            [
                {
                    "type": "step",
                    "step": "Pull gently on the lines."
                },
                {
                    "type": "entity",
                    "entity": "the kite",
                    "attribute": "in the sky",
                    "change": "more likely"
                },
                {
                    "type": "event",
                    "event": "I let go of the kite.",
                    "change": "less likely"
                },
                {
                    "type": "predicted_entity",
                    "entity": "kite",
                    "attribute": "in_sky",
                    "change": "True"
                },
                {
                    "type": "predicted_event",
                    "event": "I let go of the kite.",
                    "change": "less likely"
                }
            ],
            [
                {
                    "type": "step",
                    "step": "Land your kite."
                },
                {
                    "type": "entity",
                    "entity": "the kite",
                    "attribute": "in the sky",
                    "change": "less likely"
                },
                {
                    "type": "event",
                    "event": "I let go of the kite.",
                    "change": "more likely"
                },
                {
                    "type": "predicted_entity",
                    "entity": "kite",
                    "attribute": "in_sky",
                    "change": "False"
                },
                {
                    "type": "predicted_event",
                    "event": "I let go of the kite.",
                    "change": "more likely"
                }
            ]
        ]
    },
    "31": {
        "goal": "Place a Coin in the Door Hinge",
        "annotator": "Yue",
        "steps": [
            [
                {
                    "step": "Start."
                }
            ],
            [
                {
                    "type": "step",
                    "step": "Grab a coin."
                },
                {
                    "type": "predicted_entity",
                    "entity": "coin",
                    "attribute": "grabbed",
                    "change": "True"
                }
            ],
            [
                {
                    "type": "step",
                    "step": "Open the door slightly."
                },
                {
                    "type": "entity",
                    "entity": "the door",
                    "attribute": "open",
                    "change": "more likely"
                },
                {
                    "type": "event",
                    "event": "A person enters through the door.",
                    "change": "more likely"
                },
                {
                    "type": "predicted_entity",
                    "entity": "door",
                    "attribute": "open",
                    "change": "True"
                },
                {
                    "type": "predicted_event",
                    "event": "I fully open the door.",
                    "change": "less likely"
                }
            ],
            [
                {
                    "type": "step",
                    "step": "Insert the coin into the upper hinge."
                },
                {
                    "type": "entity",
                    "entity": "the coin",
                    "attribute": "in the hinge",
                    "change": "more likely"
                },
                {
                    "type": "event",
                    "event": "I fully open the door.",
                    "change": "less likely"
                },
                {
                    "type": "predicted_entity",
                    "entity": "coin",
                    "attribute": "in_hinge",
                    "change": "True"
                },
                {
                    "type": "predicted_event",
                    "event": "A person enters through the door.",
                    "change": "more likely"
                }
            ],
            [
                {
                    "type": "step",
                    "step": "Secure the coin with tape, if necessary."
                },
                {
                    "type": "predicted_entity",
                    "entity": "coin",
                    "attribute": "secured",
                    "change": "True"
                }
            ],
            [
                {
                    "type": "step",
                    "step": "Try a coin in the lower hinge if this does not work."
                },
                {
                    "type": "predicted_entity",
                    "entity": "coin",
                    "attribute": "in_hinge",
                    "change": "True"
                },
                {
                    "type": "predicted_event",
                    "event": "A person enters through the door.",
                    "change": "more likely"
                }
            ]
        ]
    },
    "33": {
        "goal": "Frame a Puzzle",
        "annotator": "Weiqiu",
        "steps": [
            [
                {
                    "step": "Start."
                }
            ],
            [
                {
                    "type": "step",
                    "step": "Find a frame that fits your puzzle."
                }
            ],
            [
                {
                    "type": "step",
                    "step": "Cut a backing material to fit the frame."
                }
            ],
            [
                {
                    "type": "step",
                    "step": "Slide a layer of wax paper under the puzzle."
                }
            ],
            [
                {
                    "type": "step",
                    "step": "Use a rolling pin to flatten the puzzle."
                }
            ],
            [
                {
                    "type": "step",
                    "step": "Brush puzzle glue over the surface of the puzzle."
                },
                {
                    "type": "entity",
                    "entity": "front of the puzzle",
                    "attribute": "sticky",
                    "change": "more likely"
                },
                {
                    "type": "event",
                    "event": "My hands get sticky after I touch the puzzle.",
                    "change": "more likely"
                },
                {
                    "type": "predicted_entity",
                    "entity": "front_of_puzzle",
                    "attribute": "sticky",
                    "change": "True"
                },
                {
                    "type": "predicted_event",
                    "event": "My hands get sticky after I touch the puzzle.",
                    "change": "more likely"
                }
            ],
            [
                {
                    "type": "step",
                    "step": "Wait for the glue to dry."
                },
                {
                    "type": "entity",
                    "entity": "front of the puzzle",
                    "attribute": "sticky",
                    "change": "less likely"
                },
                {
                    "type": "event",
                    "event": "My hands get sticky after I touch the puzzle.",
                    "change": "less likely"
                },
                {
                    "type": "event",
                    "event": "The puzzle is taken apart.",
                    "change": "less likely"
                },
                {
                    "type": "predicted_entity",
                    "entity": "front_of_puzzle",
                    "attribute": "sticky",
                    "change": "False"
                },
                {
                    "type": "predicted_event",
                    "event": "My hands get sticky after I touch the puzzle.",
                    "change": "less likely"
                }
            ],
            [
                {
                    "type": "step",
                    "step": "Glue the puzzle to the backing material."
                },
                {
                    "type": "entity",
                    "entity": "back of the puzzle",
                    "attribute": "adhering to material",
                    "change": "more likely"
                },
                {
                    "type": "event",
                    "event": "I can see the back of the puzzle.",
                    "change": "less likely"
                },
                {
                    "type": "predicted_entity",
                    "entity": "back_of_puzzle",
                    "attribute": "adhering_to_material",
                    "change": "True"
                },
                {
                    "type": "predicted_event",
                    "event": "I can see the back of the puzzle.",
                    "change": "more likely"
                }
            ],
            [
                {
                    "type": "step",
                    "step": "Let the puzzle dry for at least 24 hours, weighing it down if necessary."
                },
                {
                    "type": "predicted_entity",
                    "entity": "back_of_puzzle",
                    "attribute": "adhering_to_material",
                    "change": "False"
                },
                {
                    "type": "predicted_event",
                    "event": "I can see the back of the puzzle.",
                    "change": "less likely"
                }
            ],
            [
                {
                    "type": "step",
                    "step": "Frame the puzzle."
                }
            ]
        ]
    },
    "35": {
        "goal": "Set up a tent",
        "annotator": "Weiqiu",
        "steps": [
            [
                {
                    "step": "Start."
                }
            ],
            [
                {
                    "type": "step",
                    "step": "Lay a tarp down before putting up your tent."
                }
            ],
            [
                {
                    "type": "step",
                    "step": "Lay out and account for all the components of your tent."
                }
            ],
            [
                {
                    "type": "step",
                    "step": "Lay your tent onto the tarp."
                }
            ],
            [
                {
                    "type": "step",
                    "step": "Connect your tent poles."
                },
                {
                    "type": "predicted_entity",
                    "entity": "tent_poles",
                    "attribute": "connected",
                    "change": "True"
                },
                {
                    "type": "predicted_event",
                    "event": "The poles can support the weight of a tent.",
                    "change": "more likely"
                }
            ],
            [
                {
                    "type": "step",
                    "step": "Insert tent poles into the corresponding flaps in the tent."
                },
                {
                    "type": "entity",
                    "entity": "the tent poles",
                    "attribute": "upright",
                    "change": "more likely"
                },
                {
                    "type": "event",
                    "event": "The poles can support the weight of a tent.",
                    "change": "more likely"
                },
                {
                    "type": "predicted_entity",
                    "entity": "tent_poles",
                    "attribute": "upright",
                    "change": "True"
                },
                {
                    "type": "predicted_event",
                    "event": "A person walks under the tent.",
                    "change": "more likely"
                }
            ],
            [
                {
                    "type": "step",
                    "step": "Raise the tent."
                },
                {
                    "type": "entity",
                    "entity": "tent",
                    "attribute": "raised",
                    "change": "more likely"
                },
                {
                    "type": "event",
                    "event": "A person walks under the tent.",
                    "change": "more likely"
                },
                {
                    "type": "predicted_entity",
                    "entity": "tent",
                    "attribute": "raised",
                    "change": "True"
                },
                {
                    "type": "predicted_event",
                    "event": "Wind blows the tent away.",
                    "change": "more likely"
                }
            ],
            [
                {
                    "type": "step",
                    "step": "Stake the tent to the ground."
                },
                {
                    "type": "entity",
                    "entity": "the tent",
                    "attribute": "fixated to the ground",
                    "change": "more likely"
                },
                {
                    "type": "event",
                    "event": "Wind blows the tent away.",
                    "change": "less likely"
                },
                {
                    "type": "predicted_entity",
                    "entity": "tent",
                    "attribute": "fixated_to_ground",
                    "change": "True"
                },
                {
                    "type": "predicted_event",
                    "event": "Wind blows the tent away.",
                    "change": "less likely"
                }
            ],
            [
                {
                    "type": "step",
                    "step": "Add on the rain fly."
                },
                {
                    "type": "entity",
                    "entity": "the tent",
                    "attribute": "covered with a rain fly",
                    "change": "more likely"
                },
                {
                    "type": "event",
                    "event": "The tent gets wet inside if it rains.",
                    "change": "less likely"
                },
                {
                    "type": "predicted_entity",
                    "entity": "tent",
                    "attribute": "covered_with_rain_fly",
                    "change": "True"
                },
                {
                    "type": "predicted_event",
                    "event": "The tent gets wet inside if it rains.",
                    "change": "more likely"
                }
            ]
        ]
    },
    "36": {
        "goal": "Make a pie crust",
        "annotator": "Weiqiu",
        "steps": [
            [
                {
                    "step": "Start."
                }
            ],
            [
                {
                    "type": "step",
                    "step": "In a medium bowl, sift the flour, sugar, and salt until the ingredients are completely incorporated."
                },
                {
                    "type": "entity",
                    "entity": "ingredients",
                    "attribute": "mixed",
                    "change": "more likely"
                },
                {
                    "type": "event",
                    "event": "I can tell what ingredients are used by looking at the mixture.",
                    "change": "less likely"
                },
                {
                    "type": "predicted_entity",
                    "entity": "ingredients",
                    "attribute": "mixed",
                    "change": "True"
                },
                {
                    "type": "predicted_event",
                    "event": "I can tell what ingredients are used by looking at the mixture.",
                    "change": "more likely"
                }
            ],
            [
                {
                    "type": "step",
                    "step": "Cut in the butter."
                },
                {
                    "type": "predicted_entity",
                    "entity": "ingredients",
                    "attribute": "mixed",
                    "change": "True"
                },
                {
                    "type": "predicted_event",
                    "event": "I can tell what ingredients are used by looking at the mixture.",
                    "change": "more likely"
                }
            ],
            [
                {
                    "type": "step",
                    "step": "Mix in the egg."
                },
                {
                    "type": "predicted_entity",
                    "entity": "ingredients",
                    "attribute": "mixed",
                    "change": "True"
                },
                {
                    "type": "predicted_event",
                    "event": "I can tell what ingredients are used by looking at the mixture.",
                    "change": "more likely"
                }
            ],
            [
                {
                    "type": "step",
                    "step": "Turn the dough out onto a floured surface."
                },
                {
                    "type": "predicted_entity",
                    "entity": "dough",
                    "attribute": "mixed",
                    "change": "True"
                }
            ],
            [
                {
                    "type": "step",
                    "step": "Form a disc."
                },
                {
                    "type": "entity",
                    "entity": "the dough",
                    "attribute": "in the shape of a disc",
                    "change": "more likely"
                },
                {
                    "type": "event",
                    "event": "The dough is the same shape as the final pie crust.",
                    "change": "more likely"
                },
                {
                    "type": "predicted_entity",
                    "entity": "dough",
                    "attribute": "in_shape_of_disc",
                    "change": "True"
                },
                {
                    "type": "predicted_event",
                    "event": "The dough is the same shape as the final pie crust.",
                    "change": "more likely"
                }
            ],
            [
                {
                    "type": "step",
                    "step": "Refrigerate the dough for 1 hour."
                },
                {
                    "type": "predicted_entity",
                    "entity": "dough",
                    "attribute": "in_shape_of_disc",
                    "change": "True"
                },
                {
                    "type": "predicted_event",
                    "event": "The dough is the same shape as the final pie crust.",
                    "change": "more likely"
                }
            ],
            [
                {
                    "type": "step",
                    "step": "Roll out the crust."
                },
                {
                    "type": "predicted_entity",
                    "entity": "dough",
                    "attribute": "in_shape_of_disc",
                    "change": "False"
                },
                {
                    "type": "predicted_event",
                    "event": "The dough is the same shape as the final pie crust.",
                    "change": "less likely"
                },
                {
                    "type": "predicted_event",
                    "event": "I knead the crust into a different shape.",
                    "change": "more likely"
                }
            ],
            [
                {
                    "type": "step",
                    "step": "Freeze the crust."
                },
                {
                    "type": "entity",
                    "entity": "crust",
                    "attribute": "rock hard",
                    "change": "more likely"
                },
                {
                    "type": "event",
                    "event": "I knead the crust into a different shape.",
                    "change": "less likely"
                },
                {
                    "type": "predicted_entity",
                    "entity": "crust",
                    "attribute": "rock_hard",
                    "change": "True"
                }
            ],
            [
                {
                    "type": "step",
                    "step": "Preheat the oven to 350 degrees."
                }
            ],
            [
                {
                    "type": "step",
                    "step": "Bake the crust in two stages."
                },
                {
                    "type": "entity",
                    "entity": "crust",
                    "attribute": "hard",
                    "change": "more likely"
                },
                {
                    "type": "entity",
                    "entity": "the crust",
                    "attribute": "cooked",
                    "change": "more likely"
                },
                {
                    "type": "event",
                    "event": "The crust can be eaten.",
                    "change": "more likely"
                },
                {
                    "type": "predicted_entity",
                    "entity": "crust",
                    "attribute": "hard",
                    "change": "True"
                },
                {
                    "type": "predicted_entity",
                    "entity": "crust",
                    "attribute": "cooked",
                    "change": "True"
                },
                {
                    "type": "predicted_event",
                    "event": "The crust can be eaten.",
                    "change": "more likely"
                }
            ]
        ]
    },
    "38": {
        "goal": "Go to see a musical",
        "annotator": "Weiqiu",
        "steps": [
            [
                {
                    "step": "Start."
                }
            ],
            [
                {
                    "type": "step",
                    "step": "Compare different websites to find the cheapest ticket."
                }
            ],
            [
                {
                    "type": "step",
                    "step": "Buy the ticket online."
                },
                {
                    "type": "entity",
                    "entity": "your ticket",
                    "attribute": "secured",
                    "change": "more likely"
                },
                {
                    "type": "event",
                    "event": "I have paid for the musical.",
                    "change": "more likely"
                },
                {
                    "type": "predicted_entity",
                    "entity": "your_ticket",
                    "attribute": "secured",
                    "change": "True"
                },
                {
                    "type": "predicted_event",
                    "event": "I have paid for the musical.",
                    "change": "more likely"
                }
            ],
            [
                {
                    "type": "step",
                    "step": "Go to the musical theater."
                },
                {
                    "type": "entity",
                    "entity": "you",
                    "attribute": "in the theater",
                    "change": "more likely"
                },
                {
                    "type": "event",
                    "event": "You can see other audience around you.",
                    "change": "more likely"
                },
                {
                    "type": "predicted_entity",
                    "entity": "you",
                    "attribute": "in_theater",
                    "change": "True"
                },
                {
                    "type": "predicted_event",
                    "event": "You can see other audience around you.",
                    "change": "more likely"
                }
            ],
            [
                {
                    "type": "step",
                    "step": "Find your seat."
                },
                {
                    "type": "entity",
                    "entity": "you",
                    "attribute": "standing",
                    "change": "less likely"
                },
                {
                    "type": "event",
                    "event": "You walk around.",
                    "change": "less likely"
                },
                {
                    "type": "predicted_entity",
                    "entity": "you",
                    "attribute": "standing",
                    "change": "False"
                },
                {
                    "type": "predicted_event",
                    "event": "You walk around.",
                    "change": "less likely"
                }
            ],
            [
                {
                    "type": "step",
                    "step": "Watch the musical."
                },
                {
                    "type": "entity",
                    "entity": "the musical",
                    "attribute": "playing",
                    "change": "more likely"
                },
                {
                    "type": "event",
                    "event": "I make a phone call.",
                    "change": "less likely"
                },
                {
                    "type": "predicted_entity",
                    "entity": "musical",
                    "attribute": "playing",
                    "change": "True"
                },
                {
                    "type": "predicted_event",
                    "event": "I make a phone call.",
                    "change": "less likely"
                }
            ],
            [
                {
                    "type": "step",
                    "step": "Leave the theater."
                },
                {
                    "type": "entity",
                    "entity": "you",
                    "attribute": "in the theater",
                    "change": "less likely"
                },
                {
                    "type": "event",
                    "event": "You can see other audience around you.",
                    "change": "less likely"
                },
                {
                    "type": "entity",
                    "entity": "you",
                    "attribute": "standing",
                    "change": "more likely"
                },
                {
                    "type": "event",
                    "event": "You walk around.",
                    "change": "less likely"
                },
                {
                    "type": "entity",
                    "entity": "the musical",
                    "attribute": "playing",
                    "change": "less likely"
                },
                {
                    "type": "event",
                    "event": "I make a phone call.",
                    "change": "more likely"
                },
                {
                    "type": "predicted_entity",
                    "entity": "you",
                    "attribute": "in_theater",
                    "change": "False"
                },
                {
                    "type": "predicted_entity",
                    "entity": "you",
                    "attribute": "standing",
                    "change": "True"
                },
                {
                    "type": "predicted_entity",
                    "entity": "musical",
                    "attribute": "playing",
                    "change": "False"
                },
                {
                    "type": "predicted_event",
                    "event": "You can see other audience around you.",
                    "change": "less likely"
                },
                {
                    "type": "predicted_event",
                    "event": "You walk around.",
                    "change": "more likely"
                }
            ]
        ]
    },
    "40": {
        "goal": "Draw an music animation",
        "annotator": "Weiqiu",
        "steps": [
            [
                {
                    "step": "Start."
                }
            ],
            [
                {
                    "type": "step",
                    "step": "Decide on a background music."
                },
                {
                    "type": "predicted_entity",
                    "entity": "music",
                    "attribute": "decided",
                    "change": "True"
                }
            ],
            [
                {
                    "type": "step",
                    "step": "Write down an outline of what to draw for each line of lyrics."
                }
            ],
            [
                {
                    "type": "step",
                    "step": "Draw the key frames for each scene."
                },
                {
                    "type": "entity",
                    "entity": "key frames",
                    "attribute": "drawn",
                    "change": "more likely"
                },
                {
                    "type": "event",
                    "event": "The actual drawing has started.",
                    "change": "more likely"
                },
                {
                    "type": "predicted_entity",
                    "entity": "key_frames",
                    "attribute": "drawn",
                    "change": "True"
                },
                {
                    "type": "predicted_event",
                    "event": "The actual drawing has started.",
                    "change": "more likely"
                }
            ],
            [
                {
                    "type": "step",
                    "step": "Draw the in-betweens and everything else."
                },
                {
                    "type": "entity",
                    "entity": "in-betweens",
                    "attribute": "drawn",
                    "change": "more likely"
                },
                {
                    "type": "event",
                    "event": "The actual drawing has finished.",
                    "change": "more likely"
                },
                {
                    "type": "predicted_entity",
                    "entity": "in-betweens",
                    "attribute": "drawn",
                    "change": "True"
                },
                {
                    "type": "predicted_entity",
                    "entity": "drawings",
                    "attribute": "drawn",
                    "change": "True"
                },
                {
                    "type": "predicted_event",
                    "event": "The actual drawing has finished.",
                    "change": "more likely"
                }
            ],
            [
                {
                    "type": "step",
                    "step": "Open a video editor like DaVinci Resolve or iMovie."
                }
            ],
            [
                {
                    "type": "step",
                    "step": "Import the music and the drawings."
                },
                {
                    "type": "entity",
                    "entity": "the drawings",
                    "attribute": "imported",
                    "change": "more likely"
                },
                {
                    "type": "entity",
                    "entity": "the music",
                    "attribute": "imported",
                    "change": "more likely"
                },
                {
                    "type": "event",
                    "event": "The required audio and video files are on the computer.",
                    "change": "more likely"
                },
                {
                    "type": "predicted_entity",
                    "entity": "drawings",
                    "attribute": "imported",
                    "change": "True"
                },
                {
                    "type": "predicted_entity",
                    "entity": "music",
                    "attribute": "imported",
                    "change": "True"
                },
                {
                    "type": "predicted_event",
                    "event": "The required audio and video files are on the computer.",
                    "change": "more likely"
                }
            ],
            [
                {
                    "type": "step",
                    "step": "Put the music on the timeline."
                },
                {
                    "type": "entity",
                    "entity": "the music",
                    "attribute": "on the timeline",
                    "change": "more likely"
                },
                {
                    "type": "predicted_entity",
                    "entity": "music",
                    "attribute": "on_timeline",
                    "change": "True"
                }
            ],
            [
                {
                    "type": "step",
                    "step": "Put the drawings on the timeline."
                },
                {
                    "type": "entity",
                    "entity": "the drawings",
                    "attribute": "on the timeline",
                    "change": "more likely"
                },
                {
                    "type": "predicted_entity",
                    "entity": "drawings",
                    "attribute": "on_timeline",
                    "change": "True"
                }
            ],
            [
                {
                    "type": "step",
                    "step": "Line up drawings with the music."
                },
                {
                    "type": "entity",
                    "entity": "the drawings and music",
                    "attribute": "lined up",
                    "change": "more likely"
                },
                {
                    "type": "event",
                    "event": "The audio and video plays in sync.",
                    "change": "more likely"
                },
                {
                    "type": "predicted_entity",
                    "entity": "drawings_and_music",
                    "attribute": "lined_up",
                    "change": "True"
                },
                {
                    "type": "predicted_event",
                    "event": "The audio and video plays in sync.",
                    "change": "more likely"
                }
            ],
            [
                {
                    "type": "step",
                    "step": "Export the video."
                }
            ]
        ]
    },
    "43": {
        "goal": "Apply a screen protector on a phone",
        "annotator": "Weiqiu",
        "steps": [
            [
                {
                    "step": "Start."
                }
            ],
            [
                {
                    "type": "step",
                    "step": "Get a screen protector."
                },
                {
                    "type": "predicted_entity",
                    "entity": "screen_protector",
                    "attribute": "has",
                    "change": "True"
                }
            ],
            [
                {
                    "type": "step",
                    "step": "Find a low-dust workspace."
                }
            ],
            [
                {
                    "type": "step",
                    "step": "Wash your hands."
                }
            ],
            [
                {
                    "type": "step",
                    "step": "Clean the screen."
                },
                {
                    "type": "entity",
                    "entity": "the screen",
                    "attribute": "dirty",
                    "change": "less likely"
                },
                {
                    "type": "event",
                    "event": "A phone screen fails to stick on the screen.",
                    "change": "less likely"
                },
                {
                    "type": "predicted_entity",
                    "entity": "screen",
                    "attribute": "dirty",
                    "change": "False"
                }
            ],
            [
                {
                    "type": "step",
                    "step": "Check placement of the screen protector."
                }
            ],
            [
                {
                    "type": "step",
                    "step": "Peel off the screen protector."
                },
                {
                    "type": "predicted_entity",
                    "entity": "screen_protector",
                    "attribute": "peeled",
                    "change": "True"
                }
            ],
            [
                {
                    "type": "step",
                    "step": "Place the screen protector carefully on the phone screen so that the edges align."
                },
                {
                    "type": "entity",
                    "entity": "the screen protector",
                    "attribute": "on the phone",
                    "change": "more likely"
                },
                {
                    "type": "event",
                    "event": "My phone screen breaks if I drop my phone.",
                    "change": "less likely"
                },
                {
                    "type": "predicted_entity",
                    "entity": "screen_protector",
                    "attribute": "on_phone",
                    "change": "True"
                },
                {
                    "type": "predicted_event",
                    "event": "A phone screen fails to stick on the screen.",
                    "change": "more likely"
                },
                {
                    "type": "predicted_event",
                    "event": "My phone screen breaks if I drop my phone.",
                    "change": "less likely"
                }
            ],
            [
                {
                    "type": "step",
                    "step": "Remove air bubbles."
                },
                {
                    "type": "predicted_entity",
                    "entity": "screen_protector",
                    "attribute": "bubbles",
                    "change": "False"
                }
            ]
        ]
    },
    "44": {
        "goal": "Jump a car battery",
        "annotator": "Manni",
        "steps": [
            [
                {
                    "step": "Start."
                }
            ],
            [
                {
                    "type": "step",
                    "step": "Open each car's hood and locate the battery"
                }
            ],
            [
                {
                    "type": "step",
                    "step": "Park the working car near, but not touching, the disabled car. "
                },
                {
                    "type": "entity",
                    "entity": "the two cars",
                    "attribute": "in vincinity",
                    "change": "more likely"
                },
                {
                    "type": "event",
                    "event": "A wire can be used to connect the two cars.",
                    "change": "more likely"
                },
                {
                    "type": "predicted_entity",
                    "entity": "two_cars",
                    "attribute": "in_vincinity",
                    "change": "True"
                },
                {
                    "type": "predicted_event",
                    "event": "A wire can be used to connect the two cars.",
                    "change": "more likely"
                }
            ],
            [
                {
                    "type": "step",
                    "step": "Put on safety gear (goggles and gloves) if you have it."
                }
            ],
            [
                {
                    "type": "step",
                    "step": "Untangle and unwind your jumper cables."
                }
            ],
            [
                {
                    "type": "step",
                    "step": "Connect the jumper cables"
                },
                {
                    "type": "entity",
                    "entity": "the working car",
                    "attribute": "connected with cables",
                    "change": "more likely"
                },
                {
                    "type": "event",
                    "event": "The working car safely drives away.",
                    "change": "less likely"
                },
                {
                    "type": "predicted_entity",
                    "entity": "working_car",
                    "attribute": "connected_with_cables",
                    "change": "True"
                },
                {
                    "type": "predicted_entity",
                    "entity": "disabled_car",
                    "attribute": "connected_with_cables",
                    "change": "True"
                }
            ],
            [
                {
                    "type": "step",
                    "step": "Start the working car. "
                },
                {
                    "type": "predicted_entity",
                    "entity": "working_car",
                    "attribute": "running",
                    "change": "True"
                },
                {
                    "type": "predicted_event",
                    "event": "Consistent engine sound comes from the disabled car.",
                    "change": "more likely"
                }
            ],
            [
                {
                    "type": "step",
                    "step": "Start the disabled vehicle"
                },
                {
                    "type": "entity",
                    "entity": "the disabled car",
                    "attribute": "started",
                    "change": "more likely"
                },
                {
                    "type": "event",
                    "event": "Consistent engine sound comes from the disabled car.",
                    "change": "more likely"
                },
                {
                    "type": "predicted_entity",
                    "entity": "disabled_car",
                    "attribute": "started",
                    "change": "True"
                }
            ],
            [
                {
                    "type": "step",
                    "step": "Remove the jumper cables."
                },
                {
                    "type": "entity",
                    "entity": "the working car",
                    "attribute": "connected with cables",
                    "change": "less likely"
                },
                {
                    "type": "event",
                    "event": "The working car safely drives away.",
                    "change": "more likely"
                },
                {
                    "type": "predicted_entity",
                    "entity": "working_car",
                    "attribute": "connected_with_cables",
                    "change": "False"
                },
                {
                    "type": "predicted_entity",
                    "entity": "disabled_car",
                    "attribute": "connected_with_cables",
                    "change": "False"
                }
            ],
            [
                {
                    "type": "step",
                    "step": "Keep the engine running"
                },
                {
                    "type": "predicted_entity",
                    "entity": "working_car",
                    "attribute": "running",
                    "change": "False"
                },
                {
                    "type": "predicted_entity",
                    "entity": "disabled_car",
                    "attribute": "running",
                    "change": "True"
                },
                {
                    "type": "predicted_event",
                    "event": "The working car safely drives away.",
                    "change": "more likely"
                }
            ]
        ]
    },
    "46": {
        "goal": "Make Colored Light Bulbs",
        "annotator": "Manni",
        "steps": [
            [
                {
                    "step": "Start."
                }
            ],
            [
                {
                    "type": "step",
                    "step": "Select a clear, 40 watt bulb."
                },
                {
                    "type": "predicted_entity",
                    "entity": "bulb",
                    "attribute": "clear",
                    "change": "True"
                },
                {
                    "type": "predicted_event",
                    "event": "I can see through the bulb.",
                    "change": "more likely"
                }
            ],
            [
                {
                    "type": "step",
                    "step": "Purchase special heat-resistant glass paint."
                },
                {
                    "type": "predicted_entity",
                    "entity": "paint",
                    "attribute": "heat_resistant",
                    "change": "True"
                }
            ],
            [
                {
                    "type": "step",
                    "step": "Clean your light bulbs with rubbing alcohol."
                },
                {
                    "type": "predicted_entity",
                    "entity": "bulb",
                    "attribute": "clean",
                    "change": "True"
                }
            ],
            [
                {
                    "type": "step",
                    "step": "Prop your light bulb up with tack."
                },
                {
                    "type": "predicted_entity",
                    "entity": "bulb",
                    "attribute": "propped",
                    "change": "True"
                }
            ],
            [
                {
                    "type": "step",
                    "step": "Use small brushes and apply the paint."
                },
                {
                    "type": "entity",
                    "entity": "the bulb",
                    "attribute": "transparent",
                    "change": "less likely"
                },
                {
                    "type": "event",
                    "event": "I can see through the bulb.",
                    "change": "less likely"
                },
                {
                    "type": "entity",
                    "entity": "the paint",
                    "attribute": "wet",
                    "change": "more likely"
                },
                {
                    "type": "event",
                    "event": "I touch the bulb and have paints on my hand.",
                    "change": "more likely"
                },
                {
                    "type": "predicted_entity",
                    "entity": "bulb",
                    "attribute": "transparent",
                    "change": "False"
                },
                {
                    "type": "predicted_entity",
                    "entity": "paint",
                    "attribute": "wet",
                    "change": "True"
                },
                {
                    "type": "predicted_event",
                    "event": "I can see through the bulb.",
                    "change": "less likely"
                },
                {
                    "type": "predicted_event",
                    "event": "I touch the bulb and have paints on my hand.",
                    "change": "more likely"
                }
            ],
            [
                {
                    "type": "step",
                    "step": "Allow air-dry paint to dry for 1 hour."
                },
                {
                    "type": "entity",
                    "entity": "the paint",
                    "attribute": "wet",
                    "change": "less likely"
                },
                {
                    "type": "event",
                    "event": "I touch the bulb and have paints on my hand.",
                    "change": "less likely"
                },
                {
                    "type": "predicted_entity",
                    "entity": "paint",
                    "attribute": "wet",
                    "change": "False"
                }
            ]
        ]
    },
    "48": {
        "goal": "Make packaged ramen in microwave",
        "annotator": "Manni",
        "steps": [
            [
                {
                    "step": "Start."
                }
            ],
            [
                {
                    "type": "step",
                    "step": "Remove the noodles from the package."
                },
                {
                    "type": "entity",
                    "entity": "package",
                    "attribute": "broken",
                    "change": "more likely"
                },
                {
                    "type": "event",
                    "event": "The ramen can be returned to the store.",
                    "change": "less likely"
                },
                {
                    "type": "predicted_entity",
                    "entity": "package",
                    "attribute": "broken",
                    "change": "True"
                },
                {
                    "type": "predicted_event",
                    "event": "The ramen can be returned to the store.",
                    "change": "less likely"
                }
            ],
            [
                {
                    "type": "step",
                    "step": "Put the noodles into a microwave safe bowl"
                },
                {
                    "type": "predicted_entity",
                    "entity": "ramen",
                    "attribute": "in_bowl",
                    "change": "True"
                }
            ],
            [
                {
                    "type": "step",
                    "step": "Add water such that the noodles are covered"
                },
                {
                    "type": "entity",
                    "entity": "ramen",
                    "attribute": "in water",
                    "change": "more likely"
                },
                {
                    "type": "predicted_entity",
                    "entity": "ramen",
                    "attribute": "in_water",
                    "change": "True"
                }
            ],
            [
                {
                    "type": "step",
                    "step": "Microwave the noodles for three to five minutes"
                },
                {
                    "type": "entity",
                    "entity": "water",
                    "attribute": "boiling",
                    "change": "more likely"
                },
                {
                    "type": "entity",
                    "entity": "ramen",
                    "attribute": "in boiling water",
                    "change": "more likely"
                },
                {
                    "type": "entity",
                    "entity": "ramen",
                    "attribute": "soft",
                    "change": "more likely"
                },
                {
                    "type": "event",
                    "event": "I can pick up some ramen with chopsticks.",
                    "change": "more likely"
                },
                {
                    "type": "predicted_entity",
                    "entity": "water",
                    "attribute": "boiling",
                    "change": "True"
                },
                {
                    "type": "predicted_entity",
                    "entity": "ramen",
                    "attribute": "in_boiling_water",
                    "change": "True"
                },
                {
                    "type": "predicted_entity",
                    "entity": "ramen",
                    "attribute": "soft",
                    "change": "True"
                }
            ],
            [
                {
                    "type": "step",
                    "step": "Let the noodles sit in the microwave for three minutes after the microwave stops."
                },
                {
                    "type": "predicted_entity",
                    "entity": "water",
                    "attribute": "boiling",
                    "change": "False"
                },
                {
                    "type": "predicted_entity",
                    "entity": "ramen",
                    "attribute": "in_boiling_water",
                    "change": "False"
                }
            ],
            [
                {
                    "type": "step",
                    "step": "Take the bowl out of the microwave."
                }
            ],
            [
                {
                    "type": "step",
                    "step": "Add in the flavor packet."
                },
                {
                    "type": "entity",
                    "entity": "ramen",
                    "attribute": "flavored",
                    "change": "more likely"
                },
                {
                    "type": "predicted_entity",
                    "entity": "ramen",
                    "attribute": "flavored",
                    "change": "True"
                },
                {
                    "type": "predicted_event",
                    "event": "I can pick up some ramen with chopsticks.",
                    "change": "more likely"
                }
            ]
        ]
    },
    "50": {
        "goal": "Throw a Football",
        "annotator": "Manni",
        "steps": [
            [
                {
                    "step": "Start"
                }
            ],
            [
                {
                    "type": "step",
                    "step": "Pick up the football with your throwing hand."
                },
                {
                    "type": "entity",
                    "entity": "football",
                    "attribute": "grasped",
                    "change": "more likely"
                },
                {
                    "type": "event",
                    "event": "Someone else takes the football.",
                    "change": "less likely"
                },
                {
                    "type": "predicted_entity",
                    "entity": "football",
                    "attribute": "grasped",
                    "change": "True"
                },
                {
                    "type": "predicted_event",
                    "event": "Both of my hands are grasping the ball.",
                    "change": "more likely"
                }
            ],
            [
                {
                    "type": "step",
                    "step": "Position your body in the throwing stance."
                }
            ],
            [
                {
                    "type": "step",
                    "step": "Hold the ball near your ear."
                }
            ],
            [
                {
                    "type": "step",
                    "step": "Stabilize the ball with your non-throwing hand."
                },
                {
                    "type": "entity",
                    "entity": "the ball",
                    "attribute": "held with two hands",
                    "change": "more likely"
                },
                {
                    "type": "event",
                    "event": "Both of my hands are grasping the ball.",
                    "change": "more likely"
                },
                {
                    "type": "predicted_entity",
                    "entity": "ball",
                    "attribute": "held_with_two_hands",
                    "change": "True"
                },
                {
                    "type": "predicted_event",
                    "event": "Both of my hands are grasping the ball.",
                    "change": "more likely"
                }
            ],
            [
                {
                    "type": "step",
                    "step": "Release your non-throwing hand from the ball."
                },
                {
                    "type": "entity",
                    "entity": "the ball",
                    "attribute": "held with two hands",
                    "change": "less likely"
                },
                {
                    "type": "event",
                    "event": "Both of my hands are grasping the ball.",
                    "change": "less likely"
                },
                {
                    "type": "predicted_entity",
                    "entity": "ball",
                    "attribute": "held_with_two_hands",
                    "change": "False"
                },
                {
                    "type": "predicted_event",
                    "event": "Both of my hands are grasping the ball.",
                    "change": "less likely"
                }
            ],
            [
                {
                    "type": "step",
                    "step": "Wind your throwing arm back."
                }
            ],
            [
                {
                    "type": "step",
                    "step": "Throw in a half-circular motion."
                },
                {
                    "type": "entity",
                    "entity": "football",
                    "attribute": "grasped",
                    "change": "less likely"
                },
                {
                    "type": "event",
                    "event": "Someone else takes the football.",
                    "change": "more likely"
                },
                {
                    "type": "predicted_entity",
                    "entity": "football",
                    "attribute": "grasped",
                    "change": "False"
                },
                {
                    "type": "predicted_event",
                    "event": "Someone else takes the football.",
                    "change": "more likely"
                },
                {
                    "type": "predicted_event",
                    "event": "Both of my hands are grasping the ball.",
                    "change": "less likely"
                }
            ]
        ]
    },
    "51": {
        "goal": "Play the clarinet",
        "annotator": "Hainiu",
        "steps": [
            [
                {
                    "step": "Start."
                }
            ],
            [
                {
                    "type": "step",
                    "step": "Inspect the parts of the clarinet."
                }
            ],
            [
                {
                    "type": "step",
                    "step": "Assemble the mouthpiece and reed properly."
                },
                {
                    "type": "entity",
                    "entity": "the clarinet",
                    "attribute": "assembled",
                    "change": "more likely"
                },
                {
                    "type": "event",
                    "event": "Someone can play a tune with the clarinet.",
                    "change": "more likely"
                },
                {
                    "type": "predicted_entity",
                    "entity": "clarinet",
                    "attribute": "assembled",
                    "change": "True"
                },
                {
                    "type": "predicted_event",
                    "event": "Someone can play a tune with the clarinet.",
                    "change": "more likely"
                }
            ],
            [
                {
                    "type": "step",
                    "step": "Hold the clarinet properly."
                }
            ],
            [
                {
                    "type": "step",
                    "step": "Disassemble and clean the clarinet after each use."
                },
                {
                    "type": "entity",
                    "entity": "the clarinet",
                    "attribute": "fully assembled",
                    "change": "less likely"
                },
                {
                    "type": "event",
                    "event": "Someone can play a tune with the clarinet.",
                    "change": "less likely"
                },
                {
                    "type": "predicted_entity",
                    "entity": "clarinet",
                    "attribute": "fully_assembled",
                    "change": "False"
                },
                {
                    "type": "predicted_event",
                    "event": "Someone can play a tune with the clarinet.",
                    "change": "less likely"
                }
            ]
        ]
    },
    "52": {
        "goal": "Wear contact lenses",
        "annotator": "Hainiu",
        "steps": [
            [
                {
                    "step": "Start."
                }
            ],
            [
                {
                    "type": "step",
                    "step": "Wash your hands with fragrance-free soap and warm water. "
                },
                {
                    "type": "entity",
                    "entity": "my hands",
                    "attribute": "dirty",
                    "change": "less likely"
                },
                {
                    "type": "event",
                    "event": "I touch my eyes which get irritated and start watering.",
                    "change": "less likely"
                },
                {
                    "type": "predicted_entity",
                    "entity": "hands",
                    "attribute": "dirty",
                    "change": "False"
                }
            ],
            [
                {
                    "type": "step",
                    "step": "Remove the lid on one side of your contact lens case and set it aside."
                },
                {
                    "type": "predicted_entity",
                    "entity": "contact_lenses",
                    "attribute": "lid_removed",
                    "change": "True"
                }
            ],
            [
                {
                    "type": "step",
                    "step": "Use your fingertip to slide the contact lens from the case."
                },
                {
                    "type": "entity",
                    "entity": "the contact lenses",
                    "attribute": "in the case",
                    "change": "less likely"
                },
                {
                    "type": "entity",
                    "entity": "the contact lens",
                    "attribute": "on my fingertip",
                    "change": "more likely"
                },
                {
                    "type": "predicted_entity",
                    "entity": "contact_lenses",
                    "attribute": "in_case",
                    "change": "False"
                },
                {
                    "type": "predicted_entity",
                    "entity": "contact_lens",
                    "attribute": "on_fingertip",
                    "change": "True"
                }
            ],
            [
                {
                    "type": "step",
                    "step": "Rinse the contact lens with your contact solution."
                },
                {
                    "type": "entity",
                    "entity": "contact lense",
                    "attribute": "sanitized",
                    "change": "more likely"
                },
                {
                    "type": "event",
                    "event": "The contact lens irratates my eyes.",
                    "change": "less likely"
                },
                {
                    "type": "predicted_entity",
                    "entity": "contact_lense",
                    "attribute": "sanitized",
                    "change": "True"
                }
            ],
            [
                {
                    "type": "step",
                    "step": "Place the contact concave side up on your index finger. "
                },
                {
                    "type": "predicted_entity",
                    "entity": "contact_lense",
                    "attribute": "on_fingertip",
                    "change": "True"
                }
            ],
            [
                {
                    "type": "step",
                    "step": "Hold your eye open with your middle finger and opposite hand, if necessary."
                }
            ],
            [
                {
                    "type": "step",
                    "step": "Move the contact towards your eyes calmly and steadily."
                }
            ],
            [
                {
                    "type": "step",
                    "step": "Place the contact on your iris gently and blink slowly."
                },
                {
                    "type": "entity",
                    "entity": "the contact lens",
                    "attribute": "on my fingertip",
                    "change": "less likely"
                },
                {
                    "type": "entity",
                    "entity": "the contact lenses",
                    "attribute": "on my eyes",
                    "change": "more likely"
                },
                {
                    "type": "event",
                    "event": "I see things clearly.",
                    "change": "more likely"
                },
                {
                    "type": "predicted_entity",
                    "entity": "contact_lens",
                    "attribute": "on_fingertip",
                    "change": "False"
                },
                {
                    "type": "predicted_entity",
                    "entity": "contact_lenses",
                    "attribute": "on_eyes",
                    "change": "True"
                },
                {
                    "type": "predicted_event",
                    "event": "I touch my eyes which get irritated and start watering.",
                    "change": "less likely"
                },
                {
                    "type": "predicted_event",
                    "event": "The contact lens irratates my eyes.",
                    "change": "less likely"
                },
                {
                    "type": "predicted_event",
                    "event": "I see things clearly.",
                    "change": "more likely"
                }
            ]
        ]
    },
    "54": {
        "goal": "Apply for a UK visa",
        "annotator": "Hainiu",
        "steps": [
            [
                {
                    "step": "Start."
                }
            ],
            [
                {
                    "type": "step",
                    "step": "Find your local visa application center."
                }
            ],
            [
                {
                    "type": "step",
                    "step": "Make an appointment."
                }
            ],
            [
                {
                    "type": "step",
                    "step": "Prepare material."
                },
                {
                    "type": "entity",
                    "entity": "material",
                    "attribute": "prepared",
                    "change": "more likely"
                },
                {
                    "type": "predicted_entity",
                    "entity": "material",
                    "attribute": "prepared",
                    "change": "True"
                }
            ],
            [
                {
                    "type": "step",
                    "step": "Go to your application appointment."
                },
                {
                    "type": "entity",
                    "entity": "you",
                    "attribute": "at the application center",
                    "change": "more likely"
                },
                {
                    "type": "event",
                    "event": "You hear a knock on your door.",
                    "change": "less likely"
                },
                {
                    "type": "entity",
                    "entity": "material",
                    "attribute": "at the application center",
                    "change": "more likely"
                },
                {
                    "type": "event",
                    "event": "The visa officer receives your materials.",
                    "change": "more likely"
                },
                {
                    "type": "predicted_entity",
                    "entity": "you",
                    "attribute": "at_application_center",
                    "change": "True"
                },
                {
                    "type": "predicted_entity",
                    "entity": "material",
                    "attribute": "at_application_center",
                    "change": "True"
                },
                {
                    "type": "predicted_event",
                    "event": "The visa officer receives your materials.",
                    "change": "more likely"
                }
            ],
            [
                {
                    "type": "step",
                    "step": "Go home and receive your visa by mail."
                },
                {
                    "type": "entity",
                    "entity": "you",
                    "attribute": "at the application center",
                    "change": "less likely"
                },
                {
                    "type": "event",
                    "event": "You hear a knock on your door.",
                    "change": "more likely"
                },
                {
                    "type": "entity",
                    "entity": "you",
                    "attribute": "have a UK visa",
                    "change": "more likely"
                },
                {
                    "type": "event",
                    "event": "You travel to UK.",
                    "change": "more likely"
                },
                {
                    "type": "predicted_entity",
                    "entity": "you",
                    "attribute": "at_application_center",
                    "change": "False"
                },
                {
                    "type": "predicted_entity",
                    "entity": "you",
                    "attribute": "have_UK_visa",
                    "change": "True"
                },
                {
                    "type": "predicted_event",
                    "event": "You hear a knock on your door.",
                    "change": "more likely"
                },
                {
                    "type": "predicted_event",
                    "event": "You travel to UK.",
                    "change": "more likely"
                }
            ]
        ]
    },
    "55": {
        "goal": "Clean baked on grease off glass dishes",
        "annotator": "Hainiu",
        "steps": [
            [
                {
                    "step": "Start."
                }
            ],
            [
                {
                    "type": "step",
                    "step": "Fill the bottom of the dish with warm water."
                },
                {
                    "type": "entity",
                    "entity": "the glassware",
                    "attribute": "wet",
                    "change": "more likely"
                },
                {
                    "type": "event",
                    "event": "Dropping the glassware makes the floor wet.",
                    "change": "more likely"
                },
                {
                    "type": "predicted_entity",
                    "entity": "glassware",
                    "attribute": "wet",
                    "change": "True"
                },
                {
                    "type": "predicted_event",
                    "event": "Dropping the glassware makes the floor wet.",
                    "change": "more likely"
                }
            ],
            [
                {
                    "type": "step",
                    "step": "Pour a pea-sized amount of dish soap into the water."
                }
            ],
            [
                {
                    "type": "step",
                    "step": "Place 1 dryer sheet into the glass dish."
                }
            ],
            [
                {
                    "type": "step",
                    "step": "Leave the sheet in the glassware for at least 10 minutes. "
                }
            ],
            [
                {
                    "type": "step",
                    "step": "Wipe off the baked on grease with a sponge and dry. "
                },
                {
                    "type": "entity",
                    "entity": "the glassware",
                    "attribute": "clean",
                    "change": "more likely"
                },
                {
                    "type": "event",
                    "event": "The glassware looks like new.",
                    "change": "more likely"
                },
                {
                    "type": "entity",
                    "entity": "the glassware",
                    "attribute": "wet",
                    "change": "less likely"
                },
                {
                    "type": "event",
                    "event": "Dropping the glassware makes the floor wet.",
                    "change": "less likely"
                },
                {
                    "type": "predicted_entity",
                    "entity": "glassware",
                    "attribute": "clean",
                    "change": "True"
                },
                {
                    "type": "predicted_entity",
                    "entity": "glassware",
                    "attribute": "wet",
                    "change": "False"
                },
                {
                    "type": "predicted_event",
                    "event": "Dropping the glassware makes the floor wet.",
                    "change": "less likely"
                },
                {
                    "type": "predicted_event",
                    "event": "The glassware looks like new.",
                    "change": "more likely"
                }
            ]
        ]
    },
    "56": {
        "goal": "Prepare a custartd ice cream base",
        "annotator": "Hainiu",
        "steps": [
            [
                {
                    "step": "Start."
                }
            ],
            [
                {
                    "type": "step",
                    "step": "Simmer the milk."
                },
                {
                    "type": "entity",
                    "entity": "milk",
                    "attribute": "hot",
                    "change": "more likely"
                },
                {
                    "type": "event",
                    "event": "I drink the milk and burn my tongue.",
                    "change": "more likely"
                },
                {
                    "type": "predicted_entity",
                    "entity": "milk",
                    "attribute": "hot",
                    "change": "True"
                },
                {
                    "type": "predicted_event",
                    "event": "I drink the milk and burn my tongue.",
                    "change": "more likely"
                }
            ],
            [
                {
                    "type": "step",
                    "step": "Combine the eggs, sugar, and salt."
                },
                {
                    "type": "predicted_entity",
                    "entity": "mixture",
                    "attribute": "wet",
                    "change": "True"
                }
            ],
            [
                {
                    "type": "step",
                    "step": "Cool the milk and add it to the egg mixture."
                },
                {
                    "type": "entity",
                    "entity": "milk",
                    "attribute": "hot",
                    "change": "less likely"
                },
                {
                    "type": "event",
                    "event": "I drink the milk and burn my tongue.",
                    "change": "less likely"
                },
                {
                    "type": "predicted_entity",
                    "entity": "milk",
                    "attribute": "hot",
                    "change": "False"
                },
                {
                    "type": "predicted_entity",
                    "entity": "mixture",
                    "attribute": "wet",
                    "change": "True"
                },
                {
                    "type": "predicted_event",
                    "event": "I drink the milk and burn my tongue.",
                    "change": "less likely"
                }
            ],
            [
                {
                    "type": "step",
                    "step": "Transfer the mixture to a pot and heat it until it reaches 170 degrees."
                },
                {
                    "type": "entity",
                    "entity": "the mixture",
                    "attribute": "hard",
                    "change": "more likely"
                },
                {
                    "type": "event",
                    "event": "The mixture can be flaked with a fork.",
                    "change": "more likely"
                },
                {
                    "type": "entity",
                    "entity": "the mixture",
                    "attribute": "hot",
                    "change": "more likely"
                },
                {
                    "type": "event",
                    "event": "The is smoke above the mixture.",
                    "change": "more likely"
                },
                {
                    "type": "predicted_entity",
                    "entity": "mixture",
                    "attribute": "hard",
                    "change": "True"
                },
                {
                    "type": "predicted_entity",
                    "entity": "mixture",
                    "attribute": "hot",
                    "change": "True"
                },
                {
                    "type": "predicted_event",
                    "event": "The mixture can be flaked with a fork.",
                    "change": "more likely"
                },
                {
                    "type": "predicted_event",
                    "event": "The is smoke above the mixture.",
                    "change": "more likely"
                }
            ],
            [
                {
                    "type": "step",
                    "step": "Strain the mixture over an ice bath and add vanilla."
                },
                {
                    "type": "entity",
                    "entity": "the mixture",
                    "attribute": "hot",
                    "change": "less likely"
                },
                {
                    "type": "event",
                    "event": "The is smoke above the mixture.",
                    "change": "less likely"
                },
                {
                    "type": "predicted_entity",
                    "entity": "mixture",
                    "attribute": "hot",
                    "change": "False"
                },
                {
                    "type": "predicted_event",
                    "event": "The is smoke above the mixture.",
                    "change": "less likely"
                }
            ],
            [
                {
                    "type": "step",
                    "step": "Chill the mixture for a half hour. "
                },
                {
                    "type": "predicted_entity",
                    "entity": "mixture",
                    "attribute": "hard",
                    "change": "False"
                },
                {
                    "type": "predicted_event",
                    "event": "The mixture can be flaked with a fork.",
                    "change": "less likely"
                }
            ]
        ]
    },
    "58": {
        "goal": "Fold a shirt",
        "annotator": "Hainiu",
        "steps": [
            [
                {
                    "step": "Start."
                }
            ],
            [
                {
                    "type": "step",
                    "step": "Lay the shirt face down on a flat surface. "
                }
            ],
            [
                {
                    "type": "step",
                    "step": "Smooth the fabric out to remove any wrinkles on it. "
                }
            ],
            [
                {
                    "type": "step",
                    "step": "Fold the shirt sideways into thirds to bring the sleeves in."
                },
                {
                    "type": "entity",
                    "entity": "shirt",
                    "attribute": "reduced in size",
                    "change": "more likely"
                },
                {
                    "type": "event",
                    "event": "The shirt takes up less space in my wardrobe.",
                    "change": "more likely"
                },
                {
                    "type": "predicted_entity",
                    "entity": "shirt",
                    "attribute": "reduced_in_size",
                    "change": "True"
                },
                {
                    "type": "predicted_event",
                    "event": "The shirt takes up less space in my wardrobe.",
                    "change": "more likely"
                }
            ],
            [
                {
                    "type": "step",
                    "step": "Fold the sleeves back in if they don't lay neatly over the fabric. "
                },
                {
                    "type": "entity",
                    "entity": "shirt",
                    "attribute": "reduced in size",
                    "change": "more likely"
                },
                {
                    "type": "event",
                    "event": "The shirt takes up less space in my wardrobe.",
                    "change": "more likely"
                },
                {
                    "type": "predicted_entity",
                    "entity": "shirt",
                    "attribute": "reduced_in_size",
                    "change": "True"
                },
                {
                    "type": "predicted_event",
                    "event": "The shirt takes up less space in my wardrobe.",
                    "change": "more likely"
                }
            ],
            [
                {
                    "type": "step",
                    "step": "Fold the shirt in half from the bottom up. "
                },
                {
                    "type": "entity",
                    "entity": "shirt",
                    "attribute": "reduced in size",
                    "change": "more likely"
                },
                {
                    "type": "event",
                    "event": "The shirt takes up less space in my wardrobe.",
                    "change": "more likely"
                },
                {
                    "type": "predicted_entity",
                    "entity": "shirt",
                    "attribute": "reduced_in_size",
                    "change": "True"
                },
                {
                    "type": "predicted_event",
                    "event": "The shirt takes up less space in my wardrobe.",
                    "change": "more likely"
                }
            ],
            [
                {
                    "type": "step",
                    "step": "Repeat folding the shirt in half to reduce its size. "
                },
                {
                    "type": "entity",
                    "entity": "shirt",
                    "attribute": "reduced in size",
                    "change": "more likely"
                },
                {
                    "type": "event",
                    "event": "The shirt takes up less space in my wardrobe.",
                    "change": "more likely"
                },
                {
                    "type": "predicted_entity",
                    "entity": "shirt",
                    "attribute": "reduced_in_size",
                    "change": "True"
                },
                {
                    "type": "predicted_event",
                    "event": "The shirt takes up less space in my wardrobe.",
                    "change": "more likely"
                }
            ]
        ]
    }
}
