# Supplementary material
Source: ML conference proceedings conference paper supplement (https://aclanthology.org/2023.findings-eacl.31)
Supplement: dataset [file 2023.findings-eacl.31.dataset.zip › causal_reasoning_of_entities_and_events/gpt3.5/README.md]

GPT-3.5 (text-davinci-003) 

To run, use

```
python openai_models --data_path [path to CREPE dataset] --key [path to OpenAI API key]
```

After running, script will save a file in the `results` folder with name `gpt3_result_dict.pkl` which contains GPT-3 results stored as list of dictionaries. 

In addition, a confusion matrix named `conf_mtx.png` will be saved to the same folder.

---

Performance:

Development Set: __0.424__ (macro f1)

Testing Set: __0.423__ (macro f1)
