# Supplementary material
Source: ML conference proceedings conference paper supplement (https://aclanthology.org/2023.findings-eacl.31)
Supplement: dataset [file 2023.findings-eacl.31.dataset.zip › causal_reasoning_of_entities_and_events/gpt3/CoT/README.md]

To run GPT3 with CoT, do
```
python cot.py --n_shots [number of shots] --cot [whether to use cot or plain prompt] --seed [set seed to control randomness] --dataset [choose from "dev" or "test"]
```
