# Supplementary material
Source: ML conference proceedings conference paper supplement (https://aclanthology.org/2023.findings-eacl.31)
Supplement: dataset [file 2023.findings-eacl.31.dataset.zip › causal_reasoning_of_entities_and_events/gpt3/legacy_trials/harry1.0/prompts/1hop_0hop.txt]

Goal: Wash Hands

I am interested in the following events:
"I can safely touch a light switch."
"Water streaming sound can be heard."

I turn on the tap water. After this, the water is on, so
"I can safely touch a light switch." is equally like to happen.
"Water streaming sound can be heard." is more likely to happen.

I put hands under running water. After this, the hands are wet, so
"I can safely touch a light switch." is less likely to happen.
"Water streaming sound can be heard." is equally likely to happen.

I apply soap and rub hands. After this,
"I can safely touch a light switch." is equally likely to happen.
"Water streaming sound can be heard." is equally likely to happen.

I turn off the tap water. After this, the water is not on, so
"I can safely touch a light switch." is equally likely to happen.
"Water streaming sound can be heard." is less likely to happen.

I dry my hands using a towel. After this, the hands are not wet, so
"I can safely touch a light switch." is more likely to happen.
"Water streaming sound can be heard." is equally likely to happen.


Goal: Change Battery of TV Remote Control

I am interested in the following events:
"I can see inside the battery compartment."
"The remote can turn on a TV."

I pop open the battery cover. After this, the battery cover is removed, so
"I can see inside the battery compartment." is more like to happen.
"The remote can turn on a TV." is equally likely to happen.

I take out the old batteries. After this, the remote does not have battery, so
"I can see inside the battery compartment." is equally likely to happen.
"The remote can turn on a TV." is less likely to happen.

I put in the new batteries. After this, the remote has battery, so
"I can see inside the battery compartment." is equally likely to happen.
"The remote can turn on a TV." is more likely to happen.

I close the battery cover. After this, the battery cover is not removed, so
"I can see inside the battery compartment." is less likely to happen.
"The remote can turn on a TV." is equally likely to happen.
