# Supplementary material
Source: ML conference proceedings conference paper supplement (https://aclanthology.org/2023.findings-eacl.31)
Supplement: dataset [file 2023.findings-eacl.31.dataset.zip › causal_reasoning_of_entities_and_events/gpt3/legacy_trials/harry1.0/prompts/1hop_only.txt]

Goal: Wash Hands

I am interested in the following events:
"I can safely touch a light switch."
"Water streaming sound can be heard."

I turn on the tap water. After this,
"I can safely touch a light switch." is equally like to happen.
"Water streaming sound can be heard." is more likely to happen.

I put hands under running water. After this,
"I can safely touch a light switch." is less likely to happen.
"Water streaming sound can be heard." is equally likely to happen.

I apply soap and rub hands. After this,
"I can safely touch a light switch." is equally likely to happen.
"Water streaming sound can be heard." is equally likely to happen.

I turn off the tap water. After this,
"I can safely touch a light switch." is equally likely to happen.
"Water streaming sound can be heard." is less likely to happen.

I dry my hands using a towel. After this,
"I can safely touch a light switch." is more likely to happen.
"Water streaming sound can be heard." is equally likely to happen.


Goal: Change Battery of TV Remote Control

I am interested in the following events:
"I can see inside the battery compartment."
"The remote can turn on a TV."

I pop open the battery cover. After this,
"I can see inside the battery compartment." is more like to happen.
"The remote can turn on a TV." is equally likely to happen.

I take out the old batteries. After this,
"I can see inside the battery compartment." is equally likely to happen.
"The remote can turn on a TV." is less likely to happen.

I put in the new batteries. After this,
"I can see inside the battery compartment." is equally likely to happen.
"The remote can turn on a TV." is more likely to happen.

I close the battery cover. After this,
"I can see inside the battery compartment." is less likely to happen.
"The remote can turn on a TV." is equally likely to happen.
