# Supplementary material
Source: ML conference proceedings conference paper supplement (https://aclanthology.org/2023.findings-eacl.31)
Supplement: dataset [file 2023.findings-eacl.31.dataset.zip › causal_reasoning_of_entities_and_events/gpt3/legacy_trials/harry1.0/README.md]

1: 0.3F1, .19P, .74R
0+1: Precision: 0.17049180327868851
Recall: 0.7222222222222222
F1: 0.27586206896551724
