# Supplementary material
Source: ML conference proceedings conference paper supplement (https://aclanthology.org/2023.findings-eacl.31)
Supplement: dataset [file 2023.findings-eacl.31.dataset.zip › causal_reasoning_of_entities_and_events/gpt3/legacy_trials/weiqiu1.0/0hop-pred-test.json]

{
    "1": {
        "goal": "Clean up kitchen counter",
        "annotator": "Hengyan Tao",
        "steps": [
            [
                {
                    "step": "Start."
                }
            ],
            [
                {
                    "type": "step",
                    "step": "Wear rubber gloves."
                },
                {
                    "type": "openpi_entity_gpt3",
                    "entity": "rubber gloves",
                    "attribute": "on the hands",
                    "change": "more likely"
                },
                {
                    "type": "openpi_entity_gpt3",
                    "entity": "rubber gloves",
                    "attribute": "in the drawer",
                    "change": "less likely"
                },
                {
                    "type": "openpi_entity_gpt3",
                    "entity": "hands",
                    "attribute": "covered",
                    "change": "more likely"
                },
                {
                    "type": "openpi_entity_gpt3",
                    "entity": "hands",
                    "attribute": "bare",
                    "change": "less likely"
                },
                {
                    "type": "openpi_entity_gpt3",
                    "entity": "rubber gloves",
                    "attribute": "on hands",
                    "change": "more likely"
                },
                {
                    "type": "openpi_entity_gpt3",
                    "entity": "rubber gloves",
                    "attribute": "in drawer",
                    "change": "less likely"
                }
            ],
            [
                {
                    "type": "step",
                    "step": "Get towels and wipes."
                },
                {
                    "type": "openpi_entity_gpt3",
                    "entity": "towels",
                    "attribute": "on the table",
                    "change": "more likely"
                },
                {
                    "type": "openpi_entity_gpt3",
                    "entity": "towels",
                    "attribute": "in the linen closet",
                    "change": "less likely"
                },
                {
                    "type": "openpi_entity_gpt3",
                    "entity": "wipes",
                    "attribute": "on the table",
                    "change": "more likely"
                },
                {
                    "type": "openpi_entity_gpt3",
                    "entity": "wipes",
                    "attribute": "in the linen closet",
                    "change": "less likely"
                }
            ],
            [
                {
                    "type": "step",
                    "step": "Use wipes to wipe kitchen counter."
                },
                {
                    "type": "entity",
                    "entity": "the Chef",
                    "attribute": "use the counter",
                    "change": "less likely"
                },
                {
                    "type": "openpi_entity_gpt3",
                    "entity": "counter",
                    "attribute": "clean",
                    "change": "more likely"
                },
                {
                    "type": "openpi_entity_gpt3",
                    "entity": "counter",
                    "attribute": "dirty",
                    "change": "less likely"
                },
                {
                    "type": "openpi_entity_gpt3",
                    "entity": "wipes",
                    "attribute": "on the counter",
                    "change": "more likely"
                },
                {
                    "type": "openpi_entity_gpt3",
                    "entity": "wipes",
                    "attribute": "in the drawer",
                    "change": "less likely"
                },
                {
                    "type": "openpi_entity_gpt3",
                    "entity": "counter",
                    "attribute": "wet",
                    "change": "more likely"
                },
                {
                    "type": "openpi_entity_gpt3",
                    "entity": "counter",
                    "attribute": "dry",
                    "change": "less likely"
                },
                {
                    "type": "openpi_entity_gpt3",
                    "entity": "wipes",
                    "attribute": "on counter",
                    "change": "more likely"
                },
                {
                    "type": "openpi_entity_gpt3",
                    "entity": "wipes",
                    "attribute": "in drawer",
                    "change": "less likely"
                }
            ],
            [
                {
                    "type": "step",
                    "step": "Use towels to clean kitchen counter."
                },
                {
                    "type": "entity",
                    "entity": "the kitchen counter",
                    "attribute": "cleaned",
                    "change": "more likely"
                },
                {
                    "type": "openpi_entity_gpt3",
                    "entity": "towels",
                    "attribute": "on counter",
                    "change": "more likely"
                },
                {
                    "type": "openpi_entity_gpt3",
                    "entity": "towels",
                    "attribute": "in drawer",
                    "change": "less likely"
                },
                {
                    "type": "openpi_entity_gpt3",
                    "entity": "counter",
                    "attribute": "clean",
                    "change": "more likely"
                },
                {
                    "type": "openpi_entity_gpt3",
                    "entity": "counter",
                    "attribute": "dirty",
                    "change": "less likely"
                },
                {
                    "type": "openpi_entity_gpt3",
                    "entity": "wipes",
                    "attribute": "on counter",
                    "change": "more likely"
                },
                {
                    "type": "openpi_entity_gpt3",
                    "entity": "wipes",
                    "attribute": "in drawer",
                    "change": "less likely"
                }
            ],
            [
                {
                    "type": "step",
                    "step": "Let kitchen counter dry."
                },
                {
                    "type": "entity",
                    "entity": "the Chef",
                    "attribute": "use the counter",
                    "change": "more likely"
                },
                {
                    "type": "openpi_entity_gpt3",
                    "entity": "towels",
                    "attribute": "on the kitchen counter",
                    "change": "more likely"
                },
                {
                    "type": "openpi_entity_gpt3",
                    "entity": "towels",
                    "attribute": "on the table",
                    "change": "less likely"
                },
                {
                    "type": "openpi_entity_gpt3",
                    "entity": "towels",
                    "attribute": "on the kitchen counter",
                    "change": "more likely"
                },
                {
                    "type": "openpi_entity_gpt3",
                    "entity": "towels",
                    "attribute": "in the closet",
                    "change": "less likely"
                },
                {
                    "type": "openpi_entity_gpt3",
                    "entity": "kitchen counter",
                    "attribute": "dry",
                    "change": "more likely"
                },
                {
                    "type": "openpi_entity_gpt3",
                    "entity": "kitchen counter",
                    "attribute": "wet",
                    "change": "less likely"
                },
                {
                    "type": "openpi_entity_gpt3",
                    "entity": "kitchen counter",
                    "attribute": "dry",
                    "change": "more likely"
                },
                {
                    "type": "openpi_entity_gpt3",
                    "entity": "kitchen counter",
                    "attribute": "wet",
                    "change": "less likely"
                },
                {
                    "type": "openpi_entity_gpt3",
                    "entity": "kitchen counter",
                    "attribute": "dry",
                    "change": "more likely"
                },
                {
                    "type": "openpi_entity_gpt3",
                    "entity": "kitchen counter",
                    "attribute": "wet",
                    "change": "less likely"
                }
            ]
        ]
    },
    "2": {
        "goal": "Write an essay",
        "annotator": "Hengyan Tao",
        "steps": [
            [
                {
                    "step": "Start."
                }
            ],
            [
                {
                    "type": "step",
                    "step": "Have an idea on what topic about the essay."
                },
                {
                    "type": "openpi_entity_gpt3",
                    "entity": "topic",
                    "attribute": "selected",
                    "change": "more likely"
                },
                {
                    "type": "openpi_entity_gpt3",
                    "entity": "topic",
                    "attribute": "unselected",
                    "change": "less likely"
                },
                {
                    "type": "openpi_entity_gpt3",
                    "entity": "topic",
                    "attribute": "known",
                    "change": "more likely"
                },
                {
                    "type": "openpi_entity_gpt3",
                    "entity": "topic",
                    "attribute": "unknown",
                    "change": "less likely"
                }
            ],
            [
                {
                    "type": "step",
                    "step": "Have an outline of the essay."
                },
                {
                    "type": "openpi_entity_gpt3",
                    "entity": "essay",
                    "attribute": "written",
                    "change": "more likely"
                },
                {
                    "type": "openpi_entity_gpt3",
                    "entity": "essay",
                    "attribute": "unstructured",
                    "change": "less likely"
                },
                {
                    "type": "openpi_entity_gpt3",
                    "entity": "outline",
                    "attribute": "created",
                    "change": "more likely"
                },
                {
                    "type": "openpi_entity_gpt3",
                    "entity": "outline",
                    "attribute": "absent",
                    "change": "less likely"
                },
                {
                    "type": "openpi_entity_gpt3",
                    "entity": "outline",
                    "attribute": "complete",
                    "change": "more likely"
                },
                {
                    "type": "openpi_entity_gpt3",
                    "entity": "outline",
                    "attribute": "incomplete",
                    "change": "less likely"
                },
                {
                    "type": "openpi_entity_gpt3",
                    "entity": "outline",
                    "attribute": "made",
                    "change": "more likely"
                },
                {
                    "type": "openpi_entity_gpt3",
                    "entity": "outline",
                    "attribute": "unmade",
                    "change": "less likely"
                }
            ],
            [
                {
                    "type": "step",
                    "step": "Follow the outline and expand each section."
                },
                {
                    "type": "openpi_entity_gpt3",
                    "entity": "each section",
                    "attribute": "expanded",
                    "change": "more likely"
                },
                {
                    "type": "openpi_entity_gpt3",
                    "entity": "each section",
                    "attribute": "unexpanded",
                    "change": "less likely"
                },
                {
                    "type": "openpi_entity_gpt3",
                    "entity": "each section",
                    "attribute": "followed",
                    "change": "more likely"
                },
                {
                    "type": "openpi_entity_gpt3",
                    "entity": "each section",
                    "attribute": "unfollowed",
                    "change": "less likely"
                },
                {
                    "type": "openpi_entity_gpt3",
                    "entity": "paragraphs",
                    "attribute": "expanded",
                    "change": "more likely"
                },
                {
                    "type": "openpi_entity_gpt3",
                    "entity": "paragraphs",
                    "attribute": "unstructured",
                    "change": "less likely"
                },
                {
                    "type": "openpi_entity_gpt3",
                    "entity": "outline",
                    "attribute": "followed",
                    "change": "more likely"
                },
                {
                    "type": "openpi_entity_gpt3",
                    "entity": "outline",
                    "attribute": "absent",
                    "change": "less likely"
                },
                {
                    "type": "openpi_entity_gpt3",
                    "entity": "paragraphs",
                    "attribute": "structured",
                    "change": "more likely"
                },
                {
                    "type": "openpi_entity_gpt3",
                    "entity": "paragraphs",
                    "attribute": "unstructured",
                    "change": "less likely"
                }
            ],
            [
                {
                    "type": "step",
                    "step": "Read the draft essay and refine each section."
                },
                {
                    "type": "openpi_entity_gpt3",
                    "entity": "draft",
                    "attribute": "written",
                    "change": "more likely"
                },
                {
                    "type": "openpi_entity_gpt3",
                    "entity": "draft",
                    "attribute": "unwritten",
                    "change": "less likely"
                },
                {
                    "type": "openpi_entity_gpt3",
                    "entity": "essay",
                    "attribute": "read",
                    "change": "more likely"
                },
                {
                    "type": "openpi_entity_gpt3",
                    "entity": "essay",
                    "attribute": "unwritten",
                    "change": "less likely"
                },
                {
                    "type": "openpi_entity_gpt3",
                    "entity": "essay",
                    "attribute": "written",
                    "change": "more likely"
                },
                {
                    "type": "openpi_entity_gpt3",
                    "entity": "essay",
                    "attribute": "unwritten",
                    "change": "less likely"
                }
            ],
            [
                {
                    "type": "step",
                    "step": "Submit the essay if needed."
                },
                {
                    "type": "entity",
                    "entity": "the essay",
                    "attribute": "finished",
                    "change": "more likely"
                },
                {
                    "type": "openpi_entity_gpt3",
                    "entity": "essay",
                    "attribute": "needed",
                    "change": "more likely"
                },
                {
                    "type": "openpi_entity_gpt3",
                    "entity": "essay",
                    "attribute": "unneeded",
                    "change": "less likely"
                },
                {
                    "type": "openpi_entity_gpt3",
                    "entity": "essay",
                    "attribute": "reviewed",
                    "change": "more likely"
                },
                {
                    "type": "openpi_entity_gpt3",
                    "entity": "essay",
                    "attribute": "unreviewed",
                    "change": "less likely"
                },
                {
                    "type": "openpi_entity_gpt3",
                    "entity": "essay",
                    "attribute": "submitted",
                    "change": "more likely"
                },
                {
                    "type": "openpi_entity_gpt3",
                    "entity": "essay",
                    "attribute": "unreviewed",
                    "change": "less likely"
                },
                {
                    "type": "openpi_entity_gpt3",
                    "entity": "essay",
                    "attribute": "approved",
                    "change": "more likely"
                },
                {
                    "type": "openpi_entity_gpt3",
                    "entity": "essay",
                    "attribute": "unapproved",
                    "change": "less likely"
                }
            ]
        ]
    },
    "3": {
        "goal": "Apply for a chess tournament",
        "annotator": "Hengyan Tao",
        "steps": [
            [
                {
                    "step": "Start."
                }
            ],
            [
                {
                    "type": "step",
                    "step": "Check chessaction.com to see what tournaments available."
                },
                {
                    "type": "openpi_entity_gpt3",
                    "entity": "tournaments",
                    "attribute": "selected",
                    "change": "more likely"
                },
                {
                    "type": "openpi_entity_gpt3",
                    "entity": "tournaments",
                    "attribute": "unselected",
                    "change": "less likely"
                },
                {
                    "type": "openpi_entity_gpt3",
                    "entity": "chess action website",
                    "attribute": "visited",
                    "change": "more likely"
                },
                {
                    "type": "openpi_entity_gpt3",
                    "entity": "chess action website",
                    "attribute": "unvisited",
                    "change": "less likely"
                },
                {
                    "type": "openpi_entity_gpt3",
                    "entity": "tournaments",
                    "attribute": "checked",
                    "change": "more likely"
                },
                {
                    "type": "openpi_entity_gpt3",
                    "entity": "tournaments",
                    "attribute": "unchecked",
                    "change": "less likely"
                },
                {
                    "type": "openpi_entity_gpt3",
                    "entity": "chess action website",
                    "attribute": "checked",
                    "change": "more likely"
                },
                {
                    "type": "openpi_entity_gpt3",
                    "entity": "chess action website",
                    "attribute": "unchecked",
                    "change": "less likely"
                }
            ],
            [
                {
                    "type": "step",
                    "step": "Check if you can make any of the available dates."
                },
                {
                    "type": "openpi_entity_gpt3",
                    "entity": "dates",
                    "attribute": "available",
                    "change": "more likely"
                },
                {
                    "type": "openpi_entity_gpt3",
                    "entity": "dates",
                    "attribute": "unavailable",
                    "change": "less likely"
                },
                {
                    "type": "openpi_entity_gpt3",
                    "entity": "dates",
                    "attribute": "checked",
                    "change": "more likely"
                },
                {
                    "type": "openpi_entity_gpt3",
                    "entity": "dates",
                    "attribute": "unchecked",
                    "change": "less likely"
                }
            ],
            [
                {
                    "type": "step",
                    "step": "Choose the dates you can make and follow the procedure to apply."
                },
                {
                    "type": "openpi_entity_gpt3",
                    "entity": "application",
                    "attribute": "processed",
                    "change": "more likely"
                },
                {
                    "type": "openpi_entity_gpt3",
                    "entity": "application",
                    "attribute": "unprocessed",
                    "change": "less likely"
                },
                {
                    "type": "openpi_entity_gpt3",
                    "entity": "application",
                    "attribute": "complete",
                    "change": "more likely"
                },
                {
                    "type": "openpi_entity_gpt3",
                    "entity": "application",
                    "attribute": "incomplete",
                    "change": "less likely"
                },
                {
                    "type": "openpi_entity_gpt3",
                    "entity": "dates",
                    "attribute": "selected",
                    "change": "more likely"
                },
                {
                    "type": "openpi_entity_gpt3",
                    "entity": "dates",
                    "attribute": "unselected",
                    "change": "less likely"
                }
            ],
            [
                {
                    "type": "step",
                    "step": "Receive the confirmation email that the application is successfully."
                },
                {
                    "type": "entity",
                    "entity": "the application",
                    "attribute": "finished successfully",
                    "change": "more likely"
                },
                {
                    "type": "openpi_entity_gpt3",
                    "entity": "application",
                    "attribute": "accepted",
                    "change": "more likely"
                },
                {
                    "type": "openpi_entity_gpt3",
                    "entity": "application",
                    "attribute": "considered",
                    "change": "less likely"
                },
                {
                    "type": "openpi_entity_gpt3",
                    "entity": "email",
                    "attribute": "confirmed",
                    "change": "more likely"
                },
                {
                    "type": "openpi_entity_gpt3",
                    "entity": "email",
                    "attribute": "unconfirmed",
                    "change": "less likely"
                },
                {
                    "type": "openpi_entity_gpt3",
                    "entity": "email",
                    "attribute": "opened",
                    "change": "more likely"
                },
                {
                    "type": "openpi_entity_gpt3",
                    "entity": "email",
                    "attribute": "unopened",
                    "change": "less likely"
                }
            ]
        ]
    },
    "4": {
        "goal": "Mow the lawn",
        "annotator": "Hengyan Tao",
        "steps": [
            [
                {
                    "step": "Start."
                }
            ],
            [
                {
                    "type": "step",
                    "step": "Set up lawn mower."
                },
                {
                    "type": "openpi_entity_gpt3",
                    "entity": "lawn mower",
                    "attribute": "plugged in",
                    "change": "more likely"
                },
                {
                    "type": "openpi_entity_gpt3",
                    "entity": "lawn mower",
                    "attribute": "unplugged",
                    "change": "less likely"
                },
                {
                    "type": "openpi_entity_gpt3",
                    "entity": "lawn mower",
                    "attribute": "set up",
                    "change": "more likely"
                },
                {
                    "type": "openpi_entity_gpt3",
                    "entity": "lawn mower",
                    "attribute": "unset up",
                    "change": "less likely"
                },
                {
                    "type": "openpi_entity_gpt3",
                    "entity": "lawn mower",
                    "attribute": "started",
                    "change": "more likely"
                },
                {
                    "type": "openpi_entity_gpt3",
                    "entity": "lawn mower",
                    "attribute": "unstarted",
                    "change": "less likely"
                },
                {
                    "type": "openpi_entity_gpt3",
                    "entity": "plug",
                    "attribute": "in the socket",
                    "change": "more likely"
                },
                {
                    "type": "openpi_entity_gpt3",
                    "entity": "plug",
                    "attribute": "in the ground",
                    "change": "less likely"
                },
                {
                    "type": "openpi_entity_gpt3",
                    "entity": "lawn mower",
                    "attribute": "turned on",
                    "change": "more likely"
                },
                {
                    "type": "openpi_entity_gpt3",
                    "entity": "lawn mower",
                    "attribute": "turned off",
                    "change": "less likely"
                }
            ],
            [
                {
                    "type": "step",
                    "step": "Do the mowing."
                },
                {
                    "type": "entity",
                    "entity": "the lawn",
                    "attribute": "been mowed",
                    "change": "more likely"
                },
                {
                    "type": "openpi_entity_gpt3",
                    "entity": "lawn",
                    "attribute": "mowed",
                    "change": "more likely"
                },
                {
                    "type": "openpi_entity_gpt3",
                    "entity": "lawn",
                    "attribute": "uncut",
                    "change": "less likely"
                },
                {
                    "type": "openpi_entity_gpt3",
                    "entity": "grass",
                    "attribute": "cut",
                    "change": "more likely"
                },
                {
                    "type": "openpi_entity_gpt3",
                    "entity": "grass",
                    "attribute": "uncut",
                    "change": "less likely"
                },
                {
                    "type": "openpi_entity_gpt3",
                    "entity": "lawn",
                    "attribute": "cut",
                    "change": "more likely"
                },
                {
                    "type": "openpi_entity_gpt3",
                    "entity": "lawn",
                    "attribute": "uncut",
                    "change": "less likely"
                }
            ],
            [
                {
                    "type": "step",
                    "step": "Finish Mowing."
                },
                {
                    "type": "openpi_entity_gpt3",
                    "entity": "lawn",
                    "attribute": "mowed",
                    "change": "more likely"
                },
                {
                    "type": "openpi_entity_gpt3",
                    "entity": "lawn",
                    "attribute": "unmowed",
                    "change": "less likely"
                }
            ]
        ]
    },
    "5": {
        "goal": "Heat pancake",
        "annotator": "Hengyan Tao",
        "steps": [
            [
                {
                    "step": "Start."
                }
            ],
            [
                {
                    "type": "step",
                    "step": "Take pancake from refrigerator."
                },
                {
                    "type": "openpi_entity_gpt3",
                    "entity": "pancake",
                    "attribute": "on plate",
                    "change": "more likely"
                },
                {
                    "type": "openpi_entity_gpt3",
                    "entity": "pancake",
                    "attribute": "in fridge",
                    "change": "less likely"
                },
                {
                    "type": "openpi_entity_gpt3",
                    "entity": "plate",
                    "attribute": "on the table",
                    "change": "more likely"
                },
                {
                    "type": "openpi_entity_gpt3",
                    "entity": "plate",
                    "attribute": "in the cupboard",
                    "change": "less likely"
                },
                {
                    "type": "openpi_entity_gpt3",
                    "entity": "plate",
                    "attribute": "on the counter",
                    "change": "more likely"
                },
                {
                    "type": "openpi_entity_gpt3",
                    "entity": "plate",
                    "attribute": "in the cupboard",
                    "change": "less likely"
                },
                {
                    "type": "openpi_entity_gpt3",
                    "entity": "plate",
                    "attribute": "on the counter",
                    "change": "more likely"
                },
                {
                    "type": "openpi_entity_gpt3",
                    "entity": "plate",
                    "attribute": "in cupboard",
                    "change": "less likely"
                }
            ],
            [
                {
                    "type": "step",
                    "step": "Put pancake in microwave."
                },
                {
                    "type": "openpi_entity_gpt3",
                    "entity": "pancake",
                    "attribute": "heated",
                    "change": "more likely"
                },
                {
                    "type": "openpi_entity_gpt3",
                    "entity": "pancake",
                    "attribute": "room temperature",
                    "change": "less likely"
                },
                {
                    "type": "openpi_entity_gpt3",
                    "entity": "pancake",
                    "attribute": "in microwave",
                    "change": "more likely"
                },
                {
                    "type": "openpi_entity_gpt3",
                    "entity": "pancake",
                    "attribute": "in container",
                    "change": "less likely"
                },
                {
                    "type": "openpi_entity_gpt3",
                    "entity": "microwave",
                    "attribute": "on",
                    "change": "more likely"
                },
                {
                    "type": "openpi_entity_gpt3",
                    "entity": "microwave",
                    "attribute": "off",
                    "change": "less likely"
                },
                {
                    "type": "openpi_entity_gpt3",
                    "entity": "pancake",
                    "attribute": "melted",
                    "change": "more likely"
                },
                {
                    "type": "openpi_entity_gpt3",
                    "entity": "pancake",
                    "attribute": "solid",
                    "change": "less likely"
                },
                {
                    "type": "openpi_entity_gpt3",
                    "entity": "pancake",
                    "attribute": "in the microwave",
                    "change": "more likely"
                },
                {
                    "type": "openpi_entity_gpt3",
                    "entity": "pancake",
                    "attribute": "in the container",
                    "change": "less likely"
                },
                {
                    "type": "openpi_entity_gpt3",
                    "entity": "pancake",
                    "attribute": "hot",
                    "change": "more likely"
                },
                {
                    "type": "openpi_entity_gpt3",
                    "entity": "pancake",
                    "attribute": "cold",
                    "change": "less likely"
                },
                {
                    "type": "openpi_entity_gpt3",
                    "entity": "pancake",
                    "attribute": "in microwave",
                    "change": "more likely"
                },
                {
                    "type": "openpi_entity_gpt3",
                    "entity": "pancake",
                    "attribute": "in fridge",
                    "change": "less likely"
                }
            ],
            [
                {
                    "type": "step",
                    "step": "Select reheat option in microwave and press start button."
                },
                {
                    "type": "entity",
                    "entity": "the pancake",
                    "attribute": "hot",
                    "change": "more likely"
                },
                {
                    "type": "openpi_entity_gpt3",
                    "entity": "microwave",
                    "attribute": "on",
                    "change": "more likely"
                },
                {
                    "type": "openpi_entity_gpt3",
                    "entity": "microwave",
                    "attribute": "off",
                    "change": "less likely"
                },
                {
                    "type": "openpi_entity_gpt3",
                    "entity": "microwave",
                    "attribute": "hot",
                    "change": "more likely"
                },
                {
                    "type": "openpi_entity_gpt3",
                    "entity": "microwave",
                    "attribute": "cold",
                    "change": "less likely"
                },
                {
                    "type": "openpi_entity_gpt3",
                    "entity": "microwave",
                    "attribute": "on",
                    "change": "more likely"
                },
                {
                    "type": "openpi_entity_gpt3",
                    "entity": "microwave",
                    "attribute": "off",
                    "change": "less likely"
                },
                {
                    "type": "openpi_entity_gpt3",
                    "entity": "pancake",
                    "attribute": "hot",
                    "change": "more likely"
                },
                {
                    "type": "openpi_entity_gpt3",
                    "entity": "pancake",
                    "attribute": "cold",
                    "change": "less likely"
                }
            ],
            [
                {
                    "type": "step",
                    "step": "After 2 minutes, Let the pancake rest and take it out from microwave."
                },
                {
                    "type": "openpi_entity_gpt3",
                    "entity": "pancake",
                    "attribute": "cooler",
                    "change": "more likely"
                },
                {
                    "type": "openpi_entity_gpt3",
                    "entity": "pancake",
                    "attribute": "hot",
                    "change": "less likely"
                },
                {
                    "type": "openpi_entity_gpt3",
                    "entity": "pancake",
                    "attribute": "cooled",
                    "change": "more likely"
                },
                {
                    "type": "openpi_entity_gpt3",
                    "entity": "pancake",
                    "attribute": "hot",
                    "change": "less likely"
                },
                {
                    "type": "openpi_entity_gpt3",
                    "entity": "pancake",
                    "attribute": "out of microwave",
                    "change": "more likely"
                },
                {
                    "type": "openpi_entity_gpt3",
                    "entity": "pancake",
                    "attribute": "in microwave",
                    "change": "less likely"
                },
                {
                    "type": "openpi_entity_gpt3",
                    "entity": "pancake",
                    "attribute": "cool",
                    "change": "more likely"
                },
                {
                    "type": "openpi_entity_gpt3",
                    "entity": "pancake",
                    "attribute": "hot",
                    "change": "less likely"
                }
            ]
        ]
    },
    "6": {
        "goal": "Wash your hands",
        "annotator": "Hengyan Tao",
        "steps": [
            [
                {
                    "step": "Start."
                }
            ],
            [
                {
                    "type": "step",
                    "step": "Wet hands with running water."
                },
                {
                    "type": "openpi_entity_gpt3",
                    "entity": "hands",
                    "attribute": "wet",
                    "change": "more likely"
                },
                {
                    "type": "openpi_entity_gpt3",
                    "entity": "hands",
                    "attribute": "dry",
                    "change": "less likely"
                },
                {
                    "type": "openpi_entity_gpt3",
                    "entity": "hands",
                    "attribute": "wet",
                    "change": "more likely"
                },
                {
                    "type": "openpi_entity_gpt3",
                    "entity": "hands",
                    "attribute": "dry",
                    "change": "less likely"
                },
                {
                    "type": "openpi_entity_gpt3",
                    "entity": "water",
                    "attribute": "in sink",
                    "change": "more likely"
                },
                {
                    "type": "openpi_entity_gpt3",
                    "entity": "water",
                    "attribute": "in faucet",
                    "change": "less likely"
                }
            ],
            [
                {
                    "type": "step",
                    "step": "Get soap and scrub."
                },
                {
                    "type": "entity",
                    "entity": "the hands",
                    "attribute": "clean",
                    "change": "more likely"
                },
                {
                    "type": "openpi_entity_gpt3",
                    "entity": "soap",
                    "attribute": "clean",
                    "change": "more likely"
                },
                {
                    "type": "openpi_entity_gpt3",
                    "entity": "soap",
                    "attribute": "dirty",
                    "change": "less likely"
                },
                {
                    "type": "openpi_entity_gpt3",
                    "entity": "soap",
                    "attribute": "in the sink",
                    "change": "more likely"
                },
                {
                    "type": "openpi_entity_gpt3",
                    "entity": "soap",
                    "attribute": "in the bottle",
                    "change": "less likely"
                },
                {
                    "type": "openpi_entity_gpt3",
                    "entity": "soap",
                    "attribute": "in the sink",
                    "change": "more likely"
                },
                {
                    "type": "openpi_entity_gpt3",
                    "entity": "soap",
                    "attribute": "in the container",
                    "change": "less likely"
                },
                {
                    "type": "openpi_entity_gpt3",
                    "entity": "scrub",
                    "attribute": "in the sink",
                    "change": "more likely"
                },
                {
                    "type": "openpi_entity_gpt3",
                    "entity": "scrub",
                    "attribute": "in the container",
                    "change": "less likely"
                },
                {
                    "type": "openpi_entity_gpt3",
                    "entity": "sink",
                    "attribute": "clean",
                    "change": "more likely"
                },
                {
                    "type": "openpi_entity_gpt3",
                    "entity": "sink",
                    "attribute": "dirty",
                    "change": "less likely"
                }
            ],
            [
                {
                    "type": "step",
                    "step": "Rinse and dry."
                },
                {
                    "type": "openpi_entity_gpt3",
                    "entity": "sink",
                    "attribute": "empty of water",
                    "change": "more likely"
                },
                {
                    "type": "openpi_entity_gpt3",
                    "entity": "sink",
                    "attribute": "full of water",
                    "change": "less likely"
                },
                {
                    "type": "openpi_entity_gpt3",
                    "entity": "water",
                    "attribute": "clean",
                    "change": "more likely"
                },
                {
                    "type": "openpi_entity_gpt3",
                    "entity": "water",
                    "attribute": "dirty",
                    "change": "less likely"
                },
                {
                    "type": "openpi_entity_gpt3",
                    "entity": "soap",
                    "attribute": "clean",
                    "change": "more likely"
                },
                {
                    "type": "openpi_entity_gpt3",
                    "entity": "soap",
                    "attribute": "dirty",
                    "change": "less likely"
                },
                {
                    "type": "openpi_entity_gpt3",
                    "entity": "soap",
                    "attribute": "wet",
                    "change": "more likely"
                },
                {
                    "type": "openpi_entity_gpt3",
                    "entity": "soap",
                    "attribute": "dry",
                    "change": "less likely"
                },
                {
                    "type": "openpi_entity_gpt3",
                    "entity": "soap",
                    "attribute": "rinsed",
                    "change": "more likely"
                },
                {
                    "type": "openpi_entity_gpt3",
                    "entity": "soap",
                    "attribute": "wet",
                    "change": "less likely"
                },
                {
                    "type": "openpi_entity_gpt3",
                    "entity": "sponge",
                    "attribute": "wet",
                    "change": "more likely"
                },
                {
                    "type": "openpi_entity_gpt3",
                    "entity": "sponge",
                    "attribute": "dry",
                    "change": "less likely"
                },
                {
                    "type": "openpi_entity_gpt3",
                    "entity": "sink",
                    "attribute": "wet",
                    "change": "more likely"
                },
                {
                    "type": "openpi_entity_gpt3",
                    "entity": "sink",
                    "attribute": "dry",
                    "change": "less likely"
                },
                {
                    "type": "openpi_entity_gpt3",
                    "entity": "sponge",
                    "attribute": "dirty",
                    "change": "more likely"
                },
                {
                    "type": "openpi_entity_gpt3",
                    "entity": "sponge",
                    "attribute": "clean",
                    "change": "less likely"
                },
                {
                    "type": "openpi_entity_gpt3",
                    "entity": "soap",
                    "attribute": "rinsed",
                    "change": "more likely"
                },
                {
                    "type": "openpi_entity_gpt3",
                    "entity": "soap",
                    "attribute": "dirty",
                    "change": "less likely"
                },
                {
                    "type": "openpi_entity_gpt3",
                    "entity": "sponge",
                    "attribute": "wet",
                    "change": "more likely"
                },
                {
                    "type": "openpi_entity_gpt3",
                    "entity": "sponge",
                    "attribute": "dry",
                    "change": "less likely"
                },
                {
                    "type": "openpi_entity_gpt3",
                    "entity": "water",
                    "attribute": "rinsed",
                    "change": "more likely"
                },
                {
                    "type": "openpi_entity_gpt3",
                    "entity": "water",
                    "attribute": "dirty",
                    "change": "less likely"
                },
                {
                    "type": "openpi_entity_gpt3",
                    "entity": "sink",
                    "attribute": "clean",
                    "change": "more likely"
                },
                {
                    "type": "openpi_entity_gpt3",
                    "entity": "sink",
                    "attribute": "dirty",
                    "change": "less likely"
                }
            ]
        ]
    },
    "7": {
        "goal": "Buy a ticket from SF to Hawaii",
        "annotator": "Hengyan Tao",
        "steps": [
            [
                {
                    "step": "Start."
                }
            ],
            [
                {
                    "type": "step",
                    "step": "Open google flights and check the flights availability during the dates wanted."
                },
                {
                    "type": "openpi_entity_gpt3",
                    "entity": "flights",
                    "attribute": "open",
                    "change": "more likely"
                },
                {
                    "type": "openpi_entity_gpt3",
                    "entity": "flights",
                    "attribute": "closed",
                    "change": "less likely"
                },
                {
                    "type": "openpi_entity_gpt3",
                    "entity": "google flights",
                    "attribute": "open",
                    "change": "more likely"
                },
                {
                    "type": "openpi_entity_gpt3",
                    "entity": "google flights",
                    "attribute": "closed",
                    "change": "less likely"
                },
                {
                    "type": "openpi_entity_gpt3",
                    "entity": "flights",
                    "attribute": "available",
                    "change": "more likely"
                },
                {
                    "type": "openpi_entity_gpt3",
                    "entity": "flights",
                    "attribute": "unavailable",
                    "change": "less likely"
                },
                {
                    "type": "openpi_entity_gpt3",
                    "entity": "flights",
                    "attribute": "selected",
                    "change": "more likely"
                },
                {
                    "type": "openpi_entity_gpt3",
                    "entity": "flights",
                    "attribute": "unselected",
                    "change": "less likely"
                }
            ],
            [
                {
                    "type": "step",
                    "step": "Choose non-stop flights and check if the time slots work."
                },
                {
                    "type": "openpi_entity_gpt3",
                    "entity": "non-stop flights",
                    "attribute": "chosen",
                    "change": "more likely"
                },
                {
                    "type": "openpi_entity_gpt3",
                    "entity": "non-stop flights",
                    "attribute": "considered",
                    "change": "less likely"
                },
                {
                    "type": "openpi_entity_gpt3",
                    "entity": "flights",
                    "attribute": "chosen",
                    "change": "more likely"
                },
                {
                    "type": "openpi_entity_gpt3",
                    "entity": "flights",
                    "attribute": "considered",
                    "change": "less likely"
                },
                {
                    "type": "openpi_entity_gpt3",
                    "entity": "flights",
                    "attribute": "selected",
                    "change": "more likely"
                },
                {
                    "type": "openpi_entity_gpt3",
                    "entity": "flights",
                    "attribute": "unselected",
                    "change": "less likely"
                }
            ],
            [
                {
                    "type": "step",
                    "step": "After deciding right time slots and price, proceed to buy tickets."
                },
                {
                    "type": "openpi_entity_gpt3",
                    "entity": "flights",
                    "attribute": "selected",
                    "change": "more likely"
                },
                {
                    "type": "openpi_entity_gpt3",
                    "entity": "flights",
                    "attribute": "unselected",
                    "change": "less likely"
                },
                {
                    "type": "openpi_entity_gpt3",
                    "entity": "time slots",
                    "attribute": "selected",
                    "change": "more likely"
                },
                {
                    "type": "openpi_entity_gpt3",
                    "entity": "time slots",
                    "attribute": "unselected",
                    "change": "less likely"
                },
                {
                    "type": "openpi_entity_gpt3",
                    "entity": "price",
                    "attribute": "selected",
                    "change": "more likely"
                },
                {
                    "type": "openpi_entity_gpt3",
                    "entity": "price",
                    "attribute": "unselected",
                    "change": "less likely"
                },
                {
                    "type": "openpi_entity_gpt3",
                    "entity": "tickets",
                    "attribute": "purchased",
                    "change": "more likely"
                },
                {
                    "type": "openpi_entity_gpt3",
                    "entity": "tickets",
                    "attribute": "unsold",
                    "change": "less likely"
                },
                {
                    "type": "openpi_entity_gpt3",
                    "entity": "money",
                    "attribute": "in cash register",
                    "change": "more likely"
                },
                {
                    "type": "openpi_entity_gpt3",
                    "entity": "money",
                    "attribute": "in wallet",
                    "change": "less likely"
                },
                {
                    "type": "openpi_entity_gpt3",
                    "entity": "tickets",
                    "attribute": "sold",
                    "change": "more likely"
                },
                {
                    "type": "openpi_entity_gpt3",
                    "entity": "tickets",
                    "attribute": "unsold",
                    "change": "less likely"
                },
                {
                    "type": "openpi_entity_gpt3",
                    "entity": "tickets",
                    "attribute": "selected",
                    "change": "more likely"
                },
                {
                    "type": "openpi_entity_gpt3",
                    "entity": "tickets",
                    "attribute": "unselected",
                    "change": "less likely"
                }
            ],
            [
                {
                    "type": "step",
                    "step": "Got an email notification that the ticket is ready."
                },
                {
                    "type": "entity",
                    "entity": "the ticket",
                    "attribute": "ready",
                    "change": "more likely"
                },
                {
                    "type": "openpi_entity_gpt3",
                    "entity": "ticket",
                    "attribute": "sold",
                    "change": "more likely"
                },
                {
                    "type": "openpi_entity_gpt3",
                    "entity": "ticket",
                    "attribute": "unsold",
                    "change": "less likely"
                },
                {
                    "type": "openpi_entity_gpt3",
                    "entity": "ticket",
                    "attribute": "purchased",
                    "change": "more likely"
                },
                {
                    "type": "openpi_entity_gpt3",
                    "entity": "ticket",
                    "attribute": "unsold",
                    "change": "less likely"
                },
                {
                    "type": "openpi_entity_gpt3",
                    "entity": "email",
                    "attribute": "read",
                    "change": "more likely"
                },
                {
                    "type": "openpi_entity_gpt3",
                    "entity": "email",
                    "attribute": "unread",
                    "change": "less likely"
                }
            ]
        ]
    },
    "8": {
        "goal": "Drive to Los Angelas",
        "annotator": "Hengyan Tao",
        "steps": [
            [
                {
                    "step": "Start."
                }
            ],
            [
                {
                    "type": "step",
                    "step": "Fuel your car and make sure there is enough gasoline."
                },
                {
                    "type": "openpi_entity_gpt3",
                    "entity": "car",
                    "attribute": "full",
                    "change": "more likely"
                },
                {
                    "type": "openpi_entity_gpt3",
                    "entity": "car",
                    "attribute": "empty",
                    "change": "less likely"
                },
                {
                    "type": "openpi_entity_gpt3",
                    "entity": "gas",
                    "attribute": "in tank",
                    "change": "more likely"
                },
                {
                    "type": "openpi_entity_gpt3",
                    "entity": "gas",
                    "attribute": "in can",
                    "change": "less likely"
                }
            ],
            [
                {
                    "type": "step",
                    "step": "Hit the I5 road on the way to LA and drive safely."
                },
                {
                    "type": "openpi_entity_gpt3",
                    "entity": "i5",
                    "attribute": "on the way to LA",
                    "change": "more likely"
                },
                {
                    "type": "openpi_entity_gpt3",
                    "entity": "i5",
                    "attribute": "on the way to LA",
                    "change": "less likely"
                },
                {
                    "type": "openpi_entity_gpt3",
                    "entity": "car",
                    "attribute": "on the way to LA",
                    "change": "more likely"
                },
                {
                    "type": "openpi_entity_gpt3",
                    "entity": "car",
                    "attribute": "on the way to LA",
                    "change": "less likely"
                },
                {
                    "type": "openpi_entity_gpt3",
                    "entity": "car",
                    "attribute": "moving faster",
                    "change": "more likely"
                },
                {
                    "type": "openpi_entity_gpt3",
                    "entity": "car",
                    "attribute": "moving slowly",
                    "change": "less likely"
                }
            ],
            [
                {
                    "type": "step",
                    "step": "You see a sign Welcome to LA."
                },
                {
                    "type": "entity",
                    "entity": "you",
                    "attribute": "in LA",
                    "change": "more likely"
                },
                {
                    "type": "openpi_entity_gpt3",
                    "entity": "you",
                    "attribute": "in la",
                    "change": "more likely"
                },
                {
                    "type": "openpi_entity_gpt3",
                    "entity": "you",
                    "attribute": "on the way to l.a",
                    "change": "less likely"
                },
                {
                    "type": "openpi_entity_gpt3",
                    "entity": "you",
                    "attribute": "in la",
                    "change": "more likely"
                },
                {
                    "type": "openpi_entity_gpt3",
                    "entity": "you",
                    "attribute": "on the road",
                    "change": "less likely"
                },
                {
                    "type": "openpi_entity_gpt3",
                    "entity": "sign",
                    "attribute": "present",
                    "change": "more likely"
                },
                {
                    "type": "openpi_entity_gpt3",
                    "entity": "sign",
                    "attribute": "absent",
                    "change": "less likely"
                }
            ]
        ]
    },
    "9": {
        "goal": "Boating in lake",
        "annotator": "Hengyan Tao",
        "steps": [
            [
                {
                    "step": "Start."
                }
            ],
            [
                {
                    "type": "step",
                    "step": "Rent a boat."
                },
                {
                    "type": "openpi_entity_gpt3",
                    "entity": "boat",
                    "attribute": "owned by the shopper",
                    "change": "more likely"
                },
                {
                    "type": "openpi_entity_gpt3",
                    "entity": "boat",
                    "attribute": "owned by the store",
                    "change": "less likely"
                },
                {
                    "type": "openpi_entity_gpt3",
                    "entity": "boat",
                    "attribute": "at the marina",
                    "change": "more likely"
                },
                {
                    "type": "openpi_entity_gpt3",
                    "entity": "boat",
                    "attribute": "at the store",
                    "change": "less likely"
                },
                {
                    "type": "openpi_entity_gpt3",
                    "entity": "boat",
                    "attribute": "at the marina",
                    "change": "more likely"
                },
                {
                    "type": "openpi_entity_gpt3",
                    "entity": "boat",
                    "attribute": "at the rental place",
                    "change": "less likely"
                },
                {
                    "type": "openpi_entity_gpt3",
                    "entity": "boat",
                    "attribute": "rented to the shopper",
                    "change": "more likely"
                },
                {
                    "type": "openpi_entity_gpt3",
                    "entity": "boat",
                    "attribute": "owned by the store",
                    "change": "less likely"
                }
            ],
            [
                {
                    "type": "step",
                    "step": "Find a lake which allows boating."
                },
                {
                    "type": "openpi_entity_gpt3",
                    "entity": "lake",
                    "attribute": "found",
                    "change": "more likely"
                },
                {
                    "type": "openpi_entity_gpt3",
                    "entity": "lake",
                    "attribute": "unfound",
                    "change": "less likely"
                },
                {
                    "type": "openpi_entity_gpt3",
                    "entity": "person",
                    "attribute": "in water",
                    "change": "more likely"
                },
                {
                    "type": "openpi_entity_gpt3",
                    "entity": "person",
                    "attribute": "on land",
                    "change": "less likely"
                },
                {
                    "type": "openpi_entity_gpt3",
                    "entity": "person",
                    "attribute": "on water",
                    "change": "more likely"
                },
                {
                    "type": "openpi_entity_gpt3",
                    "entity": "person",
                    "attribute": "on land",
                    "change": "less likely"
                },
                {
                    "type": "openpi_entity_gpt3",
                    "entity": "boat",
                    "attribute": "at lake",
                    "change": "more likely"
                },
                {
                    "type": "openpi_entity_gpt3",
                    "entity": "boat",
                    "attribute": "at home",
                    "change": "less likely"
                },
                {
                    "type": "openpi_entity_gpt3",
                    "entity": "lake",
                    "attribute": "found",
                    "change": "more likely"
                },
                {
                    "type": "openpi_entity_gpt3",
                    "entity": "lake",
                    "attribute": "unknown",
                    "change": "less likely"
                }
            ],
            [
                {
                    "type": "step",
                    "step": "Drive to the lake and set the boat in lake."
                },
                {
                    "type": "entity",
                    "entity": "the boat",
                    "attribute": "in lake",
                    "change": "more likely"
                },
                {
                    "type": "openpi_entity_gpt3",
                    "entity": "boat",
                    "attribute": "at the lake",
                    "change": "more likely"
                },
                {
                    "type": "openpi_entity_gpt3",
                    "entity": "boat",
                    "attribute": "at home",
                    "change": "less likely"
                },
                {
                    "type": "openpi_entity_gpt3",
                    "entity": "boat",
                    "attribute": "in lake",
                    "change": "more likely"
                },
                {
                    "type": "openpi_entity_gpt3",
                    "entity": "boat",
                    "attribute": "at home",
                    "change": "less likely"
                }
            ],
            [
                {
                    "type": "step",
                    "step": "Enjoy the boating."
                },
                {
                    "type": "openpi_entity_gpt3",
                    "entity": "you",
                    "attribute": "now enjoying the boat",
                    "change": "more likely"
                },
                {
                    "type": "openpi_entity_gpt3",
                    "entity": "you",
                    "attribute": "enjoying the boat",
                    "change": "less likely"
                }
            ]
        ]
    },
    "10": {
        "goal": "Implement a code function",
        "annotator": "Hengyan Tao",
        "steps": [
            [
                {
                    "step": "Start."
                }
            ],
            [
                {
                    "type": "step",
                    "step": "Decide what functionality the function needs to implement and the API."
                },
                {
                    "type": "openpi_entity_gpt3",
                    "entity": "function",
                    "attribute": "implemented",
                    "change": "more likely"
                },
                {
                    "type": "openpi_entity_gpt3",
                    "entity": "function",
                    "attribute": "undetermined",
                    "change": "less likely"
                },
                {
                    "type": "openpi_entity_gpt3",
                    "entity": "api",
                    "attribute": "determined",
                    "change": "more likely"
                },
                {
                    "type": "openpi_entity_gpt3",
                    "entity": "api",
                    "attribute": "undetermined",
                    "change": "less likely"
                },
                {
                    "type": "openpi_entity_gpt3",
                    "entity": "api",
                    "attribute": "determined",
                    "change": "more likely"
                },
                {
                    "type": "openpi_entity_gpt3",
                    "entity": "api",
                    "attribute": "undetermined",
                    "change": "less likely"
                },
                {
                    "type": "openpi_entity_gpt3",
                    "entity": "function",
                    "attribute": "implemented",
                    "change": "more likely"
                },
                {
                    "type": "openpi_entity_gpt3",
                    "entity": "function",
                    "attribute": "undetermined",
                    "change": "less likely"
                }
            ],
            [
                {
                    "type": "step",
                    "step": "Decide what\u2019s the input and output parameters of the function."
                },
                {
                    "type": "openpi_entity_gpt3",
                    "entity": "input and output",
                    "attribute": "measured",
                    "change": "more likely"
                },
                {
                    "type": "openpi_entity_gpt3",
                    "entity": "input and output",
                    "attribute": "unmeasured",
                    "change": "less likely"
                },
                {
                    "type": "openpi_entity_gpt3",
                    "entity": "parameters",
                    "attribute": "measured",
                    "change": "more likely"
                },
                {
                    "type": "openpi_entity_gpt3",
                    "entity": "parameters",
                    "attribute": "unmeasured",
                    "change": "less likely"
                },
                {
                    "type": "openpi_entity_gpt3",
                    "entity": "input and output parameters",
                    "attribute": "decided",
                    "change": "more likely"
                },
                {
                    "type": "openpi_entity_gpt3",
                    "entity": "input and output parameters",
                    "attribute": "undecided",
                    "change": "less likely"
                }
            ],
            [
                {
                    "type": "step",
                    "step": "Implement the function."
                },
                {
                    "type": "entity",
                    "entity": "the function",
                    "attribute": "implemented",
                    "change": "more likely"
                },
                {
                    "type": "openpi_entity_gpt3",
                    "entity": "function",
                    "attribute": "implemented",
                    "change": "more likely"
                },
                {
                    "type": "openpi_entity_gpt3",
                    "entity": "function",
                    "attribute": "unimplemented",
                    "change": "less likely"
                }
            ],
            [
                {
                    "type": "step",
                    "step": "After implementation, do unit test, API test and system test."
                },
                {
                    "type": "openpi_entity_gpt3",
                    "entity": "test",
                    "attribute": "present",
                    "change": "more likely"
                },
                {
                    "type": "openpi_entity_gpt3",
                    "entity": "test",
                    "attribute": "absent",
                    "change": "less likely"
                },
                {
                    "type": "openpi_entity_gpt3",
                    "entity": "api test",
                    "attribute": "present",
                    "change": "more likely"
                },
                {
                    "type": "openpi_entity_gpt3",
                    "entity": "api test",
                    "attribute": "absent",
                    "change": "less likely"
                },
                {
                    "type": "openpi_entity_gpt3",
                    "entity": "system test",
                    "attribute": "present",
                    "change": "more likely"
                },
                {
                    "type": "openpi_entity_gpt3",
                    "entity": "system test",
                    "attribute": "absent",
                    "change": "less likely"
                },
                {
                    "type": "openpi_entity_gpt3",
                    "entity": "unit test",
                    "attribute": "present",
                    "change": "more likely"
                },
                {
                    "type": "openpi_entity_gpt3",
                    "entity": "unit test",
                    "attribute": "absent",
                    "change": "less likely"
                },
                {
                    "type": "openpi_entity_gpt3",
                    "entity": "function",
                    "attribute": "implemented",
                    "change": "more likely"
                },
                {
                    "type": "openpi_entity_gpt3",
                    "entity": "function",
                    "attribute": "unimplemented",
                    "change": "less likely"
                }
            ]
        ]
    },
    "11": {
        "goal": "\u00ef\u00bb\u00bfMaking a Virgin Strawberry Daiquiri",
        "annotator": "kuan wei",
        "steps": [
            [
                {
                    "step": "Start."
                }
            ],
            [
                {
                    "type": "step",
                    "step": "Fill a blender with cracked ice."
                },
                {
                    "type": "openpi_entity_gpt3",
                    "entity": "ice",
                    "attribute": "cold",
                    "change": "more likely"
                },
                {
                    "type": "openpi_entity_gpt3",
                    "entity": "ice",
                    "attribute": "cold",
                    "change": "less likely"
                },
                {
                    "type": "openpi_entity_gpt3",
                    "entity": "ice",
                    "attribute": "in blender",
                    "change": "more likely"
                },
                {
                    "type": "openpi_entity_gpt3",
                    "entity": "ice",
                    "attribute": "in freezer",
                    "change": "less likely"
                },
                {
                    "type": "openpi_entity_gpt3",
                    "entity": "ice",
                    "attribute": "in the ice cube tray",
                    "change": "more likely"
                },
                {
                    "type": "openpi_entity_gpt3",
                    "entity": "ice",
                    "attribute": "in the blender",
                    "change": "less likely"
                },
                {
                    "type": "openpi_entity_gpt3",
                    "entity": "blender",
                    "attribute": "warm",
                    "change": "more likely"
                },
                {
                    "type": "openpi_entity_gpt3",
                    "entity": "blender",
                    "attribute": "cool",
                    "change": "less likely"
                },
                {
                    "type": "openpi_entity_gpt3",
                    "entity": "blender",
                    "attribute": "full",
                    "change": "more likely"
                },
                {
                    "type": "openpi_entity_gpt3",
                    "entity": "blender",
                    "attribute": "empty",
                    "change": "less likely"
                },
                {
                    "type": "openpi_entity_gpt3",
                    "entity": "blender",
                    "attribute": "warm",
                    "change": "more likely"
                },
                {
                    "type": "openpi_entity_gpt3",
                    "entity": "blender",
                    "attribute": "cold",
                    "change": "less likely"
                },
                {
                    "type": "openpi_entity_gpt3",
                    "entity": "ice",
                    "attribute": "in the blender",
                    "change": "more likely"
                },
                {
                    "type": "openpi_entity_gpt3",
                    "entity": "ice",
                    "attribute": "in the freezer",
                    "change": "less likely"
                }
            ],
            [
                {
                    "type": "step",
                    "step": "Cut and slice 3 ounces (90 grams) of strawberries."
                },
                {
                    "type": "openpi_entity_gpt3",
                    "entity": "strawberries",
                    "attribute": "cut",
                    "change": "more likely"
                },
                {
                    "type": "openpi_entity_gpt3",
                    "entity": "strawberries",
                    "attribute": "whole",
                    "change": "less likely"
                },
                {
                    "type": "openpi_entity_gpt3",
                    "entity": "cutting board",
                    "attribute": "dirty",
                    "change": "more likely"
                },
                {
                    "type": "openpi_entity_gpt3",
                    "entity": "cutting board",
                    "attribute": "clean",
                    "change": "less likely"
                },
                {
                    "type": "openpi_entity_gpt3",
                    "entity": "knife",
                    "attribute": "dirty",
                    "change": "more likely"
                },
                {
                    "type": "openpi_entity_gpt3",
                    "entity": "knife",
                    "attribute": "clean",
                    "change": "less likely"
                },
                {
                    "type": "openpi_entity_gpt3",
                    "entity": "strawberries",
                    "attribute": "cut",
                    "change": "more likely"
                },
                {
                    "type": "openpi_entity_gpt3",
                    "entity": "strawberries",
                    "attribute": "whole",
                    "change": "less likely"
                },
                {
                    "type": "openpi_entity_gpt3",
                    "entity": "strawberries",
                    "attribute": "cut up",
                    "change": "more likely"
                },
                {
                    "type": "openpi_entity_gpt3",
                    "entity": "strawberries",
                    "attribute": "whole",
                    "change": "less likely"
                },
                {
                    "type": "openpi_entity_gpt3",
                    "entity": "blender",
                    "attribute": "dirty",
                    "change": "more likely"
                },
                {
                    "type": "openpi_entity_gpt3",
                    "entity": "blender",
                    "attribute": "clean",
                    "change": "less likely"
                },
                {
                    "type": "openpi_entity_gpt3",
                    "entity": "strawberries",
                    "attribute": "in blender",
                    "change": "more likely"
                },
                {
                    "type": "openpi_entity_gpt3",
                    "entity": "strawberries",
                    "attribute": "in fridge",
                    "change": "less likely"
                },
                {
                    "type": "openpi_entity_gpt3",
                    "entity": "strawberries",
                    "attribute": "in the blender",
                    "change": "more likely"
                },
                {
                    "type": "openpi_entity_gpt3",
                    "entity": "strawberries",
                    "attribute": "in the fridge",
                    "change": "less likely"
                },
                {
                    "type": "openpi_entity_gpt3",
                    "entity": "blender",
                    "attribute": "heavier",
                    "change": "more likely"
                },
                {
                    "type": "openpi_entity_gpt3",
                    "entity": "blender",
                    "attribute": "lighter",
                    "change": "less likely"
                },
                {
                    "type": "openpi_entity_gpt3",
                    "entity": "strawberries",
                    "attribute": "cut into pieces",
                    "change": "more likely"
                },
                {
                    "type": "openpi_entity_gpt3",
                    "entity": "strawberries",
                    "attribute": "whole",
                    "change": "less likely"
                },
                {
                    "type": "openpi_entity_gpt3",
                    "entity": "strawberries",
                    "attribute": "sliced",
                    "change": "more likely"
                },
                {
                    "type": "openpi_entity_gpt3",
                    "entity": "strawberries",
                    "attribute": "whole",
                    "change": "less likely"
                }
            ],
            [
                {
                    "type": "step",
                    "step": "Add the strawberries to the blender, along with the sugar and lime juice."
                },
                {
                    "type": "openpi_entity_gpt3",
                    "entity": "strawberries",
                    "attribute": "inside blender",
                    "change": "more likely"
                },
                {
                    "type": "openpi_entity_gpt3",
                    "entity": "strawberries",
                    "attribute": "outside of blender",
                    "change": "less likely"
                },
                {
                    "type": "openpi_entity_gpt3",
                    "entity": "sugar",
                    "attribute": "in the blender",
                    "change": "more likely"
                },
                {
                    "type": "openpi_entity_gpt3",
                    "entity": "sugar",
                    "attribute": "in the container",
                    "change": "less likely"
                },
                {
                    "type": "openpi_entity_gpt3",
                    "entity": "lime juice",
                    "attribute": "in the blender",
                    "change": "more likely"
                },
                {
                    "type": "openpi_entity_gpt3",
                    "entity": "lime juice",
                    "attribute": "in a juice box",
                    "change": "less likely"
                }
            ],
            [
                {
                    "type": "step",
                    "step": "Blend until the mixture is smooth.\u00c2\u00a0"
                },
                {
                    "type": "entity",
                    "entity": "the strawberries",
                    "attribute": "liquid",
                    "change": "more likely"
                },
                {
                    "type": "multihop",
                    "event": "I drink the strawberries.",
                    "change": "more likely"
                },
                {
                    "type": "openpi_entity_gpt3",
                    "entity": "mixture",
                    "attribute": "smooth",
                    "change": "more likely"
                },
                {
                    "type": "openpi_entity_gpt3",
                    "entity": "mixture",
                    "attribute": "grainy",
                    "change": "less likely"
                },
                {
                    "type": "openpi_entity_gpt3",
                    "entity": "strawberries",
                    "attribute": "smooth",
                    "change": "more likely"
                },
                {
                    "type": "openpi_entity_gpt3",
                    "entity": "strawberries",
                    "attribute": "firm",
                    "change": "less likely"
                },
                {
                    "type": "openpi_entity_gpt3",
                    "entity": "strawberries",
                    "attribute": "soft",
                    "change": "more likely"
                },
                {
                    "type": "openpi_entity_gpt3",
                    "entity": "strawberries",
                    "attribute": "firm",
                    "change": "less likely"
                },
                {
                    "type": "openpi_entity_gpt3",
                    "entity": "mixture",
                    "attribute": "smooth",
                    "change": "more likely"
                },
                {
                    "type": "openpi_entity_gpt3",
                    "entity": "mixture",
                    "attribute": "chunky",
                    "change": "less likely"
                },
                {
                    "type": "openpi_entity_gpt3",
                    "entity": "strawberries",
                    "attribute": "soft",
                    "change": "more likely"
                },
                {
                    "type": "openpi_entity_gpt3",
                    "entity": "strawberries",
                    "attribute": "hard",
                    "change": "less likely"
                }
            ],
            [
                {
                    "type": "step",
                    "step": "Pour the mixture into a glass and garnish it with a strawberry."
                },
                {
                    "type": "openpi_entity_gpt3",
                    "entity": "glass",
                    "attribute": "heavier",
                    "change": "more likely"
                },
                {
                    "type": "openpi_entity_gpt3",
                    "entity": "glass",
                    "attribute": "lighter",
                    "change": "less likely"
                },
                {
                    "type": "openpi_entity_gpt3",
                    "entity": "the mixture",
                    "attribute": "in the glass",
                    "change": "more likely"
                },
                {
                    "type": "openpi_entity_gpt3",
                    "entity": "the mixture",
                    "attribute": "in the blender",
                    "change": "less likely"
                },
                {
                    "type": "openpi_entity_gpt3",
                    "entity": "mixture",
                    "attribute": "in glass",
                    "change": "more likely"
                },
                {
                    "type": "openpi_entity_gpt3",
                    "entity": "mixture",
                    "attribute": "in blender",
                    "change": "less likely"
                },
                {
                    "type": "openpi_entity_gpt3",
                    "entity": "the glass",
                    "attribute": "dirty",
                    "change": "more likely"
                },
                {
                    "type": "openpi_entity_gpt3",
                    "entity": "the glass",
                    "attribute": "clean",
                    "change": "less likely"
                },
                {
                    "type": "openpi_entity_gpt3",
                    "entity": "the blender",
                    "attribute": "lighter",
                    "change": "more likely"
                },
                {
                    "type": "openpi_entity_gpt3",
                    "entity": "the blender",
                    "attribute": "heavier",
                    "change": "less likely"
                },
                {
                    "type": "openpi_entity_gpt3",
                    "entity": "blender",
                    "attribute": "less full",
                    "change": "more likely"
                },
                {
                    "type": "openpi_entity_gpt3",
                    "entity": "blender",
                    "attribute": "fuller",
                    "change": "less likely"
                },
                {
                    "type": "openpi_entity_gpt3",
                    "entity": "blender",
                    "attribute": "lighter",
                    "change": "more likely"
                },
                {
                    "type": "openpi_entity_gpt3",
                    "entity": "blender",
                    "attribute": "heavier",
                    "change": "less likely"
                },
                {
                    "type": "openpi_entity_gpt3",
                    "entity": "glass",
                    "attribute": "full",
                    "change": "more likely"
                },
                {
                    "type": "openpi_entity_gpt3",
                    "entity": "glass",
                    "attribute": "empty",
                    "change": "less likely"
                },
                {
                    "type": "openpi_entity_gpt3",
                    "entity": "the glass",
                    "attribute": "heavier",
                    "change": "more likely"
                },
                {
                    "type": "openpi_entity_gpt3",
                    "entity": "the glass",
                    "attribute": "lighter",
                    "change": "less likely"
                }
            ],
            [
                {
                    "type": "step",
                    "step": "Serve."
                }
            ]
        ]
    },
    "12": {
        "goal": "Making Matcha Green Tea the Traditional Way",
        "annotator": "kuan wei",
        "steps": [
            [
                {
                    "step": "Start."
                }
            ],
            [
                {
                    "type": "step",
                    "step": "Boil 3/4 cup (180 ml) of water and pour it into your matcha bowl.\u00c2\u00a0"
                },
                {
                    "type": "openpi_entity_gpt3",
                    "entity": "water",
                    "attribute": "in the bowl",
                    "change": "more likely"
                },
                {
                    "type": "openpi_entity_gpt3",
                    "entity": "water",
                    "attribute": "in the faucet",
                    "change": "less likely"
                },
                {
                    "type": "openpi_entity_gpt3",
                    "entity": "matcha",
                    "attribute": "in bowl",
                    "change": "more likely"
                },
                {
                    "type": "openpi_entity_gpt3",
                    "entity": "matcha",
                    "attribute": "in container",
                    "change": "less likely"
                },
                {
                    "type": "openpi_entity_gpt3",
                    "entity": "bowl",
                    "attribute": "hot",
                    "change": "more likely"
                },
                {
                    "type": "openpi_entity_gpt3",
                    "entity": "bowl",
                    "attribute": "cool",
                    "change": "less likely"
                },
                {
                    "type": "openpi_entity_gpt3",
                    "entity": "water",
                    "attribute": "hot",
                    "change": "more likely"
                },
                {
                    "type": "openpi_entity_gpt3",
                    "entity": "water",
                    "attribute": "cool",
                    "change": "less likely"
                },
                {
                    "type": "openpi_entity_gpt3",
                    "entity": "water",
                    "attribute": "in the bowl",
                    "change": "more likely"
                },
                {
                    "type": "openpi_entity_gpt3",
                    "entity": "water",
                    "attribute": "in the tap",
                    "change": "less likely"
                },
                {
                    "type": "openpi_entity_gpt3",
                    "entity": "matcha",
                    "attribute": "in the bowl",
                    "change": "more likely"
                },
                {
                    "type": "openpi_entity_gpt3",
                    "entity": "matcha",
                    "attribute": "in the container",
                    "change": "less likely"
                },
                {
                    "type": "openpi_entity_gpt3",
                    "entity": "matcha",
                    "attribute": "hot",
                    "change": "more likely"
                },
                {
                    "type": "openpi_entity_gpt3",
                    "entity": "matcha",
                    "attribute": "cool",
                    "change": "less likely"
                }
            ],
            [
                {
                    "type": "step",
                    "step": "Whisk the hot water with a chasen.\u00c2\u00a0"
                },
                {
                    "type": "openpi_entity_gpt3",
                    "entity": "whisk",
                    "attribute": "in hand",
                    "change": "more likely"
                },
                {
                    "type": "openpi_entity_gpt3",
                    "entity": "whisk",
                    "attribute": "in cupboard",
                    "change": "less likely"
                },
                {
                    "type": "openpi_entity_gpt3",
                    "entity": "chasen",
                    "attribute": "hot",
                    "change": "more likely"
                },
                {
                    "type": "openpi_entity_gpt3",
                    "entity": "chasen",
                    "attribute": "cool",
                    "change": "less likely"
                },
                {
                    "type": "openpi_entity_gpt3",
                    "entity": "whisk",
                    "attribute": "moving",
                    "change": "more likely"
                },
                {
                    "type": "openpi_entity_gpt3",
                    "entity": "whisk",
                    "attribute": "still",
                    "change": "less likely"
                },
                {
                    "type": "openpi_entity_gpt3",
                    "entity": "chasen",
                    "attribute": "in the bowl",
                    "change": "more likely"
                },
                {
                    "type": "openpi_entity_gpt3",
                    "entity": "chasen",
                    "attribute": "in the cupboard",
                    "change": "less likely"
                },
                {
                    "type": "openpi_entity_gpt3",
                    "entity": "whisk",
                    "attribute": "in bowl",
                    "change": "more likely"
                },
                {
                    "type": "openpi_entity_gpt3",
                    "entity": "whisk",
                    "attribute": "in cupboard",
                    "change": "less likely"
                },
                {
                    "type": "openpi_entity_gpt3",
                    "entity": "water",
                    "attribute": "hot",
                    "change": "more likely"
                },
                {
                    "type": "openpi_entity_gpt3",
                    "entity": "water",
                    "attribute": "cool",
                    "change": "less likely"
                },
                {
                    "type": "openpi_entity_gpt3",
                    "entity": "water",
                    "attribute": "hot",
                    "change": "more likely"
                },
                {
                    "type": "openpi_entity_gpt3",
                    "entity": "water",
                    "attribute": "cold",
                    "change": "less likely"
                },
                {
                    "type": "openpi_entity_gpt3",
                    "entity": "matcha",
                    "attribute": "hot",
                    "change": "more likely"
                },
                {
                    "type": "openpi_entity_gpt3",
                    "entity": "matcha",
                    "attribute": "cool",
                    "change": "less likely"
                }
            ],
            [
                {
                    "type": "step",
                    "step": "Discard the hot water from the bowl."
                },
                {
                    "type": "openpi_entity_gpt3",
                    "entity": "bowl",
                    "attribute": "cool",
                    "change": "more likely"
                },
                {
                    "type": "openpi_entity_gpt3",
                    "entity": "bowl",
                    "attribute": "hot",
                    "change": "less likely"
                },
                {
                    "type": "openpi_entity_gpt3",
                    "entity": "matcha",
                    "attribute": "cool",
                    "change": "more likely"
                },
                {
                    "type": "openpi_entity_gpt3",
                    "entity": "matcha",
                    "attribute": "hot",
                    "change": "less likely"
                },
                {
                    "type": "openpi_entity_gpt3",
                    "entity": "hot water",
                    "attribute": "in sink",
                    "change": "more likely"
                },
                {
                    "type": "openpi_entity_gpt3",
                    "entity": "hot water",
                    "attribute": "in bowl",
                    "change": "less likely"
                },
                {
                    "type": "openpi_entity_gpt3",
                    "entity": "water",
                    "attribute": "cool",
                    "change": "more likely"
                },
                {
                    "type": "openpi_entity_gpt3",
                    "entity": "water",
                    "attribute": "hot",
                    "change": "less likely"
                },
                {
                    "type": "openpi_entity_gpt3",
                    "entity": "matcha",
                    "attribute": "cool",
                    "change": "more likely"
                },
                {
                    "type": "openpi_entity_gpt3",
                    "entity": "matcha",
                    "attribute": "warm",
                    "change": "less likely"
                }
            ],
            [
                {
                    "type": "step",
                    "step": "Scoop 2 tsp (1.5 heaping teaspoons or 10 g) of matcha into a fine mesh strainer."
                },
                {
                    "type": "openpi_entity_gpt3",
                    "entity": "strainer",
                    "attribute": "heavier",
                    "change": "more likely"
                },
                {
                    "type": "openpi_entity_gpt3",
                    "entity": "strainer",
                    "attribute": "lighter",
                    "change": "less likely"
                },
                {
                    "type": "openpi_entity_gpt3",
                    "entity": "strainer",
                    "attribute": "dirty",
                    "change": "more likely"
                },
                {
                    "type": "openpi_entity_gpt3",
                    "entity": "strainer",
                    "attribute": "clean",
                    "change": "less likely"
                },
                {
                    "type": "openpi_entity_gpt3",
                    "entity": "matcha",
                    "attribute": "in strainer",
                    "change": "more likely"
                },
                {
                    "type": "openpi_entity_gpt3",
                    "entity": "matcha",
                    "attribute": "in bowl",
                    "change": "less likely"
                },
                {
                    "type": "openpi_entity_gpt3",
                    "entity": "bowl",
                    "attribute": "lighter",
                    "change": "more likely"
                },
                {
                    "type": "openpi_entity_gpt3",
                    "entity": "bowl",
                    "attribute": "heavier",
                    "change": "less likely"
                },
                {
                    "type": "openpi_entity_gpt3",
                    "entity": "matcha",
                    "attribute": "in the strainer",
                    "change": "more likely"
                },
                {
                    "type": "openpi_entity_gpt3",
                    "entity": "matcha",
                    "attribute": "in the bowl",
                    "change": "less likely"
                },
                {
                    "type": "openpi_entity_gpt3",
                    "entity": "mesh",
                    "attribute": "dirty",
                    "change": "more likely"
                },
                {
                    "type": "openpi_entity_gpt3",
                    "entity": "mesh",
                    "attribute": "clean",
                    "change": "less likely"
                },
                {
                    "type": "openpi_entity_gpt3",
                    "entity": "bowl",
                    "attribute": "empty",
                    "change": "more likely"
                },
                {
                    "type": "openpi_entity_gpt3",
                    "entity": "bowl",
                    "attribute": "full",
                    "change": "less likely"
                }
            ],
            [
                {
                    "type": "step",
                    "step": "Sift the matcha into your empty, dry bowl."
                },
                {
                    "type": "openpi_entity_gpt3",
                    "entity": "matcha",
                    "attribute": "in the empty",
                    "change": "more likely"
                },
                {
                    "type": "openpi_entity_gpt3",
                    "entity": "matcha",
                    "attribute": "in the bowl",
                    "change": "less likely"
                },
                {
                    "type": "openpi_entity_gpt3",
                    "entity": "matcha",
                    "attribute": "in bowl",
                    "change": "more likely"
                },
                {
                    "type": "openpi_entity_gpt3",
                    "entity": "matcha",
                    "attribute": "in strainer",
                    "change": "less likely"
                },
                {
                    "type": "openpi_entity_gpt3",
                    "entity": "bowl",
                    "attribute": "dirty",
                    "change": "more likely"
                },
                {
                    "type": "openpi_entity_gpt3",
                    "entity": "bowl",
                    "attribute": "clean",
                    "change": "less likely"
                },
                {
                    "type": "openpi_entity_gpt3",
                    "entity": "bowl",
                    "attribute": "heavier",
                    "change": "more likely"
                },
                {
                    "type": "openpi_entity_gpt3",
                    "entity": "bowl",
                    "attribute": "lighter",
                    "change": "less likely"
                },
                {
                    "type": "openpi_entity_gpt3",
                    "entity": "bowl",
                    "attribute": "full",
                    "change": "more likely"
                },
                {
                    "type": "openpi_entity_gpt3",
                    "entity": "bowl",
                    "attribute": "empty",
                    "change": "less likely"
                },
                {
                    "type": "openpi_entity_gpt3",
                    "entity": "matcha",
                    "attribute": "in the strainer",
                    "change": "more likely"
                },
                {
                    "type": "openpi_entity_gpt3",
                    "entity": "matcha",
                    "attribute": "in the bowl",
                    "change": "less likely"
                },
                {
                    "type": "openpi_entity_gpt3",
                    "entity": "matcha",
                    "attribute": "in the bowl",
                    "change": "more likely"
                },
                {
                    "type": "openpi_entity_gpt3",
                    "entity": "matcha",
                    "attribute": "in the strainer",
                    "change": "less likely"
                },
                {
                    "type": "openpi_entity_gpt3",
                    "entity": "bowl",
                    "attribute": "empty",
                    "change": "more likely"
                },
                {
                    "type": "openpi_entity_gpt3",
                    "entity": "bowl",
                    "attribute": "full",
                    "change": "less likely"
                }
            ],
            [
                {
                    "type": "step",
                    "step": "Pour boiling water into a teacup.\u00c2\u00a0"
                },
                {
                    "type": "openpi_entity_gpt3",
                    "entity": "teacup",
                    "attribute": "hot",
                    "change": "more likely"
                },
                {
                    "type": "openpi_entity_gpt3",
                    "entity": "teacup",
                    "attribute": "room temperature",
                    "change": "less likely"
                },
                {
                    "type": "openpi_entity_gpt3",
                    "entity": "bowl",
                    "attribute": "cool",
                    "change": "more likely"
                },
                {
                    "type": "openpi_entity_gpt3",
                    "entity": "bowl",
                    "attribute": "hot",
                    "change": "less likely"
                },
                {
                    "type": "openpi_entity_gpt3",
                    "entity": "teacup",
                    "attribute": "cool",
                    "change": "more likely"
                },
                {
                    "type": "openpi_entity_gpt3",
                    "entity": "teacup",
                    "attribute": "room temperature",
                    "change": "less likely"
                },
                {
                    "type": "openpi_entity_gpt3",
                    "entity": "teacup",
                    "attribute": "hot",
                    "change": "more likely"
                },
                {
                    "type": "openpi_entity_gpt3",
                    "entity": "teacup",
                    "attribute": "cool",
                    "change": "less likely"
                }
            ],
            [
                {
                    "type": "step",
                    "step": "Add a small amount of hot water into the matcha bowl and whisk it.\u00c2\u00a0"
                },
                {
                    "type": "entity",
                    "entity": "the matcha",
                    "attribute": "in the form of powder",
                    "change": "less likely"
                },
                {
                    "type": "multihop",
                    "event": "I drink the matcha.",
                    "change": "more likely"
                },
                {
                    "type": "openpi_entity_gpt3",
                    "entity": "matcha",
                    "attribute": "warmer",
                    "change": "more likely"
                },
                {
                    "type": "openpi_entity_gpt3",
                    "entity": "matcha",
                    "attribute": "cooler",
                    "change": "less likely"
                },
                {
                    "type": "openpi_entity_gpt3",
                    "entity": "matcha",
                    "attribute": "hot",
                    "change": "more likely"
                },
                {
                    "type": "openpi_entity_gpt3",
                    "entity": "matcha",
                    "attribute": "cool",
                    "change": "less likely"
                }
            ],
            [
                {
                    "type": "step",
                    "step": "Add the teacup water to the bowl until it's 1/3 full and continue whisking.\u00c2\u00a0"
                },
                {
                    "type": "openpi_entity_gpt3",
                    "entity": "bowl",
                    "attribute": "warmer",
                    "change": "more likely"
                },
                {
                    "type": "openpi_entity_gpt3",
                    "entity": "bowl",
                    "attribute": "cooler",
                    "change": "less likely"
                },
                {
                    "type": "openpi_entity_gpt3",
                    "entity": "bowl",
                    "attribute": "full",
                    "change": "more likely"
                },
                {
                    "type": "openpi_entity_gpt3",
                    "entity": "bowl",
                    "attribute": "empty",
                    "change": "less likely"
                },
                {
                    "type": "openpi_entity_gpt3",
                    "entity": "teacup water",
                    "attribute": "in bowl",
                    "change": "more likely"
                },
                {
                    "type": "openpi_entity_gpt3",
                    "entity": "teacup water",
                    "attribute": "in teacup",
                    "change": "less likely"
                },
                {
                    "type": "openpi_entity_gpt3",
                    "entity": "matcha",
                    "attribute": "in teacup",
                    "change": "more likely"
                },
                {
                    "type": "openpi_entity_gpt3",
                    "entity": "matcha",
                    "attribute": "in bowl",
                    "change": "less likely"
                },
                {
                    "type": "openpi_entity_gpt3",
                    "entity": "matcha",
                    "attribute": "warmer",
                    "change": "more likely"
                },
                {
                    "type": "openpi_entity_gpt3",
                    "entity": "matcha",
                    "attribute": "cooler",
                    "change": "less likely"
                },
                {
                    "type": "openpi_entity_gpt3",
                    "entity": "matcha",
                    "attribute": "hot",
                    "change": "more likely"
                },
                {
                    "type": "openpi_entity_gpt3",
                    "entity": "matcha",
                    "attribute": "cool",
                    "change": "less likely"
                }
            ],
            [
                {
                    "type": "step",
                    "step": "Clean your utensils."
                },
                {
                    "type": "openpi_entity_gpt3",
                    "entity": "utensils",
                    "attribute": "in the teacup",
                    "change": "more likely"
                },
                {
                    "type": "openpi_entity_gpt3",
                    "entity": "utensils",
                    "attribute": "in the drawer",
                    "change": "less likely"
                },
                {
                    "type": "openpi_entity_gpt3",
                    "entity": "utensils",
                    "attribute": "on the table",
                    "change": "more likely"
                },
                {
                    "type": "openpi_entity_gpt3",
                    "entity": "utensils",
                    "attribute": "in the drawer",
                    "change": "less likely"
                },
                {
                    "type": "openpi_entity_gpt3",
                    "entity": "utensils",
                    "attribute": "clean",
                    "change": "more likely"
                },
                {
                    "type": "openpi_entity_gpt3",
                    "entity": "utensils",
                    "attribute": "dirty",
                    "change": "less likely"
                }
            ]
        ]
    },
    "13": {
        "goal": "How to Make a Watermelon Keg",
        "annotator": "kuan wei",
        "steps": [
            [
                {
                    "step": "Start."
                }
            ],
            [
                {
                    "type": "step",
                    "step": "Wash the watermelon.\u00c2\u00a0"
                },
                {
                    "type": "openpi_entity_gpt3",
                    "entity": "dirt",
                    "attribute": "on the towel",
                    "change": "more likely"
                },
                {
                    "type": "openpi_entity_gpt3",
                    "entity": "dirt",
                    "attribute": "on the watermelon",
                    "change": "less likely"
                },
                {
                    "type": "openpi_entity_gpt3",
                    "entity": "watermelon",
                    "attribute": "clean",
                    "change": "more likely"
                },
                {
                    "type": "openpi_entity_gpt3",
                    "entity": "watermelon",
                    "attribute": "dirty",
                    "change": "less likely"
                },
                {
                    "type": "openpi_entity_gpt3",
                    "entity": "water",
                    "attribute": "on watermelon",
                    "change": "more likely"
                },
                {
                    "type": "openpi_entity_gpt3",
                    "entity": "water",
                    "attribute": "in hose",
                    "change": "less likely"
                },
                {
                    "type": "openpi_entity_gpt3",
                    "entity": "towel",
                    "attribute": "wet",
                    "change": "more likely"
                },
                {
                    "type": "openpi_entity_gpt3",
                    "entity": "towel",
                    "attribute": "dry",
                    "change": "less likely"
                },
                {
                    "type": "openpi_entity_gpt3",
                    "entity": "watermelon",
                    "attribute": "wet",
                    "change": "more likely"
                },
                {
                    "type": "openpi_entity_gpt3",
                    "entity": "watermelon",
                    "attribute": "dry",
                    "change": "less likely"
                }
            ],
            [
                {
                    "type": "step",
                    "step": "Mark the cut line."
                },
                {
                    "type": "openpi_entity_gpt3",
                    "entity": "watermelon",
                    "attribute": "marked",
                    "change": "more likely"
                },
                {
                    "type": "openpi_entity_gpt3",
                    "entity": "watermelon",
                    "attribute": "unmarked",
                    "change": "less likely"
                },
                {
                    "type": "openpi_entity_gpt3",
                    "entity": "knife",
                    "attribute": "on the watermelon",
                    "change": "more likely"
                },
                {
                    "type": "openpi_entity_gpt3",
                    "entity": "knife",
                    "attribute": "in the drawer",
                    "change": "less likely"
                },
                {
                    "type": "openpi_entity_gpt3",
                    "entity": "knife",
                    "attribute": "dirty",
                    "change": "more likely"
                },
                {
                    "type": "openpi_entity_gpt3",
                    "entity": "knife",
                    "attribute": "clean",
                    "change": "less likely"
                },
                {
                    "type": "openpi_entity_gpt3",
                    "entity": "watermelon",
                    "attribute": "in the sink",
                    "change": "more likely"
                },
                {
                    "type": "openpi_entity_gpt3",
                    "entity": "watermelon",
                    "attribute": "in the garden",
                    "change": "less likely"
                }
            ],
            [
                {
                    "type": "step",
                    "step": "Draw decorative features.\u00c2\u00a0"
                },
                {
                    "type": "openpi_entity_gpt3",
                    "entity": "watermelon",
                    "attribute": "drawn on",
                    "change": "more likely"
                },
                {
                    "type": "openpi_entity_gpt3",
                    "entity": "watermelon",
                    "attribute": "unmarked",
                    "change": "less likely"
                },
                {
                    "type": "openpi_entity_gpt3",
                    "entity": "watermelon",
                    "attribute": "drawn on",
                    "change": "more likely"
                },
                {
                    "type": "openpi_entity_gpt3",
                    "entity": "watermelon",
                    "attribute": "plain",
                    "change": "less likely"
                },
                {
                    "type": "openpi_entity_gpt3",
                    "entity": "watermelon",
                    "attribute": "marked",
                    "change": "more likely"
                },
                {
                    "type": "openpi_entity_gpt3",
                    "entity": "watermelon",
                    "attribute": "plain",
                    "change": "less likely"
                },
                {
                    "type": "openpi_entity_gpt3",
                    "entity": "watermelon",
                    "attribute": "drawn",
                    "change": "more likely"
                },
                {
                    "type": "openpi_entity_gpt3",
                    "entity": "watermelon",
                    "attribute": "plain",
                    "change": "less likely"
                }
            ],
            [
                {
                    "type": "step",
                    "step": "Cut off the top of the watermelon.\u00c2\u00a0"
                },
                {
                    "type": "entity",
                    "entity": "the watermelon",
                    "attribute": "broken",
                    "change": "more likely"
                },
                {
                    "type": "multihop",
                    "event": "I reach the watermelon's inside.",
                    "change": "more likely"
                },
                {
                    "type": "openpi_entity_gpt3",
                    "entity": "watermelon",
                    "attribute": "cut",
                    "change": "more likely"
                },
                {
                    "type": "openpi_entity_gpt3",
                    "entity": "watermelon",
                    "attribute": "whole",
                    "change": "less likely"
                },
                {
                    "type": "openpi_entity_gpt3",
                    "entity": "watermelon",
                    "attribute": "cut",
                    "change": "more likely"
                },
                {
                    "type": "openpi_entity_gpt3",
                    "entity": "watermelon",
                    "attribute": "whole",
                    "change": "less likely"
                },
                {
                    "type": "openpi_entity_gpt3",
                    "entity": "watermelon",
                    "attribute": "cut off",
                    "change": "more likely"
                },
                {
                    "type": "openpi_entity_gpt3",
                    "entity": "watermelon",
                    "attribute": "whole",
                    "change": "less likely"
                },
                {
                    "type": "openpi_entity_gpt3",
                    "entity": "top",
                    "attribute": "removed",
                    "change": "more likely"
                },
                {
                    "type": "openpi_entity_gpt3",
                    "entity": "top",
                    "attribute": "on the watermelon",
                    "change": "less likely"
                }
            ],
            [
                {
                    "type": "step",
                    "step": "Gently remove the top.\u00c2\u00a0"
                },
                {
                    "type": "openpi_entity_gpt3",
                    "entity": "watermelon",
                    "attribute": "uncovered",
                    "change": "more likely"
                },
                {
                    "type": "openpi_entity_gpt3",
                    "entity": "watermelon",
                    "attribute": "covered",
                    "change": "less likely"
                },
                {
                    "type": "openpi_entity_gpt3",
                    "entity": "top",
                    "attribute": "off the watermelon",
                    "change": "more likely"
                },
                {
                    "type": "openpi_entity_gpt3",
                    "entity": "top",
                    "attribute": "on the watermelon",
                    "change": "less likely"
                },
                {
                    "type": "openpi_entity_gpt3",
                    "entity": "top",
                    "attribute": "removed",
                    "change": "more likely"
                },
                {
                    "type": "openpi_entity_gpt3",
                    "entity": "top",
                    "attribute": "on the watermelon",
                    "change": "less likely"
                }
            ],
            [
                {
                    "type": "step",
                    "step": "Scoop out the watermelon flesh.\u00c2\u00a0"
                },
                {
                    "type": "openpi_entity_gpt3",
                    "entity": "watermelon",
                    "attribute": "empty",
                    "change": "more likely"
                },
                {
                    "type": "openpi_entity_gpt3",
                    "entity": "watermelon",
                    "attribute": "full",
                    "change": "less likely"
                },
                {
                    "type": "openpi_entity_gpt3",
                    "entity": "watermelon",
                    "attribute": "clean",
                    "change": "more likely"
                },
                {
                    "type": "openpi_entity_gpt3",
                    "entity": "watermelon",
                    "attribute": "dirty",
                    "change": "less likely"
                },
                {
                    "type": "openpi_entity_gpt3",
                    "entity": "watermelon flesh",
                    "attribute": "in a bowl",
                    "change": "more likely"
                },
                {
                    "type": "openpi_entity_gpt3",
                    "entity": "watermelon flesh",
                    "attribute": "on the watermelon",
                    "change": "less likely"
                },
                {
                    "type": "openpi_entity_gpt3",
                    "entity": "watermelon flesh",
                    "attribute": "in the bowl",
                    "change": "more likely"
                },
                {
                    "type": "openpi_entity_gpt3",
                    "entity": "watermelon flesh",
                    "attribute": "on the watermelon",
                    "change": "less likely"
                },
                {
                    "type": "openpi_entity_gpt3",
                    "entity": "bowl",
                    "attribute": "dirty",
                    "change": "more likely"
                },
                {
                    "type": "openpi_entity_gpt3",
                    "entity": "bowl",
                    "attribute": "clean",
                    "change": "less likely"
                },
                {
                    "type": "openpi_entity_gpt3",
                    "entity": "bowl",
                    "attribute": "heavier",
                    "change": "more likely"
                },
                {
                    "type": "openpi_entity_gpt3",
                    "entity": "bowl",
                    "attribute": "lighter",
                    "change": "less likely"
                },
                {
                    "type": "openpi_entity_gpt3",
                    "entity": "watermelon flesh",
                    "attribute": "scooped out",
                    "change": "more likely"
                },
                {
                    "type": "openpi_entity_gpt3",
                    "entity": "watermelon flesh",
                    "attribute": "whole",
                    "change": "less likely"
                }
            ],
            [
                {
                    "type": "step",
                    "step": "Save the goodies.\u00c2\u00a0"
                },
                {
                    "type": "openpi_entity_gpt3",
                    "entity": "watermelon",
                    "attribute": "in the container",
                    "change": "more likely"
                },
                {
                    "type": "openpi_entity_gpt3",
                    "entity": "watermelon",
                    "attribute": "in the hands",
                    "change": "less likely"
                },
                {
                    "type": "openpi_entity_gpt3",
                    "entity": "goodies",
                    "attribute": "in a container",
                    "change": "more likely"
                },
                {
                    "type": "openpi_entity_gpt3",
                    "entity": "goodies",
                    "attribute": "in the watermelon",
                    "change": "less likely"
                },
                {
                    "type": "openpi_entity_gpt3",
                    "entity": "watermelon",
                    "attribute": "out of the container",
                    "change": "more likely"
                },
                {
                    "type": "openpi_entity_gpt3",
                    "entity": "watermelon",
                    "attribute": "in the container",
                    "change": "less likely"
                }
            ],
            [
                {
                    "type": "step",
                    "step": "Clean out the inside of the watermelon using a wet paper towel.\u00c2\u00a0"
                },
                {
                    "type": "openpi_entity_gpt3",
                    "entity": "watermelon",
                    "attribute": "clean",
                    "change": "more likely"
                },
                {
                    "type": "openpi_entity_gpt3",
                    "entity": "watermelon",
                    "attribute": "dirty",
                    "change": "less likely"
                },
                {
                    "type": "openpi_entity_gpt3",
                    "entity": "the watermelon",
                    "attribute": "lighter",
                    "change": "more likely"
                },
                {
                    "type": "openpi_entity_gpt3",
                    "entity": "the watermelon",
                    "attribute": "heavier",
                    "change": "less likely"
                },
                {
                    "type": "openpi_entity_gpt3",
                    "entity": "watermelon",
                    "attribute": "clean",
                    "change": "more likely"
                },
                {
                    "type": "openpi_entity_gpt3",
                    "entity": "watermelon",
                    "attribute": "dirty",
                    "change": "less likely"
                },
                {
                    "type": "openpi_entity_gpt3",
                    "entity": "watermelon",
                    "attribute": "outside the watermelon",
                    "change": "more likely"
                },
                {
                    "type": "openpi_entity_gpt3",
                    "entity": "watermelon",
                    "attribute": "inside the watermelon",
                    "change": "less likely"
                },
                {
                    "type": "openpi_entity_gpt3",
                    "entity": "paper towel",
                    "attribute": "on the watermelon",
                    "change": "more likely"
                },
                {
                    "type": "openpi_entity_gpt3",
                    "entity": "paper towel",
                    "attribute": "in the drawer",
                    "change": "less likely"
                },
                {
                    "type": "openpi_entity_gpt3",
                    "entity": "paper towel",
                    "attribute": "in the hand",
                    "change": "more likely"
                },
                {
                    "type": "openpi_entity_gpt3",
                    "entity": "paper towel",
                    "attribute": "in the drawer",
                    "change": "less likely"
                },
                {
                    "type": "openpi_entity_gpt3",
                    "entity": "the paper towel",
                    "attribute": "wet",
                    "change": "more likely"
                },
                {
                    "type": "openpi_entity_gpt3",
                    "entity": "the paper towel",
                    "attribute": "dry",
                    "change": "less likely"
                },
                {
                    "type": "openpi_entity_gpt3",
                    "entity": "paper towel",
                    "attribute": "dirty",
                    "change": "more likely"
                },
                {
                    "type": "openpi_entity_gpt3",
                    "entity": "paper towel",
                    "attribute": "clean",
                    "change": "less likely"
                },
                {
                    "type": "openpi_entity_gpt3",
                    "entity": "the watermelon",
                    "attribute": "heavier",
                    "change": "more likely"
                },
                {
                    "type": "openpi_entity_gpt3",
                    "entity": "the watermelon",
                    "attribute": "lighter",
                    "change": "less likely"
                }
            ],
            [
                {
                    "type": "step",
                    "step": "Create the \"watermelon keg\".\u00c2\u00a0"
                }
            ],
            [
                {
                    "type": "step",
                    "step": "Fill the fruit keg with your favorite punch recipe."
                },
                {
                    "type": "openpi_entity_gpt3",
                    "entity": "punch",
                    "attribute": "in the fruit keg",
                    "change": "more likely"
                },
                {
                    "type": "openpi_entity_gpt3",
                    "entity": "punch",
                    "attribute": "in a bottle",
                    "change": "less likely"
                },
                {
                    "type": "openpi_entity_gpt3",
                    "entity": "fruit keg",
                    "attribute": "heavier",
                    "change": "more likely"
                },
                {
                    "type": "openpi_entity_gpt3",
                    "entity": "fruit keg",
                    "attribute": "lighter",
                    "change": "less likely"
                },
                {
                    "type": "openpi_entity_gpt3",
                    "entity": "fruit keg",
                    "attribute": "full",
                    "change": "more likely"
                },
                {
                    "type": "openpi_entity_gpt3",
                    "entity": "fruit keg",
                    "attribute": "empty",
                    "change": "less likely"
                },
                {
                    "type": "openpi_entity_gpt3",
                    "entity": "punch",
                    "attribute": "in fruit keg",
                    "change": "more likely"
                },
                {
                    "type": "openpi_entity_gpt3",
                    "entity": "punch",
                    "attribute": "in bottle",
                    "change": "less likely"
                }
            ],
            [
                {
                    "type": "step",
                    "step": "Test first!\u00c2\u00a0"
                }
            ],
            [
                {
                    "type": "step",
                    "step": "Add watermelon."
                },
                {
                    "type": "openpi_entity_gpt3",
                    "entity": "watermelon",
                    "attribute": "now in mixture",
                    "change": "more likely"
                },
                {
                    "type": "openpi_entity_gpt3",
                    "entity": "watermelon",
                    "attribute": "separate",
                    "change": "less likely"
                },
                {
                    "type": "openpi_entity_gpt3",
                    "entity": "the watermelon",
                    "attribute": "now lighter",
                    "change": "more likely"
                },
                {
                    "type": "openpi_entity_gpt3",
                    "entity": "the watermelon",
                    "attribute": "heavier",
                    "change": "less likely"
                },
                {
                    "type": "openpi_entity_gpt3",
                    "entity": "paper towel",
                    "attribute": "wet",
                    "change": "more likely"
                },
                {
                    "type": "openpi_entity_gpt3",
                    "entity": "paper towel",
                    "attribute": "dry",
                    "change": "less likely"
                },
                {
                    "type": "openpi_entity_gpt3",
                    "entity": "watermelon",
                    "attribute": "in the keg",
                    "change": "more likely"
                },
                {
                    "type": "openpi_entity_gpt3",
                    "entity": "watermelon",
                    "attribute": "on the counter",
                    "change": "less likely"
                },
                {
                    "type": "openpi_entity_gpt3",
                    "entity": "the keg",
                    "attribute": "now heavier",
                    "change": "more likely"
                },
                {
                    "type": "openpi_entity_gpt3",
                    "entity": "the keg",
                    "attribute": "lighter",
                    "change": "less likely"
                },
                {
                    "type": "openpi_entity_gpt3",
                    "entity": "the watermelon",
                    "attribute": "now emptier",
                    "change": "more likely"
                },
                {
                    "type": "openpi_entity_gpt3",
                    "entity": "the watermelon",
                    "attribute": "fuller",
                    "change": "less likely"
                }
            ],
            [
                {
                    "type": "step",
                    "step": "Place the watermelon keg on display.\u00c2\u00a0"
                }
            ]
        ]
    },
    "14": {
        "goal": "Making Simple Eggnog",
        "annotator": "kuan wei",
        "steps": [
            [
                {
                    "step": "Start."
                }
            ],
            [
                {
                    "type": "step",
                    "step": "Create the milk mixture."
                },
                {
                    "type": "openpi_entity_gpt3",
                    "entity": "milk",
                    "attribute": "in the bowl",
                    "change": "more likely"
                },
                {
                    "type": "openpi_entity_gpt3",
                    "entity": "milk",
                    "attribute": "in the fridge",
                    "change": "less likely"
                },
                {
                    "type": "openpi_entity_gpt3",
                    "entity": "milk",
                    "attribute": "in the bowl",
                    "change": "more likely"
                },
                {
                    "type": "openpi_entity_gpt3",
                    "entity": "milk",
                    "attribute": "in the carton",
                    "change": "less likely"
                },
                {
                    "type": "openpi_entity_gpt3",
                    "entity": "milk",
                    "attribute": "mixed with other ingredients",
                    "change": "more likely"
                },
                {
                    "type": "openpi_entity_gpt3",
                    "entity": "milk",
                    "attribute": "by itself",
                    "change": "less likely"
                },
                {
                    "type": "openpi_entity_gpt3",
                    "entity": "milk",
                    "attribute": "mixed with other ingredients",
                    "change": "more likely"
                },
                {
                    "type": "openpi_entity_gpt3",
                    "entity": "milk",
                    "attribute": "in carton",
                    "change": "less likely"
                },
                {
                    "type": "openpi_entity_gpt3",
                    "entity": "ingredients",
                    "attribute": "mixed",
                    "change": "more likely"
                },
                {
                    "type": "openpi_entity_gpt3",
                    "entity": "ingredients",
                    "attribute": "separate",
                    "change": "less likely"
                }
            ],
            [
                {
                    "type": "step",
                    "step": "Make the egg mixture."
                },
                {
                    "type": "openpi_entity_gpt3",
                    "entity": "milk",
                    "attribute": "in the bowl",
                    "change": "more likely"
                },
                {
                    "type": "openpi_entity_gpt3",
                    "entity": "milk",
                    "attribute": "in the container",
                    "change": "less likely"
                },
                {
                    "type": "openpi_entity_gpt3",
                    "entity": "milk",
                    "attribute": "mixed",
                    "change": "more likely"
                },
                {
                    "type": "openpi_entity_gpt3",
                    "entity": "milk",
                    "attribute": "separate",
                    "change": "less likely"
                },
                {
                    "type": "openpi_entity_gpt3",
                    "entity": "eggs",
                    "attribute": "in bowl",
                    "change": "more likely"
                },
                {
                    "type": "openpi_entity_gpt3",
                    "entity": "eggs",
                    "attribute": "in shell",
                    "change": "less likely"
                },
                {
                    "type": "openpi_entity_gpt3",
                    "entity": "egg mixture",
                    "attribute": "in a bowl",
                    "change": "more likely"
                },
                {
                    "type": "openpi_entity_gpt3",
                    "entity": "egg mixture",
                    "attribute": "in a container",
                    "change": "less likely"
                },
                {
                    "type": "openpi_entity_gpt3",
                    "entity": "egg mixture",
                    "attribute": "mixed",
                    "change": "more likely"
                },
                {
                    "type": "openpi_entity_gpt3",
                    "entity": "egg mixture",
                    "attribute": "separate",
                    "change": "less likely"
                },
                {
                    "type": "openpi_entity_gpt3",
                    "entity": "eggs",
                    "attribute": "in bowl",
                    "change": "more likely"
                },
                {
                    "type": "openpi_entity_gpt3",
                    "entity": "eggs",
                    "attribute": "in carton",
                    "change": "less likely"
                },
                {
                    "type": "openpi_entity_gpt3",
                    "entity": "carton",
                    "attribute": "on the table",
                    "change": "more likely"
                },
                {
                    "type": "openpi_entity_gpt3",
                    "entity": "carton",
                    "attribute": "in the pantry",
                    "change": "less likely"
                },
                {
                    "type": "openpi_entity_gpt3",
                    "entity": "eggshells",
                    "attribute": "in the bowl",
                    "change": "more likely"
                },
                {
                    "type": "openpi_entity_gpt3",
                    "entity": "eggshells",
                    "attribute": "in the carton",
                    "change": "less likely"
                },
                {
                    "type": "openpi_entity_gpt3",
                    "entity": "egg mixture",
                    "attribute": "mixed",
                    "change": "more likely"
                },
                {
                    "type": "openpi_entity_gpt3",
                    "entity": "egg mixture",
                    "attribute": "separate",
                    "change": "less likely"
                }
            ],
            [
                {
                    "type": "step",
                    "step": "Add the milk mixture slowly to the egg mixture and cook.\u00c2\u00a0"
                },
                {
                    "type": "openpi_entity_gpt3",
                    "entity": "pan",
                    "attribute": "hot",
                    "change": "more likely"
                },
                {
                    "type": "openpi_entity_gpt3",
                    "entity": "pan",
                    "attribute": "cool",
                    "change": "less likely"
                },
                {
                    "type": "openpi_entity_gpt3",
                    "entity": "mixture",
                    "attribute": "hot",
                    "change": "more likely"
                },
                {
                    "type": "openpi_entity_gpt3",
                    "entity": "mixture",
                    "attribute": "cool",
                    "change": "less likely"
                },
                {
                    "type": "openpi_entity_gpt3",
                    "entity": "milk mixture",
                    "attribute": "hot",
                    "change": "more likely"
                },
                {
                    "type": "openpi_entity_gpt3",
                    "entity": "milk mixture",
                    "attribute": "cold",
                    "change": "less likely"
                },
                {
                    "type": "openpi_entity_gpt3",
                    "entity": "milk mixture",
                    "attribute": "hot",
                    "change": "more likely"
                },
                {
                    "type": "openpi_entity_gpt3",
                    "entity": "milk mixture",
                    "attribute": "cool",
                    "change": "less likely"
                },
                {
                    "type": "openpi_entity_gpt3",
                    "entity": "eggs",
                    "attribute": "hot",
                    "change": "more likely"
                },
                {
                    "type": "openpi_entity_gpt3",
                    "entity": "eggs",
                    "attribute": "cool",
                    "change": "less likely"
                }
            ],
            [
                {
                    "type": "step",
                    "step": "Remove the eggnog from the burner."
                },
                {
                    "type": "openpi_entity_gpt3",
                    "entity": "eggnog",
                    "attribute": "cooling",
                    "change": "more likely"
                },
                {
                    "type": "openpi_entity_gpt3",
                    "entity": "eggnog",
                    "attribute": "hot",
                    "change": "less likely"
                },
                {
                    "type": "openpi_entity_gpt3",
                    "entity": "eggnog",
                    "attribute": "removed from the stove top",
                    "change": "more likely"
                },
                {
                    "type": "openpi_entity_gpt3",
                    "entity": "eggnog",
                    "attribute": "on the stove top",
                    "change": "less likely"
                },
                {
                    "type": "openpi_entity_gpt3",
                    "entity": "eggnog",
                    "attribute": "cooler",
                    "change": "more likely"
                },
                {
                    "type": "openpi_entity_gpt3",
                    "entity": "eggnog",
                    "attribute": "hot",
                    "change": "less likely"
                },
                {
                    "type": "openpi_entity_gpt3",
                    "entity": "eggnog",
                    "attribute": "hotter",
                    "change": "more likely"
                },
                {
                    "type": "openpi_entity_gpt3",
                    "entity": "eggnog",
                    "attribute": "hot",
                    "change": "less likely"
                }
            ],
            [
                {
                    "type": "step",
                    "step": "Add the remaining the ingredients.\u00c2\u00a0"
                },
                {
                    "type": "openpi_entity_gpt3",
                    "entity": "ingredients",
                    "attribute": "in pot",
                    "change": "more likely"
                },
                {
                    "type": "openpi_entity_gpt3",
                    "entity": "ingredients",
                    "attribute": "on counter",
                    "change": "less likely"
                },
                {
                    "type": "openpi_entity_gpt3",
                    "entity": "ingredients",
                    "attribute": "cooler",
                    "change": "more likely"
                },
                {
                    "type": "openpi_entity_gpt3",
                    "entity": "ingredients",
                    "attribute": "hot",
                    "change": "less likely"
                },
                {
                    "type": "openpi_entity_gpt3",
                    "entity": "ingredients",
                    "attribute": "in a pot",
                    "change": "more likely"
                },
                {
                    "type": "openpi_entity_gpt3",
                    "entity": "ingredients",
                    "attribute": "in a container",
                    "change": "less likely"
                },
                {
                    "type": "openpi_entity_gpt3",
                    "entity": "ingredients",
                    "attribute": "cold",
                    "change": "more likely"
                },
                {
                    "type": "openpi_entity_gpt3",
                    "entity": "ingredients",
                    "attribute": "hot",
                    "change": "less likely"
                },
                {
                    "type": "openpi_entity_gpt3",
                    "entity": "ingredients",
                    "attribute": "in the pot",
                    "change": "more likely"
                },
                {
                    "type": "openpi_entity_gpt3",
                    "entity": "ingredients",
                    "attribute": "in the bowl",
                    "change": "less likely"
                }
            ],
            [
                {
                    "type": "step",
                    "step": "Cover the eggnog tightly with plastic wrap."
                },
                {
                    "type": "openpi_entity_gpt3",
                    "entity": "eggnog",
                    "attribute": "cooler",
                    "change": "more likely"
                },
                {
                    "type": "openpi_entity_gpt3",
                    "entity": "eggnog",
                    "attribute": "hot",
                    "change": "less likely"
                },
                {
                    "type": "openpi_entity_gpt3",
                    "entity": "eggnog",
                    "attribute": "in the fridge",
                    "change": "more likely"
                },
                {
                    "type": "openpi_entity_gpt3",
                    "entity": "eggnog",
                    "attribute": "on the stove top",
                    "change": "less likely"
                },
                {
                    "type": "openpi_entity_gpt3",
                    "entity": "plastic wrap",
                    "attribute": "on the counter top",
                    "change": "more likely"
                },
                {
                    "type": "openpi_entity_gpt3",
                    "entity": "plastic wrap",
                    "attribute": "on the counter",
                    "change": "less likely"
                },
                {
                    "type": "openpi_entity_gpt3",
                    "entity": "eggnog",
                    "attribute": "covered",
                    "change": "more likely"
                },
                {
                    "type": "openpi_entity_gpt3",
                    "entity": "eggnog",
                    "attribute": "uncovered",
                    "change": "less likely"
                }
            ]
        ]
    },
    "15": {
        "goal": "How to Make Sbiten",
        "annotator": "kuan wei",
        "steps": [
            [
                {
                    "step": "Start."
                }
            ],
            [
                {
                    "type": "step",
                    "step": "Bring 10 1/4 cups of water to a boil."
                },
                {
                    "type": "entity",
                    "entity": "water",
                    "attribute": "cold",
                    "change": "less likely"
                },
                {
                    "type": "multihop",
                    "event": "I drink the water.",
                    "change": "less likely"
                },
                {
                    "type": "openpi_entity_gpt3",
                    "entity": "water",
                    "attribute": "hot",
                    "change": "more likely"
                },
                {
                    "type": "openpi_entity_gpt3",
                    "entity": "water",
                    "attribute": "cold",
                    "change": "less likely"
                },
                {
                    "type": "openpi_entity_gpt3",
                    "entity": "stove",
                    "attribute": "on",
                    "change": "more likely"
                },
                {
                    "type": "openpi_entity_gpt3",
                    "entity": "stove",
                    "attribute": "off",
                    "change": "less likely"
                },
                {
                    "type": "openpi_entity_gpt3",
                    "entity": "water",
                    "attribute": "hot",
                    "change": "more likely"
                },
                {
                    "type": "openpi_entity_gpt3",
                    "entity": "water",
                    "attribute": "cool",
                    "change": "less likely"
                },
                {
                    "type": "openpi_entity_gpt3",
                    "entity": "water",
                    "attribute": "boiling",
                    "change": "more likely"
                },
                {
                    "type": "openpi_entity_gpt3",
                    "entity": "water",
                    "attribute": "cold",
                    "change": "less likely"
                }
            ],
            [
                {
                    "type": "step",
                    "step": "Add the ginger, nutmeg, cloves, cinnamon, honey and\u00c2\u00a0homemade blackberry jam\u00c2\u00a0and stir gently."
                },
                {
                    "type": "openpi_entity_gpt3",
                    "entity": "ingredients",
                    "attribute": "in pot",
                    "change": "more likely"
                },
                {
                    "type": "openpi_entity_gpt3",
                    "entity": "ingredients",
                    "attribute": "in separate containers",
                    "change": "less likely"
                },
                {
                    "type": "openpi_entity_gpt3",
                    "entity": "ingredients",
                    "attribute": "hot",
                    "change": "more likely"
                },
                {
                    "type": "openpi_entity_gpt3",
                    "entity": "ingredients",
                    "attribute": "room temperature",
                    "change": "less likely"
                },
                {
                    "type": "openpi_entity_gpt3",
                    "entity": "ingredients",
                    "attribute": "in pot",
                    "change": "more likely"
                },
                {
                    "type": "openpi_entity_gpt3",
                    "entity": "ingredients",
                    "attribute": "in cooler",
                    "change": "less likely"
                },
                {
                    "type": "openpi_entity_gpt3",
                    "entity": "ingredients",
                    "attribute": "mixed",
                    "change": "more likely"
                },
                {
                    "type": "openpi_entity_gpt3",
                    "entity": "ingredients",
                    "attribute": "separate",
                    "change": "less likely"
                },
                {
                    "type": "openpi_entity_gpt3",
                    "entity": "ingredients",
                    "attribute": "in pot",
                    "change": "more likely"
                },
                {
                    "type": "openpi_entity_gpt3",
                    "entity": "ingredients",
                    "attribute": "in containers",
                    "change": "less likely"
                },
                {
                    "type": "openpi_entity_gpt3",
                    "entity": "ingredients",
                    "attribute": "hot",
                    "change": "more likely"
                },
                {
                    "type": "openpi_entity_gpt3",
                    "entity": "ingredients",
                    "attribute": "cool",
                    "change": "less likely"
                }
            ],
            [
                {
                    "type": "step",
                    "step": "Turn the heat down to about medium-low and bring it to a simmer.\u00c2\u00a0"
                },
                {
                    "type": "openpi_entity_gpt3",
                    "entity": "stove",
                    "attribute": "cool",
                    "change": "more likely"
                },
                {
                    "type": "openpi_entity_gpt3",
                    "entity": "stove",
                    "attribute": "hot",
                    "change": "less likely"
                },
                {
                    "type": "openpi_entity_gpt3",
                    "entity": "water",
                    "attribute": "simmering",
                    "change": "more likely"
                },
                {
                    "type": "openpi_entity_gpt3",
                    "entity": "water",
                    "attribute": "hot",
                    "change": "less likely"
                },
                {
                    "type": "openpi_entity_gpt3",
                    "entity": "stove",
                    "attribute": "medium",
                    "change": "more likely"
                },
                {
                    "type": "openpi_entity_gpt3",
                    "entity": "stove",
                    "attribute": "hot",
                    "change": "less likely"
                },
                {
                    "type": "openpi_entity_gpt3",
                    "entity": "water",
                    "attribute": "cool",
                    "change": "more likely"
                },
                {
                    "type": "openpi_entity_gpt3",
                    "entity": "water",
                    "attribute": "hot",
                    "change": "less likely"
                },
                {
                    "type": "openpi_entity_gpt3",
                    "entity": "water",
                    "attribute": "medium",
                    "change": "more likely"
                },
                {
                    "type": "openpi_entity_gpt3",
                    "entity": "water",
                    "attribute": "hot",
                    "change": "less likely"
                }
            ],
            [
                {
                    "type": "step",
                    "step": "Let cool for 2 minutes.\u00c2\u00a0"
                },
                {
                    "type": "multihop",
                    "event": "I drink the water.",
                    "change": "more likely"
                },
                {
                    "type": "openpi_entity_gpt3",
                    "entity": "mixture",
                    "attribute": "cool",
                    "change": "more likely"
                },
                {
                    "type": "openpi_entity_gpt3",
                    "entity": "mixture",
                    "attribute": "hot",
                    "change": "less likely"
                }
            ],
            [
                {
                    "type": "step",
                    "step": "Garnish with a\u00c2\u00a0homemade mint leaf candy\u00c2\u00a0and enjoy!"
                },
                {
                    "type": "openpi_entity_gpt3",
                    "entity": "garnish",
                    "attribute": "on the table",
                    "change": "more likely"
                },
                {
                    "type": "openpi_entity_gpt3",
                    "entity": "garnish",
                    "attribute": "on the side",
                    "change": "less likely"
                },
                {
                    "type": "openpi_entity_gpt3",
                    "entity": "drink",
                    "attribute": "garnished",
                    "change": "more likely"
                },
                {
                    "type": "openpi_entity_gpt3",
                    "entity": "drink",
                    "attribute": "plain",
                    "change": "less likely"
                }
            ]
        ]
    },
    "16": {
        "goal": "How to Cool a Hot Drink Quickly",
        "annotator": "kuan wei",
        "steps": [
            [
                {
                    "step": "Start."
                }
            ],
            [
                {
                    "type": "step",
                    "step": "Take your drink and pour it from one cup to the other cup."
                },
                {
                    "type": "openpi_entity_gpt3",
                    "entity": "cups",
                    "attribute": "full",
                    "change": "more likely"
                },
                {
                    "type": "openpi_entity_gpt3",
                    "entity": "cups",
                    "attribute": "empty",
                    "change": "less likely"
                },
                {
                    "type": "openpi_entity_gpt3",
                    "entity": "cups",
                    "attribute": "heavy",
                    "change": "more likely"
                },
                {
                    "type": "openpi_entity_gpt3",
                    "entity": "cups",
                    "attribute": "light",
                    "change": "less likely"
                },
                {
                    "type": "openpi_entity_gpt3",
                    "entity": "drink",
                    "attribute": "in the other cup",
                    "change": "more likely"
                },
                {
                    "type": "openpi_entity_gpt3",
                    "entity": "drink",
                    "attribute": "in one cup",
                    "change": "less likely"
                },
                {
                    "type": "openpi_entity_gpt3",
                    "entity": "drink",
                    "attribute": "in other cup",
                    "change": "more likely"
                },
                {
                    "type": "openpi_entity_gpt3",
                    "entity": "drink",
                    "attribute": "in one cup",
                    "change": "less likely"
                }
            ],
            [
                {
                    "type": "step",
                    "step": "Repeat until your drink has cooled down."
                },
                {
                    "type": "entity",
                    "entity": "drink",
                    "attribute": "cold",
                    "change": "more likely"
                },
                {
                    "type": "multihop",
                    "event": "I drink the drink.",
                    "change": "more likely"
                },
                {
                    "type": "openpi_entity_gpt3",
                    "entity": "drink",
                    "attribute": "cooled",
                    "change": "more likely"
                },
                {
                    "type": "openpi_entity_gpt3",
                    "entity": "drink",
                    "attribute": "warm",
                    "change": "less likely"
                },
                {
                    "type": "openpi_entity_gpt3",
                    "entity": "drink",
                    "attribute": "cool",
                    "change": "more likely"
                },
                {
                    "type": "openpi_entity_gpt3",
                    "entity": "drink",
                    "attribute": "warm",
                    "change": "less likely"
                }
            ],
            [
                {
                    "type": "step",
                    "step": "Once it has cooled down, enjoy your drink."
                },
                {
                    "type": "openpi_entity_gpt3",
                    "entity": "drink",
                    "attribute": "cool",
                    "change": "more likely"
                },
                {
                    "type": "openpi_entity_gpt3",
                    "entity": "drink",
                    "attribute": "warm",
                    "change": "less likely"
                },
                {
                    "type": "openpi_entity_gpt3",
                    "entity": "drink",
                    "attribute": "in mouth",
                    "change": "more likely"
                },
                {
                    "type": "openpi_entity_gpt3",
                    "entity": "drink",
                    "attribute": "in cup",
                    "change": "less likely"
                },
                {
                    "type": "openpi_entity_gpt3",
                    "entity": "drink",
                    "attribute": "melted",
                    "change": "more likely"
                },
                {
                    "type": "openpi_entity_gpt3",
                    "entity": "drink",
                    "attribute": "full of ice",
                    "change": "less likely"
                },
                {
                    "type": "openpi_entity_gpt3",
                    "entity": "drink",
                    "attribute": "cool",
                    "change": "more likely"
                },
                {
                    "type": "openpi_entity_gpt3",
                    "entity": "drink",
                    "attribute": "warm",
                    "change": "less likely"
                }
            ]
        ]
    },
    "17": {
        "goal": "How to Make Hot Cocoa",
        "annotator": "kuan wei",
        "steps": [
            [
                {
                    "step": "Start."
                }
            ],
            [
                {
                    "type": "step",
                    "step": "Put the milk, sugar, and cocoa powder in a saucepan."
                },
                {
                    "type": "openpi_entity_gpt3",
                    "entity": "milk",
                    "attribute": "in pan",
                    "change": "more likely"
                },
                {
                    "type": "openpi_entity_gpt3",
                    "entity": "milk",
                    "attribute": "in fridge",
                    "change": "less likely"
                },
                {
                    "type": "openpi_entity_gpt3",
                    "entity": "milk",
                    "attribute": "in pan",
                    "change": "more likely"
                },
                {
                    "type": "openpi_entity_gpt3",
                    "entity": "milk",
                    "attribute": "in carton",
                    "change": "less likely"
                },
                {
                    "type": "openpi_entity_gpt3",
                    "entity": "sugar",
                    "attribute": "in pan",
                    "change": "more likely"
                },
                {
                    "type": "openpi_entity_gpt3",
                    "entity": "sugar",
                    "attribute": "in bag",
                    "change": "less likely"
                },
                {
                    "type": "openpi_entity_gpt3",
                    "entity": "cocoa powder",
                    "attribute": "in pan",
                    "change": "more likely"
                },
                {
                    "type": "openpi_entity_gpt3",
                    "entity": "cocoa powder",
                    "attribute": "in bag",
                    "change": "less likely"
                },
                {
                    "type": "openpi_entity_gpt3",
                    "entity": "cocoa powder",
                    "attribute": "in pan",
                    "change": "more likely"
                },
                {
                    "type": "openpi_entity_gpt3",
                    "entity": "cocoa powder",
                    "attribute": "in fridge",
                    "change": "less likely"
                }
            ],
            [
                {
                    "type": "step",
                    "step": "Simmer the hot cocoa over medium heat for about 8 to 10 minutes."
                },
                {
                    "type": "openpi_entity_gpt3",
                    "entity": "mixture",
                    "attribute": "warmer",
                    "change": "more likely"
                },
                {
                    "type": "openpi_entity_gpt3",
                    "entity": "mixture",
                    "attribute": "cooler",
                    "change": "less likely"
                },
                {
                    "type": "openpi_entity_gpt3",
                    "entity": "milk",
                    "attribute": "hot",
                    "change": "more likely"
                },
                {
                    "type": "openpi_entity_gpt3",
                    "entity": "milk",
                    "attribute": "cool",
                    "change": "less likely"
                },
                {
                    "type": "openpi_entity_gpt3",
                    "entity": "cocoa",
                    "attribute": "hot",
                    "change": "more likely"
                },
                {
                    "type": "openpi_entity_gpt3",
                    "entity": "cocoa",
                    "attribute": "cool",
                    "change": "less likely"
                },
                {
                    "type": "openpi_entity_gpt3",
                    "entity": "pan",
                    "attribute": "hot",
                    "change": "more likely"
                },
                {
                    "type": "openpi_entity_gpt3",
                    "entity": "pan",
                    "attribute": "cool",
                    "change": "less likely"
                },
                {
                    "type": "openpi_entity_gpt3",
                    "entity": "milk",
                    "attribute": "hot",
                    "change": "more likely"
                },
                {
                    "type": "openpi_entity_gpt3",
                    "entity": "milk",
                    "attribute": "cold",
                    "change": "less likely"
                }
            ],
            [
                {
                    "type": "step",
                    "step": "Stir in the vanilla and pour the cocoa into mugs.\u00c2\u00a0"
                },
                {
                    "type": "entity",
                    "entity": "the cocoa",
                    "attribute": "in mugs",
                    "change": "more likely"
                },
                {
                    "type": "multihop",
                    "event": "I drink the cocoa from mugs.",
                    "change": "more likely"
                },
                {
                    "type": "openpi_entity_gpt3",
                    "entity": "cocoa",
                    "attribute": "in a mug",
                    "change": "more likely"
                },
                {
                    "type": "openpi_entity_gpt3",
                    "entity": "cocoa",
                    "attribute": "in a container",
                    "change": "less likely"
                },
                {
                    "type": "openpi_entity_gpt3",
                    "entity": "vanilla",
                    "attribute": "in",
                    "change": "more likely"
                },
                {
                    "type": "openpi_entity_gpt3",
                    "entity": "vanilla",
                    "attribute": "in a container",
                    "change": "less likely"
                },
                {
                    "type": "openpi_entity_gpt3",
                    "entity": "cocoa",
                    "attribute": "in mug",
                    "change": "more likely"
                },
                {
                    "type": "openpi_entity_gpt3",
                    "entity": "cocoa",
                    "attribute": "in pan",
                    "change": "less likely"
                },
                {
                    "type": "openpi_entity_gpt3",
                    "entity": "cocoa",
                    "attribute": "in mug",
                    "change": "more likely"
                },
                {
                    "type": "openpi_entity_gpt3",
                    "entity": "cocoa",
                    "attribute": "in container",
                    "change": "less likely"
                },
                {
                    "type": "openpi_entity_gpt3",
                    "entity": "vanilla",
                    "attribute": "in the mug",
                    "change": "more likely"
                },
                {
                    "type": "openpi_entity_gpt3",
                    "entity": "vanilla",
                    "attribute": "in a container",
                    "change": "less likely"
                },
                {
                    "type": "openpi_entity_gpt3",
                    "entity": "vanilla",
                    "attribute": "in pan",
                    "change": "more likely"
                },
                {
                    "type": "openpi_entity_gpt3",
                    "entity": "vanilla",
                    "attribute": "in container",
                    "change": "less likely"
                }
            ],
            [
                {
                    "type": "step",
                    "step": "Top the hot cocoa with marshmallows or whipped cream before serving."
                },
                {
                    "type": "openpi_entity_gpt3",
                    "entity": "whipped cream",
                    "attribute": "on the mug",
                    "change": "more likely"
                },
                {
                    "type": "openpi_entity_gpt3",
                    "entity": "whipped cream",
                    "attribute": "in a container",
                    "change": "less likely"
                },
                {
                    "type": "openpi_entity_gpt3",
                    "entity": "marshmallows",
                    "attribute": "on the hot cocoa",
                    "change": "more likely"
                },
                {
                    "type": "openpi_entity_gpt3",
                    "entity": "marshmallows",
                    "attribute": "in a container",
                    "change": "less likely"
                },
                {
                    "type": "openpi_entity_gpt3",
                    "entity": "marshmallows",
                    "attribute": "on the mug",
                    "change": "more likely"
                },
                {
                    "type": "openpi_entity_gpt3",
                    "entity": "marshmallows",
                    "attribute": "in a container",
                    "change": "less likely"
                }
            ]
        ]
    },
    "18": {
        "goal": "How to Make Hot Cocoa From Chocolate",
        "annotator": "kuan wei",
        "steps": [
            [
                {
                    "step": "Start."
                }
            ],
            [
                {
                    "type": "step",
                    "step": "Chop\u00c2\u00a04 ounces (112 g) of bittersweet or semisweet chocolate."
                },
                {
                    "type": "openpi_entity_gpt3",
                    "entity": "knife",
                    "attribute": "dirty",
                    "change": "more likely"
                },
                {
                    "type": "openpi_entity_gpt3",
                    "entity": "knife",
                    "attribute": "clean",
                    "change": "less likely"
                },
                {
                    "type": "openpi_entity_gpt3",
                    "entity": "chocolate",
                    "attribute": "chopped",
                    "change": "more likely"
                },
                {
                    "type": "openpi_entity_gpt3",
                    "entity": "chocolate",
                    "attribute": "whole",
                    "change": "less likely"
                },
                {
                    "type": "openpi_entity_gpt3",
                    "entity": "chopping tool",
                    "attribute": "dirty",
                    "change": "more likely"
                },
                {
                    "type": "openpi_entity_gpt3",
                    "entity": "chopping tool",
                    "attribute": "clean",
                    "change": "less likely"
                },
                {
                    "type": "openpi_entity_gpt3",
                    "entity": "chocolate",
                    "attribute": "chopped",
                    "change": "more likely"
                },
                {
                    "type": "openpi_entity_gpt3",
                    "entity": "chocolate",
                    "attribute": "whole",
                    "change": "less likely"
                },
                {
                    "type": "openpi_entity_gpt3",
                    "entity": "chocolate container",
                    "attribute": "lighter",
                    "change": "more likely"
                },
                {
                    "type": "openpi_entity_gpt3",
                    "entity": "chocolate container",
                    "attribute": "heavier",
                    "change": "less likely"
                },
                {
                    "type": "openpi_entity_gpt3",
                    "entity": "chocolate",
                    "attribute": "in the trash",
                    "change": "more likely"
                },
                {
                    "type": "openpi_entity_gpt3",
                    "entity": "chocolate",
                    "attribute": "in the container",
                    "change": "less likely"
                },
                {
                    "type": "openpi_entity_gpt3",
                    "entity": "chocolate",
                    "attribute": "chopped up",
                    "change": "more likely"
                },
                {
                    "type": "openpi_entity_gpt3",
                    "entity": "chocolate",
                    "attribute": "whole",
                    "change": "less likely"
                }
            ],
            [
                {
                    "type": "step",
                    "step": "Heat the milk and salt to a simmer over medium heat.\u00c2\u00a0"
                },
                {
                    "type": "openpi_entity_gpt3",
                    "entity": "milk",
                    "attribute": "hot",
                    "change": "more likely"
                },
                {
                    "type": "openpi_entity_gpt3",
                    "entity": "milk",
                    "attribute": "cool",
                    "change": "less likely"
                },
                {
                    "type": "openpi_entity_gpt3",
                    "entity": "salt",
                    "attribute": "hot",
                    "change": "more likely"
                },
                {
                    "type": "openpi_entity_gpt3",
                    "entity": "salt",
                    "attribute": "cool",
                    "change": "less likely"
                }
            ],
            [
                {
                    "type": "step",
                    "step": "Whisk in the chopped chocolate.\u00c2\u00a0"
                },
                {
                    "type": "entity",
                    "entity": "chocolate",
                    "attribute": "solid",
                    "change": "less likely"
                },
                {
                    "type": "multihop",
                    "event": "I cut the chocolate.",
                    "change": "less likely"
                },
                {
                    "type": "openpi_entity_gpt3",
                    "entity": "whisk",
                    "attribute": "in the hand",
                    "change": "more likely"
                },
                {
                    "type": "openpi_entity_gpt3",
                    "entity": "whisk",
                    "attribute": "in the cupboard",
                    "change": "less likely"
                },
                {
                    "type": "openpi_entity_gpt3",
                    "entity": "chocolate",
                    "attribute": "in the cup",
                    "change": "more likely"
                },
                {
                    "type": "openpi_entity_gpt3",
                    "entity": "chocolate",
                    "attribute": "in the bowl",
                    "change": "less likely"
                },
                {
                    "type": "openpi_entity_gpt3",
                    "entity": "chocolate",
                    "attribute": "in the saucer",
                    "change": "more likely"
                },
                {
                    "type": "openpi_entity_gpt3",
                    "entity": "chocolate",
                    "attribute": "in the bowl",
                    "change": "less likely"
                },
                {
                    "type": "openpi_entity_gpt3",
                    "entity": "chocolate",
                    "attribute": "mixed",
                    "change": "more likely"
                },
                {
                    "type": "openpi_entity_gpt3",
                    "entity": "chocolate",
                    "attribute": "separate",
                    "change": "less likely"
                },
                {
                    "type": "openpi_entity_gpt3",
                    "entity": "chocolate",
                    "attribute": "in the cup or saucer",
                    "change": "more likely"
                },
                {
                    "type": "openpi_entity_gpt3",
                    "entity": "chocolate",
                    "attribute": "in the bowl",
                    "change": "less likely"
                },
                {
                    "type": "openpi_entity_gpt3",
                    "entity": "chocolate",
                    "attribute": "chopped",
                    "change": "more likely"
                },
                {
                    "type": "openpi_entity_gpt3",
                    "entity": "chocolate",
                    "attribute": "whole",
                    "change": "less likely"
                }
            ],
            [
                {
                    "type": "step",
                    "step": "Turn off the burner and stir in vanilla.\u00c2\u00a0"
                },
                {
                    "type": "openpi_entity_gpt3",
                    "entity": "vanilla",
                    "attribute": "hot",
                    "change": "more likely"
                },
                {
                    "type": "openpi_entity_gpt3",
                    "entity": "vanilla",
                    "attribute": "cool",
                    "change": "less likely"
                },
                {
                    "type": "openpi_entity_gpt3",
                    "entity": "milk",
                    "attribute": "cool",
                    "change": "more likely"
                },
                {
                    "type": "openpi_entity_gpt3",
                    "entity": "milk",
                    "attribute": "hot",
                    "change": "less likely"
                },
                {
                    "type": "openpi_entity_gpt3",
                    "entity": "vanilla",
                    "attribute": "hot",
                    "change": "more likely"
                },
                {
                    "type": "openpi_entity_gpt3",
                    "entity": "vanilla",
                    "attribute": "room temperature",
                    "change": "less likely"
                },
                {
                    "type": "openpi_entity_gpt3",
                    "entity": "chocolate",
                    "attribute": "cool",
                    "change": "more likely"
                },
                {
                    "type": "openpi_entity_gpt3",
                    "entity": "chocolate",
                    "attribute": "hot",
                    "change": "less likely"
                },
                {
                    "type": "openpi_entity_gpt3",
                    "entity": "burner",
                    "attribute": "off",
                    "change": "more likely"
                },
                {
                    "type": "openpi_entity_gpt3",
                    "entity": "burner",
                    "attribute": "on",
                    "change": "less likely"
                }
            ],
            [
                {
                    "type": "step",
                    "step": "Pour the hot chocolate into mugs and serve them with\u00c2\u00a0whipped cream.\u00c2\u00a0"
                },
                {
                    "type": "openpi_entity_gpt3",
                    "entity": "hot chocolate",
                    "attribute": "in table",
                    "change": "more likely"
                },
                {
                    "type": "openpi_entity_gpt3",
                    "entity": "hot chocolate",
                    "attribute": "in mug",
                    "change": "less likely"
                },
                {
                    "type": "openpi_entity_gpt3",
                    "entity": "mugs",
                    "attribute": "heavier",
                    "change": "more likely"
                },
                {
                    "type": "openpi_entity_gpt3",
                    "entity": "mugs",
                    "attribute": "lighter",
                    "change": "less likely"
                },
                {
                    "type": "openpi_entity_gpt3",
                    "entity": "mugs",
                    "attribute": "full",
                    "change": "more likely"
                },
                {
                    "type": "openpi_entity_gpt3",
                    "entity": "mugs",
                    "attribute": "empty",
                    "change": "less likely"
                },
                {
                    "type": "openpi_entity_gpt3",
                    "entity": "whipped cream",
                    "attribute": "on the mugs",
                    "change": "more likely"
                },
                {
                    "type": "openpi_entity_gpt3",
                    "entity": "whipped cream",
                    "attribute": "in the fridge",
                    "change": "less likely"
                },
                {
                    "type": "openpi_entity_gpt3",
                    "entity": "mugs",
                    "attribute": "on the table",
                    "change": "more likely"
                },
                {
                    "type": "openpi_entity_gpt3",
                    "entity": "mugs",
                    "attribute": "in the cupboard",
                    "change": "less likely"
                },
                {
                    "type": "openpi_entity_gpt3",
                    "entity": "mugs",
                    "attribute": "on the table",
                    "change": "more likely"
                },
                {
                    "type": "openpi_entity_gpt3",
                    "entity": "mugs",
                    "attribute": "in the cabinet",
                    "change": "less likely"
                }
            ]
        ]
    },
    "19": {
        "goal": "Single-Serving Microwave Cocoa",
        "annotator": "kuan wei",
        "steps": [
            [
                {
                    "step": "Start."
                }
            ],
            [
                {
                    "type": "step",
                    "step": "Mix the cocoa, sugar, and salt together in a mug."
                },
                {
                    "type": "openpi_entity_gpt3",
                    "entity": "sugar",
                    "attribute": "in mug",
                    "change": "more likely"
                },
                {
                    "type": "openpi_entity_gpt3",
                    "entity": "sugar",
                    "attribute": "in container",
                    "change": "less likely"
                },
                {
                    "type": "openpi_entity_gpt3",
                    "entity": "salt",
                    "attribute": "in mug",
                    "change": "more likely"
                },
                {
                    "type": "openpi_entity_gpt3",
                    "entity": "salt",
                    "attribute": "in container",
                    "change": "less likely"
                },
                {
                    "type": "openpi_entity_gpt3",
                    "entity": "cocoa",
                    "attribute": "in mug",
                    "change": "more likely"
                },
                {
                    "type": "openpi_entity_gpt3",
                    "entity": "cocoa",
                    "attribute": "in container",
                    "change": "less likely"
                }
            ],
            [
                {
                    "type": "step",
                    "step": "Stir in 1 cup (240\u00c2\u00a0ml) of milk."
                },
                {
                    "type": "entity",
                    "entity": "sugar",
                    "attribute": "in powder form",
                    "change": "less likely"
                },
                {
                    "type": "openpi_entity_gpt3",
                    "entity": "milk",
                    "attribute": "in mug",
                    "change": "more likely"
                },
                {
                    "type": "openpi_entity_gpt3",
                    "entity": "milk",
                    "attribute": "in a container",
                    "change": "less likely"
                },
                {
                    "type": "openpi_entity_gpt3",
                    "entity": "milk",
                    "attribute": "in mug",
                    "change": "more likely"
                },
                {
                    "type": "openpi_entity_gpt3",
                    "entity": "milk",
                    "attribute": "in container",
                    "change": "less likely"
                },
                {
                    "type": "openpi_entity_gpt3",
                    "entity": "milk",
                    "attribute": "in the mug",
                    "change": "more likely"
                },
                {
                    "type": "openpi_entity_gpt3",
                    "entity": "milk",
                    "attribute": "in a container",
                    "change": "less likely"
                }
            ],
            [
                {
                    "type": "step",
                    "step": "Microwave the mixture for 1 minute."
                },
                {
                    "type": "openpi_entity_gpt3",
                    "entity": "microwave",
                    "attribute": "hot",
                    "change": "more likely"
                },
                {
                    "type": "openpi_entity_gpt3",
                    "entity": "microwave",
                    "attribute": "cold",
                    "change": "less likely"
                },
                {
                    "type": "openpi_entity_gpt3",
                    "entity": "microwave",
                    "attribute": "on",
                    "change": "more likely"
                },
                {
                    "type": "openpi_entity_gpt3",
                    "entity": "microwave",
                    "attribute": "off",
                    "change": "less likely"
                },
                {
                    "type": "openpi_entity_gpt3",
                    "entity": "mixture",
                    "attribute": "warmer",
                    "change": "more likely"
                },
                {
                    "type": "openpi_entity_gpt3",
                    "entity": "mixture",
                    "attribute": "cooler",
                    "change": "less likely"
                },
                {
                    "type": "openpi_entity_gpt3",
                    "entity": "mug",
                    "attribute": "hot",
                    "change": "more likely"
                },
                {
                    "type": "openpi_entity_gpt3",
                    "entity": "mug",
                    "attribute": "cold",
                    "change": "less likely"
                },
                {
                    "type": "openpi_entity_gpt3",
                    "entity": "mixture",
                    "attribute": "hot",
                    "change": "more likely"
                },
                {
                    "type": "openpi_entity_gpt3",
                    "entity": "mixture",
                    "attribute": "room temperature",
                    "change": "less likely"
                },
                {
                    "type": "openpi_entity_gpt3",
                    "entity": "mixture",
                    "attribute": "warm",
                    "change": "more likely"
                },
                {
                    "type": "openpi_entity_gpt3",
                    "entity": "mixture",
                    "attribute": "cold",
                    "change": "less likely"
                },
                {
                    "type": "openpi_entity_gpt3",
                    "entity": "microwave",
                    "attribute": "on",
                    "change": "more likely"
                },
                {
                    "type": "openpi_entity_gpt3",
                    "entity": "microwave",
                    "attribute": "off",
                    "change": "less likely"
                },
                {
                    "type": "openpi_entity_gpt3",
                    "entity": "mixture",
                    "attribute": "hot",
                    "change": "more likely"
                },
                {
                    "type": "openpi_entity_gpt3",
                    "entity": "mixture",
                    "attribute": "cold",
                    "change": "less likely"
                }
            ],
            [
                {
                    "type": "step",
                    "step": "Stir vanilla into the cocoa before drinking it.\u00c2\u00a0"
                },
                {
                    "type": "multihop",
                    "event": "I drink the sugar.",
                    "change": "more likely"
                },
                {
                    "type": "openpi_entity_gpt3",
                    "entity": "mixture",
                    "attribute": "in mouth",
                    "change": "more likely"
                },
                {
                    "type": "openpi_entity_gpt3",
                    "entity": "mixture",
                    "attribute": "in mug",
                    "change": "less likely"
                },
                {
                    "type": "openpi_entity_gpt3",
                    "entity": "vanilla",
                    "attribute": "in mug",
                    "change": "more likely"
                },
                {
                    "type": "openpi_entity_gpt3",
                    "entity": "vanilla",
                    "attribute": "in container",
                    "change": "less likely"
                },
                {
                    "type": "openpi_entity_gpt3",
                    "entity": "vanilla",
                    "attribute": "in the mug",
                    "change": "more likely"
                },
                {
                    "type": "openpi_entity_gpt3",
                    "entity": "vanilla",
                    "attribute": "in the container",
                    "change": "less likely"
                }
            ]
        ]
    },
    "20": {
        "goal": "Make Cold Chocolate Drink",
        "annotator": "kuan wei",
        "steps": [
            [
                {
                    "step": "Start."
                }
            ],
            [
                {
                    "type": "step",
                    "step": "Start with a mug of milk or water."
                },
                {
                    "type": "openpi_entity_gpt3",
                    "entity": "mug",
                    "attribute": "on the table",
                    "change": "more likely"
                },
                {
                    "type": "openpi_entity_gpt3",
                    "entity": "mug",
                    "attribute": "in the cupboard",
                    "change": "less likely"
                },
                {
                    "type": "openpi_entity_gpt3",
                    "entity": "milk",
                    "attribute": "in the mug",
                    "change": "more likely"
                },
                {
                    "type": "openpi_entity_gpt3",
                    "entity": "milk",
                    "attribute": "in the fridge",
                    "change": "less likely"
                },
                {
                    "type": "openpi_entity_gpt3",
                    "entity": "water",
                    "attribute": "in the mug",
                    "change": "more likely"
                },
                {
                    "type": "openpi_entity_gpt3",
                    "entity": "water",
                    "attribute": "in the faucet",
                    "change": "less likely"
                },
                {
                    "type": "openpi_entity_gpt3",
                    "entity": "mug",
                    "attribute": "on table",
                    "change": "more likely"
                },
                {
                    "type": "openpi_entity_gpt3",
                    "entity": "mug",
                    "attribute": "in cupboard",
                    "change": "less likely"
                }
            ],
            [
                {
                    "type": "step",
                    "step": "Mix in cocoa powder and sugar to taste.\u00c2\u00a0"
                },
                {
                    "type": "openpi_entity_gpt3",
                    "entity": "cocoa powder",
                    "attribute": "in the mug",
                    "change": "more likely"
                },
                {
                    "type": "openpi_entity_gpt3",
                    "entity": "cocoa powder",
                    "attribute": "in a container",
                    "change": "less likely"
                },
                {
                    "type": "openpi_entity_gpt3",
                    "entity": "sugar",
                    "attribute": "in the mug",
                    "change": "more likely"
                },
                {
                    "type": "openpi_entity_gpt3",
                    "entity": "sugar",
                    "attribute": "in a container",
                    "change": "less likely"
                },
                {
                    "type": "openpi_entity_gpt3",
                    "entity": "mixture",
                    "attribute": "chocolate tasting",
                    "change": "more likely"
                },
                {
                    "type": "openpi_entity_gpt3",
                    "entity": "mixture",
                    "attribute": "bland",
                    "change": "less likely"
                },
                {
                    "type": "openpi_entity_gpt3",
                    "entity": "mixture",
                    "attribute": "chocolate tasting",
                    "change": "more likely"
                },
                {
                    "type": "openpi_entity_gpt3",
                    "entity": "mixture",
                    "attribute": "plain",
                    "change": "less likely"
                }
            ],
            [
                {
                    "type": "step",
                    "step": "Microwave for 30\u00e2\u20ac\u201c45 seconds.\u00c2\u00a0"
                },
                {
                    "type": "entity",
                    "entity": "the milk",
                    "attribute": "cold",
                    "change": "less likely"
                },
                {
                    "type": "multihop",
                    "event": "I drink the milk.",
                    "change": "less likely"
                },
                {
                    "type": "openpi_entity_gpt3",
                    "entity": "microwave",
                    "attribute": "hot",
                    "change": "more likely"
                },
                {
                    "type": "openpi_entity_gpt3",
                    "entity": "microwave",
                    "attribute": "cold",
                    "change": "less likely"
                },
                {
                    "type": "openpi_entity_gpt3",
                    "entity": "microwave",
                    "attribute": "on",
                    "change": "more likely"
                },
                {
                    "type": "openpi_entity_gpt3",
                    "entity": "microwave",
                    "attribute": "off",
                    "change": "less likely"
                },
                {
                    "type": "openpi_entity_gpt3",
                    "entity": "milk",
                    "attribute": "hot",
                    "change": "more likely"
                },
                {
                    "type": "openpi_entity_gpt3",
                    "entity": "milk",
                    "attribute": "room temperature",
                    "change": "less likely"
                },
                {
                    "type": "openpi_entity_gpt3",
                    "entity": "sugar",
                    "attribute": "hot",
                    "change": "more likely"
                },
                {
                    "type": "openpi_entity_gpt3",
                    "entity": "sugar",
                    "attribute": "room temperature",
                    "change": "less likely"
                },
                {
                    "type": "openpi_entity_gpt3",
                    "entity": "microwave",
                    "attribute": "",
                    "change": "more likely"
                },
                {
                    "type": "openpi_entity_gpt3",
                    "entity": "microwave",
                    "attribute": "cold",
                    "change": "less likely"
                },
                {
                    "type": "openpi_entity_gpt3",
                    "entity": "cocoa",
                    "attribute": "hot",
                    "change": "more likely"
                },
                {
                    "type": "openpi_entity_gpt3",
                    "entity": "cocoa",
                    "attribute": "room temperature",
                    "change": "less likely"
                }
            ],
            [
                {
                    "type": "step",
                    "step": "Chill for 30\u00e2\u20ac\u201c60 minutes.\u00c2\u00a0"
                },
                {
                    "type": "entity",
                    "entity": "the milk",
                    "attribute": "cold",
                    "change": "more likely"
                },
                {
                    "type": "multihop",
                    "event": "I drink the milk.",
                    "change": "more likely"
                },
                {
                    "type": "openpi_entity_gpt3",
                    "entity": "drink",
                    "attribute": "cold",
                    "change": "more likely"
                },
                {
                    "type": "openpi_entity_gpt3",
                    "entity": "drink",
                    "attribute": "warm",
                    "change": "less likely"
                },
                {
                    "type": "openpi_entity_gpt3",
                    "entity": "drink",
                    "attribute": "cold",
                    "change": "more likely"
                },
                {
                    "type": "openpi_entity_gpt3",
                    "entity": "drink",
                    "attribute": "hot",
                    "change": "less likely"
                },
                {
                    "type": "openpi_entity_gpt3",
                    "entity": "glass",
                    "attribute": "cold",
                    "change": "more likely"
                },
                {
                    "type": "openpi_entity_gpt3",
                    "entity": "glass",
                    "attribute": "warm",
                    "change": "less likely"
                }
            ],
            [
                {
                    "type": "step",
                    "step": "Add ice."
                },
                {
                    "type": "openpi_entity_gpt3",
                    "entity": "drink",
                    "attribute": "cold",
                    "change": "more likely"
                },
                {
                    "type": "openpi_entity_gpt3",
                    "entity": "drink",
                    "attribute": "room temperature",
                    "change": "less likely"
                },
                {
                    "type": "openpi_entity_gpt3",
                    "entity": "drink",
                    "attribute": "cold",
                    "change": "more likely"
                },
                {
                    "type": "openpi_entity_gpt3",
                    "entity": "drink",
                    "attribute": "warm",
                    "change": "less likely"
                },
                {
                    "type": "openpi_entity_gpt3",
                    "entity": "ice",
                    "attribute": "in the drink",
                    "change": "more likely"
                },
                {
                    "type": "openpi_entity_gpt3",
                    "entity": "ice",
                    "attribute": "in the freezer",
                    "change": "less likely"
                }
            ]
        ]
    },
    "21": {
        "goal": "\ufeffHow to Make Pancakes",
        "annotator": "Pujun Guan",
        "steps": [
            [
                {
                    "step": "Start."
                }
            ],
            [
                {
                    "type": "step",
                    "step": "Crack the eggs into a bowl and beat until creamy. "
                },
                {
                    "type": "openpi_entity_gpt3",
                    "entity": "bowl",
                    "attribute": "full",
                    "change": "more likely"
                },
                {
                    "type": "openpi_entity_gpt3",
                    "entity": "bowl",
                    "attribute": "empty",
                    "change": "less likely"
                },
                {
                    "type": "openpi_entity_gpt3",
                    "entity": "eggshells",
                    "attribute": "in the bowl",
                    "change": "more likely"
                },
                {
                    "type": "openpi_entity_gpt3",
                    "entity": "eggshells",
                    "attribute": "in the egg",
                    "change": "less likely"
                },
                {
                    "type": "openpi_entity_gpt3",
                    "entity": "bowl",
                    "attribute": "dirty",
                    "change": "more likely"
                },
                {
                    "type": "openpi_entity_gpt3",
                    "entity": "bowl",
                    "attribute": "clean",
                    "change": "less likely"
                },
                {
                    "type": "openpi_entity_gpt3",
                    "entity": "eggs",
                    "attribute": "cracked",
                    "change": "more likely"
                },
                {
                    "type": "openpi_entity_gpt3",
                    "entity": "eggs",
                    "attribute": "whole",
                    "change": "less likely"
                },
                {
                    "type": "openpi_entity_gpt3",
                    "entity": "eggs",
                    "attribute": "cracked",
                    "change": "more likely"
                },
                {
                    "type": "openpi_entity_gpt3",
                    "entity": "eggs",
                    "attribute": "whole",
                    "change": "less likely"
                },
                {
                    "type": "openpi_entity_gpt3",
                    "entity": "eggshells",
                    "attribute": "in the bowl",
                    "change": "more likely"
                },
                {
                    "type": "openpi_entity_gpt3",
                    "entity": "eggshells",
                    "attribute": "in the shell",
                    "change": "less likely"
                },
                {
                    "type": "openpi_entity_gpt3",
                    "entity": "eggs",
                    "attribute": "in the bowl",
                    "change": "more likely"
                },
                {
                    "type": "openpi_entity_gpt3",
                    "entity": "eggs",
                    "attribute": "in the fridge",
                    "change": "less likely"
                }
            ],
            [
                {
                    "type": "step",
                    "step": "Melt\u00a0the butter in a microwave-safe bowl."
                },
                {
                    "type": "entity",
                    "entity": "the butter",
                    "attribute": "liquid",
                    "change": "more likely"
                },
                {
                    "type": "openpi_entity_gpt3",
                    "entity": "bowl",
                    "attribute": "warm",
                    "change": "more likely"
                },
                {
                    "type": "openpi_entity_gpt3",
                    "entity": "bowl",
                    "attribute": "cool",
                    "change": "less likely"
                },
                {
                    "type": "openpi_entity_gpt3",
                    "entity": "eggs",
                    "attribute": "liquid",
                    "change": "more likely"
                },
                {
                    "type": "openpi_entity_gpt3",
                    "entity": "eggs",
                    "attribute": "solid",
                    "change": "less likely"
                },
                {
                    "type": "openpi_entity_gpt3",
                    "entity": "butter",
                    "attribute": "hot",
                    "change": "more likely"
                },
                {
                    "type": "openpi_entity_gpt3",
                    "entity": "butter",
                    "attribute": "cool",
                    "change": "less likely"
                },
                {
                    "type": "openpi_entity_gpt3",
                    "entity": "butter",
                    "attribute": "hot",
                    "change": "more likely"
                },
                {
                    "type": "openpi_entity_gpt3",
                    "entity": "butter",
                    "attribute": "room temperature",
                    "change": "less likely"
                },
                {
                    "type": "openpi_entity_gpt3",
                    "entity": "bowl",
                    "attribute": "warm",
                    "change": "more likely"
                },
                {
                    "type": "openpi_entity_gpt3",
                    "entity": "bowl",
                    "attribute": "room temperature",
                    "change": "less likely"
                },
                {
                    "type": "openpi_entity_gpt3",
                    "entity": "butter",
                    "attribute": "melted",
                    "change": "more likely"
                },
                {
                    "type": "openpi_entity_gpt3",
                    "entity": "butter",
                    "attribute": "solid",
                    "change": "less likely"
                },
                {
                    "type": "openpi_entity_gpt3",
                    "entity": "butter",
                    "attribute": "liquid",
                    "change": "more likely"
                },
                {
                    "type": "openpi_entity_gpt3",
                    "entity": "butter",
                    "attribute": "solid",
                    "change": "less likely"
                }
            ],
            [
                {
                    "type": "step",
                    "step": "Add the butter and milk to the mix."
                },
                {
                    "type": "openpi_entity_gpt3",
                    "entity": "butter",
                    "attribute": "in bowl",
                    "change": "more likely"
                },
                {
                    "type": "openpi_entity_gpt3",
                    "entity": "butter",
                    "attribute": "in fridge",
                    "change": "less likely"
                },
                {
                    "type": "openpi_entity_gpt3",
                    "entity": "butter",
                    "attribute": "in the microwave",
                    "change": "more likely"
                },
                {
                    "type": "openpi_entity_gpt3",
                    "entity": "butter",
                    "attribute": "in the fridge",
                    "change": "less likely"
                },
                {
                    "type": "openpi_entity_gpt3",
                    "entity": "butter",
                    "attribute": "in the bowl",
                    "change": "more likely"
                },
                {
                    "type": "openpi_entity_gpt3",
                    "entity": "butter",
                    "attribute": "in the fridge",
                    "change": "less likely"
                },
                {
                    "type": "openpi_entity_gpt3",
                    "entity": "milk",
                    "attribute": "in the microwave",
                    "change": "more likely"
                },
                {
                    "type": "openpi_entity_gpt3",
                    "entity": "milk",
                    "attribute": "in the fridge",
                    "change": "less likely"
                },
                {
                    "type": "openpi_entity_gpt3",
                    "entity": "milk",
                    "attribute": "in microwave",
                    "change": "more likely"
                },
                {
                    "type": "openpi_entity_gpt3",
                    "entity": "milk",
                    "attribute": "in fridge",
                    "change": "less likely"
                }
            ],
            [
                {
                    "type": "step",
                    "step": "Heat the frying pan to a medium-low flame. "
                },
                {
                    "type": "openpi_entity_gpt3",
                    "entity": "stove",
                    "attribute": "hot",
                    "change": "more likely"
                },
                {
                    "type": "openpi_entity_gpt3",
                    "entity": "stove",
                    "attribute": "cool",
                    "change": "less likely"
                },
                {
                    "type": "openpi_entity_gpt3",
                    "entity": "pan",
                    "attribute": "hot",
                    "change": "more likely"
                },
                {
                    "type": "openpi_entity_gpt3",
                    "entity": "pan",
                    "attribute": "cool",
                    "change": "less likely"
                },
                {
                    "type": "openpi_entity_gpt3",
                    "entity": "frying pan",
                    "attribute": "hot",
                    "change": "more likely"
                },
                {
                    "type": "openpi_entity_gpt3",
                    "entity": "frying pan",
                    "attribute": "cool",
                    "change": "less likely"
                },
                {
                    "type": "openpi_entity_gpt3",
                    "entity": "stove",
                    "attribute": "hot",
                    "change": "more likely"
                },
                {
                    "type": "openpi_entity_gpt3",
                    "entity": "stove",
                    "attribute": "cold",
                    "change": "less likely"
                }
            ],
            [
                {
                    "type": "step",
                    "step": "Pour butter from the tip of a large spoon or from a pitcher onto the hot griddle or greased frying pan."
                },
                {
                    "type": "openpi_entity_gpt3",
                    "entity": "butter",
                    "attribute": "hot",
                    "change": "more likely"
                },
                {
                    "type": "openpi_entity_gpt3",
                    "entity": "butter",
                    "attribute": "cool",
                    "change": "less likely"
                },
                {
                    "type": "openpi_entity_gpt3",
                    "entity": "pan",
                    "attribute": "hot",
                    "change": "more likely"
                },
                {
                    "type": "openpi_entity_gpt3",
                    "entity": "pan",
                    "attribute": "cool",
                    "change": "less likely"
                },
                {
                    "type": "openpi_entity_gpt3",
                    "entity": "pan",
                    "attribute": "heavier",
                    "change": "more likely"
                },
                {
                    "type": "openpi_entity_gpt3",
                    "entity": "pan",
                    "attribute": "lighter",
                    "change": "less likely"
                },
                {
                    "type": "openpi_entity_gpt3",
                    "entity": "butter",
                    "attribute": "on the pan",
                    "change": "more likely"
                },
                {
                    "type": "openpi_entity_gpt3",
                    "entity": "butter",
                    "attribute": "in a container",
                    "change": "less likely"
                },
                {
                    "type": "openpi_entity_gpt3",
                    "entity": "frying pan",
                    "attribute": "hot",
                    "change": "more likely"
                },
                {
                    "type": "openpi_entity_gpt3",
                    "entity": "frying pan",
                    "attribute": "cool",
                    "change": "less likely"
                },
                {
                    "type": "openpi_entity_gpt3",
                    "entity": "butter",
                    "attribute": "on pan",
                    "change": "more likely"
                },
                {
                    "type": "openpi_entity_gpt3",
                    "entity": "butter",
                    "attribute": "in fridge",
                    "change": "less likely"
                }
            ],
            [
                {
                    "type": "step",
                    "step": "Cook for about two minutes or until the pancake is golden."
                },
                {
                    "type": "entity",
                    "entity": "the eggs",
                    "attribute": "liquid",
                    "change": "less likely"
                },
                {
                    "type": "entity",
                    "entity": "the butter",
                    "attribute": "liquid",
                    "change": "less likely"
                },
                {
                    "type": "openpi_entity_gpt3",
                    "entity": "pancake",
                    "attribute": "hot",
                    "change": "more likely"
                },
                {
                    "type": "openpi_entity_gpt3",
                    "entity": "pancake",
                    "attribute": "cool",
                    "change": "less likely"
                },
                {
                    "type": "openpi_entity_gpt3",
                    "entity": "pan",
                    "attribute": "hot",
                    "change": "more likely"
                },
                {
                    "type": "openpi_entity_gpt3",
                    "entity": "pan",
                    "attribute": "cool",
                    "change": "less likely"
                },
                {
                    "type": "openpi_entity_gpt3",
                    "entity": "pancake",
                    "attribute": "golden",
                    "change": "more likely"
                },
                {
                    "type": "openpi_entity_gpt3",
                    "entity": "pancake",
                    "attribute": "white",
                    "change": "less likely"
                },
                {
                    "type": "openpi_entity_gpt3",
                    "entity": "pancake",
                    "attribute": "cooked",
                    "change": "more likely"
                },
                {
                    "type": "openpi_entity_gpt3",
                    "entity": "pancake",
                    "attribute": "raw",
                    "change": "less likely"
                },
                {
                    "type": "openpi_entity_gpt3",
                    "entity": "pancake",
                    "attribute": "hot",
                    "change": "more likely"
                },
                {
                    "type": "openpi_entity_gpt3",
                    "entity": "pancake",
                    "attribute": "cold",
                    "change": "less likely"
                }
            ],
            [
                {
                    "type": "step",
                    "step": "Cook the other side until golden and remove."
                },
                {
                    "type": "openpi_entity_gpt3",
                    "entity": "other side",
                    "attribute": "on a plate",
                    "change": "more likely"
                },
                {
                    "type": "openpi_entity_gpt3",
                    "entity": "other side",
                    "attribute": "in the pan",
                    "change": "less likely"
                },
                {
                    "type": "openpi_entity_gpt3",
                    "entity": "plate",
                    "attribute": "on the table",
                    "change": "more likely"
                },
                {
                    "type": "openpi_entity_gpt3",
                    "entity": "plate",
                    "attribute": "in the cupboard",
                    "change": "less likely"
                },
                {
                    "type": "openpi_entity_gpt3",
                    "entity": "pancake",
                    "attribute": "on plate",
                    "change": "more likely"
                },
                {
                    "type": "openpi_entity_gpt3",
                    "entity": "pancake",
                    "attribute": "in pan",
                    "change": "less likely"
                },
                {
                    "type": "openpi_entity_gpt3",
                    "entity": "pancake",
                    "attribute": "cool",
                    "change": "more likely"
                },
                {
                    "type": "openpi_entity_gpt3",
                    "entity": "pancake",
                    "attribute": "hot",
                    "change": "less likely"
                },
                {
                    "type": "openpi_entity_gpt3",
                    "entity": "pancake",
                    "attribute": "on the plate",
                    "change": "more likely"
                },
                {
                    "type": "openpi_entity_gpt3",
                    "entity": "pancake",
                    "attribute": "in the pan",
                    "change": "less likely"
                },
                {
                    "type": "openpi_entity_gpt3",
                    "entity": "pancake",
                    "attribute": "removed",
                    "change": "more likely"
                },
                {
                    "type": "openpi_entity_gpt3",
                    "entity": "pancake",
                    "attribute": "in pan",
                    "change": "less likely"
                },
                {
                    "type": "openpi_entity_gpt3",
                    "entity": "other side",
                    "attribute": "cooked",
                    "change": "more likely"
                },
                {
                    "type": "openpi_entity_gpt3",
                    "entity": "other side",
                    "attribute": "uncooked",
                    "change": "less likely"
                }
            ]
        ]
    },
    "22": {
        "goal": "How to Unclog a Toilet",
        "annotator": "Pujun Guan",
        "steps": [
            [
                {
                    "step": "Start."
                }
            ],
            [
                {
                    "type": "step",
                    "step": "Insert the plunger into the toilet bowl.\u00a0"
                },
                {
                    "type": "openpi_entity_gpt3",
                    "entity": "plunger",
                    "attribute": "inside of toilet bowl",
                    "change": "more likely"
                },
                {
                    "type": "openpi_entity_gpt3",
                    "entity": "plunger",
                    "attribute": "outside of toilet bowl",
                    "change": "less likely"
                }
            ],
            [
                {
                    "type": "step",
                    "step": "Pump the plunger over the hole.\u00a0"
                },
                {
                    "type": "openpi_entity_gpt3",
                    "entity": "hole",
                    "attribute": "closed",
                    "change": "more likely"
                },
                {
                    "type": "openpi_entity_gpt3",
                    "entity": "hole",
                    "attribute": "open",
                    "change": "less likely"
                },
                {
                    "type": "openpi_entity_gpt3",
                    "entity": "plunger",
                    "attribute": "in the toilet",
                    "change": "more likely"
                },
                {
                    "type": "openpi_entity_gpt3",
                    "entity": "plunger",
                    "attribute": "in the hand",
                    "change": "less likely"
                },
                {
                    "type": "openpi_entity_gpt3",
                    "entity": "plunger",
                    "attribute": "in toilet",
                    "change": "more likely"
                },
                {
                    "type": "openpi_entity_gpt3",
                    "entity": "plunger",
                    "attribute": "outside of toilet",
                    "change": "less likely"
                },
                {
                    "type": "openpi_entity_gpt3",
                    "entity": "plunger",
                    "attribute": "in toilet",
                    "change": "more likely"
                },
                {
                    "type": "openpi_entity_gpt3",
                    "entity": "plunger",
                    "attribute": "in hand",
                    "change": "less likely"
                },
                {
                    "type": "openpi_entity_gpt3",
                    "entity": "plunger",
                    "attribute": "moving",
                    "change": "more likely"
                },
                {
                    "type": "openpi_entity_gpt3",
                    "entity": "plunger",
                    "attribute": "still",
                    "change": "less likely"
                },
                {
                    "type": "openpi_entity_gpt3",
                    "entity": "hand",
                    "attribute": "pumping",
                    "change": "more likely"
                },
                {
                    "type": "openpi_entity_gpt3",
                    "entity": "hand",
                    "attribute": "relaxed",
                    "change": "less likely"
                },
                {
                    "type": "openpi_entity_gpt3",
                    "entity": "plunger",
                    "attribute": "on",
                    "change": "more likely"
                },
                {
                    "type": "openpi_entity_gpt3",
                    "entity": "plunger",
                    "attribute": "off",
                    "change": "less likely"
                }
            ],
            [
                {
                    "type": "step",
                    "step": "Flush the toilet to check the drainage."
                },
                {
                    "type": "entity",
                    "entity": "the pipe",
                    "attribute": "been clogged",
                    "change": "less likely"
                },
                {
                    "type": "multihop",
                    "event": "I use the toilet.",
                    "change": "more likely"
                }
            ]
        ]
    },
    "23": {
        "goal": "How to Make Rice Cakes",
        "annotator": "Pujun Guan",
        "steps": [
            [
                {
                    "step": "Start."
                }
            ],
            [
                {
                    "type": "step",
                    "step": "Wet your fingers and mold cooked sticky rice into circular cake shapes."
                },
                {
                    "type": "openpi_entity_gpt3",
                    "entity": "rice",
                    "attribute": "round",
                    "change": "more likely"
                },
                {
                    "type": "openpi_entity_gpt3",
                    "entity": "rice",
                    "attribute": "flat",
                    "change": "less likely"
                },
                {
                    "type": "openpi_entity_gpt3",
                    "entity": "rice",
                    "attribute": "wet",
                    "change": "more likely"
                },
                {
                    "type": "openpi_entity_gpt3",
                    "entity": "rice",
                    "attribute": "dry",
                    "change": "less likely"
                },
                {
                    "type": "openpi_entity_gpt3",
                    "entity": "rice",
                    "attribute": "soft",
                    "change": "more likely"
                },
                {
                    "type": "openpi_entity_gpt3",
                    "entity": "rice",
                    "attribute": "hard",
                    "change": "less likely"
                }
            ],
            [
                {
                    "type": "step",
                    "step": "Let the shaped cakes dry at room temperature for 1-2 hours."
                },
                {
                    "type": "openpi_entity_gpt3",
                    "entity": "rice cakes",
                    "attribute": "dry",
                    "change": "more likely"
                },
                {
                    "type": "openpi_entity_gpt3",
                    "entity": "rice cakes",
                    "attribute": "wet",
                    "change": "less likely"
                },
                {
                    "type": "openpi_entity_gpt3",
                    "entity": "rice cakes",
                    "attribute": "wet",
                    "change": "more likely"
                },
                {
                    "type": "openpi_entity_gpt3",
                    "entity": "rice cakes",
                    "attribute": "dry",
                    "change": "less likely"
                },
                {
                    "type": "openpi_entity_gpt3",
                    "entity": "rice cakes",
                    "attribute": "cool",
                    "change": "more likely"
                },
                {
                    "type": "openpi_entity_gpt3",
                    "entity": "rice cakes",
                    "attribute": "warm",
                    "change": "less likely"
                },
                {
                    "type": "openpi_entity_gpt3",
                    "entity": "rice cakes",
                    "attribute": "dry",
                    "change": "more likely"
                },
                {
                    "type": "openpi_entity_gpt3",
                    "entity": "rice cakes",
                    "attribute": "wet",
                    "change": "less likely"
                },
                {
                    "type": "openpi_entity_gpt3",
                    "entity": "cakes",
                    "attribute": "cool",
                    "change": "more likely"
                },
                {
                    "type": "openpi_entity_gpt3",
                    "entity": "cakes",
                    "attribute": "warm",
                    "change": "less likely"
                },
                {
                    "type": "openpi_entity_gpt3",
                    "entity": "rice cakes",
                    "attribute": "dry",
                    "change": "more likely"
                },
                {
                    "type": "openpi_entity_gpt3",
                    "entity": "rice cakes",
                    "attribute": "wet",
                    "change": "less likely"
                }
            ],
            [
                {
                    "type": "step",
                    "step": "Pour 44.36 mL (3.000 US tbsp) of olive oil into a skillet."
                },
                {
                    "type": "openpi_entity_gpt3",
                    "entity": "olive oil",
                    "attribute": "in pan",
                    "change": "more likely"
                },
                {
                    "type": "openpi_entity_gpt3",
                    "entity": "olive oil",
                    "attribute": "in bottle",
                    "change": "less likely"
                },
                {
                    "type": "openpi_entity_gpt3",
                    "entity": "skillet",
                    "attribute": "full",
                    "change": "more likely"
                },
                {
                    "type": "openpi_entity_gpt3",
                    "entity": "skillet",
                    "attribute": "empty",
                    "change": "less likely"
                },
                {
                    "type": "openpi_entity_gpt3",
                    "entity": "olive oil",
                    "attribute": "in a skillet",
                    "change": "more likely"
                },
                {
                    "type": "openpi_entity_gpt3",
                    "entity": "olive oil",
                    "attribute": "in a bottle",
                    "change": "less likely"
                },
                {
                    "type": "openpi_entity_gpt3",
                    "entity": "olive oil",
                    "attribute": "in skillet",
                    "change": "more likely"
                },
                {
                    "type": "openpi_entity_gpt3",
                    "entity": "olive oil",
                    "attribute": "in bottle",
                    "change": "less likely"
                },
                {
                    "type": "openpi_entity_gpt3",
                    "entity": "skillet",
                    "attribute": "heavier",
                    "change": "more likely"
                },
                {
                    "type": "openpi_entity_gpt3",
                    "entity": "skillet",
                    "attribute": "lighter",
                    "change": "less likely"
                },
                {
                    "type": "openpi_entity_gpt3",
                    "entity": "olive oil bottle",
                    "attribute": "lighter",
                    "change": "more likely"
                },
                {
                    "type": "openpi_entity_gpt3",
                    "entity": "olive oil bottle",
                    "attribute": "heavier",
                    "change": "less likely"
                },
                {
                    "type": "openpi_entity_gpt3",
                    "entity": "skillet",
                    "attribute": "more full",
                    "change": "more likely"
                },
                {
                    "type": "openpi_entity_gpt3",
                    "entity": "skillet",
                    "attribute": "less full",
                    "change": "less likely"
                },
                {
                    "type": "openpi_entity_gpt3",
                    "entity": "olive oil bottle",
                    "attribute": "on the table",
                    "change": "more likely"
                },
                {
                    "type": "openpi_entity_gpt3",
                    "entity": "olive oil bottle",
                    "attribute": "in the pantry",
                    "change": "less likely"
                }
            ],
            [
                {
                    "type": "step",
                    "step": "Bring the oil to a 204.455 \u00b0C (400.019 \u00b0F) boil."
                },
                {
                    "type": "openpi_entity_gpt3",
                    "entity": "oil",
                    "attribute": "hotter",
                    "change": "more likely"
                },
                {
                    "type": "openpi_entity_gpt3",
                    "entity": "oil",
                    "attribute": "cooler",
                    "change": "less likely"
                },
                {
                    "type": "openpi_entity_gpt3",
                    "entity": "skillet",
                    "attribute": "hot",
                    "change": "more likely"
                },
                {
                    "type": "openpi_entity_gpt3",
                    "entity": "skillet",
                    "attribute": "cool",
                    "change": "less likely"
                }
            ],
            [
                {
                    "type": "step",
                    "step": "Place 1-2 rice cakes in the oil. "
                },
                {
                    "type": "openpi_entity_gpt3",
                    "entity": "rice cakes",
                    "attribute": "in oil",
                    "change": "more likely"
                },
                {
                    "type": "openpi_entity_gpt3",
                    "entity": "rice cakes",
                    "attribute": "in bowl",
                    "change": "less likely"
                },
                {
                    "type": "openpi_entity_gpt3",
                    "entity": "skillet",
                    "attribute": "full",
                    "change": "more likely"
                },
                {
                    "type": "openpi_entity_gpt3",
                    "entity": "skillet",
                    "attribute": "empty",
                    "change": "less likely"
                },
                {
                    "type": "openpi_entity_gpt3",
                    "entity": "rice cakes",
                    "attribute": "hot",
                    "change": "more likely"
                },
                {
                    "type": "openpi_entity_gpt3",
                    "entity": "rice cakes",
                    "attribute": "cool",
                    "change": "less likely"
                },
                {
                    "type": "openpi_entity_gpt3",
                    "entity": "skillet",
                    "attribute": "heavier",
                    "change": "more likely"
                },
                {
                    "type": "openpi_entity_gpt3",
                    "entity": "skillet",
                    "attribute": "lighter",
                    "change": "less likely"
                },
                {
                    "type": "openpi_entity_gpt3",
                    "entity": "rice cakes",
                    "attribute": "in skillet",
                    "change": "more likely"
                },
                {
                    "type": "openpi_entity_gpt3",
                    "entity": "rice cakes",
                    "attribute": "in bowl",
                    "change": "less likely"
                },
                {
                    "type": "openpi_entity_gpt3",
                    "entity": "rice cakes",
                    "attribute": "hot",
                    "change": "more likely"
                },
                {
                    "type": "openpi_entity_gpt3",
                    "entity": "rice cakes",
                    "attribute": "cold",
                    "change": "less likely"
                }
            ],
            [
                {
                    "type": "step",
                    "step": "Remove the rice cakes from the oil when they rise to the surface."
                },
                {
                    "type": "entity",
                    "entity": "the rice cake",
                    "attribute": "hot",
                    "change": "more likely"
                },
                {
                    "type": "entity",
                    "entity": "the rice cake",
                    "attribute": "crispy",
                    "change": "more likely"
                },
                {
                    "type": "entity",
                    "entity": "the rice cake",
                    "attribute": "hard",
                    "change": "more likely"
                },
                {
                    "type": "openpi_entity_gpt3",
                    "entity": "rice cakes",
                    "attribute": "crispy",
                    "change": "more likely"
                },
                {
                    "type": "openpi_entity_gpt3",
                    "entity": "rice cakes",
                    "attribute": "soft",
                    "change": "less likely"
                },
                {
                    "type": "openpi_entity_gpt3",
                    "entity": "rice cakes",
                    "attribute": "cooler",
                    "change": "more likely"
                },
                {
                    "type": "openpi_entity_gpt3",
                    "entity": "rice cakes",
                    "attribute": "hot",
                    "change": "less likely"
                },
                {
                    "type": "openpi_entity_gpt3",
                    "entity": "rice cakes",
                    "attribute": "hotter",
                    "change": "more likely"
                },
                {
                    "type": "openpi_entity_gpt3",
                    "entity": "rice cakes",
                    "attribute": "hot",
                    "change": "less likely"
                },
                {
                    "type": "openpi_entity_gpt3",
                    "entity": "rice cakes",
                    "attribute": "out of oil",
                    "change": "more likely"
                },
                {
                    "type": "openpi_entity_gpt3",
                    "entity": "rice cakes",
                    "attribute": "in oil",
                    "change": "less likely"
                }
            ],
            [
                {
                    "type": "step",
                    "step": "Serve the rice cakes within one day of making them."
                },
                {
                    "type": "entity",
                    "entity": "the rice cake",
                    "attribute": "hot",
                    "change": "less likely"
                },
                {
                    "type": "multihop",
                    "event": "I eat the rice cake safely.",
                    "change": "more likely"
                },
                {
                    "type": "openpi_entity_gpt3",
                    "entity": "serving dish",
                    "attribute": "dirty",
                    "change": "more likely"
                },
                {
                    "type": "openpi_entity_gpt3",
                    "entity": "serving dish",
                    "attribute": "clean",
                    "change": "less likely"
                },
                {
                    "type": "openpi_entity_gpt3",
                    "entity": "rice cakes",
                    "attribute": "on a plate",
                    "change": "more likely"
                },
                {
                    "type": "openpi_entity_gpt3",
                    "entity": "rice cakes",
                    "attribute": "in the pan",
                    "change": "less likely"
                },
                {
                    "type": "openpi_entity_gpt3",
                    "entity": "rice cakes",
                    "attribute": "out of the oil",
                    "change": "more likely"
                },
                {
                    "type": "openpi_entity_gpt3",
                    "entity": "rice cakes",
                    "attribute": "in the oil",
                    "change": "less likely"
                },
                {
                    "type": "openpi_entity_gpt3",
                    "entity": "pan",
                    "attribute": "empty",
                    "change": "more likely"
                },
                {
                    "type": "openpi_entity_gpt3",
                    "entity": "pan",
                    "attribute": "full",
                    "change": "less likely"
                },
                {
                    "type": "openpi_entity_gpt3",
                    "entity": "serving dish",
                    "attribute": "heavier",
                    "change": "more likely"
                },
                {
                    "type": "openpi_entity_gpt3",
                    "entity": "serving dish",
                    "attribute": "lighter",
                    "change": "less likely"
                },
                {
                    "type": "openpi_entity_gpt3",
                    "entity": "rice cakes",
                    "attribute": "in the serving dish",
                    "change": "more likely"
                },
                {
                    "type": "openpi_entity_gpt3",
                    "entity": "rice cakes",
                    "attribute": "in the pan",
                    "change": "less likely"
                }
            ]
        ]
    },
    "24": {
        "goal": "How to Revive a Dying Aloe Vera Plant",
        "annotator": "Pujun Guan",
        "steps": [
            [
                {
                    "step": "Start."
                }
            ],
            [
                {
                    "type": "step",
                    "step": "Examine the leaves."
                },
                {
                    "type": "openpi_entity_gpt3",
                    "entity": "leaves",
                    "attribute": "examined",
                    "change": "more likely"
                },
                {
                    "type": "openpi_entity_gpt3",
                    "entity": "leaves",
                    "attribute": "uninspected",
                    "change": "less likely"
                },
                {
                    "type": "openpi_entity_gpt3",
                    "entity": "leaves",
                    "attribute": "examined",
                    "change": "more likely"
                },
                {
                    "type": "openpi_entity_gpt3",
                    "entity": "leaves",
                    "attribute": "whole",
                    "change": "less likely"
                },
                {
                    "type": "openpi_entity_gpt3",
                    "entity": "person",
                    "attribute": "in the house",
                    "change": "more likely"
                },
                {
                    "type": "openpi_entity_gpt3",
                    "entity": "person",
                    "attribute": "in the garden",
                    "change": "less likely"
                }
            ],
            [
                {
                    "type": "step",
                    "step": "Check the soil moisture."
                },
                {
                    "type": "openpi_entity_gpt3",
                    "entity": "soil",
                    "attribute": "moist",
                    "change": "more likely"
                },
                {
                    "type": "openpi_entity_gpt3",
                    "entity": "soil",
                    "attribute": "dry",
                    "change": "less likely"
                },
                {
                    "type": "openpi_entity_gpt3",
                    "entity": "water",
                    "attribute": "in soil",
                    "change": "more likely"
                },
                {
                    "type": "openpi_entity_gpt3",
                    "entity": "water",
                    "attribute": "in faucet",
                    "change": "less likely"
                },
                {
                    "type": "openpi_entity_gpt3",
                    "entity": "water",
                    "attribute": "in soil",
                    "change": "more likely"
                },
                {
                    "type": "openpi_entity_gpt3",
                    "entity": "water",
                    "attribute": "in hose",
                    "change": "less likely"
                },
                {
                    "type": "openpi_entity_gpt3",
                    "entity": "soil",
                    "attribute": "moist",
                    "change": "more likely"
                },
                {
                    "type": "openpi_entity_gpt3",
                    "entity": "soil",
                    "attribute": "dry",
                    "change": "less likely"
                }
            ],
            [
                {
                    "type": "step",
                    "step": "Water until the soil is just moist."
                },
                {
                    "type": "entity",
                    "entity": "the aloe vera",
                    "attribute": "moist",
                    "change": "more likely"
                },
                {
                    "type": "openpi_entity_gpt3",
                    "entity": "soil",
                    "attribute": "moist",
                    "change": "more likely"
                },
                {
                    "type": "openpi_entity_gpt3",
                    "entity": "soil",
                    "attribute": "dry",
                    "change": "less likely"
                },
                {
                    "type": "openpi_entity_gpt3",
                    "entity": "water",
                    "attribute": "in soil",
                    "change": "more likely"
                },
                {
                    "type": "openpi_entity_gpt3",
                    "entity": "water",
                    "attribute": "in faucet",
                    "change": "less likely"
                },
                {
                    "type": "openpi_entity_gpt3",
                    "entity": "water",
                    "attribute": "in soil",
                    "change": "more likely"
                },
                {
                    "type": "openpi_entity_gpt3",
                    "entity": "water",
                    "attribute": "in hose",
                    "change": "less likely"
                },
                {
                    "type": "openpi_entity_gpt3",
                    "entity": "soil",
                    "attribute": "wet",
                    "change": "more likely"
                },
                {
                    "type": "openpi_entity_gpt3",
                    "entity": "soil",
                    "attribute": "dry",
                    "change": "less likely"
                }
            ],
            [
                {
                    "type": "step",
                    "step": "Water the plant weekly or bi-weekly "
                },
                {
                    "type": "openpi_entity_gpt3",
                    "entity": "water",
                    "attribute": "in soil",
                    "change": "more likely"
                },
                {
                    "type": "openpi_entity_gpt3",
                    "entity": "water",
                    "attribute": "in faucet",
                    "change": "less likely"
                },
                {
                    "type": "openpi_entity_gpt3",
                    "entity": "water",
                    "attribute": "in soil",
                    "change": "more likely"
                },
                {
                    "type": "openpi_entity_gpt3",
                    "entity": "water",
                    "attribute": "in hose",
                    "change": "less likely"
                },
                {
                    "type": "openpi_entity_gpt3",
                    "entity": "soil",
                    "attribute": "moist",
                    "change": "more likely"
                },
                {
                    "type": "openpi_entity_gpt3",
                    "entity": "soil",
                    "attribute": "dry",
                    "change": "less likely"
                },
                {
                    "type": "openpi_entity_gpt3",
                    "entity": "soil",
                    "attribute": "wet",
                    "change": "more likely"
                },
                {
                    "type": "openpi_entity_gpt3",
                    "entity": "soil",
                    "attribute": "dry",
                    "change": "less likely"
                },
                {
                    "type": "openpi_entity_gpt3",
                    "entity": "water",
                    "attribute": "in plant",
                    "change": "more likely"
                },
                {
                    "type": "openpi_entity_gpt3",
                    "entity": "water",
                    "attribute": "in hose",
                    "change": "less likely"
                },
                {
                    "type": "openpi_entity_gpt3",
                    "entity": "soil",
                    "attribute": "wet",
                    "change": "more likely"
                },
                {
                    "type": "openpi_entity_gpt3",
                    "entity": "soil",
                    "attribute": "dry",
                    "change": "less likely"
                }
            ]
        ]
    },
    "25": {
        "goal": "How to Clean White Shoes",
        "annotator": "Pujun Guan",
        "steps": [
            [
                {
                    "step": "Start."
                }
            ],
            [
                {
                    "type": "step",
                    "step": "Mix dish soap into 1\u00a0\u00a0c (240\u00a0ml) of warm water."
                },
                {
                    "type": "openpi_entity_gpt3",
                    "entity": "warm water",
                    "attribute": "in bowl",
                    "change": "more likely"
                },
                {
                    "type": "openpi_entity_gpt3",
                    "entity": "warm water",
                    "attribute": "in faucet",
                    "change": "less likely"
                },
                {
                    "type": "openpi_entity_gpt3",
                    "entity": "dish soap",
                    "attribute": "in water",
                    "change": "more likely"
                },
                {
                    "type": "openpi_entity_gpt3",
                    "entity": "dish soap",
                    "attribute": "in bottle",
                    "change": "less likely"
                },
                {
                    "type": "openpi_entity_gpt3",
                    "entity": "soap",
                    "attribute": "in bowl",
                    "change": "more likely"
                },
                {
                    "type": "openpi_entity_gpt3",
                    "entity": "soap",
                    "attribute": "in bottle",
                    "change": "less likely"
                },
                {
                    "type": "openpi_entity_gpt3",
                    "entity": "water",
                    "attribute": "in bowl",
                    "change": "more likely"
                },
                {
                    "type": "openpi_entity_gpt3",
                    "entity": "water",
                    "attribute": "in faucet",
                    "change": "less likely"
                },
                {
                    "type": "openpi_entity_gpt3",
                    "entity": "bowl",
                    "attribute": "wet",
                    "change": "more likely"
                },
                {
                    "type": "openpi_entity_gpt3",
                    "entity": "bowl",
                    "attribute": "dry",
                    "change": "less likely"
                },
                {
                    "type": "openpi_entity_gpt3",
                    "entity": "dish soap",
                    "attribute": "in bowl",
                    "change": "more likely"
                },
                {
                    "type": "openpi_entity_gpt3",
                    "entity": "dish soap",
                    "attribute": "in bottle",
                    "change": "less likely"
                },
                {
                    "type": "openpi_entity_gpt3",
                    "entity": "water",
                    "attribute": "in bowl",
                    "change": "more likely"
                },
                {
                    "type": "openpi_entity_gpt3",
                    "entity": "water",
                    "attribute": "in pipes",
                    "change": "less likely"
                }
            ],
            [
                {
                    "type": "step",
                    "step": "Clean the soles and rubber pieces with a magic eraser."
                },
                {
                    "type": "entity",
                    "entity": "the shoes",
                    "attribute": "wet",
                    "change": "more likely"
                },
                {
                    "type": "multihop",
                    "event": "I wear the shoes.",
                    "change": "less likely"
                },
                {
                    "type": "openpi_entity_gpt3",
                    "entity": "magic eraser",
                    "attribute": "on the floor",
                    "change": "more likely"
                },
                {
                    "type": "openpi_entity_gpt3",
                    "entity": "magic eraser",
                    "attribute": "in the drawer",
                    "change": "less likely"
                },
                {
                    "type": "openpi_entity_gpt3",
                    "entity": "eraser",
                    "attribute": "on the floor",
                    "change": "more likely"
                },
                {
                    "type": "openpi_entity_gpt3",
                    "entity": "eraser",
                    "attribute": "in the drawer",
                    "change": "less likely"
                },
                {
                    "type": "openpi_entity_gpt3",
                    "entity": "magic eraser",
                    "attribute": "dirty",
                    "change": "more likely"
                },
                {
                    "type": "openpi_entity_gpt3",
                    "entity": "magic eraser",
                    "attribute": "clean",
                    "change": "less likely"
                },
                {
                    "type": "openpi_entity_gpt3",
                    "entity": "soles",
                    "attribute": "clean",
                    "change": "more likely"
                },
                {
                    "type": "openpi_entity_gpt3",
                    "entity": "soles",
                    "attribute": "dirty",
                    "change": "less likely"
                },
                {
                    "type": "openpi_entity_gpt3",
                    "entity": "rubber pieces",
                    "attribute": "clean",
                    "change": "more likely"
                },
                {
                    "type": "openpi_entity_gpt3",
                    "entity": "rubber pieces",
                    "attribute": "dirty",
                    "change": "less likely"
                },
                {
                    "type": "openpi_entity_gpt3",
                    "entity": "eraser",
                    "attribute": "dirty",
                    "change": "more likely"
                },
                {
                    "type": "openpi_entity_gpt3",
                    "entity": "eraser",
                    "attribute": "clean",
                    "change": "less likely"
                },
                {
                    "type": "openpi_entity_gpt3",
                    "entity": "soap",
                    "attribute": "on the floor",
                    "change": "more likely"
                },
                {
                    "type": "openpi_entity_gpt3",
                    "entity": "soap",
                    "attribute": "in the bowl",
                    "change": "less likely"
                },
                {
                    "type": "openpi_entity_gpt3",
                    "entity": "soap",
                    "attribute": "on the soles",
                    "change": "more likely"
                },
                {
                    "type": "openpi_entity_gpt3",
                    "entity": "soap",
                    "attribute": "in the bowl",
                    "change": "less likely"
                }
            ],
            [
                {
                    "type": "step",
                    "step": "Scrub stains with a stiff-bristled toothbrush.\u00a0"
                },
                {
                    "type": "entity",
                    "entity": "the shoes",
                    "attribute": "dirty",
                    "change": "less likely"
                },
                {
                    "type": "openpi_entity_gpt3",
                    "entity": "stains",
                    "attribute": "removed",
                    "change": "more likely"
                },
                {
                    "type": "openpi_entity_gpt3",
                    "entity": "stains",
                    "attribute": "on shoes",
                    "change": "less likely"
                },
                {
                    "type": "openpi_entity_gpt3",
                    "entity": "stains",
                    "attribute": "clean",
                    "change": "more likely"
                },
                {
                    "type": "openpi_entity_gpt3",
                    "entity": "stains",
                    "attribute": "dirty",
                    "change": "less likely"
                },
                {
                    "type": "openpi_entity_gpt3",
                    "entity": "brush",
                    "attribute": "dirty",
                    "change": "more likely"
                },
                {
                    "type": "openpi_entity_gpt3",
                    "entity": "brush",
                    "attribute": "clean",
                    "change": "less likely"
                }
            ],
            [
                {
                    "type": "step",
                    "step": "Pat excess water away with a towel."
                },
                {
                    "type": "openpi_entity_gpt3",
                    "entity": "towel",
                    "attribute": "wet",
                    "change": "more likely"
                },
                {
                    "type": "openpi_entity_gpt3",
                    "entity": "towel",
                    "attribute": "dry",
                    "change": "less likely"
                },
                {
                    "type": "openpi_entity_gpt3",
                    "entity": "excess water",
                    "attribute": "on floor",
                    "change": "more likely"
                },
                {
                    "type": "openpi_entity_gpt3",
                    "entity": "excess water",
                    "attribute": "in sink",
                    "change": "less likely"
                },
                {
                    "type": "openpi_entity_gpt3",
                    "entity": "water",
                    "attribute": "on floor",
                    "change": "more likely"
                },
                {
                    "type": "openpi_entity_gpt3",
                    "entity": "water",
                    "attribute": "in sink",
                    "change": "less likely"
                },
                {
                    "type": "openpi_entity_gpt3",
                    "entity": "floor",
                    "attribute": "dry",
                    "change": "more likely"
                },
                {
                    "type": "openpi_entity_gpt3",
                    "entity": "floor",
                    "attribute": "wet",
                    "change": "less likely"
                }
            ],
            [
                {
                    "type": "step",
                    "step": "Let your shoes air dry. "
                },
                {
                    "type": "entity",
                    "entity": "the shoes",
                    "attribute": "wet",
                    "change": "less likely"
                },
                {
                    "type": "multihop",
                    "event": "I wear the shoes.",
                    "change": "more likely"
                },
                {
                    "type": "openpi_entity_gpt3",
                    "entity": "shoes",
                    "attribute": "dry",
                    "change": "more likely"
                },
                {
                    "type": "openpi_entity_gpt3",
                    "entity": "shoes",
                    "attribute": "wet",
                    "change": "less likely"
                },
                {
                    "type": "openpi_entity_gpt3",
                    "entity": "shoes",
                    "attribute": "on the floor",
                    "change": "more likely"
                },
                {
                    "type": "openpi_entity_gpt3",
                    "entity": "shoes",
                    "attribute": "in the closet",
                    "change": "less likely"
                },
                {
                    "type": "openpi_entity_gpt3",
                    "entity": "shoes",
                    "attribute": "on the floor",
                    "change": "more likely"
                },
                {
                    "type": "openpi_entity_gpt3",
                    "entity": "shoes",
                    "attribute": "in closet",
                    "change": "less likely"
                }
            ]
        ]
    },
    "26": {
        "goal": "How to Fold a Towel Swan",
        "annotator": "Pujun Guan",
        "steps": [
            [
                {
                    "step": "Start."
                }
            ],
            [
                {
                    "type": "step",
                    "step": "Lay a bath towel flat."
                },
                {
                    "type": "openpi_entity_gpt3",
                    "entity": "towel",
                    "attribute": "flat",
                    "change": "more likely"
                },
                {
                    "type": "openpi_entity_gpt3",
                    "entity": "towel",
                    "attribute": "folded",
                    "change": "less likely"
                },
                {
                    "type": "openpi_entity_gpt3",
                    "entity": "towel",
                    "attribute": "on the counter",
                    "change": "more likely"
                },
                {
                    "type": "openpi_entity_gpt3",
                    "entity": "towel",
                    "attribute": "in drawer",
                    "change": "less likely"
                },
                {
                    "type": "openpi_entity_gpt3",
                    "entity": "towel",
                    "attribute": "on the counter",
                    "change": "more likely"
                },
                {
                    "type": "openpi_entity_gpt3",
                    "entity": "towel",
                    "attribute": "in the drawer",
                    "change": "less likely"
                },
                {
                    "type": "openpi_entity_gpt3",
                    "entity": "towel",
                    "attribute": "flat",
                    "change": "more likely"
                },
                {
                    "type": "openpi_entity_gpt3",
                    "entity": "towel",
                    "attribute": "folded",
                    "change": "less likely"
                },
                {
                    "type": "openpi_entity_gpt3",
                    "entity": "counter",
                    "attribute": "covered with towel",
                    "change": "more likely"
                },
                {
                    "type": "openpi_entity_gpt3",
                    "entity": "counter",
                    "attribute": "bare",
                    "change": "less likely"
                }
            ],
            [
                {
                    "type": "step",
                    "step": "Fold the top two corners downwards and inwards so that they meet in the center."
                },
                {
                    "type": "openpi_entity_gpt3",
                    "entity": "towel",
                    "attribute": "folded",
                    "change": "more likely"
                },
                {
                    "type": "openpi_entity_gpt3",
                    "entity": "towel",
                    "attribute": "flat",
                    "change": "less likely"
                }
            ],
            [
                {
                    "type": "step",
                    "step": "Roll the two outside edges inwards toward the center."
                },
                {
                    "type": "openpi_entity_gpt3",
                    "entity": "towel",
                    "attribute": "rolled",
                    "change": "more likely"
                },
                {
                    "type": "openpi_entity_gpt3",
                    "entity": "towel",
                    "attribute": "flat",
                    "change": "less likely"
                },
                {
                    "type": "openpi_entity_gpt3",
                    "entity": "edges",
                    "attribute": "folded in",
                    "change": "more likely"
                },
                {
                    "type": "openpi_entity_gpt3",
                    "entity": "edges",
                    "attribute": "straight",
                    "change": "less likely"
                }
            ],
            [
                {
                    "type": "step",
                    "step": "Fold the resulting arrow in to a Z."
                },
                {
                    "type": "entity",
                    "entity": "the towel",
                    "attribute": "like a swan",
                    "change": "more likely"
                },
                {
                    "type": "multihop",
                    "event": "I see the towel swan.",
                    "change": "more likely"
                },
                {
                    "type": "openpi_entity_gpt3",
                    "entity": "towel",
                    "attribute": "in the hand",
                    "change": "more likely"
                },
                {
                    "type": "openpi_entity_gpt3",
                    "entity": "towel",
                    "attribute": "on the table",
                    "change": "less likely"
                },
                {
                    "type": "openpi_entity_gpt3",
                    "entity": "towel",
                    "attribute": "rolled up",
                    "change": "more likely"
                },
                {
                    "type": "openpi_entity_gpt3",
                    "entity": "towel",
                    "attribute": "flat",
                    "change": "less likely"
                },
                {
                    "type": "openpi_entity_gpt3",
                    "entity": "towel",
                    "attribute": "rolled",
                    "change": "more likely"
                },
                {
                    "type": "openpi_entity_gpt3",
                    "entity": "towel",
                    "attribute": "flat",
                    "change": "less likely"
                }
            ],
            [
                {
                    "type": "step",
                    "step": "Set the Z down and squeeze the corners to set the curves. "
                },
                {
                    "type": "openpi_entity_gpt3",
                    "entity": "towel",
                    "attribute": "on the floor",
                    "change": "more likely"
                },
                {
                    "type": "openpi_entity_gpt3",
                    "entity": "towel",
                    "attribute": "on the table",
                    "change": "less likely"
                },
                {
                    "type": "openpi_entity_gpt3",
                    "entity": "towel",
                    "attribute": "curved",
                    "change": "more likely"
                },
                {
                    "type": "openpi_entity_gpt3",
                    "entity": "towel",
                    "attribute": "flat",
                    "change": "less likely"
                },
                {
                    "type": "openpi_entity_gpt3",
                    "entity": "towel",
                    "attribute": "curved",
                    "change": "more likely"
                },
                {
                    "type": "openpi_entity_gpt3",
                    "entity": "towel",
                    "attribute": "straight",
                    "change": "less likely"
                }
            ]
        ]
    },
    "27": {
        "goal": "How to Make a Vodka Watermelon",
        "annotator": "Pujun Guan",
        "steps": [
            [
                {
                    "step": "Start."
                }
            ],
            [
                {
                    "type": "step",
                    "step": "Trace a circle onto the watermelon rind using your vodka bottle\u2019s cap."
                },
                {
                    "type": "openpi_entity_gpt3",
                    "entity": "vodka bottle",
                    "attribute": "wet",
                    "change": "more likely"
                },
                {
                    "type": "openpi_entity_gpt3",
                    "entity": "vodka bottle",
                    "attribute": "dry",
                    "change": "less likely"
                },
                {
                    "type": "openpi_entity_gpt3",
                    "entity": "vodka bottle cap",
                    "attribute": "wet",
                    "change": "more likely"
                },
                {
                    "type": "openpi_entity_gpt3",
                    "entity": "vodka bottle cap",
                    "attribute": "dry",
                    "change": "less likely"
                },
                {
                    "type": "openpi_entity_gpt3",
                    "entity": "rind",
                    "attribute": "wet",
                    "change": "more likely"
                },
                {
                    "type": "openpi_entity_gpt3",
                    "entity": "rind",
                    "attribute": "dry",
                    "change": "less likely"
                },
                {
                    "type": "openpi_entity_gpt3",
                    "entity": "vodka bottle cap",
                    "attribute": "off the bottle",
                    "change": "more likely"
                },
                {
                    "type": "openpi_entity_gpt3",
                    "entity": "vodka bottle cap",
                    "attribute": "on the bottle",
                    "change": "less likely"
                },
                {
                    "type": "openpi_entity_gpt3",
                    "entity": "vodka bottle cap",
                    "attribute": "off the bottle cap",
                    "change": "more likely"
                },
                {
                    "type": "openpi_entity_gpt3",
                    "entity": "vodka bottle cap",
                    "attribute": "on the bottle cap",
                    "change": "less likely"
                },
                {
                    "type": "openpi_entity_gpt3",
                    "entity": "vodka bottle's cap",
                    "attribute": "off the bottle",
                    "change": "more likely"
                },
                {
                    "type": "openpi_entity_gpt3",
                    "entity": "vodka bottle's cap",
                    "attribute": "on the bottle",
                    "change": "less likely"
                },
                {
                    "type": "openpi_entity_gpt3",
                    "entity": "watermelon",
                    "attribute": "wet",
                    "change": "more likely"
                },
                {
                    "type": "openpi_entity_gpt3",
                    "entity": "watermelon",
                    "attribute": "dry",
                    "change": "less likely"
                }
            ],
            [
                {
                    "type": "step",
                    "step": "Cut out the circle to create a hole in the watermelon."
                },
                {
                    "type": "entity",
                    "entity": "the watermelon",
                    "attribute": "in whole",
                    "change": "less likely"
                },
                {
                    "type": "openpi_entity_gpt3",
                    "entity": "vodka bottle cap",
                    "attribute": "off the vodka bottle",
                    "change": "more likely"
                },
                {
                    "type": "openpi_entity_gpt3",
                    "entity": "vodka bottle cap",
                    "attribute": "on the vodka bottle",
                    "change": "less likely"
                },
                {
                    "type": "openpi_entity_gpt3",
                    "entity": "watermelon",
                    "attribute": "dirty",
                    "change": "more likely"
                },
                {
                    "type": "openpi_entity_gpt3",
                    "entity": "watermelon",
                    "attribute": "clean",
                    "change": "less likely"
                },
                {
                    "type": "openpi_entity_gpt3",
                    "entity": "cutting board",
                    "attribute": "dirty",
                    "change": "more likely"
                },
                {
                    "type": "openpi_entity_gpt3",
                    "entity": "cutting board",
                    "attribute": "clean",
                    "change": "less likely"
                },
                {
                    "type": "openpi_entity_gpt3",
                    "entity": "knife",
                    "attribute": "dirty",
                    "change": "more likely"
                },
                {
                    "type": "openpi_entity_gpt3",
                    "entity": "knife",
                    "attribute": "clean",
                    "change": "less likely"
                },
                {
                    "type": "openpi_entity_gpt3",
                    "entity": "watermelon",
                    "attribute": "cut",
                    "change": "more likely"
                },
                {
                    "type": "openpi_entity_gpt3",
                    "entity": "watermelon",
                    "attribute": "whole",
                    "change": "less likely"
                },
                {
                    "type": "openpi_entity_gpt3",
                    "entity": "vodka bottle cap",
                    "attribute": "dirty",
                    "change": "more likely"
                },
                {
                    "type": "openpi_entity_gpt3",
                    "entity": "vodka bottle cap",
                    "attribute": "clean",
                    "change": "less likely"
                },
                {
                    "type": "openpi_entity_gpt3",
                    "entity": "watermelon",
                    "attribute": "cut",
                    "change": "more likely"
                },
                {
                    "type": "openpi_entity_gpt3",
                    "entity": "watermelon",
                    "attribute": "whole",
                    "change": "less likely"
                },
                {
                    "type": "openpi_entity_gpt3",
                    "entity": "knife",
                    "attribute": "on the counter",
                    "change": "more likely"
                },
                {
                    "type": "openpi_entity_gpt3",
                    "entity": "knife",
                    "attribute": "in the drawer",
                    "change": "less likely"
                }
            ],
            [
                {
                    "type": "step",
                    "step": "Poke holes into the pink watermelon flesh using a skewer."
                },
                {
                    "type": "multihop",
                    "event": "I pour lots of liquid through the hole of the watermelon.",
                    "change": "more likely"
                },
                {
                    "type": "openpi_entity_gpt3",
                    "entity": "skewer",
                    "attribute": "on watermelon",
                    "change": "more likely"
                },
                {
                    "type": "openpi_entity_gpt3",
                    "entity": "skewer",
                    "attribute": "in drawer",
                    "change": "less likely"
                },
                {
                    "type": "openpi_entity_gpt3",
                    "entity": "watermelon",
                    "attribute": "pierced",
                    "change": "more likely"
                },
                {
                    "type": "openpi_entity_gpt3",
                    "entity": "watermelon",
                    "attribute": "whole",
                    "change": "less likely"
                },
                {
                    "type": "openpi_entity_gpt3",
                    "entity": "skewer",
                    "attribute": "pierced",
                    "change": "more likely"
                },
                {
                    "type": "openpi_entity_gpt3",
                    "entity": "skewer",
                    "attribute": "whole",
                    "change": "less likely"
                },
                {
                    "type": "openpi_entity_gpt3",
                    "entity": "skewer",
                    "attribute": "on the watermelon",
                    "change": "more likely"
                },
                {
                    "type": "openpi_entity_gpt3",
                    "entity": "skewer",
                    "attribute": "in the drawer",
                    "change": "less likely"
                }
            ],
            [
                {
                    "type": "step",
                    "step": "Pour vodka into the watermelon through a funnel."
                },
                {
                    "type": "openpi_entity_gpt3",
                    "entity": "vodka bottle",
                    "attribute": "wet",
                    "change": "more likely"
                },
                {
                    "type": "openpi_entity_gpt3",
                    "entity": "vodka bottle",
                    "attribute": "dry",
                    "change": "less likely"
                },
                {
                    "type": "openpi_entity_gpt3",
                    "entity": "watermelon",
                    "attribute": "full",
                    "change": "more likely"
                },
                {
                    "type": "openpi_entity_gpt3",
                    "entity": "watermelon",
                    "attribute": "empty",
                    "change": "less likely"
                },
                {
                    "type": "openpi_entity_gpt3",
                    "entity": "watermelon",
                    "attribute": "heavier",
                    "change": "more likely"
                },
                {
                    "type": "openpi_entity_gpt3",
                    "entity": "watermelon",
                    "attribute": "lighter",
                    "change": "less likely"
                },
                {
                    "type": "openpi_entity_gpt3",
                    "entity": "vodka",
                    "attribute": "in watermelon",
                    "change": "more likely"
                },
                {
                    "type": "openpi_entity_gpt3",
                    "entity": "vodka",
                    "attribute": "in bottle",
                    "change": "less likely"
                },
                {
                    "type": "openpi_entity_gpt3",
                    "entity": "bottle",
                    "attribute": "empty",
                    "change": "more likely"
                },
                {
                    "type": "openpi_entity_gpt3",
                    "entity": "bottle",
                    "attribute": "full",
                    "change": "less likely"
                }
            ],
            [
                {
                    "type": "step",
                    "step": "Wait until the vodka seeps into the watermelon before refilling the funnel."
                },
                {
                    "type": "openpi_entity_gpt3",
                    "entity": "vodka",
                    "attribute": "in watermelon",
                    "change": "more likely"
                },
                {
                    "type": "openpi_entity_gpt3",
                    "entity": "vodka",
                    "attribute": "in bottle",
                    "change": "less likely"
                },
                {
                    "type": "openpi_entity_gpt3",
                    "entity": "watermelon",
                    "attribute": "full",
                    "change": "more likely"
                },
                {
                    "type": "openpi_entity_gpt3",
                    "entity": "watermelon",
                    "attribute": "empty",
                    "change": "less likely"
                },
                {
                    "type": "openpi_entity_gpt3",
                    "entity": "funnel",
                    "attribute": "wet",
                    "change": "more likely"
                },
                {
                    "type": "openpi_entity_gpt3",
                    "entity": "funnel",
                    "attribute": "dry",
                    "change": "less likely"
                },
                {
                    "type": "openpi_entity_gpt3",
                    "entity": "watermelon",
                    "attribute": "wet",
                    "change": "more likely"
                },
                {
                    "type": "openpi_entity_gpt3",
                    "entity": "watermelon",
                    "attribute": "dry",
                    "change": "less likely"
                }
            ],
            [
                {
                    "type": "step",
                    "step": "Refrigerate your vodka watermelon overnight before the party."
                },
                {
                    "type": "openpi_entity_gpt3",
                    "entity": "watermelon",
                    "attribute": "cold",
                    "change": "more likely"
                },
                {
                    "type": "openpi_entity_gpt3",
                    "entity": "watermelon",
                    "attribute": "room temperature",
                    "change": "less likely"
                },
                {
                    "type": "openpi_entity_gpt3",
                    "entity": "vodka",
                    "attribute": "in refrigerator",
                    "change": "more likely"
                },
                {
                    "type": "openpi_entity_gpt3",
                    "entity": "vodka",
                    "attribute": "in watermelon",
                    "change": "less likely"
                },
                {
                    "type": "openpi_entity_gpt3",
                    "entity": "watermelon",
                    "attribute": "cold",
                    "change": "more likely"
                },
                {
                    "type": "openpi_entity_gpt3",
                    "entity": "watermelon",
                    "attribute": "warm",
                    "change": "less likely"
                }
            ],
            [
                {
                    "type": "step",
                    "step": "Serve the vodka watermelon drink immediately after removing it from the fridge. "
                },
                {
                    "type": "openpi_entity_gpt3",
                    "entity": "vodka",
                    "attribute": "warm",
                    "change": "more likely"
                },
                {
                    "type": "openpi_entity_gpt3",
                    "entity": "vodka",
                    "attribute": "cold",
                    "change": "less likely"
                },
                {
                    "type": "openpi_entity_gpt3",
                    "entity": "watermelon",
                    "attribute": "warm",
                    "change": "more likely"
                },
                {
                    "type": "openpi_entity_gpt3",
                    "entity": "watermelon",
                    "attribute": "cold",
                    "change": "less likely"
                },
                {
                    "type": "openpi_entity_gpt3",
                    "entity": "vodka",
                    "attribute": "in glass",
                    "change": "more likely"
                },
                {
                    "type": "openpi_entity_gpt3",
                    "entity": "vodka",
                    "attribute": "in watermelon",
                    "change": "less likely"
                },
                {
                    "type": "openpi_entity_gpt3",
                    "entity": "vodka watermelon drink",
                    "attribute": "on table",
                    "change": "more likely"
                },
                {
                    "type": "openpi_entity_gpt3",
                    "entity": "vodka watermelon drink",
                    "attribute": "in fridge",
                    "change": "less likely"
                }
            ]
        ]
    },
    "28": {
        "goal": "How to Make Egg White Omelet",
        "annotator": "Pujun Guan",
        "steps": [
            [
                {
                    "step": "Start."
                }
            ],
            [
                {
                    "type": "step",
                    "step": "Heat 2 teaspoons (9.9 ml) of olive oil in a skillet over medium-high heat."
                },
                {
                    "type": "openpi_entity_gpt3",
                    "entity": "olive oil",
                    "attribute": "hot",
                    "change": "more likely"
                },
                {
                    "type": "openpi_entity_gpt3",
                    "entity": "olive oil",
                    "attribute": "room temperature",
                    "change": "less likely"
                },
                {
                    "type": "openpi_entity_gpt3",
                    "entity": "olive oil",
                    "attribute": "in skillet",
                    "change": "more likely"
                },
                {
                    "type": "openpi_entity_gpt3",
                    "entity": "olive oil",
                    "attribute": "in bottle",
                    "change": "less likely"
                },
                {
                    "type": "openpi_entity_gpt3",
                    "entity": "skillet",
                    "attribute": "hot",
                    "change": "more likely"
                },
                {
                    "type": "openpi_entity_gpt3",
                    "entity": "skillet",
                    "attribute": "cool",
                    "change": "less likely"
                }
            ],
            [
                {
                    "type": "step",
                    "step": "Saut\u00e9 onions with peppers for 3 minutes if you'd like veggies in the omelet."
                },
                {
                    "type": "openpi_entity_gpt3",
                    "entity": "onions",
                    "attribute": "saut\u00e9ed",
                    "change": "more likely"
                },
                {
                    "type": "openpi_entity_gpt3",
                    "entity": "onions",
                    "attribute": "raw",
                    "change": "less likely"
                },
                {
                    "type": "openpi_entity_gpt3",
                    "entity": "skillet",
                    "attribute": "hot",
                    "change": "more likely"
                },
                {
                    "type": "openpi_entity_gpt3",
                    "entity": "skillet",
                    "attribute": "cool",
                    "change": "less likely"
                },
                {
                    "type": "openpi_entity_gpt3",
                    "entity": "peppers",
                    "attribute": "saut\u00e9ed",
                    "change": "more likely"
                },
                {
                    "type": "openpi_entity_gpt3",
                    "entity": "peppers",
                    "attribute": "raw",
                    "change": "less likely"
                },
                {
                    "type": "openpi_entity_gpt3",
                    "entity": "onions",
                    "attribute": "hot",
                    "change": "more likely"
                },
                {
                    "type": "openpi_entity_gpt3",
                    "entity": "onions",
                    "attribute": "cool",
                    "change": "less likely"
                },
                {
                    "type": "openpi_entity_gpt3",
                    "entity": "peppers",
                    "attribute": "in the pan",
                    "change": "more likely"
                },
                {
                    "type": "openpi_entity_gpt3",
                    "entity": "peppers",
                    "attribute": "in a container",
                    "change": "less likely"
                },
                {
                    "type": "openpi_entity_gpt3",
                    "entity": "peppers",
                    "attribute": "hot",
                    "change": "more likely"
                },
                {
                    "type": "openpi_entity_gpt3",
                    "entity": "peppers",
                    "attribute": "cool",
                    "change": "less likely"
                },
                {
                    "type": "openpi_entity_gpt3",
                    "entity": "onions",
                    "attribute": "in the skillet",
                    "change": "more likely"
                },
                {
                    "type": "openpi_entity_gpt3",
                    "entity": "onions",
                    "attribute": "in a container",
                    "change": "less likely"
                }
            ],
            [
                {
                    "type": "step",
                    "step": "Heat chopped tomato and ham for 2 minutes for a more filling omelet."
                },
                {
                    "type": "openpi_entity_gpt3",
                    "entity": "ingredients",
                    "attribute": "hotter",
                    "change": "more likely"
                },
                {
                    "type": "openpi_entity_gpt3",
                    "entity": "ingredients",
                    "attribute": "cooler",
                    "change": "less likely"
                },
                {
                    "type": "openpi_entity_gpt3",
                    "entity": "ham",
                    "attribute": "hot",
                    "change": "more likely"
                },
                {
                    "type": "openpi_entity_gpt3",
                    "entity": "ham",
                    "attribute": "cold",
                    "change": "less likely"
                },
                {
                    "type": "openpi_entity_gpt3",
                    "entity": "tomato",
                    "attribute": "in the pan",
                    "change": "more likely"
                },
                {
                    "type": "openpi_entity_gpt3",
                    "entity": "tomato",
                    "attribute": "in a package",
                    "change": "less likely"
                },
                {
                    "type": "openpi_entity_gpt3",
                    "entity": "tomato",
                    "attribute": "in the pan",
                    "change": "more likely"
                },
                {
                    "type": "openpi_entity_gpt3",
                    "entity": "tomato",
                    "attribute": "in a container",
                    "change": "less likely"
                },
                {
                    "type": "openpi_entity_gpt3",
                    "entity": "tomato",
                    "attribute": "in skillet",
                    "change": "more likely"
                },
                {
                    "type": "openpi_entity_gpt3",
                    "entity": "tomato",
                    "attribute": "in fridge",
                    "change": "less likely"
                },
                {
                    "type": "openpi_entity_gpt3",
                    "entity": "tomato and ham",
                    "attribute": "mixed",
                    "change": "more likely"
                },
                {
                    "type": "openpi_entity_gpt3",
                    "entity": "tomato and ham",
                    "attribute": "separate",
                    "change": "less likely"
                },
                {
                    "type": "openpi_entity_gpt3",
                    "entity": "ham",
                    "attribute": "in the pan",
                    "change": "more likely"
                },
                {
                    "type": "openpi_entity_gpt3",
                    "entity": "ham",
                    "attribute": "in a package",
                    "change": "less likely"
                },
                {
                    "type": "openpi_entity_gpt3",
                    "entity": "skillet",
                    "attribute": "hot",
                    "change": "more likely"
                },
                {
                    "type": "openpi_entity_gpt3",
                    "entity": "skillet",
                    "attribute": "cool",
                    "change": "less likely"
                },
                {
                    "type": "openpi_entity_gpt3",
                    "entity": "tomato",
                    "attribute": "hot",
                    "change": "more likely"
                },
                {
                    "type": "openpi_entity_gpt3",
                    "entity": "tomato",
                    "attribute": "cool",
                    "change": "less likely"
                },
                {
                    "type": "openpi_entity_gpt3",
                    "entity": "tomato",
                    "attribute": "chopped",
                    "change": "more likely"
                },
                {
                    "type": "openpi_entity_gpt3",
                    "entity": "tomato",
                    "attribute": "whole",
                    "change": "less likely"
                },
                {
                    "type": "openpi_entity_gpt3",
                    "entity": "ham",
                    "attribute": "in the skillet",
                    "change": "more likely"
                },
                {
                    "type": "openpi_entity_gpt3",
                    "entity": "ham",
                    "attribute": "in the fridge",
                    "change": "less likely"
                },
                {
                    "type": "openpi_entity_gpt3",
                    "entity": "ham",
                    "attribute": "in the pan",
                    "change": "more likely"
                },
                {
                    "type": "openpi_entity_gpt3",
                    "entity": "ham",
                    "attribute": "in the fridge",
                    "change": "less likely"
                },
                {
                    "type": "openpi_entity_gpt3",
                    "entity": "ham",
                    "attribute": "hot",
                    "change": "more likely"
                },
                {
                    "type": "openpi_entity_gpt3",
                    "entity": "ham",
                    "attribute": "cool",
                    "change": "less likely"
                },
                {
                    "type": "openpi_entity_gpt3",
                    "entity": "ingredients",
                    "attribute": "hot",
                    "change": "more likely"
                },
                {
                    "type": "openpi_entity_gpt3",
                    "entity": "ingredients",
                    "attribute": "cool",
                    "change": "less likely"
                }
            ],
            [
                {
                    "type": "step",
                    "step": "Transfer the optional mixture to a bowl and turn the burner down to medium."
                },
                {
                    "type": "openpi_entity_gpt3",
                    "entity": "bowl",
                    "attribute": "hot",
                    "change": "more likely"
                },
                {
                    "type": "openpi_entity_gpt3",
                    "entity": "bowl",
                    "attribute": "cool",
                    "change": "less likely"
                },
                {
                    "type": "openpi_entity_gpt3",
                    "entity": "mixture",
                    "attribute": "cool",
                    "change": "more likely"
                },
                {
                    "type": "openpi_entity_gpt3",
                    "entity": "mixture",
                    "attribute": "hot",
                    "change": "less likely"
                },
                {
                    "type": "openpi_entity_gpt3",
                    "entity": "skillet",
                    "attribute": "warm",
                    "change": "more likely"
                },
                {
                    "type": "openpi_entity_gpt3",
                    "entity": "skillet",
                    "attribute": "hot",
                    "change": "less likely"
                },
                {
                    "type": "openpi_entity_gpt3",
                    "entity": "mixture",
                    "attribute": "in bowl",
                    "change": "more likely"
                },
                {
                    "type": "openpi_entity_gpt3",
                    "entity": "mixture",
                    "attribute": "in skillet",
                    "change": "less likely"
                },
                {
                    "type": "openpi_entity_gpt3",
                    "entity": "burner",
                    "attribute": "on medium",
                    "change": "more likely"
                },
                {
                    "type": "openpi_entity_gpt3",
                    "entity": "burner",
                    "attribute": "on high",
                    "change": "less likely"
                },
                {
                    "type": "openpi_entity_gpt3",
                    "entity": "skillet",
                    "attribute": "cool",
                    "change": "more likely"
                },
                {
                    "type": "openpi_entity_gpt3",
                    "entity": "skillet",
                    "attribute": "hot",
                    "change": "less likely"
                }
            ],
            [
                {
                    "type": "step",
                    "step": "Whisk 3 egg whites in a separate bowl and pour them into the skillet. "
                },
                {
                    "type": "openpi_entity_gpt3",
                    "entity": "egg whites",
                    "attribute": "in the skillet",
                    "change": "more likely"
                },
                {
                    "type": "openpi_entity_gpt3",
                    "entity": "egg whites",
                    "attribute": "in a bowl",
                    "change": "less likely"
                },
                {
                    "type": "openpi_entity_gpt3",
                    "entity": "egg yolks",
                    "attribute": "in the skillet",
                    "change": "more likely"
                },
                {
                    "type": "openpi_entity_gpt3",
                    "entity": "egg yolks",
                    "attribute": "in a bowl",
                    "change": "less likely"
                },
                {
                    "type": "openpi_entity_gpt3",
                    "entity": "egg yolks",
                    "attribute": "whisked",
                    "change": "more likely"
                },
                {
                    "type": "openpi_entity_gpt3",
                    "entity": "egg yolks",
                    "attribute": "unmixed",
                    "change": "less likely"
                },
                {
                    "type": "openpi_entity_gpt3",
                    "entity": "egg whites",
                    "attribute": "whisked",
                    "change": "more likely"
                },
                {
                    "type": "openpi_entity_gpt3",
                    "entity": "egg whites",
                    "attribute": "unmixed",
                    "change": "less likely"
                },
                {
                    "type": "openpi_entity_gpt3",
                    "entity": "egg whites",
                    "attribute": "mixed",
                    "change": "more likely"
                },
                {
                    "type": "openpi_entity_gpt3",
                    "entity": "egg whites",
                    "attribute": "unmixed",
                    "change": "less likely"
                },
                {
                    "type": "openpi_entity_gpt3",
                    "entity": "mixture",
                    "attribute": "in skillet",
                    "change": "more likely"
                },
                {
                    "type": "openpi_entity_gpt3",
                    "entity": "mixture",
                    "attribute": "in bowl",
                    "change": "less likely"
                },
                {
                    "type": "openpi_entity_gpt3",
                    "entity": "mixture",
                    "attribute": "in the skillet",
                    "change": "more likely"
                },
                {
                    "type": "openpi_entity_gpt3",
                    "entity": "mixture",
                    "attribute": "in a bowl",
                    "change": "less likely"
                },
                {
                    "type": "openpi_entity_gpt3",
                    "entity": "egg yolks",
                    "attribute": "beaten",
                    "change": "more likely"
                },
                {
                    "type": "openpi_entity_gpt3",
                    "entity": "egg yolks",
                    "attribute": "intact",
                    "change": "less likely"
                },
                {
                    "type": "openpi_entity_gpt3",
                    "entity": "egg whites",
                    "attribute": "in a bowl",
                    "change": "more likely"
                },
                {
                    "type": "openpi_entity_gpt3",
                    "entity": "egg whites",
                    "attribute": "in a container",
                    "change": "less likely"
                },
                {
                    "type": "openpi_entity_gpt3",
                    "entity": "whisk",
                    "attribute": "dirty",
                    "change": "more likely"
                },
                {
                    "type": "openpi_entity_gpt3",
                    "entity": "whisk",
                    "attribute": "clean",
                    "change": "less likely"
                },
                {
                    "type": "openpi_entity_gpt3",
                    "entity": "egg whites",
                    "attribute": "whisked",
                    "change": "more likely"
                },
                {
                    "type": "openpi_entity_gpt3",
                    "entity": "egg whites",
                    "attribute": "separate",
                    "change": "less likely"
                }
            ],
            [
                {
                    "type": "step",
                    "step": "Cook the whites for 2 to 3 minutes or until they're set and no longer runny."
                },
                {
                    "type": "entity",
                    "entity": "the eggs",
                    "attribute": "liquid",
                    "change": "less likely"
                },
                {
                    "type": "openpi_entity_gpt3",
                    "entity": "whites",
                    "attribute": "cooked",
                    "change": "more likely"
                },
                {
                    "type": "openpi_entity_gpt3",
                    "entity": "whites",
                    "attribute": "raw",
                    "change": "less likely"
                },
                {
                    "type": "openpi_entity_gpt3",
                    "entity": "mixture",
                    "attribute": "hotter",
                    "change": "more likely"
                },
                {
                    "type": "openpi_entity_gpt3",
                    "entity": "mixture",
                    "attribute": "cooler",
                    "change": "less likely"
                },
                {
                    "type": "openpi_entity_gpt3",
                    "entity": "egg whites",
                    "attribute": "hot",
                    "change": "more likely"
                },
                {
                    "type": "openpi_entity_gpt3",
                    "entity": "egg whites",
                    "attribute": "cool",
                    "change": "less likely"
                },
                {
                    "type": "openpi_entity_gpt3",
                    "entity": "skillet",
                    "attribute": "hot",
                    "change": "more likely"
                },
                {
                    "type": "openpi_entity_gpt3",
                    "entity": "skillet",
                    "attribute": "cool",
                    "change": "less likely"
                },
                {
                    "type": "openpi_entity_gpt3",
                    "entity": "whites",
                    "attribute": "hot",
                    "change": "more likely"
                },
                {
                    "type": "openpi_entity_gpt3",
                    "entity": "whites",
                    "attribute": "cool",
                    "change": "less likely"
                },
                {
                    "type": "openpi_entity_gpt3",
                    "entity": "eggs",
                    "attribute": "hot",
                    "change": "more likely"
                },
                {
                    "type": "openpi_entity_gpt3",
                    "entity": "eggs",
                    "attribute": "cold",
                    "change": "less likely"
                },
                {
                    "type": "openpi_entity_gpt3",
                    "entity": "mixture",
                    "attribute": "cooked",
                    "change": "more likely"
                },
                {
                    "type": "openpi_entity_gpt3",
                    "entity": "mixture",
                    "attribute": "raw",
                    "change": "less likely"
                },
                {
                    "type": "openpi_entity_gpt3",
                    "entity": "eggs",
                    "attribute": "hot",
                    "change": "more likely"
                },
                {
                    "type": "openpi_entity_gpt3",
                    "entity": "eggs",
                    "attribute": "cool",
                    "change": "less likely"
                }
            ],
            [
                {
                    "type": "step",
                    "step": "Turn off the burner and fill half of the omelet. "
                },
                {
                    "type": "multihop",
                    "event": "I eat the eggs safely.",
                    "change": "more likely"
                },
                {
                    "type": "openpi_entity_gpt3",
                    "entity": "omelet",
                    "attribute": "cool",
                    "change": "more likely"
                },
                {
                    "type": "openpi_entity_gpt3",
                    "entity": "omelet",
                    "attribute": "hot",
                    "change": "less likely"
                },
                {
                    "type": "openpi_entity_gpt3",
                    "entity": "egg whites",
                    "attribute": "hot",
                    "change": "more likely"
                },
                {
                    "type": "openpi_entity_gpt3",
                    "entity": "egg whites",
                    "attribute": "hot",
                    "change": "less likely"
                },
                {
                    "type": "openpi_entity_gpt3",
                    "entity": "mixture",
                    "attribute": "cool",
                    "change": "more likely"
                },
                {
                    "type": "openpi_entity_gpt3",
                    "entity": "mixture",
                    "attribute": "hot",
                    "change": "less likely"
                },
                {
                    "type": "openpi_entity_gpt3",
                    "entity": "burner",
                    "attribute": "off",
                    "change": "more likely"
                },
                {
                    "type": "openpi_entity_gpt3",
                    "entity": "burner",
                    "attribute": "on",
                    "change": "less likely"
                },
                {
                    "type": "openpi_entity_gpt3",
                    "entity": "mixture",
                    "attribute": "cool",
                    "change": "more likely"
                },
                {
                    "type": "openpi_entity_gpt3",
                    "entity": "mixture",
                    "attribute": "hot",
                    "change": "less likely"
                },
                {
                    "type": "openpi_entity_gpt3",
                    "entity": "egg whites",
                    "attribute": "cool",
                    "change": "more likely"
                },
                {
                    "type": "openpi_entity_gpt3",
                    "entity": "egg whites",
                    "attribute": "hot",
                    "change": "less likely"
                },
                {
                    "type": "openpi_entity_gpt3",
                    "entity": "skillet",
                    "attribute": "cool",
                    "change": "more likely"
                },
                {
                    "type": "openpi_entity_gpt3",
                    "entity": "skillet",
                    "attribute": "hot",
                    "change": "less likely"
                }
            ],
            [
                {
                    "type": "step",
                    "step": "Use a spatula to fold the omelet over the filling and serve it while it's hot."
                },
                {
                    "type": "openpi_entity_gpt3",
                    "entity": "omelet",
                    "attribute": "on plate",
                    "change": "more likely"
                },
                {
                    "type": "openpi_entity_gpt3",
                    "entity": "omelet",
                    "attribute": "in skillet",
                    "change": "less likely"
                },
                {
                    "type": "openpi_entity_gpt3",
                    "entity": "omelet",
                    "attribute": "cooked",
                    "change": "more likely"
                },
                {
                    "type": "openpi_entity_gpt3",
                    "entity": "omelet",
                    "attribute": "uncooked",
                    "change": "less likely"
                },
                {
                    "type": "openpi_entity_gpt3",
                    "entity": "spatula",
                    "attribute": "in hand",
                    "change": "more likely"
                },
                {
                    "type": "openpi_entity_gpt3",
                    "entity": "spatula",
                    "attribute": "in drawer",
                    "change": "less likely"
                },
                {
                    "type": "openpi_entity_gpt3",
                    "entity": "omelet",
                    "attribute": "cooked",
                    "change": "more likely"
                },
                {
                    "type": "openpi_entity_gpt3",
                    "entity": "omelet",
                    "attribute": "raw",
                    "change": "less likely"
                },
                {
                    "type": "openpi_entity_gpt3",
                    "entity": "omelet",
                    "attribute": "folded",
                    "change": "more likely"
                },
                {
                    "type": "openpi_entity_gpt3",
                    "entity": "omelet",
                    "attribute": "flat",
                    "change": "less likely"
                },
                {
                    "type": "openpi_entity_gpt3",
                    "entity": "spatula",
                    "attribute": "used to fold",
                    "change": "more likely"
                },
                {
                    "type": "openpi_entity_gpt3",
                    "entity": "spatula",
                    "attribute": "flat",
                    "change": "less likely"
                },
                {
                    "type": "openpi_entity_gpt3",
                    "entity": "omelet",
                    "attribute": "cooler",
                    "change": "more likely"
                },
                {
                    "type": "openpi_entity_gpt3",
                    "entity": "omelet",
                    "attribute": "hot",
                    "change": "less likely"
                }
            ]
        ]
    },
    "29": {
        "goal": "How to Cook BBQ Ribs",
        "annotator": "Pujun Guan",
        "steps": [
            [
                {
                    "step": "Start."
                }
            ],
            [
                {
                    "type": "step",
                    "step": "Choose which cut of ribs you want."
                },
                {
                    "type": "openpi_entity_gpt3",
                    "entity": "ribs",
                    "attribute": "chosen",
                    "change": "more likely"
                },
                {
                    "type": "openpi_entity_gpt3",
                    "entity": "ribs",
                    "attribute": "considered",
                    "change": "less likely"
                },
                {
                    "type": "openpi_entity_gpt3",
                    "entity": "ribs",
                    "attribute": "at your home",
                    "change": "more likely"
                },
                {
                    "type": "openpi_entity_gpt3",
                    "entity": "ribs",
                    "attribute": "at the store",
                    "change": "less likely"
                },
                {
                    "type": "openpi_entity_gpt3",
                    "entity": "ribs",
                    "attribute": "purchased",
                    "change": "more likely"
                },
                {
                    "type": "openpi_entity_gpt3",
                    "entity": "ribs",
                    "attribute": "at the store",
                    "change": "less likely"
                },
                {
                    "type": "openpi_entity_gpt3",
                    "entity": "ribs",
                    "attribute": "at home",
                    "change": "more likely"
                },
                {
                    "type": "openpi_entity_gpt3",
                    "entity": "ribs",
                    "attribute": "at the store",
                    "change": "less likely"
                },
                {
                    "type": "openpi_entity_gpt3",
                    "entity": "ribs",
                    "attribute": "purchased",
                    "change": "more likely"
                },
                {
                    "type": "openpi_entity_gpt3",
                    "entity": "ribs",
                    "attribute": "considered",
                    "change": "less likely"
                }
            ],
            [
                {
                    "type": "step",
                    "step": "Make the rub."
                },
                {
                    "type": "openpi_entity_gpt3",
                    "entity": "spices",
                    "attribute": "on meat",
                    "change": "more likely"
                },
                {
                    "type": "openpi_entity_gpt3",
                    "entity": "spices",
                    "attribute": "in cabinet",
                    "change": "less likely"
                },
                {
                    "type": "openpi_entity_gpt3",
                    "entity": "rub",
                    "attribute": "on the meat",
                    "change": "more likely"
                },
                {
                    "type": "openpi_entity_gpt3",
                    "entity": "rub",
                    "attribute": "in a container",
                    "change": "less likely"
                },
                {
                    "type": "openpi_entity_gpt3",
                    "entity": "meat",
                    "attribute": "cut up",
                    "change": "more likely"
                },
                {
                    "type": "openpi_entity_gpt3",
                    "entity": "meat",
                    "attribute": "whole",
                    "change": "less likely"
                },
                {
                    "type": "openpi_entity_gpt3",
                    "entity": "ingredients",
                    "attribute": "in bowl",
                    "change": "more likely"
                },
                {
                    "type": "openpi_entity_gpt3",
                    "entity": "ingredients",
                    "attribute": "in their place",
                    "change": "less likely"
                },
                {
                    "type": "openpi_entity_gpt3",
                    "entity": "spices",
                    "attribute": "in meat",
                    "change": "more likely"
                },
                {
                    "type": "openpi_entity_gpt3",
                    "entity": "spices",
                    "attribute": "in spice container",
                    "change": "less likely"
                },
                {
                    "type": "openpi_entity_gpt3",
                    "entity": "ingredients",
                    "attribute": "cooked",
                    "change": "more likely"
                },
                {
                    "type": "openpi_entity_gpt3",
                    "entity": "ingredients",
                    "attribute": "raw",
                    "change": "less likely"
                },
                {
                    "type": "openpi_entity_gpt3",
                    "entity": "ingredients",
                    "attribute": "mixed",
                    "change": "more likely"
                },
                {
                    "type": "openpi_entity_gpt3",
                    "entity": "ingredients",
                    "attribute": "separate",
                    "change": "less likely"
                },
                {
                    "type": "openpi_entity_gpt3",
                    "entity": "spices",
                    "attribute": "on meat",
                    "change": "more likely"
                },
                {
                    "type": "openpi_entity_gpt3",
                    "entity": "spices",
                    "attribute": "in spice box",
                    "change": "less likely"
                },
                {
                    "type": "openpi_entity_gpt3",
                    "entity": "ingredients",
                    "attribute": "mixed",
                    "change": "more likely"
                },
                {
                    "type": "openpi_entity_gpt3",
                    "entity": "ingredients",
                    "attribute": "separate",
                    "change": "less likely"
                }
            ],
            [
                {
                    "type": "step",
                    "step": "Make the mop (optional)."
                },
                {
                    "type": "openpi_entity_gpt3",
                    "entity": "mop",
                    "attribute": "on grill",
                    "change": "more likely"
                },
                {
                    "type": "openpi_entity_gpt3",
                    "entity": "mop",
                    "attribute": "in pantry",
                    "change": "less likely"
                },
                {
                    "type": "openpi_entity_gpt3",
                    "entity": "mop",
                    "attribute": "on the grill",
                    "change": "more likely"
                },
                {
                    "type": "openpi_entity_gpt3",
                    "entity": "mop",
                    "attribute": "in the drawer",
                    "change": "less likely"
                },
                {
                    "type": "openpi_entity_gpt3",
                    "entity": "mop",
                    "attribute": "made",
                    "change": "more likely"
                },
                {
                    "type": "openpi_entity_gpt3",
                    "entity": "mop",
                    "attribute": "unmade",
                    "change": "less likely"
                },
                {
                    "type": "openpi_entity_gpt3",
                    "entity": "mop",
                    "attribute": "on the grill",
                    "change": "more likely"
                },
                {
                    "type": "openpi_entity_gpt3",
                    "entity": "mop",
                    "attribute": "in the pantry",
                    "change": "less likely"
                }
            ],
            [
                {
                    "type": "step",
                    "step": "Trim the ribs and apply the rub."
                },
                {
                    "type": "openpi_entity_gpt3",
                    "entity": "cutting board",
                    "attribute": "dirty",
                    "change": "more likely"
                },
                {
                    "type": "openpi_entity_gpt3",
                    "entity": "cutting board",
                    "attribute": "clean",
                    "change": "less likely"
                },
                {
                    "type": "openpi_entity_gpt3",
                    "entity": "trimming",
                    "attribute": "on ribs",
                    "change": "more likely"
                },
                {
                    "type": "openpi_entity_gpt3",
                    "entity": "trimming",
                    "attribute": "in hand",
                    "change": "less likely"
                },
                {
                    "type": "openpi_entity_gpt3",
                    "entity": "ribs",
                    "attribute": "cut",
                    "change": "more likely"
                },
                {
                    "type": "openpi_entity_gpt3",
                    "entity": "ribs",
                    "attribute": "uncut",
                    "change": "less likely"
                },
                {
                    "type": "openpi_entity_gpt3",
                    "entity": "ribs",
                    "attribute": "cooked",
                    "change": "more likely"
                },
                {
                    "type": "openpi_entity_gpt3",
                    "entity": "ribs",
                    "attribute": "raw",
                    "change": "less likely"
                },
                {
                    "type": "openpi_entity_gpt3",
                    "entity": "ribs",
                    "attribute": "covered in rub",
                    "change": "more likely"
                },
                {
                    "type": "openpi_entity_gpt3",
                    "entity": "ribs",
                    "attribute": "bare",
                    "change": "less likely"
                },
                {
                    "type": "openpi_entity_gpt3",
                    "entity": "ribs",
                    "attribute": "trimmed",
                    "change": "more likely"
                },
                {
                    "type": "openpi_entity_gpt3",
                    "entity": "ribs",
                    "attribute": "uncut",
                    "change": "less likely"
                },
                {
                    "type": "openpi_entity_gpt3",
                    "entity": "ribs",
                    "attribute": "on tray",
                    "change": "more likely"
                },
                {
                    "type": "openpi_entity_gpt3",
                    "entity": "ribs",
                    "attribute": "on cutting board",
                    "change": "less likely"
                },
                {
                    "type": "openpi_entity_gpt3",
                    "entity": "rub",
                    "attribute": "on ribs",
                    "change": "more likely"
                },
                {
                    "type": "openpi_entity_gpt3",
                    "entity": "rub",
                    "attribute": "in container",
                    "change": "less likely"
                },
                {
                    "type": "openpi_entity_gpt3",
                    "entity": "ribs",
                    "attribute": "trimmed",
                    "change": "more likely"
                },
                {
                    "type": "openpi_entity_gpt3",
                    "entity": "ribs",
                    "attribute": "whole",
                    "change": "less likely"
                }
            ],
            [
                {
                    "type": "step",
                    "step": "For spare ribs, place the ribs on a covered barbecue grill at 225F (107C) for 5-6 hours."
                },
                {
                    "type": "entity",
                    "entity": "the ribs",
                    "attribute": "raw",
                    "change": "less likely"
                },
                {
                    "type": "multihop",
                    "event": "I eat the ribs safely.",
                    "change": "more likely"
                },
                {
                    "type": "openpi_entity_gpt3",
                    "entity": "ribs",
                    "attribute": "hot",
                    "change": "more likely"
                },
                {
                    "type": "openpi_entity_gpt3",
                    "entity": "ribs",
                    "attribute": "cold",
                    "change": "less likely"
                },
                {
                    "type": "openpi_entity_gpt3",
                    "entity": "spare ribs",
                    "attribute": "hot",
                    "change": "more likely"
                },
                {
                    "type": "openpi_entity_gpt3",
                    "entity": "spare ribs",
                    "attribute": "cold",
                    "change": "less likely"
                },
                {
                    "type": "openpi_entity_gpt3",
                    "entity": "grill",
                    "attribute": "hot",
                    "change": "more likely"
                },
                {
                    "type": "openpi_entity_gpt3",
                    "entity": "grill",
                    "attribute": "cool",
                    "change": "less likely"
                },
                {
                    "type": "openpi_entity_gpt3",
                    "entity": "spare ribs",
                    "attribute": "on the grill",
                    "change": "more likely"
                },
                {
                    "type": "openpi_entity_gpt3",
                    "entity": "spare ribs",
                    "attribute": "in the fridge",
                    "change": "less likely"
                },
                {
                    "type": "openpi_entity_gpt3",
                    "entity": "spare ribs",
                    "attribute": "hotter",
                    "change": "more likely"
                },
                {
                    "type": "openpi_entity_gpt3",
                    "entity": "spare ribs",
                    "attribute": "cooler",
                    "change": "less likely"
                }
            ]
        ]
    },
    "30": {
        "goal": "How to Make Kraft Macaroni and Cheese",
        "annotator": "Pujun Guan",
        "steps": [
            [
                {
                    "step": "Start."
                }
            ],
            [
                {
                    "type": "step",
                    "step": "Bring 6 cups (1.4 L) of water to a boil in a saucepan."
                },
                {
                    "type": "openpi_entity_gpt3",
                    "entity": "water",
                    "attribute": "boiling",
                    "change": "more likely"
                },
                {
                    "type": "openpi_entity_gpt3",
                    "entity": "water",
                    "attribute": "still",
                    "change": "less likely"
                },
                {
                    "type": "openpi_entity_gpt3",
                    "entity": "water",
                    "attribute": "hot",
                    "change": "more likely"
                },
                {
                    "type": "openpi_entity_gpt3",
                    "entity": "water",
                    "attribute": "cold",
                    "change": "less likely"
                },
                {
                    "type": "openpi_entity_gpt3",
                    "entity": "water",
                    "attribute": "hot",
                    "change": "more likely"
                },
                {
                    "type": "openpi_entity_gpt3",
                    "entity": "water",
                    "attribute": "cool",
                    "change": "less likely"
                },
                {
                    "type": "openpi_entity_gpt3",
                    "entity": "water",
                    "attribute": "boiling",
                    "change": "more likely"
                },
                {
                    "type": "openpi_entity_gpt3",
                    "entity": "water",
                    "attribute": "cold",
                    "change": "less likely"
                },
                {
                    "type": "openpi_entity_gpt3",
                    "entity": "saucepan",
                    "attribute": "hot",
                    "change": "more likely"
                },
                {
                    "type": "openpi_entity_gpt3",
                    "entity": "saucepan",
                    "attribute": "cool",
                    "change": "less likely"
                }
            ],
            [
                {
                    "type": "step",
                    "step": "Cook the macaroni for 7-8 minutes."
                },
                {
                    "type": "entity",
                    "entity": "the macaroni",
                    "attribute": "hard",
                    "change": "less likely"
                },
                {
                    "type": "openpi_entity_gpt3",
                    "entity": "macaroni",
                    "attribute": "hot",
                    "change": "more likely"
                },
                {
                    "type": "openpi_entity_gpt3",
                    "entity": "macaroni",
                    "attribute": "cool",
                    "change": "less likely"
                },
                {
                    "type": "openpi_entity_gpt3",
                    "entity": "macaroni",
                    "attribute": "cooked",
                    "change": "more likely"
                },
                {
                    "type": "openpi_entity_gpt3",
                    "entity": "macaroni",
                    "attribute": "raw",
                    "change": "less likely"
                },
                {
                    "type": "openpi_entity_gpt3",
                    "entity": "water",
                    "attribute": "hot",
                    "change": "more likely"
                },
                {
                    "type": "openpi_entity_gpt3",
                    "entity": "water",
                    "attribute": "cold",
                    "change": "less likely"
                },
                {
                    "type": "openpi_entity_gpt3",
                    "entity": "macaroni",
                    "attribute": "cooked",
                    "change": "more likely"
                },
                {
                    "type": "openpi_entity_gpt3",
                    "entity": "macaroni",
                    "attribute": "uncooked",
                    "change": "less likely"
                },
                {
                    "type": "openpi_entity_gpt3",
                    "entity": "macaroni",
                    "attribute": "hot",
                    "change": "more likely"
                },
                {
                    "type": "openpi_entity_gpt3",
                    "entity": "macaroni",
                    "attribute": "cold",
                    "change": "less likely"
                },
                {
                    "type": "openpi_entity_gpt3",
                    "entity": "macaroni",
                    "attribute": "soft",
                    "change": "more likely"
                },
                {
                    "type": "openpi_entity_gpt3",
                    "entity": "macaroni",
                    "attribute": "hard",
                    "change": "less likely"
                }
            ],
            [
                {
                    "type": "step",
                    "step": "Drain the water from the macaroni."
                },
                {
                    "type": "openpi_entity_gpt3",
                    "entity": "macaroni",
                    "attribute": "dry",
                    "change": "more likely"
                },
                {
                    "type": "openpi_entity_gpt3",
                    "entity": "macaroni",
                    "attribute": "wet",
                    "change": "less likely"
                },
                {
                    "type": "openpi_entity_gpt3",
                    "entity": "macaroni",
                    "attribute": "clean",
                    "change": "more likely"
                },
                {
                    "type": "openpi_entity_gpt3",
                    "entity": "macaroni",
                    "attribute": "dirty",
                    "change": "less likely"
                },
                {
                    "type": "openpi_entity_gpt3",
                    "entity": "macaroni",
                    "attribute": "drained",
                    "change": "more likely"
                },
                {
                    "type": "openpi_entity_gpt3",
                    "entity": "macaroni",
                    "attribute": "wet",
                    "change": "less likely"
                },
                {
                    "type": "openpi_entity_gpt3",
                    "entity": "saucepan",
                    "attribute": "empty",
                    "change": "more likely"
                },
                {
                    "type": "openpi_entity_gpt3",
                    "entity": "saucepan",
                    "attribute": "full",
                    "change": "less likely"
                },
                {
                    "type": "openpi_entity_gpt3",
                    "entity": "macaroni",
                    "attribute": "dry",
                    "change": "more likely"
                },
                {
                    "type": "openpi_entity_gpt3",
                    "entity": "macaroni",
                    "attribute": "wet",
                    "change": "less likely"
                },
                {
                    "type": "openpi_entity_gpt3",
                    "entity": "macaroni",
                    "attribute": "empty",
                    "change": "more likely"
                },
                {
                    "type": "openpi_entity_gpt3",
                    "entity": "macaroni",
                    "attribute": "full",
                    "change": "less likely"
                },
                {
                    "type": "openpi_entity_gpt3",
                    "entity": "water",
                    "attribute": "in drain",
                    "change": "more likely"
                },
                {
                    "type": "openpi_entity_gpt3",
                    "entity": "water",
                    "attribute": "in macaroni",
                    "change": "less likely"
                },
                {
                    "type": "openpi_entity_gpt3",
                    "entity": "saucepan",
                    "attribute": "lighter",
                    "change": "more likely"
                },
                {
                    "type": "openpi_entity_gpt3",
                    "entity": "saucepan",
                    "attribute": "heavier",
                    "change": "less likely"
                },
                {
                    "type": "openpi_entity_gpt3",
                    "entity": "macaroni",
                    "attribute": "lighter",
                    "change": "more likely"
                },
                {
                    "type": "openpi_entity_gpt3",
                    "entity": "macaroni",
                    "attribute": "heavier",
                    "change": "less likely"
                },
                {
                    "type": "openpi_entity_gpt3",
                    "entity": "water",
                    "attribute": "in sink",
                    "change": "more likely"
                },
                {
                    "type": "openpi_entity_gpt3",
                    "entity": "water",
                    "attribute": "in macaroni",
                    "change": "less likely"
                }
            ],
            [
                {
                    "type": "step",
                    "step": "Place the macaroni, margarine or butter, milk, and cheese sauce mix into the saucepan."
                },
                {
                    "type": "openpi_entity_gpt3",
                    "entity": "milk",
                    "attribute": "in pot",
                    "change": "more likely"
                },
                {
                    "type": "openpi_entity_gpt3",
                    "entity": "milk",
                    "attribute": "in container",
                    "change": "less likely"
                },
                {
                    "type": "openpi_entity_gpt3",
                    "entity": "and cheese mix",
                    "attribute": "drained",
                    "change": "more likely"
                },
                {
                    "type": "openpi_entity_gpt3",
                    "entity": "and cheese mix",
                    "attribute": "in pot",
                    "change": "less likely"
                },
                {
                    "type": "openpi_entity_gpt3",
                    "entity": "cheese sauce mix",
                    "attribute": "in pot",
                    "change": "more likely"
                },
                {
                    "type": "openpi_entity_gpt3",
                    "entity": "cheese sauce mix",
                    "attribute": "in container",
                    "change": "less likely"
                },
                {
                    "type": "openpi_entity_gpt3",
                    "entity": "macaroni",
                    "attribute": "in pan",
                    "change": "more likely"
                },
                {
                    "type": "openpi_entity_gpt3",
                    "entity": "macaroni",
                    "attribute": "in pot",
                    "change": "less likely"
                },
                {
                    "type": "openpi_entity_gpt3",
                    "entity": "and cheese mix",
                    "attribute": "now in the saucepan",
                    "change": "more likely"
                },
                {
                    "type": "openpi_entity_gpt3",
                    "entity": "and cheese mix",
                    "attribute": "in the pot",
                    "change": "less likely"
                },
                {
                    "type": "openpi_entity_gpt3",
                    "entity": "and cheese mix",
                    "attribute": "now drained",
                    "change": "more likely"
                },
                {
                    "type": "openpi_entity_gpt3",
                    "entity": "and cheese mix",
                    "attribute": "in the pot",
                    "change": "less likely"
                }
            ],
            [
                {
                    "type": "step",
                    "step": "Stir the ingredients to combine them."
                },
                {
                    "type": "entity",
                    "entity": "the cheese",
                    "attribute": "solid",
                    "change": "less likely"
                },
                {
                    "type": "openpi_entity_gpt3",
                    "entity": "cheese",
                    "attribute": "in the saucepan",
                    "change": "more likely"
                },
                {
                    "type": "openpi_entity_gpt3",
                    "entity": "cheese",
                    "attribute": "in the fridge",
                    "change": "less likely"
                },
                {
                    "type": "openpi_entity_gpt3",
                    "entity": "milk",
                    "attribute": "in the saucepan",
                    "change": "more likely"
                },
                {
                    "type": "openpi_entity_gpt3",
                    "entity": "milk",
                    "attribute": "in the fridge",
                    "change": "less likely"
                },
                {
                    "type": "openpi_entity_gpt3",
                    "entity": "ingredients",
                    "attribute": "mixed",
                    "change": "more likely"
                },
                {
                    "type": "openpi_entity_gpt3",
                    "entity": "ingredients",
                    "attribute": "separated",
                    "change": "less likely"
                },
                {
                    "type": "openpi_entity_gpt3",
                    "entity": "butter",
                    "attribute": "in the saucepan",
                    "change": "more likely"
                },
                {
                    "type": "openpi_entity_gpt3",
                    "entity": "butter",
                    "attribute": "in the fridge",
                    "change": "less likely"
                },
                {
                    "type": "openpi_entity_gpt3",
                    "entity": "macaroni",
                    "attribute": "in bowl",
                    "change": "more likely"
                },
                {
                    "type": "openpi_entity_gpt3",
                    "entity": "macaroni",
                    "attribute": "in saucepan",
                    "change": "less likely"
                },
                {
                    "type": "openpi_entity_gpt3",
                    "entity": "spoon",
                    "attribute": "in the bowl",
                    "change": "more likely"
                },
                {
                    "type": "openpi_entity_gpt3",
                    "entity": "spoon",
                    "attribute": "in the drawer",
                    "change": "less likely"
                },
                {
                    "type": "openpi_entity_gpt3",
                    "entity": "cheese",
                    "attribute": "soft",
                    "change": "more likely"
                },
                {
                    "type": "openpi_entity_gpt3",
                    "entity": "cheese",
                    "attribute": "hard",
                    "change": "less likely"
                },
                {
                    "type": "openpi_entity_gpt3",
                    "entity": "margarine",
                    "attribute": "in the saucepan",
                    "change": "more likely"
                },
                {
                    "type": "openpi_entity_gpt3",
                    "entity": "margarine",
                    "attribute": "in the fridge",
                    "change": "less likely"
                },
                {
                    "type": "openpi_entity_gpt3",
                    "entity": "macaroni",
                    "attribute": "soft",
                    "change": "more likely"
                },
                {
                    "type": "openpi_entity_gpt3",
                    "entity": "macaroni",
                    "attribute": "hard",
                    "change": "less likely"
                },
                {
                    "type": "openpi_entity_gpt3",
                    "entity": "macaroni",
                    "attribute": "in a bowl",
                    "change": "more likely"
                },
                {
                    "type": "openpi_entity_gpt3",
                    "entity": "macaroni",
                    "attribute": "in the saucepan",
                    "change": "less likely"
                }
            ],
            [
                {
                    "type": "step",
                    "step": "Serve the macaroni and cheese immediately or store it in the refrigerator."
                },
                {
                    "type": "multihop",
                    "event": "I eat the macaroni and cheese.",
                    "change": "more likely"
                },
                {
                    "type": "openpi_entity_gpt3",
                    "entity": "macaroni",
                    "attribute": "in refrigerator",
                    "change": "more likely"
                },
                {
                    "type": "openpi_entity_gpt3",
                    "entity": "macaroni",
                    "attribute": "in pan",
                    "change": "less likely"
                },
                {
                    "type": "openpi_entity_gpt3",
                    "entity": "macaroni",
                    "attribute": "in bowl",
                    "change": "more likely"
                },
                {
                    "type": "openpi_entity_gpt3",
                    "entity": "macaroni",
                    "attribute": "in pan",
                    "change": "less likely"
                },
                {
                    "type": "openpi_entity_gpt3",
                    "entity": "cheese",
                    "attribute": "in bowl",
                    "change": "more likely"
                },
                {
                    "type": "openpi_entity_gpt3",
                    "entity": "cheese",
                    "attribute": "in pan",
                    "change": "less likely"
                },
                {
                    "type": "openpi_entity_gpt3",
                    "entity": "macaroni",
                    "attribute": "in fridge",
                    "change": "more likely"
                },
                {
                    "type": "openpi_entity_gpt3",
                    "entity": "macaroni",
                    "attribute": "in pan",
                    "change": "less likely"
                }
            ]
        ]
    },
    "31": {
        "goal": "\ufeffCharge an iPhone",
        "annotator": "songqi li",
        "steps": [
            [
                {
                    "step": "Start."
                }
            ],
            [
                {
                    "type": "step",
                    "step": "Make sure you have your iPhone's charger cable."
                },
                {
                    "type": "openpi_entity_gpt3",
                    "entity": "charger cable",
                    "attribute": "in the hand",
                    "change": "more likely"
                },
                {
                    "type": "openpi_entity_gpt3",
                    "entity": "charger cable",
                    "attribute": "in the drawer",
                    "change": "less likely"
                },
                {
                    "type": "openpi_entity_gpt3",
                    "entity": "charger cable",
                    "attribute": "plugged in",
                    "change": "more likely"
                },
                {
                    "type": "openpi_entity_gpt3",
                    "entity": "charger cable",
                    "attribute": "unplugged",
                    "change": "less likely"
                },
                {
                    "type": "openpi_entity_gpt3",
                    "entity": "charger",
                    "attribute": "plugged in",
                    "change": "more likely"
                },
                {
                    "type": "openpi_entity_gpt3",
                    "entity": "charger",
                    "attribute": "unplugged",
                    "change": "less likely"
                }
            ],
            [
                {
                    "type": "step",
                    "step": "Find a USB port."
                },
                {
                    "type": "openpi_entity_gpt3",
                    "entity": "usb port",
                    "attribute": "found",
                    "change": "more likely"
                },
                {
                    "type": "openpi_entity_gpt3",
                    "entity": "usb port",
                    "attribute": "unknown",
                    "change": "less likely"
                },
                {
                    "type": "openpi_entity_gpt3",
                    "entity": "usb port",
                    "attribute": "in bedroom",
                    "change": "more likely"
                },
                {
                    "type": "openpi_entity_gpt3",
                    "entity": "usb port",
                    "attribute": "in kitchen",
                    "change": "less likely"
                },
                {
                    "type": "openpi_entity_gpt3",
                    "entity": "usb port",
                    "attribute": "on table",
                    "change": "more likely"
                },
                {
                    "type": "openpi_entity_gpt3",
                    "entity": "usb port",
                    "attribute": "in drawer",
                    "change": "less likely"
                },
                {
                    "type": "openpi_entity_gpt3",
                    "entity": "usb port",
                    "attribute": "in the room",
                    "change": "more likely"
                },
                {
                    "type": "openpi_entity_gpt3",
                    "entity": "usb port",
                    "attribute": "in the drawer",
                    "change": "less likely"
                },
                {
                    "type": "openpi_entity_gpt3",
                    "entity": "usb port",
                    "attribute": "in room",
                    "change": "more likely"
                },
                {
                    "type": "openpi_entity_gpt3",
                    "entity": "usb port",
                    "attribute": "in closet",
                    "change": "less likely"
                }
            ],
            [
                {
                    "type": "step",
                    "step": "Plug your iPhone's cable into the USB port."
                },
                {
                    "type": "openpi_entity_gpt3",
                    "entity": "usb port",
                    "attribute": "plugged in",
                    "change": "more likely"
                },
                {
                    "type": "openpi_entity_gpt3",
                    "entity": "usb port",
                    "attribute": "unplugged",
                    "change": "less likely"
                },
                {
                    "type": "openpi_entity_gpt3",
                    "entity": "cable",
                    "attribute": "plugged in",
                    "change": "more likely"
                },
                {
                    "type": "openpi_entity_gpt3",
                    "entity": "cable",
                    "attribute": "unplugged",
                    "change": "less likely"
                },
                {
                    "type": "openpi_entity_gpt3",
                    "entity": "usb port",
                    "attribute": "plugged in",
                    "change": "more likely"
                },
                {
                    "type": "openpi_entity_gpt3",
                    "entity": "usb port",
                    "attribute": "empty",
                    "change": "less likely"
                },
                {
                    "type": "openpi_entity_gpt3",
                    "entity": "cable",
                    "attribute": "plugged in",
                    "change": "more likely"
                },
                {
                    "type": "openpi_entity_gpt3",
                    "entity": "cable",
                    "attribute": "loose",
                    "change": "less likely"
                }
            ],
            [
                {
                    "type": "step",
                    "step": "Attach the cable to your iPhone."
                },
                {
                    "type": "multihop",
                    "event": "The iPhone has a cable connected to it.",
                    "change": "more likely"
                },
                {
                    "type": "openpi_entity_gpt3",
                    "entity": "cable",
                    "attribute": "attached",
                    "change": "more likely"
                },
                {
                    "type": "openpi_entity_gpt3",
                    "entity": "cable",
                    "attribute": "unattached",
                    "change": "less likely"
                },
                {
                    "type": "openpi_entity_gpt3",
                    "entity": "cable",
                    "attribute": "attached to the phone",
                    "change": "more likely"
                },
                {
                    "type": "openpi_entity_gpt3",
                    "entity": "cable",
                    "attribute": "on the table",
                    "change": "less likely"
                },
                {
                    "type": "openpi_entity_gpt3",
                    "entity": "cable",
                    "attribute": "attached to phone",
                    "change": "more likely"
                },
                {
                    "type": "openpi_entity_gpt3",
                    "entity": "cable",
                    "attribute": "unattached",
                    "change": "less likely"
                },
                {
                    "type": "openpi_entity_gpt3",
                    "entity": "cable",
                    "attribute": "attached",
                    "change": "more likely"
                },
                {
                    "type": "openpi_entity_gpt3",
                    "entity": "cable",
                    "attribute": "unattached",
                    "change": "less likely"
                },
                {
                    "type": "openpi_entity_gpt3",
                    "entity": "cable",
                    "attribute": "on the phone",
                    "change": "more likely"
                },
                {
                    "type": "openpi_entity_gpt3",
                    "entity": "cable",
                    "attribute": "on the table",
                    "change": "less likely"
                }
            ],
            [
                {
                    "type": "step",
                    "step": "Wait for the charging icon to appear."
                },
                {
                    "type": "entity",
                    "entity": "iPhone",
                    "attribute": "charging",
                    "change": "more likely"
                },
                {
                    "type": "openpi_entity_gpt3",
                    "entity": "charging icon",
                    "attribute": "present",
                    "change": "more likely"
                },
                {
                    "type": "openpi_entity_gpt3",
                    "entity": "charging icon",
                    "attribute": "absent",
                    "change": "less likely"
                },
                {
                    "type": "openpi_entity_gpt3",
                    "entity": "charging",
                    "attribute": "present",
                    "change": "more likely"
                },
                {
                    "type": "openpi_entity_gpt3",
                    "entity": "charging",
                    "attribute": "absent",
                    "change": "less likely"
                },
                {
                    "type": "openpi_entity_gpt3",
                    "entity": "charging",
                    "attribute": "on",
                    "change": "more likely"
                },
                {
                    "type": "openpi_entity_gpt3",
                    "entity": "charging",
                    "attribute": "off",
                    "change": "less likely"
                }
            ],
            [
                {
                    "type": "step",
                    "step": "Try a different USB port if it doesn not work."
                },
                {
                    "type": "openpi_entity_gpt3",
                    "entity": "iphone",
                    "attribute": "charged",
                    "change": "more likely"
                },
                {
                    "type": "openpi_entity_gpt3",
                    "entity": "iphone",
                    "attribute": "uncharged",
                    "change": "less likely"
                },
                {
                    "type": "openpi_entity_gpt3",
                    "entity": "usb port",
                    "attribute": "unplugged",
                    "change": "more likely"
                },
                {
                    "type": "openpi_entity_gpt3",
                    "entity": "usb port",
                    "attribute": "plugged in",
                    "change": "less likely"
                },
                {
                    "type": "openpi_entity_gpt3",
                    "entity": "charger cable",
                    "attribute": "plugged in",
                    "change": "more likely"
                },
                {
                    "type": "openpi_entity_gpt3",
                    "entity": "charger cable",
                    "attribute": "unplugged",
                    "change": "less likely"
                },
                {
                    "type": "openpi_entity_gpt3",
                    "entity": "usb port",
                    "attribute": "selected",
                    "change": "more likely"
                },
                {
                    "type": "openpi_entity_gpt3",
                    "entity": "usb port",
                    "attribute": "unselected",
                    "change": "less likely"
                }
            ]
        ]
    },
    "32": {
        "goal": "Cut Iceberg Lettuce",
        "annotator": "songqi li",
        "steps": [
            [
                {
                    "step": "Start."
                }
            ],
            [
                {
                    "type": "step",
                    "step": "Remove the core."
                },
                {
                    "type": "openpi_entity_gpt3",
                    "entity": "core",
                    "attribute": "out of machine",
                    "change": "more likely"
                },
                {
                    "type": "openpi_entity_gpt3",
                    "entity": "core",
                    "attribute": "in machine",
                    "change": "less likely"
                },
                {
                    "type": "openpi_entity_gpt3",
                    "entity": "core",
                    "attribute": "out",
                    "change": "more likely"
                },
                {
                    "type": "openpi_entity_gpt3",
                    "entity": "core",
                    "attribute": "in machine",
                    "change": "less likely"
                },
                {
                    "type": "openpi_entity_gpt3",
                    "entity": "core",
                    "attribute": "out of the machine",
                    "change": "more likely"
                },
                {
                    "type": "openpi_entity_gpt3",
                    "entity": "core",
                    "attribute": "in the machine",
                    "change": "less likely"
                },
                {
                    "type": "openpi_entity_gpt3",
                    "entity": "core",
                    "attribute": "removed",
                    "change": "more likely"
                },
                {
                    "type": "openpi_entity_gpt3",
                    "entity": "core",
                    "attribute": "in the machine",
                    "change": "less likely"
                }
            ],
            [
                {
                    "type": "step",
                    "step": "Remove the outer leaves."
                },
                {
                    "type": "openpi_entity_gpt3",
                    "entity": "leaves",
                    "attribute": "off the plant",
                    "change": "more likely"
                },
                {
                    "type": "openpi_entity_gpt3",
                    "entity": "leaves",
                    "attribute": "on the plant",
                    "change": "less likely"
                },
                {
                    "type": "openpi_entity_gpt3",
                    "entity": "leaves",
                    "attribute": "removed",
                    "change": "more likely"
                },
                {
                    "type": "openpi_entity_gpt3",
                    "entity": "leaves",
                    "attribute": "on the plant",
                    "change": "less likely"
                },
                {
                    "type": "openpi_entity_gpt3",
                    "entity": "leaves",
                    "attribute": "off the plant",
                    "change": "more likely"
                },
                {
                    "type": "openpi_entity_gpt3",
                    "entity": "leaves",
                    "attribute": "attached to the plant",
                    "change": "less likely"
                },
                {
                    "type": "openpi_entity_gpt3",
                    "entity": "leaves",
                    "attribute": "off the core",
                    "change": "more likely"
                },
                {
                    "type": "openpi_entity_gpt3",
                    "entity": "leaves",
                    "attribute": "on the core",
                    "change": "less likely"
                }
            ],
            [
                {
                    "type": "step",
                    "step": "Cut the head in half."
                },
                {
                    "type": "entity",
                    "entity": "Iceberg Lettuce",
                    "attribute": "cut in half",
                    "change": "more likely"
                },
                {
                    "type": "multihop",
                    "event": "Iceberg Lettuce is ready for cooking.",
                    "change": "more likely"
                },
                {
                    "type": "openpi_entity_gpt3",
                    "entity": "head",
                    "attribute": "cut in half",
                    "change": "more likely"
                },
                {
                    "type": "openpi_entity_gpt3",
                    "entity": "head",
                    "attribute": "whole",
                    "change": "less likely"
                },
                {
                    "type": "openpi_entity_gpt3",
                    "entity": "head",
                    "attribute": "cut in half",
                    "change": "more likely"
                },
                {
                    "type": "openpi_entity_gpt3",
                    "entity": "head",
                    "attribute": "whole",
                    "change": "less likely"
                },
                {
                    "type": "openpi_entity_gpt3",
                    "entity": "head",
                    "attribute": "cut in half",
                    "change": "more likely"
                },
                {
                    "type": "openpi_entity_gpt3",
                    "entity": "head",
                    "attribute": "whole",
                    "change": "less likely"
                }
            ]
        ]
    },
    "33": {
        "goal": "Open a Coconut",
        "annotator": "songqi li",
        "steps": [
            [
                {
                    "step": "Start."
                }
            ],
            [
                {
                    "type": "step",
                    "step": "Preheat the oven."
                },
                {
                    "type": "entity",
                    "entity": "oven",
                    "attribute": "hot",
                    "change": "more likely"
                },
                {
                    "type": "openpi_entity_gpt3",
                    "entity": "oven",
                    "attribute": "preheated",
                    "change": "more likely"
                },
                {
                    "type": "openpi_entity_gpt3",
                    "entity": "oven",
                    "attribute": "cold",
                    "change": "less likely"
                },
                {
                    "type": "openpi_entity_gpt3",
                    "entity": "oven",
                    "attribute": "on",
                    "change": "more likely"
                },
                {
                    "type": "openpi_entity_gpt3",
                    "entity": "oven",
                    "attribute": "off",
                    "change": "less likely"
                },
                {
                    "type": "openpi_entity_gpt3",
                    "entity": "oven",
                    "attribute": "hot",
                    "change": "more likely"
                },
                {
                    "type": "openpi_entity_gpt3",
                    "entity": "oven",
                    "attribute": "cold",
                    "change": "less likely"
                }
            ],
            [
                {
                    "type": "step",
                    "step": "Place the coconut on a pan and bake it for 10 minutes."
                },
                {
                    "type": "openpi_entity_gpt3",
                    "entity": "coconut",
                    "attribute": "hot",
                    "change": "more likely"
                },
                {
                    "type": "openpi_entity_gpt3",
                    "entity": "coconut",
                    "attribute": "room temperature",
                    "change": "less likely"
                },
                {
                    "type": "openpi_entity_gpt3",
                    "entity": "pan",
                    "attribute": "hot",
                    "change": "more likely"
                },
                {
                    "type": "openpi_entity_gpt3",
                    "entity": "pan",
                    "attribute": "cool",
                    "change": "less likely"
                },
                {
                    "type": "openpi_entity_gpt3",
                    "entity": "coconut",
                    "attribute": "in oven",
                    "change": "more likely"
                },
                {
                    "type": "openpi_entity_gpt3",
                    "entity": "coconut",
                    "attribute": "on counter",
                    "change": "less likely"
                },
                {
                    "type": "openpi_entity_gpt3",
                    "entity": "oven",
                    "attribute": "hot",
                    "change": "more likely"
                },
                {
                    "type": "openpi_entity_gpt3",
                    "entity": "oven",
                    "attribute": "cold",
                    "change": "less likely"
                },
                {
                    "type": "openpi_entity_gpt3",
                    "entity": "coconut",
                    "attribute": "hot",
                    "change": "more likely"
                },
                {
                    "type": "openpi_entity_gpt3",
                    "entity": "coconut",
                    "attribute": "cool",
                    "change": "less likely"
                }
            ],
            [
                {
                    "type": "step",
                    "step": "Remove the coconut and wrap it in a towel."
                },
                {
                    "type": "openpi_entity_gpt3",
                    "entity": "towel",
                    "attribute": "on the counter",
                    "change": "more likely"
                },
                {
                    "type": "openpi_entity_gpt3",
                    "entity": "towel",
                    "attribute": "on the counter",
                    "change": "less likely"
                },
                {
                    "type": "openpi_entity_gpt3",
                    "entity": "towel",
                    "attribute": "on counter",
                    "change": "more likely"
                },
                {
                    "type": "openpi_entity_gpt3",
                    "entity": "towel",
                    "attribute": "in drawer",
                    "change": "less likely"
                },
                {
                    "type": "openpi_entity_gpt3",
                    "entity": "coconut",
                    "attribute": "on counter",
                    "change": "more likely"
                },
                {
                    "type": "openpi_entity_gpt3",
                    "entity": "coconut",
                    "attribute": "in oven",
                    "change": "less likely"
                }
            ],
            [
                {
                    "type": "step",
                    "step": "Place the coconut in a garbage bag and hit it against a hard surface."
                },
                {
                    "type": "openpi_entity_gpt3",
                    "entity": "towel",
                    "attribute": "in hand",
                    "change": "more likely"
                },
                {
                    "type": "openpi_entity_gpt3",
                    "entity": "towel",
                    "attribute": "on counter",
                    "change": "less likely"
                },
                {
                    "type": "openpi_entity_gpt3",
                    "entity": "towel",
                    "attribute": "in the trash",
                    "change": "more likely"
                },
                {
                    "type": "openpi_entity_gpt3",
                    "entity": "towel",
                    "attribute": "on the counter",
                    "change": "less likely"
                },
                {
                    "type": "openpi_entity_gpt3",
                    "entity": "coconut",
                    "attribute": "on counter",
                    "change": "more likely"
                },
                {
                    "type": "openpi_entity_gpt3",
                    "entity": "coconut",
                    "attribute": "in oven",
                    "change": "less likely"
                },
                {
                    "type": "openpi_entity_gpt3",
                    "entity": "coconut",
                    "attribute": "in trash",
                    "change": "more likely"
                },
                {
                    "type": "openpi_entity_gpt3",
                    "entity": "coconut",
                    "attribute": "in oven",
                    "change": "less likely"
                }
            ],
            [
                {
                    "type": "step",
                    "step": "Place a knife between the shell and meat to separate them."
                },
                {
                    "type": "openpi_entity_gpt3",
                    "entity": "towel",
                    "attribute": "dirty",
                    "change": "more likely"
                },
                {
                    "type": "openpi_entity_gpt3",
                    "entity": "towel",
                    "attribute": "clean",
                    "change": "less likely"
                },
                {
                    "type": "openpi_entity_gpt3",
                    "entity": "pan",
                    "attribute": "dirty",
                    "change": "more likely"
                },
                {
                    "type": "openpi_entity_gpt3",
                    "entity": "pan",
                    "attribute": "clean",
                    "change": "less likely"
                },
                {
                    "type": "openpi_entity_gpt3",
                    "entity": "knife",
                    "attribute": "dirty",
                    "change": "more likely"
                },
                {
                    "type": "openpi_entity_gpt3",
                    "entity": "knife",
                    "attribute": "clean",
                    "change": "less likely"
                },
                {
                    "type": "openpi_entity_gpt3",
                    "entity": "meat",
                    "attribute": "in bowl",
                    "change": "more likely"
                },
                {
                    "type": "openpi_entity_gpt3",
                    "entity": "meat",
                    "attribute": "on pan",
                    "change": "less likely"
                },
                {
                    "type": "openpi_entity_gpt3",
                    "entity": "knife",
                    "attribute": "in hand",
                    "change": "more likely"
                },
                {
                    "type": "openpi_entity_gpt3",
                    "entity": "knife",
                    "attribute": "in drawer",
                    "change": "less likely"
                },
                {
                    "type": "openpi_entity_gpt3",
                    "entity": "meat",
                    "attribute": "removed",
                    "change": "more likely"
                },
                {
                    "type": "openpi_entity_gpt3",
                    "entity": "meat",
                    "attribute": "on shell",
                    "change": "less likely"
                },
                {
                    "type": "openpi_entity_gpt3",
                    "entity": "shell",
                    "attribute": "off pan",
                    "change": "more likely"
                },
                {
                    "type": "openpi_entity_gpt3",
                    "entity": "shell",
                    "attribute": "on pan",
                    "change": "less likely"
                },
                {
                    "type": "openpi_entity_gpt3",
                    "entity": "shell",
                    "attribute": "separated from meat",
                    "change": "more likely"
                },
                {
                    "type": "openpi_entity_gpt3",
                    "entity": "shell",
                    "attribute": "touching meat",
                    "change": "less likely"
                },
                {
                    "type": "openpi_entity_gpt3",
                    "entity": "shell",
                    "attribute": "removed",
                    "change": "more likely"
                },
                {
                    "type": "openpi_entity_gpt3",
                    "entity": "shell",
                    "attribute": "on pan",
                    "change": "less likely"
                }
            ],
            [
                {
                    "type": "step",
                    "step": "Peel the fiber away from the coconut meat. "
                },
                {
                    "type": "openpi_entity_gpt3",
                    "entity": "fiber",
                    "attribute": "peeled off the coconut",
                    "change": "more likely"
                },
                {
                    "type": "openpi_entity_gpt3",
                    "entity": "fiber",
                    "attribute": "on the coconut",
                    "change": "less likely"
                },
                {
                    "type": "openpi_entity_gpt3",
                    "entity": "fiber",
                    "attribute": "in the trash",
                    "change": "more likely"
                },
                {
                    "type": "openpi_entity_gpt3",
                    "entity": "fiber",
                    "attribute": "on the coconut",
                    "change": "less likely"
                },
                {
                    "type": "openpi_entity_gpt3",
                    "entity": "knife",
                    "attribute": "dirty",
                    "change": "more likely"
                },
                {
                    "type": "openpi_entity_gpt3",
                    "entity": "knife",
                    "attribute": "clean",
                    "change": "less likely"
                },
                {
                    "type": "openpi_entity_gpt3",
                    "entity": "fiber",
                    "attribute": "in trash",
                    "change": "more likely"
                },
                {
                    "type": "openpi_entity_gpt3",
                    "entity": "fiber",
                    "attribute": "on the coconut",
                    "change": "less likely"
                }
            ]
        ]
    },
    "34": {
        "goal": "Snap Your Fingers",
        "annotator": "songqi li",
        "steps": [
            [
                {
                    "step": "Start."
                }
            ],
            [
                {
                    "type": "step",
                    "step": "Press your thumb to your middle finger."
                },
                {
                    "type": "openpi_entity_gpt3",
                    "entity": "thumb",
                    "attribute": "on the finger",
                    "change": "more likely"
                },
                {
                    "type": "openpi_entity_gpt3",
                    "entity": "thumb",
                    "attribute": "on the table",
                    "change": "less likely"
                },
                {
                    "type": "openpi_entity_gpt3",
                    "entity": "thumb",
                    "attribute": "pressed",
                    "change": "more likely"
                },
                {
                    "type": "openpi_entity_gpt3",
                    "entity": "thumb",
                    "attribute": "relaxed",
                    "change": "less likely"
                },
                {
                    "type": "openpi_entity_gpt3",
                    "entity": "finger",
                    "attribute": "pressed",
                    "change": "more likely"
                },
                {
                    "type": "openpi_entity_gpt3",
                    "entity": "finger",
                    "attribute": "relaxed",
                    "change": "less likely"
                },
                {
                    "type": "openpi_entity_gpt3",
                    "entity": "middle finger",
                    "attribute": "pressed",
                    "change": "more likely"
                },
                {
                    "type": "openpi_entity_gpt3",
                    "entity": "middle finger",
                    "attribute": "relaxed",
                    "change": "less likely"
                }
            ],
            [
                {
                    "type": "step",
                    "step": "Fold your ring finger and pinky down."
                },
                {
                    "type": "entity",
                    "entity": "ring finger",
                    "attribute": "folded",
                    "change": "more likely"
                },
                {
                    "type": "openpi_entity_gpt3",
                    "entity": "fingers",
                    "attribute": "bent",
                    "change": "more likely"
                },
                {
                    "type": "openpi_entity_gpt3",
                    "entity": "fingers",
                    "attribute": "straight",
                    "change": "less likely"
                },
                {
                    "type": "openpi_entity_gpt3",
                    "entity": "pinky",
                    "attribute": "on table",
                    "change": "more likely"
                },
                {
                    "type": "openpi_entity_gpt3",
                    "entity": "pinky",
                    "attribute": "in air",
                    "change": "less likely"
                },
                {
                    "type": "openpi_entity_gpt3",
                    "entity": "fingers",
                    "attribute": "on table",
                    "change": "more likely"
                },
                {
                    "type": "openpi_entity_gpt3",
                    "entity": "fingers",
                    "attribute": "in air",
                    "change": "less likely"
                }
            ],
            [
                {
                    "type": "step",
                    "step": "Build up a little pressure between your thumb and middle finger."
                },
                {
                    "type": "openpi_entity_gpt3",
                    "entity": "thumb",
                    "attribute": "tight",
                    "change": "more likely"
                },
                {
                    "type": "openpi_entity_gpt3",
                    "entity": "thumb",
                    "attribute": "loose",
[truncated: 2,817,982 more chars]
