# Supplementary material
Source: ML conference proceedings conference paper supplement (https://aclanthology.org/2023.findings-eacl.31)
Supplement: dataset [file 2023.findings-eacl.31.dataset.zip › causal_reasoning_of_entities_and_events/gpt3/legacy_trials/weiqiu1.0/0hop-pred.json]

{
    "1": {
        "goal": "Sear a steak",
        "annotator": "Harry",
        "steps": [
            [
                {
                    "type": "step",
                    "step": "Start."
                }
            ],
            [
                {
                    "type": "step",
                    "step": "Set the steak at room temperature."
                },
                {
                    "type": "openpi_entity_gpt3",
                    "entity": "steak",
                    "attribute": "room temperature",
                    "change": "more likely"
                },
                {
                    "type": "openpi_entity_gpt3",
                    "entity": "steak",
                    "attribute": "cold",
                    "change": "less likely"
                },
                {
                    "type": "openpi_entity_gpt3",
                    "entity": "steak",
                    "attribute": "on counter",
                    "change": "more likely"
                },
                {
                    "type": "openpi_entity_gpt3",
                    "entity": "steak",
                    "attribute": "in package",
                    "change": "less likely"
                },
                {
                    "type": "openpi_entity_gpt3",
                    "entity": "steak",
                    "attribute": "hot",
                    "change": "more likely"
                },
                {
                    "type": "openpi_entity_gpt3",
                    "entity": "steak",
                    "attribute": "cold",
                    "change": "less likely"
                }
            ],
            [
                {
                    "type": "step",
                    "step": "Heat the pan."
                },
                {
                    "type": "entity",
                    "entity": "the pan",
                    "attribute": "hot",
                    "change": "more likely"
                },
                {
                    "type": "multihop",
                    "event": "I touch the pan without getting burned.",
                    "change": "less likely"
                },
                {
                    "type": "openpi_entity_gpt3",
                    "entity": "pan",
                    "attribute": "hot",
                    "change": "more likely"
                },
                {
                    "type": "openpi_entity_gpt3",
                    "entity": "pan",
                    "attribute": "cold",
                    "change": "less likely"
                },
                {
                    "type": "openpi_entity_gpt3",
                    "entity": "stove",
                    "attribute": "hot",
                    "change": "more likely"
                },
                {
                    "type": "openpi_entity_gpt3",
                    "entity": "stove",
                    "attribute": "cold",
                    "change": "less likely"
                },
                {
                    "type": "openpi_entity_gpt3",
                    "entity": "pan",
                    "attribute": "hot",
                    "change": "more likely"
                },
                {
                    "type": "openpi_entity_gpt3",
                    "entity": "pan",
                    "attribute": "cool",
                    "change": "less likely"
                }
            ],
            [
                {
                    "type": "step",
                    "step": "Put olive oil in the pan until smoking."
                },
                {
                    "type": "entity",
                    "entity": "the pan",
                    "attribute": "greased",
                    "change": "more likely"
                },
                {
                    "type": "multihop",
                    "event": "A sizzling sound can be heard if I add vegetables to the pan.",
                    "change": "more likely"
                },
                {
                    "type": "openpi_entity_gpt3",
                    "entity": "olive oil",
                    "attribute": "liquid",
                    "change": "more likely"
                },
                {
                    "type": "openpi_entity_gpt3",
                    "entity": "olive oil",
                    "attribute": "solid",
                    "change": "less likely"
                },
                {
                    "type": "openpi_entity_gpt3",
                    "entity": "pan",
                    "attribute": "hot",
                    "change": "more likely"
                },
                {
                    "type": "openpi_entity_gpt3",
                    "entity": "pan",
                    "attribute": "cold",
                    "change": "less likely"
                },
                {
                    "type": "openpi_entity_gpt3",
                    "entity": "olive oil",
                    "attribute": "in pan",
                    "change": "more likely"
                },
                {
                    "type": "openpi_entity_gpt3",
                    "entity": "olive oil",
                    "attribute": "in bottle",
                    "change": "less likely"
                },
                {
                    "type": "openpi_entity_gpt3",
                    "entity": "pan",
                    "attribute": "hot",
                    "change": "more likely"
                },
                {
                    "type": "openpi_entity_gpt3",
                    "entity": "pan",
                    "attribute": "cool",
                    "change": "less likely"
                }
            ],
            [
                {
                    "type": "step",
                    "step": "Add the steak and sear until both sides are browned."
                },
                {
                    "type": "entity",
                    "entity": "the steak",
                    "attribute": "cooked",
                    "change": "more likely"
                },
                {
                    "type": "multihop",
                    "event": "I eat the steak without getting sick.",
                    "change": "more likely"
                },
                {
                    "type": "openpi_entity_gpt3",
                    "entity": "pan",
                    "attribute": "hot",
                    "change": "more likely"
                },
                {
                    "type": "openpi_entity_gpt3",
                    "entity": "pan",
                    "attribute": "cold",
                    "change": "less likely"
                },
                {
                    "type": "openpi_entity_gpt3",
                    "entity": "steak",
                    "attribute": "hot",
                    "change": "more likely"
                },
                {
                    "type": "openpi_entity_gpt3",
                    "entity": "steak",
                    "attribute": "cold",
                    "change": "less likely"
                },
                {
                    "type": "openpi_entity_gpt3",
                    "entity": "pan",
                    "attribute": "hot",
                    "change": "more likely"
                },
                {
                    "type": "openpi_entity_gpt3",
                    "entity": "pan",
                    "attribute": "cool",
                    "change": "less likely"
                },
                {
                    "type": "openpi_entity_gpt3",
                    "entity": "steak",
                    "attribute": "cooked",
                    "change": "more likely"
                },
                {
                    "type": "openpi_entity_gpt3",
                    "entity": "steak",
                    "attribute": "raw",
                    "change": "less likely"
                },
                {
                    "type": "openpi_entity_gpt3",
                    "entity": "steak",
                    "attribute": "browned",
                    "change": "more likely"
                },
                {
                    "type": "openpi_entity_gpt3",
                    "entity": "steak",
                    "attribute": "pink",
                    "change": "less likely"
                }
            ],
            [
                {
                    "type": "step",
                    "step": "Place the pan in the oven until desired cookedness."
                },
                {
                    "type": "entity",
                    "entity": "the steak",
                    "attribute": "cooked",
                    "change": "more likely"
                },
                {
                    "type": "multihop",
                    "event": "I eat the steak without getting sick.",
                    "change": "more likely"
                },
                {
                    "type": "openpi_entity_gpt3",
                    "entity": "pan",
                    "attribute": "hot",
                    "change": "more likely"
                },
                {
                    "type": "openpi_entity_gpt3",
                    "entity": "pan",
                    "attribute": "cold",
                    "change": "less likely"
                },
                {
                    "type": "openpi_entity_gpt3",
                    "entity": "steak",
                    "attribute": "hot",
                    "change": "more likely"
                },
                {
                    "type": "openpi_entity_gpt3",
                    "entity": "steak",
                    "attribute": "cold",
                    "change": "less likely"
                },
                {
                    "type": "openpi_entity_gpt3",
                    "entity": "steak",
                    "attribute": "cooked",
                    "change": "more likely"
                },
                {
                    "type": "openpi_entity_gpt3",
                    "entity": "steak",
                    "attribute": "cold",
                    "change": "less likely"
                },
                {
                    "type": "openpi_entity_gpt3",
                    "entity": "pan",
                    "attribute": "hot",
                    "change": "more likely"
                },
                {
                    "type": "openpi_entity_gpt3",
                    "entity": "pan",
                    "attribute": "cool",
                    "change": "less likely"
                },
                {
                    "type": "openpi_entity_gpt3",
                    "entity": "oven",
                    "attribute": "hot",
                    "change": "more likely"
                },
                {
                    "type": "openpi_entity_gpt3",
                    "entity": "oven",
                    "attribute": "cold",
                    "change": "less likely"
                }
            ],
            [
                {
                    "type": "step",
                    "step": "Remove the steak from the pan and serve with sauce."
                },
                {
                    "type": "openpi_entity_gpt3",
                    "entity": "steak",
                    "attribute": "on table",
                    "change": "more likely"
                },
                {
                    "type": "openpi_entity_gpt3",
                    "entity": "steak",
                    "attribute": "in oven",
                    "change": "less likely"
                },
                {
                    "type": "openpi_entity_gpt3",
                    "entity": "steak",
                    "attribute": "out of oven",
                    "change": "more likely"
                },
                {
                    "type": "openpi_entity_gpt3",
                    "entity": "steak",
                    "attribute": "in oven",
                    "change": "less likely"
                },
                {
                    "type": "openpi_entity_gpt3",
                    "entity": "steak",
                    "attribute": "on plate",
                    "change": "more likely"
                },
                {
                    "type": "openpi_entity_gpt3",
                    "entity": "steak",
                    "attribute": "in pan",
                    "change": "less likely"
                },
                {
                    "type": "openpi_entity_gpt3",
                    "entity": "steak",
                    "attribute": "removed from oven",
                    "change": "more likely"
                },
                {
                    "type": "openpi_entity_gpt3",
                    "entity": "steak",
                    "attribute": "in oven",
                    "change": "less likely"
                },
                {
                    "type": "openpi_entity_gpt3",
                    "entity": "sauce",
                    "attribute": "on steak",
                    "change": "more likely"
                },
                {
                    "type": "openpi_entity_gpt3",
                    "entity": "sauce",
                    "attribute": "in pan",
                    "change": "less likely"
                },
                {
                    "type": "openpi_entity_gpt3",
                    "entity": "steak",
                    "attribute": "removed from pan",
                    "change": "more likely"
                },
                {
                    "type": "openpi_entity_gpt3",
                    "entity": "steak",
                    "attribute": "in pan",
                    "change": "less likely"
                }
            ],
            [
                {
                    "type": "step",
                    "step": "Let the pan cool and wash it."
                },
                {
                    "type": "entity",
                    "entity": "the pan",
                    "attribute": "hot",
                    "change": "less likely"
                },
                {
                    "type": "entity",
                    "entity": "the pan",
                    "attribute": "greased",
                    "change": "less likely"
                },
                {
                    "type": "multihop",
                    "event": "I touch the pan without getting burned.",
                    "change": "more likely"
                },
                {
                    "type": "multihop",
                    "event": "A sizzling sound can be heard if I add vegetables to the pan.",
                    "change": "less likely"
                },
                {
                    "type": "openpi_entity_gpt3",
                    "entity": "pan",
                    "attribute": "cool",
                    "change": "more likely"
                },
                {
                    "type": "openpi_entity_gpt3",
                    "entity": "pan",
                    "attribute": "hot",
                    "change": "less likely"
                }
            ]
        ]
    },
    "2": {
        "goal": "Do laundry with a washing machine",
        "annotator": "Harry",
        "steps": [
            [
                {
                    "type": "step",
                    "step": "Start."
                }
            ],
            [
                {
                    "type": "step",
                    "step": "Open the door of the washing machine."
                },
                {
                    "type": "openpi_entity_gpt3",
                    "entity": "door",
                    "attribute": "open",
                    "change": "more likely"
                },
                {
                    "type": "openpi_entity_gpt3",
                    "entity": "door",
                    "attribute": "closed",
                    "change": "less likely"
                }
            ],
            [
                {
                    "type": "step",
                    "step": "Put the laundry inside the washing machine."
                },
                {
                    "type": "openpi_entity_gpt3",
                    "entity": "laundry",
                    "attribute": "inside washing machine",
                    "change": "more likely"
                },
                {
                    "type": "openpi_entity_gpt3",
                    "entity": "laundry",
                    "attribute": "outside of washing machine",
                    "change": "less likely"
                }
            ],
            [
                {
                    "type": "step",
                    "step": "Close the door."
                },
                {
                    "type": "openpi_entity_gpt3",
                    "entity": "door",
                    "attribute": "closed",
                    "change": "more likely"
                },
                {
                    "type": "openpi_entity_gpt3",
                    "entity": "door",
                    "attribute": "open",
                    "change": "less likely"
                },
                {
                    "type": "openpi_entity_gpt3",
                    "entity": "door",
                    "attribute": "closed",
                    "change": "more likely"
                },
                {
                    "type": "openpi_entity_gpt3",
                    "entity": "door",
                    "attribute": "open",
                    "change": "less likely"
                }
            ],
            [
                {
                    "type": "step",
                    "step": "Add detergents to the detergent compartment."
                },
                {
                    "type": "openpi_entity_gpt3",
                    "entity": "detergents",
                    "attribute": "in the washing machine",
                    "change": "more likely"
                },
                {
                    "type": "openpi_entity_gpt3",
                    "entity": "detergents",
                    "attribute": "in the container",
                    "change": "less likely"
                },
                {
                    "type": "openpi_entity_gpt3",
                    "entity": "detergent compartment",
                    "attribute": "lighter",
                    "change": "more likely"
                },
                {
                    "type": "openpi_entity_gpt3",
                    "entity": "detergent compartment",
                    "attribute": "heavier",
                    "change": "less likely"
                },
                {
                    "type": "openpi_entity_gpt3",
                    "entity": "washing machine",
                    "attribute": "full",
                    "change": "more likely"
                },
                {
                    "type": "openpi_entity_gpt3",
                    "entity": "washing machine",
                    "attribute": "empty",
                    "change": "less likely"
                },
                {
                    "type": "openpi_entity_gpt3",
                    "entity": "detergent compartment",
                    "attribute": "full",
                    "change": "more likely"
                },
                {
                    "type": "openpi_entity_gpt3",
                    "entity": "detergent compartment",
                    "attribute": "empty",
                    "change": "less likely"
                },
                {
                    "type": "openpi_entity_gpt3",
                    "entity": "detergents",
                    "attribute": "in the washing machine",
                    "change": "more likely"
                },
                {
                    "type": "openpi_entity_gpt3",
                    "entity": "detergents",
                    "attribute": "in the detergent compartment",
                    "change": "less likely"
                }
            ],
            [
                {
                    "type": "step",
                    "step": "Choose a cycle."
                },
                {
                    "type": "openpi_entity_gpt3",
                    "entity": "machine",
                    "attribute": "on",
                    "change": "more likely"
                },
                {
                    "type": "openpi_entity_gpt3",
                    "entity": "machine",
                    "attribute": "off",
                    "change": "less likely"
                },
                {
                    "type": "openpi_entity_gpt3",
                    "entity": "cycle",
                    "attribute": "selected",
                    "change": "more likely"
                },
                {
                    "type": "openpi_entity_gpt3",
                    "entity": "cycle",
                    "attribute": "unselected",
                    "change": "less likely"
                },
                {
                    "type": "openpi_entity_gpt3",
                    "entity": "washing machine",
                    "attribute": "on",
                    "change": "more likely"
                },
                {
                    "type": "openpi_entity_gpt3",
                    "entity": "washing machine",
                    "attribute": "off",
                    "change": "less likely"
                }
            ],
            [
                {
                    "type": "step",
                    "step": "Press start and wait for the cycle to finish."
                },
                {
                    "type": "entity",
                    "entity": "the clothes",
                    "attribute": "wet",
                    "change": "more likely"
                },
                {
                    "type": "entity",
                    "entity": "the washing machine door",
                    "attribute": "locked",
                    "change": "more likely"
                },
                {
                    "type": "multihop",
                    "event": "I wear the clothes and stay dry.",
                    "change": "less likely"
                },
                {
                    "type": "multihop",
                    "event": "I push to open the door of the washing machine.",
                    "change": "less likely"
                },
                {
                    "type": "openpi_entity_gpt3",
                    "entity": "cycle",
                    "attribute": "selected",
                    "change": "more likely"
                },
                {
                    "type": "openpi_entity_gpt3",
                    "entity": "cycle",
                    "attribute": "unselected",
                    "change": "less likely"
                },
                {
                    "type": "openpi_entity_gpt3",
                    "entity": "washing machine",
                    "attribute": "on",
                    "change": "more likely"
                },
                {
                    "type": "openpi_entity_gpt3",
                    "entity": "washing machine",
                    "attribute": "off",
                    "change": "less likely"
                },
                {
                    "type": "openpi_entity_gpt3",
                    "entity": "cycle",
                    "attribute": "finished",
                    "change": "more likely"
                },
                {
                    "type": "openpi_entity_gpt3",
                    "entity": "cycle",
                    "attribute": "starting",
                    "change": "less likely"
                },
                {
                    "type": "openpi_entity_gpt3",
                    "entity": "button",
                    "attribute": "pressed",
                    "change": "more likely"
                },
                {
                    "type": "openpi_entity_gpt3",
                    "entity": "button",
                    "attribute": "unpressed",
                    "change": "less likely"
                },
                {
                    "type": "openpi_entity_gpt3",
                    "entity": "washing machine",
                    "attribute": "on",
                    "change": "more likely"
                },
                {
                    "type": "openpi_entity_gpt3",
                    "entity": "washing machine",
                    "attribute": "off",
                    "change": "less likely"
                }
            ],
            [
                {
                    "type": "step",
                    "step": "When the cycle ends, move the clothes to the dryer."
                },
                {
                    "type": "entity",
                    "entity": "the washing machine door",
                    "attribute": "locked",
                    "change": "less likely"
                },
                {
                    "type": "entity",
                    "entity": "the clothes",
                    "attribute": "clean",
                    "change": "more likely"
                },
                {
                    "type": "multihop",
                    "event": "I push to open the door of the washing machine.",
                    "change": "more likely"
                },
                {
                    "type": "openpi_entity_gpt3",
                    "entity": "clothes",
                    "attribute": "dry",
                    "change": "more likely"
                },
                {
                    "type": "openpi_entity_gpt3",
                    "entity": "clothes",
                    "attribute": "wet",
                    "change": "less likely"
                },
                {
                    "type": "openpi_entity_gpt3",
                    "entity": "clothes",
                    "attribute": "in the dryer",
                    "change": "more likely"
                },
                {
                    "type": "openpi_entity_gpt3",
                    "entity": "clothes",
                    "attribute": "in the washer",
                    "change": "less likely"
                }
            ]
        ]
    },
    "3": {
        "goal": "Arrange Flowers in a Vase",
        "annotator": "Harry",
        "steps": [
            [
                {
                    "type": "step",
                    "step": "Start."
                }
            ],
            [
                {
                    "type": "step",
                    "step": "Choose the right vase."
                },
                {
                    "type": "openpi_entity_gpt3",
                    "entity": "vase",
                    "attribute": "at home",
                    "change": "more likely"
                },
                {
                    "type": "openpi_entity_gpt3",
                    "entity": "vase",
                    "attribute": "at store",
                    "change": "less likely"
                },
                {
                    "type": "openpi_entity_gpt3",
                    "entity": "vase",
                    "attribute": "chosen",
                    "change": "more likely"
                },
                {
                    "type": "openpi_entity_gpt3",
                    "entity": "vase",
                    "attribute": "considered",
                    "change": "less likely"
                },
                {
                    "type": "openpi_entity_gpt3",
                    "entity": "you",
                    "attribute": "at the store",
                    "change": "more likely"
                },
                {
                    "type": "openpi_entity_gpt3",
                    "entity": "you",
                    "attribute": "elsewhere",
                    "change": "less likely"
                },
                {
                    "type": "openpi_entity_gpt3",
                    "entity": "you",
                    "attribute": "at the store",
                    "change": "more likely"
                },
                {
                    "type": "openpi_entity_gpt3",
                    "entity": "you",
                    "attribute": "at home",
                    "change": "less likely"
                }
            ],
            [
                {
                    "type": "step",
                    "step": "Use a clear elastic hair tie to gather flowers together."
                },
                {
                    "type": "multihop",
                    "event": "The flowers fall apart.",
                    "change": "less likely"
                },
                {
                    "type": "openpi_entity_gpt3",
                    "entity": "flowers",
                    "attribute": "tied",
                    "change": "more likely"
                },
                {
                    "type": "openpi_entity_gpt3",
                    "entity": "flowers",
                    "attribute": "loose",
                    "change": "less likely"
                },
                {
                    "type": "openpi_entity_gpt3",
                    "entity": "elastic hair tie",
                    "attribute": "used",
                    "change": "more likely"
                },
                {
                    "type": "openpi_entity_gpt3",
                    "entity": "elastic hair tie",
                    "attribute": "unused",
                    "change": "less likely"
                }
            ],
            [
                {
                    "type": "step",
                    "step": "Pour fresh, cool water in your vase."
                },
                {
                    "type": "entity",
                    "entity": "the vase",
                    "attribute": "empty",
                    "change": "less likely"
                },
                {
                    "type": "openpi_entity_gpt3",
                    "entity": "vase",
                    "attribute": "full",
                    "change": "more likely"
                },
                {
                    "type": "openpi_entity_gpt3",
                    "entity": "vase",
                    "attribute": "empty",
                    "change": "less likely"
                },
                {
                    "type": "openpi_entity_gpt3",
                    "entity": "water",
                    "attribute": "in vase",
                    "change": "more likely"
                },
                {
                    "type": "openpi_entity_gpt3",
                    "entity": "water",
                    "attribute": "in pipes",
                    "change": "less likely"
                },
                {
                    "type": "openpi_entity_gpt3",
                    "entity": "water",
                    "attribute": "in the vase",
                    "change": "more likely"
                },
                {
                    "type": "openpi_entity_gpt3",
                    "entity": "water",
                    "attribute": "in the pipes",
                    "change": "less likely"
                },
                {
                    "type": "openpi_entity_gpt3",
                    "entity": "vase",
                    "attribute": "wet",
                    "change": "more likely"
                },
                {
                    "type": "openpi_entity_gpt3",
                    "entity": "vase",
                    "attribute": "dry",
                    "change": "less likely"
                },
                {
                    "type": "openpi_entity_gpt3",
                    "entity": "vase",
                    "attribute": "wet",
                    "change": "more likely"
                },
                {
                    "type": "openpi_entity_gpt3",
                    "entity": "vase",
                    "attribute": "dry",
                    "change": "less likely"
                },
                {
                    "type": "openpi_entity_gpt3",
                    "entity": "water",
                    "attribute": "in vase",
                    "change": "more likely"
                },
                {
                    "type": "openpi_entity_gpt3",
                    "entity": "water",
                    "attribute": "in faucet",
                    "change": "less likely"
                }
            ],
            [
                {
                    "type": "step",
                    "step": "Add a couple of drops of bleach to the water."
                },
                {
                    "type": "openpi_entity_gpt3",
                    "entity": "bleach",
                    "attribute": "in vase",
                    "change": "more likely"
                },
                {
                    "type": "openpi_entity_gpt3",
                    "entity": "bleach",
                    "attribute": "in bottle",
                    "change": "less likely"
                },
                {
                    "type": "openpi_entity_gpt3",
                    "entity": "bleach",
                    "attribute": "in water",
                    "change": "more likely"
                },
                {
                    "type": "openpi_entity_gpt3",
                    "entity": "bleach",
                    "attribute": "in bottle",
                    "change": "less likely"
                },
                {
                    "type": "openpi_entity_gpt3",
                    "entity": "water",
                    "attribute": "colored",
                    "change": "more likely"
                },
                {
                    "type": "openpi_entity_gpt3",
                    "entity": "water",
                    "attribute": "clear",
                    "change": "less likely"
                }
            ],
            [
                {
                    "type": "step",
                    "step": "Organize your flowers and trim off leaves."
                },
                {
                    "type": "openpi_entity_gpt3",
                    "entity": "flowers",
                    "attribute": "in the trash",
                    "change": "more likely"
                },
                {
                    "type": "openpi_entity_gpt3",
                    "entity": "flowers",
                    "attribute": "in the vase",
                    "change": "less likely"
                },
                {
                    "type": "openpi_entity_gpt3",
                    "entity": "flowers",
                    "attribute": "organized",
                    "change": "more likely"
                },
                {
                    "type": "openpi_entity_gpt3",
                    "entity": "flowers",
                    "attribute": "disorganized",
                    "change": "less likely"
                },
                {
                    "type": "openpi_entity_gpt3",
                    "entity": "leaves",
                    "attribute": "in the trash",
                    "change": "more likely"
                },
                {
                    "type": "openpi_entity_gpt3",
                    "entity": "leaves",
                    "attribute": "in the vase",
                    "change": "less likely"
                }
            ],
            [
                {
                    "type": "step",
                    "step": "Cut the flower stems with a sharp knife or garden clippers."
                },
                {
                    "type": "openpi_entity_gpt3",
                    "entity": "flower stems",
                    "attribute": "on cutting board",
                    "change": "more likely"
                },
                {
                    "type": "openpi_entity_gpt3",
                    "entity": "flower stems",
                    "attribute": "on vase",
                    "change": "less likely"
                },
                {
                    "type": "openpi_entity_gpt3",
                    "entity": "flower stems",
                    "attribute": "cut from flowers",
                    "change": "more likely"
                },
                {
                    "type": "openpi_entity_gpt3",
                    "entity": "flower stems",
                    "attribute": "attached to flowers",
                    "change": "less likely"
                },
                {
                    "type": "openpi_entity_gpt3",
                    "entity": "flower stems",
                    "attribute": "cut",
                    "change": "more likely"
                },
                {
                    "type": "openpi_entity_gpt3",
                    "entity": "flower stems",
                    "attribute": "whole",
                    "change": "less likely"
                },
                {
                    "type": "openpi_entity_gpt3",
                    "entity": "flower stems",
                    "attribute": "on cutting board",
                    "change": "more likely"
                },
                {
                    "type": "openpi_entity_gpt3",
                    "entity": "flower stems",
                    "attribute": "in vase",
                    "change": "less likely"
                }
            ],
            [
                {
                    "type": "step",
                    "step": "Insert the flowers into the vase"
                },
                {
                    "type": "entity",
                    "entity": "the flowers",
                    "attribute": "in the vase",
                    "change": "more likely"
                },
                {
                    "type": "multihop",
                    "event": "The flowers are wet.",
                    "change": "more likely"
                },
                {
                    "type": "openpi_entity_gpt3",
                    "entity": "vase",
                    "attribute": "in the hand",
                    "change": "more likely"
                },
                {
                    "type": "openpi_entity_gpt3",
                    "entity": "vase",
                    "attribute": "on the table",
                    "change": "less likely"
                },
                {
                    "type": "openpi_entity_gpt3",
                    "entity": "flowers",
                    "attribute": "in the vase",
                    "change": "more likely"
                },
                {
                    "type": "openpi_entity_gpt3",
                    "entity": "flowers",
                    "attribute": "on the table",
                    "change": "less likely"
                },
                {
                    "type": "openpi_entity_gpt3",
                    "entity": "flowers",
                    "attribute": "in vase",
                    "change": "more likely"
                },
                {
                    "type": "openpi_entity_gpt3",
                    "entity": "flowers",
                    "attribute": "on table",
                    "change": "less likely"
                },
                {
                    "type": "openpi_entity_gpt3",
                    "entity": "flowers",
                    "attribute": "inside of vase",
                    "change": "more likely"
                },
                {
                    "type": "openpi_entity_gpt3",
                    "entity": "flowers",
                    "attribute": "outside of vase",
                    "change": "less likely"
                }
            ]
        ]
    },
    "4": {
        "goal": "Wash sneakers",
        "annotator": "Harry",
        "steps": [
            [
                {
                    "type": "step",
                    "step": "Start."
                }
            ],
            [
                {
                    "type": "step",
                    "step": "Brush off dirt from the surface of the sneakers."
                },
                {
                    "type": "openpi_entity_gpt3",
                    "entity": "sneakers",
                    "attribute": "clean",
                    "change": "more likely"
                },
                {
                    "type": "openpi_entity_gpt3",
                    "entity": "sneakers",
                    "attribute": "dirty",
                    "change": "less likely"
                },
                {
                    "type": "openpi_entity_gpt3",
                    "entity": "dirt",
                    "attribute": "on rag",
                    "change": "more likely"
                },
                {
                    "type": "openpi_entity_gpt3",
                    "entity": "dirt",
                    "attribute": "on shoes",
                    "change": "less likely"
                },
                {
                    "type": "openpi_entity_gpt3",
                    "entity": "dirt",
                    "attribute": "on rag",
                    "change": "more likely"
                },
                {
                    "type": "openpi_entity_gpt3",
                    "entity": "dirt",
                    "attribute": "on sneakers",
                    "change": "less likely"
                },
                {
                    "type": "openpi_entity_gpt3",
                    "entity": "dirt",
                    "attribute": "on rag",
                    "change": "more likely"
                },
                {
                    "type": "openpi_entity_gpt3",
                    "entity": "dirt",
                    "attribute": "on surface",
                    "change": "less likely"
                },
                {
                    "type": "openpi_entity_gpt3",
                    "entity": "rag",
                    "attribute": "dirty",
                    "change": "more likely"
                },
                {
                    "type": "openpi_entity_gpt3",
                    "entity": "rag",
                    "attribute": "clean",
                    "change": "less likely"
                }
            ],
            [
                {
                    "type": "step",
                    "step": "Remove shoelaces."
                },
                {
                    "type": "entity",
                    "entity": "the shoelaces",
                    "attribute": "on the sneakers",
                    "change": "less likely"
                },
                {
                    "type": "entity",
                    "entity": "the sneakers",
                    "attribute": "wearable",
                    "change": "less likely"
                },
                {
                    "type": "multihop",
                    "event": "I put on the sneakers and go outside.",
                    "change": "less likely"
                },
                {
                    "type": "openpi_entity_gpt3",
                    "entity": "shoelaces",
                    "attribute": "in the trash",
                    "change": "more likely"
                },
                {
                    "type": "openpi_entity_gpt3",
                    "entity": "shoelaces",
                    "attribute": "on the shoe",
                    "change": "less likely"
                },
                {
                    "type": "openpi_entity_gpt3",
                    "entity": "shoelaces",
                    "attribute": "in the trash",
                    "change": "more likely"
                },
                {
                    "type": "openpi_entity_gpt3",
                    "entity": "shoelaces",
                    "attribute": "on the floor",
                    "change": "less likely"
                }
            ],
            [
                {
                    "type": "step",
                    "step": "Rinse the shoelaces in soapy water and air dry."
                },
                {
                    "type": "openpi_entity_gpt3",
                    "entity": "soap",
                    "attribute": "in the drain",
                    "change": "more likely"
                },
                {
                    "type": "openpi_entity_gpt3",
                    "entity": "soap",
                    "attribute": "in the sink",
                    "change": "less likely"
                },
                {
                    "type": "openpi_entity_gpt3",
                    "entity": "shoelaces",
                    "attribute": "dry",
                    "change": "more likely"
                },
                {
                    "type": "openpi_entity_gpt3",
                    "entity": "shoelaces",
                    "attribute": "wet",
                    "change": "less likely"
                },
                {
                    "type": "openpi_entity_gpt3",
                    "entity": "soap",
                    "attribute": "in the sink",
                    "change": "more likely"
                },
                {
                    "type": "openpi_entity_gpt3",
                    "entity": "soap",
                    "attribute": "in the sink",
                    "change": "less likely"
                },
                {
                    "type": "openpi_entity_gpt3",
                    "entity": "water",
                    "attribute": "in the drain",
                    "change": "more likely"
                },
                {
                    "type": "openpi_entity_gpt3",
                    "entity": "water",
                    "attribute": "in the sink",
                    "change": "less likely"
                }
            ],
            [
                {
                    "type": "step",
                    "step": "Apply mild detergent to the sneakers and rub gently."
                },
                {
                    "type": "entity",
                    "entity": "the sneakers",
                    "attribute": "wet",
                    "change": "more likely"
                },
                {
                    "type": "multihop",
                    "event": "The sneakers are damp.",
                    "change": "more likely"
                },
                {
                    "type": "openpi_entity_gpt3",
                    "entity": "sneakers",
                    "attribute": "clean",
                    "change": "more likely"
                },
                {
                    "type": "openpi_entity_gpt3",
                    "entity": "sneakers",
                    "attribute": "dirty",
                    "change": "less likely"
                },
                {
                    "type": "openpi_entity_gpt3",
                    "entity": "detergent",
                    "attribute": "on sneakers",
                    "change": "more likely"
                },
                {
                    "type": "openpi_entity_gpt3",
                    "entity": "detergent",
                    "attribute": "in bottle",
                    "change": "less likely"
                },
                {
                    "type": "openpi_entity_gpt3",
                    "entity": "sneakers",
                    "attribute": "dry",
                    "change": "more likely"
                },
                {
                    "type": "openpi_entity_gpt3",
                    "entity": "sneakers",
                    "attribute": "wet",
                    "change": "less likely"
                }
            ],
            [
                {
                    "type": "step",
                    "step": "Use a wet towel to blot the sneakers. "
                },
                {
                    "type": "openpi_entity_gpt3",
                    "entity": "towel",
                    "attribute": "on the sneakers",
                    "change": "more likely"
                },
                {
                    "type": "openpi_entity_gpt3",
                    "entity": "towel",
                    "attribute": "in the drawer",
                    "change": "less likely"
                },
                {
                    "type": "openpi_entity_gpt3",
                    "entity": "towel",
                    "attribute": "on the floor",
                    "change": "more likely"
                },
                {
                    "type": "openpi_entity_gpt3",
                    "entity": "towel",
                    "attribute": "in the drawer",
                    "change": "less likely"
                },
                {
                    "type": "openpi_entity_gpt3",
                    "entity": "sneakers",
                    "attribute": "wet",
                    "change": "more likely"
                },
                {
                    "type": "openpi_entity_gpt3",
                    "entity": "sneakers",
                    "attribute": "dry",
                    "change": "less likely"
                },
                {
                    "type": "openpi_entity_gpt3",
                    "entity": "detergent",
                    "attribute": "in the towel",
                    "change": "more likely"
                },
                {
                    "type": "openpi_entity_gpt3",
                    "entity": "detergent",
                    "attribute": "in the sneakers",
                    "change": "less likely"
                }
            ],
            [
                {
                    "type": "step",
                    "step": "Air dry the sneakers."
                },
                {
                    "type": "entity",
                    "entity": "the sneakers",
                    "attribute": "wet",
                    "change": "less likely"
                },
                {
                    "type": "multihop",
                    "event": "The sneakers are damp.",
                    "change": "less likely"
                },
                {
                    "type": "openpi_entity_gpt3",
                    "entity": "towel",
                    "attribute": "on the sneakers",
                    "change": "more likely"
                },
                {
                    "type": "openpi_entity_gpt3",
                    "entity": "towel",
                    "attribute": "in the air",
                    "change": "less likely"
                },
                {
                    "type": "openpi_entity_gpt3",
                    "entity": "towel",
                    "attribute": "on the sneakers",
                    "change": "more likely"
                },
                {
                    "type": "openpi_entity_gpt3",
                    "entity": "towel",
                    "attribute": "in the drawer",
                    "change": "less likely"
                },
                {
                    "type": "openpi_entity_gpt3",
                    "entity": "sneakers",
                    "attribute": "dry",
                    "change": "more likely"
                },
                {
                    "type": "openpi_entity_gpt3",
                    "entity": "sneakers",
                    "attribute": "wet",
                    "change": "less likely"
                },
                {
                    "type": "openpi_entity_gpt3",
                    "entity": "sneakers",
                    "attribute": "cool",
                    "change": "more likely"
                },
                {
                    "type": "openpi_entity_gpt3",
                    "entity": "sneakers",
                    "attribute": "warm",
                    "change": "less likely"
                },
                {
                    "type": "openpi_entity_gpt3",
                    "entity": "sneakers",
                    "attribute": "dry",
                    "change": "more likely"
                },
                {
                    "type": "openpi_entity_gpt3",
                    "entity": "sneakers",
                    "attribute": "wet",
                    "change": "less likely"
                }
            ],
            [
                {
                    "type": "step",
                    "step": "Put the shoelaces back to the sneakers."
                },
                {
                    "type": "entity",
                    "entity": "the shoelaces",
                    "attribute": "on the sneakers",
                    "change": "more likely"
                },
                {
                    "type": "entity",
                    "entity": "the sneakers",
                    "attribute": "wearable",
                    "change": "more likely"
                },
                {
                    "type": "multihop",
                    "event": "I put on the sneakers and go outside.",
                    "change": "more likely"
                },
                {
                    "type": "openpi_entity_gpt3",
                    "entity": "sneakers",
                    "attribute": "washed",
                    "change": "more likely"
                },
                {
                    "type": "openpi_entity_gpt3",
                    "entity": "sneakers",
                    "attribute": "unwashed",
                    "change": "less likely"
                },
                {
                    "type": "openpi_entity_gpt3",
                    "entity": "sneakers",
                    "attribute": "washed",
                    "change": "more likely"
                },
                {
                    "type": "openpi_entity_gpt3",
                    "entity": "sneakers",
                    "attribute": "unwashed",
                    "change": "less likely"
                },
                {
                    "type": "openpi_entity_gpt3",
                    "entity": "shoes",
                    "attribute": "on the floor",
                    "change": "more likely"
                },
                {
                    "type": "openpi_entity_gpt3",
                    "entity": "shoes",
                    "attribute": "on the table",
                    "change": "less likely"
                },
                {
                    "type": "openpi_entity_gpt3",
                    "entity": "shoelaces",
                    "attribute": "in the sneakers",
                    "change": "more likely"
                },
                {
                    "type": "openpi_entity_gpt3",
                    "entity": "shoelaces",
                    "attribute": "on the table",
                    "change": "less likely"
                },
                {
                    "type": "openpi_entity_gpt3",
                    "entity": "sneakers",
                    "attribute": "on the floor",
                    "change": "more likely"
                },
                {
                    "type": "openpi_entity_gpt3",
                    "entity": "sneakers",
                    "attribute": "on the table",
                    "change": "less likely"
                },
                {
                    "type": "openpi_entity_gpt3",
                    "entity": "towel",
                    "attribute": "on the sneakers",
                    "change": "more likely"
                },
                {
                    "type": "openpi_entity_gpt3",
                    "entity": "towel",
                    "attribute": "on the table",
                    "change": "less likely"
                }
            ]
        ]
    },
    "5": {
        "goal": "Steam broccoli",
        "annotator": "Harry",
        "steps": [
            [
                {
                    "type": "step",
                    "step": "Start."
                }
            ],
            [
                {
                    "type": "step",
                    "step": "Clean the broccoli."
                },
                {
                    "type": "openpi_entity_gpt3",
                    "entity": "broccoli",
                    "attribute": "clean",
                    "change": "more likely"
                },
                {
                    "type": "openpi_entity_gpt3",
                    "entity": "broccoli",
                    "attribute": "covered in dirt",
                    "change": "less likely"
                },
                {
                    "type": "openpi_entity_gpt3",
                    "entity": "dirt",
                    "attribute": "on the counter",
                    "change": "more likely"
                },
                {
                    "type": "openpi_entity_gpt3",
                    "entity": "dirt",
                    "attribute": "on the broccoli",
                    "change": "less likely"
                },
                {
                    "type": "openpi_entity_gpt3",
                    "entity": "counter",
                    "attribute": "dirty",
                    "change": "more likely"
                },
                {
                    "type": "openpi_entity_gpt3",
                    "entity": "counter",
                    "attribute": "clean",
                    "change": "less likely"
                },
                {
                    "type": "openpi_entity_gpt3",
                    "entity": "broccoli",
                    "attribute": "clean",
                    "change": "more likely"
                },
                {
                    "type": "openpi_entity_gpt3",
                    "entity": "broccoli",
                    "attribute": "dirty",
                    "change": "less likely"
                }
            ],
            [
                {
                    "type": "step",
                    "step": "Trim the stem and cut the florets."
                },
                {
                    "type": "openpi_entity_gpt3",
                    "entity": "broccoli florets",
                    "attribute": "shorter",
                    "change": "more likely"
                },
                {
                    "type": "openpi_entity_gpt3",
                    "entity": "broccoli florets",
                    "attribute": "longer",
                    "change": "less likely"
                },
                {
                    "type": "openpi_entity_gpt3",
                    "entity": "cutting board",
                    "attribute": "dirty",
                    "change": "more likely"
                },
                {
                    "type": "openpi_entity_gpt3",
                    "entity": "cutting board",
                    "attribute": "clean",
                    "change": "less likely"
                },
                {
                    "type": "openpi_entity_gpt3",
                    "entity": "broccoli florets",
                    "attribute": "cut",
                    "change": "more likely"
                },
                {
                    "type": "openpi_entity_gpt3",
                    "entity": "broccoli florets",
                    "attribute": "whole",
                    "change": "less likely"
                },
                {
                    "type": "openpi_entity_gpt3",
                    "entity": "stem",
                    "attribute": "trimmed",
                    "change": "more likely"
                },
                {
                    "type": "openpi_entity_gpt3",
                    "entity": "stem",
                    "attribute": "whole",
                    "change": "less likely"
                },
                {
                    "type": "openpi_entity_gpt3",
                    "entity": "broccoli florets",
                    "attribute": "smaller",
                    "change": "more likely"
                },
                {
                    "type": "openpi_entity_gpt3",
                    "entity": "broccoli florets",
                    "attribute": "larger",
                    "change": "less likely"
                },
                {
                    "type": "openpi_entity_gpt3",
                    "entity": "knife",
                    "attribute": "dirty",
                    "change": "more likely"
                },
                {
                    "type": "openpi_entity_gpt3",
                    "entity": "knife",
                    "attribute": "clean",
                    "change": "less likely"
                },
                {
                    "type": "openpi_entity_gpt3",
                    "entity": "stem",
                    "attribute": "cut",
                    "change": "more likely"
                },
                {
                    "type": "openpi_entity_gpt3",
                    "entity": "stem",
                    "attribute": "whole",
                    "change": "less likely"
                }
            ],
            [
                {
                    "type": "step",
                    "step": "Place a steamer basket in a saucepan."
                },
                {
                    "type": "openpi_entity_gpt3",
                    "entity": "steamer basket",
                    "attribute": "on the stove top",
                    "change": "more likely"
                },
                {
                    "type": "openpi_entity_gpt3",
                    "entity": "steamer basket",
                    "attribute": "in the cupboard",
                    "change": "less likely"
                },
                {
                    "type": "openpi_entity_gpt3",
                    "entity": "saucepan",
                    "attribute": "heavier",
                    "change": "more likely"
                },
                {
                    "type": "openpi_entity_gpt3",
                    "entity": "saucepan",
                    "attribute": "lighter",
                    "change": "less likely"
                },
                {
                    "type": "openpi_entity_gpt3",
                    "entity": "saucepan",
                    "attribute": "in the kitchen",
                    "change": "more likely"
                },
                {
                    "type": "openpi_entity_gpt3",
                    "entity": "saucepan",
                    "attribute": "on the counter",
                    "change": "less likely"
                },
                {
                    "type": "openpi_entity_gpt3",
                    "entity": "saucepan",
                    "attribute": "full",
                    "change": "more likely"
                },
                {
                    "type": "openpi_entity_gpt3",
                    "entity": "saucepan",
                    "attribute": "empty",
                    "change": "less likely"
                },
                {
                    "type": "openpi_entity_gpt3",
                    "entity": "saucepan",
                    "attribute": "on the stove top",
                    "change": "more likely"
                },
                {
                    "type": "openpi_entity_gpt3",
                    "entity": "saucepan",
                    "attribute": "in the cupboard",
                    "change": "less likely"
                },
                {
                    "type": "openpi_entity_gpt3",
                    "entity": "steamer basket",
                    "attribute": "on stove",
                    "change": "more likely"
                },
                {
                    "type": "openpi_entity_gpt3",
                    "entity": "steamer basket",
                    "attribute": "in cupboard",
                    "change": "less likely"
                },
                {
                    "type": "openpi_entity_gpt3",
                    "entity": "saucepan",
                    "attribute": "on stove",
                    "change": "more likely"
                },
                {
                    "type": "openpi_entity_gpt3",
                    "entity": "saucepan",
                    "attribute": "in cupboard",
                    "change": "less likely"
                },
                {
                    "type": "openpi_entity_gpt3",
                    "entity": "saucepan",
                    "attribute": "hot",
                    "change": "more likely"
                },
                {
                    "type": "openpi_entity_gpt3",
                    "entity": "saucepan",
                    "attribute": "cool",
                    "change": "less likely"
                }
            ],
            [
                {
                    "type": "step",
                    "step": "Place the broccoli in the steamer basket."
                },
                {
                    "type": "openpi_entity_gpt3",
                    "entity": "steamer basket",
                    "attribute": "in the pan",
                    "change": "more likely"
                },
                {
                    "type": "openpi_entity_gpt3",
                    "entity": "steamer basket",
                    "attribute": "on the counter",
                    "change": "less likely"
                },
                {
                    "type": "openpi_entity_gpt3",
                    "entity": "saucepan",
                    "attribute": "heavier",
                    "change": "more likely"
                },
                {
                    "type": "openpi_entity_gpt3",
                    "entity": "saucepan",
                    "attribute": "lighter",
                    "change": "less likely"
                },
                {
                    "type": "openpi_entity_gpt3",
                    "entity": "steamer basket",
                    "attribute": "full",
                    "change": "more likely"
                },
                {
                    "type": "openpi_entity_gpt3",
                    "entity": "steamer basket",
                    "attribute": "empty",
                    "change": "less likely"
                },
                {
                    "type": "openpi_entity_gpt3",
                    "entity": "pan",
                    "attribute": "full",
                    "change": "more likely"
                },
                {
                    "type": "openpi_entity_gpt3",
                    "entity": "pan",
                    "attribute": "empty",
                    "change": "less likely"
                },
                {
                    "type": "openpi_entity_gpt3",
                    "entity": "saucepan",
                    "attribute": "full",
                    "change": "more likely"
                },
                {
                    "type": "openpi_entity_gpt3",
                    "entity": "saucepan",
                    "attribute": "empty",
                    "change": "less likely"
                },
                {
                    "type": "openpi_entity_gpt3",
                    "entity": "steamer basket",
                    "attribute": "heavier",
                    "change": "more likely"
                },
                {
                    "type": "openpi_entity_gpt3",
                    "entity": "steamer basket",
                    "attribute": "lighter",
                    "change": "less likely"
                },
                {
                    "type": "openpi_entity_gpt3",
                    "entity": "broccoli",
                    "attribute": "in a steamer basket",
                    "change": "more likely"
                },
                {
                    "type": "openpi_entity_gpt3",
                    "entity": "broccoli",
                    "attribute": "in a bowl",
                    "change": "less likely"
                }
            ],
            [
                {
                    "type": "step",
                    "step": "Steam the broccoli."
                },
                {
                    "type": "entity",
                    "entity": "the broccoli",
                    "attribute": "cooked",
                    "change": "more likely"
                },
                {
                    "type": "entity",
                    "entity": "the broccoli",
                    "attribute": "hot",
                    "change": "more likely"
                },
                {
                    "type": "multihop",
                    "event": "I eat the broccoli and my mouth burns.",
                    "change": "more likely"
                },
                {
                    "type": "openpi_entity_gpt3",
                    "entity": "broccoli",
                    "attribute": "hot",
                    "change": "more likely"
                },
                {
                    "type": "openpi_entity_gpt3",
                    "entity": "broccoli",
                    "attribute": "cool",
                    "change": "less likely"
                },
                {
                    "type": "openpi_entity_gpt3",
                    "entity": "broccoli",
                    "attribute": "cooked",
                    "change": "more likely"
                },
                {
                    "type": "openpi_entity_gpt3",
                    "entity": "broccoli",
                    "attribute": "raw",
                    "change": "less likely"
                },
                {
                    "type": "openpi_entity_gpt3",
                    "entity": "broccoli",
                    "attribute": "hot",
                    "change": "more likely"
                },
                {
                    "type": "openpi_entity_gpt3",
                    "entity": "broccoli",
                    "attribute": "cold",
                    "change": "less likely"
                }
            ],
            [
                {
                    "type": "step",
                    "step": "Remove it from heat."
                },
                {
                    "type": "openpi_entity_gpt3",
                    "entity": "broccoli",
                    "attribute": "cooler",
                    "change": "more likely"
                },
                {
                    "type": "openpi_entity_gpt3",
                    "entity": "broccoli",
                    "attribute": "hot",
                    "change": "less likely"
                },
                {
                    "type": "openpi_entity_gpt3",
                    "entity": "broccoli",
                    "attribute": "hotter",
                    "change": "more likely"
                },
                {
                    "type": "openpi_entity_gpt3",
                    "entity": "broccoli",
                    "attribute": "hot",
                    "change": "less likely"
                },
                {
                    "type": "openpi_entity_gpt3",
                    "entity": "broccoli",
                    "attribute": "out of the pan",
                    "change": "more likely"
                },
                {
                    "type": "openpi_entity_gpt3",
                    "entity": "broccoli",
                    "attribute": "in the pan",
                    "change": "less likely"
                },
                {
                    "type": "openpi_entity_gpt3",
                    "entity": "steamer basket",
                    "attribute": "cooler",
                    "change": "more likely"
                },
                {
                    "type": "openpi_entity_gpt3",
                    "entity": "steamer basket",
                    "attribute": "hot",
                    "change": "less likely"
                }
            ],
            [
                {
                    "type": "step",
                    "step": "Serve."
                },
                {
                    "type": "openpi_entity_gpt3",
                    "entity": "broccoli",
                    "attribute": "on a plate",
                    "change": "more likely"
                },
                {
                    "type": "openpi_entity_gpt3",
                    "entity": "broccoli",
                    "attribute": "in the basket",
                    "change": "less likely"
                },
                {
                    "type": "openpi_entity_gpt3",
                    "entity": "broccoli",
                    "attribute": "on the plate",
                    "change": "more likely"
                },
                {
                    "type": "openpi_entity_gpt3",
                    "entity": "broccoli",
                    "attribute": "in the pot",
                    "change": "less likely"
                },
                {
                    "type": "openpi_entity_gpt3",
                    "entity": "broccoli",
                    "attribute": "on a plate",
                    "change": "more likely"
                },
                {
                    "type": "openpi_entity_gpt3",
                    "entity": "broccoli",
                    "attribute": "in the steamer",
                    "change": "less likely"
                },
                {
                    "type": "openpi_entity_gpt3",
                    "entity": "broccoli",
                    "attribute": "on plate",
                    "change": "more likely"
                },
                {
                    "type": "openpi_entity_gpt3",
                    "entity": "broccoli",
                    "attribute": "in pot",
                    "change": "less likely"
                },
                {
                    "type": "openpi_entity_gpt3",
                    "entity": "broccoli",
                    "attribute": "in serving dish",
                    "change": "more likely"
                },
                {
                    "type": "openpi_entity_gpt3",
                    "entity": "broccoli",
                    "attribute": "in pot",
                    "change": "less likely"
                }
            ]
        ]
    },
    "6": {
        "goal": "Order food delivery with an app",
        "annotator": "Harry",
        "steps": [
            [
                {
                    "type": "step",
                    "step": "Start."
                }
            ],
            [
                {
                    "type": "step",
                    "step": "Choose a restaurant."
                },
                {
                    "type": "openpi_entity_gpt3",
                    "entity": "restaurant",
                    "attribute": "chosen",
                    "change": "more likely"
                },
                {
                    "type": "openpi_entity_gpt3",
                    "entity": "restaurant",
                    "attribute": "unchosen",
                    "change": "less likely"
                },
                {
                    "type": "openpi_entity_gpt3",
                    "entity": "you",
                    "attribute": "in a restaurant",
                    "change": "more likely"
                },
                {
                    "type": "openpi_entity_gpt3",
                    "entity": "you",
                    "attribute": "in the street",
                    "change": "less likely"
                },
                {
                    "type": "openpi_entity_gpt3",
                    "entity": "you",
                    "attribute": "inside restaurant",
                    "change": "more likely"
                },
                {
                    "type": "openpi_entity_gpt3",
                    "entity": "you",
                    "attribute": "outside of restaurant",
                    "change": "less likely"
                }
            ],
            [
                {
                    "type": "step",
                    "step": "Add the dishes that you want to order to the shopping cart."
                },
                {
                    "type": "openpi_entity_gpt3",
                    "entity": "dishes",
                    "attribute": "in the cart",
                    "change": "more likely"
                },
                {
                    "type": "openpi_entity_gpt3",
                    "entity": "dishes",
                    "attribute": "in the pantry",
                    "change": "less likely"
                },
                {
                    "type": "openpi_entity_gpt3",
                    "entity": "dishes",
                    "attribute": "in the shopping cart",
                    "change": "more likely"
                },
                {
                    "type": "openpi_entity_gpt3",
                    "entity": "dishes",
                    "attribute": "in the fridge",
                    "change": "less likely"
                },
                {
                    "type": "openpi_entity_gpt3",
                    "entity": "shopping cart",
                    "attribute": "in the house",
                    "change": "more likely"
                },
                {
                    "type": "openpi_entity_gpt3",
                    "entity": "shopping cart",
                    "attribute": "in the garage",
                    "change": "less likely"
                },
                {
                    "type": "openpi_entity_gpt3",
                    "entity": "dishes",
                    "attribute": "in cart",
                    "change": "more likely"
                },
                {
                    "type": "openpi_entity_gpt3",
                    "entity": "dishes",
                    "attribute": "in pantry",
                    "change": "less likely"
                },
                {
                    "type": "openpi_entity_gpt3",
                    "entity": "cart",
                    "attribute": "full",
                    "change": "more likely"
                },
                {
                    "type": "openpi_entity_gpt3",
                    "entity": "cart",
                    "attribute": "empty",
                    "change": "less likely"
                },
                {
                    "type": "openpi_entity_gpt3",
                    "entity": "dishes",
                    "attribute": "in the cart",
                    "change": "more likely"
                },
                {
                    "type": "openpi_entity_gpt3",
                    "entity": "dishes",
                    "attribute": "in the fridge",
                    "change": "less likely"
                }
            ],
            [
                {
                    "type": "step",
                    "step": "Verify your delivery address and instructions."
                },
                {
                    "type": "openpi_entity_gpt3",
                    "entity": "delivery address",
                    "attribute": "verified",
                    "change": "more likely"
                },
                {
                    "type": "openpi_entity_gpt3",
                    "entity": "delivery address",
                    "attribute": "unverified",
                    "change": "less likely"
                },
                {
                    "type": "openpi_entity_gpt3",
                    "entity": "instructions",
                    "attribute": "verified",
                    "change": "more likely"
                },
                {
                    "type": "openpi_entity_gpt3",
                    "entity": "instructions",
                    "attribute": "unverified",
                    "change": "less likely"
                },
                {
                    "type": "openpi_entity_gpt3",
                    "entity": "address",
                    "attribute": "verified",
                    "change": "more likely"
                },
                {
                    "type": "openpi_entity_gpt3",
                    "entity": "address",
                    "attribute": "unverified",
                    "change": "less likely"
                },
                {
                    "type": "openpi_entity_gpt3",
                    "entity": "driver",
                    "attribute": "at restaurant",
                    "change": "more likely"
                },
                {
                    "type": "openpi_entity_gpt3",
                    "entity": "driver",
                    "attribute": "at home",
                    "change": "less likely"
                }
            ],
            [
                {
                    "type": "step",
                    "step": "Pay."
                },
                {
                    "type": "entity",
                    "entity": "the order",
                    "attribute": "placed",
                    "change": "more likely"
                },
                {
                    "type": "multihop",
                    "event": "The restaurant knows what food to prepare for me.",
                    "change": "more likely"
                },
                {
                    "type": "openpi_entity_gpt3",
                    "entity": "payment",
                    "attribute": "verified",
                    "change": "more likely"
                },
                {
                    "type": "openpi_entity_gpt3",
                    "entity": "payment",
                    "attribute": "unverified",
                    "change": "less likely"
                },
                {
                    "type": "openpi_entity_gpt3",
                    "entity": "money",
                    "attribute": "in restaurant account",
                    "change": "more likely"
                },
                {
                    "type": "openpi_entity_gpt3",
                    "entity": "money",
                    "attribute": "in wallet",
                    "change": "less likely"
                }
            ],
            [
                {
                    "type": "step",
                    "step": "Track delivery status and call the driver if needed."
                },
                {
                    "type": "openpi_entity_gpt3",
                    "entity": "status",
                    "attribute": "verified",
                    "change": "more likely"
                },
                {
                    "type": "openpi_entity_gpt3",
                    "entity": "status",
                    "attribute": "unverified",
                    "change": "less likely"
                },
                {
                    "type": "openpi_entity_gpt3",
                    "entity": "phone",
                    "attribute": "on the table",
                    "change": "more likely"
                },
                {
                    "type": "openpi_entity_gpt3",
                    "entity": "phone",
                    "attribute": "in the pocket",
                    "change": "less likely"
                },
                {
                    "type": "openpi_entity_gpt3",
                    "entity": "phone",
                    "attribute": "on",
                    "change": "more likely"
                },
                {
                    "type": "openpi_entity_gpt3",
                    "entity": "phone",
                    "attribute": "off",
                    "change": "less likely"
                },
                {
                    "type": "openpi_entity_gpt3",
                    "entity": "phone",
                    "attribute": "on the table",
                    "change": "more likely"
                },
                {
                    "type": "openpi_entity_gpt3",
                    "entity": "phone",
                    "attribute": "in hand",
                    "change": "less likely"
                },
                {
                    "type": "openpi_entity_gpt3",
                    "entity": "phone",
                    "attribute": "on table",
                    "change": "more likely"
                },
                {
                    "type": "openpi_entity_gpt3",
                    "entity": "phone",
                    "attribute": "in hand",
                    "change": "less likely"
                },
                {
                    "type": "openpi_entity_gpt3",
                    "entity": "delivery",
                    "attribute": "verified",
                    "change": "more likely"
                },
                {
                    "type": "openpi_entity_gpt3",
                    "entity": "delivery",
                    "attribute": "unverified",
                    "change": "less likely"
                },
                {
                    "type": "openpi_entity_gpt3",
                    "entity": "phone",
                    "attribute": "in the drawer",
                    "change": "more likely"
                },
                {
                    "type": "openpi_entity_gpt3",
                    "entity": "phone",
                    "attribute": "in hand",
                    "change": "less likely"
                },
                {
                    "type": "openpi_entity_gpt3",
                    "entity": "food",
                    "attribute": "in the kitchen",
                    "change": "more likely"
                },
                {
                    "type": "openpi_entity_gpt3",
                    "entity": "food",
                    "attribute": "in the delivery",
                    "change": "less likely"
                }
            ],
            [
                {
                    "type": "step",
                    "step": "Pick up the food and enjoy. "
                },
                {
                    "type": "entity",
                    "entity": "the food",
                    "attribute": "received",
                    "change": "more likely"
                },
                {
                    "type": "multihop",
                    "event": "I start eating the food I ordered.",
                    "change": "more likely"
                },
                {
                    "type": "openpi_entity_gpt3",
                    "entity": "food",
                    "attribute": "in the car",
                    "change": "more likely"
                },
                {
                    "type": "openpi_entity_gpt3",
                    "entity": "food",
                    "attribute": "in the cart",
                    "change": "less likely"
                },
                {
                    "type": "openpi_entity_gpt3",
                    "entity": "food",
                    "attribute": "in the car",
                    "change": "more likely"
                },
                {
                    "type": "openpi_entity_gpt3",
                    "entity": "food",
                    "attribute": "in the restaurant",
                    "change": "less likely"
                },
                {
                    "type": "openpi_entity_gpt3",
                    "entity": "food",
                    "attribute": "in the hands",
                    "change": "more likely"
                },
                {
                    "type": "openpi_entity_gpt3",
                    "entity": "food",
                    "attribute": "in the cart",
                    "change": "less likely"
                }
            ]
        ]
    },
    "7": {
        "goal": "Take domestic flights",
        "annotator": "Harry",
        "steps": [
            [
                {
                    "type": "step",
                    "step": "Start."
                }
            ],
            [
                {
                    "type": "step",
                    "step": "Book a flight."
                },
                {
                    "type": "entity",
                    "entity": "your ticket",
                    "attribute": "purchased",
                    "change": "more likely"
                },
                {
                    "type": "multihop",
                    "event": "I have a ticket number for the flight.",
                    "change": "more likely"
                },
                {
                    "type": "openpi_entity_gpt3",
                    "entity": "flight",
                    "attribute": "booked",
                    "change": "more likely"
                },
                {
                    "type": "openpi_entity_gpt3",
                    "entity": "flight",
                    "attribute": "unbooked",
                    "change": "less likely"
                }
            ],
            [
                {
                    "type": "step",
                    "step": "Arrive at the airport at least 1 hour prior to boarding."
                },
                {
                    "type": "entity",
                    "entity": "I",
                    "attribute": "at the airport",
                    "change": "more likely"
                },
                {
                    "type": "multihop",
                    "event": "I pack another shirt into my suitcase.",
                    "change": "less likely"
                },
                {
                    "type": "openpi_entity_gpt3",
                    "entity": "person",
                    "attribute": "at airport",
                    "change": "more likely"
                },
                {
                    "type": "openpi_entity_gpt3",
                    "entity": "person",
                    "attribute": "at home",
                    "change": "less likely"
                },
                {
                    "type": "openpi_entity_gpt3",
                    "entity": "you",
                    "attribute": "at airport",
                    "change": "more likely"
                },
                {
                    "type": "openpi_entity_gpt3",
                    "entity": "you",
                    "attribute": "at home",
                    "change": "less likely"
                }
            ],
            [
                {
                    "type": "step",
                    "step": "Check in using the airline app or at the counter."
                },
                {
                    "type": "multihop",
                    "event": "I have my boarding pass ready.",
                    "change": "more likely"
                },
                {
                    "type": "openpi_entity_gpt3",
                    "entity": "phone",
                    "attribute": "in hand",
                    "change": "more likely"
                },
                {
                    "type": "openpi_entity_gpt3",
                    "entity": "phone",
                    "attribute": "in pocket",
                    "change": "less likely"
                },
                {
                    "type": "openpi_entity_gpt3",
                    "entity": "boarding pass",
                    "attribute": "in app",
                    "change": "more likely"
                },
                {
                    "type": "openpi_entity_gpt3",
                    "entity": "boarding pass",
                    "attribute": "in hand",
                    "change": "less likely"
                },
                {
                    "type": "openpi_entity_gpt3",
                    "entity": "app",
                    "attribute": "on the phone",
                    "change": "more likely"
                },
                {
                    "type": "openpi_entity_gpt3",
                    "entity": "app",
                    "attribute": "in the app store",
                    "change": "less likely"
                }
            ],
            [
                {
                    "type": "step",
                    "step": "Check bags if any."
                },
                {
                    "type": "openpi_entity_gpt3",
                    "entity": "bags",
                    "attribute": "checked in",
                    "change": "more likely"
                },
                {
                    "type": "openpi_entity_gpt3",
                    "entity": "bags",
                    "attribute": "in the car",
                    "change": "less likely"
                },
                {
                    "type": "openpi_entity_gpt3",
                    "entity": "bags",
                    "attribute": "in the airport",
                    "change": "more likely"
                },
                {
                    "type": "openpi_entity_gpt3",
                    "entity": "bags",
                    "attribute": "in the car",
                    "change": "less likely"
                }
            ],
            [
                {
                    "type": "step",
                    "step": "Go through airport security."
                },
                {
                    "type": "openpi_entity_gpt3",
                    "entity": "you",
                    "attribute": "through security",
                    "change": "more likely"
                },
                {
                    "type": "openpi_entity_gpt3",
                    "entity": "you",
                    "attribute": "checking bags",
                    "change": "less likely"
                },
                {
                    "type": "openpi_entity_gpt3",
                    "entity": "security checkpoint",
                    "attribute": "full",
                    "change": "more likely"
                },
                {
                    "type": "openpi_entity_gpt3",
                    "entity": "security checkpoint",
                    "attribute": "empty",
                    "change": "less likely"
                },
                {
                    "type": "openpi_entity_gpt3",
                    "entity": "bag",
                    "attribute": "checked",
                    "change": "more likely"
                },
                {
                    "type": "openpi_entity_gpt3",
                    "entity": "bag",
                    "attribute": "uncheck",
                    "change": "less likely"
                },
                {
                    "type": "openpi_entity_gpt3",
                    "entity": "security line",
                    "attribute": "full",
                    "change": "more likely"
                },
                {
                    "type": "openpi_entity_gpt3",
                    "entity": "security line",
                    "attribute": "empty",
                    "change": "less likely"
                },
                {
                    "type": "openpi_entity_gpt3",
                    "entity": "bag",
                    "attribute": "checked",
                    "change": "more likely"
                },
                {
                    "type": "openpi_entity_gpt3",
                    "entity": "bag",
                    "attribute": "unchecked",
                    "change": "less likely"
                },
                {
                    "type": "openpi_entity_gpt3",
                    "entity": "bag",
                    "attribute": "secured",
                    "change": "more likely"
                },
                {
                    "type": "openpi_entity_gpt3",
                    "entity": "bag",
                    "attribute": "unsecured",
                    "change": "less likely"
                },
                {
                    "type": "openpi_entity_gpt3",
                    "entity": "bag",
                    "attribute": "checked",
                    "change": "more likely"
                },
                {
                    "type": "openpi_entity_gpt3",
                    "entity": "bag",
                    "attribute": "unsecured",
                    "change": "less likely"
                }
            ],
            [
                {
                    "type": "step",
                    "step": "Wait at the boarding gate or walk around in the terminal."
                },
                {
                    "type": "openpi_entity_gpt3",
                    "entity": "you",
                    "attribute": "in the terminal",
                    "change": "more likely"
                },
                {
                    "type": "openpi_entity_gpt3",
                    "entity": "you",
                    "attribute": "at the gate",
                    "change": "less likely"
                },
                {
                    "type": "openpi_entity_gpt3",
                    "entity": "you",
                    "attribute": "now at the gate",
                    "change": "more likely"
                },
                {
                    "type": "openpi_entity_gpt3",
                    "entity": "you",
                    "attribute": "waiting",
                    "change": "less likely"
                },
                {
                    "type": "openpi_entity_gpt3",
                    "entity": "you",
                    "attribute": "waiting in the terminal",
                    "change": "more likely"
                },
                {
                    "type": "openpi_entity_gpt3",
                    "entity": "you",
                    "attribute": "at the gate",
                    "change": "less likely"
                }
            ],
            [
                {
                    "type": "step",
                    "step": "Board the plane when your group is called."
                },
                {
                    "type": "openpi_entity_gpt3",
                    "entity": "group",
                    "attribute": "on plane",
                    "change": "more likely"
                },
                {
                    "type": "openpi_entity_gpt3",
                    "entity": "group",
                    "attribute": "at gate",
                    "change": "less likely"
                }
            ],
            [
                {
                    "type": "step",
                    "step": "Sit through the flight after take-off."
                },
                {
                    "type": "entity",
                    "entity": "I",
                    "attribute": "at the airport",
                    "change": "less likely"
                },
                {
                    "type": "entity",
                    "entity": "I",
                    "attribute": "in the air",
                    "change": "more likely"
                },
                {
                    "type": "multihop",
                    "event": "I make a phone call.",
                    "change": "less likely"
                },
                {
                    "type": "openpi_entity_gpt3",
                    "entity": "seat",
                    "attribute": "occupied",
                    "change": "more likely"
                },
                {
                    "type": "openpi_entity_gpt3",
                    "entity": "seat",
                    "attribute": "empty",
                    "change": "less likely"
                },
                {
                    "type": "openpi_entity_gpt3",
                    "entity": "person",
                    "attribute": "sitting",
                    "change": "more likely"
                },
                {
                    "type": "openpi_entity_gpt3",
                    "entity": "person",
                    "attribute": "standing",
                    "change": "less likely"
                }
            ],
            [
                {
                    "type": "step",
                    "step": "After the plane lands, exit the plane with all carry-on items."
                },
                {
                    "type": "entity",
                    "entity": "I",
                    "attribute": "at the airport",
                    "change": "more likely"
                },
                {
                    "type": "entity",
                    "entity": "I",
                    "attribute": "in the air",
                    "change": "less likely"
                },
                {
                    "type": "multihop",
                    "event": "I make a phone call.",
                    "change": "more likely"
                },
                {
                    "type": "openpi_entity_gpt3",
                    "entity": "person",
                    "attribute": "outside the plane",
                    "change": "more likely"
                },
                {
                    "type": "openpi_entity_gpt3",
                    "entity": "person",
                    "attribute": "inside the plane",
                    "change": "less likely"
                },
                {
                    "type": "openpi_entity_gpt3",
                    "entity": "carry-on items",
                    "attribute": "outside the plane",
                    "change": "more likely"
                },
                {
                    "type": "openpi_entity_gpt3",
                    "entity": "carry-on items",
                    "attribute": "inside the plane",
                    "change": "less likely"
                }
            ],
            [
                {
                    "type": "step",
                    "step": "Exit to baggage claim."
                },
                {
                    "type": "openpi_entity_gpt3",
                    "entity": "plane",
                    "attribute": "on the ground",
                    "change": "more likely"
                },
                {
                    "type": "openpi_entity_gpt3",
                    "entity": "plane",
                    "attribute": "in the air",
                    "change": "less likely"
                },
                {
                    "type": "openpi_entity_gpt3",
                    "entity": "exit",
                    "attribute": "outside the plane",
                    "change": "more likely"
                },
                {
                    "type": "openpi_entity_gpt3",
                    "entity": "exit",
                    "attribute": "inside the plane",
                    "change": "less likely"
                },
                {
                    "type": "openpi_entity_gpt3",
                    "entity": "person",
                    "attribute": "outside the plane",
                    "change": "more likely"
                },
                {
                    "type": "openpi_entity_gpt3",
                    "entity": "person",
                    "attribute": "inside the plane",
                    "change": "less likely"
                }
            ],
            [
                {
                    "type": "step",
                    "step": "Take transportation."
                },
                {
                    "type": "entity",
                    "entity": "I",
                    "attribute": "at the airport",
                    "change": "less likely"
                },
                {
                    "type": "openpi_entity_gpt3",
                    "entity": "person",
                    "attribute": "outside the plane",
                    "change": "more likely"
                },
                {
                    "type": "openpi_entity_gpt3",
                    "entity": "person",
                    "attribute": "inside the plane",
                    "change": "less likely"
                }
            ]
        ]
    },
    "8": {
        "goal": "Stay at a hotel",
        "annotator": "Harry",
        "steps": [
            [
                {
                    "type": "step",
                    "step": "Start."
                }
            ],
            [
                {
                    "type": "step",
                    "step": "Find a suitable hotel online."
                },
                {
                    "type": "openpi_entity_gpt3",
                    "entity": "hotel",
                    "attribute": "selected",
                    "change": "more likely"
                },
                {
                    "type": "openpi_entity_gpt3",
                    "entity": "hotel",
                    "attribute": "unselected",
                    "change": "less likely"
                }
            ],
            [
                {
                    "type": "step",
                    "step": "Book a reservation by using the hotel website or calling the hotel."
                },
                {
                    "type": "entity",
                    "entity": "hotel room",
                    "attribute": "booked",
                    "change": "more likely"
                },
                {
                    "type": "multihop",
                    "event": "The hotel knows when I\u2019m arriving.",
                    "change": "more likely"
                },
                {
                    "type": "openpi_entity_gpt3",
                    "entity": "hotel reservation",
                    "attribute": "made",
                    "change": "more likely"
                },
                {
                    "type": "openpi_entity_gpt3",
                    "entity": "hotel reservation",
                    "attribute": "unmade",
                    "change": "less likely"
                },
                {
                    "type": "openpi_entity_gpt3",
                    "entity": "reservation",
                    "attribute": "made",
                    "change": "more likely"
                },
                {
                    "type": "openpi_entity_gpt3",
                    "entity": "reservation",
                    "attribute": "unmade",
                    "change": "less likely"
                }
            ],
            [
                {
                    "type": "step",
                    "step": "Arrive at the hotel."
                },
                {
                    "type": "openpi_entity_gpt3",
                    "entity": "person",
                    "attribute": "at hotel",
                    "change": "more likely"
                },
                {
                    "type": "openpi_entity_gpt3",
                    "entity": "person",
                    "attribute": "at airport",
                    "change": "less likely"
                },
                {
                    "type": "openpi_entity_gpt3",
                    "entity": "person",
                    "attribute": "at hotel",
                    "change": "more likely"
                },
                {
                    "type": "openpi_entity_gpt3",
                    "entity": "person",
                    "attribute": "at home",
                    "change": "less likely"
                },
                {
                    "type": "openpi_entity_gpt3",
                    "entity": "person",
                    "attribute": "at hotel",
                    "change": "more likely"
                },
                {
                    "type": "openpi_entity_gpt3",
                    "entity": "person",
                    "attribute": "at home",
                    "change": "less likely"
                },
                {
                    "type": "openpi_entity_gpt3",
                    "entity": "person",
                    "attribute": "at hotel",
                    "change": "more likely"
                },
                {
                    "type": "openpi_entity_gpt3",
                    "entity": "person",
                    "attribute": "on the way to hotel",
                    "change": "less likely"
                }
            ],
            [
                {
                    "type": "step",
                    "step": "Check in at the front desk and receive your room key."
                },
                {
                    "type": "entity",
                    "entity": "I",
                    "attribute": "checked in to the hotel",
                    "change": "more likely"
                },
                {
                    "type": "multihop",
                    "event": "I have a hotel room key.",
                    "change": "more likely"
                },
                {
                    "type": "openpi_entity_gpt3",
                    "entity": "key",
                    "attribute": "in the room",
                    "change": "more likely"
                },
                {
                    "type": "openpi_entity_gpt3",
                    "entity": "key",
                    "attribute": "in hand",
                    "change": "less likely"
                },
                {
                    "type": "openpi_entity_gpt3",
                    "entity": "room",
                    "attribute": "occupied",
                    "change": "more likely"
                },
                {
                    "type": "openpi_entity_gpt3",
                    "entity": "room",
                    "attribute": "unoccupied",
                    "change": "less likely"
                },
                {
                    "type": "openpi_entity_gpt3",
                    "entity": "key",
                    "attribute": "in the lock",
                    "change": "more likely"
                },
                {
                    "type": "openpi_entity_gpt3",
                    "entity": "key",
                    "attribute": "in hand",
                    "change": "less likely"
                },
                {
                    "type": "openpi_entity_gpt3",
                    "entity": "key",
                    "attribute": "in lock",
                    "change": "more likely"
                },
                {
                    "type": "openpi_entity_gpt3",
                    "entity": "key",
                    "attribute": "in hand",
                    "change": "less likely"
                },
                {
                    "type": "openpi_entity_gpt3",
                    "entity": "key",
                    "attribute": "entered",
                    "change": "more likely"
                },
                {
                    "type": "openpi_entity_gpt3",
                    "entity": "key",
                    "attribute": "unentered",
                    "change": "less likely"
                }
            ],
            [
                {
                    "type": "step",
                    "step": "Arrive at the room."
                },
                {
                    "type": "openpi_entity_gpt3",
                    "entity": "room door",
                    "attribute": "open",
                    "change": "more likely"
                },
                {
                    "type": "openpi_entity_gpt3",
                    "entity": "room door",
                    "attribute": "closed",
                    "change": "less likely"
                },
                {
                    "type": "openpi_entity_gpt3",
                    "entity": "door",
                    "attribute": "unlocked",
                    "change": "more likely"
                },
                {
                    "type": "openpi_entity_gpt3",
                    "entity": "door",
                    "attribute": "locked",
                    "change": "less likely"
                },
                {
                    "type": "openpi_entity_gpt3",
                    "entity": "room",
                    "attribute": "occupied",
                    "change": "more likely"
                },
                {
                    "type": "openpi_entity_gpt3",
                    "entity": "room",
                    "attribute": "unoccupied",
                    "change": "less likely"
                },
                {
                    "type": "openpi_entity_gpt3",
                    "entity": "key",
                    "attribute": "in the room",
                    "change": "more likely"
                },
                {
                    "type": "openpi_entity_gpt3",
                    "entity": "key",
                    "attribute": "in the hotel",
                    "change": "less likely"
                },
                {
                    "type": "openpi_entity_gpt3",
                    "entity": "person",
                    "attribute": "inside the room",
                    "change": "more likely"
                },
                {
                    "type": "openpi_entity_gpt3",
                    "entity": "person",
                    "attribute": "outside the room",
                    "change": "less likely"
                },
                {
                    "type": "openpi_entity_gpt3",
                    "entity": "door",
                    "attribute": "open",
                    "change": "more likely"
                },
                {
                    "type": "openpi_entity_gpt3",
                    "entity": "door",
                    "attribute": "closed",
                    "change": "less likely"
                },
                {
                    "type": "openpi_entity_gpt3",
                    "entity": "you",
                    "attribute": "in the room",
                    "change": "more likely"
                },
                {
                    "type": "openpi_entity_gpt3",
                    "entity": "you",
                    "attribute": "at the hotel",
                    "change": "less likely"
                },
                {
                    "type": "openpi_entity_gpt3",
                    "entity": "key",
                    "attribute": "in the lock",
                    "change": "more likely"
                },
                {
                    "type": "openpi_entity_gpt3",
                    "entity": "key",
                    "attribute": "in the pocket",
                    "change": "less likely"
                }
            ],
            [
                {
                    "type": "step",
                    "step": "Order in-room dining and use the hotel's amenities such as gym and spa."
                },
                {
                    "type": "openpi_entity_gpt3",
                    "entity": "amenities",
                    "attribute": "used",
                    "change": "more likely"
                },
                {
                    "type": "openpi_entity_gpt3",
                    "entity": "amenities",
                    "attribute": "unused",
                    "change": "less likely"
                },
                {
                    "type": "openpi_entity_gpt3",
                    "entity": "room",
                    "attribute": "occupied",
                    "change": "more likely"
                },
                {
                    "type": "openpi_entity_gpt3",
                    "entity": "room",
                    "attribute": "empty",
                    "change": "less likely"
                },
                {
                    "type": "openpi_entity_gpt3",
                    "entity": "food",
                    "attribute": "in room",
                    "change": "more likely"
                },
                {
                    "type": "openpi_entity_gpt3",
                    "entity": "food",
                    "attribute": "in kitchen",
                    "change": "less likely"
                },
                {
                    "type": "openpi_entity_gpt3",
                    "entity": "food",
                    "attribute": "delivered",
                    "change": "more likely"
                },
                {
                    "type": "openpi_entity_gpt3",
                    "entity": "food",
                    "attribute": "ordered",
                    "change": "less likely"
                }
            ],
            [
                {
                    "type": "step",
                    "step": "Check out from the hotel."
                },
                {
                    "type": "entity",
                    "entity": "you",
                    "attribute": "staying in the hotel",
                    "change": "less likely"
                },
                {
                    "type": "multihop",
                    "event": "I have a hotel room key.",
                    "change": "less likely"
                },
                {
                    "type": "openpi_entity_gpt3",
                    "entity": "key",
                    "attribute": "in pocket",
                    "change": "more likely"
                },
                {
                    "type": "openpi_entity_gpt3",
                    "entity": "key",
                    "attribute": "in hand",
                    "change": "less likely"
                },
                {
                    "type": "openpi_entity_gpt3",
                    "entity": "room",
                    "attribute": "vacated",
                    "change": "more likely"
                },
                {
                    "type": "openpi_entity_gpt3",
                    "entity": "room",
                    "attribute": "occupied",
                    "change": "less likely"
                },
                {
                    "type": "openpi_entity_gpt3",
                    "entity": "room",
                    "attribute": "vacant",
                    "change": "more likely"
                },
                {
                    "type": "openpi_entity_gpt3",
                    "entity": "room",
                    "attribute": "occupied",
                    "change": "less likely"
                },
                {
                    "type": "openpi_entity_gpt3",
                    "entity": "you",
                    "attribute": "outside the hotel",
                    "change": "more likely"
                },
                {
                    "type": "openpi_entity_gpt3",
                    "entity": "you",
                    "attribute": "in the hotel",
                    "change": "less likely"
                }
            ]
        ]
    },
    "9": {
        "goal": "Project computer screen with an HDMI cable",
        "annotator": "Harry",
        "steps": [
            [
                {
                    "type": "step",
                    "step": "Start."
                }
            ],
            [
                {
                    "type": "step",
                    "step": "Turn on the computer."
                },
                {
                    "type": "entity",
                    "entity": "computer",
                    "attribute": "powered on",
                    "change": "more likely"
                },
                {
                    "type": "multihop",
                    "event": "I adjust the display settings of the computer.",
                    "change": "more likely"
                },
                {
                    "type": "openpi_entity_gpt3",
                    "entity": "computer",
                    "attribute": "on",
                    "change": "more likely"
                },
                {
                    "type": "openpi_entity_gpt3",
                    "entity": "computer",
                    "attribute": "off",
                    "change": "less likely"
                },
                {
                    "type": "openpi_entity_gpt3",
                    "entity": "computer",
                    "attribute": "on",
                    "change": "more likely"
                },
                {
                    "type": "openpi_entity_gpt3",
                    "entity": "computer",
                    "attribute": "off",
                    "change": "less likely"
                }
            ],
            [
                {
                    "type": "step",
                    "step": "Turn on the monitor."
                },
                {
                    "type": "entity",
                    "entity": "monitor",
                    "attribute": "powered on",
                    "change": "more likely"
                },
                {
                    "type": "multihop",
                    "event": "I adjust the display settings of the monitor.",
                    "change": "more likely"
                },
                {
                    "type": "openpi_entity_gpt3",
                    "entity": "monitor",
                    "attribute": "on",
                    "change": "more likely"
                },
                {
                    "type": "openpi_entity_gpt3",
                    "entity": "monitor",
                    "attribute": "off",
                    "change": "less likely"
                },
                {
                    "type": "openpi_entity_gpt3",
                    "entity": "monitor",
                    "attribute": "turned on",
                    "change": "more likely"
                },
                {
                    "type": "openpi_entity_gpt3",
                    "entity": "monitor",
                    "attribute": "turned off",
                    "change": "less likely"
                },
                {
                    "type": "openpi_entity_gpt3",
                    "entity": "monitor",
                    "attribute": "on",
                    "change": "more likely"
                },
                {
                    "type": "openpi_entity_gpt3",
                    "entity": "monitor",
                    "attribute": "off",
                    "change": "less likely"
                },
                {
                    "type": "openpi_entity_gpt3",
                    "entity": "power",
                    "attribute": "turned on",
                    "change": "more likely"
                },
                {
                    "type": "openpi_entity_gpt3",
                    "entity": "power",
                    "attribute": "turned off",
                    "change": "less likely"
                }
            ],
            [
                {
                    "type": "step",
                    "step": "Select the correct source of the monitor."
                },
                {
                    "type": "openpi_entity_gpt3",
                    "entity": "monitor",
                    "attribute": "selected",
                    "change": "more likely"
                },
                {
                    "type": "openpi_entity_gpt3",
                    "entity": "monitor",
                    "attribute": "unselected",
                    "change": "less likely"
                },
                {
                    "type": "openpi_entity_gpt3",
                    "entity": "source",
                    "attribute": "selected",
                    "change": "more likely"
                },
                {
                    "type": "openpi_entity_gpt3",
                    "entity": "source",
                    "attribute": "unselected",
                    "change": "less likely"
                },
                {
                    "type": "openpi_entity_gpt3",
                    "entity": "source",
                    "attribute": "correct",
                    "change": "more likely"
                },
                {
                    "type": "openpi_entity_gpt3",
                    "entity": "source",
                    "attribute": "incorrect",
                    "change": "less likely"
                }
            ],
            [
                {
                    "type": "step",
                    "step": "Connect the computer and the monitor with an HDMI cable."
                },
                {
                    "type": "entity",
                    "entity": "HDMI cable",
                    "attribute": "connected in both ends",
                    "change": "more likely"
                },
                {
                    "type": "multihop",
                    "event": "The monitor projects images from the computer.",
                    "change": "more likely"
                },
                {
                    "type": "openpi_entity_gpt3",
                    "entity": "cable",
                    "attribute": "connected",
                    "change": "more likely"
                },
                {
                    "type": "openpi_entity_gpt3",
                    "entity": "cable",
                    "attribute": "unconnected",
                    "change": "less likely"
                },
                {
                    "type": "openpi_entity_gpt3",
                    "entity": "computer",
                    "attribute": "on",
                    "change": "more likely"
                },
                {
                    "type": "openpi_entity_gpt3",
                    "entity": "computer",
                    "attribute": "off",
                    "change": "less likely"
                },
                {
                    "type": "openpi_entity_gpt3",
                    "entity": "cables",
                    "attribute": "connected",
                    "change": "more likely"
                },
                {
                    "type": "openpi_entity_gpt3",
                    "entity": "cables",
                    "attribute": "unconnected",
                    "change": "less likely"
                },
                {
                    "type": "openpi_entity_gpt3",
                    "entity": "monitor",
                    "attribute": "connected",
                    "change": "more likely"
                },
                {
                    "type": "openpi_entity_gpt3",
                    "entity": "monitor",
                    "attribute": "unconnected",
                    "change": "less likely"
                },
                {
                    "type": "openpi_entity_gpt3",
                    "entity": "computer",
                    "attribute": "connected",
                    "change": "more likely"
                },
                {
                    "type": "openpi_entity_gpt3",
                    "entity": "computer",
                    "attribute": "unconnected",
                    "change": "less likely"
                }
            ],
            [
                {
                    "type": "step",
                    "step": "Adjust the projection settings on the computer."
                },
                {
                    "type": "openpi_entity_gpt3",
                    "entity": "projection settings",
                    "attribute": "adjusted",
                    "change": "more likely"
                },
                {
                    "type": "openpi_entity_gpt3",
                    "entity": "projection settings",
                    "attribute": "unadjusted",
                    "change": "less likely"
                },
                {
                    "type": "openpi_entity_gpt3",
                    "entity": "computer",
                    "attribute": "on",
                    "change": "more likely"
                },
                {
                    "type": "openpi_entity_gpt3",
                    "entity": "computer",
                    "attribute": "off",
                    "change": "less likely"
                },
                {
                    "type": "openpi_entity_gpt3",
                    "entity": "projection settings",
                    "attribute": "selected",
                    "change": "more likely"
                },
                {
                    "type": "openpi_entity_gpt3",
                    "entity": "projection settings",
                    "attribute": "unselected",
                    "change": "less likely"
                }
            ]
        ]
    },
    "10": {
        "goal": "Start a YouTube channel",
        "annotator": "Harry",
        "steps": [
            [
                {
                    "type": "step",
                    "step": "Start."
                }
            ],
            [
                {
                    "type": "step",
                    "step": "Decide on a theme and be prepared to stick to it in the long run."
                },
                {
                    "type": "openpi_entity_gpt3",
                    "entity": "theme",
                    "attribute": "selected",
                    "change": "more likely"
                },
                {
                    "type": "openpi_entity_gpt3",
                    "entity": "theme",
                    "attribute": "considered",
                    "change": "less likely"
                },
                {
                    "type": "openpi_entity_gpt3",
                    "entity": "theme",
                    "attribute": "decided",
                    "change": "more likely"
                },
                {
                    "type": "openpi_entity_gpt3",
                    "entity": "theme",
                    "attribute": "undecided",
                    "change": "less likely"
                }
            ],
            [
                {
                    "type": "step",
                    "step": "Come up with a channel name."
                },
                {
                    "type": "openpi_entity_gpt3",
                    "entity": "channel",
                    "attribute": "selected",
                    "change": "more likely"
                },
                {
                    "type": "openpi_entity_gpt3",
                    "entity": "channel",
                    "attribute": "unselected",
                    "change": "less likely"
                },
                {
                    "type": "openpi_entity_gpt3",
                    "entity": "name",
                    "attribute": "selected",
                    "change": "more likely"
                },
                {
                    "type": "openpi_entity_gpt3",
                    "entity": "name",
                    "attribute": "unselected",
                    "change": "less likely"
                },
                {
                    "type": "openpi_entity_gpt3",
                    "entity": "channel name",
                    "attribute": "selected",
                    "change": "more likely"
                },
                {
                    "type": "openpi_entity_gpt3",
                    "entity": "channel name",
                    "attribute": "unselected",
                    "change": "less likely"
                }
            ],
            [
                {
                    "type": "step",
                    "step": "Register a Google account if you don't have one."
                },
                {
                    "type": "openpi_entity_gpt3",
                    "entity": "google account",
                    "attribute": "registered",
                    "change": "more likely"
                },
                {
                    "type": "openpi_entity_gpt3",
                    "entity": "google account",
                    "attribute": "unregistered",
                    "change": "less likely"
                }
            ],
            [
                {
                    "type": "step",
                    "step": "Create your YouTube channel with your Google account. "
                },
                {
                    "type": "entity",
                    "entity": "the channel",
                    "attribute": "accessible",
                    "change": "more likely"
                },
                {
                    "type": "multihop",
                    "event": "Someone finds my video using a URL.",
                    "change": "more likely"
                },
                {
                    "type": "openpi_entity_gpt3",
                    "entity": "youtube channel",
                    "attribute": "registered",
                    "change": "more likely"
                },
                {
                    "type": "openpi_entity_gpt3",
                    "entity": "youtube channel",
                    "attribute": "unregistered",
                    "change": "less likely"
                },
                {
                    "type": "openpi_entity_gpt3",
                    "entity": "google account",
                    "attribute": "registered",
                    "change": "more likely"
                },
                {
                    "type": "openpi_entity_gpt3",
                    "entity": "google account",
                    "attribute": "unregistered",
                    "change": "less likely"
                }
            ],
            [
                {
                    "type": "step",
                    "step": "Procure a banner art and add it to your main page."
                },
                {
                    "type": "openpi_entity_gpt3",
                    "entity": "banner",
                    "attribute": "present",
                    "change": "more likely"
                },
                {
                    "type": "openpi_entity_gpt3",
                    "entity": "banner",
                    "attribute": "absent",
                    "change": "less likely"
                },
                {
                    "type": "openpi_entity_gpt3",
                    "entity": "banner",
                    "attribute": "purchased",
                    "change": "more likely"
                },
                {
                    "type": "openpi_entity_gpt3",
                    "entity": "banner",
                    "attribute": "in store",
                    "change": "less likely"
                },
                {
                    "type": "openpi_entity_gpt3",
                    "entity": "main page",
                    "attribute": "with a banner",
                    "change": "more likely"
                },
                {
                    "type": "openpi_entity_gpt3",
                    "entity": "main page",
                    "attribute": "without a banner",
                    "change": "less likely"
                },
                {
                    "type": "openpi_entity_gpt3",
                    "entity": "banner",
                    "attribute": "installed",
                    "change": "more likely"
                },
                {
                    "type": "openpi_entity_gpt3",
                    "entity": "banner",
                    "attribute": "uninstalled",
                    "change": "less likely"
                },
                {
                    "type": "openpi_entity_gpt3",
                    "entity": "banner",
                    "attribute": "purchased",
                    "change": "more likely"
                },
                {
                    "type": "openpi_entity_gpt3",
                    "entity": "banner",
                    "attribute": "absent",
                    "change": "less likely"
                }
            ],
            [
                {
                    "type": "step",
                    "step": "Upload your first video."
                },
                {
                    "type": "entity",
                    "entity": "your channel",
                    "attribute": "have a video",
                    "change": "more likely"
                },
                {
                    "type": "multihop",
                    "event": "Someone watches a video from my channel.",
                    "change": "more likely"
                },
                {
                    "type": "openpi_entity_gpt3",
                    "entity": "video",
                    "attribute": "posted",
                    "change": "more likely"
                },
                {
                    "type": "openpi_entity_gpt3",
                    "entity": "video",
                    "attribute": "unposted",
                    "change": "less likely"
                },
                {
                    "type": "openpi_entity_gpt3",
                    "entity": "video",
                    "attribute": "uploaded",
                    "change": "more likely"
                },
                {
                    "type": "openpi_entity_gpt3",
                    "entity": "video",
                    "attribute": "unposted",
                    "change": "less likely"
                },
                {
                    "type": "openpi_entity_gpt3",
                    "entity": "video",
                    "attribute": "uploaded",
                    "change": "more likely"
                },
                {
                    "type": "openpi_entity_gpt3",
                    "entity": "video",
                    "attribute": "unuploaded",
                    "change": "less likely"
                }
            ],
            [
                {
                    "type": "step",
                    "step": "Interact with comments."
                },
                {
                    "type": "openpi_entity_gpt3",
                    "entity": "comments",
                    "attribute": "read",
                    "change": "more likely"
                },
                {
                    "type": "openpi_entity_gpt3",
                    "entity": "comments",
                    "attribute": "unread",
                    "change": "less likely"
                }
            ],
            [
                {
                    "type": "step",
                    "step": "Track statistics in the Creator Studio."
                },
                {
                    "type": "openpi_entity_gpt3",
                    "entity": "statistics",
                    "attribute": "recorded",
                    "change": "more likely"
                },
                {
                    "type": "openpi_entity_gpt3",
                    "entity": "statistics",
                    "attribute": "unrecorded",
                    "change": "less likely"
                },
                {
                    "type": "openpi_entity_gpt3",
                    "entity": "statistics",
                    "attribute": "tracked",
                    "change": "more likely"
                },
                {
                    "type": "openpi_entity_gpt3",
                    "entity": "statistics",
                    "attribute": "unrecorded",
                    "change": "less likely"
                }
            ]
        ]
    },
    "11": {
        "goal": "Make tea with tea bags",
        "annotator": "Harry",
        "steps": [
            [
                {
                    "step": "Start."
                }
            ],
            [
                {
                    "type": "step",
                    "step": "Heat water to a boil with an electric kettle."
                },
                {
                    "type": "entity",
                    "entity": "water",
                    "attribute": "boiling",
                    "change": "more likely"
                },
                {
                    "type": "multihop",
                    "event": "There is a sound coming from the kettle.",
                    "change": "more likely"
                },
                {
                    "type": "openpi_entity_gpt3",
                    "entity": "kettle",
                    "attribute": "hot",
                    "change": "more likely"
                },
                {
                    "type": "openpi_entity_gpt3",
                    "entity": "kettle",
                    "attribute": "cool",
                    "change": "less likely"
                },
                {
                    "type": "openpi_entity_gpt3",
                    "entity": "water",
                    "attribute": "hot",
                    "change": "more likely"
                },
                {
                    "type": "openpi_entity_gpt3",
                    "entity": "water",
                    "attribute": "cold",
                    "change": "less likely"
                },
                {
                    "type": "openpi_entity_gpt3",
                    "entity": "water",
                    "attribute": "hotter",
                    "change": "more likely"
                },
                {
                    "type": "openpi_entity_gpt3",
                    "entity": "water",
                    "attribute": "cooler",
                    "change": "less likely"
                },
                {
                    "type": "openpi_entity_gpt3",
                    "entity": "water",
                    "attribute": "boiling",
                    "change": "more likely"
                },
                {
                    "type": "openpi_entity_gpt3",
                    "entity": "water",
                    "attribute": "cold",
                    "change": "less likely"
                },
                {
                    "type": "openpi_entity_gpt3",
                    "entity": "electric kettle",
                    "attribute": "on",
                    "change": "more likely"
                },
                {
                    "type": "openpi_entity_gpt3",
                    "entity": "electric kettle",
                    "attribute": "off",
                    "change": "less likely"
                },
                {
                    "type": "openpi_entity_gpt3",
                    "entity": "electric kettle",
                    "attribute": "hot",
                    "change": "more likely"
                },
                {
                    "type": "openpi_entity_gpt3",
                    "entity": "electric kettle",
                    "attribute": "cool",
                    "change": "less likely"
                },
                {
                    "type": "openpi_entity_gpt3",
                    "entity": "electric kettle",
                    "attribute": "on",
                    "change": "more likely"
                },
                {
                    "type": "openpi_entity_gpt3",
                    "entity": "electric kettle",
                    "attribute": "off",
                    "change": "less likely"
                },
                {
                    "type": "openpi_entity_gpt3",
                    "entity": "water",
                    "attribute": "warmer",
                    "change": "more likely"
                },
                {
                    "type": "openpi_entity_gpt3",
                    "entity": "water",
                    "attribute": "cooler",
                    "change": "less likely"
                },
                {
                    "type": "openpi_entity_gpt3",
                    "entity": "kettle",
                    "attribute": "hot",
                    "change": "more likely"
                },
                {
                    "type": "openpi_entity_gpt3",
                    "entity": "kettle",
                    "attribute": "cold",
                    "change": "less likely"
                }
            ],
            [
                {
                    "type": "step",
                    "step": "Place the tea bag in a mug."
                },
                {
                    "type": "openpi_entity_gpt3",
                    "entity": "tea bag",
                    "attribute": "in mug",
                    "change": "more likely"
                },
                {
                    "type": "openpi_entity_gpt3",
                    "entity": "tea bag",
                    "attribute": "in package",
                    "change": "less likely"
                },
                {
                    "type": "openpi_entity_gpt3",
                    "entity": "mug",
                    "attribute": "on table",
                    "change": "more likely"
                },
                {
                    "type": "openpi_entity_gpt3",
                    "entity": "mug",
                    "attribute": "in cupboard",
                    "change": "less likely"
                },
                {
                    "type": "openpi_entity_gpt3",
                    "entity": "mug",
                    "attribute": "full",
                    "change": "more likely"
                },
                {
                    "type": "openpi_entity_gpt3",
                    "entity": "mug",
                    "attribute": "empty",
                    "change": "less likely"
                }
            ],
            [
                {
                    "type": "step",
                    "step": "Carefully pour the boiling water to the mug."
                },
                {
                    "type": "entity",
                    "entity": "water",
                    "attribute": "boiling",
                    "change": "less likely"
                },
                {
                    "type": "multihop",
                    "event": "There is a sound coming from the kettle.",
                    "change": "less likely"
                },
                {
                    "type": "entity",
                    "entity": "the tea bag",
                    "attribute": "wet",
                    "change": "more likely"
                },
                {
                    "type": "multihop",
                    "event": "I put the tea bag back to its box.",
                    "change": "less likely"
                },
                {
                    "type": "entity",
                    "entity": "the mug",
                    "attribute": "containing hot water",
                    "change": "more likely"
                },
                {
                    "type": "multihop",
                    "event": "It is dangerous if the mug is knocked over.",
                    "change": "more likely"
                },
                {
                    "type": "entity",
                    "entity": "the water",
                    "attribute": "transparent",
                    "change": "less likely"
                },
                {
                    "type": "multihop",
                    "event": "The water has a taste of tea.",
                    "change": "more likely"
                },
                {
                    "type": "openpi_entity_gpt3",
                    "entity": "water",
                    "attribute": "in mug",
                    "change": "more likely"
                },
                {
                    "type": "openpi_entity_gpt3",
                    "entity": "water",
                    "attribute": "in kettle",
                    "change": "less likely"
                },
                {
                    "type": "openpi_entity_gpt3",
                    "entity": "kettle",
                    "attribute": "empty",
                    "change": "more likely"
                },
                {
                    "type": "openpi_entity_gpt3",
                    "entity": "kettle",
                    "attribute": "full",
                    "change": "less likely"
                },
                {
                    "type": "openpi_entity_gpt3",
                    "entity": "water",
                    "attribute": "cooler",
                    "change": "more likely"
                },
                {
                    "type": "openpi_entity_gpt3",
                    "entity": "water",
                    "attribute": "boiling",
                    "change": "less likely"
                },
                {
                    "type": "openpi_entity_gpt3",
                    "entity": "water",
                    "attribute": "cool",
                    "change": "more likely"
                },
                {
                    "type": "openpi_entity_gpt3",
                    "entity": "water",
                    "attribute": "boiling",
                    "change": "less likely"
                },
                {
                    "type": "openpi_entity_gpt3",
                    "entity": "tea",
                    "attribute": "hot",
                    "change": "more likely"
                },
                {
                    "type": "openpi_entity_gpt3",
                    "entity": "tea",
                    "attribute": "cool",
                    "change": "less likely"
                },
                {
                    "type": "openpi_entity_gpt3",
                    "entity": "mug",
                    "attribute": "hot",
                    "change": "more likely"
                },
                {
                    "type": "openpi_entity_gpt3",
                    "entity": "mug",
                    "attribute": "cool",
                    "change": "less likely"
                },
                {
                    "type": "openpi_entity_gpt3",
                    "entity": "mug",
                    "attribute": "hot",
                    "change": "more likely"
                },
                {
                    "type": "openpi_entity_gpt3",
                    "entity": "mug",
                    "attribute": "room temperature",
                    "change": "less likely"
                },
                {
                    "type": "openpi_entity_gpt3",
                    "entity": "water",
                    "attribute": "cooler",
                    "change": "more likely"
                },
                {
                    "type": "openpi_entity_gpt3",
                    "entity": "water",
                    "attribute": "hot",
                    "change": "less likely"
                },
                {
                    "type": "openpi_entity_gpt3",
                    "entity": "water",
                    "attribute": "cooled",
                    "change": "more likely"
                },
                {
                    "type": "openpi_entity_gpt3",
                    "entity": "water",
                    "attribute": "boiling",
                    "change": "less likely"
                }
            ],
            [
                {
                    "type": "step",
                    "step": "Drink the hot tea carefully."
                },
                {
                    "type": "openpi_entity_gpt3",
                    "entity": "tea",
                    "attribute": "in mouth",
                    "change": "more likely"
                },
                {
                    "type": "openpi_entity_gpt3",
                    "entity": "tea",
                    "attribute": "in mug",
                    "change": "less likely"
                },
                {
                    "type": "openpi_entity_gpt3",
                    "entity": "person",
                    "attribute": "cold",
                    "change": "more likely"
                },
                {
                    "type": "openpi_entity_gpt3",
                    "entity": "person",
                    "attribute": "hot",
                    "change": "less likely"
                },
                {
                    "type": "openpi_entity_gpt3",
                    "entity": "tea",
                    "attribute": "in stomach",
                    "change": "more likely"
                },
                {
                    "type": "openpi_entity_gpt3",
                    "entity": "tea",
                    "attribute": "in mug",
                    "change": "less likely"
                },
                {
                    "type": "openpi_entity_gpt3",
                    "entity": "mug",
                    "attribute": "cold",
                    "change": "more likely"
                },
                {
                    "type": "openpi_entity_gpt3",
                    "entity": "mug",
                    "attribute": "hot",
                    "change": "less likely"
                }
            ]
        ]
    },
    "12": {
        "goal": "Install a game on PS5",
        "annotator": "Harry",
        "steps": [
            [
                {
                    "step": "Start."
                }
            ],
            [
                {
                    "type": "step",
                    "step": "Go to the Playstation store"
                },
                {
                    "type": "openpi_entity_gpt3",
                    "entity": "you",
                    "attribute": "at the store",
                    "change": "more likely"
                },
                {
                    "type": "openpi_entity_gpt3",
                    "entity": "you",
                    "attribute": "elsewhere",
                    "change": "less likely"
                },
                {
                    "type": "openpi_entity_gpt3",
                    "entity": "you",
                    "attribute": "at the store",
                    "change": "more likely"
                },
                {
                    "type": "openpi_entity_gpt3",
                    "entity": "you",
                    "attribute": "at home",
                    "change": "less likely"
                },
                {
                    "type": "openpi_entity_gpt3",
                    "entity": "store",
                    "attribute": "visited",
                    "change": "more likely"
                },
                {
                    "type": "openpi_entity_gpt3",
                    "entity": "store",
                    "attribute": "unvisited",
                    "change": "less likely"
                }
            ],
            [
                {
                    "type": "step",
                    "step": "Pick a game you like"
                },
                {
                    "type": "openpi_entity_gpt3",
                    "entity": "game",
                    "attribute": "picked",
                    "change": "more likely"
                },
                {
                    "type": "openpi_entity_gpt3",
                    "entity": "game",
                    "attribute": "considered",
                    "change": "less likely"
                }
            ],
            [
                {
                    "type": "step",
                    "step": "Add the game to the cart and provide payment information"
                },
                {
                    "type": "openpi_entity_gpt3",
                    "entity": "payment information",
                    "attribute": "present",
                    "change": "more likely"
                },
                {
                    "type": "openpi_entity_gpt3",
                    "entity": "payment information",
                    "attribute": "absent",
                    "change": "less likely"
                },
                {
                    "type": "openpi_entity_gpt3",
                    "entity": "cart",
                    "attribute": "full",
                    "change": "more likely"
                },
                {
                    "type": "openpi_entity_gpt3",
                    "entity": "cart",
                    "attribute": "empty",
                    "change": "less likely"
                },
                {
                    "type": "openpi_entity_gpt3",
                    "entity": "game",
                    "attribute": "selected",
                    "change": "more likely"
                },
                {
                    "type": "openpi_entity_gpt3",
                    "entity": "game",
                    "attribute": "unselected",
                    "change": "less likely"
                },
                {
                    "type": "openpi_entity_gpt3",
                    "entity": "payment",
                    "attribute": "present",
                    "change": "more likely"
                },
                {
                    "type": "openpi_entity_gpt3",
                    "entity": "payment",
                    "attribute": "absent",
                    "change": "less likely"
                }
            ],
            [
                {
                    "type": "step",
                    "step": "Finish the purchase."
                },
                {
                    "type": "entity",
                    "entity": "game",
                    "attribute": "bought",
                    "change": "more likely"
                },
                {
                    "type": "multihop",
                    "event": "I can download and play the game.",
                    "change": "more likely"
                },
                {
                    "type": "openpi_entity_gpt3",
                    "entity": "purchase",
                    "attribute": "complete",
                    "change": "more likely"
                },
                {
                    "type": "openpi_entity_gpt3",
                    "entity": "purchase",
                    "attribute": "incomplete",
                    "change": "less likely"
                },
                {
                    "type": "openpi_entity_gpt3",
                    "entity": "game",
                    "attribute": "installed",
                    "change": "more likely"
                },
                {
                    "type": "openpi_entity_gpt3",
                    "entity": "game",
                    "attribute": "uninstalled",
                    "change": "less likely"
                }
            ],
            [
                {
                    "type": "step",
                    "step": "Download and launch the game to start playing. "
                },
                {
                    "type": "entity",
                    "entity": "the game",
                    "attribute": "installed",
                    "change": "more likely"
                },
                {
                    "type": "multihop",
                    "event": "I run the game.",
                    "change": "more likely"
                },
                {
                    "type": "openpi_entity_gpt3",
                    "entity": "game",
                    "attribute": "launched",
                    "change": "more likely"
                },
                {
                    "type": "openpi_entity_gpt3",
                    "entity": "game",
                    "attribute": "unlaunched",
                    "change": "less likely"
                },
                {
                    "type": "openpi_entity_gpt3",
                    "entity": "game",
                    "attribute": "downloaded",
                    "change": "more likely"
                },
                {
                    "type": "openpi_entity_gpt3",
                    "entity": "game",
                    "attribute": "uninstalled",
                    "change": "less likely"
                },
                {
                    "type": "openpi_entity_gpt3",
                    "entity": "game",
                    "attribute": "installed",
                    "change": "more likely"
                },
                {
                    "type": "openpi_entity_gpt3",
                    "entity": "game",
                    "attribute": "uninstalled",
                    "change": "less likely"
                },
                {
                    "type": "openpi_entity_gpt3",
                    "entity": "download",
                    "attribute": "complete",
                    "change": "more likely"
                },
                {
                    "type": "openpi_entity_gpt3",
                    "entity": "download",
                    "attribute": "incomplete",
                    "change": "less likely"
                }
            ]
        ]
    },
    "13": {
        "goal": "Schedule a virtual meeting",
        "annotator": "Harry",
        "steps": [
            [
                {
                    "step": "Start."
                }
            ],
            [
                {
                    "type": "step",
                    "step": "Decide on a topic and a list of meeting attendees."
                },
                {
                    "type": "openpi_entity_gpt3",
                    "entity": "meeting",
                    "attribute": "selected",
                    "change": "more likely"
                },
                {
                    "type": "openpi_entity_gpt3",
                    "entity": "meeting",
                    "attribute": "unselected",
                    "change": "less likely"
                },
                {
                    "type": "openpi_entity_gpt3",
                    "entity": "meeting attendees",
                    "attribute": "selected",
                    "change": "more likely"
                },
                {
                    "type": "openpi_entity_gpt3",
                    "entity": "meeting attendees",
                    "attribute": "unselected",
                    "change": "less likely"
                }
            ],
            [
                {
                    "type": "step",
                    "step": "Reach out to the attendees to find a time that works."
                },
                {
                    "type": "entity",
                    "entity": "the attendees",
                    "attribute": "been notified of the meeting",
                    "change": "more likely"
                },
                {
                    "type": "multihop",
                    "event": "I expect that some people will show up.",
                    "change": "more likely"
                },
                {
                    "type": "openpi_entity_gpt3",
                    "entity": "time",
                    "attribute": "selected",
                    "change": "more likely"
                },
                {
                    "type": "openpi_entity_gpt3",
                    "entity": "time",
                    "attribute": "unselected",
                    "change": "less likely"
                },
                {
                    "type": "openpi_entity_gpt3",
                    "entity": "attendees",
                    "attribute": "measured",
                    "change": "more likely"
                },
                {
                    "type": "openpi_entity_gpt3",
                    "entity": "attendees",
                    "attribute": "unmeasured",
                    "change": "less likely"
                },
                {
                    "type": "openpi_entity_gpt3",
                    "entity": "attendees",
                    "attribute": "invited",
                    "change": "more likely"
                },
                {
                    "type": "openpi_entity_gpt3",
                    "entity": "attendees",
                    "attribute": "uninvited",
                    "change": "less likely"
                }
            ],
            [
                {
                    "type": "step",
                    "step": "Choose a virtual meeting application such as Zoom and schedule a meeting."
                },
                {
                    "type": "openpi_entity_gpt3",
                    "entity": "zoom",
                    "attribute": "selected",
                    "change": "more likely"
                },
                {
                    "type": "openpi_entity_gpt3",
                    "entity": "zoom",
                    "attribute": "unselected",
                    "change": "less likely"
                },
                {
                    "type": "openpi_entity_gpt3",
                    "entity": "application",
                    "attribute": "selected",
                    "change": "more likely"
                },
                {
                    "type": "openpi_entity_gpt3",
                    "entity": "application",
                    "attribute": "unselected",
                    "change": "less likely"
                },
                {
                    "type": "openpi_entity_gpt3",
                    "entity": "meeting",
                    "attribute": "scheduled",
                    "change": "more likely"
                },
                {
                    "type": "openpi_entity_gpt3",
                    "entity": "meeting",
                    "attribute": "unplanned",
                    "change": "less likely"
                }
            ],
            [
                {
                    "type": "step",
                    "step": "Send the meeting information to everyone."
                },
                {
                    "type": "openpi_entity_gpt3",
                    "entity": "email",
                    "attribute": "opened",
                    "change": "more likely"
                },
                {
                    "type": "openpi_entity_gpt3",
                    "entity": "email",
                    "attribute": "unopened",
                    "change": "less likely"
                },
                {
                    "type": "openpi_entity_gpt3",
                    "entity": "meeting",
                    "attribute": "scheduled",
                    "change": "more likely"
                },
                {
                    "type": "openpi_entity_gpt3",
                    "entity": "meeting",
                    "attribute": "unplanned",
                    "change": "less likely"
                },
                {
                    "type": "openpi_entity_gpt3",
                    "entity": "meeting information",
                    "attribute": "sent to everyone",
                    "change": "more likely"
                },
                {
                    "type": "openpi_entity_gpt3",
                    "entity": "meeting information",
                    "attribute": "in one place",
                    "change": "less likely"
                },
                {
                    "type": "openpi_entity_gpt3",
                    "entity": "meeting",
                    "attribute": "confirmed",
                    "change": "more likely"
                },
                {
                    "type": "openpi_entity_gpt3",
                    "entity": "meeting",
                    "attribute": "unconfirmed",
                    "change": "less likely"
                }
            ],
            [
                {
                    "type": "step",
                    "step": "Send a reminder before the meeting."
                },
                {
                    "type": "openpi_entity_gpt3",
                    "entity": "reminder",
                    "attribute": "sent",
                    "change": "more likely"
                },
                {
                    "type": "openpi_entity_gpt3",
                    "entity": "reminder",
                    "attribute": "unmailed",
                    "change": "less likely"
                },
                {
                    "type": "openpi_entity_gpt3",
                    "entity": "meeting",
                    "attribute": "scheduled",
                    "change": "more likely"
                },
                {
                    "type": "openpi_entity_gpt3",
                    "entity": "meeting",
                    "attribute": "unscheduled",
                    "change": "less likely"
                }
            ],
            [
                {
                    "type": "step",
                    "step": "Start meeting."
                },
                {
                    "type": "entity",
                    "entity": "the meeting",
                    "attribute": "started",
                    "change": "more likely"
                },
                {
                    "type": "multihop",
                    "event": "I cancel the meeting.",
                    "change": "less likely"
                },
                {
                    "type": "openpi_entity_gpt3",
                    "entity": "meeting",
                    "attribute": "started",
                    "change": "more likely"
                },
                {
                    "type": "openpi_entity_gpt3",
                    "entity": "meeting",
                    "attribute": "unstarted",
                    "change": "less likely"
                },
                {
                    "type": "openpi_entity_gpt3",
                    "entity": "the meeting",
                    "attribute": "started",
                    "change": "more likely"
                },
                {
                    "type": "openpi_entity_gpt3",
                    "entity": "the meeting",
                    "attribute": "unstarted",
                    "change": "less likely"
                }
            ]
        ]
    },
    "14": {
        "goal": "Make scrambled eggs",
        "annotator": "Harry",
        "steps": [
            [
                {
                    "step": "Start."
                }
            ],
            [
                {
                    "type": "step",
                    "step": "Pre-heat the pan with medium to high heat."
                },
                {
                    "type": "entity",
                    "entity": "the pan",
                    "attribute": "hot",
                    "change": "more likely"
                },
                {
                    "type": "multihop",
                    "event": "I touch the pan surface and get injured.",
                    "change": "more likely"
                },
                {
                    "type": "openpi_entity_gpt3",
                    "entity": "pan",
                    "attribute": "hot",
                    "change": "more likely"
                },
                {
                    "type": "openpi_entity_gpt3",
                    "entity": "pan",
                    "attribute": "cold",
                    "change": "less likely"
                },
                {
                    "type": "openpi_entity_gpt3",
                    "entity": "stove",
                    "attribute": "hot",
                    "change": "more likely"
                },
                {
                    "type": "openpi_entity_gpt3",
                    "entity": "stove",
                    "attribute": "cold",
                    "change": "less likely"
                },
                {
                    "type": "openpi_entity_gpt3",
                    "entity": "pan",
                    "attribute": "hot",
                    "change": "more likely"
                },
                {
                    "type": "openpi_entity_gpt3",
                    "entity": "pan",
                    "attribute": "cool",
                    "change": "less likely"
                }
            ],
            [
                {
                    "type": "step",
                    "step": "Crack some eggs into a mixing bowl."
                },
                {
                    "type": "openpi_entity_gpt3",
                    "entity": "eggs",
                    "attribute": "in a bowl",
                    "change": "more likely"
                },
                {
                    "type": "openpi_entity_gpt3",
                    "entity": "eggs",
                    "attribute": "in a container",
                    "change": "less likely"
                },
                {
                    "type": "openpi_entity_gpt3",
                    "entity": "eggs",
                    "attribute": "in the bowl",
                    "change": "more likely"
                },
                {
                    "type": "openpi_entity_gpt3",
                    "entity": "eggs",
                    "attribute": "in the fridge",
                    "change": "less likely"
                },
                {
                    "type": "openpi_entity_gpt3",
                    "entity": "eggs",
                    "attribute": "cracked",
                    "change": "more likely"
                },
                {
                    "type": "openpi_entity_gpt3",
                    "entity": "eggs",
                    "attribute": "whole",
                    "change": "less likely"
                },
                {
                    "type": "openpi_entity_gpt3",
                    "entity": "eggs",
                    "attribute": "in mixing bowl",
                    "change": "more likely"
                },
                {
                    "type": "openpi_entity_gpt3",
                    "entity": "eggs",
                    "attribute": "in fridge",
                    "change": "less likely"
                },
                {
                    "type": "openpi_entity_gpt3",
                    "entity": "bowl",
                    "attribute": "dirty",
                    "change": "more likely"
                },
                {
                    "type": "openpi_entity_gpt3",
                    "entity": "bowl",
                    "attribute": "clean",
                    "change": "less likely"
                },
                {
                    "type": "openpi_entity_gpt3",
                    "entity": "mixing bowl",
                    "attribute": "dirty",
                    "change": "more likely"
                },
                {
                    "type": "openpi_entity_gpt3",
                    "entity": "mixing bowl",
                    "attribute": "clean",
                    "change": "less likely"
                },
                {
                    "type": "openpi_entity_gpt3",
                    "entity": "eggs",
                    "attribute": "cracked",
                    "change": "more likely"
                },
                {
                    "type": "openpi_entity_gpt3",
                    "entity": "eggs",
                    "attribute": "whole",
                    "change": "less likely"
                }
            ],
            [
                {
                    "type": "step",
                    "step": "Whisk the eggs until the mixture has a consistent color. "
                },
                {
                    "type": "openpi_entity_gpt3",
                    "entity": "mixture",
                    "attribute": "smooth",
                    "change": "more likely"
                },
                {
                    "type": "openpi_entity_gpt3",
                    "entity": "mixture",
                    "attribute": "lumpy",
                    "change": "less likely"
                },
                {
                    "type": "openpi_entity_gpt3",
                    "entity": "whisk",
                    "attribute": "dirty",
                    "change": "more likely"
                },
                {
                    "type": "openpi_entity_gpt3",
                    "entity": "whisk",
                    "attribute": "clean",
                    "change": "less likely"
                },
                {
                    "type": "openpi_entity_gpt3",
                    "entity": "mixture",
                    "attribute": "smooth",
                    "change": "more likely"
                },
                {
                    "type": "openpi_entity_gpt3",
                    "entity": "mixture",
                    "attribute": "lumpy",
                    "change": "less likely"
                },
                {
                    "type": "openpi_entity_gpt3",
                    "entity": "eggs",
                    "attribute": "cracked",
                    "change": "more likely"
                },
                {
                    "type": "openpi_entity_gpt3",
                    "entity": "eggs",
                    "attribute": "whole",
                    "change": "less likely"
                },
                {
                    "type": "openpi_entity_gpt3",
                    "entity": "whisk",
                    "attribute": "in the bowl",
                    "change": "more likely"
                },
                {
                    "type": "openpi_entity_gpt3",
                    "entity": "whisk",
                    "attribute": "in the cupboard",
                    "change": "less likely"
                },
                {
                    "type": "openpi_entity_gpt3",
                    "entity": "mixture",
                    "attribute": "whisked",
                    "change": "more likely"
                },
                {
                    "type": "openpi_entity_gpt3",
                    "entity": "mixture",
                    "attribute": "lumpy",
                    "change": "less likely"
                },
                {
                    "type": "openpi_entity_gpt3",
                    "entity": "mixture",
                    "attribute": "darker",
                    "change": "more likely"
                },
                {
                    "type": "openpi_entity_gpt3",
                    "entity": "mixture",
                    "attribute": "light",
                    "change": "less likely"
                },
                {
                    "type": "openpi_entity_gpt3",
                    "entity": "eggs",
                    "attribute": "cracked",
                    "change": "more likely"
                },
                {
                    "type": "openpi_entity_gpt3",
                    "entity": "eggs",
                    "attribute": "whole",
                    "change": "less likely"
                }
            ],
            [
                {
                    "type": "step",
                    "step": "Add oil to the pan."
                },
                {
                    "type": "entity",
                    "entity": "the pan",
                    "attribute": "clean",
                    "change": "less likely"
                },
                {
                    "type": "multihop",
                    "event": "My hands get greasy if I touch the pan.",
                    "change": "more likely"
                },
                {
                    "type": "openpi_entity_gpt3",
                    "entity": "oil",
                    "attribute": "in pan",
                    "change": "more likely"
                },
                {
                    "type": "openpi_entity_gpt3",
                    "entity": "oil",
                    "attribute": "in bottle",
                    "change": "less likely"
                },
                {
                    "type": "openpi_entity_gpt3",
                    "entity": "oil",
                    "attribute": "in bowl",
                    "change": "more likely"
                },
                {
                    "type": "openpi_entity_gpt3",
                    "entity": "oil",
                    "attribute": "in bottle",
                    "change": "less likely"
                },
                {
                    "type": "openpi_entity_gpt3",
                    "entity": "oil",
                    "attribute": "in mixing bowl",
                    "change": "more likely"
                },
                {
                    "type": "openpi_entity_gpt3",
                    "entity": "oil",
                    "attribute": "in bottle",
                    "change": "less likely"
                }
            ],
            [
                {
                    "type": "step",
                    "step": "Add the eggs to the pan."
                },
                {
                    "type": "entity",
                    "entity": "the eggs",
                    "attribute": "in the hot pan",
                    "change": "more likely"
                },
                {
                    "type": "multihop",
                    "event": "The eggs solidify.",
                    "change": "more likely"
                },
                {
                    "type": "openpi_entity_gpt3",
                    "entity": "oil",
                    "attribute": "in pan",
                    "change": "more likely"
                },
                {
                    "type": "openpi_entity_gpt3",
                    "entity": "oil",
                    "attribute": "in bottle",
                    "change": "less likely"
                },
                {
                    "type": "openpi_entity_gpt3",
                    "entity": "eggs",
                    "attribute": "in pan",
                    "change": "more likely"
                },
                {
                    "type": "openpi_entity_gpt3",
                    "entity": "eggs",
                    "attribute": "in bowl",
                    "change": "less likely"
                },
                {
                    "type": "openpi_entity_gpt3",
                    "entity": "eggs",
                    "attribute": "in the pan",
                    "change": "more likely"
                },
                {
                    "type": "openpi_entity_gpt3",
                    "entity": "eggs",
                    "attribute": "in a bowl",
                    "change": "less likely"
                }
            ],
            [
                {
                    "type": "step",
                    "step": "Stir gently and frequently to separate the eggs."
                },
                {
                    "type": "multihop",
                    "event": "The eggs solidify.",
                    "change": "more likely"
                },
                {
                    "type": "openpi_entity_gpt3",
                    "entity": "mixture",
                    "attribute": "smooth",
                    "change": "more likely"
                },
                {
                    "type": "openpi_entity_gpt3",
                    "entity": "mixture",
                    "attribute": "lumpy",
                    "change": "less likely"
                },
                {
                    "type": "openpi_entity_gpt3",
                    "entity": "oil",
                    "attribute": "hot",
                    "change": "more likely"
                },
                {
                    "type": "openpi_entity_gpt3",
                    "entity": "oil",
                    "attribute": "cool",
                    "change": "less likely"
                },
                {
                    "type": "openpi_entity_gpt3",
                    "entity": "eggs",
                    "attribute": "in the pan",
                    "change": "more likely"
                },
                {
                    "type": "openpi_entity_gpt3",
                    "entity": "eggs",
                    "attribute": "in the bowl",
                    "change": "less likely"
                },
                {
                    "type": "openpi_entity_gpt3",
                    "entity": "mixture",
                    "attribute": "scrambled",
                    "change": "more likely"
                },
                {
                    "type": "openpi_entity_gpt3",
                    "entity": "mixture",
                    "attribute": "smooth",
                    "change": "less likely"
                },
                {
                    "type": "openpi_entity_gpt3",
                    "entity": "eggs",
                    "attribute": "hot",
                    "change": "more likely"
                },
                {
                    "type": "openpi_entity_gpt3",
                    "entity": "eggs",
                    "attribute": "cold",
                    "change": "less likely"
                },
                {
                    "type": "openpi_entity_gpt3",
                    "entity": "pan",
                    "attribute": "hot",
                    "change": "more likely"
                },
                {
                    "type": "openpi_entity_gpt3",
                    "entity": "pan",
                    "attribute": "cool",
                    "change": "less likely"
                },
                {
                    "type": "openpi_entity_gpt3",
                    "entity": "eggs",
                    "attribute": "soft",
                    "change": "more likely"
                },
                {
                    "type": "openpi_entity_gpt3",
                    "entity": "eggs",
                    "attribute": "hard",
                    "change": "less likely"
                }
            ],
            [
                {
                    "type": "step",
                    "step": "Turn off the heat and serve the eggs."
                },
                {
                    "type": "entity",
                    "entity": "the eggs",
                    "attribute": "in the pan",
                    "change": "less likely"
                },
                {
                    "type": "multihop",
                    "event": "I start eating the eggs.",
                    "change": "more likely"
                },
                {
                    "type": "openpi_entity_gpt3",
                    "entity": "stove",
                    "attribute": "cool",
                    "change": "more likely"
                },
                {
                    "type": "openpi_entity_gpt3",
                    "entity": "stove",
                    "attribute": "hot",
                    "change": "less likely"
                },
                {
                    "type": "openpi_entity_gpt3",
                    "entity": "pan",
                    "attribute": "cool",
                    "change": "more likely"
                },
                {
                    "type": "openpi_entity_gpt3",
                    "entity": "pan",
                    "attribute": "hot",
                    "change": "less likely"
                },
                {
                    "type": "openpi_entity_gpt3",
                    "entity": "eggs",
                    "attribute": "cool",
                    "change": "more likely"
                },
                {
                    "type": "openpi_entity_gpt3",
                    "entity": "eggs",
                    "attribute": "hot",
                    "change": "less likely"
                },
                {
                    "type": "openpi_entity_gpt3",
                    "entity": "eggs",
                    "attribute": "cold",
                    "change": "more likely"
                },
                {
                    "type": "openpi_entity_gpt3",
                    "entity": "eggs",
                    "attribute": "hot",
                    "change": "less likely"
                }
            ]
        ]
    },
    "15": {
        "goal": "Eat at a restaurant in the US",
        "annotator": "Harry",
        "steps": [
            [
                {
                    "step": "Start"
                }
            ],
            [
                {
                    "type": "step",
                    "step": "Arrive at the resturant."
                },
                {
                    "type": "openpi_entity_gpt3",
                    "entity": "you",
                    "attribute": "at resturant",
                    "change": "more likely"
                },
                {
                    "type": "openpi_entity_gpt3",
                    "entity": "you",
                    "attribute": "at home",
                    "change": "less likely"
                }
            ],
            [
                {
                    "type": "step",
                    "step": "Let the host know the size of your party and follow them to the table."
                },
                {
                    "type": "openpi_entity_gpt3",
                    "entity": "you",
                    "attribute": "at table",
                    "change": "more likely"
                },
                {
                    "type": "openpi_entity_gpt3",
                    "entity": "you",
                    "attribute": "at resturant",
                    "change": "less likely"
                },
                {
                    "type": "openpi_entity_gpt3",
                    "entity": "host",
                    "attribute": "at door",
                    "change": "more likely"
                },
                {
                    "type": "openpi_entity_gpt3",
                    "entity": "host",
                    "attribute": "at table",
                    "change": "less likely"
                }
            ],
            [
                {
                    "type": "step",
                    "step": "Order food and drinks."
                },
                {
                    "type": "entity",
                    "entity": "order",
                    "attribute": "placed",
                    "change": "more likely"
                },
                {
                    "type": "multihop",
                    "event": "I go home.",
                    "change": "less likely"
                },
                {
                    "type": "openpi_entity_gpt3",
                    "entity": "drinks",
                    "attribute": "on the table",
                    "change": "more likely"
                },
                {
                    "type": "openpi_entity_gpt3",
                    "entity": "drinks",
                    "attribute": "in the fridge",
                    "change": "less likely"
                },
                {
                    "type": "openpi_entity_gpt3",
                    "entity": "drinks",
                    "attribute": "on table",
                    "change": "more likely"
                },
                {
                    "type": "openpi_entity_gpt3",
                    "entity": "drinks",
                    "attribute": "in fridge",
                    "change": "less likely"
                },
                {
                    "type": "openpi_entity_gpt3",
                    "entity": "food",
                    "attribute": "on the table",
                    "change": "more likely"
                },
                {
                    "type": "openpi_entity_gpt3",
                    "entity": "food",
                    "attribute": "in the kitchen",
                    "change": "less likely"
                },
                {
                    "type": "openpi_entity_gpt3",
                    "entity": "food",
                    "attribute": "on table",
                    "change": "more likely"
                },
                {
                    "type": "openpi_entity_gpt3",
                    "entity": "food",
                    "attribute": "in kitchen",
                    "change": "less likely"
                }
            ],
            [
                {
                    "type": "step",
                    "step": "Enjoy the food brought to the table."
                },
                {
                    "type": "entity",
                    "entity": "food",
                    "attribute": "on the table",
                    "change": "more likely"
                },
                {
                    "type": "multihop",
                    "event": "I eat.",
                    "change": "more likely"
                },
                {
                    "type": "openpi_entity_gpt3",
                    "entity": "food",
                    "attribute": "in the stomach",
                    "change": "more likely"
                },
                {
                    "type": "openpi_entity_gpt3",
                    "entity": "food",
                    "attribute": "on the table",
                    "change": "less likely"
                },
                {
                    "type": "openpi_entity_gpt3",
                    "entity": "stomach",
                    "attribute": "full",
                    "change": "more likely"
                },
                {
                    "type": "openpi_entity_gpt3",
                    "entity": "stomach",
                    "attribute": "empty",
                    "change": "less likely"
                },
                {
                    "type": "openpi_entity_gpt3",
                    "entity": "food",
                    "attribute": "in the stomach",
                    "change": "more likely"
                },
                {
                    "type": "openpi_entity_gpt3",
                    "entity": "food",
                    "attribute": "on the plate",
                    "change": "less likely"
                }
            ],
            [
                {
                    "type": "step",
                    "step": "Ask for the check when you're finished."
                },
                {
                    "type": "multihop",
                    "event": "I eat.",
                    "change": "less likely"
                },
                {
                    "type": "openpi_entity_gpt3",
                    "entity": "you",
                    "attribute": "finished",
                    "change": "more likely"
                },
                {
                    "type": "openpi_entity_gpt3",
                    "entity": "you",
                    "attribute": "needing the check",
                    "change": "less likely"
                },
                {
                    "type": "openpi_entity_gpt3",
                    "entity": "person",
                    "attribute": "served",
                    "change": "more likely"
                },
                {
                    "type": "openpi_entity_gpt3",
                    "entity": "person",
                    "attribute": "waiting",
                    "change": "less likely"
                },
                {
                    "type": "openpi_entity_gpt3",
                    "entity": "money",
                    "attribute": "in check",
                    "change": "more likely"
                },
                {
                    "type": "openpi_entity_gpt3",
                    "entity": "money",
                    "attribute": "in hand",
                    "change": "less likely"
                },
                {
                    "type": "openpi_entity_gpt3",
                    "entity": "bill",
                    "attribute": "present",
                    "change": "more likely"
                },
                {
                    "type": "openpi_entity_gpt3",
                    "entity": "bill",
                    "attribute": "absent",
                    "change": "less likely"
                },
                {
                    "type": "openpi_entity_gpt3",
                    "entity": "check",
                    "attribute": "present",
                    "change": "more likely"
                },
                {
                    "type": "openpi_entity_gpt3",
                    "entity": "check",
                    "attribute": "absent",
                    "change": "less likely"
                }
            ],
            [
                {
                    "type": "step",
                    "step": "Have the waiter clear off the table. "
                },
                {
                    "type": "entity",
                    "entity": "food",
                    "attribute": "on the table",
                    "change": "less likely"
                },
                {
                    "type": "multihop",
                    "event": "I eat.",
                    "change": "less likely"
                },
                {
                    "type": "openpi_entity_gpt3",
                    "entity": "table",
                    "attribute": "empty",
                    "change": "more likely"
                },
                {
                    "type": "openpi_entity_gpt3",
                    "entity": "table",
                    "attribute": "occupied",
                    "change": "less likely"
                },
                {
                    "type": "openpi_entity_gpt3",
                    "entity": "table",
                    "attribute": "cleared",
                    "change": "more likely"
                },
                {
                    "type": "openpi_entity_gpt3",
                    "entity": "table",
                    "attribute": "full",
                    "change": "less likely"
                },
                {
                    "type": "openpi_entity_gpt3",
                    "entity": "table",
                    "attribute": "empty",
                    "change": "more likely"
                },
                {
                    "type": "openpi_entity_gpt3",
                    "entity": "table",
                    "attribute": "full",
                    "change": "less likely"
                },
                {
                    "type": "openpi_entity_gpt3",
                    "entity": "table",
                    "attribute": "empty",
                    "change": "more likely"
                },
                {
                    "type": "openpi_entity_gpt3",
                    "entity": "table",
                    "attribute": "occupied",
                    "change": "less likely"
                },
                {
                    "type": "openpi_entity_gpt3",
                    "entity": "table",
                    "attribute": "cleared",
                    "change": "more likely"
                },
                {
                    "type": "openpi_entity_gpt3",
                    "entity": "table",
                    "attribute": "full",
                    "change": "less likely"
                },
                {
                    "type": "openpi_entity_gpt3",
                    "entity": "waiter",
                    "attribute": "on the table",
                    "change": "more likely"
                },
                {
                    "type": "openpi_entity_gpt3",
                    "entity": "waiter",
                    "attribute": "in the kitchen",
                    "change": "less likely"
                }
            ],
            [
                {
                    "type": "step",
                    "step": "Pay by cash or credit card."
                },
                {
                    "type": "entity",
                    "entity": "the check",
                    "attribute": "paid",
                    "change": "more likely"
                },
                {
                    "type": "multihop",
                    "event": "I go home.",
                    "change": "more likely"
                },
                {
                    "type": "openpi_entity_gpt3",
                    "entity": "cash",
                    "attribute": "in hand",
                    "change": "more likely"
                },
                {
                    "type": "openpi_entity_gpt3",
                    "entity": "cash",
                    "attribute": "in wallet",
                    "change": "less likely"
                },
                {
                    "type": "openpi_entity_gpt3",
                    "entity": "credit card",
                    "attribute": "activated",
                    "change": "more likely"
                },
                {
                    "type": "openpi_entity_gpt3",
                    "entity": "credit card",
                    "attribute": "unactivated",
                    "change": "less likely"
                },
                {
                    "type": "openpi_entity_gpt3",
                    "entity": "payment",
                    "attribute": "paid",
                    "change": "more likely"
                },
                {
                    "type": "openpi_entity_gpt3",
                    "entity": "payment",
                    "attribute": "unpaid",
                    "change": "less likely"
                },
                {
                    "type": "openpi_entity_gpt3",
                    "entity": "cash",
                    "attribute": "in hand",
                    "change": "more likely"
                },
                {
                    "type": "openpi_entity_gpt3",
                    "entity": "cash",
                    "attribute": "in wallet",
                    "change": "less likely"
                },
                {
                    "type": "openpi_entity_gpt3",
                    "entity": "credit card",
                    "attribute": "in hand",
                    "change": "more likely"
                },
                {
                    "type": "openpi_entity_gpt3",
                    "entity": "credit card",
                    "attribute": "in wallet",
                    "change": "less likely"
                },
                {
                    "type": "openpi_entity_gpt3",
                    "entity": "credit card",
                    "attribute": "used",
                    "change": "more likely"
                },
                {
                    "type": "openpi_entity_gpt3",
                    "entity": "credit card",
                    "attribute": "unactivated",
                    "change": "less likely"
                },
                {
                    "type": "openpi_entity_gpt3",
                    "entity": "credit card",
                    "attribute": "used",
                    "change": "more likely"
                },
                {
                    "type": "openpi_entity_gpt3",
                    "entity": "credit card",
                    "attribute": "unused",
                    "change": "less likely"
                }
            ],
            [
                {
                    "type": "step",
                    "step": "Leave the restaurant."
                },
                {
                    "type": "openpi_entity_gpt3",
                    "entity": "you",
                    "attribute": "outside",
                    "change": "more likely"
                },
                {
                    "type": "openpi_entity_gpt3",
                    "entity": "you",
                    "attribute": "at the restaurant",
                    "change": "less likely"
                }
            ]
        ]
    },
    "16": {
        "goal": "Wash Fruit and Vegetables",
        "annotator": "Shuyan",
        "steps": [
            [
                {
                    "step": "Start"
                }
            ],
            [
                {
                    "type": "step",
                    "step": "Prepare produce for washing"
                },
                {
                    "type": "openpi_entity_gpt3",
                    "entity": "produce",
                    "attribute": "in sink",
                    "change": "more likely"
                },
                {
                    "type": "openpi_entity_gpt3",
                    "entity": "produce",
                    "attribute": "on counter",
                    "change": "less likely"
                },
                {
                    "type": "openpi_entity_gpt3",
                    "entity": "sink",
                    "attribute": "full",
                    "change": "more likely"
                },
                {
                    "type": "openpi_entity_gpt3",
                    "entity": "sink",
                    "attribute": "empty",
                    "change": "less likely"
                },
                {
                    "type": "openpi_entity_gpt3",
                    "entity": "produce",
                    "attribute": "in the sink",
                    "change": "more likely"
                },
                {
                    "type": "openpi_entity_gpt3",
                    "entity": "produce",
                    "attribute": "on the cutting board",
                    "change": "less likely"
                },
                {
                    "type": "openpi_entity_gpt3",
                    "entity": "produce",
                    "attribute": "in the sink",
                    "change": "more likely"
                },
                {
                    "type": "openpi_entity_gpt3",
                    "entity": "produce",
                    "attribute": "on the counter",
                    "change": "less likely"
                },
                {
                    "type": "openpi_entity_gpt3",
                    "entity": "produce",
                    "attribute": "in the sink",
                    "change": "more likely"
                },
                {
                    "type": "openpi_entity_gpt3",
                    "entity": "produce",
                    "attribute": "in the fridge",
                    "change": "less likely"
                },
                {
                    "type": "openpi_entity_gpt3",
                    "entity": "produce",
                    "attribute": "cooked",
                    "change": "more likely"
                },
                {
                    "type": "openpi_entity_gpt3",
                    "entity": "produce",
                    "attribute": "uncooked",
                    "change": "less likely"
                },
                {
                    "type": "openpi_entity_gpt3",
                    "entity": "water",
                    "attribute": "in sink",
                    "change": "more likely"
                },
                {
                    "type": "openpi_entity_gpt3",
                    "entity": "water",
                    "attribute": "in faucet",
                    "change": "less likely"
                },
                {
                    "type": "openpi_entity_gpt3",
                    "entity": "sink",
                    "attribute": "dirty",
                    "change": "more likely"
                },
                {
                    "type": "openpi_entity_gpt3",
                    "entity": "sink",
                    "attribute": "clean",
                    "change": "less likely"
                },
                {
                    "type": "openpi_entity_gpt3",
                    "entity": "knife",
                    "attribute": "dirty",
                    "change": "more likely"
                },
                {
                    "type": "openpi_entity_gpt3",
                    "entity": "knife",
                    "attribute": "clean",
                    "change": "less likely"
                },
                {
                    "type": "openpi_entity_gpt3",
                    "entity": "produce",
                    "attribute": "washed",
                    "change": "more likely"
                },
                {
                    "type": "openpi_entity_gpt3",
                    "entity": "produce",
                    "attribute": "dirty",
                    "change": "less likely"
                },
                {
                    "type": "openpi_entity_gpt3",
                    "entity": "produce",
                    "attribute": "cooked",
                    "change": "more likely"
                },
                {
                    "type": "openpi_entity_gpt3",
                    "entity": "produce",
                    "attribute": "raw",
                    "change": "less likely"
                }
            ],
            [
                {
                    "type": "step",
                    "step": "Wash your hands"
                },
                {
                    "type": "openpi_entity_gpt3",
                    "entity": "hands",
                    "attribute": "wet",
                    "change": "more likely"
                },
                {
                    "type": "openpi_entity_gpt3",
                    "entity": "hands",
                    "attribute": "dry",
                    "change": "less likely"
                },
                {
                    "type": "openpi_entity_gpt3",
                    "entity": "water",
                    "attribute": "in the sink",
                    "change": "more likely"
                },
                {
                    "type": "openpi_entity_gpt3",
                    "entity": "water",
                    "attribute": "in the faucet",
                    "change": "less likely"
                },
                {
                    "type": "openpi_entity_gpt3",
                    "entity": "sink",
                    "attribute": "clean",
                    "change": "more likely"
                },
                {
                    "type": "openpi_entity_gpt3",
                    "entity": "sink",
                    "attribute": "dirty",
                    "change": "less likely"
                },
                {
                    "type": "openpi_entity_gpt3",
                    "entity": "sink",
                    "attribute": "wet",
                    "change": "more likely"
                },
                {
                    "type": "openpi_entity_gpt3",
                    "entity": "sink",
                    "attribute": "dry",
                    "change": "less likely"
                },
                {
                    "type": "openpi_entity_gpt3",
                    "entity": "sink",
                    "attribute": "dirty",
                    "change": "more likely"
                },
                {
                    "type": "openpi_entity_gpt3",
                    "entity": "sink",
                    "attribute": "clean",
                    "change": "less likely"
                },
                {
                    "type": "openpi_entity_gpt3",
                    "entity": "soap",
                    "attribute": "in the sink",
                    "change": "more likely"
                },
                {
                    "type": "openpi_entity_gpt3",
                    "entity": "soap",
                    "attribute": "in the bottle",
                    "change": "less likely"
                },
                {
                    "type": "openpi_entity_gpt3",
                    "entity": "hands",
                    "attribute": "clean",
                    "change": "more likely"
                },
                {
                    "type": "openpi_entity_gpt3",
                    "entity": "hands",
                    "attribute": "dirty",
                    "change": "less likely"
                }
            ],
            [
                {
                    "type": "step",
                    "step": "Cut away any damaged or bruised areas of your produce"
                },
                {
                    "type": "entity",
                    "entity": "produce",
                    "attribute": "containing harmful bacteria",
                    "change": "less likely"
                },
                {
                    "type": "multihop",
                    "event": "I eat the produce and get sick.",
                    "change": "less likely"
                },
                {
                    "type": "openpi_entity_gpt3",
                    "entity": "hands",
                    "attribute": "dirty",
                    "change": "more likely"
                },
                {
                    "type": "openpi_entity_gpt3",
                    "entity": "hands",
                    "attribute": "clean",
                    "change": "less likely"
                },
                {
                    "type": "openpi_entity_gpt3",
                    "entity": "hands",
                    "attribute": "dirty",
                    "change": "more likely"
                },
                {
                    "type": "openpi_entity_gpt3",
                    "entity": "hands",
                    "attribute": "clean",
                    "change": "less likely"
                },
                {
                    "type": "openpi_entity_gpt3",
                    "entity": "knife",
                    "attribute": "dirty",
                    "change": "more likely"
                },
                {
                    "type": "openpi_entity_gpt3",
                    "entity": "knife",
                    "attribute": "clean",
                    "change": "less likely"
                },
                {
                    "type": "openpi_entity_gpt3",
                    "entity": "produce",
                    "attribute": "smooth",
                    "change": "more likely"
                },
                {
                    "type": "openpi_entity_gpt3",
                    "entity": "produce",
                    "attribute": "bruised",
                    "change": "less likely"
                },
                {
                    "type": "openpi_entity_gpt3",
                    "entity": "produce",
                    "attribute": "undamaged",
                    "change": "more likely"
                },
                {
                    "type": "openpi_entity_gpt3",
                    "entity": "produce",
                    "attribute": "damaged",
                    "change": "less likely"
                }
            ],
            [
                {
                    "type": "step",
                    "step": "Clean your countertop, cutting boards, and utensils."
                },
                {
                    "type": "openpi_entity_gpt3",
                    "entity": "utensils",
                    "attribute": "clean",
                    "change": "more likely"
                },
                {
                    "type": "openpi_entity_gpt3",
                    "entity": "utensils",
                    "attribute": "dirty",
                    "change": "less likely"
                },
                {
                    "type": "openpi_entity_gpt3",
                    "entity": "cutting board",
                    "attribute": "clean",
                    "change": "more likely"
                },
                {
                    "type": "openpi_entity_gpt3",
                    "entity": "cutting board",
                    "attribute": "dirty",
                    "change": "less likely"
                },
                {
                    "type": "openpi_entity_gpt3",
                    "entity": "countertop",
                    "attribute": "clean",
                    "change": "more likely"
                },
                {
                    "type": "openpi_entity_gpt3",
                    "entity": "countertop",
                    "attribute": "dirty",
                    "change": "less likely"
                },
                {
                    "type": "openpi_entity_gpt3",
                    "entity": "utensils",
                    "attribute": "dirty",
                    "change": "more likely"
                },
                {
                    "type": "openpi_entity_gpt3",
                    "entity": "utensils",
                    "attribute": "dirty",
                    "change": "less likely"
                },
                {
                    "type": "openpi_entity_gpt3",
                    "entity": "counter",
                    "attribute": "clean",
                    "change": "more likely"
                },
                {
                    "type": "openpi_entity_gpt3",
                    "entity": "counter",
                    "attribute": "dirty",
                    "change": "less likely"
                }
            ],
            [
                {
                    "type": "step",
                    "step": "Rinse produce with cool or cold water"
                },
                {
                    "type": "entity",
                    "entity": "produce",
                    "attribute": "containing harmful bacteria",
                    "change": "less likely"
                },
                {
                    "type": "multihop",
                    "event": "I eat the produce and get sick.",
                    "change": "less likely"
                },
                {
                    "type": "openpi_entity_gpt3",
                    "entity": "produce",
                    "attribute": "cold",
                    "change": "more likely"
                },
                {
                    "type": "openpi_entity_gpt3",
                    "entity": "produce",
                    "attribute": "warm",
                    "change": "less likely"
                },
                {
                    "type": "openpi_entity_gpt3",
                    "entity": "utensils",
                    "attribute": "clean",
                    "change": "more likely"
                },
                {
                    "type": "openpi_entity_gpt3",
                    "entity": "utensils",
                    "attribute": "dirty",
                    "change": "less likely"
                },
                {
                    "type": "openpi_entity_gpt3",
                    "entity": "produce",
                    "attribute": "cool",
                    "change": "more likely"
                },
                {
                    "type": "openpi_entity_gpt3",
                    "entity": "produce",
                    "attribute": "warm",
                    "change": "less likely"
                },
                {
                    "type": "openpi_entity_gpt3",
                    "entity": "counter",
                    "attribute": "wet",
                    "change": "more likely"
                },
                {
                    "type": "openpi_entity_gpt3",
                    "entity": "counter",
                    "attribute": "dry",
                    "change": "less likely"
                },
                {
                    "type": "openpi_entity_gpt3",
                    "entity": "water",
                    "attribute": "in sink",
                    "change": "more likely"
                },
                {
                    "type": "openpi_entity_gpt3",
                    "entity": "water",
                    "attribute": "in faucet",
                    "change": "less likely"
                },
                {
                    "type": "openpi_entity_gpt3",
                    "entity": "cutting board",
                    "attribute": "wet",
                    "change": "more likely"
                },
                {
                    "type": "openpi_entity_gpt3",
                    "entity": "cutting board",
                    "attribute": "dry",
                    "change": "less likely"
                },
                {
                    "type": "openpi_entity_gpt3",
                    "entity": "water",
                    "attribute": "on counter",
                    "change": "more likely"
                },
                {
                    "type": "openpi_entity_gpt3",
                    "entity": "water",
                    "attribute": "in pipes",
                    "change": "less likely"
                },
                {
                    "type": "openpi_entity_gpt3",
                    "entity": "countertop",
                    "attribute": "wet",
                    "change": "more likely"
                },
                {
                    "type": "openpi_entity_gpt3",
                    "entity": "countertop",
                    "attribute": "dry",
                    "change": "less likely"
                },
                {
                    "type": "openpi_entity_gpt3",
                    "entity": "countertop",
                    "attribute": "clean",
                    "change": "more likely"
                },
                {
                    "type": "openpi_entity_gpt3",
                    "entity": "countertop",
                    "attribute": "dirty",
                    "change": "less likely"
                },
                {
                    "type": "openpi_entity_gpt3",
                    "entity": "produce",
                    "attribute": "wet",
                    "change": "more likely"
                },
                {
                    "type": "openpi_entity_gpt3",
                    "entity": "produce",
                    "attribute": "dry",
                    "change": "less likely"
                },
                {
                    "type": "openpi_entity_gpt3",
                    "entity": "utensils",
                    "attribute": "wet",
                    "change": "more likely"
                },
                {
                    "type": "openpi_entity_gpt3",
                    "entity": "utensils",
                    "attribute": "dry",
                    "change": "less likely"
                }
            ],
            [
                {
                    "type": "step",
                    "step": "Scrub any produce with a thick skin"
                },
                {
                    "type": "entity",
                    "entity": "produce",
                    "attribute": "containing harmful bacteria",
                    "change": "less likely"
                },
                {
                    "type": "multihop",
                    "event": "I eat the produce and get sick.",
                    "change": "less likely"
                },
                {
                    "type": "openpi_entity_gpt3",
                    "entity": "utensils",
                    "attribute": "dirty",
                    "change": "more likely"
                },
                {
                    "type": "openpi_entity_gpt3",
                    "entity": "utensils",
                    "attribute": "clean",
                    "change": "less likely"
                },
                {
                    "type": "openpi_entity_gpt3",
                    "entity": "produce",
                    "attribute": "clean",
                    "change": "more likely"
                },
                {
                    "type": "openpi_entity_gpt3",
                    "entity": "produce",
                    "attribute": "dirty",
                    "change": "less likely"
                },
                {
                    "type": "openpi_entity_gpt3",
                    "entity": "scrubber",
                    "attribute": "dirty",
                    "change": "more likely"
                },
                {
                    "type": "openpi_entity_gpt3",
                    "entity": "scrubber",
                    "attribute": "clean",
                    "change": "less likely"
                },
                {
                    "type": "openpi_entity_gpt3",
                    "entity": "countertop",
                    "attribute": "dirty",
                    "change": "more likely"
                },
                {
                    "type": "openpi_entity_gpt3",
                    "entity": "countertop",
                    "attribute": "clean",
                    "change": "less likely"
                }
            ],
            [
                {
                    "type": "step",
                    "step": "Dry produce after washing."
                },
                {
                    "type": "openpi_entity_gpt3",
                    "entity": "produce",
                    "attribute": "in sink",
                    "change": "more likely"
                },
                {
                    "type": "openpi_entity_gpt3",
                    "entity": "produce",
                    "attribute": "on counter",
                    "change": "less likely"
                },
                {
                    "type": "openpi_entity_gpt3",
                    "entity": "produce",
                    "attribute": "dry",
                    "change": "more likely"
                },
                {
                    "type": "openpi_entity_gpt3",
                    "entity": "produce",
                    "attribute": "wet",
                    "change": "less likely"
                },
                {
                    "type": "openpi_entity_gpt3",
                    "entity": "water",
                    "attribute": "in drain",
                    "change": "more likely"
                },
                {
                    "type": "openpi_entity_gpt3",
                    "entity": "water",
                    "attribute": "in produce",
                    "change": "less likely"
                },
                {
                    "type": "openpi_entity_gpt3",
                    "entity": "produce",
                    "attribute": "dry",
                    "change": "more likely"
                },
                {
                    "type": "openpi_entity_gpt3",
                    "entity": "produce",
                    "attribute": "wet",
                    "change": "less likely"
                },
                {
                    "type": "openpi_entity_gpt3",
                    "entity": "water",
                    "attribute": "in sink",
                    "change": "more likely"
                },
                {
                    "type": "openpi_entity_gpt3",
                    "entity": "water",
                    "attribute": "in produce",
                    "change": "less likely"
                },
                {
                    "type": "openpi_entity_gpt3",
                    "entity": "water",
                    "attribute": "in drain",
                    "change": "more likely"
                },
                {
                    "type": "openpi_entity_gpt3",
                    "entity": "water",
                    "attribute": "in sink",
                    "change": "less likely"
                }
            ]
        ]
    },
    "18": {
        "goal": "Store Sweet Potato Pie",
        "annotator": "Shuyan",
        "steps": [
            [
                {
                    "step": "Start"
                }
            ],
            [
                {
                    "type": "step",
                    "step": "Let the pie cool completely on a wire rack."
                },
                {
                    "type": "openpi_entity_gpt3",
                    "entity": "pie",
                    "attribute": "cool",
                    "change": "more likely"
                },
                {
                    "type": "openpi_entity_gpt3",
                    "entity": "pie",
                    "attribute": "warm",
                    "change": "less likely"
                }
            ],
            [
                {
                    "type": "step",
                    "step": "Wrap the pie pan in plastic wrap to make it air-tight."
                },
                {
                    "type": "entity",
                    "entity": "pie",
                    "attribute": "wrapped",
                    "change": "more likely"
                },
                {
                    "type": "multihop",
                    "event": "I eat the pie",
                    "change": "less likely"
                },
                {
                    "type": "openpi_entity_gpt3",
                    "entity": "pie pan",
                    "attribute": "wrapped",
                    "change": "more likely"
                },
                {
                    "type": "openpi_entity_gpt3",
                    "entity": "pie pan",
                    "attribute": "uncovered",
                    "change": "less likely"
                },
                {
                    "type": "openpi_entity_gpt3",
                    "entity": "plastic wrap",
                    "attribute": "on the pie pan",
                    "change": "more likely"
                },
                {
                    "type": "openpi_entity_gpt3",
                    "entity": "plastic wrap",
                    "attribute": "on the roll",
                    "change": "less likely"
                },
                {
                    "type": "openpi_entity_gpt3",
                    "entity": "pie pan",
                    "attribute": "covered",
                    "change": "more likely"
                },
                {
                    "type": "openpi_entity_gpt3",
                    "entity": "pie pan",
                    "attribute": "uncovered",
                    "change": "less likely"
                },
                {
                    "type": "openpi_entity_gpt3",
                    "entity": "pie pan",
                    "attribute": "wrapped",
                    "change": "more likely"
                },
                {
                    "type": "openpi_entity_gpt3",
                    "entity": "pie pan",
                    "attribute": "bare",
                    "change": "less likely"
                },
                {
                    "type": "openpi_entity_gpt3",
                    "entity": "plastic wrap",
                    "attribute": "on pan",
                    "change": "more likely"
                },
                {
                    "type": "openpi_entity_gpt3",
                    "entity": "plastic wrap",
                    "attribute": "on roll",
                    "change": "less likely"
                }
            ],
            [
                {
                    "type": "step",
                    "step": "Put a layer of foil around the outside of the pie pan."
                },
                {
                    "type": "openpi_entity_gpt3",
                    "entity": "foil",
                    "attribute": "on pan",
                    "change": "more likely"
                },
                {
                    "type": "openpi_entity_gpt3",
                    "entity": "foil",
                    "attribute": "on roll",
                    "change": "less likely"
                },
                {
                    "type": "openpi_entity_gpt3",
                    "entity": "foil",
                    "attribute": "on the pie pan",
                    "change": "more likely"
                },
                {
                    "type": "openpi_entity_gpt3",
                    "entity": "foil",
                    "attribute": "on the counter",
                    "change": "less likely"
                },
                {
                    "type": "openpi_entity_gpt3",
                    "entity": "foil",
                    "attribute": "wrapped around pan",
                    "change": "more likely"
                },
                {
                    "type": "openpi_entity_gpt3",
                    "entity": "foil",
                    "attribute": "flat",
                    "change": "less likely"
                },
                {
                    "type": "openpi_entity_gpt3",
                    "entity": "pie pan",
                    "attribute": "covered",
                    "change": "more likely"
                },
                {
                    "type": "openpi_entity_gpt3",
                    "entity": "pie pan",
                    "attribute": "uncovered",
                    "change": "less likely"
                },
                {
                    "type": "openpi_entity_gpt3",
                    "entity": "foil",
                    "attribute": "on pie pan",
                    "change": "more likely"
                },
                {
                    "type": "openpi_entity_gpt3",
                    "entity": "foil",
                    "attribute": "on counter",
                    "change": "less likely"
                }
            ],
            [
                {
                    "type": "step",
                    "step": "Keep the pie in the freezer for up to 1 month"
                },
                {
                    "type": "entity",
                    "entity": "the pie",
                    "attribute": "frozen",
                    "change": "more likely"
                },
                {
                    "type": "multihop",
                    "event": "The pie is rock hard.",
                    "change": "more likely"
                },
                {
                    "type": "openpi_entity_gpt3",
                    "entity": "pie",
                    "attribute": "cold",
                    "change": "more likely"
                },
                {
                    "type": "openpi_entity_gpt3",
                    "entity": "pie",
                    "attribute": "room temperature",
                    "change": "less likely"
                },
                {
                    "type": "openpi_entity_gpt3",
                    "entity": "pie pan",
                    "attribute": "in the freezer",
                    "change": "more likely"
                },
                {
                    "type": "openpi_entity_gpt3",
                    "entity": "pie pan",
                    "attribute": "on the counter",
                    "change": "less likely"
                },
                {
                    "type": "openpi_entity_gpt3",
                    "entity": "pie",
                    "attribute": "in the freezer",
                    "change": "more likely"
                },
                {
                    "type": "openpi_entity_gpt3",
                    "entity": "pie",
                    "attribute": "on the counter",
                    "change": "less likely"
                },
                {
                    "type": "openpi_entity_gpt3",
                    "entity": "pie pan",
                    "attribute": "cold",
                    "change": "more likely"
                },
                {
                    "type": "openpi_entity_gpt3",
                    "entity": "pie pan",
                    "attribute": "warm",
                    "change": "less likely"
                },
                {
                    "type": "openpi_entity_gpt3",
                    "entity": "pie",
                    "attribute": "cold",
                    "change": "more likely"
                },
                {
                    "type": "openpi_entity_gpt3",
                    "entity": "pie",
                    "attribute": "warm",
                    "change": "less likely"
                }
            ]
        ]
    },
    "19": {
        "goal": "Store Fresh Mushrooms",
        "annotator": "Shuyan",
        "steps": [
            [
                {
                    "step": "Start"
                }
            ],
            [
                {
                    "type": "step",
                    "step": "Clean the mushrooms first"
                },
                {
                    "type": "entity",
                    "entity": "the mushrooms",
                    "attribute": "clean",
                    "change": "more likely"
                },
                {
                    "type": "openpi_entity_gpt3",
                    "entity": "dirt",
                    "attribute": "on floor",
                    "change": "more likely"
                },
                {
                    "type": "openpi_entity_gpt3",
                    "entity": "dirt",
                    "attribute": "on mushrooms",
                    "change": "less likely"
                },
                {
                    "type": "openpi_entity_gpt3",
                    "entity": "mushrooms",
                    "attribute": "clean",
                    "change": "more likely"
                },
                {
                    "type": "openpi_entity_gpt3",
                    "entity": "mushrooms",
                    "attribute": "dirty",
                    "change": "less likely"
                },
                {
                    "type": "openpi_entity_gpt3",
                    "entity": "floor",
                    "attribute": "dirty",
                    "change": "more likely"
                },
                {
                    "type": "openpi_entity_gpt3",
                    "entity": "floor",
                    "attribute": "clean",
                    "change": "less likely"
                }
            ],
            [
                {
                    "type": "step",
                    "step": "Brush with towel or mushroom brush"
                },
                {
                    "type": "entity",
                    "entity": "the mushrooms",
                    "attribute": "clean",
                    "change": "more likely"
                },
                {
                    "type": "openpi_entity_gpt3",
                    "entity": "brush",
                    "attribute": "dirty",
                    "change": "more likely"
                },
                {
                    "type": "openpi_entity_gpt3",
                    "entity": "brush",
                    "attribute": "clean",
                    "change": "less likely"
                },
                {
                    "type": "openpi_entity_gpt3",
                    "entity": "towel",
                    "attribute": "on the table",
                    "change": "more likely"
                },
                {
                    "type": "openpi_entity_gpt3",
                    "entity": "towel",
                    "attribute": "in the closet",
                    "change": "less likely"
                },
                {
                    "type": "openpi_entity_gpt3",
                    "entity": "towel",
                    "attribute": "dirty",
                    "change": "more likely"
                },
                {
                    "type": "openpi_entity_gpt3",
                    "entity": "towel",
                    "attribute": "clean",
                    "change": "less likely"
                }
            ],
            [
                {
                    "type": "step",
                    "step": "Slice and saute the mushrooms."
                },
                {
                    "type": "entity",
                    "entity": "the mushrooms",
                    "attribute": "hot",
                    "change": "more likely"
                },
                {
                    "type": "entity",
                    "entity": "the mushroom",
                    "attribute": "cooked",
                    "change": "more likely"
                },
                {
                    "type": "multihop",
                    "event": "I eat the mushrooms safely.",
                    "change": "more likely"
                },
                {
                    "type": "openpi_entity_gpt3",
                    "entity": "pan",
                    "attribute": "dirty",
                    "change": "more likely"
                },
                {
                    "type": "openpi_entity_gpt3",
                    "entity": "pan",
                    "attribute": "clean",
                    "change": "less likely"
                },
                {
                    "type": "openpi_entity_gpt3",
                    "entity": "mushrooms",
                    "attribute": "in the pan",
                    "change": "more likely"
                },
                {
                    "type": "openpi_entity_gpt3",
                    "entity": "mushrooms",
                    "attribute": "on the cutting board",
                    "change": "less likely"
                },
                {
                    "type": "openpi_entity_gpt3",
                    "entity": "mushrooms",
                    "attribute": "sliced",
                    "change": "more likely"
                },
                {
                    "type": "openpi_entity_gpt3",
                    "entity": "mushrooms",
                    "attribute": "whole",
                    "change": "less likely"
                },
                {
                    "type": "openpi_entity_gpt3",
                    "entity": "mushrooms",
                    "attribute": "hot",
                    "change": "more likely"
                },
                {
                    "type": "openpi_entity_gpt3",
                    "entity": "mushrooms",
                    "attribute": "cold",
                    "change": "less likely"
                },
                {
                    "type": "openpi_entity_gpt3",
                    "entity": "mushrooms",
                    "attribute": "cooked",
                    "change": "more likely"
                },
                {
                    "type": "openpi_entity_gpt3",
                    "entity": "mushrooms",
                    "attribute": "raw",
                    "change": "less likely"
                },
                {
                    "type": "openpi_entity_gpt3",
                    "entity": "mushrooms",
                    "attribute": "in the pan",
                    "change": "more likely"
                },
                {
                    "type": "openpi_entity_gpt3",
                    "entity": "mushrooms",
                    "attribute": "on the counter",
                    "change": "less likely"
                },
                {
                    "type": "openpi_entity_gpt3",
                    "entity": "mushrooms",
                    "attribute": "in pan",
                    "change": "more likely"
                },
                {
                    "type": "openpi_entity_gpt3",
                    "entity": "mushrooms",
                    "attribute": "on plate",
                    "change": "less likely"
                },
                {
                    "type": "openpi_entity_gpt3",
                    "entity": "knife",
                    "attribute": "dirty",
                    "change": "more likely"
                },
                {
                    "type": "openpi_entity_gpt3",
                    "entity": "knife",
                    "attribute": "clean",
                    "change": "less likely"
                },
                {
                    "type": "openpi_entity_gpt3",
                    "entity": "plate",
                    "attribute": "dirty",
                    "change": "more likely"
                },
                {
                    "type": "openpi_entity_gpt3",
                    "entity": "plate",
                    "attribute": "clean",
                    "change": "less likely"
                },
                {
                    "type": "openpi_entity_gpt3",
                    "entity": "mushrooms",
                    "attribute": "in the pan",
                    "change": "more likely"
                },
                {
                    "type": "openpi_entity_gpt3",
                    "entity": "mushrooms",
                    "attribute": "on the plate",
                    "change": "less likely"
                },
                {
                    "type": "openpi_entity_gpt3",
                    "entity": "mushrooms",
                    "attribute": "in pan",
                    "change": "more likely"
                },
                {
                    "type": "openpi_entity_gpt3",
                    "entity": "mushrooms",
                    "attribute": "on counter",
                    "change": "less likely"
                }
            ],
            [
                {
                    "type": "step",
                    "step": "Let the mushrooms cool"
                },
                {
                    "type": "entity",
                    "entity": "the mushrooms",
                    "attribute": "hot",
                    "change": "less likely"
                },
                {
                    "type": "openpi_entity_gpt3",
                    "entity": "mushrooms",
                    "attribute": "cooler",
                    "change": "more likely"
                },
                {
                    "type": "openpi_entity_gpt3",
                    "entity": "mushrooms",
                    "attribute": "hot",
                    "change": "less likely"
                },
                {
                    "type": "openpi_entity_gpt3",
                    "entity": "mushrooms",
                    "attribute": "cool",
                    "change": "more likely"
                },
                {
                    "type": "openpi_entity_gpt3",
                    "entity": "mushrooms",
                    "attribute": "hot",
                    "change": "less likely"
                }
            ],
            [
                {
                    "type": "step",
                    "step": "Freeze in plastic resealable bags"
                },
                {
                    "type": "entity",
                    "entity": "the mushroom",
                    "attribute": "frozen",
                    "change": "more likely"
                },
                {
                    "type": "multihop",
                    "event": "I eat the mushrooms.",
                    "change": "less likely"
                },
                {
                    "type": "openpi_entity_gpt3",
                    "entity": "mushrooms",
                    "attribute": "cold",
                    "change": "more likely"
                },
                {
                    "type": "openpi_entity_gpt3",
                    "entity": "mushrooms",
                    "attribute": "room temperature",
                    "change": "less likely"
                },
                {
                    "type": "openpi_entity_gpt3",
                    "entity": "mushrooms",
                    "attribute": "cold",
                    "change": "more likely"
                },
                {
                    "type": "openpi_entity_gpt3",
                    "entity": "mushrooms",
                    "attribute": "warm",
                    "change": "less likely"
                },
                {
                    "type": "openpi_entity_gpt3",
                    "entity": "mushrooms",
                    "attribute": "in the freezer",
                    "change": "more likely"
                },
                {
                    "type": "openpi_entity_gpt3",
                    "entity": "mushrooms",
                    "attribute": "on the plate",
                    "change": "less likely"
                },
                {
                    "type": "openpi_entity_gpt3",
                    "entity": "mushrooms",
                    "attribute": "in bag",
                    "change": "more likely"
                },
                {
                    "type": "openpi_entity_gpt3",
                    "entity": "mushrooms",
                    "attribute": "on plate",
                    "change": "less likely"
                }
            ]
        ]
    },
    "21": {
        "goal": "Grind coffee beans",
        "annotator": "Shuyan",
        "steps": [
            [
                {
                    "step": "Start."
                }
            ],
            [
                {
                    "type": "step",
                    "step": "Prepare a sealed jar"
                },
                {
                    "type": "openpi_entity_gpt3",
                    "entity": "jar",
                    "attribute": "sealed",
                    "change": "more likely"
                },
                {
                    "type": "openpi_entity_gpt3",
                    "entity": "jar",
                    "attribute": "open",
                    "change": "less likely"
                },
                {
                    "type": "openpi_entity_gpt3",
                    "entity": "lid",
                    "attribute": "on the jar",
                    "change": "more likely"
                },
                {
                    "type": "openpi_entity_gpt3",
                    "entity": "lid",
                    "attribute": "on the table",
                    "change": "less likely"
                },
                {
                    "type": "openpi_entity_gpt3",
                    "entity": "jar",
                    "attribute": "on table",
                    "change": "more likely"
                },
                {
                    "type": "openpi_entity_gpt3",
                    "entity": "jar",
                    "attribute": "in cabinet",
                    "change": "less likely"
                },
                {
                    "type": "openpi_entity_gpt3",
                    "entity": "jar",
                    "attribute": "sealed",
                    "change": "more likely"
                },
                {
                    "type": "openpi_entity_gpt3",
                    "entity": "jar",
                    "attribute": "unsealed",
                    "change": "less likely"
                }
            ],
            [
                {
                    "type": "step",
                    "step": "Open the lid of the jar"
                },
                {
                    "type": "entity",
                    "entity": "the jar",
                    "attribute": "open",
                    "change": "more likely"
                },
                {
                    "type": "multihop",
                    "event": "I remove all contents from the jar.",
                    "change": "more likely"
                },
                {
                    "type": "openpi_entity_gpt3",
                    "entity": "jar",
                    "attribute": "sealed",
                    "change": "more likely"
                },
                {
                    "type": "openpi_entity_gpt3",
                    "entity": "jar",
                    "attribute": "open",
                    "change": "less likely"
                },
                {
                    "type": "openpi_entity_gpt3",
                    "entity": "jar",
                    "attribute": "closed",
                    "change": "more likely"
                },
                {
                    "type": "openpi_entity_gpt3",
                    "entity": "jar",
                    "attribute": "open",
                    "change": "less likely"
                }
            ],
            [
                {
                    "type": "step",
                    "step": "Open the coffee bean bag"
                },
                {
                    "type": "entity",
                    "entity": "the coffee bean bag",
                    "attribute": "open",
                    "change": "more likely"
                },
                {
                    "type": "multihop",
                    "event": "I remove all contents from the coffee bean bag.",
                    "change": "more likely"
                },
                {
                    "type": "openpi_entity_gpt3",
                    "entity": "bag",
                    "attribute": "open",
                    "change": "more likely"
                },
                {
                    "type": "openpi_entity_gpt3",
                    "entity": "bag",
                    "attribute": "sealed",
                    "change": "less likely"
                },
                {
                    "type": "openpi_entity_gpt3",
                    "entity": "bag",
                    "attribute": "open",
                    "change": "more likely"
                },
                {
                    "type": "openpi_entity_gpt3",
                    "entity": "bag",
                    "attribute": "closed",
                    "change": "less likely"
                },
                {
                    "type": "openpi_entity_gpt3",
                    "entity": "fee bean bag",
                    "attribute": "open",
                    "change": "more likely"
                },
                {
                    "type": "openpi_entity_gpt3",
                    "entity": "fee bean bag",
                    "attribute": "closed",
                    "change": "less likely"
                }
            ],
            [
                {
                    "type": "step",
                    "step": "Open the lid of the grinder."
                },
                {
                    "type": "openpi_entity_gpt3",
                    "entity": "lid",
                    "attribute": "open",
                    "change": "more likely"
                },
                {
                    "type": "openpi_entity_gpt3",
                    "entity": "lid",
                    "attribute": "closed",
                    "change": "less likely"
                },
                {
                    "type": "openpi_entity_gpt3",
                    "entity": "grinder",
                    "attribute": "on",
                    "change": "more likely"
                },
                {
                    "type": "openpi_entity_gpt3",
                    "entity": "grinder",
                    "attribute": "off",
                    "change": "less likely"
                },
                {
                    "type": "openpi_entity_gpt3",
                    "entity": "lid",
                    "attribute": "open",
                    "change": "more likely"
                },
                {
                    "type": "openpi_entity_gpt3",
                    "entity": "lid",
                    "attribute": "closed",
                    "change": "less likely"
                },
                {
                    "type": "openpi_entity_gpt3",
                    "entity": "jar",
                    "attribute": "open",
                    "change": "more likely"
                },
                {
                    "type": "openpi_entity_gpt3",
                    "entity": "jar",
                    "attribute": "closed",
                    "change": "less likely"
                },
                {
                    "type": "openpi_entity_gpt3",
                    "entity": "grinder",
                    "attribute": "open",
                    "change": "more likely"
                },
                {
                    "type": "openpi_entity_gpt3",
                    "entity": "grinder",
                    "attribute": "closed",
                    "change": "less likely"
                }
            ],
            [
                {
                    "type": "step",
                    "step": "Pour some coffee beans to the grinder"
                },
                {
                    "type": "entity",
                    "entity": "the grinder",
                    "attribute": "empty",
                    "change": "less likely"
                },
                {
                    "type": "openpi_entity_gpt3",
                    "entity": "jar",
                    "attribute": "full",
                    "change": "more likely"
                },
                {
                    "type": "openpi_entity_gpt3",
                    "entity": "jar",
                    "attribute": "empty",
                    "change": "less likely"
                },
                {
                    "type": "openpi_entity_gpt3",
                    "entity": "beans",
                    "attribute": "in jar",
                    "change": "more likely"
                },
                {
                    "type": "openpi_entity_gpt3",
                    "entity": "beans",
                    "attribute": "in bag",
                    "change": "less likely"
                },
                {
                    "type": "openpi_entity_gpt3",
                    "entity": "beans",
                    "attribute": "in grinder",
                    "change": "more likely"
                },
                {
                    "type": "openpi_entity_gpt3",
                    "entity": "beans",
                    "attribute": "in bag",
                    "change": "less likely"
                }
            ],
            [
                {
                    "type": "step",
                    "step": "Plug in the grinder"
                },
                {
                    "type": "openpi_entity_gpt3",
                    "entity": "grinder",
                    "attribute": "on",
                    "change": "more likely"
                },
                {
                    "type": "openpi_entity_gpt3",
                    "entity": "grinder",
                    "attribute": "off",
                    "change": "less likely"
                },
                {
                    "type": "openpi_entity_gpt3",
                    "entity": "grinder",
                    "attribute": "turned on",
                    "change": "more likely"
                },
                {
                    "type": "openpi_entity_gpt3",
                    "entity": "grinder",
                    "attribute": "turned off",
                    "change": "less likely"
                },
                {
                    "type": "openpi_entity_gpt3",
                    "entity": "grinder",
                    "attribute": "on",
                    "change": "more likely"
                },
                {
                    "type": "openpi_entity_gpt3",
                    "entity": "grinder",
                    "attribute": "off",
                    "change": "less likely"
                },
                {
                    "type": "openpi_entity_gpt3",
                    "entity": "plug",
                    "attribute": "plugged in",
                    "change": "more likely"
                },
                {
                    "type": "openpi_entity_gpt3",
                    "entity": "plug",
                    "attribute": "unplugged",
                    "change": "less likely"
                }
            ],
            [
                {
                    "type": "step",
                    "step": "Set the grinding options"
                },
                {
                    "type": "openpi_entity_gpt3",
                    "entity": "grinding options",
                    "attribute": "set",
                    "change": "more likely"
                },
                {
                    "type": "openpi_entity_gpt3",
                    "entity": "grinding options",
                    "attribute": "unselected",
                    "change": "less likely"
                },
                {
                    "type": "openpi_entity_gpt3",
                    "entity": "options",
                    "attribute": "set",
                    "change": "more likely"
                },
                {
                    "type": "openpi_entity_gpt3",
                    "entity": "options",
                    "attribute": "unselected",
                    "change": "less likely"
                },
                {
                    "type": "openpi_entity_gpt3",
                    "entity": "grinder",
                    "attribute": "on",
                    "change": "more likely"
                },
                {
                    "type": "openpi_entity_gpt3",
                    "entity": "grinder",
                    "attribute": "off",
                    "change": "less likely"
                },
                {
                    "type": "openpi_entity_gpt3",
                    "entity": "grinding options",
                    "attribute": "set",
                    "change": "more likely"
                },
                {
                    "type": "openpi_entity_gpt3",
                    "entity": "grinding options",
                    "attribute": "unselected",
                    "change": "less likely"
                },
                {
                    "type": "openpi_entity_gpt3",
                    "entity": "grinder",
                    "attribute": "turned on",
                    "change": "more likely"
                },
                {
                    "type": "openpi_entity_gpt3",
                    "entity": "grinder",
                    "attribute": "turned off",
                    "change": "less likely"
                }
            ],
            [
                {
                    "type": "step",
                    "step": "Press the button"
                },
                {
                    "type": "openpi_entity_gpt3",
                    "entity": "hand",
                    "attribute": "on the button",
                    "change": "more likely"
                },
                {
                    "type": "openpi_entity_gpt3",
                    "entity": "hand",
                    "attribute": "on the table",
                    "change": "less likely"
                },
                {
                    "type": "openpi_entity_gpt3",
                    "entity": "grinder",
                    "attribute": "on",
                    "change": "more likely"
                },
                {
                    "type": "openpi_entity_gpt3",
                    "entity": "grinder",
                    "attribute": "off",
                    "change": "less likely"
                },
                {
                    "type": "openpi_entity_gpt3",
                    "entity": "button",
                    "attribute": "pressed",
                    "change": "more likely"
                },
                {
                    "type": "openpi_entity_gpt3",
                    "entity": "button",
                    "attribute": "unpressed",
                    "change": "less likely"
                },
                {
                    "type": "openpi_entity_gpt3",
                    "entity": "button",
                    "attribute": "plugged in",
                    "change": "more likely"
                },
                {
                    "type": "openpi_entity_gpt3",
                    "entity": "button",
                    "attribute": "unplugged",
                    "change": "less likely"
                },
                {
                    "type": "openpi_entity_gpt3",
                    "entity": "grinder",
                    "attribute": "on",
                    "change": "more likely"
                },
                {
                    "type": "openpi_entity_gpt3",
                    "entity": "grinder",
                    "attribute": "off",
                    "change": "less likely"
                }
            ],
            [
                {
                    "type": "step",
                    "step": "Wait until the grinder stops automatically"
                },
                {
                    "type": "entity",
                    "entity": "the coffee bean",
                    "attribute": "grounded",
                    "change": "more likely"
                },
                {
                    "type": "multihop",
                    "event": "The coffee beans are in the shape of powder.",
                    "change": "more likely"
                },
                {
                    "type": "openpi_entity_gpt3",
                    "entity": "grinder",
                    "attribute": "powasd off",
                    "change": "more likely"
                },
                {
                    "type": "openpi_entity_gpt3",
                    "entity": "grinder",
                    "attribute": "powasd powasd",
                    "change": "less likely"
                },
                {
                    "type": "openpi_entity_gpt3",
                    "entity": "grinder",
                    "attribute": "powasd off",
                    "change": "more likely"
                },
                {
                    "type": "openpi_entity_gpt3",
                    "entity": "grinder",
                    "attribute": "powasd powasd",
                    "change": "less likely"
                },
                {
                    "type": "openpi_entity_gpt3",
                    "entity": "the grinder",
                    "attribute": "stopped",
                    "change": "more likely"
                },
                {
                    "type": "openpi_entity_gpt3",
                    "entity": "the grinder",
                    "attribute": "running",
                    "change": "less likely"
                },
                {
                    "type": "openpi_entity_gpt3",
                    "entity": "the button",
                    "attribute": "pressed",
                    "change": "more likely"
                },
                {
                    "type": "openpi_entity_gpt3",
                    "entity": "the button",
                    "attribute": "unpressed",
                    "change": "less likely"
                }
            ],
            [
                {
                    "type": "step",
                    "step": "Open the lid of the grinder"
                },
                {
                    "type": "multihop",
                    "event": "I can use the beans to make expresso.",
                    "change": "more likely"
                },
                {
                    "type": "openpi_entity_gpt3",
                    "entity": "grinder",
                    "attribute": "on",
                    "change": "more likely"
                },
                {
                    "type": "openpi_entity_gpt3",
                    "entity": "grinder",
                    "attribute": "off",
                    "change": "less likely"
                },
                {
                    "type": "openpi_entity_gpt3",
                    "entity": "jar",
                    "attribute": "closed",
                    "change": "more likely"
                },
                {
                    "type": "openpi_entity_gpt3",
                    "entity": "jar",
                    "attribute": "open",
                    "change": "less likely"
                },
                {
                    "type": "openpi_entity_gpt3",
                    "entity": "lid",
                    "attribute": "open",
                    "change": "more likely"
                },
                {
                    "type": "openpi_entity_gpt3",
                    "entity": "lid",
                    "attribute": "closed",
                    "change": "less likely"
                }
            ],
            [
                {
                    "type": "step",
                    "step": "Pour all the grounded coffee into the jar"
                },
                {
                    "type": "entity",
                    "entity": "the grinder",
                    "attribute": "empty",
                    "change": "more likely"
                },
                {
                    "type": "openpi_entity_gpt3",
                    "entity": "fee",
                    "attribute": "in the jar",
                    "change": "more likely"
                },
                {
                    "type": "openpi_entity_gpt3",
                    "entity": "fee",
                    "attribute": "in the grinder",
                    "change": "less likely"
                },
                {
                    "type": "openpi_entity_gpt3",
                    "entity": "jar",
                    "attribute": "full",
                    "change": "more likely"
                },
                {
                    "type": "openpi_entity_gpt3",
                    "entity": "jar",
                    "attribute": "empty",
                    "change": "less likely"
                },
                {
                    "type": "openpi_entity_gpt3",
                    "entity": "jar",
                    "attribute": "heavier",
                    "change": "more likely"
                },
                {
                    "type": "openpi_entity_gpt3",
                    "entity": "jar",
                    "attribute": "lighter",
                    "change": "less likely"
                }
            ],
            [
                {
                    "type": "step",
                    "step": "Seal the jar"
                },
                {
                    "type": "entity",
                    "entity": "the jar",
                    "attribute": "open",
                    "change": "less likely"
                },
                {
                    "type": "multihop",
                    "event": "I remove all contents from the jar.",
                    "change": "less likely"
                },
                {
                    "type": "openpi_entity_gpt3",
                    "entity": "fee",
                    "attribute": "in the jar",
                    "change": "more likely"
                },
                {
                    "type": "openpi_entity_gpt3",
                    "entity": "fee",
                    "attribute": "in the grinder",
                    "change": "less likely"
                },
                {
                    "type": "openpi_entity_gpt3",
                    "entity": "jar",
                    "attribute": "sealed",
                    "change": "more likely"
                },
                {
                    "type": "openpi_entity_gpt3",
                    "entity": "jar",
                    "attribute": "open",
                    "change": "less likely"
                },
                {
                    "type": "openpi_entity_gpt3",
                    "entity": "lid",
                    "attribute": "on jar",
                    "change": "more likely"
                },
                {
                    "type": "openpi_entity_gpt3",
                    "entity": "lid",
                    "attribute": "off jar",
                    "change": "less likely"
                }
            ],
            [
                {
                    "type": "step",
                    "step": "Unplug the grinder."
                },
                {
                    "type": "openpi_entity_gpt3",
                    "entity": "fee",
                    "attribute": "in the jar",
                    "change": "more likely"
                },
                {
                    "type": "openpi_entity_gpt3",
                    "entity": "fee",
                    "attribute": "in the grinder",
                    "change": "less likely"
                },
                {
                    "type": "openpi_entity_gpt3",
                    "entity": "fee",
                    "attribute": "in the ground coffee",
                    "change": "more likely"
                },
                {
                    "type": "openpi_entity_gpt3",
                    "entity": "fee",
                    "attribute": "in the jar",
                    "change": "less likely"
                },
                {
                    "type": "openpi_entity_gpt3",
                    "entity": "grinder",
                    "attribute": "unplugged",
                    "change": "more likely"
                },
                {
                    "type": "openpi_entity_gpt3",
                    "entity": "grinder",
                    "attribute": "plugged in",
                    "change": "less likely"
                },
                {
                    "type": "openpi_entity_gpt3",
                    "entity": "jar",
                    "attribute": "sealed",
                    "change": "more likely"
                },
                {
                    "type": "openpi_entity_gpt3",
                    "entity": "jar",
                    "attribute": "unsealed",
                    "change": "less likely"
                },
                {
                    "type": "openpi_entity_gpt3",
                    "entity": "fee beans",
                    "attribute": "in the jar",
                    "change": "more likely"
                },
                {
                    "type": "openpi_entity_gpt3",
                    "entity": "fee beans",
                    "attribute": "in the bag",
                    "change": "less likely"
                },
                {
                    "type": "openpi_entity_gpt3",
                    "entity": "plug",
                    "attribute": "out of the socket",
                    "change": "more likely"
                },
                {
                    "type": "openpi_entity_gpt3",
                    "entity": "plug",
                    "attribute": "in",
                    "change": "less likely"
                },
                {
                    "type": "openpi_entity_gpt3",
                    "entity": "grinder",
                    "attribute": "off",
                    "change": "more likely"
                },
                {
                    "type": "openpi_entity_gpt3",
                    "entity": "grinder",
                    "attribute": "on",
                    "change": "less likely"
                }
            ],
            [
                {
                    "type": "step",
                    "step": "Seal the coffee bean bag."
                },
                {
                    "type": "entity",
                    "entity": "the coffee bean bag",
                    "attribute": "open",
                    "change": "less likely"
                },
                {
                    "type": "multihop",
                    "event": "I remove all contents from the coffee bean bag.",
                    "change": "less likely"
                },
                {
                    "type": "openpi_entity_gpt3",
                    "entity": "fee bean bag",
                    "attribute": "in bag",
                    "change": "more likely"
                },
                {
                    "type": "openpi_entity_gpt3",
                    "entity": "fee bean bag",
                    "attribute": "in jar",
                    "change": "less likely"
                },
                {
                    "type": "openpi_entity_gpt3",
                    "entity": "fee bean bag",
                    "attribute": "on the table",
                    "change": "more likely"
                },
                {
                    "type": "openpi_entity_gpt3",
                    "entity": "fee bean bag",
                    "attribute": "in the cupboard",
                    "change": "less likely"
                },
                {
                    "type": "openpi_entity_gpt3",
                    "entity": "bag",
                    "attribute": "sealed",
                    "change": "more likely"
                },
                {
                    "type": "openpi_entity_gpt3",
                    "entity": "bag",
                    "attribute": "open",
                    "change": "less likely"
                },
                {
                    "type": "openpi_entity_gpt3",
                    "entity": "fee bean bag",
                    "attribute": "sealed",
                    "change": "more likely"
                },
                {
                    "type": "openpi_entity_gpt3",
                    "entity": "fee bean bag",
                    "attribute": "loose",
                    "change": "less likely"
                }
            ]
        ]
    },
    "22": {
        "goal": "Make coffee expresso",
        "annotator": "Shuyan",
        "steps": [
            [
                {
                    "step": "Start."
                }
            ],
            [
                {
                    "type": "step",
                    "step": "Power on the expresso machine"
                },
                {
                    "type": "entity",
                    "entity": "the coffee machine",
                    "attribute": "powered on",
                    "change": "more likely"
                },
                {
                    "type": "multihop",
                    "event": "An indicator light shines.",
                    "change": "more likely"
                },
                {
                    "type": "openpi_entity_gpt3",
                    "entity": "machine",
                    "attribute": "on",
                    "change": "more likely"
                },
                {
                    "type": "openpi_entity_gpt3",
                    "entity": "machine",
                    "attribute": "off",
                    "change": "less likely"
                },
                {
                    "type": "openpi_entity_gpt3",
                    "entity": "machine",
                    "attribute": "turned on",
                    "change": "more likely"
                },
                {
                    "type": "openpi_entity_gpt3",
                    "entity": "machine",
                    "attribute": "turned off",
                    "change": "less likely"
                },
                {
                    "type": "openpi_entity_gpt3",
                    "entity": "expresso machine",
                    "attribute": "on",
                    "change": "more likely"
                },
                {
                    "type": "openpi_entity_gpt3",
                    "entity": "expresso machine",
                    "attribute": "off",
                    "change": "less likely"
                },
                {
                    "type": "openpi_entity_gpt3",
                    "entity": "machine",
                    "attribute": "on",
                    "change": "more likely"
                },
                {
                    "type": "openpi_entity_gpt3",
                    "entity": "machine",
                    "attribute": "off",
                    "change": "less likely"
                }
            ],
            [
                {
                    "type": "step",
                    "step": "Turn the machine to expresso mode."
                },
                {
                    "type": "openpi_entity_gpt3",
                    "entity": "expresso mode",
                    "attribute": "on",
                    "change": "more likely"
                },
                {
                    "type": "openpi_entity_gpt3",
                    "entity": "expresso mode",
                    "attribute": "off",
                    "change": "less likely"
                },
                {
                    "type": "openpi_entity_gpt3",
                    "entity": "machine",
                    "attribute": "on",
                    "change": "more likely"
                },
                {
                    "type": "openpi_entity_gpt3",
                    "entity": "machine",
                    "attribute": "off",
                    "change": "less likely"
                },
                {
                    "type": "openpi_entity_gpt3",
                    "entity": "expresso mode",
                    "attribute": "selected",
                    "change": "more likely"
                },
                {
                    "type": "openpi_entity_gpt3",
                    "entity": "expresso mode",
                    "attribute": "unselected",
                    "change": "less likely"
                },
                {
                    "type": "openpi_entity_gpt3",
                    "entity": "machine",
                    "attribute": "on",
                    "change": "more likely"
                },
                {
                    "type": "openpi_entity_gpt3",
                    "entity": "machine",
                    "attribute": "off",
                    "change": "less likely"
                }
            ],
            [
                {
                    "type": "step",
                    "step": "Open the container where the grounded coffee is."
                },
                {
                    "type": "openpi_entity_gpt3",
                    "entity": "container",
                    "attribute": "open",
                    "change": "more likely"
                },
                {
                    "type": "openpi_entity_gpt3",
                    "entity": "container",
                    "attribute": "closed",
                    "change": "less likely"
                },
                {
                    "type": "openpi_entity_gpt3",
                    "entity": "container",
                    "attribute": "open",
                    "change": "more likely"
                },
                {
                    "type": "openpi_entity_gpt3",
                    "entity": "container",
                    "attribute": "closed",
                    "change": "less likely"
                },
                {
                    "type": "openpi_entity_gpt3",
                    "entity": "container",
                    "attribute": "on the counter top",
                    "change": "more likely"
                },
                {
                    "type": "openpi_entity_gpt3",
                    "entity": "container",
                    "attribute": "in the cabinet",
                    "change": "less likely"
                }
            ],
            [
                {
                    "type": "step",
                    "step": "Scoop the right amount of coffee to the portafilter."
                },
                {
                    "type": "openpi_entity_gpt3",
                    "entity": "portafilter",
                    "attribute": "full",
                    "change": "more likely"
                },
                {
                    "type": "openpi_entity_gpt3",
                    "entity": "portafilter",
                    "attribute": "empty",
                    "change": "less likely"
                },
                {
                    "type": "openpi_entity_gpt3",
                    "entity": "fee",
                    "attribute": "on the portafilter",
                    "change": "more likely"
                },
                {
                    "type": "openpi_entity_gpt3",
                    "entity": "fee",
                    "attribute": "in the container",
                    "change": "less likely"
                },
                {
                    "type": "openpi_entity_gpt3",
                    "entity": "container",
                    "attribute": "empty",
                    "change": "more likely"
                },
                {
                    "type": "openpi_entity_gpt3",
                    "entity": "container",
                    "attribute": "full",
                    "change": "less likely"
                },
                {
                    "type": "openpi_entity_gpt3",
                    "entity": "fee",
                    "attribute": "in portafilter",
                    "change": "more likely"
                },
                {
                    "type": "openpi_entity_gpt3",
                    "entity": "fee",
                    "attribute": "in container",
                    "change": "less likely"
                }
            ],
            [
                {
                    "type": "step",
                    "step": "Put a cup under the portafilter"
                },
                {
                    "type": "openpi_entity_gpt3",
                    "entity": "cup",
                    "attribute": "under the portafilter",
                    "change": "more likely"
                },
                {
                    "type": "openpi_entity_gpt3",
                    "entity": "cup",
                    "attribute": "in cupboard",
                    "change": "less likely"
                },
                {
                    "type": "openpi_entity_gpt3",
                    "entity": "portafilter",
                    "attribute": "empty",
                    "change": "more likely"
                },
                {
                    "type": "openpi_entity_gpt3",
                    "entity": "portafilter",
                    "attribute": "full",
                    "change": "less likely"
                },
                {
                    "type": "openpi_entity_gpt3",
                    "entity": "cup",
                    "attribute": "under the portafilter",
                    "change": "more likely"
                },
                {
                    "type": "openpi_entity_gpt3",
                    "entity": "cup",
                    "attribute": "in the cupboard",
                    "change": "less likely"
                },
                {
                    "type": "openpi_entity_gpt3",
                    "entity": "container",
                    "attribute": "empty",
                    "change": "more likely"
                },
                {
                    "type": "openpi_entity_gpt3",
                    "entity": "container",
                    "attribute": "full",
                    "change": "less likely"
                },
                {
                    "type": "openpi_entity_gpt3",
                    "entity": "fee",
                    "attribute": "in the cup",
                    "change": "more likely"
                },
                {
                    "type": "openpi_entity_gpt3",
                    "entity": "fee",
                    "attribute": "in the container",
                    "change": "less likely"
                },
                {
                    "type": "openpi_entity_gpt3",
                    "entity": "fee",
                    "attribute": "in cup",
                    "change": "more likely"
                },
                {
                    "type": "openpi_entity_gpt3",
                    "entity": "fee",
                    "attribute": "in container",
                    "change": "less likely"
                }
            ],
            [
                {
                    "type": "step",
                    "step": "Wait until the expresso mode is ready"
                },
                {
                    "type": "openpi_entity_gpt3",
                    "entity": "expresso mode",
                    "attribute": "on",
                    "change": "more likely"
                },
                {
                    "type": "openpi_entity_gpt3",
                    "entity": "expresso mode",
                    "attribute": "off",
                    "change": "less likely"
                }
            ],
            [
                {
                    "type": "step",
                    "step": "Set the machine to expresso producing mode"
                },
                {
                    "type": "openpi_entity_gpt3",
                    "entity": "expresso mode",
                    "attribute": "on",
                    "change": "more likely"
                },
                {
                    "type": "openpi_entity_gpt3",
                    "entity": "expresso mode",
                    "attribute": "off",
                    "change": "less likely"
                },
                {
                    "type": "openpi_entity_gpt3",
                    "entity": "machine",
                    "attribute": "on",
                    "change": "more likely"
                },
                {
                    "type": "openpi_entity_gpt3",
                    "entity": "machine",
                    "attribute": "off",
                    "change": "less likely"
                },
                {
                    "type": "openpi_entity_gpt3",
                    "entity": "expresso mode",
                    "attribute": "selected",
                    "change": "more likely"
                },
                {
                    "type": "openpi_entity_gpt3",
                    "entity": "expresso mode",
                    "attribute": "unselected",
                    "change": "less likely"
                }
            ],
            [
                {
                    "type": "step",
                    "step": "Stop the coffee machine"
                },
                {
                    "type": "entity",
                    "entity": "the expresso",
                    "attribute": "ready",
                    "change": "more likely"
                },
                {
                    "type": "multihop",
                    "event": "I drink the coffee expresso.",
                    "change": "more likely"
                },
                {
                    "type": "openpi_entity_gpt3",
                    "entity": "fee machine",
                    "attribute": "cool",
                    "change": "more likely"
                },
                {
                    "type": "openpi_entity_gpt3",
                    "entity": "fee machine",
                    "attribute": "hot",
                    "change": "less likely"
                },
                {
                    "type": "openpi_entity_gpt3",
                    "entity": "fee machine",
                    "attribute": "cold",
                    "change": "more likely"
                },
                {
                    "type": "openpi_entity_gpt3",
                    "entity": "fee machine",
                    "attribute": "hot",
                    "change": "less likely"
                },
                {
                    "type": "openpi_entity_gpt3",
                    "entity": "fee machine",
                    "attribute": "off",
                    "change": "more likely"
                },
                {
                    "type": "openpi_entity_gpt3",
                    "entity": "fee machine",
                    "attribute": "on",
                    "change": "less likely"
                },
                {
                    "type": "openpi_entity_gpt3",
                    "entity": "fee machine",
                    "attribute": "off",
                    "change": "more likely"
                },
                {
                    "type": "openpi_entity_gpt3",
                    "entity": "fee machine",
                    "attribute": "running",
                    "change": "less likely"
                },
                {
                    "type": "openpi_entity_gpt3",
                    "entity": "fee machine",
                    "attribute": "cool",
                    "change": "more likely"
                },
                {
                    "type": "openpi_entity_gpt3",
                    "entity": "fee machine",
                    "attribute": "warm",
                    "change": "less likely"
                }
            ],
            [
                {
                    "type": "step",
                    "step": "Power off the expresso machine"
                },
                {
                    "type": "entity",
                    "entity": "the coffee machine",
                    "attribute": "powered on",
                    "change": "less likely"
                },
                {
                    "type": "multihop",
                    "event": "An indicator light shines.",
                    "change": "less likely"
                },
                {
                    "type": "openpi_entity_gpt3",
                    "entity": "expresso machine",
                    "attribute": "cool",
                    "change": "more likely"
                },
                {
                    "type": "openpi_entity_gpt3",
                    "entity": "expresso machine",
                    "attribute": "warm",
                    "change": "less likely"
                },
                {
                    "type": "openpi_entity_gpt3",
                    "entity": "machine",
                    "attribute": "off",
                    "change": "more likely"
                },
                {
                    "type": "openpi_entity_gpt3",
                    "entity": "machine",
                    "attribute": "on",
                    "change": "less likely"
                },
                {
                    "type": "openpi_entity_gpt3",
                    "entity": "expresso machine",
                    "attribute": "off",
                    "change": "more likely"
                },
                {
                    "type": "openpi_entity_gpt3",
                    "entity": "expresso machine",
                    "attribute": "on",
                    "change": "less likely"
                },
                {
                    "type": "openpi_entity_gpt3",
                    "entity": "fee machine",
                    "attribute": "cool",
                    "change": "more likely"
                },
                {
                    "type": "openpi_entity_gpt3",
                    "entity": "fee machine",
                    "attribute": "warm",
                    "change": "less likely"
                },
                {
                    "type": "openpi_entity_gpt3",
                    "entity": "expresso machine",
                    "attribute": "off",
                    "change": "more likely"
                },
                {
                    "type": "openpi_entity_gpt3",
                    "entity": "expresso machine",
                    "attribute": "on",
                    "change": "less likely"
                }
            ]
        ]
    },
    "25": {
        "goal": "Bath your dog",
        "annotator": "Yue",
        "steps": [
            [
                {
                    "step": "Start."
                }
            ],
            [
                {
                    "type": "step",
                    "step": "Get the water temperature right."
                },
                {
                    "type": "openpi_entity_gpt3",
                    "entity": "water faucet",
                    "attribute": "on",
                    "change": "more likely"
                },
                {
                    "type": "openpi_entity_gpt3",
                    "entity": "water faucet",
                    "attribute": "off",
                    "change": "less likely"
                },
                {
                    "type": "openpi_entity_gpt3",
                    "entity": "water",
                    "attribute": "warm",
                    "change": "more likely"
                },
                {
                    "type": "openpi_entity_gpt3",
                    "entity": "water",
                    "attribute": "cold",
                    "change": "less likely"
                },
                {
                    "type": "openpi_entity_gpt3",
                    "entity": "water",
                    "attribute": "hot",
                    "change": "more likely"
                },
                {
                    "type": "openpi_entity_gpt3",
                    "entity": "water",
                    "attribute": "cold",
                    "change": "less likely"
                }
            ],
            [
                {
                    "type": "step",
                    "step": "Wet your dog's body with water."
                },
                {
                    "type": "entity",
                    "entity": "the dog",
                    "attribute": "wet",
                    "change": "more likely"
                },
                {
                    "type": "multihop",
                    "event": "I walk the dog.",
                    "change": "less likely"
                },
                {
                    "type": "multihop",
                    "event": "I hug the dog and water on my clothes.",
                    "change": "more likely"
                },
                {
                    "type": "openpi_entity_gpt3",
                    "entity": "water",
                    "attribute": "on dog",
                    "change": "more likely"
                },
                {
                    "type": "openpi_entity_gpt3",
                    "entity": "water",
                    "attribute": "in faucet",
                    "change": "less likely"
                },
                {
                    "type": "openpi_entity_gpt3",
                    "entity": "dog",
                    "attribute": "wet",
                    "change": "more likely"
                },
                {
                    "type": "openpi_entity_gpt3",
                    "entity": "dog",
                    "attribute": "dry",
                    "change": "less likely"
                },
                {
                    "type": "openpi_entity_gpt3",
                    "entity": "water",
                    "attribute": "on dog",
                    "change": "more likely"
                },
                {
                    "type": "openpi_entity_gpt3",
                    "entity": "water",
                    "attribute": "in pipes",
                    "change": "less likely"
                }
            ],
            [
                {
                    "type": "step",
                    "step": "Apply the shampoo."
                },
                {
                    "type": "entity",
                    "entity": "the shampoo",
                    "attribute": "on the dog's body",
                    "change": "more likely"
                },
                {
                    "type": "multihop",
                    "event": "Bubbles can be seen on the dog.",
                    "change": "more likely"
                },
                {
                    "type": "openpi_entity_gpt3",
                    "entity": "dog's coat",
                    "attribute": "wet",
                    "change": "more likely"
                },
                {
                    "type": "openpi_entity_gpt3",
                    "entity": "dog's coat",
                    "attribute": "dry",
                    "change": "less likely"
                },
                {
                    "type": "openpi_entity_gpt3",
                    "entity": "shampoo",
                    "attribute": "on dog",
                    "change": "more likely"
                },
                {
                    "type": "openpi_entity_gpt3",
                    "entity": "shampoo",
                    "attribute": "in bottle",
                    "change": "less likely"
                }
            ],
            [
                {
                    "type": "step",
                    "step": "Rinse your dog until the water from his fur runs clear."
                },
                {
                    "type": "entity",
                    "entity": "the shampoo",
                    "attribute": "on the dog's body",
                    "change": "less likely"
                },
                {
                    "type": "multihop",
                    "event": "Bubbles can be seen on the dog.",
                    "change": "less likely"
                },
                {
                    "type": "openpi_entity_gpt3",
                    "entity": "dog",
                    "attribute": "wet",
                    "change": "more likely"
                },
                {
                    "type": "openpi_entity_gpt3",
                    "entity": "dog",
                    "attribute": "dry",
                    "change": "less likely"
                },
                {
                    "type": "openpi_entity_gpt3",
                    "entity": "dog",
                    "attribute": "rinsed",
                    "change": "more likely"
                },
                {
                    "type": "openpi_entity_gpt3",
                    "entity": "dog",
                    "attribute": "wet",
                    "change": "less likely"
                },
                {
                    "type": "openpi_entity_gpt3",
                    "entity": "dog",
                    "attribute": "dry",
                    "change": "more likely"
                },
                {
                    "type": "openpi_entity_gpt3",
                    "entity": "dog",
                    "attribute": "wet",
                    "change": "less likely"
                },
                {
                    "type": "openpi_entity_gpt3",
                    "entity": "dog",
                    "attribute": "clean",
                    "change": "more likely"
                },
                {
                    "type": "openpi_entity_gpt3",
                    "entity": "dog",
                    "attribute": "dirty",
                    "change": "less likely"
                },
                {
                    "type": "openpi_entity_gpt3",
                    "entity": "shampoo",
                    "attribute": "in water",
                    "change": "more likely"
                },
                {
                    "type": "openpi_entity_gpt3",
                    "entity": "shampoo",
                    "attribute": "in bottle",
                    "change": "less likely"
                },
                {
                    "type": "openpi_entity_gpt3",
                    "entity": "dog",
                    "attribute": "dry",
                    "change": "more likely"
                },
                {
                    "type": "openpi_entity_gpt3",
                    "entity": "dog",
                    "attribute": "wet",
                    "change": "less likely"
                }
            ],
            [
                {
                    "type": "step",
                    "step": "Dry your dog."
                },
                {
                    "type": "entity",
                    "entity": "the dog",
                    "attribute": "wet",
                    "change": "less likely"
                },
                {
                    "type": "multihop",
                    "event": "I walk the dog.",
                    "change": "more likely"
                },
                {
                    "type": "multihop",
                    "event": "I hug the dog and water on my clothes.",
                    "change": "more likely"
                },
                {
                    "type": "openpi_entity_gpt3",
                    "entity": "towel",
                    "attribute": "on the dog",
                    "change": "more likely"
                },
                {
                    "type": "openpi_entity_gpt3",
                    "entity": "towel",
                    "attribute": "in the drawer",
                    "change": "less likely"
                },
                {
                    "type": "openpi_entity_gpt3",
                    "entity": "dog",
                    "attribute": "dry",
                    "change": "more likely"
                },
                {
                    "type": "openpi_entity_gpt3",
                    "entity": "dog",
                    "attribute": "wet",
                    "change": "less likely"
                },
                {
                    "type": "openpi_entity_gpt3",
                    "entity": "dog",
                    "attribute": "dry",
                    "change": "more likely"
                },
                {
                    "type": "openpi_entity_gpt3",
                    "entity": "dog",
                    "attribute": "wet",
                    "change": "less likely"
                },
                {
                    "type": "openpi_entity_gpt3",
                    "entity": "dog",
                    "attribute": "cool",
                    "change": "more likely"
                },
                {
                    "type": "openpi_entity_gpt3",
                    "entity": "dog",
                    "attribute": "warm",
                    "change": "less likely"
                },
                {
                    "type": "openpi_entity_gpt3",
                    "entity": "dog",
                    "attribute": "in the towel",
                    "change": "more likely"
                },
                {
                    "type": "openpi_entity_gpt3",
                    "entity": "dog",
                    "attribute": "in the bathroom",
                    "change": "less likely"
                }
            ],
            [
                {
                    "type": "step",
                    "step": "Give your dog a treat."
                },
                {
                    "type": "entity",
                    "entity": "the dog",
                    "attribute": "happy",
                    "change": "more likely"
                },
                {
                    "type": "multihop",
                    "event": "I walk the dog.",
                    "change": "more likely"
                },
                {
                    "type": "openpi_entity_gpt3",
                    "entity": "dog",
                    "attribute": "full of energy",
                    "change": "more likely"
                },
                {
                    "type": "openpi_entity_gpt3",
                    "entity": "dog",
                    "attribute": "thirsty",
                    "change": "less likely"
                },
                {
                    "type": "openpi_entity_gpt3",
                    "entity": "dog",
                    "attribute": "full",
                    "change": "more likely"
                },
                {
                    "type": "openpi_entity_gpt3",
                    "entity": "dog",
                    "attribute": "thirsty",
                    "change": "less likely"
                },
                {
                    "type": "openpi_entity_gpt3",
                    "entity": "treat",
                    "attribute": "on dog",
                    "change": "more likely"
                },
                {
                    "type": "openpi_entity_gpt3",
                    "entity": "treat",
                    "attribute": "in hand",
                    "change": "less likely"
                }
            ]
        ]
    },
    "27": {
        "goal": "Clean toilet bowl",
        "annotator": "Yue",
        "steps": [
            [
                {
                    "step": "Start."
                }
            ],
            [
                {
                    "type": "step",
                    "step": "Flush toilet."
                },
                {
                    "type": "openpi_entity_gpt3",
                    "entity": "flush",
                    "attribute": "on",
                    "change": "more likely"
                },
                {
                    "type": "openpi_entity_gpt3",
                    "entity": "flush",
                    "attribute": "off",
                    "change": "less likely"
                },
                {
                    "type": "openpi_entity_gpt3",
                    "entity": "toilet",
                    "attribute": "wet",
                    "change": "more likely"
                },
                {
                    "type": "openpi_entity_gpt3",
                    "entity": "toilet",
                    "attribute": "dry",
                    "change": "less likely"
                },
                {
                    "type": "openpi_entity_gpt3",
                    "entity": "water",
                    "attribute": "in toilet",
                    "change": "more likely"
                },
                {
                    "type": "openpi_entity_gpt3",
                    "entity": "water",
                    "attribute": "in pipes",
                    "change": "less likely"
                },
                {
                    "type": "openpi_entity_gpt3",
                    "entity": "toilet",
                    "attribute": "flushed",
                    "change": "more likely"
                },
                {
                    "type": "openpi_entity_gpt3",
                    "entity": "toilet",
                    "attribute": "dry",
                    "change": "less likely"
                },
                {
                    "type": "openpi_entity_gpt3",
                    "entity": "water",
                    "attribute": "in toilet",
                    "change": "more likely"
                },
                {
                    "type": "openpi_entity_gpt3",
                    "entity": "water",
                    "attribute": "in faucet",
                    "change": "less likely"
                }
            ],
            [
                {
                    "type": "step",
                    "step": "Pour 1/3 cup of bleach into the bowl."
                },
                {
                    "type": "entity",
                    "entity": "the bleach",
                    "attribute": "in the bowl",
                    "change": "more likely"
                },
                {
                    "type": "multihop",
                    "event": "Someone uses the toilet.",
                    "change": "less likely"
                },
                {
                    "type": "openpi_entity_gpt3",
                    "entity": "bowl",
                    "attribute": "full",
                    "change": "more likely"
                },
                {
                    "type": "openpi_entity_gpt3",
                    "entity": "bowl",
                    "attribute": "empty",
                    "change": "less likely"
                },
                {
                    "type": "openpi_entity_gpt3",
                    "entity": "bleach",
                    "attribute": "in bowl",
                    "change": "more likely"
                },
                {
                    "type": "openpi_entity_gpt3",
                    "entity": "bleach",
                    "attribute": "in bottle",
                    "change": "less likely"
                },
                {
                    "type": "openpi_entity_gpt3",
                    "entity": "bleach",
                    "attribute": "in bowl",
                    "change": "more likely"
                },
                {
                    "type": "openpi_entity_gpt3",
                    "entity": "bleach",
                    "attribute": "in container",
                    "change": "less likely"
                },
                {
                    "type": "openpi_entity_gpt3",
                    "entity": "bowl",
                    "attribute": "heavy",
                    "change": "more likely"
                },
                {
                    "type": "openpi_entity_gpt3",
                    "entity": "bowl",
                    "attribute": "light",
                    "change": "less likely"
                }
            ],
            [
                {
                    "type": "step",
                    "step": "Scrub the bowl with a toilet brush, making sure to get under the rim."
                },
                {
                    "type": "openpi_entity_gpt3",
                    "entity": "toilet brush",
                    "attribute": "",
                    "change": "more likely"
                },
                {
                    "type": "openpi_entity_gpt3",
                    "entity": "toilet brush",
                    "attribute": "clean",
                    "change": "less likely"
                },
                {
                    "type": "openpi_entity_gpt3",
                    "entity": "brush",
                    "attribute": "in the hand",
                    "change": "more likely"
                },
                {
                    "type": "openpi_entity_gpt3",
                    "entity": "brush",
                    "attribute": "in the drawer",
                    "change": "less likely"
                },
                {
                    "type": "openpi_entity_gpt3",
                    "entity": "rim",
                    "attribute": "clean",
                    "change": "more likely"
                },
                {
                    "type": "openpi_entity_gpt3",
                    "entity": "rim",
                    "attribute": "dirty",
                    "change": "less likely"
                },
                {
                    "type": "openpi_entity_gpt3",
                    "entity": "brush",
                    "attribute": "dirty",
                    "change": "more likely"
                },
                {
                    "type": "openpi_entity_gpt3",
                    "entity": "brush",
                    "attribute": "clean",
                    "change": "less likely"
                },
                {
                    "type": "openpi_entity_gpt3",
                    "entity": "toilet brush",
                    "attribute": "dirty",
                    "change": "more likely"
                },
                {
                    "type": "openpi_entity_gpt3",
                    "entity": "toilet brush",
                    "attribute": "clean",
                    "change": "less likely"
                }
            ],
            [
                {
                    "type": "step",
                    "step": "Wait 6 minutes for disinfecting. Don't allow pets or children near the toilet."
                },
                {
                    "type": "openpi_entity_gpt3",
                    "entity": "pets",
                    "attribute": "away from the toilet",
                    "change": "more likely"
                },
                {
                    "type": "openpi_entity_gpt3",
                    "entity": "pets",
                    "attribute": "near the toilet",
                    "change": "less likely"
                },
                {
                    "type": "openpi_entity_gpt3",
                    "entity": "children",
                    "attribute": "away from the toilet",
                    "change": "more likely"
                },
                {
                    "type": "openpi_entity_gpt3",
                    "entity": "children",
                    "attribute": "near the toilet",
                    "change": "less likely"
                }
            ],
            [
                {
                    "type": "step",
                    "step": "Flush the toilet again."
                },
                {
                    "type": "entity",
                    "entity": "the bleach",
                    "attribute": "in the bowl",
                    "change": "less likely"
                },
                {
                    "type": "multihop",
                    "event": "I use the toilet.",
                    "change": "more likely"
                },
                {
                    "type": "openpi_entity_gpt3",
                    "entity": "toilet",
                    "attribute": "wet",
                    "change": "more likely"
                },
                {
                    "type": "openpi_entity_gpt3",
                    "entity": "toilet",
                    "attribute": "dry",
                    "change": "less likely"
                },
                {
                    "type": "openpi_entity_gpt3",
                    "entity": "water",
                    "attribute": "in toilet",
                    "change": "more likely"
                },
                {
                    "type": "openpi_entity_gpt3",
                    "entity": "water",
                    "attribute": "in pipes",
                    "change": "less likely"
                }
            ]
        ]
    },
    "28": {
        "goal": "Dispose of Dog Poop",
        "annotator": "Yue",
        "steps": [
            [
                {
                    "step": "Start."
                }
            ],
            [
                {
                    "type": "step",
                    "step": "Pick up dog poop."
                },
                {
                    "type": "entity",
                    "entity": "my hand",
                    "attribute": "dirty",
                    "change": "more likely"
                },
                {
                    "type": "multihop",
                    "event": "I touch my face.",
                    "change": "less likely"
                },
                {
                    "type": "openpi_entity_gpt3",
                    "entity": "poop",
                    "attribute": "in the bag",
                    "change": "more likely"
                },
                {
                    "type": "openpi_entity_gpt3",
                    "entity": "poop",
                    "attribute": "on the ground",
                    "change": "less likely"
                },
                {
                    "type": "openpi_entity_gpt3",
                    "entity": "dog poop",
                    "attribute": "picked up",
                    "change": "more likely"
                },
                {
                    "type": "openpi_entity_gpt3",
                    "entity": "dog poop",
                    "attribute": "on the ground",
                    "change": "less likely"
                },
                {
                    "type": "openpi_entity_gpt3",
                    "entity": "poop",
                    "attribute": "picked up",
                    "change": "more likely"
                },
                {
                    "type": "openpi_entity_gpt3",
                    "entity": "poop",
                    "attribute": "on the ground",
                    "change": "less likely"
                },
                {
                    "type": "openpi_entity_gpt3",
                    "entity": "poop",
                    "attribute": "in bag",
                    "change": "more likely"
                },
                {
                    "type": "openpi_entity_gpt3",
                    "entity": "poop",
                    "attribute": "on ground",
                    "change": "less likely"
                },
                {
                    "type": "openpi_entity_gpt3",
                    "entity": "dog poop",
                    "attribute": "in the bag",
                    "change": "more likely"
                },
                {
                    "type": "openpi_entity_gpt3",
                    "entity": "dog poop",
                    "attribute": "on the ground",
                    "change": "less likely"
                }
            ],
            [
                {
                    "type": "step",
                    "step": "Place the dog poop in a plastic bag."
                },
                {
                    "type": "openpi_entity_gpt3",
                    "entity": "poop",
                    "attribute": "in bag",
                    "change": "more likely"
                },
                {
                    "type": "openpi_entity_gpt3",
                    "entity": "poop",
                    "attribute": "in dog's mouth",
                    "change": "less likely"
                },
                {
                    "type": "openpi_entity_gpt3",
                    "entity": "poop",
                    "attribute": "in bag",
                    "change": "more likely"
                },
                {
                    "type": "openpi_entity_gpt3",
                    "entity": "poop",
                    "attribute": "in ground",
                    "change": "less likely"
                },
                {
                    "type": "openpi_entity_gpt3",
                    "entity": "dog poop",
                    "attribute": "in the bag",
                    "change": "more likely"
                },
                {
                    "type": "openpi_entity_gpt3",
                    "entity": "dog poop",
                    "attribute": "in the ground",
                    "change": "less likely"
                }
            ],
            [
                {
                    "type": "step",
                    "step": "Tie up the bag neatly."
                },
                {
                    "type": "entity",
                    "entity": "the poop",
                    "attribute": "exposed to air",
                    "change": "less likely"
                },
                {
                    "type": "openpi_entity_gpt3",
                    "entity": "bag",
                    "attribute": "tied up",
                    "change": "more likely"
                },
                {
                    "type": "openpi_entity_gpt3",
                    "entity": "bag",
                    "attribute": "open",
                    "change": "less likely"
                },
                {
                    "type": "openpi_entity_gpt3",
                    "entity": "bag",
                    "attribute": "closed",
                    "change": "more likely"
                },
                {
                    "type": "openpi_entity_gpt3",
                    "entity": "bag",
                    "attribute": "open",
                    "change": "less likely"
                },
                {
                    "type": "openpi_entity_gpt3",
                    "entity": "bag",
                    "attribute": "tied",
                    "change": "more likely"
                },
                {
                    "type": "openpi_entity_gpt3",
                    "entity": "bag",
                    "attribute": "open",
                    "change": "less likely"
                }
            ],
            [
                {
                    "type": "step",
                    "step": "Put the bag in the trash can."
                },
                {
                    "type": "openpi_entity_gpt3",
                    "entity": "bag",
                    "attribute": "in trash can",
                    "change": "more likely"
                },
                {
                    "type": "openpi_entity_gpt3",
                    "entity": "bag",
                    "attribute": "in hand",
                    "change": "less likely"
                },
                {
                    "type": "openpi_entity_gpt3",
                    "entity": "bag",
                    "attribute": "in trash",
                    "change": "more likely"
                },
                {
                    "type": "openpi_entity_gpt3",
                    "entity": "bag",
                    "attribute": "in hand",
                    "change": "less likely"
                }
            ],
            [
                {
                    "type": "step",
                    "step": "Wash your hands thoroughly."
                },
                {
                    "type": "entity",
                    "entity": "my hand",
                    "attribute": "dirty",
                    "change": "less likely"
                },
                {
                    "type": "multihop",
                    "event": "I touch my face.",
                    "change": "more likely"
                },
                {
                    "type": "openpi_entity_gpt3",
                    "entity": "water",
                    "attribute": "in drain",
                    "change": "more likely"
                },
                {
                    "type": "openpi_entity_gpt3",
                    "entity": "water",
                    "attribute": "in pipes",
                    "change": "less likely"
                },
                {
                    "type": "openpi_entity_gpt3",
                    "entity": "water",
                    "attribute": "in sink",
                    "change": "more likely"
                },
                {
                    "type": "openpi_entity_gpt3",
                    "entity": "water",
                    "attribute": "in faucet",
                    "change": "less likely"
                },
                {
                    "type": "openpi_entity_gpt3",
                    "entity": "hands",
                    "attribute": "wet",
                    "change": "more likely"
                },
                {
                    "type": "openpi_entity_gpt3",
                    "entity": "hands",
                    "attribute": "dry",
                    "change": "less likely"
                },
                {
                    "type": "openpi_entity_gpt3",
                    "entity": "water",
                    "attribute": "in drain",
                    "change": "more likely"
                },
                {
                    "type": "openpi_entity_gpt3",
                    "entity": "water",
                    "attribute": "in faucet",
                    "change": "less likely"
                },
                {
                    "type": "openpi_entity_gpt3",
                    "entity": "hands",
                    "attribute": "clean",
                    "change": "more likely"
                },
                {
                    "type": "openpi_entity_gpt3",
                    "entity": "hands",
                    "attribute": "dirty",
                    "change": "less likely"
                }
            ]
        ]
    },
    "29": {
        "goal": "Clean and sanitize a cutting board",
        "annotator": "Yue",
        "steps": [
            [
                {
                    "step": "Start."
                }
            ],
            [
                {
                    "type": "step",
                    "step": "Scrub the board with warm water."
                },
                {
                    "type": "entity",
                    "entity": "the board",
                    "attribute": "wet",
                    "change": "more likely"
                },
                {
                    "type": "multihop",
                    "event": "I cut food on the board.",
                    "change": "less likely"
                },
                {
                    "type": "openpi_entity_gpt3",
                    "entity": "board",
                    "attribute": "clean",
                    "change": "more likely"
                },
                {
                    "type": "openpi_entity_gpt3",
                    "entity": "board",
                    "attribute": "dirty",
                    "change": "less likely"
                },
                {
                    "type": "openpi_entity_gpt3",
                    "entity": "board",
                    "attribute": "wet",
                    "change": "more likely"
                },
                {
                    "type": "openpi_entity_gpt3",
                    "entity": "board",
                    "attribute": "dry",
                    "change": "less likely"
                },
                {
                    "type": "openpi_entity_gpt3",
                    "entity": "water",
                    "attribute": "on the board",
                    "change": "more likely"
                },
                {
                    "type": "openpi_entity_gpt3",
                    "entity": "water",
                    "attribute": "in the pipes",
                    "change": "less likely"
                },
                {
                    "type": "openpi_entity_gpt3",
                    "entity": "water",
                    "attribute": "in sink",
                    "change": "more likely"
                },
                {
                    "type": "openpi_entity_gpt3",
                    "entity": "water",
                    "attribute": "in faucet",
                    "change": "less likely"
                },
                {
                    "type": "openpi_entity_gpt3",
                    "entity": "board",
                    "attribute": "warm",
                    "change": "more likely"
                },
                {
                    "type": "openpi_entity_gpt3",
                    "entity": "board",
                    "attribute": "cold",
                    "change": "less likely"
                },
                {
                    "type": "openpi_entity_gpt3",
                    "entity": "board",
                    "attribute": "in the sink",
                    "change": "more likely"
                },
                {
                    "type": "openpi_entity_gpt3",
                    "entity": "board",
                    "attribute": "in the hand",
                    "change": "less likely"
                },
                {
                    "type": "openpi_entity_gpt3",
                    "entity": "water",
                    "attribute": "in board",
                    "change": "more likely"
                },
                {
                    "type": "openpi_entity_gpt3",
                    "entity": "water",
                    "attribute": "in faucet",
                    "change": "less likely"
                },
                {
                    "type": "openpi_entity_gpt3",
                    "entity": "water",
                    "attribute": "in the sink",
                    "change": "more likely"
                },
                {
                    "type": "openpi_entity_gpt3",
                    "entity": "water",
                    "attribute": "in the pipes",
                    "change": "less likely"
                },
                {
                    "type": "openpi_entity_gpt3",
                    "entity": "board",
                    "attribute": "warm",
                    "change": "more likely"
                },
                {
                    "type": "openpi_entity_gpt3",
                    "entity": "board",
                    "attribute": "cool",
                    "change": "less likely"
                }
            ],
            [
                {
                    "type": "step",
                    "step": "Let the board air-dry for several hours."
                },
                {
                    "type": "entity",
                    "entity": "the board",
                    "attribute": "wet",
                    "change": "less likely"
                },
                {
                    "type": "multihop",
                    "event": "I cut food on the board.",
                    "change": "more likely"
                },
                {
                    "type": "openpi_entity_gpt3",
                    "entity": "the board",
                    "attribute": "drier",
                    "change": "more likely"
                },
                {
                    "type": "openpi_entity_gpt3",
                    "entity": "the board",
                    "attribute": "wetter",
                    "change": "less likely"
                },
                {
                    "type": "openpi_entity_gpt3",
                    "entity": "the board",
                    "attribute": "dry",
                    "change": "more likely"
                },
                {
                    "type": "openpi_entity_gpt3",
                    "entity": "the board",
                    "attribute": "wet",
                    "change": "less likely"
                },
                {
                    "type": "openpi_entity_gpt3",
                    "entity": "the board",
                    "attribute": "dry",
                    "change": "more likely"
                },
                {
                    "type": "openpi_entity_gpt3",
                    "entity": "the board",
                    "attribute": "wet",
                    "change": "less likely"
                },
                {
                    "type": "openpi_entity_gpt3",
                    "entity": "the board",
                    "attribute": "cool",
                    "change": "more likely"
                },
                {
                    "type": "openpi_entity_gpt3",
                    "entity": "the board",
                    "attribute": "warm",
                    "change": "less likely"
                }
            ],
            [
                {
                    "type": "step",
                    "step": "Sanitize and deodorize your cutting board with vinegar or a commercial, food-safe sanitizer."
                },
                {
                    "type": "entity",
                    "entity": "the board",
                    "attribute": "wet",
                    "change": "more likely"
                },
                {
                    "type": "entity",
                    "entity": "chemical materials",
                    "attribute": "on the board",
                    "change": "more likely"
                },
                {
                    "type": "multihop",
                    "event": "I cut food on the board.",
                    "change": "less likely"
                },
                {
                    "type": "openpi_entity_gpt3",
                    "entity": "cutting board",
                    "attribute": "wet",
                    "change": "more likely"
                },
                {
                    "type": "openpi_entity_gpt3",
                    "entity": "cutting board",
                    "attribute": "dry",
                    "change": "less likely"
                },
                {
                    "type": "openpi_entity_gpt3",
                    "entity": "cutting board",
                    "attribute": "vinegar/sanitizer scented",
                    "change": "more likely"
                },
                {
                    "type": "openpi_entity_gpt3",
                    "entity": "cutting board",
                    "attribute": "odorless",
                    "change": "less likely"
                },
                {
                    "type": "openpi_entity_gpt3",
                    "entity": "cutting board",
                    "attribute": "clean",
                    "change": "more likely"
                },
                {
                    "type": "openpi_entity_gpt3",
                    "entity": "cutting board",
                    "attribute": "dirty",
                    "change": "less likely"
                },
                {
                    "type": "openpi_entity_gpt3",
                    "entity": "vinegar",
                    "attribute": "on board",
                    "change": "more likely"
                },
                {
                    "type": "openpi_entity_gpt3",
                    "entity": "vinegar",
                    "attribute": "in bottle",
                    "change": "less likely"
                },
                {
                    "type": "openpi_entity_gpt3",
                    "entity": "sanitizer",
                    "attribute": "on board",
                    "change": "more likely"
                },
                {
                    "type": "openpi_entity_gpt3",
                    "entity": "sanitizer",
                    "attribute": "in bottle",
                    "change": "less likely"
                },
                {
                    "type": "openpi_entity_gpt3",
                    "entity": "board",
                    "attribute": "vinegar/sanitizer scented",
                    "change": "more likely"
                },
                {
                    "type": "openpi_entity_gpt3",
                    "entity": "board",
                    "attribute": "odorless",
                    "change": "less likely"
                }
            ],
            [
                {
                    "type": "step",
                    "step": "Let the board air-dry before placing it back in storage."
                },
                {
                    "type": "entity",
                    "entity": "the board",
                    "attribute": "wet",
                    "change": "less likely"
                },
                {
                    "type": "entity",
                    "entity": "chemical materials",
                    "attribute": "on the board",
                    "change": "less likely"
                },
                {
                    "type": "multihop",
                    "event": "I cut food on the board.",
                    "change": "more likely"
                },
                {
                    "type": "openpi_entity_gpt3",
                    "entity": "board",
                    "attribute": "in storage",
                    "change": "more likely"
                },
                {
                    "type": "openpi_entity_gpt3",
                    "entity": "board",
                    "attribute": "in hand",
                    "change": "less likely"
                },
                {
                    "type": "openpi_entity_gpt3",
                    "entity": "cutting board",
                    "attribute": "dry",
                    "change": "more likely"
                },
                {
                    "type": "openpi_entity_gpt3",
                    "entity": "cutting board",
                    "attribute": "wet",
                    "change": "less likely"
                },
                {
                    "type": "openpi_entity_gpt3",
                    "entity": "board",
                    "attribute": "in a cabinet",
                    "change": "more likely"
                },
                {
                    "type": "openpi_entity_gpt3",
                    "entity": "board",
                    "attribute": "in the open",
                    "change": "less likely"
                }
            ]
        ]
    },
    "30": {
        "goal": "Fly a Dual Line Kite",
        "annotator": "Yue",
        "steps": [
            [
                {
                    "step": "Start."
                }
            ],
            [
                {
                    "type": "step",
                    "step": "Assemble the kite inside."
                },
                {
                    "type": "openpi_entity_gpt3",
                    "entity": "kite",
                    "attribute": "on the ground",
                    "change": "more likely"
                },
                {
                    "type": "openpi_entity_gpt3",
                    "entity": "kite",
                    "attribute": "in the box",
                    "change": "less likely"
                },
                {
                    "type": "openpi_entity_gpt3",
                    "entity": "kite",
                    "attribute": "assembled",
                    "change": "more likely"
                },
                {
                    "type": "openpi_entity_gpt3",
                    "entity": "kite",
                    "attribute": "in the package",
                    "change": "less likely"
                }
            ],
            [
                {
                    "type": "step",
                    "step": "Stand with your back toward the wind."
                },
                {
                    "type": "openpi_entity_gpt3",
                    "entity": "person",
                    "attribute": "facing away from wind",
                    "change": "more likely"
                },
                {
                    "type": "openpi_entity_gpt3",
                    "entity": "person",
                    "attribute": "facing forward",
                    "change": "less likely"
                },
                {
                    "type": "openpi_entity_gpt3",
                    "entity": "person",
                    "attribute": "standing with back to wind",
                    "change": "more likely"
                },
                {
                    "type": "openpi_entity_gpt3",
                    "entity": "person",
                    "attribute": "on the ground",
                    "change": "less likely"
                },
                {
                    "type": "openpi_entity_gpt3",
                    "entity": "person",
                    "attribute": "standing with back to wind",
                    "change": "more likely"
                },
                {
                    "type": "openpi_entity_gpt3",
                    "entity": "person",
                    "attribute": "standing",
                    "change": "less likely"
                }
            ],
            [
                {
                    "type": "step",
                    "step": "Walk backward."
                },
                {
                    "type": "openpi_entity_gpt3",
                    "entity": "person",
                    "attribute": "walking backwards",
                    "change": "more likely"
                },
                {
                    "type": "openpi_entity_gpt3",
                    "entity": "person",
                    "attribute": "standing",
                    "change": "less likely"
                },
                {
                    "type": "openpi_entity_gpt3",
                    "entity": "feet",
                    "attribute": "moving backwards",
                    "change": "more likely"
                },
                {
                    "type": "openpi_entity_gpt3",
                    "entity": "feet",
                    "attribute": "still",
                    "change": "less likely"
                },
                {
                    "type": "openpi_entity_gpt3",
                    "entity": "person",
                    "attribute": "moving backwards",
                    "change": "more likely"
                },
                {
                    "type": "openpi_entity_gpt3",
                    "entity": "person",
                    "attribute": "at one spot",
                    "change": "less likely"
                }
            ],
            [
                {
                    "type": "step",
                    "step": "Pull gently on the lines."
                },
                {
                    "type": "entity",
                    "entity": "the kite",
                    "attribute": "in the sky",
                    "change": "more likely"
                },
                {
                    "type": "multihop",
                    "event": "I let go of the kite.",
                    "change": "less likely"
                },
                {
                    "type": "openpi_entity_gpt3",
                    "entity": "kite",
                    "attribute": "tied",
                    "change": "more likely"
                },
                {
                    "type": "openpi_entity_gpt3",
                    "entity": "kite",
                    "attribute": "loose",
                    "change": "less likely"
                },
                {
                    "type": "openpi_entity_gpt3",
                    "entity": "lines",
                    "attribute": "pulled",
                    "change": "more likely"
                },
                {
                    "type": "openpi_entity_gpt3",
                    "entity": "lines",
                    "attribute": "loose",
                    "change": "less likely"
                },
                {
                    "type": "openpi_entity_gpt3",
                    "entity": "kite",
                    "attribute": "pulled",
                    "change": "more likely"
                },
                {
                    "type": "openpi_entity_gpt3",
                    "entity": "kite",
                    "attribute": "loose",
                    "change": "less likely"
                },
                {
                    "type": "openpi_entity_gpt3",
                    "entity": "lines",
                    "attribute": "pulled",
                    "change": "more likely"
                },
                {
                    "type": "openpi_entity_gpt3",
                    "entity": "lines",
                    "attribute": "loose",
                    "change": "less likely"
                },
                {
                    "type": "openpi_entity_gpt3",
                    "entity": "hands",
                    "attribute": "tight",
                    "change": "more likely"
                },
                {
                    "type": "openpi_entity_gpt3",
                    "entity": "hands",
                    "attribute": "loose",
                    "change": "less likely"
                },
                {
                    "type": "openpi_entity_gpt3",
                    "entity": "lines",
                    "attribute": "tied",
                    "change": "more likely"
                },
                {
                    "type": "openpi_entity_gpt3",
                    "entity": "lines",
                    "attribute": "loose",
                    "change": "less likely"
                },
                {
                    "type": "openpi_entity_gpt3",
                    "entity": "lines",
                    "attribute": "on the kite",
                    "change": "more likely"
                },
                {
                    "type": "openpi_entity_gpt3",
                    "entity": "lines",
                    "attribute": "in the bag",
                    "change": "less likely"
                }
            ],
            [
                {
                    "type": "step",
                    "step": "Land your kite."
                },
                {
                    "type": "entity",
                    "entity": "the kite",
                    "attribute": "in the sky",
                    "change": "less likely"
                },
                {
                    "type": "multihop",
                    "event": "I let go of the kite.",
                    "change": "more likely"
                },
                {
                    "type": "openpi_entity_gpt3",
                    "entity": "kite",
                    "attribute": "on the ground",
                    "change": "more likely"
                },
                {
                    "type": "openpi_entity_gpt3",
                    "entity": "kite",
                    "attribute": "in the air",
                    "change": "less likely"
                }
            ]
        ]
    },
    "31": {
        "goal": "Place a Coin in the Door Hinge",
        "annotator": "Yue",
        "steps": [
            [
                {
                    "step": "Start."
                }
            ],
            [
                {
                    "type": "step",
                    "step": "Grab a coin."
                },
                {
                    "type": "openpi_entity_gpt3",
                    "entity": "coin",
                    "attribute": "in the hand",
                    "change": "more likely"
                },
                {
                    "type": "openpi_entity_gpt3",
                    "entity": "coin",
                    "attribute": "in the pocket",
                    "change": "less likely"
                },
                {
                    "type": "openpi_entity_gpt3",
                    "entity": "coin",
                    "attribute": "in hand",
                    "change": "more likely"
                },
                {
                    "type": "openpi_entity_gpt3",
                    "entity": "coin",
                    "attribute": "in pocket",
                    "change": "less likely"
                },
                {
                    "type": "openpi_entity_gpt3",
                    "entity": "hand",
                    "attribute": "holding a coin",
                    "change": "more likely"
                },
                {
                    "type": "openpi_entity_gpt3",
                    "entity": "hand",
                    "attribute": "empty",
                    "change": "less likely"
                }
            ],
            [
                {
                    "type": "step",
                    "step": "Open the door slightly."
                },
                {
                    "type": "entity",
                    "entity": "the door",
                    "attribute": "open",
                    "change": "more likely"
                },
                {
                    "type": "multihop",
                    "event": "A person enters through the door.",
                    "change": "more likely"
                },
                {
                    "type": "openpi_entity_gpt3",
                    "entity": "door",
                    "attribute": "slightly open",
                    "change": "more likely"
                },
                {
                    "type": "openpi_entity_gpt3",
                    "entity": "door",
                    "attribute": "closed",
                    "change": "less likely"
                },
                {
                    "type": "openpi_entity_gpt3",
                    "entity": "door",
                    "attribute": "slightly open",
                    "change": "more likely"
                },
                {
                    "type": "openpi_entity_gpt3",
                    "entity": "door",
                    "attribute": "closed",
                    "change": "less likely"
                }
            ],
            [
                {
                    "type": "step",
                    "step": "Insert the coin into the upper hinge."
                },
                {
                    "type": "entity",
                    "entity": "the coin",
                    "attribute": "in the hinge",
                    "change": "more likely"
                },
                {
                    "type": "multihop",
                    "event": "I fully open the door.",
                    "change": "less likely"
                },
                {
                    "type": "openpi_entity_gpt3",
                    "entity": "door",
                    "attribute": "open",
                    "change": "more likely"
                },
                {
                    "type": "openpi_entity_gpt3",
                    "entity": "door",
                    "attribute": "closed",
                    "change": "less likely"
                },
                {
                    "type": "openpi_entity_gpt3",
                    "entity": "coin",
                    "attribute": "inside door",
                    "change": "more likely"
                },
                {
                    "type": "openpi_entity_gpt3",
                    "entity": "coin",
                    "attribute": "outside door",
                    "change": "less likely"
                },
                {
                    "type": "openpi_entity_gpt3",
                    "entity": "coin",
                    "attribute": "inside hinge",
                    "change": "more likely"
                },
                {
                    "type": "openpi_entity_gpt3",
                    "entity": "coin",
                    "attribute": "outside hinge",
                    "change": "less likely"
                },
                {
                    "type": "openpi_entity_gpt3",
                    "entity": "hinge",
                    "attribute": "open",
                    "change": "more likely"
                },
                {
                    "type": "openpi_entity_gpt3",
                    "entity": "hinge",
                    "attribute": "closed",
                    "change": "less likely"
                }
            ],
            [
                {
                    "type": "step",
                    "step": "Secure the coin with tape, if necessary."
                },
                {
                    "type": "openpi_entity_gpt3",
                    "entity": "coin",
                    "attribute": "secure",
                    "change": "more likely"
                },
                {
                    "type": "openpi_entity_gpt3",
                    "entity": "coin",
                    "attribute": "vulnerable",
                    "change": "less likely"
                },
                {
                    "type": "openpi_entity_gpt3",
                    "entity": "coin",
                    "attribute": "taped",
                    "change": "more likely"
                },
                {
                    "type": "openpi_entity_gpt3",
                    "entity": "coin",
                    "attribute": "vulnerable",
                    "change": "less likely"
                },
                {
                    "type": "openpi_entity_gpt3",
                    "entity": "tape",
                    "attribute": "on coin",
                    "change": "more likely"
                },
                {
                    "type": "openpi_entity_gpt3",
                    "entity": "tape",
                    "attribute": "on roll",
                    "change": "less likely"
                }
            ],
            [
                {
                    "type": "step",
                    "step": "Try a coin in the lower hinge if this does not work."
                },
                {
                    "type": "openpi_entity_gpt3",
                    "entity": "lower hinge",
                    "attribute": "inserted",
                    "change": "more likely"
                },
                {
                    "type": "openpi_entity_gpt3",
                    "entity": "lower hinge",
                    "attribute": "uninserted",
                    "change": "less likely"
                },
                {
                    "type": "openpi_entity_gpt3",
                    "entity": "coin",
                    "attribute": "in lower hinge",
                    "change": "more likely"
                },
                {
                    "type": "openpi_entity_gpt3",
                    "entity": "coin",
                    "attribute": "in upper hinge",
                    "change": "less likely"
                }
            ]
        ]
    },
    "33": {
        "goal": "Frame a Puzzle",
        "annotator": "Weiqiu",
        "steps": [
            [
                {
                    "step": "Start."
                }
            ],
            [
                {
                    "type": "step",
                    "step": "Find a frame that fits your puzzle."
                },
                {
                    "type": "openpi_entity_gpt3",
                    "entity": "frame",
                    "attribute": "selected",
                    "change": "more likely"
                },
                {
                    "type": "openpi_entity_gpt3",
                    "entity": "frame",
                    "attribute": "considered",
                    "change": "less likely"
                },
                {
                    "type": "openpi_entity_gpt3",
                    "entity": "frame",
                    "attribute": "at home",
                    "change": "more likely"
                },
                {
                    "type": "openpi_entity_gpt3",
                    "entity": "frame",
                    "attribute": "at store",
                    "change": "less likely"
                },
                {
                    "type": "openpi_entity_gpt3",
                    "entity": "frame",
                    "attribute": "at home",
                    "change": "more likely"
                },
                {
                    "type": "openpi_entity_gpt3",
                    "entity": "frame",
                    "attribute": "in store",
                    "change": "less likely"
                }
            ],
            [
                {
                    "type": "step",
                    "step": "Cut a backing material to fit the frame."
                },
                {
                    "type": "openpi_entity_gpt3",
                    "entity": "material",
                    "attribute": "cut",
                    "change": "more likely"
                },
                {
                    "type": "openpi_entity_gpt3",
                    "entity": "material",
                    "attribute": "whole",
                    "change": "less likely"
                },
                {
                    "type": "openpi_entity_gpt3",
                    "entity": "frame",
                    "attribute": "cut",
                    "change": "more likely"
                },
                {
                    "type": "openpi_entity_gpt3",
                    "entity": "frame",
                    "attribute": "whole",
                    "change": "less likely"
                },
                {
                    "type": "openpi_entity_gpt3",
                    "entity": "backing material",
                    "attribute": "cut to fit frame",
                    "change": "more likely"
                },
                {
                    "type": "openpi_entity_gpt3",
                    "entity": "backing material",
                    "attribute": "whole",
                    "change": "less likely"
                },
                {
                    "type": "openpi_entity_gpt3",
                    "entity": "backing material",
                    "attribute": "cut",
                    "change": "more likely"
                },
                {
                    "type": "openpi_entity_gpt3",
                    "entity": "backing material",
                    "attribute": "whole",
                    "change": "less likely"
                },
                {
                    "type": "openpi_entity_gpt3",
                    "entity": "backing material",
                    "attribute": "cut",
                    "change": "more likely"
                },
                {
                    "type": "openpi_entity_gpt3",
                    "entity": "backing material",
                    "attribute": "whole",
                    "change": "less likely"
                },
                {
                    "type": "openpi_entity_gpt3",
                    "entity": "backing material",
                    "attribute": "cut",
                    "change": "more likely"
                },
                {
                    "type": "openpi_entity_gpt3",
                    "entity": "backing material",
                    "attribute": "whole",
                    "change": "less likely"
                }
            ],
            [
                {
                    "type": "step",
                    "step": "Slide a layer of wax paper under the puzzle."
                },
                {
                    "type": "openpi_entity_gpt3",
                    "entity": "puzzle",
                    "attribute": "under the wax paper",
                    "change": "more likely"
                },
                {
                    "type": "openpi_entity_gpt3",
                    "entity": "puzzle",
                    "attribute": "on the table",
                    "change": "less likely"
                },
                {
                    "type": "openpi_entity_gpt3",
                    "entity": "puzzle",
                    "attribute": "covered with wax paper",
                    "change": "more likely"
                },
                {
                    "type": "openpi_entity_gpt3",
                    "entity": "puzzle",
                    "attribute": "bare",
                    "change": "less likely"
                },
                {
                    "type": "openpi_entity_gpt3",
                    "entity": "puzzle",
                    "attribute": "protected",
                    "change": "more likely"
                },
                {
                    "type": "openpi_entity_gpt3",
                    "entity": "puzzle",
                    "attribute": "vulnerable",
                    "change": "less likely"
                },
                {
                    "type": "openpi_entity_gpt3",
                    "entity": "wax paper",
                    "attribute": "under the puzzle",
                    "change": "more likely"
                },
                {
                    "type": "openpi_entity_gpt3",
                    "entity": "wax paper",
                    "attribute": "on the counter",
                    "change": "less likely"
                },
                {
                    "type": "openpi_entity_gpt3",
                    "entity": "wax paper",
                    "attribute": "under the puzzle",
                    "change": "more likely"
                },
                {
                    "type": "openpi_entity_gpt3",
                    "entity": "wax paper",
                    "attribute": "on the table",
                    "change": "less likely"
                },
                {
                    "type": "openpi_entity_gpt3",
                    "entity": "puzzle",
                    "attribute": "covered",
                    "change": "more likely"
                },
                {
                    "type": "openpi_entity_gpt3",
                    "entity": "puzzle",
                    "attribute": "bare",
                    "change": "less likely"
                }
            ],
            [
                {
                    "type": "step",
                    "step": "Use a rolling pin to flatten the puzzle."
                },
                {
                    "type": "openpi_entity_gpt3",
                    "entity": "puzzle",
                    "attribute": "flat",
                    "change": "more likely"
                },
                {
                    "type": "openpi_entity_gpt3",
                    "entity": "puzzle",
                    "attribute": "round",
                    "change": "less likely"
                },
                {
                    "type": "openpi_entity_gpt3",
                    "entity": "puzzle",
                    "attribute": "flattened",
                    "change": "more likely"
                },
                {
                    "type": "openpi_entity_gpt3",
                    "entity": "puzzle",
                    "attribute": "round",
                    "change": "less likely"
                }
            ],
            [
                {
                    "type": "step",
                    "step": "Brush puzzle glue over the surface of the puzzle."
                },
                {
                    "type": "entity",
                    "entity": "front of the puzzle",
                    "attribute": "sticky",
                    "change": "more likely"
                },
                {
                    "type": "multihop",
                    "event": "My hands get sticky after I touch the puzzle.",
                    "change": "more likely"
                },
                {
                    "type": "openpi_entity_gpt3",
                    "entity": "brush",
                    "attribute": "wet",
                    "change": "more likely"
                },
                {
                    "type": "openpi_entity_gpt3",
                    "entity": "brush",
                    "attribute": "dry",
                    "change": "less likely"
                },
                {
                    "type": "openpi_entity_gpt3",
                    "entity": "glue",
                    "attribute": "on surface of puzzle",
                    "change": "more likely"
                },
                {
                    "type": "openpi_entity_gpt3",
                    "entity": "glue",
                    "attribute": "in container",
                    "change": "less likely"
                },
                {
                    "type": "openpi_entity_gpt3",
                    "entity": "glue",
                    "attribute": "on the puzzle",
                    "change": "more likely"
                },
                {
                    "type": "openpi_entity_gpt3",
                    "entity": "glue",
                    "attribute": "in container",
                    "change": "less likely"
                },
                {
                    "type": "openpi_entity_gpt3",
                    "entity": "glue",
                    "attribute": "on puzzle",
                    "change": "more likely"
                },
                {
                    "type": "openpi_entity_gpt3",
                    "entity": "glue",
                    "attribute": "in container",
                    "change": "less likely"
                },
                {
                    "type": "openpi_entity_gpt3",
                    "entity": "puzzle",
                    "attribute": "protected",
                    "change": "more likely"
                },
                {
                    "type": "openpi_entity_gpt3",
                    "entity": "puzzle",
                    "attribute": "vulnerable",
                    "change": "less likely"
                },
                {
                    "type": "openpi_entity_gpt3",
                    "entity": "puzzle",
                    "attribute": "wet",
                    "change": "more likely"
                },
                {
                    "type": "openpi_entity_gpt3",
                    "entity": "puzzle",
                    "attribute": "dry",
                    "change": "less likely"
                }
            ],
            [
                {
                    "type": "step",
                    "step": "Wait for the glue to dry."
                },
                {
                    "type": "entity",
                    "entity": "front of the puzzle",
                    "attribute": "sticky",
                    "change": "less likely"
                },
                {
                    "type": "multihop",
                    "event": "My hands get sticky after I touch the puzzle.",
                    "change": "less likely"
                },
                {
                    "type": "multihop",
                    "event": "The puzzle is taken apart.",
                    "change": "less likely"
                },
                {
                    "type": "openpi_entity_gpt3",
                    "entity": "puzzle",
                    "attribute": "dry",
                    "change": "more likely"
                },
                {
                    "type": "openpi_entity_gpt3",
                    "entity": "puzzle",
                    "attribute": "wet",
                    "change": "less likely"
                },
                {
                    "type": "openpi_entity_gpt3",
                    "entity": "glue",
                    "attribute": "dry",
                    "change": "more likely"
                },
                {
                    "type": "openpi_entity_gpt3",
                    "entity": "glue",
                    "attribute": "wet",
                    "change": "less likely"
                },
                {
                    "type": "openpi_entity_gpt3",
                    "entity": "puzzle",
                    "attribute": "dry",
                    "change": "more likely"
                },
                {
                    "type": "openpi_entity_gpt3",
                    "entity": "puzzle",
                    "attribute": "wet",
                    "change": "less likely"
                },
                {
                    "type": "openpi_entity_gpt3",
                    "entity": "surface",
                    "attribute": "dry",
                    "change": "more likely"
                },
                {
                    "type": "openpi_entity_gpt3",
                    "entity": "surface",
                    "attribute": "wet",
                    "change": "less likely"
                }
            ],
            [
                {
                    "type": "step",
                    "step": "Glue the puzzle to the backing material."
                },
                {
                    "type": "entity",
                    "entity": "back of the puzzle",
                    "attribute": "adhering to material",
                    "change": "more likely"
                },
                {
                    "type": "multihop",
                    "event": "I can see the back of the puzzle.",
                    "change": "less likely"
                },
                {
                    "type": "openpi_entity_gpt3",
                    "entity": "backing material",
                    "attribute": "wet",
                    "change": "more likely"
                },
                {
                    "type": "openpi_entity_gpt3",
                    "entity": "backing material",
                    "attribute": "dry",
                    "change": "less likely"
                },
                {
                    "type": "openpi_entity_gpt3",
                    "entity": "puzzle",
                    "attribute": "on the table top",
                    "change": "more likely"
                },
                {
                    "type": "openpi_entity_gpt3",
                    "entity": "puzzle",
                    "attribute": "on the table",
                    "change": "less likely"
                },
                {
                    "type": "openpi_entity_gpt3",
                    "entity": "puzzle",
                    "attribute": "attached",
                    "change": "more likely"
                },
                {
                    "type": "openpi_entity_gpt3",
                    "entity": "puzzle",
                    "attribute": "separate",
                    "change": "less likely"
                },
                {
                    "type": "openpi_entity_gpt3",
                    "entity": "puzzle",
                    "attribute": "on the backing material",
                    "change": "more likely"
                },
                {
                    "type": "openpi_entity_gpt3",
                    "entity": "puzzle",
                    "attribute": "on the table",
                    "change": "less likely"
                },
                {
                    "type": "openpi_entity_gpt3",
                    "entity": "puzzle",
                    "attribute": "dry",
                    "change": "more likely"
                },
                {
                    "type": "openpi_entity_gpt3",
                    "entity": "puzzle",
                    "attribute": "wet",
                    "change": "less likely"
                }
            ],
            [
                {
                    "type": "step",
                    "step": "Let the puzzle dry for at least 24 hours, weighing it down if necessary."
                },
                {
                    "type": "openpi_entity_gpt3",
                    "entity": "puzzle",
                    "attribute": "dry",
                    "change": "more likely"
                },
                {
                    "type": "openpi_entity_gpt3",
                    "entity": "puzzle",
                    "attribute": "wet",
                    "change": "less likely"
                },
                {
                    "type": "openpi_entity_gpt3",
                    "entity": "puzzle",
                    "attribute": "dry",
                    "change": "more likely"
                },
                {
                    "type": "openpi_entity_gpt3",
                    "entity": "puzzle",
                    "attribute": "wet",
                    "change": "less likely"
                },
                {
                    "type": "openpi_entity_gpt3",
                    "entity": "puzzle",
                    "attribute": "dry",
                    "change": "more likely"
                },
                {
                    "type": "openpi_entity_gpt3",
                    "entity": "puzzle",
                    "attribute": "wet",
                    "change": "less likely"
                },
                {
                    "type": "openpi_entity_gpt3",
                    "entity": "backing material",
                    "attribute": "dry",
                    "change": "more likely"
                },
                {
                    "type": "openpi_entity_gpt3",
                    "entity": "backing material",
                    "attribute": "wet",
                    "change": "less likely"
                }
            ],
            [
                {
                    "type": "step",
                    "step": "Frame the puzzle."
                },
                {
                    "type": "openpi_entity_gpt3",
                    "entity": "frame",
                    "attribute": "filled",
                    "change": "more likely"
                },
                {
                    "type": "openpi_entity_gpt3",
                    "entity": "frame",
                    "attribute": "empty",
                    "change": "less likely"
                },
                {
                    "type": "openpi_entity_gpt3",
                    "entity": "frame",
                    "attribute": "on the table",
                    "change": "more likely"
                },
                {
                    "type": "openpi_entity_gpt3",
                    "entity": "frame",
                    "attribute": "in the shop",
                    "change": "less likely"
                },
                {
                    "type": "openpi_entity_gpt3",
                    "entity": "frame",
                    "attribute": "full",
                    "change": "more likely"
                },
                {
                    "type": "openpi_entity_gpt3",
                    "entity": "frame",
                    "attribute": "empty",
                    "change": "less likely"
                },
                {
                    "type": "openpi_entity_gpt3",
                    "entity": "frame",
                    "attribute": "heavy",
                    "change": "more likely"
                },
                {
                    "type": "openpi_entity_gpt3",
                    "entity": "frame",
                    "attribute": "light",
                    "change": "less likely"
                },
                {
                    "type": "openpi_entity_gpt3",
                    "entity": "puzzle",
                    "attribute": "framed",
                    "change": "more likely"
                },
                {
                    "type": "openpi_entity_gpt3",
                    "entity": "puzzle",
                    "attribute": "loose",
                    "change": "less likely"
                },
                {
                    "type": "openpi_entity_gpt3",
                    "entity": "puzzle",
                    "attribute": "on the frame",
                    "change": "more likely"
                },
                {
                    "type": "openpi_entity_gpt3",
                    "entity": "puzzle",
                    "attribute": "loose",
                    "change": "less likely"
                },
                {
                    "type": "openpi_entity_gpt3",
                    "entity": "frame",
                    "attribute": "filled with puzzle",
                    "change": "more likely"
                },
                {
                    "type": "openpi_entity_gpt3",
                    "entity": "frame",
                    "attribute": "empty",
                    "change": "less likely"
                },
                {
                    "type": "openpi_entity_gpt3",
                    "entity": "puzzle",
                    "attribute": "in the frame",
                    "change": "more likely"
                },
                {
                    "type": "openpi_entity_gpt3",
                    "entity": "puzzle",
                    "attribute": "on the table",
                    "change": "less likely"
                }
            ]
        ]
    },
    "35": {
        "goal": "Set up a tent",
        "annotator": "Weiqiu",
        "steps": [
            [
                {
                    "step": "Start."
                }
            ],
            [
                {
                    "type": "step",
                    "step": "Lay a tarp down before putting up your tent."
                },
                {
                    "type": "openpi_entity_gpt3",
                    "entity": "tarp",
                    "attribute": "on the ground",
                    "change": "more likely"
                },
                {
                    "type": "openpi_entity_gpt3",
                    "entity": "tarp",
                    "attribute": "in the shed",
                    "change": "less likely"
                },
                {
                    "type": "openpi_entity_gpt3",
                    "entity": "tarp",
                    "attribute": "up",
                    "change": "more likely"
                },
                {
                    "type": "openpi_entity_gpt3",
                    "entity": "tarp",
                    "attribute": "down",
                    "change": "less likely"
                },
                {
                    "type": "openpi_entity_gpt3",
                    "entity": "ground",
                    "attribute": "covered",
                    "change": "more likely"
                },
                {
                    "type": "openpi_entity_gpt3",
                    "entity": "ground",
                    "attribute": "bare",
                    "change": "less likely"
                },
                {
                    "type": "openpi_entity_gpt3",
                    "entity": "tent",
                    "attribute": "on the ground",
                    "change": "more likely"
                },
                {
                    "type": "openpi_entity_gpt3",
                    "entity": "tent",
                    "attribute": "in the tent bag",
                    "change": "less likely"
                }
            ],
            [
                {
                    "type": "step",
                    "step": "Lay out and account for all the components of your tent."
                },
                {
                    "type": "openpi_entity_gpt3",
                    "entity": "components",
                    "attribute": "laid out",
                    "change": "more likely"
                },
                {
                    "type": "openpi_entity_gpt3",
                    "entity": "components",
                    "attribute": "in their place",
                    "change": "less likely"
                },
                {
                    "type": "openpi_entity_gpt3",
                    "entity": "tent stakes",
                    "attribute": "laid out",
                    "change": "more likely"
                },
                {
                    "type": "openpi_entity_gpt3",
                    "entity": "tent stakes",
                    "attribute": "in the closet",
                    "change": "less likely"
                },
                {
                    "type": "openpi_entity_gpt3",
                    "entity": "poles",
                    "attribute": "laid out",
                    "change": "more likely"
                },
                {
                    "type": "openpi_entity_gpt3",
                    "entity": "poles",
                    "attribute": "in the closet",
                    "change": "less likely"
                },
                {
                    "type": "openpi_entity_gpt3",
                    "entity": "tarp",
                    "attribute": "laid out",
                    "change": "more likely"
                },
                {
                    "type": "openpi_entity_gpt3",
                    "entity": "tarp",
                    "attribute": "in the closet",
                    "change": "less likely"
                },
                {
                    "type": "openpi_entity_gpt3",
                    "entity": "tent",
                    "attribute": "laid out",
                    "change": "more likely"
                },
                {
                    "type": "openpi_entity_gpt3",
                    "entity": "tent",
                    "attribute": "in the shed",
                    "change": "less likely"
                },
                {
                    "type": "openpi_entity_gpt3",
                    "entity": "tent",
                    "attribute": "laid out",
                    "change": "more likely"
                },
                {
                    "type": "openpi_entity_gpt3",
                    "entity": "tent",
                    "attribute": "in the closet",
                    "change": "less likely"
                },
                {
                    "type": "openpi_entity_gpt3",
                    "entity": "tent components",
                    "attribute": "laid out",
                    "change": "more likely"
                },
                {
                    "type": "openpi_entity_gpt3",
                    "entity": "tent components",
                    "attribute": "in a pile",
                    "change": "less likely"
                }
            ],
            [
                {
                    "type": "step",
                    "step": "Lay your tent onto the tarp."
                },
                {
                    "type": "openpi_entity_gpt3",
                    "entity": "tent",
                    "attribute": "attached",
                    "change": "more likely"
                },
                {
                    "type": "openpi_entity_gpt3",
                    "entity": "tent",
                    "attribute": "loose",
                    "change": "less likely"
                },
                {
                    "type": "openpi_entity_gpt3",
                    "entity": "tent",
                    "attribute": "on tarp",
                    "change": "more likely"
                },
                {
                    "type": "openpi_entity_gpt3",
                    "entity": "tent",
                    "attribute": "on ground",
                    "change": "less likely"
                },
                {
                    "type": "openpi_entity_gpt3",
                    "entity": "tarp",
                    "attribute": "covered",
                    "change": "more likely"
                },
                {
                    "type": "openpi_entity_gpt3",
                    "entity": "tarp",
                    "attribute": "bare",
                    "change": "less likely"
                },
                {
                    "type": "openpi_entity_gpt3",
                    "entity": "tarp",
                    "attribute": "on tent",
                    "change": "more likely"
                },
                {
                    "type": "openpi_entity_gpt3",
                    "entity": "tarp",
                    "attribute": "on ground",
                    "change": "less likely"
                }
            ],
            [
                {
                    "type": "step",
                    "step": "Connect your tent poles."
                },
                {
                    "type": "openpi_entity_gpt3",
                    "entity": "tent poles",
                    "attribute": "attached",
                    "change": "more likely"
                },
                {
                    "type": "openpi_entity_gpt3",
                    "entity": "tent poles",
                    "attribute": "loose",
                    "change": "less likely"
                },
                {
                    "type": "openpi_entity_gpt3",
                    "entity": "tent poles",
                    "attribute": "connected",
                    "change": "more likely"
                },
                {
                    "type": "openpi_entity_gpt3",
                    "entity": "tent poles",
                    "attribute": "separate",
                    "change": "less likely"
                },
                {
                    "type": "openpi_entity_gpt3",
                    "entity": "tent",
                    "attribute": "connected",
                    "change": "more likely"
                },
                {
                    "type": "openpi_entity_gpt3",
                    "entity": "tent",
                    "attribute": "unconnected",
                    "change": "less likely"
                },
                {
                    "type": "openpi_entity_gpt3",
                    "entity": "tent poles",
                    "attribute": "in tent",
                    "change": "more likely"
                },
                {
                    "type": "openpi_entity_gpt3",
                    "entity": "tent poles",
                    "attribute": "on ground",
                    "change": "less likely"
                },
                {
                    "type": "openpi_entity_gpt3",
                    "entity": "tent poles",
                    "attribute": "connected",
                    "change": "more likely"
                },
                {
                    "type": "openpi_entity_gpt3",
                    "entity": "tent poles",
                    "attribute": "separate",
                    "change": "less likely"
                }
            ],
            [
                {
                    "type": "step",
                    "step": "Insert tent poles into the corresponding flaps in the tent."
                },
                {
                    "type": "entity",
                    "entity": "the tent poles",
                    "attribute": "upright",
                    "change": "more likely"
                },
                {
                    "type": "multihop",
                    "event": "The poles can support the weight of a tent.",
                    "change": "more likely"
                },
                {
                    "type": "openpi_entity_gpt3",
                    "entity": "tent poles",
                    "attribute": "inserted into the tent flaps",
                    "change": "more likely"
                },
                {
                    "type": "openpi_entity_gpt3",
                    "entity": "tent poles",
                    "attribute": "on the ground",
                    "change": "less likely"
                },
                {
                    "type": "openpi_entity_gpt3",
                    "entity": "tent poles",
                    "attribute": "inside of tent",
                    "change": "more likely"
                },
                {
                    "type": "openpi_entity_gpt3",
                    "entity": "tent poles",
                    "attribute": "outside of tent",
                    "change": "less likely"
                },
                {
                    "type": "openpi_entity_gpt3",
                    "entity": "tent poles",
                    "attribute": "inserted into tent",
                    "change": "more likely"
                },
                {
                    "type": "openpi_entity_gpt3",
                    "entity": "tent poles",
                    "attribute": "separate from tent",
                    "change": "less likely"
                },
                {
                    "type": "openpi_entity_gpt3",
                    "entity": "tent poles",
                    "attribute": "inserted into the tent",
                    "change": "more likely"
                },
                {
                    "type": "openpi_entity_gpt3",
                    "entity": "tent poles",
                    "attribute": "on the ground",
                    "change": "less likely"
                }
            ],
            [
                {
                    "type": "step",
                    "step": "Raise the tent."
                },
                {
                    "type": "entity",
                    "entity": "tent",
                    "attribute": "raised",
                    "change": "more likely"
                },
                {
                    "type": "multihop",
                    "event": "A person walks under the tent.",
                    "change": "more likely"
                },
                {
                    "type": "openpi_entity_gpt3",
                    "entity": "tent",
                    "attribute": "higher",
                    "change": "more likely"
                },
                {
                    "type": "openpi_entity_gpt3",
                    "entity": "tent",
                    "attribute": "lower",
                    "change": "less likely"
                },
                {
                    "type": "openpi_entity_gpt3",
                    "entity": "tent poles",
                    "attribute": "in tent",
                    "change": "more likely"
                },
                {
                    "type": "openpi_entity_gpt3",
                    "entity": "tent poles",
                    "attribute": "out of tent",
                    "change": "less likely"
                },
                {
                    "type": "openpi_entity_gpt3",
                    "entity": "tent",
                    "attribute": "higher",
                    "change": "more likely"
                },
                {
                    "type": "openpi_entity_gpt3",
                    "entity": "tent",
                    "attribute": "lower",
                    "change": "less likely"
                },
                {
                    "type": "openpi_entity_gpt3",
                    "entity": "tarp",
                    "attribute": "higher",
                    "change": "more likely"
                },
                {
                    "type": "openpi_entity_gpt3",
                    "entity": "tarp",
                    "attribute": "lower",
                    "change": "less likely"
                },
                {
                    "type": "openpi_entity_gpt3",
                    "entity": "tent",
                    "attribute": "higher",
                    "change": "more likely"
                },
                {
                    "type": "openpi_entity_gpt3",
                    "entity": "tent",
                    "attribute": "lower",
                    "change": "less likely"
                },
                {
                    "type": "openpi_entity_gpt3",
                    "entity": "poles",
                    "attribute": "in tent",
                    "change": "more likely"
                },
                {
                    "type": "openpi_entity_gpt3",
                    "entity": "poles",
                    "attribute": "out of tent",
                    "change": "less likely"
                }
            ],
            [
                {
                    "type": "step",
                    "step": "Stake the tent to the ground."
                },
                {
                    "type": "entity",
                    "entity": "the tent",
                    "attribute": "fixated to the ground",
                    "change": "more likely"
                },
                {
                    "type": "multihop",
                    "event": "Wind blows the tent away.",
                    "change": "less likely"
                },
                {
                    "type": "openpi_entity_gpt3",
                    "entity": "tent",
                    "attribute": "staked",
                    "change": "more likely"
                },
                {
                    "type": "openpi_entity_gpt3",
                    "entity": "tent",
                    "attribute": "loose",
                    "change": "less likely"
                },
                {
                    "type": "openpi_entity_gpt3",
                    "entity": "tent",
                    "attribute": "staked",
                    "change": "more likely"
                },
                {
                    "type": "openpi_entity_gpt3",
                    "entity": "tent",
                    "attribute": "on ground",
                    "change": "less likely"
                },
                {
                    "type": "openpi_entity_gpt3",
                    "entity": "tent stakes",
                    "attribute": "in the ground",
                    "change": "more likely"
                },
                {
                    "type": "openpi_entity_gpt3",
                    "entity": "tent stakes",
                    "attribute": "in the bag",
                    "change": "less likely"
                },
                {
                    "type": "openpi_entity_gpt3",
                    "entity": "ground",
                    "attribute": "staked",
                    "change": "more likely"
                },
                {
                    "type": "openpi_entity_gpt3",
                    "entity": "ground",
                    "attribute": "bare",
                    "change": "less likely"
                },
                {
                    "type": "openpi_entity_gpt3",
                    "entity": "tent",
                    "attribute": "in air",
                    "change": "more likely"
                },
                {
                    "type": "openpi_entity_gpt3",
                    "entity": "tent",
                    "attribute": "on ground",
                    "change": "less likely"
                },
                {
                    "type": "openpi_entity_gpt3",
                    "entity": "stakes",
                    "attribute": "in the ground",
                    "change": "more likely"
                },
                {
                    "type": "openpi_entity_gpt3",
                    "entity": "stakes",
                    "attribute": "in the bag",
                    "change": "less likely"
                }
            ],
            [
                {
                    "type": "step",
                    "step": "Add on the rain fly."
                },
                {
                    "type": "entity",
                    "entity": "the tent",
                    "attribute": "covered with a rain fly",
                    "change": "more likely"
                },
                {
                    "type": "multihop",
                    "event": "The tent gets wet inside if it rains.",
                    "change": "less likely"
                },
                {
                    "type": "openpi_entity_gpt3",
                    "entity": "tent",
                    "attribute": "covered",
                    "change": "more likely"
                },
                {
                    "type": "openpi_entity_gpt3",
                    "entity": "tent",
                    "attribute": "bare",
                    "change": "less likely"
                },
                {
                    "type": "openpi_entity_gpt3",
                    "entity": "rain fly",
                    "attribute": "on the tent",
                    "change": "more likely"
                },
                {
                    "type": "openpi_entity_gpt3",
                    "entity": "rain fly",
                    "attribute": "off the tent",
                    "change": "less likely"
                },
                {
                    "type": "openpi_entity_gpt3",
                    "entity": "tent",
                    "attribute": "protected",
                    "change": "more likely"
                },
                {
                    "type": "openpi_entity_gpt3",
                    "entity": "tent",
                    "attribute": "vulnerable",
                    "change": "less likely"
                },
                {
                    "type": "openpi_entity_gpt3",
                    "entity": "tent",
                    "attribute": "now protected",
                    "change": "more likely"
                },
                {
                    "type": "openpi_entity_gpt3",
                    "entity": "tent",
                    "attribute": "bare",
                    "change": "less likely"
                },
                {
                    "type": "openpi_entity_gpt3",
                    "entity": "rain fly",
                    "attribute": "on the tent",
                    "change": "more likely"
                },
                {
                    "type": "openpi_entity_gpt3",
                    "entity": "rain fly",
                    "attribute": "on the ground",
[truncated: 202,335 more chars]
