# Supplementary material
Source: ML conference proceedings conference paper supplement (https://aclanthology.org/2023.findings-eacl.31)
Supplement: dataset [file 2023.findings-eacl.31.dataset.zip › causal_reasoning_of_entities_and_events/gpt3/legacy_trials/weiqiu1.0/0hop-predictions-test-formatted.jsonl]

{"id": "Clean up kitchen counter|1", "answers": ["state of hands was bare before and covered afterwards", "location of rubber gloves was in the drawer before and on the hands afterwards", "location of rubber gloves was in drawer before and on hands afterwards", "location of rubber gloves was in drawer before and on hands afterwards", "location of rubber gloves was in drawer before and on hands afterwards", "state of hands was bare before and covered afterwards", "location of rubber gloves was in drawer before and on hands afterwards", "location of rubber gloves was in drawer before and on hands afterwards", "location of rubber gloves was in drawer before and on hands afterwards"]}
{"id": "Clean up kitchen counter|2", "answers": ["location of towels was in the linen closet before and on the table afterwards", "location of towels was in the linen closet before and on the table afterwards", "location of wipes was in the linen closet before and on the table afterwards", "location of towels was in the linen closet before and on the table afterwards", "location of wipes was in the linen closet before and on the table afterwards", "location of towels was in the linen closet before and on the table afterwards", "location of wipes was in the linen closet before and on the table afterwards", "location of towels was in the linen closet before and on the table afterwards", "location of wipes was in the linen closet before and on the table afterwards", "location of towels was in the linen closet before and on the table afterwards", "location of wipes was in the linen closet before and on the table afterwards", "location of towels was in the linen closet before and on the table afterwards"]}
{"id": "Clean up kitchen counter|3", "answers": ["cleanness of counter was dirty before and clean afterwards", "location of wipes was in the drawer before and on the counter afterwards", "location of wipes was in the drawer before and on the counter afterwards", "cleanness of counter was dirty before and clean afterwards", "location of wipes was in drawer before and on counter afterwards", "moisture of counter was dry before and wet afterwards", "cleanness of counter was dirty before and clean afterwards", "location of wipes was in drawer before and on counter afterwards", "cleanness of counter was dirty before and clean afterwards", "location of wipes was in drawer before and on counter afterwards"]}
{"id": "Clean up kitchen counter|4", "answers": ["cleanness of counter was dirty before and clean afterwards", "location of towels was in drawer before and on counter afterwards", "location of towels was in drawer before and on counter afterwards", "cleanness of counter was dirty before and clean afterwards", "location of towels was in drawer before and on counter afterwards", "location of towels was in drawer before and on counter afterwards", "cleanness of counter was dirty before and clean afterwards", "location of towels was in drawer before and on counter afterwards", "location of wipes was in drawer before and on counter afterwards", "cleanness of counter was dirty before and clean afterwards", "location of wipes was in drawer before and on counter afterwards"]}
{"id": "Clean up kitchen counter|5", "answers": ["moisture of kitchen counter was wet before and dry afterwards", "wetness of kitchen counter was wet before and dry afterwards", "wetness of kitchen counter was wet before and dry afterwards", "wetness of kitchen counter was wet before and dry afterwards", "wetness of kitchen counter was wet before and dry afterwards", "location of towels was on the table before and on the kitchen counter afterwards", "location of towels was in the closet before and on the kitchen counter afterwards", "dryness of kitchen counter was wet before and dry afterwards"]}
{"id": "Write an essay|1", "answers": ["knowledge of topic was unknown before and known afterwards", "state of topic was unselected before and selected afterwards", "state of topic was unselected before and selected afterwards", "state of topic was unselected before and selected afterwards"]}
{"id": "Write an essay|2", "answers": ["state of outline was unmade before and made afterwards", "state of outline was incomplete before and complete afterwards", "state of essay was unstructured before and written afterwards", "state of outline was absent before and created afterwards", "state of essay was unstructured before and written afterwards"]}
{"id": "Write an essay|3", "answers": ["state of each section was unfollowed before and followed afterwards", "state of outline was absent before and followed afterwards", "state of each section was unexpanded before and expanded afterwards", "state of outline was absent before and followed afterwards", "state of paragraphs was unstructured before and structured afterwards", "state of paragraphs was unstructured before and expanded afterwards"]}
{"id": "Write an essay|4", "answers": ["state of essay was unwritten before and written afterwards", "state of essay was unwritten before and written afterwards", "state of draft was unwritten before and written afterwards", "state of essay was unwritten before and read afterwards", "state of essay was unwritten before and read afterwards"]}
{"id": "Write an essay|5", "answers": ["state of essay was unapproved before and approved afterwards", "state of essay was unreviewed before and reviewed afterwards", "state of essay was unreviewed before and reviewed afterwards", "state of essay was unreviewed before and submitted afterwards", "state of essay was unapproved before and approved afterwards", "state of essay was unneeded before and needed afterwards", "state of essay was unneeded before and needed afterwards"]}
{"id": "Apply for a chess tournament|1", "answers": ["knowledge of tournaments was unchecked before and checked afterwards", "state of chess action website was unvisited before and visited afterwards", "state of chess action website was unchecked before and checked afterwards", "state of tournaments was unselected before and selected afterwards", "state of chess action website was unvisited before and visited afterwards"]}
{"id": "Apply for a chess tournament|2", "answers": ["knowledge of dates was unchecked before and checked afterwards", "availability of dates was unavailable before and available afterwards", "availability of dates was unavailable before and available afterwards"]}
{"id": "Apply for a chess tournament|3", "answers": ["state of dates was unselected before and selected afterwards", "state of application was incomplete before and complete afterwards", "state of application was unprocessed before and processed afterwards", "state of dates was unselected before and selected afterwards", "state of application was unprocessed before and processed afterwards"]}
{"id": "Apply for a chess tournament|4", "answers": ["state of email was unopened before and opened afterwards", "state of application was considered before and accepted afterwards", "state of application was considered before and accepted afterwards", "state of email was unconfirmed before and confirmed afterwards", "state of application was considered before and accepted afterwards", "state of application was considered before and accepted afterwards"]}
{"id": "Mow the lawn|1", "answers": ["state of lawn mower was unset up before and set up afterwards", "state of lawn mower was unstarted before and started afterwards", "state of lawn mower was unplugged before and plugged in afterwards", "electric conductivity of lawn mower was turned off before and turned on afterwards", "location of plug was in the ground before and in the socket afterwards", "state of lawn mower was unplugged before and plugged in afterwards", "location of plug was in the ground before and in the socket afterwards", "state of lawn mower was unplugged before and plugged in afterwards", "location of plug was in the ground before and in the socket afterwards", "state of lawn mower was unstarted before and started afterwards"]}
{"id": "Mow the lawn|2", "answers": ["state of grass was uncut before and cut afterwards", "state of lawn was uncut before and mowed afterwards", "state of grass was uncut before and cut afterwards", "state of lawn was uncut before and mowed afterwards", "state of lawn was uncut before and cut afterwards", "state of lawn was uncut before and mowed afterwards"]}
{"id": "Mow the lawn|3", "answers": ["state of lawn was unmowed before and mowed afterwards", "state of lawn was unmowed before and mowed afterwards", "state of lawn was unmowed before and mowed afterwards"]}
{"id": "Heat pancake|1", "answers": ["location of pancake was in fridge before and on plate afterwards", "location of pancake was in fridge before and on plate afterwards", "location of plate was in the cupboard before and on the counter afterwards", "location of plate was in the cupboard before and on the table afterwards", "location of pancake was in fridge before and on plate afterwards", "location of plate was in cupboard before and on the counter afterwards", "location of pancake was in fridge before and on plate afterwards", "location of plate was in cupboard before and on the counter afterwards", "location of pancake was in fridge before and on plate afterwards"]}
{"id": "Heat pancake|2", "answers": ["location of pancake was in the container before and in the microwave afterwards", "temperature of pancake was cold before and hot afterwards", "temperature of pancake was room temperature before and heated afterwards", "temperature of pancake was cold before and hot afterwards", "temperature of pancake was room temperature before and heated afterwards", "temperature of pancake was cold before and hot afterwards", "location of pancake was in fridge before and in microwave afterwards", "temperature of pancake was room temperature before and heated afterwards", "state of pancake was solid before and melted afterwards", "temperature of pancake was room temperature before and heated afterwards", "state of microwave was off before and on afterwards", "location of pancake was in container before and in microwave afterwards", "temperature of pancake was room temperature before and heated afterwards"]}
{"id": "Heat pancake|3", "answers": ["state of microwave was off before and on afterwards", "power of microwave was off before and on afterwards", "temperature of pancake was cold before and hot afterwards", "temperature of pancake was cold before and hot afterwards", "temperature of pancake was cold before and hot afterwards", "temperature of pancake was cold before and hot afterwards", "temperature of pancake was cold before and hot afterwards", "temperature of pancake was cold before and hot afterwards", "temperature of pancake was cold before and hot afterwards", "temperature of pancake was cold before and hot afterwards", "temperature of microwave was cold before and hot afterwards", "temperature of pancake was cold before and hot afterwards", "temperature of pancake was cold before and hot afterwards", "temperature of pancake was cold before and hot afterwards", "temperature of pancake was cold before and hot afterwards", "temperature of microwave was cold before and hot afterwards"]}
{"id": "Heat pancake|4", "answers": ["state of pancake was hot before and cooled afterwards", "temperature of pancake was hot before and cooler afterwards", "location of pancake was in microwave before and out of microwave afterwards", "location of pancake was in microwave before and out of microwave afterwards", "temperature of pancake was hot before and cooler afterwards", "temperature of pancake was hot before and cooler afterwards", "location of pancake was in microwave before and out of microwave afterwards", "temperature of pancake was hot before and cooler afterwards", "temperature of pancake was hot before and cooler afterwards", "location of pancake was in microwave before and out of microwave afterwards", "temperature of pancake was hot before and cool afterwards"]}
{"id": "Wash your hands|1", "answers": ["location of water was in faucet before and in sink afterwards", "wetness of hands was dry before and wet afterwards", "wetness of hands was dry before and wet afterwards", "location of water was in faucet before and in sink afterwards", "wetness of hands was dry before and wet afterwards", "moisture of hands was dry before and wet afterwards", "location of water was in faucet before and in sink afterwards", "wetness of hands was dry before and wet afterwards", "location of water was in faucet before and in sink afterwards", "wetness of hands was dry before and wet afterwards", "wetness of hands was dry before and wet afterwards"]}
{"id": "Wash your hands|2", "answers": ["location of soap was in the bottle before and in the sink afterwards", "location of soap was in the container before and in the sink afterwards", "location of soap was in the container before and in the sink afterwards", "cleanness of sink was dirty before and clean afterwards", "location of soap was in the container before and in the sink afterwards", "location of soap was in the container before and in the sink afterwards", "location of scrub was in the container before and in the sink afterwards", "cleanness of sink was dirty before and clean afterwards", "location of scrub was in the container before and in the sink afterwards", "location of soap was in the container before and in the sink afterwards", "location of scrub was in the container before and in the sink afterwards", "cleanness of soap was dirty before and clean afterwards", "location of soap was in the container before and in the sink afterwards", "cleanness of sink was dirty before and clean afterwards"]}
{"id": "Wash your hands|3", "answers": ["moisture of sponge was dry before and wet afterwards", "state of soap was wet before and rinsed afterwards", "state of sink was full of water before and empty of water afterwards", "cleanness of sponge was clean before and dirty afterwards", "cleanness of sink was dirty before and clean afterwards", "cleanness of water was dirty before and clean afterwards", "cleanness of soap was dirty before and clean afterwards", "cleanness of water was dirty before and clean afterwards", "cleanness of water was dirty before and clean afterwards", "cleanness of water was dirty before and rinsed afterwards", "cleanness of soap was dirty before and rinsed afterwards", "cleanness of water was dirty before and rinsed afterwards", "wetness of sponge was dry before and wet afterwards", "wetness of sink was dry before and wet afterwards", "wetness of soap was dry before and wet afterwards", "wetness of sponge was dry before and wet afterwards", "wetness of sink was dry before and wet afterwards", "wetness of soap was dry before and wet afterwards", "wetness of sponge was dry before and wet afterwards", "wetness of sink was dry before and wet afterwards", "wetness of sponge was dry before and wet afterwards", "wetness of soap was dry before and wet afterwards", "wetness of"]}
{"id": "Buy a ticket from SF to Hawaii|1", "answers": ["state of flights was closed before and open afterwards", "state of google flights was closed before and open afterwards", "state of flights was unavailable before and available afterwards", "state of flights was unselected before and selected afterwards", "state of google flights was closed before and open afterwards"]}
{"id": "Buy a ticket from SF to Hawaii|2", "answers": ["state of flights was considered before and chosen afterwards", "state of non-stop flights was considered before and chosen afterwards", "state of flights was unselected before and selected afterwards", "state of flights was unselected before and selected afterwards"]}
{"id": "Buy a ticket from SF to Hawaii|3", "answers": ["state of tickets was unselected before and selected afterwards", "state of tickets was unselected before and selected afterwards", "state of tickets was unsold before and sold afterwards", "state of tickets was unsold before and purchased afterwards", "state of tickets was unsold before and purchased afterwards", "state of tickets was unsold before and purchased afterwards", "state of money was in wallet before and in cash register afterwards", "state of money was in wallet before and in cash register afterwards", "state of flights was unselected before and selected afterwards", "state of price was unselected before and selected afterwards", "state of time slots was unselected before and selected afterwards", "state of price was unselected before and selected afterwards"]}
{"id": "Buy a ticket from SF to Hawaii|4", "answers": ["state of email was unread before and read afterwards", "state of ticket was unsold before and sold afterwards", "state of email was unread before and read afterwards", "state of ticket was unsold before and purchased afterwards", "state of email was unread before and read afterwards"]}
{"id": "Drive to Los Angelas|1", "answers": ["state of car was empty before and full afterwards", "location of gas was in can before and in tank afterwards", "location of gas was in can before and in tank afterwards", "location of gas was in can before and in tank afterwards", "location of gas was in can before and in tank afterwards", "location of gas was in can before and in tank afterwards", "location of gas was in can before and in tank afterwards", "location of gas was in can before and in tank afterwards", "location of gas was in can before and in tank afterwards", "location of gas was in can before and in tank afterwards", "location of gas was in can before and in tank afterwards", "location of gas was in can before and in tank afterwards"]}
{"id": "Drive to Los Angelas|2", "answers": ["location of car was on the way to LA before and on the way to LA afterwards", "speed of car was moving slowly before and moving faster afterwards", "location of i5 was on the way to LA before and on the way to LA afterwards", "speed of car was moving slowly before and moving faster afterwards", "location of i5 was on the way to LA before and on the way to LA afterwards", "speed of car was moving slowly before and moving faster afterwards", "location of i5 was on the way to LA before and on the way to LA afterwards", "speed of car was moving slowly before and moving faster afterwards"]}
{"id": "Drive to Los Angelas|3", "answers": ["state of sign was absent before and present afterwards", "location of you was on the way to l.a before and in la afterwards", "location of you was on the road before and in la afterwards", "state of sign was absent before and present afterwards", "location of you was on the way to l.a before and in la afterwards"]}
{"id": "Boating in lake|1", "answers": ["location of boat was at the rental place before and at the marina afterwards", "ownership of boat was owned by the store before and owned by the shopper afterwards", "location of boat was at the store before and at the marina afterwards", "location of boat was at the store before and at the marina afterwards", "location of boat was at the store before and at the marina afterwards", "ownership of boat was owned by the store before and rented to the shopper afterwards", "location of boat was at the store before and at the marina afterwards", "location of boat was at the store before and at the marina afterwards", "location of boat was at the store before and at the marina afterwards"]}
{"id": "Boating in lake|2", "answers": ["location of person was on land before and on water afterwards", "location of lake was unknown before and found afterwards", "state of lake was unfound before and found afterwards", "location of person was on land before and in water afterwards", "location of boat was at home before and at lake afterwards", "location of person was on land before and in water afterwards"]}
{"id": "Boating in lake|3", "answers": ["location of boat was at home before and at the lake afterwards", "location of boat was at home before and at the lake afterwards", "location of boat was at home before and in lake afterwards", "location of boat was at home before and in lake afterwards", "location of boat was at home before and in lake afterwards", "location of boat was at home before and in lake afterwards", "location of boat was at home before and in lake afterwards"]}
{"id": "Boating in lake|4", "answers": ["state of you was enjoying the boat before and now enjoying the boat afterwards"]}
{"id": "Implement a code function|1", "answers": ["knowledge of api was undetermined before and determined afterwards", "knowledge of function was undetermined before and implemented afterwards", "state of function was undetermined before and implemented afterwards", "state of api was undetermined before and determined afterwards"]}
{"id": "Implement a code function|2", "answers": ["state of input and output parameters was undecided before and decided afterwards", "state of input and output parameters was undecided before and decided afterwards", "state of parameters was unmeasured before and measured afterwards", "state of input and output was unmeasured before and measured afterwards"]}
{"id": "Implement a code function|3", "answers": ["state of function was unimplemented before and implemented afterwards", "state of function was unimplemented before and implemented afterwards", "state of function was unimplemented before and implemented afterwards", "state of function was unimplemented before and implemented afterwards"]}
{"id": "Implement a code function|4", "answers": ["state of function was unimplemented before and implemented afterwards", "state of test was absent before and present afterwards", "state of system test was absent before and present afterwards", "state of unit test was absent before and present afterwards", "state of api test was absent before and present afterwards", "state of system test was absent before and present afterwards"]}
{"id": "ï»¿Making a Virgin Strawberry Daiquiri|1", "answers": ["location of ice was in the freezer before and in the blender afterwards", "location of ice was in freezer before and in blender afterwards", "location of ice was in freezer before and in blender afterwards", "volume of blender was empty before and full afterwards", "location of ice was in the freezer before and in the blender afterwards", "location of ice was in freezer before and in blender afterwards", "location of ice was in the freezer before and in the blender afterwards", "location of ice was in the freezer before and in the blender afterwards", "location of ice was in the freezer before and in the blender afterwards", "location of ice was in the freezer before and in the blender afterwards", "location of ice was in the freezer before and in the blender afterwards", "location of ice was in the blender before and in the ice cube tray afterwards", "location of ice was in the blender before and in the ice cube tray afterwards", "volume of blender was empty before and full afterwards", "temperature of blender was cold before and warm afterwards", "temperature of blender was cold before and warm afterwards", "temperature of ice was cold before and cold afterwards", "temperature of blender was cool before and warm afterwards"]}
{"id": "ï»¿Making a Virgin Strawberry Daiquiri|2", "answers": ["composition of strawberries was whole before and cut afterwards", "state of strawberries was whole before and sliced afterwards", "state of strawberries was whole before and cut afterwards", "size of strawberries was whole before and cut into pieces afterwards", "composition of strawberries was whole before and cut afterwards", "cleanness of knife was clean before and dirty afterwards", "composition of strawberries was whole before and cut up afterwards", "location of strawberries was in the fridge before and in the blender afterwards", "weight of blender was lighter before and heavier afterwards", "cleanness of knife was clean before and dirty afterwards", "composition of strawberries was whole before and cut up afterwards", "location of strawberries was in fridge before and in blender afterwards", "weight of blender was lighter before and heavier afterwards", "cleanness of cutting board was clean before and dirty afterwards", "cleanness of blender was clean before and dirty afterwards", "location of strawberries was in the fridge before and in the blender afterwards"]}
{"id": "ï»¿Making a Virgin Strawberry Daiquiri|3", "answers": ["location of lime juice was in a juice box before and in the blender afterwards", "location of sugar was in the container before and in the blender afterwards", "location of strawberries was outside of blender before and inside blender afterwards", "location of lime juice was in a juice box before and in the blender afterwards", "location of sugar was in the container before and in the blender afterwards", "location of lime juice was in a juice box before and in the blender afterwards", "location of lime juice was in a juice box before and in the blender afterwards", "location of sugar was in the container before and in the blender afterwards", "location of lime juice was in a juice box before and in the blender afterwards", "location of lime juice was in a juice box before and in the blender afterwards", "location of lime juice was in a juice box before and in the blender afterwards", "location of strawberries was outside of blender before and inside blender afterwards", "location of lime juice was in a juice box before and in the blender afterwards", "location of lime juice was in a juice box before and in the blender afterwards", "location of lime juice was in a juice box before and in the blender afterwards", "location of lime juice was in a juice box before and in the blender afterwards", "location of strawberries was outside of blender before and inside blender afterwards"]}
{"id": "ï»¿Making a Virgin Strawberry Daiquiri|4", "answers": ["texture of strawberries was hard before and soft afterwards", "texture of mixture was chunky before and smooth afterwards", "texture of strawberries was firm before and soft afterwards", "texture of strawberries was firm before and smooth afterwards", "texture of mixture was grainy before and smooth afterwards", "texture of strawberries was firm before and soft afterwards", "texture of mixture was grainy before and smooth afterwards", "texture of strawberries was hard before and soft afterwards", "texture of mixture was grainy before and smooth afterwards", "texture of mixture was grainy before and smooth afterwards", "texture of mixture was grainy before and smooth afterwards", "texture of mixture was grainy before and smooth afterwards", "texture of mixture was grainy before and smooth afterwards", "texture of mixture was grainy before and smooth afterwards", "texture of mixture was grainy before and smooth afterwards", "texture of mixture was grainy before and smooth afterwards", "texture of mixture was grainy before and smooth afterwards", "texture of mixture was grainy before and smooth afterwards", "texture of mixture was grainy before and smooth afterwards"]}
{"id": "ï»¿Making a Virgin Strawberry Daiquiri|5", "answers": ["weight of the glass was lighter before and heavier afterwards", "location of the mixture was in the blender before and in the glass afterwards", "cleanness of the glass was clean before and dirty afterwards", "location of the mixture was in the blender before and in the glass afterwards", "weight of the blender was heavier before and lighter afterwards", "fullness of blender was fuller before and less full afterwards", "location of the mixture was in the blender before and in the glass afterwards", "fullness of glass was empty before and full afterwards", "weight of the glass was lighter before and heavier afterwards", "location of the mixture was in the blender before and in the glass afterwards", "weight of the blender was heavier before and lighter afterwards", "fullness of glass was empty before and full afterwards", "weight of the blender was heavier before and lighter afterwards", "weight of the glass was lighter before and heavier afterwards", "location of mixture was in blender before and in glass afterwards", "weight of blender was heavier before and lighter afterwards", "weight of glass was lighter before and heavier afterwards"]}
{"id": "ï»¿Making a Virgin Strawberry Daiquiri|6", "answers": [""]}
{"id": "Making Matcha Green Tea the Traditional Way|1", "answers": ["temperature of matcha was cool before and hot afterwards", "temperature of water was cool before and hot afterwards", "temperature of matcha was cool before and hot afterwards", "temperature of bowl was cool before and hot afterwards", "temperature of matcha was cool before and hot afterwards", "temperature of water was cool before and hot afterwards", "temperature of matcha was cool before and hot afterwards", "temperature of matcha was cool before and hot afterwards", "temperature of water was cool before and hot afterwards", "location of water was in the tap before and in the bowl afterwards", "temperature of matcha was cool before and hot afterwards", "temperature of matcha was cool before and hot afterwards", "location of water was in the faucet before and in the bowl afterwards", "location of matcha was in the container before and in the bowl afterwards", "location of matcha was in the container before and in the bowl afterwards", "location of water was in the tap before and in the bowl afterwards", "location of matcha was in the container before and in the bowl afterwards", "temperature of matcha was cool before and hot afterwards", "location of matcha was in container before and in bowl afterwards"]}
{"id": "Making Matcha Green Tea the Traditional Way|2", "answers": ["movement of whisk was still before and moving afterwards", "temperature of matcha was cool before and hot afterwards", "temperature of matcha was cool before and hot afterwards", "temperature of water was cool before and hot afterwards", "location of whisk was in cupboard before and in hand afterwards", "temperature of matcha was cool before and hot afterwards", "temperature of water was cool before and hot afterwards", "location of whisk was in cupboard before and in bowl afterwards", "temperature of water was cool before and hot afterwards", "temperature of water was cold before and hot afterwards", "temperature of chasen was cool before and hot afterwards", "location of chasen was in the cupboard before and in the bowl afterwards", "temperature of matcha was cool before and hot afterwards", "temperature of water was cold before and hot afterwards", "temperature of matcha was cool before and hot afterwards", "temperature of water was cold before and hot afterwards", "temperature of chasen was cool before and hot afterwards", "temperature of matcha was cool before and hot afterwards", "temperature of water was cold before and hot afterwards", "temperature of matcha was cool before and hot afterwards", "temperature of chasen was cool before and hot afterwards"]}
{"id": "Making Matcha Green Tea the Traditional Way|3", "answers": ["location of hot water was in bowl before and in sink afterwards", "temperature of matcha was warm before and cool afterwards", "temperature of bowl was hot before and cool afterwards", "temperature of matcha was hot before and cool afterwards", "temperature of matcha was hot before and cool afterwards", "temperature of bowl was hot before and cool afterwards", "temperature of matcha was hot before and cool afterwards", "temperature of matcha was hot before and cool afterwards", "temperature of matcha was hot before and cool afterwards", "temperature of water was hot before and cool afterwards", "temperature of matcha was hot before and cool afterwards", "temperature of matcha was hot before and cool afterwards", "temperature of matcha was hot before and cool afterwards", "temperature of matcha was hot before and cool afterwards", "temperature of matcha was hot before and cool afterwards", "temperature of matcha was hot before and cool afterwards", "temperature of matcha was hot before and cool afterwards", "temperature of matcha was hot before and cool afterwards", "temperature of matcha was hot before and cool afterwards"]}
{"id": "Making Matcha Green Tea the Traditional Way|4", "answers": ["location of matcha was in bowl before and in strainer afterwards", "location of matcha was in bowl before and in strainer afterwards", "weight of strainer was lighter before and heavier afterwards", "cleanness of strainer was clean before and dirty afterwards", "weight of bowl was heavier before and lighter afterwards", "location of matcha was in the bowl before and in the strainer afterwards", "weight of bowl was heavier before and lighter afterwards", "volume of bowl was full before and empty afterwards", "location of matcha was in bowl before and in strainer afterwards", "cleanness of mesh was clean before and dirty afterwards", "weight of bowl was heavier before and lighter afterwards", "volume of bowl was full before and empty afterwards", "location of matcha was in bowl before and in strainer afterwards", "location of matcha was in bowl before and in strainer afterwards", "volume of bowl was full before and empty afterwards"]}
{"id": "Making Matcha Green Tea the Traditional Way|5", "answers": ["Emptyness of bowl was full before and empty afterwards", "location of matcha was in strainer before and in bowl afterwards", "cleanness of bowl was clean before and dirty afterwards", "weight of bowl was lighter before and heavier afterwards", "location of matcha was in the strainer before and in the bowl afterwards", "cleanness of bowl was clean before and dirty afterwards", "weight of bowl was lighter before and heavier afterwards", "location of matcha was in the strainer before and in the bowl afterwards", "weight of bowl was lighter before and heavier afterwards", "cleanness of bowl was clean before and dirty afterwards", "volume of bowl was empty before and full afterwards", "location of matcha was in the strainer before and in the bowl afterwards", "location of matcha was in the bowl before and in the empty", "dry bowl afterwards", "weight of bowl was lighter before and heavier afterwards", "volume of bowl was empty before and full afterwards", "cleanness of bowl was clean before and dirty afterwards", "location of matcha was in the bowl before and in the strainer afterwards"]}
{"id": "Making Matcha Green Tea the Traditional Way|6", "answers": ["temperature of teacup was room temperature before and hot afterwards", "temperature of bowl was hot before and cool afterwards", "temperature of teacup was cool before and hot afterwards", "temperature of bowl was hot before and cool afterwards", "temperature of teacup was cool before and hot afterwards", "temperature of bowl was hot before and cool afterwards", "temperature of teacup was cool before and hot afterwards", "temperature of teacup was room temperature before and hot afterwards", "temperature of teacup was room temperature before and hot afterwards", "temperature of teacup was room temperature before and cool afterwards", "temperature of teacup was room temperature before and hot afterwards", "temperature of teacup was room temperature before and cool afterwards", "temperature of teacup was room temperature before and hot afterwards", "temperature of teacup was room temperature before and cool afterwards", "temperature of teacup was room temperature before and hot afterwards", "temperature of teacup was room temperature before and cool afterwards", "temperature of teacup was room temperature before and hot afterwards", "temperature of teacup was room temperature before and cool afterwards", "temperature of teacup was room temperature before and hot afterwards", "temperature of teacup was room temperature before and cool afterwards", "temperature of teacup was room"]}
{"id": "Making Matcha Green Tea the Traditional Way|7", "answers": ["temperature of matcha was cooler before and warmer afterwards", "temperature of matcha was cool before and hot afterwards", "temperature of matcha was cool before and hot afterwards", "temperature of matcha was cooler before and warmer afterwards", "temperature of matcha was cooler before and warmer afterwards", "temperature of matcha was cooler before and warmer afterwards", "temperature of matcha was cooler before and warmer afterwards", "temperature of matcha was cooler before and warmer afterwards", "temperature of matcha was cooler before and warmer afterwards", "temperature of matcha was cooler before and warmer afterwards", "temperature of matcha was cooler before and warmer afterwards", "temperature of matcha was cooler before and warmer afterwards", "temperature of matcha was cooler before and warmer afterwards", "temperature of matcha was cooler before and warmer afterwards", "temperature of matcha was cooler before and warmer afterwards", "temperature of matcha was cooler before and warmer afterwards", "temperature of matcha was cooler before and warmer afterwards", "temperature of matcha was cooler before and warmer afterwards", "temperature of matcha was cooler before and warmer afterwards", "temperature of matcha was cooler before and warmer afterwards", "temperature of matcha was cooler before and warmer afterwards", "temperature of matcha was cooler before and warmer afterwards", "temperature of matcha was cooler before and warmer afterwards", "temperature of"]}
{"id": "Making Matcha Green Tea the Traditional Way|8", "answers": ["temperature of matcha was cooler before and warmer afterwards", "temperature of bowl was cooler before and warmer afterwards", "temperature of matcha was cooler before and warmer afterwards", "temperature of matcha was cooler before and warmer afterwards", "temperature of matcha was cooler before and warmer afterwards", "temperature of matcha was cooler before and warmer afterwards", "temperature of matcha was cooler before and warmer afterwards", "temperature of matcha was cooler before and warmer afterwards", "volume of bowl was empty before and full afterwards", "temperature of matcha was cooler before and warmer afterwards", "temperature of matcha was cooler before and warmer afterwards", "location of teacup water was in teacup before and in bowl afterwards", "location of matcha was in bowl before and in teacup afterwards", "temperature of matcha was cooler before and warmer afterwards", "location of matcha was in bowl before and in teacup afterwards", "temperature of matcha was cool before and hot afterwards"]}
{"id": "Making Matcha Green Tea the Traditional Way|9", "answers": ["cleanness of utensils was dirty before and clean afterwards", "location of utensils was in the drawer before and on the table afterwards", "cleanness of utensils was dirty before and clean afterwards", "location of utensils was in the drawer before and in the teacup afterwards", "cleanness of utensils was dirty before and clean afterwards", "location of utensils was in the drawer before and in the teacup afterwards", "cleanness of utensils was dirty before and clean afterwards", "location of utensils was in the drawer before and in the teacup afterwards", "cleanness of utensils was dirty before and clean afterwards", "cleanness of utensils was dirty before and clean afterwards", "location of utensils was in the drawer before and in the teacup afterwards", "location of utensils was in the drawer before and in the teacup afterwards", "cleanness of utensils was dirty before and clean afterwards", "cleanness of utensils was dirty before and clean afterwards", "cleanness of utensils was dirty before and clean afterwards", "cleanness of utensils was dirty before and clean afterwards", "cleanness of utensils was dirty before and clean afterwards", "cleanness of utensils was"]}
{"id": "How to Make a Watermelon Keg|1", "answers": ["cleanness of watermelon was dirty before and clean afterwards", "location of dirt was on the watermelon before and on the towel afterwards", "wetness of watermelon was dry before and wet afterwards", "wetness of watermelon was dry before and wet afterwards", "location of water was in hose before and on watermelon afterwards", "wetness of watermelon was dry before and wet afterwards", "location of water was in hose before and on watermelon afterwards", "wetness of towel was dry before and wet afterwards", "wetness of watermelon was dry before and wet afterwards", "cleanness of watermelon was dirty before and clean afterwards", "location of water was in hose before and on watermelon afterwards", "wetness of towel was dry before and wet afterwards", "wetness of watermelon was dry before and wet afterwards", "wetness of towel was dry before and wet afterwards", "cleanness of watermelon was dirty before and clean afterwards", "wetness of watermelon was dry before and wet afterwards"]}
{"id": "How to Make a Watermelon Keg|2", "answers": ["cleanness of knife was clean before and dirty afterwards", "state of watermelon was unmarked before and marked afterwards", "state of watermelon was unmarked before and marked afterwards", "location of knife was in the drawer before and on the watermelon afterwards", "state of watermelon was unmarked before and marked afterwards", "location of knife was in the drawer before and on the watermelon afterwards", "cleanness of knife was clean before and dirty afterwards", "location of knife was in the drawer before and on the watermelon afterwards", "location of watermelon was in the garden before and in the sink afterwards"]}
{"id": "How to Make a Watermelon Keg|3", "answers": ["state of watermelon was plain before and drawn afterwards", "state of watermelon was plain before and drawn on afterwards", "state of watermelon was plain before and drawn on afterwards", "state of watermelon was plain before and marked afterwards", "state of watermelon was unmarked before and drawn on afterwards"]}
{"id": "How to Make a Watermelon Keg|4", "answers": ["shape of watermelon was whole before and cut afterwards", "state of watermelon was whole before and cut afterwards", "size of watermelon was whole before and cut off afterwards", "state of watermelon was whole before and cut afterwards", "location of top was on the watermelon before and removed afterwards"]}
{"id": "How to Make a Watermelon Keg|5", "answers": ["location of top was on the watermelon before and off the watermelon afterwards", "location of top was on the watermelon before and removed afterwards", "state of watermelon was covered before and uncovered afterwards", "location of top was on the watermelon before and off the watermelon afterwards", "state of watermelon was covered before and uncovered afterwards", "location of top was on the watermelon before and off the watermelon afterwards", "state of watermelon was covered before and uncovered afterwards"]}
{"id": "How to Make a Watermelon Keg|6", "answers": ["Flesh of watermelon flesh was whole before and scooped out afterwards", "location of watermelon flesh was on the watermelon before and in a bowl afterwards", "cleanness of bowl was clean before and dirty afterwards", "location of watermelon flesh was on the watermelon before and in the bowl afterwards", "location of watermelon flesh was on the watermelon before and in the bowl afterwards", "location of watermelon flesh was on the watermelon before and in the bowl afterwards", "cleanness of watermelon was dirty before and clean afterwards", "weight of bowl was lighter before and heavier afterwards", "volume of watermelon was full before and empty afterwards", "location of watermelon flesh was on the watermelon before and in the bowl afterwards", "location of watermelon flesh was on the watermelon before and in the bowl afterwards", "location of watermelon flesh was on the watermelon before and in the bowl afterwards", "location of watermelon flesh was on the watermelon before and in the bowl afterwards", "location of watermelon flesh was on the watermelon before and in the bowl afterwards"]}
{"id": "How to Make a Watermelon Keg|7", "answers": ["location of goodies was in the watermelon before and in a container afterwards", "location of watermelon was in the container before and out of the container afterwards", "location of goodies was in the watermelon before and in a container afterwards", "location of watermelon was in the container before and out of the container afterwards", "location of watermelon was in the container before and out of the container afterwards", "location of goodies was in the watermelon before and in a container afterwards", "location of watermelon was in the container before and out of the container afterwards", "location of watermelon was in the hands before and in the container afterwards"]}
{"id": "How to Make a Watermelon Keg|8", "answers": ["cleanness of inside of watermelon was dirty before and clean afterwards", "location of paper towel was in the drawer before and in the hand afterwards", "cleanness of paper towel was clean before and dirty afterwards", "location of paper towel was in the drawer before and on the watermelon afterwards", "cleanness of watermelon was dirty before and clean afterwards", "location of paper towel was in the drawer before and on the watermelon afterwards", "location of paper towel was in the drawer before and on the watermelon afterwards", "cleanness of watermelon was dirty before and clean afterwards", "location of paper towel was in the drawer before and on the watermelon afterwards", "location of paper towel was in the drawer before and on the watermelon afterwards", "location of paper towel was in the drawer before and on the watermelon afterwards", "weight of the watermelon was heavier before and lighter afterwards", "location of paper towel was in the drawer before and on the watermelon afterwards", "weight of the watermelon was heavier before and lighter afterwards", "location of watermelon was inside the watermelon before and outside the watermelon afterwards", "weight of the watermelon was lighter before and heavier afterwards", "weight of the watermelon was lighter before and heavier afterwards", "wetness of the paper towel was dry before and wet afterwards", "wet"]}
{"id": "How to Make a Watermelon Keg|9", "answers": [""]}
{"id": "How to Make a Watermelon Keg|10", "answers": ["fullness of fruit keg was empty before and full afterwards", "weight of fruit keg was lighter before and heavier afterwards", "location of punch was in a bottle before and in the fruit keg afterwards", "weight of fruit keg was lighter before and heavier afterwards", "location of punch was in a bottle before and in the fruit keg afterwards", "weight of fruit keg was lighter before and heavier afterwards", "location of punch was in a bottle before and in the fruit keg afterwards", "weight of fruit keg was lighter before and heavier afterwards", "location of punch was in a bottle before and in the fruit keg afterwards", "weight of fruit keg was lighter before and heavier afterwards", "location of punch was in bottle before and in fruit keg afterwards", "location of punch was in bottle before and in fruit keg afterwards", "location of punch was in bottle before and in fruit keg afterwards", "location of punch was in bottle before and in fruit keg afterwards", "location of punch was in bottle before and in fruit keg afterwards", "location of punch was in bottle before and in fruit keg afterwards", "location of punch was in bottle before and in fruit keg afterwards"]}
{"id": "How to Make a Watermelon Keg|11", "answers": [""]}
{"id": "How to Make a Watermelon Keg|12", "answers": ["Addition of watermelon was separate before and now in mixture afterwards", "location of watermelon was on the counter before and in the keg afterwards", "weight of the keg was lighter before and now heavier afterwards", "location of watermelon was on the counter before and in the keg afterwards", "weight of the keg was lighter before and now heavier afterwards", "volume of the watermelon was fuller before and now emptier afterwards", "location of watermelon was on the counter before and in the keg afterwards", "location of watermelon was on the counter before and in the keg afterwards", "weight of the watermelon was heavier before and now lighter afterwards", "wetness of paper towel was dry before and wet afterwards", "location of watermelon was on the counter before and in the keg afterwards", "location of watermelon was on the counter before and in the keg afterwards", "location of watermelon was on the counter before and in the keg afterwards", "weight of the watermelon was heavier before and now lighter afterwards", "wetness of paper towel was dry before and wet afterwards", "location of watermelon was on the counter before and in the keg afterwards", "weight of the watermelon was heavier before and now lighter afterwards", "wetness of paper towel was dry before and wet afterwards"]}
{"id": "How to Make a Watermelon Keg|13", "answers": [""]}
{"id": "Making Simple Eggnog|1", "answers": ["state of ingredients was separate before and mixed afterwards", "location of milk was in the carton before and in the bowl afterwards", "composition of milk was by itself before and mixed with other ingredients afterwards", "location of milk was in the carton before and in the bowl afterwards", "location of milk was in the fridge before and in the bowl afterwards", "composition of milk was in carton before and mixed with other ingredients afterwards", "location of milk was in the fridge before and in the bowl afterwards", "location of milk was in the fridge before and in the bowl afterwards", "location of milk was in the fridge before and in the bowl afterwards", "location of milk was in the fridge before and in the bowl afterwards", "location of milk was in the fridge before and in the bowl afterwards"]}
{"id": "Making Simple Eggnog|2", "answers": ["state of egg mixture was separate before and mixed afterwards", "composition of egg mixture was separate before and mixed afterwards", "location of eggs was in shell before and in bowl afterwards", "composition of milk was separate before and mixed afterwards", "location of milk was in the container before and in the bowl afterwards", "composition of egg mixture was separate before and mixed afterwards", "location of eggs was in carton before and in bowl afterwards", "composition of milk was separate before and mixed afterwards", "location of egg mixture was in a container before and in a bowl afterwards", "location of eggshells was in the carton before and in the bowl afterwards", "location of eggshells was in the carton before and in the bowl afterwards", "location of eggs was in carton before and in bowl afterwards", "location of carton was in the pantry before and on the table afterwards"]}
{"id": "Making Simple Eggnog|3", "answers": ["temperature of mixture was cool before and hot afterwards", "temperature of pan was cool before and hot afterwards", "temperature of milk mixture was cool before and hot afterwards", "temperature of eggs was cool before and hot afterwards", "temperature of milk mixture was cold before and hot afterwards", "temperature of eggs was cool before and hot afterwards", "temperature of milk mixture was cold before and hot afterwards", "temperature of eggs was cool before and hot afterwards", "temperature of milk mixture was cold before and hot afterwards", "temperature of eggs was cool before and hot afterwards", "temperature of milk mixture was cold before and hot afterwards", "temperature of eggs was cool before and hot afterwards", "temperature of milk mixture was cold before and hot afterwards", "temperature of milk mixture was cold before and hot afterwards", "temperature of milk mixture was cold before and hot afterwards", "temperature of pan was cool before and hot afterwards", "temperature of milk mixture was cold before and hot afterwards", "temperature of milk mixture was cold before and hot afterwards", "temperature of milk mixture was cold before and hot afterwards", "temperature of milk mixture was cold before and hot afterwards", "temperature of milk mixture was cold before and hot afterwards", "temperature of milk mixture was cold before and hot afterwards", "temperature of milk mixture was cold before and hot afterwards", "temperature of milk mixture was cold before and hot afterwards"]}
{"id": "Making Simple Eggnog|4", "answers": ["temperature of eggnog was hot before and cooling afterwards", "location of eggnog was on the stove top before and removed from the stove top afterwards", "temperature of eggnog was hot before and cooler afterwards", "temperature of eggnog was hot before and cooler afterwards", "temperature of eggnog was hot before and cooler afterwards", "temperature of eggnog was hot before and cooler afterwards", "temperature of eggnog was hot before and cooler afterwards", "temperature of eggnog was hot before and cooler afterwards", "temperature of eggnog was hot before and cooler afterwards", "temperature of eggnog was hot before and hotter afterwards", "temperature of eggnog was hot before and cooler afterwards", "temperature of eggnog was hot before and hotter afterwards", "temperature of eggnog was hot before and hotter afterwards", "temperature of eggnog was hot before and cooler afterwards", "temperature of eggnog was hot before and hotter afterwards", "temperature of eggnog was hot before and cooler afterwards", "temperature of eggnog was hot before and hotter afterwards", "temperature of eggnog was hot before and cooler afterwards", "temperature of eggnog was hot before and hotter afterwards", "temperature of eggnog was hot before and cooler afterwards", "temperature of eggnog was hot before"]}
{"id": "Making Simple Eggnog|5", "answers": ["location of ingredients was in a container before and in a pot afterwards", "location of ingredients was on counter before and in pot afterwards", "temperature of ingredients was hot before and cooler afterwards", "temperature of ingredients was hot before and cooler afterwards", "temperature of ingredients was hot before and cooler afterwards", "temperature of ingredients was hot before and cooler afterwards", "temperature of ingredients was hot before and cooler afterwards", "temperature of ingredients was hot before and cooler afterwards", "temperature of ingredients was hot before and cooler afterwards", "temperature of ingredients was hot before and cold afterwards", "temperature of ingredients was hot before and cold afterwards", "location of ingredients was in the bowl before and in the pot afterwards", "temperature of ingredients was hot before and cooler afterwards", "temperature of ingredients was hot before and cold afterwards", "temperature of ingredients was hot before and cold afterwards", "location of ingredients was in the bowl before and in the pot afterwards", "location of ingredients was in the bowl before and in the pot afterwards", "location of ingredients was in the bowl before and in the pot afterwards", "location of ingredients was in the bowl before and in the pot afterwards"]}
{"id": "Making Simple Eggnog|6", "answers": ["covering of eggnog was uncovered before and covered afterwards", "location of plastic wrap was on the counter before and on the counter top afterwards", "covering of eggnog was uncovered before and covered afterwards", "location of eggnog was on the stove top before and in the fridge afterwards", "temperature of eggnog was hot before and cooler afterwards", "temperature of eggnog was hot before and cooler afterwards", "temperature of eggnog was hot before and cooler afterwards", "temperature of eggnog was hot before and cooler afterwards", "temperature of eggnog was hot before and cooler afterwards", "temperature of eggnog was hot before and cooler afterwards", "temperature of eggnog was hot before and cooler afterwards", "temperature of eggnog was hot before and cooler afterwards", "temperature of eggnog was hot before and cooler afterwards", "temperature of eggnog was hot before and cooler afterwards", "temperature of eggnog was hot before and cooler afterwards", "temperature of eggnog was hot before and cooler afterwards", "temperature of eggnog was hot before and cooler afterwards", "temperature of eggnog was hot before and cooler afterwards", "temperature of eggnog was hot before and cooler afterwards", "temperature of eggnog was hot before and cooler afterwards", "temperature of eggnog was"]}
{"id": "How to Make Sbiten|1", "answers": ["temperature of water was cool before and hot afterwards", "state of stove was off before and on afterwards", "temperature of water was cold before and hot afterwards", "temperature of water was cold before and hot afterwards", "temperature of water was cold before and hot afterwards", "temperature of water was cold before and boiling afterwards", "temperature of water was cool before and hot afterwards", "temperature of water was cold before and hot afterwards", "temperature of water was cold before and hot afterwards", "temperature of water was cool before and hot afterwards", "temperature of water was cold before and boiling afterwards", "temperature of water was cool before and hot afterwards", "temperature of water was cold before and hot afterwards", "temperature of water was cold before and hot afterwards", "temperature of water was cold before and boiling afterwards"]}
{"id": "How to Make Sbiten|2", "answers": ["temperature of ingredients was cool before and hot afterwards", "location of ingredients was in separate containers before and in pot afterwards", "temperature of ingredients was cool before and hot afterwards", "composition of ingredients was separate before and mixed afterwards", "location of ingredients was in separate containers before and in pot afterwards", "temperature of ingredients was cool before and hot afterwards", "location of ingredients was in separate containers before and in pot afterwards", "temperature of ingredients was cool before and hot afterwards", "temperature of ingredients was room temperature before and hot afterwards", "location of ingredients was in cooler before and in pot afterwards", "temperature of ingredients was room temperature before and hot afterwards", "location of ingredients was in containers before and in pot afterwards", "temperature of ingredients was cool before and hot afterwards", "temperature of ingredients was room temperature before and hot afterwards", "location of ingredients was in cooler before and in pot afterwards", "temperature of ingredients was cool before and hot afterwards", "temperature of ingredients was room temperature before and hot afterwards"]}
{"id": "How to Make Sbiten|3", "answers": ["temperature of water was hot before and simmering afterwards", "temperature of stove was hot before and cool afterwards", "temperature of water was hot before and cool afterwards", "temperature of water was hot before and cool afterwards", "temperature of stove was hot before and cool afterwards", "temperature of water was hot before and cool afterwards", "temperature of water was hot before and cool afterwards", "temperature of water was hot before and cool afterwards", "temperature of stove was hot before and cool afterwards", "temperature of water was hot before and cool afterwards", "temperature of stove was hot before and medium afterwards", "temperature of water was hot before and medium afterwards", "temperature of stove was hot before and cool afterwards", "temperature of water was hot before and medium afterwards", "temperature of water was hot before and cool afterwards", "temperature of water was hot before and medium afterwards", "temperature of water was hot before and cool afterwards", "temperature of stove was hot before and medium afterwards", "temperature of water was hot before and cool afterwards", "temperature of water was hot before and medium afterwards", "temperature of water was hot before and cool afterwards", "temperature of water was hot before and medium afterwards", "temperature of water was hot before and cool afterwards", "temperature of water was hot before and medium afterwards", "temperature of water was hot before and cool afterwards", "temperature of water was"]}
{"id": "How to Make Sbiten|4", "answers": ["temperature of mixture was hot before and cool afterwards", "temperature of mixture was hot before and cool afterwards", "temperature of mixture was hot before and cool afterwards", "temperature of mixture was hot before and cool afterwards", "temperature of mixture was hot before and cool afterwards", "temperature of mixture was hot before and cool afterwards", "temperature of mixture was hot before and cool afterwards", "temperature of mixture was hot before and cool afterwards", "temperature of mixture was hot before and cool afterwards", "temperature of mixture was hot before and cool afterwards", "temperature of mixture was hot before and cool afterwards", "temperature of mixture was hot before and cool afterwards", "temperature of mixture was hot before and cool afterwards"]}
{"id": "How to Make Sbiten|5", "answers": ["location of garnish was on the side before and on the table afterwards", "taste of drink was plain before and garnished afterwards", "taste of drink was plain before and garnished afterwards", "taste of drink was plain before and garnished afterwards", "taste of drink was plain before and garnished afterwards", "taste of drink was plain before and garnished afterwards", "taste of drink was plain before and garnished afterwards", "taste of drink was plain before and garnished afterwards", "taste of drink was plain before and garnished afterwards", "taste of drink was plain before and garnished afterwards", "taste of drink was plain before and garnished afterwards", "taste of drink was plain before and garnished afterwards", "taste of drink was plain before and garnished afterwards", "taste of drink was plain before and garnished afterwards", "taste of drink was plain before and garnished afterwards", "taste of drink was plain before and garnished afterwards", "taste of drink was plain before and garnished afterwards", "taste of drink was plain before and garnished afterwards", "taste of drink was plain before and garnished afterwards", "taste of drink was plain before and garnished afterwards", "taste of drink was plain before and garnished afterwards", "taste of drink was plain before and garnished afterwards", "taste of drink was plain before and garnished afterwards"]}
{"id": "How to Cool a Hot Drink Quickly|1", "answers": ["location of drink was in one cup before and in the other cup afterwards", "location of drink was in one cup before and in other cup afterwards", "volume of cups was empty before and full afterwards", "weight of cups was light before and heavy afterwards", "volume of cups was empty before and full afterwards", "location of drink was in one cup before and in other cup afterwards", "location of drink was in one cup before and in other cup afterwards", "location of drink was in one cup before and in other cup afterwards", "location of drink was in one cup before and in other cup afterwards", "volume of cups was empty before and full afterwards"]}
{"id": "How to Cool a Hot Drink Quickly|2", "answers": ["temperature of drink was warm before and cool afterwards", "temperature of drink was warm before and cooled afterwards", "temperature of drink was warm before and cooled afterwards", "temperature of drink was warm before and cooled afterwards", "temperature of drink was warm before and cooled afterwards", "temperature of drink was warm before and cooled afterwards", "temperature of drink was warm before and cool afterwards"]}
{"id": "How to Cool a Hot Drink Quickly|3", "answers": ["state of drink was full of ice before and melted afterwards", "temperature of drink was warm before and cool afterwards", "temperature of drink was warm before and cool afterwards", "state of drink was warm before and cool afterwards", "temperature of drink was warm before and cool afterwards", "location of drink was in cup before and in mouth afterwards"]}
{"id": "How to Make Hot Cocoa|1", "answers": ["location of sugar was in bag before and in pan afterwards", "location of milk was in carton before and in pan afterwards", "location of sugar was in bag before and in pan afterwards", "location of cocoa powder was in bag before and in pan afterwards", "location of milk was in carton before and in pan afterwards", "location of sugar was in bag before and in pan afterwards", "location of milk was in carton before and in pan afterwards", "location of cocoa powder was in bag before and in pan afterwards", "location of milk was in fridge before and in pan afterwards", "location of sugar was in bag before and in pan afterwards", "location of milk was in fridge before and in pan afterwards", "location of cocoa powder was in bag before and in pan afterwards", "location of milk was in fridge before and in pan afterwards", "location of sugar was in bag before and in pan afterwards", "location of milk was in fridge before and in pan afterwards", "location of cocoa powder was in fridge before and in pan afterwards"]}
{"id": "How to Make Hot Cocoa|2", "answers": ["temperature of mixture was cooler before and warmer afterwards", "temperature of milk was cool before and hot afterwards", "temperature of cocoa was cool before and hot afterwards", "temperature of pan was cool before and hot afterwards", "temperature of mixture was cooler before and warmer afterwards", "temperature of milk was cool before and hot afterwards", "temperature of milk was cold before and hot afterwards", "temperature of cocoa was cool before and hot afterwards", "temperature of mixture was cooler before and warmer afterwards", "temperature of milk was cold before and hot afterwards", "temperature of cocoa was cool before and hot afterwards", "temperature of milk was cold before and hot afterwards", "temperature of mixture was cooler before and warmer afterwards", "temperature of milk was cold before and hot afterwards", "temperature of mixture was cooler before and warmer afterwards", "temperature of milk was cold before and hot afterwards", "temperature of milk was cold before and hot afterwards", "temperature of milk was cold before and hot afterwards", "temperature of milk was cold before and hot afterwards", "temperature of milk was cold before and hot afterwards", "temperature of milk was cold before and hot afterwards", "temperature of milk was cold before and hot afterwards", "temperature of milk was cold before and hot afterwards", "temperature of milk was cold before and hot afterwards", "temperature of milk was cold before and hot afterwards"]}
{"id": "How to Make Hot Cocoa|3", "answers": ["Location of vanilla was in container before and in pan afterwards", "location of cocoa was in container before and in mug afterwards", "location of vanilla was in a container before and in the mug afterwards", "location of vanilla was in a container before and in the mug afterwards", "location of cocoa was in a container before and in a mug afterwards", "location of cocoa was in pan before and in mug afterwards", "location of vanilla was in a container before and in the mug afterwards", "location of vanilla was in a container before and in the mug afterwards", "location of cocoa was in a container before and in a mug afterwards", "location of vanilla was in a container before and in the mug afterwards", "location of cocoa was in a container before and in a mug afterwards", "location of vanilla was in a container before and in the mug afterwards", "location of cocoa was in a container before and in a mug afterwards", "location of vanilla was in a container before and in the mug afterwards", "location of vanilla was in a container before and in the mug afterwards", "location of cocoa was in a container before and in a mug afterwards", "location of vanilla was in a container before and in the mug afterwards", "location of cocoa was in a container before and in a mug afterwards", "location of vanilla was in a container before and in"]}
{"id": "How to Make Hot Cocoa|4", "answers": ["location of marshmallows was in a container before and on the hot cocoa afterwards", "location of marshmallows was in a container before and on the mug afterwards", "location of whipped cream was in a container before and on the mug afterwards", "location of marshmallows was in a container before and on the mug afterwards", "location of marshmallows was in a container before and on the mug afterwards", "location of whipped cream was in a container before and on the mug afterwards", "location of marshmallows was in a container before and on the mug afterwards", "location of marshmallows was in a container before and on the mug afterwards", "location of whipped cream was in a container before and on the mug afterwards", "location of marshmallows was in a container before and on the mug afterwards", "location of marshmallows was in a container before and on the mug afterwards", "location of whipped cream was in a container before and on the mug afterwards", "location of marshmallows was in a container before and on the mug afterwards", "location of marshmallows was in a container before and on the mug afterwards", "location of marshmallows was in a container before and on the mug afterwards", "location of marshmallows was in a container before and on the mug afterwards", "location of marsh"]}
{"id": "How to Make Hot Cocoa From Chocolate|1", "answers": ["size of chocolate was whole before and chopped afterwards", "cleanness of knife was clean before and dirty afterwards", "composition of chocolate was whole before and chopped afterwards", "composition of chocolate was whole before and chopped afterwards", "composition of chocolate was whole before and chopped afterwards", "composition of chocolate was whole before and chopped up afterwards", "location of chocolate was in the container before and in the trash afterwards", "cleanness of chopping tool was clean before and dirty afterwards", "composition of chocolate was whole before and chopped afterwards", "location of chocolate was in the container before and in the trash afterwards", "weight of chocolate container was heavier before and lighter afterwards", "cleanness of chopping tool was clean before and dirty afterwards", "cleanness of knife was clean before and dirty afterwards", "location of chocolate was in the container before and in the trash afterwards", "location of chocolate was in the container before and in the trash afterwards", "composition of chocolate was whole before and chopped afterwards"]}
{"id": "How to Make Hot Cocoa From Chocolate|2", "answers": ["temperature of milk was cool before and hot afterwards", "temperature of milk was cool before and hot afterwards", "temperature of milk was cool before and hot afterwards", "temperature of milk was cool before and hot afterwards", "temperature of milk was cool before and hot afterwards", "temperature of milk was cool before and hot afterwards", "temperature of milk was cool before and hot afterwards", "temperature of salt was cool before and hot afterwards", "temperature of milk was cool before and hot afterwards", "temperature of milk was cool before and hot afterwards", "temperature of milk was cool before and hot afterwards", "temperature of milk was cool before and hot afterwards", "temperature of milk was cool before and hot afterwards", "temperature of milk was cool before and hot afterwards", "temperature of milk was cool before and hot afterwards", "temperature of milk was cool before and hot afterwards", "temperature of milk was cool before and hot afterwards", "temperature of milk was cool before and hot afterwards", "temperature of milk was cool before and hot afterwards", "temperature of milk was cool before and hot afterwards", "temperature of milk was cool before and hot afterwards", "temperature of milk was cool before and hot afterwards", "temperature of milk was cool before and hot afterwards", "temperature of milk was cool before and hot afterwards", "temperature of milk was cool before and hot afterwards", "temperature of milk was cool"]}
{"id": "How to Make Hot Cocoa From Chocolate|3", "answers": ["location of whisk was in the cupboard before and in the hand afterwards", "location of chocolate was in the bowl before and in the cup or saucer afterwards", "composition of chocolate was separate before and mixed afterwards", "location of chocolate was in the bowl before and in the cup afterwards", "composition of chocolate was whole before and chopped afterwards", "location of chocolate was in the bowl before and in the cup afterwards", "composition of chocolate was whole before and chopped afterwards", "location of chocolate was in the bowl before and in the cup afterwards", "location of chocolate was in the bowl before and in the saucer afterwards", "location of chocolate was in the bowl before and in the cup afterwards", "location of chocolate was in the bowl before and in the saucer afterwards", "location of chocolate was in the bowl before and in the cup afterwards", "location of chocolate was in the bowl before and in the saucer afterwards", "location of chocolate was in the bowl before and in the cup afterwards", "location of chocolate was in the bowl before and in the saucer afterwards", "location of chocolate was in the bowl before and in the cup afterwards"]}
{"id": "How to Make Hot Cocoa From Chocolate|4", "answers": ["temperature of milk was hot before and cool afterwards", "temperature of vanilla was cool before and hot afterwards", "power of burner was on before and off afterwards", "temperature of milk was hot before and cool afterwards", "temperature of vanilla was cool before and hot afterwards", "temperature of vanilla was cool before and hot afterwards", "temperature of milk was hot before and cool afterwards", "temperature of chocolate was hot before and cool afterwards", "temperature of milk was hot before and cool afterwards", "temperature of vanilla was cool before and hot afterwards", "temperature of vanilla was room temperature before and hot afterwards", "temperature of vanilla was cool before and hot afterwards", "temperature of milk was hot before and cool afterwards", "temperature of chocolate was hot before and cool afterwards", "temperature of milk was hot before and cool afterwards", "temperature of vanilla was room temperature before and hot afterwards", "temperature of milk was hot before and cool afterwards", "temperature of vanilla was room temperature before and hot afterwards", "temperature of milk was hot before and cool afterwards", "temperature of vanilla was cool before and hot afterwards", "temperature of milk was hot before and cool afterwards", "temperature of chocolate was hot before and cool afterwards", "temperature of milk was hot before and cool afterwards", "temperature of chocolate was hot before and cool afterwards", "temperature of milk was hot before and cool afterwards", "temperature of"]}
{"id": "How to Make Hot Cocoa From Chocolate|5", "answers": ["location of mugs was in the cabinet before and on the table afterwards", "location of hot chocolate was in mug before and in table afterwards", "location of mugs was in the cupboard before and on the table afterwards", "location of whipped cream was in the fridge before and on the mugs afterwards", "weight of mugs was lighter before and heavier afterwards", "volume of mugs was empty before and full afterwards", "location of whipped cream was in the fridge before and on the mugs afterwards", "weight of mugs was lighter before and heavier afterwards", "location of mugs was in the cabinet before and on the table afterwards", "location of whipped cream was in the fridge before and on the mugs afterwards", "location of mugs was in the cabinet before and on the table afterwards", "weight of mugs was lighter before and heavier afterwards", "location of mugs was in the cabinet before and on the table afterwards", "location of whipped cream was in the fridge before and on the mugs afterwards", "location of mugs was in the cabinet before and on the table afterwards", "weight of mugs was lighter before and heavier afterwards", "location of whipped cream was in the fridge before and on the mugs afterwards", "location of whipped cream was in the fridge before and on the mugs afterwards", "weight"]}
{"id": "Single-Serving Microwave Cocoa|1", "answers": ["location of sugar was in container before and in mug afterwards", "location of sugar was in container before and in mug afterwards", "location of salt was in container before and in mug afterwards", "location of cocoa was in container before and in mug afterwards", "location of sugar was in container before and in mug afterwards", "location of salt was in container before and in mug afterwards", "location of cocoa was in container before and in mug afterwards", "location of sugar was in container before and in mug afterwards", "location of salt was in container before and in mug afterwards", "location of cocoa was in container before and in mug afterwards", "location of sugar was in container before and in mug afterwards", "location of salt was in container before and in mug afterwards", "location of sugar was in container before and in mug afterwards", "location of salt was in container before and in mug afterwards", "location of sugar was in container before and in mug afterwards"]}
{"id": "Single-Serving Microwave Cocoa|2", "answers": ["location of milk was in a container before and in the mug afterwards", "location of milk was in a container before and in the mug afterwards", "location of milk was in a container before and in the mug afterwards", "location of milk was in a container before and in the mug afterwards", "location of milk was in a container before and in mug afterwards", "location of milk was in a container before and in mug afterwards", "location of milk was in a container before and in mug afterwards", "location of milk was in a container before and in mug afterwards", "location of milk was in a container before and in mug afterwards", "location of milk was in container before and in mug afterwards", "location of milk was in container before and in mug afterwards", "location of milk was in container before and in mug afterwards"]}
{"id": "Single-Serving Microwave Cocoa|3", "answers": ["temperature of mixture was cooler before and warmer afterwards", "power of microwave was off before and on afterwards", "temperature of mixture was room temperature before and hot afterwards", "temperature of mixture was cooler before and warmer afterwards", "temperature of mixture was cooler before and warmer afterwards", "temperature of mixture was cooler before and warmer afterwards", "temperature of mixture was cooler before and warmer afterwards", "temperature of mixture was cooler before and warmer afterwards", "temperature of mixture was cooler before and warmer afterwards", "temperature of mixture was cooler before and warmer afterwards", "temperature of mixture was cooler before and warmer afterwards", "temperature of mixture was cooler before and warmer afterwards", "temperature of mixture was cooler before and warmer afterwards", "temperature of mixture was cooler before and warmer afterwards", "temperature of mixture was cooler before and warmer afterwards", "temperature of microwave was cold before and hot afterwards", "temperature of mixture was cold before and hot afterwards", "temperature of mixture was cold before and hot afterwards", "temperature of mixture was cold before and hot afterwards", "temperature of mixture was cold before and warm afterwards", "electric conductivity of microwave was off before and on afterwards", "temperature of mug was cold before and hot afterwards", "temperature of mixture was cooler before and warmer afterwards", "temperature of mixture was cooler before and warmer afterwards", "temperature of mixture was cold before and hot afterwards"]}
{"id": "Single-Serving Microwave Cocoa|4", "answers": ["location of vanilla was in container before and in mug afterwards", "location of vanilla was in the container before and in the mug afterwards", "location of mixture was in mug before and in mouth afterwards", "location of vanilla was in the container before and in the mug afterwards", "location of mixture was in mug before and in mouth afterwards", "location of vanilla was in the container before and in the mug afterwards", "location of vanilla was in the container before and in the mug afterwards", "location of vanilla was in the container before and in the mug afterwards", "location of vanilla was in the container before and in the mug afterwards", "location of vanilla was in the container before and in the mug afterwards", "location of vanilla was in the container before and in the mug afterwards", "location of mixture was in mug before and in mouth afterwards", "location of vanilla was in the container before and in the mug afterwards"]}
{"id": "Make Cold Chocolate Drink|1", "answers": ["location of milk was in the fridge before and in the mug afterwards", "location of mug was in the cupboard before and on the table afterwards", "location of mug was in cupboard before and on table afterwards", "location of milk was in the fridge before and in the mug afterwards", "location of mug was in cupboard before and on table afterwards", "location of water was in the faucet before and in the mug afterwards", "location of milk was in the fridge before and in the mug afterwards", "location of mug was in cupboard before and on table afterwards", "location of milk was in the fridge before and in the mug afterwards", "location of mug was in cupboard before and on table afterwards", "location of mug was in cupboard before and on table afterwards"]}
{"id": "Make Cold Chocolate Drink|2", "answers": ["location of cocoa powder was in a container before and in the mug afterwards", "location of sugar was in a container before and in the mug afterwards", "taste of mixture was bland before and chocolate tasting afterwards", "taste of mixture was plain before and chocolate tasting afterwards", "location of sugar was in a container before and in the mug afterwards", "location of cocoa powder was in a container before and in the mug afterwards", "taste of mixture was plain before and chocolate tasting afterwards", "location of sugar was in a container before and in the mug afterwards", "taste of mixture was plain before and chocolate tasting afterwards", "location of cocoa powder was in a container before and in the mug afterwards", "location of sugar was in a container before and in the mug afterwards", "location of cocoa powder was in a container before and in the mug afterwards", "location of sugar was in a container before and in the mug afterwards", "taste of mixture was bland before and chocolate tasting afterwards", "taste of mixture was plain before and chocolate tasting afterwards"]}
{"id": "Make Cold Chocolate Drink|3", "answers": ["power of microwave was off before and on afterwards", "temperature of milk was room temperature before and hot afterwards", "temperature of cocoa was room temperature before and hot afterwards", "temperature of milk was room temperature before and hot afterwards", "temperature of cocoa was room temperature before and hot afterwards", "temperature of sugar was room temperature before and hot afterwards", "temperature of milk was room temperature before and hot afterwards", "temperature of cocoa was room temperature before and hot afterwards", "temperature of milk was room temperature before and hot afterwards", "temperature of cocoa was room temperature before and hot afterwards", "temperature of milk was room temperature before and hot afterwards", "temperature of microwave was cold before and hot afterwards", "temperature of milk was room temperature before and hot afterwards", "temperature of cocoa was room temperature before and hot afterwards", "temperature of milk was room temperature before and hot afterwards", "temperature of microwave was cold before and hot afterwards", "temperature of cocoa was room temperature before and hot afterwards", "temperature of milk was room temperature before and hot afterwards", "temperature of microwave was cold before and hot afterwards", "temperature of sugar was room temperature before and hot afterwards", "temperature of milk was room temperature before and hot afterwards", "temperature of cocoa was room temperature before and hot afterwards", "temperature of milk was room temperature before and hot afterwards", "temperature of microwave was cold before and"]}
{"id": "Make Cold Chocolate Drink|4", "answers": ["temperature of drink was warm before and cold afterwards", "temperature of drink was hot before and cold afterwards", "temperature of drink was hot before and cold afterwards", "temperature of glass was warm before and cold afterwards", "temperature of drink was hot before and cold afterwards", "temperature of glass was warm before and cold afterwards", "temperature of drink was hot before and cold afterwards", "temperature of glass was warm before and cold afterwards", "temperature of drink was hot before and cold afterwards", "temperature of glass was warm before and cold afterwards", "temperature of drink was hot before and cold afterwards", "temperature of drink was hot before and cold afterwards", "temperature of drink was hot before and cold afterwards", "temperature of drink was hot before and cold afterwards", "temperature of drink was hot before and cold afterwards", "temperature of drink was hot before and cold afterwards", "temperature of drink was hot before and cold afterwards", "temperature of glass was warm before and cold afterwards", "temperature of drink was hot before and cold afterwards", "temperature of drink was hot before and cold afterwards", "temperature of glass was warm before and cold afterwards"]}
{"id": "Make Cold Chocolate Drink|5", "answers": ["temperature of drink was warm before and cold afterwards", "temperature of drink was room temperature before and cold afterwards", "location of ice was in the freezer before and in the drink afterwards", "temperature of drink was warm before and cold afterwards", "temperature of drink was room temperature before and cold afterwards", "temperature of drink was room temperature before and cold afterwards", "location of ice was in the freezer before and in the drink afterwards", "temperature of drink was room temperature before and cold afterwards", "temperature of drink was warm before and cold afterwards", "temperature of drink was room temperature before and cold afterwards", "location of ice was in the freezer before and in the drink afterwards", "temperature of drink was warm before and cold afterwards", "location of ice was in the freezer before and in the drink afterwards", "temperature of drink was warm before and cold afterwards", "temperature of drink was warm before and cold afterwards", "location of ice was in the freezer before and in the drink afterwards", "temperature of drink was warm before and cold afterwards"]}
{"id": "﻿How to Make Pancakes|1", "answers": ["state of eggs was whole before and cracked afterwards", "cleanness of bowl was clean before and dirty afterwards", "state of bowl was empty before and full afterwards", "state of eggs was whole before and cracked afterwards", "composition of eggs was whole before and cracked afterwards", "cleanness of bowl was clean before and dirty afterwards", "state of eggs was whole before and cracked afterwards", "composition of eggs was whole before and cracked afterwards", "location of eggs was in the fridge before and in the bowl afterwards", "location of eggs was in the fridge before and in the bowl afterwards", "cleanness of bowl was clean before and dirty afterwards", "location of eggshells was in the egg before and in the bowl afterwards", "cleanness of bowl was clean before and dirty afterwards", "location of eggshells was in the shell before and in the bowl afterwards", "state of eggs was whole before and cracked afterwards"]}
{"id": "﻿How to Make Pancakes|2", "answers": ["state of butter was solid before and liquid afterwards", "temperature of butter was cool before and hot afterwards", "temperature of bowl was room temperature before and warm afterwards", "temperature of butter was cool before and hot afterwards", "temperature of butter was room temperature before and hot afterwards", "temperature of butter was cool before and hot afterwards", "temperature of bowl was cool before and warm afterwards", "temperature of butter was room temperature before and hot afterwards", "temperature of butter was cool before and hot afterwards", "temperature of butter was cool before and hot afterwards", "temperature of butter was cool before and hot afterwards", "temperature of butter was cool before and hot afterwards", "temperature of butter was cool before and hot afterwards", "state of butter was solid before and melted afterwards", "state of butter was solid before and liquid afterwards", "state of eggs was solid before and liquid afterwards", "temperature of butter was cool before and hot afterwards", "temperature of butter was cool before and hot afterwards", "temperature of butter was cool before and hot afterwards", "temperature of butter was cool before and hot afterwards", "temperature of butter was cool before and hot afterwards", "temperature of butter was cool before and hot afterwards", "temperature of butter was cool before and hot afterwards", "temperature of butter was cool before and hot afterwards", "temperature of butter was cool before and hot afterwards", "temperature of butter"]}
{"id": "﻿How to Make Pancakes|3", "answers": ["location of milk was in the fridge before and in the microwave afterwards", "location of butter was in the fridge before and in the microwave afterwards", "location of milk was in the fridge before and in the microwave afterwards", "location of butter was in the fridge before and in the microwave afterwards", "location of milk was in the fridge before and in the microwave afterwards", "location of butter was in the fridge before and in the microwave afterwards", "location of milk was in the fridge before and in the microwave afterwards", "location of butter was in the fridge before and in the bowl afterwards", "location of milk was in the fridge before and in the microwave afterwards", "location of butter was in fridge before and in bowl afterwards", "location of milk was in fridge before and in microwave afterwards", "location of butter was in fridge before and in bowl afterwards", "location of milk was in fridge before and in microwave afterwards", "location of butter was in fridge before and in bowl afterwards", "location of milk was in fridge before and in microwave afterwards", "location of milk was in fridge before and in microwave afterwards", "location of milk was in fridge before and in microwave afterwards", "location of butter was in fridge before and in bowl afterwards"]}
{"id": "﻿How to Make Pancakes|4", "answers": ["temperature of pan was cool before and hot afterwards", "temperature of pan was cool before and hot afterwards", "temperature of pan was cool before and hot afterwards", "temperature of stove was cool before and hot afterwards", "temperature of pan was cool before and hot afterwards", "temperature of stove was cool before and hot afterwards", "temperature of pan was cool before and hot afterwards", "temperature of stove was cool before and hot afterwards", "temperature of stove was cool before and hot afterwards", "temperature of stove was cool before and hot afterwards", "temperature of stove was cool before and hot afterwards", "temperature of stove was cold before and hot afterwards", "temperature of stove was cold before and hot afterwards", "temperature of stove was cold before and hot afterwards", "temperature of frying pan was cool before and hot afterwards", "temperature of frying pan was cool before and hot afterwards", "temperature of stove was cool before and hot afterwards", "temperature of pan was cool before and hot afterwards", "temperature of stove was cool before and hot afterwards", "temperature of pan was cool before and hot afterwards", "temperature of pan was cool before and hot afterwards", "temperature of stove was cool before and hot afterwards", "temperature of pan was cool before and hot afterwards", "temperature of pan was cool before and hot afterwards", "temperature of stove was cold before and hot afterwards", "temperature of stove"]}
{"id": "﻿How to Make Pancakes|5", "answers": ["location of butter was in a container before and on the pan afterwards", "location of butter was in a container before and on the pan afterwards", "location of butter was in fridge before and on pan afterwards", "temperature of frying pan was cool before and hot afterwards", "temperature of pan was cool before and hot afterwards", "temperature of butter was cool before and hot afterwards", "temperature of frying pan was cool before and hot afterwards", "temperature of pan was cool before and hot afterwards", "temperature of butter was cool before and hot afterwards", "temperature of frying pan was cool before and hot afterwards", "temperature of pan was cool before and hot afterwards", "weight of pan was lighter before and heavier afterwards", "location of butter was in fridge before and on pan afterwards", "temperature of pan was cool before and hot afterwards", "temperature of butter was cool before and hot afterwards", "temperature of frying pan was cool before and hot afterwards", "temperature of butter was cool before and hot afterwards", "temperature of frying pan was cool before and hot afterwards", "temperature of butter was cool before and hot afterwards", "temperature of frying pan was cool before and hot afterwards", "temperature of butter was cool before and hot afterwards", "temperature of frying pan was cool before and hot afterwards", "temperature of butter was cool before and hot afterwards", "temperature of frying pan was cool before"]}
{"id": "﻿How to Make Pancakes|6", "answers": ["state of pancake was raw before and cooked afterwards", "color of pancake was white before and golden afterwards", "temperature of pancake was cool before and hot afterwards", "temperature of pancake was cold before and hot afterwards", "temperature of pan was cool before and hot afterwards", "temperature of pancake was cold before and hot afterwards", "temperature of pancake was cold before and hot afterwards", "temperature of pancake was cold before and hot afterwards", "temperature of pancake was cold before and hot afterwards", "temperature of pancake was cold before and hot afterwards", "temperature of pancake was cold before and hot afterwards", "temperature of pancake was cold before and hot afterwards", "temperature of pancake was cold before and hot afterwards", "temperature of pancake was cold before and hot afterwards", "temperature of pancake was cold before and hot afterwards", "temperature of pancake was cold before and hot afterwards", "temperature of pancake was cold before and hot afterwards", "temperature of pancake was cold before and hot afterwards", "temperature of pancake was cold before and hot afterwards", "temperature of pancake was cold before and hot afterwards", "temperature of pancake was cold before and hot afterwards"]}
{"id": "﻿How to Make Pancakes|7", "answers": ["state of other side was uncooked before and cooked afterwards", "location of other side was in the pan before and on a plate afterwards", "location of plate was in the cupboard before and on the table afterwards", "location of pancake was in the pan before and on the plate afterwards", "location of plate was in the cupboard before and on the table afterwards", "location of pancake was in pan before and on plate afterwards", "location of pancake was in pan before and on plate afterwards", "location of pancake was in pan before and on plate afterwards", "location of pancake was in pan before and removed afterwards", "location of pancake was in pan before and on plate afterwards", "location of pancake was in pan before and removed afterwards", "location of pancake was in pan before and on plate afterwards", "temperature of pancake was hot before and cool afterwards"]}
{"id": "How to Unclog a Toilet|1", "answers": ["location of plunger was outside of toilet bowl before and inside of toilet bowl afterwards", "location of plunger was outside of toilet bowl before and inside of toilet bowl afterwards", "location of plunger was outside of toilet bowl before and inside of toilet bowl afterwards", "location of plunger was outside of toilet bowl before and inside of toilet bowl afterwards", "location of plunger was outside of toilet bowl before and inside of toilet bowl afterwards", "location of plunger was outside of toilet bowl before and inside of toilet bowl afterwards", "location of plunger was outside of toilet bowl before and inside of toilet bowl afterwards", "location of plunger was outside of toilet bowl before and inside of toilet bowl afterwards", "location of plunger was outside of toilet bowl before and inside of toilet bowl afterwards", "location of plunger was outside of toilet bowl before and inside of toilet bowl afterwards"]}
{"id": "How to Unclog a Toilet|2", "answers": ["power of plunger was off before and on afterwards", "state of hole was open before and closed afterwards", "location of plunger was outside of toilet before and in toilet afterwards", "pressure of hand was relaxed before and pumping afterwards", "motion of plunger was still before and moving afterwards", "location of plunger was in the hand before and in the toilet afterwards", "pressure of hand was relaxed before and pumping afterwards", "motion of plunger was still before and moving afterwards", "location of plunger was in hand before and in toilet afterwards", "pressure of hand was relaxed before and pumping afterwards", "pressure of hand was relaxed before and pumping afterwards", "motion of plunger was still before and moving afterwards"]}
{"id": "How to Unclog a Toilet|3", "answers": [""]}
{"id": "How to Make Rice Cakes|1", "answers": ["texture of rice was hard before and soft afterwards", "shape of rice was flat before and round afterwards", "moisture of rice was dry before and wet afterwards", "texture of rice was hard before and soft afterwards", "shape of rice was flat before and round afterwards", "moisture of rice was dry before and wet afterwards", "texture of rice was hard before and soft afterwards", "moisture of rice was dry before and wet afterwards", "texture of rice was hard before and soft afterwards", "shape of rice was flat before and round afterwards", "moisture of rice was dry before and wet afterwards", "texture of rice was hard before and soft afterwards", "moisture of rice was dry before and wet afterwards", "texture of rice was hard before and soft afterwards"]}
{"id": "How to Make Rice Cakes|2", "answers": ["moisture of rice cakes was wet before and dry afterwards", "dryness of rice cakes was wet before and dry afterwards", "wetness of rice cakes was wet before and dry afterwards", "wetness of rice cakes was wet before and dry afterwards", "temperature of cakes was warm before and cool afterwards", "temperature of cakes was warm before and cool afterwards", "temperature of rice cakes was warm before and cool afterwards", "temperature of cakes was warm before and cool afterwards", "temperature of rice cakes was warm before and cool afterwards", "temperature of rice cakes was warm before and cool afterwards", "temperature of rice cakes was warm before and cool afterwards", "wetness of rice cakes was wet before and dry afterwards", "temperature of rice cakes was warm before and cool afterwards", "temperature of rice cakes was warm before and cool afterwards", "temperature of rice cakes was warm before and cool afterwards", "temperature of rice cakes was warm before and cool afterwards", "dryness of rice cakes was dry before and wet afterwards"]}
{"id": "How to Make Rice Cakes|3", "answers": ["location of olive oil was in bottle before and in skillet afterwards", "location of olive oil bottle was in the pantry before and on the table afterwards", "location of olive oil was in bottle before and in pan afterwards", "weight of skillet was lighter before and heavier afterwards", "weight of olive oil bottle was heavier before and lighter afterwards", "fullness of skillet was less full before and more full afterwards", "weight of skillet was lighter before and heavier afterwards", "fullness of skillet was less full before and more full afterwards", "location of olive oil was in bottle before and in pan afterwards", "weight of skillet was lighter before and heavier afterwards", "location of olive oil was in bottle before and in skillet afterwards", "weight of skillet was lighter before and heavier afterwards", "volume of skillet was empty before and full afterwards", "weight of olive oil bottle was heavier before and lighter afterwards", "weight of skillet was lighter before and heavier afterwards", "location of olive oil was in a bottle before and in a skillet afterwards", "weight of skillet was lighter before and heavier afterwards", "weight of skillet was lighter before and heavier afterwards", "location of olive oil was in bottle before and in skillet afterwards"]}
{"id": "How to Make Rice Cakes|4", "answers": ["temperature of oil was cooler before and hotter afterwards", "temperature of oil was cooler before and hotter afterwards", "temperature of skillet was cool before and hot afterwards", "temperature of oil was cooler before and hotter afterwards", "temperature of oil was cooler before and hotter afterwards", "temperature of oil was cooler before and hotter afterwards", "temperature of oil was cooler before and hotter afterwards", "temperature of oil was cooler before and hotter afterwards", "temperature of oil was cooler before and hotter afterwards", "temperature of oil was cooler before and hotter afterwards", "temperature of oil was cooler before and hotter afterwards", "temperature of oil was cooler before and hotter afterwards", "temperature of oil was cooler before and hotter afterwards", "temperature of oil was cooler before and hotter afterwards", "temperature of oil was cooler before and hotter afterwards", "temperature of oil was cooler before and hotter afterwards", "temperature of oil was cooler before and hotter afterwards", "temperature of oil was cooler before and hotter afterwards", "temperature of oil was cooler before and hotter afterwards", "temperature of oil was cooler before and hotter afterwards", "temperature of oil was cooler before and hotter afterwards", "temperature of oil was cooler before and hotter afterwards", "temperature of oil was cooler before and hotter afterwards"]}
{"id": "How to Make Rice Cakes|5", "answers": ["location of rice cakes was in bowl before and in skillet afterwards", "location of rice cakes was in bowl before and in oil afterwards", "temperature of rice cakes was cool before and hot afterwards", "temperature of rice cakes was cool before and hot afterwards", "weight of skillet was lighter before and heavier afterwards", "volume of skillet was empty before and full afterwards", "temperature of rice cakes was cool before and hot afterwards", "temperature of rice cakes was cool before and hot afterwards", "temperature of rice cakes was cool before and hot afterwards", "temperature of rice cakes was cool before and hot afterwards", "location of rice cakes was in bowl before and in oil afterwards", "temperature of rice cakes was cool before and hot afterwards", "location of rice cakes was in bowl before and in oil afterwards", "temperature of rice cakes was cool before and hot afterwards", "temperature of rice cakes was cold before and hot afterwards"]}
{"id": "How to Make Rice Cakes|6", "answers": ["texture of rice cakes was soft before and crispy afterwards", "location of rice cakes was in oil before and out of oil afterwards", "temperature of rice cakes was hot before and cooler afterwards", "temperature of rice cakes was hot before and cooler afterwards", "temperature of rice cakes was hot before and cooler afterwards", "temperature of rice cakes was hot before and cooler afterwards", "temperature of rice cakes was hot before and cooler afterwards", "temperature of rice cakes was hot before and cooler afterwards", "temperature of rice cakes was hot before and cooler afterwards", "temperature of rice cakes was hot before and cooler afterwards", "temperature of rice cakes was hot before and cooler afterwards", "temperature of rice cakes was hot before and cooler afterwards", "temperature of rice cakes was hot before and cooler afterwards", "temperature of rice cakes was hot before and hotter afterwards"]}
{"id": "How to Make Rice Cakes|7", "answers": ["location of rice cakes was in the pan before and on a plate afterwards", "location of rice cakes was in the pan before and in the serving dish afterwards", "location of rice cakes was in the pan before and on a plate afterwards", "location of rice cakes was in the oil before and out of the oil afterwards", "location of rice cakes was in the pan before and on a plate afterwards", "location of rice cakes was in the oil before and out of the oil afterwards", "weight of serving dish was lighter before and heavier afterwards", "cleanness of serving dish was clean before and dirty afterwards", "location of rice cakes was in the pan before and on a plate afterwards", "weight of serving dish was lighter before and heavier afterwards", "volume of pan was full before and empty afterwards"]}
{"id": "How to Revive a Dying Aloe Vera Plant|1", "answers": ["state of leaves was uninspected before and examined afterwards", "location of person was in the garden before and in the house afterwards", "state of leaves was whole before and examined afterwards", "location of person was in the garden before and in the house afterwards"]}
{"id": "How to Revive a Dying Aloe Vera Plant|2", "answers": ["state of soil was dry before and moist afterwards", "location of water was in hose before and in soil afterwards", "location of water was in hose before and in soil afterwards", "moisture of soil was dry before and moist afterwards", "location of water was in hose before and in soil afterwards", "moisture of soil was dry before and moist afterwards", "location of water was in faucet before and in soil afterwards"]}
{"id": "How to Revive a Dying Aloe Vera Plant|3", "answers": ["location of water was in hose before and in soil afterwards", "wetness of soil was dry before and wet afterwards", "location of water was in hose before and in soil afterwards", "moisture of soil was dry before and moist afterwards", "moisture of soil was dry before and moist afterwards", "location of water was in hose before and in soil afterwards", "moisture of soil was dry before and moist afterwards", "location of water was in faucet before and in soil afterwards"]}
{"id": "How to Revive a Dying Aloe Vera Plant|4", "answers": ["location of water was in hose before and in soil afterwards", "wetness of soil was dry before and wet afterwards", "location of water was in hose before and in soil afterwards", "location of water was in faucet before and in soil afterwards", "location of water was in hose before and in plant afterwards", "moisture of soil was dry before and moist afterwards", "location of water was in hose before and in plant afterwards", "moisture of soil was dry before and wet afterwards"]}
{"id": "How to Clean White Shoes|1", "answers": ["moisture of bowl was dry before and wet afterwards", "location of soap was in bottle before and in bowl afterwards", "location of water was in faucet before and in bowl afterwards", "location of dish soap was in bottle before and in bowl afterwards", "location of dish soap was in bottle before and in water afterwards", "location of dish soap was in bottle before and in bowl afterwards", "location of water was in pipes before and in bowl afterwards", "location of dish soap was in bottle before and in bowl afterwards", "location of dish soap was in bottle before and in bowl afterwards", "location of dish soap was in bottle before and in water afterwards", "location of dish soap was in bottle before and in bowl afterwards", "location of dish soap was in bottle before and in bowl afterwards", "location of dish soap was in bottle before and in bowl afterwards", "location of dish soap was in bottle before and in bowl afterwards", "location of warm water was in faucet before and in bowl afterwards", "location of dish soap was in bottle before and in bowl afterwards", "location of dish soap was in bottle before and in bowl afterwards", "location of dish soap was in bottle before and in bowl afterwards"]}
{"id": "How to Clean White Shoes|2", "answers": ["cleanness of soles was dirty before and clean afterwards", "location of eraser was in the drawer before and on the floor afterwards", "cleanness of rubber pieces was dirty before and clean afterwards", "location of soap was in the bowl before and on the floor afterwards", "cleanness of soles was dirty before and clean afterwards", "cleanness of eraser was clean before and dirty afterwards", "location of eraser was in the drawer before and on the floor afterwards", "cleanness of soles was dirty before and clean afterwards", "cleanness of magic eraser was clean before and dirty afterwards", "location of magic eraser was in the drawer before and on the floor afterwards", "location of soap was in the bowl before and on the soles afterwards", "cleanness of magic eraser was clean before and dirty afterwards", "cleanness of soles was dirty before and clean afterwards", "location of eraser was in the drawer before and on the floor afterwards"]}
{"id": "How to Clean White Shoes|3", "answers": ["cleanness of brush was clean before and dirty afterwards", "cleanness of stains was on shoes before and removed afterwards", "cleanness of brush was clean before and dirty afterwards", "cleanness of brush was clean before and dirty afterwards", "cleanness of brush was clean before and dirty afterwards", "cleanness of brush was clean before and dirty afterwards", "cleanness of brush was clean before and dirty afterwards", "cleanness of brush was clean before and dirty afterwards", "cleanness of brush was clean before and dirty afterwards", "cleanness of brush was clean before and dirty afterwards", "cleanness of brush was clean before and dirty afterwards", "cleanness of brush was clean before and dirty afterwards", "cleanness of brush was clean before and dirty afterwards", "cleanness of stains was dirty before and clean afterwards", "cleanness of brush was clean before and dirty afterwards", "cleanness of brush was clean before and dirty afterwards", "cleanness of brush was clean before and dirty afterwards", "cleanness of brush was clean before and dirty afterwards", "cleanness of brush was clean before and dirty afterwards"]}
{"id": "How to Clean White Shoes|4", "answers": ["location of water was in sink before and on floor afterwards", "wetness of floor was wet before and dry afterwards", "wetness of towel was dry before and wet afterwards", "wetness of floor was wet before and dry afterwards", "location of excess water was in sink before and on floor afterwards", "wetness of towel was dry before and wet afterwards", "wetness of floor was wet before and dry afterwards", "wetness of towel was dry before and wet afterwards", "location of excess water was in sink before and on floor afterwards", "wetness of towel was dry before and wet afterwards", "wetness of floor was wet before and dry afterwards", "wetness of towel was dry before and wet afterwards"]}
{"id": "How to Clean White Shoes|5", "answers": ["state of shoes was wet before and dry afterwards", "location of shoes was in the closet before and on the floor afterwards", "location of shoes was in the closet before and on the floor afterwards", "location of shoes was in the closet before and on the floor afterwards", "state of shoes was wet before and dry afterwards", "location of shoes was in closet before and on the floor afterwards", "location of shoes was in closet before and on the floor afterwards", "location of shoes was in closet before and on the floor afterwards", "location of shoes was in closet before and on the floor afterwards", "location of shoes was in closet before and on the floor afterwards"]}
{"id": "How to Fold a Towel Swan|1", "answers": ["location of towel was in drawer before and on the counter afterwards", "state of towel was folded before and flat afterwards", "location of towel was in the drawer before and on the counter afterwards", "orientation of towel was folded before and flat afterwards", "location of towel was in the drawer before and on the counter afterwards", "state of counter was bare before and covered with towel afterwards", "state of towel was folded before and flat afterwards", "location of towel was in the drawer before and on the counter afterwards"]}
{"id": "How to Fold a Towel Swan|2", "answers": ["shape of towel was flat before and folded afterwards", "shape of towel was flat before and folded afterwards", "shape of towel was flat before and folded afterwards", "shape of towel was flat before and folded afterwards", "shape of towel was flat before and folded afterwards"]}
{"id": "How to Fold a Towel Swan|3", "answers": ["shape of towel was flat before and rolled afterwards", "shape of edges was straight before and folded in afterwards", "shape of towel was flat before and rolled afterwards", "shape of towel was flat before and rolled afterwards"]}
{"id": "How to Fold a Towel Swan|4", "answers": ["shape of towel was flat before and rolled afterwards", "shape of towel was flat before and rolled up afterwards", "shape of towel was flat before and rolled up afterwards", "shape of towel was flat before and rolled up afterwards", "location of towel was on the table before and in the hand afterwards", "shape of towel was flat before and rolled afterwards"]}
{"id": "How to Fold a Towel Swan|5", "answers": ["shape of towel was flat before and curved afterwards", "shape of towel was straight before and curved afterwards", "location of towel was on the table before and on the floor afterwards", "shape of towel was flat before and curved afterwards", "location of towel was on the table before and on the floor afterwards", "shape of towel was flat before and curved afterwards"]}
{"id": "How to Make a Vodka Watermelon|1", "answers": ["location of vodka bottle's cap was on the bottle before and off the bottle afterwards", "location of vodka bottle's cap was on the bottle before and off the bottle afterwards", "moisture of watermelon was dry before and wet afterwards", "moisture of rind was dry before and wet afterwards", "moisture of vodka bottle was dry before and wet afterwards", "moisture of rind was dry before and wet afterwards", "moisture of vodka bottle cap was dry before and wet afterwards", "location of vodka bottle cap was on the bottle before and off the bottle afterwards", "moisture of watermelon was dry before and wet afterwards", "moisture of vodka bottle was dry before and wet afterwards", "location of vodka bottle cap was on the bottle cap before and off the bottle cap afterwards", "location of vodka bottle cap was on the bottle before and off the bottle afterwards", "moisture of vodka bottle was dry before and wet afterwards"]}
{"id": "How to Make a Vodka Watermelon|2", "answers": ["shape of watermelon was whole before and cut afterwards", "shape of watermelon was whole before and cut afterwards", "location of knife was in the drawer before and on the counter afterwards", "shape of watermelon was whole before and cut afterwards", "size of watermelon was whole before and cut afterwards", "shape of watermelon was whole before and cut afterwards", "location of knife was in the drawer before and on the counter afterwards", "cleanness of knife was clean before and dirty afterwards", "cleanness of cutting board was clean before and dirty afterwards", "cleanness of vodka bottle cap was clean before and dirty afterwards", "location of vodka bottle cap was on the vodka bottle before and off the vodka bottle afterwards", "cleanness of watermelon was clean before and dirty afterwards", "cleanness of vodka bottle cap was clean before and dirty afterwards", "shape of watermelon was whole before and cut afterwards"]}
{"id": "How to Make a Vodka Watermelon|3", "answers": ["location of skewer was in the drawer before and on the watermelon afterwards", "shape of skewer was whole before and pierced afterwards", "location of skewer was in the drawer before and on the watermelon afterwards", "location of skewer was in drawer before and on watermelon afterwards", "location of skewer was in drawer before and on watermelon afterwards", "state of watermelon was whole before and pierced afterwards", "location of skewer was in the drawer before and on the watermelon afterwards", "location of skewer was in the drawer before and on the watermelon afterwards", "location of skewer was in the drawer before and on the watermelon afterwards", "location of skewer was in the drawer before and on the watermelon afterwards", "state of watermelon was whole before and pierced afterwards"]}
{"id": "How to Make a Vodka Watermelon|4", "answers": ["location of vodka was in bottle before and in watermelon afterwards", "location of vodka was in bottle before and in watermelon afterwards", "volume of watermelon was empty before and full afterwards", "location of vodka was in bottle before and in watermelon afterwards", "weight of watermelon was lighter before and heavier afterwards", "volume of watermelon was empty before and full afterwards", "weight of watermelon was lighter before and heavier afterwards", "location of vodka was in bottle before and in watermelon afterwards", "weight of watermelon was lighter before and heavier afterwards", "location of vodka was in bottle before and in watermelon afterwards", "moisture of vodka bottle was dry before and wet afterwards", "location of vodka was in bottle before and in watermelon afterwards", "volume of watermelon was empty before and full afterwards", "volume of bottle was full before and empty afterwards"]}
{"id": "How to Make a Vodka Watermelon|5", "answers": ["location of vodka was in bottle before and in watermelon afterwards", "location of vodka was in bottle before and in watermelon afterwards", "moisture of watermelon was dry before and wet afterwards", "moisture of funnel was dry before and wet afterwards", "location of vodka was in bottle before and in watermelon afterwards", "moisture of watermelon was dry before and wet afterwards", "volume of watermelon was empty before and full afterwards", "moisture of watermelon was dry before and wet afterwards", "location of vodka was in bottle before and in watermelon afterwards"]}
{"id": "How to Make a Vodka Watermelon|6", "answers": ["location of vodka was in watermelon before and in refrigerator afterwards", "temperature of watermelon was warm before and cold afterwards", "location of vodka was in watermelon before and in refrigerator afterwards", "temperature of watermelon was room temperature before and cold afterwards", "location of vodka was in watermelon before and in refrigerator afterwards", "temperature of watermelon was room temperature before and cold afterwards", "location of vodka was in watermelon before and in refrigerator afterwards", "temperature of watermelon was room temperature before and cold afterwards", "location of vodka was in watermelon before and in refrigerator afterwards", "temperature of watermelon was room temperature before and cold afterwards", "location of vodka was in watermelon before and in refrigerator afterwards", "location of vodka was in watermelon before and in refrigerator afterwards", "location of vodka was in watermelon before and in refrigerator afterwards", "location of vodka was in watermelon before and in refrigerator afterwards"]}
{"id": "How to Make a Vodka Watermelon|7", "answers": ["location of vodka was in watermelon before and in glass afterwards", "temperature of vodka was cold before and warm afterwards", "location of vodka watermelon drink was in fridge before and on table afterwards", "temperature of vodka was cold before and warm afterwards", "temperature of watermelon was cold before and warm afterwards", "location of vodka watermelon drink was in fridge before and on table afterwards", "temperature of vodka was cold before and warm afterwards", "temperature of watermelon was cold before and warm afterwards", "temperature of vodka was cold before and warm afterwards", "temperature of watermelon was cold before and warm afterwards", "location of vodka was in watermelon before and in glass afterwards", "temperature of watermelon was cold before and warm afterwards"]}
{"id": "How to Make Egg White Omelet|1", "answers": ["temperature of skillet was cool before and hot afterwards", "location of olive oil was in bottle before and in skillet afterwards", "temperature of skillet was cool before and hot afterwards", "temperature of skillet was cool before and hot afterwards", "temperature of skillet was cool before and hot afterwards", "temperature of skillet was cool before and hot afterwards", "temperature of skillet was cool before and hot afterwards", "temperature of olive oil was room temperature before and hot afterwards", "location of olive oil was in bottle before and in skillet afterwards", "temperature of skillet was cool before and hot afterwards", "temperature of skillet was cool before and hot afterwards", "temperature of skillet was cool before and hot afterwards", "temperature of skillet was cool before and hot afterwards", "temperature of skillet was cool before and hot afterwards"]}
{"id": "How to Make Egg White Omelet|2", "answers": ["state of peppers was raw before and sautéed afterwards", "temperature of onions was cool before and hot afterwards", "state of onions was raw before and sautéed afterwards", "temperature of skillet was cool before and hot afterwards", "location of peppers was in a container before and in the pan afterwards", "temperature of skillet was cool before and hot afterwards", "temperature of onions was cool before and hot afterwards", "temperature of skillet was cool before and hot afterwards", "location of onions was in a container before and in the skillet afterwards", "temperature of skillet was cool before and hot afterwards", "temperature of peppers was cool before and hot afterwards", "temperature of skillet was cool before and hot afterwards", "temperature of onions was cool before and hot afterwards", "temperature of peppers was cool before and hot afterwards", "temperature of skillet was cool before and hot afterwards"]}
{"id": "How to Make Egg White Omelet|3", "answers": ["temperature of ham was cool before and hot afterwards", "state of tomato was whole before and chopped afterwards", "location of tomato was in a package before and in the pan afterwards", "location of ham was in a package before and in the pan afterwards", "composition of tomato and ham was separate before and mixed afterwards", "location of ham was in the fridge before and in the pan afterwards", "location of tomato was in a container before and in the pan afterwards", "location of tomato was in fridge before and in skillet afterwards", "location of ham was in the fridge before and in the skillet afterwards", "temperature of ham was cold before and hot afterwards", "temperature of skillet was cool before and hot afterwards", "temperature of tomato was cool before and hot afterwards", "temperature of ham was cool before and hot afterwards", "temperature of skillet was cool before and hot afterwards", "temperature of ingredients was cool before and hot afterwards", "temperature of tomato was cool before and hot afterwards", "temperature of ingredients was cool before and hot afterwards", "temperature of ingredients was cooler before and hotter afterwards"]}
{"id": "How to Make Egg White Omelet|4", "answers": ["temperature of skillet was hot before and warm afterwards", "location of mixture was in skillet before and in bowl afterwards", "location of mixture was in skillet before and in bowl afterwards", "location of mixture was in skillet before and in bowl afterwards", "temperature of skillet was hot before and cool afterwards", "temperature of burner was on high before and on medium afterwards", "temperature of skillet was hot before and cool afterwards", "temperature of bowl was cool before and hot afterwards", "temperature of skillet was hot before and cool afterwards", "temperature of bowl was cool before and hot afterwards", "temperature of skillet was hot before and cool afterwards", "temperature of skillet was hot before and cool afterwards", "temperature of burner was on high before and on medium afterwards", "temperature of skillet was hot before and cool afterwards", "temperature of burner was on high before and on medium afterwards", "temperature of skillet was hot before and cool afterwards", "temperature of mixture was hot before and cool afterwards"]}
{"id": "How to Make Egg White Omelet|5", "answers": ["cleanness of whisk was clean before and dirty afterwards", "location of egg whites was in a container before and in a bowl afterwards", "state of egg whites was separate before and whisked afterwards", "location of egg whites was in a bowl before and in the skillet afterwards", "state of egg yolks was intact before and beaten afterwards", "state of egg whites was unmixed before and whisked afterwards", "state of egg whites was unmixed before and mixed afterwards", "location of egg yolks was in a bowl before and in the skillet afterwards", "state of egg whites was unmixed before and whisked afterwards", "state of egg yolks was unmixed before and whisked afterwards", "location of egg whites was in a bowl before and in the skillet afterwards", "location of mixture was in a bowl before and in the skillet afterwards", "location of mixture was in a bowl before and in the skillet afterwards", "location of mixture was in bowl before and in skillet afterwards", "location of mixture was in bowl before and in skillet afterwards", "location of mixture was in bowl before and in skillet afterwards", "location of mixture was in bowl before and in skillet afterwards", "location of mixture was in bowl before and in skillet afterwards", "location of mixture was in bowl before and in skillet afterwards"]}
{"id": "How to Make Egg White Omelet|6", "answers": ["temperature of whites was cool before and hot afterwards", "temperature of whites was cool before and hot afterwards", "state of whites was raw before and cooked afterwards", "temperature of egg whites was cool before and hot afterwards", "temperature of skillet was cool before and hot afterwards", "temperature of egg whites was cool before and hot afterwards", "temperature of skillet was cool before and hot afterwards", "temperature of whites was cool before and hot afterwards", "temperature of eggs was cool before and hot afterwards", "temperature of skillet was cool before and hot afterwards", "temperature of eggs was cool before and hot afterwards", "temperature of eggs was cold before and hot afterwards", "temperature of eggs was cold before and hot afterwards", "temperature of mixture was cooler before and hotter afterwards", "state of mixture was raw before and cooked afterwards", "temperature of eggs was cold before and hot afterwards", "temperature of mixture was cooler before and hotter afterwards", "temperature of eggs was cold before and hot afterwards", "temperature of mixture was cooler before and hotter afterwards", "temperature of mixture was cooler before and hotter afterwards", "temperature of eggs was cold before and hot afterwards", "temperature of mixture was cooler before and hotter afterwards", "temperature of eggs was cold before and hot afterwards", "temperature of mixture was cooler before and hotter afterwards"]}
{"id": "How to Make Egg White Omelet|7", "answers": ["temperature of skillet was hot before and cool afterwards", "temperature of omelet was hot before and cool afterwards", "temperature of burner was on before and off afterwards", "temperature of egg whites was hot before and cool afterwards", "temperature of omelet was hot before and cool afterwards", "temperature of skillet was hot before and cool afterwards", "temperature of omelet was hot before and cool afterwards", "temperature of egg whites was hot before and cool afterwards", "temperature of omelet was hot before and cool afterwards", "temperature of omelet was hot before and cool afterwards", "temperature of omelet was hot before and cool afterwards", "temperature of egg whites was hot before and cool afterwards", "temperature of mixture was hot before and cool afterwards", "temperature of mixture was hot before and cool afterwards", "temperature of mixture was hot before and cool afterwards", "temperature of skillet was hot before and cool afterwards", "temperature of mixture was hot before and cool afterwards", "temperature of egg whites was hot before and cool afterwards", "temperature of mixture was hot before and cool afterwards", "temperature of egg whites was hot before and hot afterwards", "temperature of mixture was hot before and cool afterwards", "temperature of skillet was hot before and cool afterwards", "temperature of mixture was hot before and cool afterwards", "temperature of mixture was hot before and cool"]}
{"id": "How to Make Egg White Omelet|8", "answers": ["temperature of omelet was hot before and cooler afterwards", "shape of omelet was flat before and folded afterwards", "location of omelet was in skillet before and on plate afterwards", "shape of omelet was flat before and folded afterwards", "state of omelet was uncooked before and cooked afterwards", "state of omelet was uncooked before and cooked afterwards", "state of spatula was flat before and used to fold afterwards", "state of omelet was uncooked before and cooked afterwards", "location of spatula was in drawer before and in hand afterwards", "state of omelet was uncooked before and cooked afterwards", "state of omelet was raw before and cooked afterwards", "state of omelet was uncooked before and cooked afterwards", "state of omelet was raw before and cooked afterwards", "temperature of omelet was hot before and cooler afterwards", "temperature of omelet was hot before and cooler afterwards", "state of omelet was raw before and cooked afterwards"]}
{"id": "How to Cook BBQ Ribs|1", "answers": ["state of ribs was considered before and chosen afterwards", "location of ribs was at the store before and at home afterwards", "ownership of ribs was at the store before and purchased afterwards", "location of ribs was at the store before and at your home afterwards", "state of ribs was considered before and purchased afterwards"]}
{"id": "How to Cook BBQ Ribs|2", "answers": ["state of ingredients was separate before and mixed afterwards", "composition of ingredients was separate before and mixed afterwards", "location of ingredients was in their place before and in bowl afterwards", "state of ingredients was raw before and cooked afterwards", "composition of meat was whole before and cut up afterwards", "location of spices was in spice container before and in meat afterwards", "location of spices was in spice container before and in meat afterwards", "location of spices was in cabinet before and on meat afterwards", "location of spices was in cabinet before and on meat afterwards", "location of spices was in cabinet before and on meat afterwards", "location of spices was in spice box before and on meat afterwards", "location of spices was in cabinet before and on meat afterwards", "location of rub was in a container before and on the meat afterwards"]}
{"id": "How to Cook BBQ Ribs|3", "answers": ["state of mop was unmade before and made afterwards", "location of mop was in pantry before and on grill afterwards", "state of mop was unmade before and made afterwards", "location of mop was in the pantry before and on the grill afterwards", "location of mop was in the drawer before and on the grill afterwards", "state of mop was unmade before and made afterwards", "location of mop was in the drawer before and on the grill afterwards", "state of mop was unmade before and made afterwards", "location of mop was in the drawer before and on the grill afterwards", "state of mop was unmade before and made afterwards"]}
{"id": "How to Cook BBQ Ribs|4", "answers": ["location of ribs was on cutting board before and on tray afterwards", "shape of ribs was whole before and trimmed afterwards", "location of rub was in container before and on ribs afterwards", "state of ribs was raw before and cooked afterwards", "state of ribs was uncut before and cut afterwards", "location of trimming was in hand before and on ribs afterwards", "state of ribs was bare before and covered in rub afterwards", "location of rub was in container before and on ribs afterwards", "cleanness of cutting board was clean before and dirty afterwards", "state of ribs was raw before and cooked afterwards", "state of ribs was uncut before and trimmed afterwards"]}
{"id": "How to Cook BBQ Ribs|5", "answers": ["temperature of ribs was cold before and hot afterwards", "location of spare ribs was in the fridge before and on the grill afterwards", "temperature of ribs was cold before and hot afterwards", "temperature of grill was cool before and hot afterwards", "temperature of spare ribs was cold before and hot afterwards", "temperature of grill was cool before and hot afterwards", "temperature of spare ribs was cold before and hot afterwards", "temperature of spare ribs was cold before and hot afterwards", "temperature of grill was cool before and hot afterwards", "temperature of spare ribs was cold before and hot afterwards", "temperature of spare ribs was cold before and hot afterwards", "temperature of grill was cool before and hot afterwards", "temperature of spare ribs was cold before and hot afterwards", "temperature of spare ribs was cold before and hot afterwards", "temperature of spare ribs was cooler before and hotter afterwards"]}
{"id": "How to Make Kraft Macaroni and Cheese|1", "answers": ["temperature of water was cool before and hot afterwards", "state of water was still before and boiling afterwards", "temperature of water was cold before and hot afterwards", "temperature of saucepan was cool before and hot afterwards", "temperature of water was cold before and hot afterwards", "temperature of saucepan was cool before and hot afterwards", "temperature of water was cold before and hot afterwards", "temperature of water was cold before and boiling afterwards", "temperature of water was cool before and hot afterwards", "temperature of water was cold before and hot afterwards", "temperature of water was cold before and hot afterwards", "temperature of water was cold before and hot afterwards", "temperature of water was cold before and hot afterwards", "temperature of water was cold before and hot afterwards", "temperature of water was cold before and hot afterwards"]}
{"id": "How to Make Kraft Macaroni and Cheese|2", "answers": ["temperature of macaroni was cool before and hot afterwards", "texture of macaroni was hard before and soft afterwards", "state of macaroni was uncooked before and cooked afterwards", "state of macaroni was raw before and cooked afterwards", "temperature of macaroni was cold before and hot afterwards", "texture of macaroni was hard before and soft afterwards", "state of macaroni was uncooked before and cooked afterwards", "temperature of macaroni was cold before and hot afterwards", "temperature of water was cold before and hot afterwards", "temperature of macaroni was cold before and hot afterwards", "temperature of macaroni was cold before and hot afterwards", "temperature of macaroni was cold before and hot afterwards", "temperature of water was cold before and hot afterwards", "state of macaroni was uncooked before and cooked afterwards", "temperature of macaroni was cold before and hot afterwards", "temperature of water was cold before and hot afterwards"]}
{"id": "How to Make Kraft Macaroni and Cheese|3", "answers": ["state of macaroni was wet before and dry afterwards", "location of water was in macaroni before and in sink afterwards", "state of macaroni was wet before and drained afterwards", "location of water was in macaroni before and in drain afterwards", "location of water was in macaroni before and in drain afterwards", "moisture of macaroni was wet before and dry afterwards", "volume of macaroni was full before and empty afterwards", "weight of macaroni was heavier before and lighter afterwards", "cleanness of macaroni was dirty before and clean afterwards", "weight of saucepan was heavier before and lighter afterwards", "volume of saucepan was full before and empty afterwards", "weight of macaroni was heavier before and lighter afterwards", "location of water was in macaroni before and in drain afterwards"]}
{"id": "How to Make Kraft Macaroni and Cheese|4", "answers": ["location of macaroni was in pot before and in pan afterwards", "location of cheese sauce mix was in container before and in pot afterwards", "location of macaroni was in pot before and in pan afterwards", "location of milk was in container before and in pot afterwards", "location of macaroni", "margarine", "and cheese mix was in the pot before and now in the saucepan afterwards", "location of macaroni", "margarine", "and cheese mix was in the pot before and now in the saucepan afterwards", "location of macaroni", "margarine", "and cheese mix was in the pot before and now in the saucepan afterwards", "location of macaroni", "margarine", "and cheese mix was in the pot before and now in the saucepan afterwards", "location of macaroni", "margarine", "and cheese mix was in the pot before and now drained afterwards", "location of macaroni", "margarine", "and cheese mix was in pot before and drained afterwards", "location of macaroni", "margarine", "and cheese mix was in pot before and drained afterwards", "location of milk was in container before and in pot afterwards", "location of cheese sauce mix was in container before and in pot afterwards", "location of milk was in container before and in pot afterwards", "location of"]}
{"id": "How to Make Kraft Macaroni and Cheese|5", "answers": ["location of spoon was in the drawer before and in the bowl afterwards", "texture of macaroni was hard before and soft afterwards", "texture of ingredients was separated before and mixed afterwards", "texture of cheese was hard before and soft afterwards", "location of milk was in the fridge before and in the saucepan afterwards", "location of cheese was in the fridge before and in the saucepan afterwards", "location of macaroni was in the saucepan before and in a bowl afterwards", "location of milk was in the fridge before and in the saucepan afterwards", "location of cheese was in the fridge before and in the saucepan afterwards", "location of margarine was in the fridge before and in the saucepan afterwards", "location of macaroni was in the saucepan before and in a bowl afterwards", "location of milk was in the fridge before and in the saucepan afterwards", "location of butter was in the fridge before and in the saucepan afterwards", "location of milk was in the fridge before and in the saucepan afterwards", "location of macaroni was in the saucepan before and in a bowl afterwards", "location of cheese was in the fridge before and in the saucepan afterwards", "location of macaroni was in saucepan before and in bowl afterwards", "location of milk was in the fridge before"]}
{"id": "How to Make Kraft Macaroni and Cheese|6", "answers": ["location of macaroni was in pan before and in bowl afterwards", "location of macaroni was in pan before and in refrigerator afterwards", "location of macaroni was in pan before and in bowl afterwards", "location of macaroni was in pan before and in fridge afterwards", "location of macaroni was in pan before and in bowl afterwards", "location of macaroni was in pan before and in fridge afterwards", "location of macaroni was in pan before and in fridge afterwards", "location of cheese was in pan before and in bowl afterwards", "location of macaroni was in pan before and in fridge afterwards", "location of macaroni was in pan before and in fridge afterwards", "location of cheese was in pan before and in bowl afterwards", "location of macaroni was in pan before and in fridge afterwards", "location of cheese was in pan before and in bowl afterwards", "location of macaroni was in pan before and in fridge afterwards", "location of macaroni was in pan before and in fridge afterwards"]}
{"id": "﻿Charge an iPhone|1", "answers": ["location of charger cable was in the drawer before and in the hand afterwards", "location of charger cable was in the drawer before and in the hand afterwards", "state of charger cable was unplugged before and plugged in afterwards", "state of charger cable was unplugged before and plugged in afterwards", "location of charger cable was in the drawer before and in the hand afterwards", "state of charger was unplugged before and plugged in afterwards"]}
{"id": "﻿Charge an iPhone|2", "answers": ["location of usb port was unknown before and found afterwards", "location of usb port was in the drawer before and in the room afterwards", "location of usb port was in the drawer before and in the room afterwards", "location of usb port was in closet before and in room afterwards", "location of usb port was in kitchen before and in bedroom afterwards", "location of usb port was in drawer before and on table afterwards"]}
{"id": "﻿Charge an iPhone|3", "answers": ["location of cable was loose before and plugged in afterwards", "state of usb port was empty before and plugged in afterwards", "state of usb port was unplugged before and plugged in afterwards", "state of cable was unplugged before and plugged in afterwards", "state of usb port was empty before and plugged in afterwards", "location of cable was loose before and plugged in afterwards", "state of usb port was unplugged before and plugged in afterwards", "state of cable was unplugged before and plugged in afterwards"]}
{"id": "﻿Charge an iPhone|4", "answers": ["state of cable was unattached before and attached afterwards", "location of cable was on the table before and on the phone afterwards", "location of cable was unattached before and attached afterwards", "location of cable was on the table before and attached to the phone afterwards", "state of cable was unattached before and attached afterwards", "location of cable was unattached before and attached afterwards", "location of cable was unattached before and attached to phone afterwards"]}
{"id": "﻿Charge an iPhone|5", "answers": ["state of charging icon was absent before and present afterwards", "state of charging was off before and on afterwards", "state of charging was absent before and present afterwards", "state of charging was off before and on afterwards", "state of charging was absent before and present afterwards", "state of charging was off before and on afterwards"]}
{"id": "﻿Charge an iPhone|6", "answers": ["state of usb port was plugged in before and unplugged afterwards", "state of usb port was plugged in before and unplugged afterwards", "state of usb port was plugged in before and unplugged afterwards", "state of charger cable was unplugged before and plugged in afterwards", "state of iphone was uncharged before and charged afterwards", "state of usb port was unselected before and selected afterwards"]}
{"id": "Cut Iceberg Lettuce|1", "answers": ["location of core was in the machine before and out of the machine afterwards", "location of core was in the machine before and removed afterwards", "location of core was in machine before and out of machine afterwards", "location of core was in machine before and out of machine afterwards", "location of core was in machine before and out afterwards", "location of core was in machine before and out afterwards", "location of core was in machine before and out afterwards"]}
{"id": "Cut Iceberg Lettuce|2", "answers": ["location of leaves was on the core before and off the core afterwards", "location of leaves was on the plant before and off the plant afterwards", "location of leaves was on the plant before and removed afterwards", "location of leaves was on the plant before and off the plant afterwards", "location of leaves was on the plant before and removed afterwards", "location of leaves was attached to the plant before and off the plant afterwards", "location of leaves was on the plant before and off the plant afterwards", "location of leaves was on the plant before and off the plant afterwards"]}
{"id": "Cut Iceberg Lettuce|3", "answers": ["shape of head was whole before and cut in half afterwards", "size of head was whole before and cut in half afterwards", "composition of head was whole before and cut in half afterwards", "size of head was whole before and cut in half afterwards", "shape of head was whole before and cut in half afterwards"]}
{"id": "Open a Coconut|1", "answers": ["state of oven was off before and on afterwards", "temperature of oven was cold before and hot afterwards", "temperature of oven was cold before and hot afterwards", "temperature of oven was cold before and hot afterwards", "temperature of oven was cold before and hot afterwards", "temperature of oven was cold before and hot afterwards", "temperature of oven was cold before and hot afterwards", "temperature of oven was cold before and hot afterwards", "temperature of oven was cold before and hot afterwards", "temperature of oven was cold before and hot afterwards", "temperature of oven was cold before and hot afterwards", "temperature of oven was cold before and preheated afterwards", "temperature of oven was cold before and hot afterwards"]}
{"id": "Open a Coconut|2", "answers": ["location of coconut was on counter before and in oven afterwards", "location of coconut was on counter before and in oven afterwards", "temperature of coconut was cool before and hot afterwards", "temperature of oven was cold before and hot afterwards", "temperature of coconut was cool before and hot afterwards", "temperature of pan was cool before and hot afterwards", "temperature of coconut was cool before and hot afterwards", "temperature of coconut was cool before and hot afterwards", "temperature of coconut was cool before and hot afterwards", "temperature of coconut was cool before and hot afterwards", "location of coconut was on counter before and in oven afterwards", "temperature of coconut was cool before and hot afterwards", "temperature of coconut was room temperature before and hot afterwards"]}
{"id": "Open a Coconut|3", "answers": ["location of towel was on the counter before and on the counter afterwards", "location of coconut was in oven before and on counter afterwards", "location of coconut was in oven before and on counter afterwards", "location of towel was in drawer before and on counter afterwards", "location of coconut was in oven before and on counter afterwards", "location of coconut was in oven before and on counter afterwards", "location of towel was in drawer before and on counter afterwards", "location of coconut was in oven before and on counter afterwards", "location of coconut was in oven before and on counter afterwards", "location of coconut was in oven before and on counter afterwards", "location of coconut was in oven before and on counter afterwards"]}
{"id": "Open a Coconut|4", "answers": ["location of coconut was in oven before and in trash afterwards", "location of towel was on counter before and in hand afterwards", "location of coconut was in oven before and on counter afterwards", "location of coconut was in oven before and on counter afterwards", "location of coconut was in oven before and on counter afterwards", "location of towel was on the counter before and in the trash afterwards", "location of coconut was in oven before and on counter afterwards", "location of coconut was in oven before and on counter afterwards", "location of towel was on the counter before and in the trash afterwards", "location of coconut was in oven before and on counter afterwards", "location of coconut was in oven before and on counter afterwards"]}
{"id": "Open a Coconut|5", "answers": ["location of knife was in drawer before and in hand afterwards", "cleanness of knife was clean before and dirty afterwards", "location of knife was in drawer before and in hand afterwards", "cleanness of towel was clean before and dirty afterwards", "location of shell was on pan before and off pan afterwards", "location of meat was on pan before and in bowl afterwards", "location of shell was touching meat before and separated from meat afterwards", "location of knife was in drawer before and in hand afterwards", "cleanness of towel was clean before and dirty afterwards", "location of shell was on pan before and removed afterwards", "location of meat was on shell before and removed afterwards", "location of knife was in drawer before and in hand afterwards", "cleanness of towel was clean before and dirty afterwards", "cleanness of knife was clean before and dirty afterwards", "cleanness of pan was clean before and dirty afterwards"]}
{"id": "Open a Coconut|6", "answers": ["location of fiber was on the coconut before and in the trash afterwards", "location of fiber was on the coconut before and in the trash afterwards", "location of fiber was on the coconut before and in trash afterwards", "location of fiber was on the coconut before and in trash afterwards", "location of fiber was on the coconut before and peeled off the coconut afterwards", "cleanness of knife was clean before and dirty afterwards", "location of fiber was on the coconut before and in the trash afterwards", "location of fiber was on the coconut before and peeled off the coconut afterwards", "location of fiber was on the coconut before and in trash afterwards", "location of fiber was on the coconut before and peeled off the coconut afterwards", "location of fiber was on the coconut before and in trash afterwards", "location of fiber was on the coconut before and in trash afterwards"]}
{"id": "Snap Your Fingers|1", "answers": ["location of thumb was on the table before and on the finger afterwards", "pressure of thumb was relaxed before and pressed afterwards", "pressure of middle finger was relaxed before and pressed afterwards", "location of thumb was on the table before and on the finger afterwards", "pressure of finger was relaxed before and pressed afterwards", "pressure of thumb was relaxed before and pressed afterwards", "pressure of finger was relaxed before and pressed afterwards"]}
{"id": "Snap Your Fingers|2", "answers": ["shape of fingers was straight before and bent afterwards", "location of fingers was in air before and on table afterwards", "shape of fingers was straight before and bent afterwards", "location of pinky was in air before and on table afterwards", "shape of fingers was straight before and bent afterwards", "shape of fingers was straight before and bent afterwards", "location of fingers was in air before and on table afterwards", "shape of fingers was straight before and bent afterwards"]}
{"id": "Snap Your Fingers|3", "answers": ["pressure of thumb was loose before and tight afterwards", "pressure of middle finger was loose before and tight afterwards", "pressure of thumb was loose before and tight afterwards", "pressure of fingers was loose before and pressed afterwards", "pressure of thumb was loose before and pressed afterwards", "pressure of fingers was loose before and pressed afterwards"]}
{"id": "Snap Your Fingers|4", "answers": ["pressure of thumb was relaxed before and pressed afterwards", "pressure of fingers was relaxed before and pressed afterwards", "pressure of fingers was relaxed before and pressed afterwards", "state of you was hearing before and listening afterwards", "pressure of thumb was relaxed before and pressed afterwards", "pressure of fingers was relaxed before and pressed afterwards"]}
{"id": "Snap Your Fingers|5", "answers": ["state of practice was in progress before and complete afterwards", "state of practice was in progress before and complete afterwards", "state of motion was unnatural before and natural afterwards", "state of practice was in progress before and complete afterwards"]}
{"id": "Grow Grass|1", "answers": ["state of seed was considered before and selected afterwards", "location of grass seed was in store before and in your hand afterwards", "ownership of grass seed was owned by store before and bought by you afterwards", "location of grass seed was at store before and in hand afterwards"]}
{"id": "Grow Grass|2", "answers": ["temperature of temperatures was cold before and moderate afterwards", "state of seeds was whole before and germinated afterwards", "state of seeds was dormant before and active afterwards", "state of seeds was dormant before and germinated afterwards", "state of seeds was dormant before and growing afterwards"]}
{"id": "Grow Grass|3", "answers": ["state of soil was unmeasured before and measured afterwards", "location of pH meter was in the drawer before and on the table afterwards", "location of soil was in bag before and in hand afterwards", "state of soil was acidic before and alkaline afterwards", "location of soil was in bag before and in soil afterwards", "state of soil was unmeasured before and measured afterwards", "location of soil was in bag before and in soil afterwards", "state of soil was unmeasured before and measured afterwards"]}
{"id": "Grow Grass|4", "answers": ["state of soil was undamaged before and amended afterwards", "state of soil was acidic before and alkaline afterwards", "state of soil was undamaged before and amended afterwards", "state of soil was undamaged before and amended afterwards", "location of lime was in bag before and in soil afterwards", "state of soil was undamaged before and amended afterwards", "location of lime was in bag before and in soil afterwards"]}
{"id": "Grow Grass|5", "answers": ["state of soil was compacted before and loose afterwards", "state of soil was compacted before and loosened afterwards", "state of soil was compacted before and loose afterwards", "location of compacted soil was in the ground before and out of the ground afterwards", "state of soil was compacted before and loose afterwards", "location of compacted soil was in the ground before and out of the ground afterwards"]}
{"id": "Grow Grass|6", "answers": ["state of soil was whole before and graded afterwards", "state of soil was whole before and graded afterwards", "location of soil was in bag before and on ground afterwards", "state of soil was compacted before and looser afterwards", "state of soil was compacted before and loose afterwards", "location of soil was in bag before and on ground afterwards"]}
{"id": "Grow Grass|7", "answers": ["state of seed was whole before and spread afterwards", "location of seed was in bag before and on soil afterwards", "location of grass seed was in hand before and on soil afterwards", "location of seed was in hand before and on ground afterwards", "location of grass seed was in hand before and on soil afterwards", "location of grass seed was in hand before and on ground afterwards", "location of seed was in hand before and on soil afterwards", "location of grass seed was in hand before and on soil afterwards", "location of seed was in hand before and on soil afterwards"]}
{"id": "Grow Grass|8", "answers": ["state of soil was nutrient poor before and nutrient rich afterwards", "location of fertilizer was in bag before and on soil afterwards", "location of fertilizer was in bag before and on soil afterwards", "location of fertilizer was in bag before and on soil afterwards", "location of fertilizer was in bag before and on soil afterwards", "location of fertilizer was in bag before and on soil afterwards", "location of fertilizer was in bag before and on soil afterwards", "location of fertilizer was in bag before and on soil afterwards", "location of fertilizer was in bag before and on soil afterwards", "location of fertilizer was in bag before and on soil afterwards", "location of fertilizer was in bag before and on soil afterwards", "location of fertilizer was in bag before and on soil afterwards", "location of fertilizer was in bag before and on soil afterwards", "location of fertilizer was in bag before and on soil afterwards"]}
{"id": "Grow Grass|9", "answers": ["state of seed was uncovered before and covered afterwards", "location of organic material was in bag before and on grass seed afterwards", "state of seed was uncovered before and covered afterwards", "location of fertilizer was in bag before and on grass seed afterwards", "state of seed was uncovered before and covered afterwards", "state of grass seed was uncovered before and covered afterwards", "location of fertilizer was in bag before and on grass seed afterwards", "state of seed was uncovered before and covered afterwards", "state of seed was uncovered before and covered afterwards", "location of fertilizer was in bag before and on grass seed afterwards"]}
{"id": "Grow Grass|10", "answers": ["state of the lawn was unprotected before and protected afterwards", "state of the lawn was unprotected before and protected afterwards", "location of the protective material was off the lawn before and on the lawn afterwards", "state of the lawn was vulnerable before and protected afterwards"]}
{"id": "Grow Grass|11", "answers": ["state of lawn was vulnerable before and protected afterwards", "state of grass was unmeasured before and measured afterwards", "state of grass was vulnerable before and protected afterwards", "state of grass was unmeasured before and measured afterwards", "state of grass was unmeasured before and measured afterwards"]}
{"id": "Germinate Tree Seeds|1", "answers": ["location of stones was in a bag before and in a pot afterwards", "location of compost was in bag before and in pot afterwards", "location of stones was in bag before and in pot afterwards", "location of compost was in bag before and in pot afterwards", "location of stones was in bag before and in pot afterwards", "location of stones was in bag before and in pot afterwards", "location of compost was in bag before and in pot afterwards", "location of stones was in bag before and in pot afterwards", "location of stones was in bag before and in pot afterwards", "location of stones and compost was in bag before and in pot afterwards", "location of stones was outside of pot before and inside pot afterwards", "location of stones was in bag before and in pot afterwards", "location of stones was in bag before and in pot afterwards"]}
{"id": "Germinate Tree Seeds|2", "answers": ["location of seeds was in packet before and in pot afterwards", "location of seeds was in packet before and in pot afterwards", "location of seeds was in packet before and in pot afterwards", "location of seeds was in packet before and in pot afterwards", "location of seeds was in packet before and in pot afterwards", "location of seeds was in packet before and in pot afterwards", "location of seeds was in packet before and in pot afterwards", "location of seeds was in packet before and in pot afterwards"]}
{"id": "Germinate Tree Seeds|3", "answers": ["location of pot was in the kitchen before and in the shade afterwards", "location of pot was in the kitchen before and in the shade afterwards", "location of pot was in the kitchen before and in the shade afterwards", "location of pot was in kitchen before and in shady spot afterwards", "location of pot was in kitchen before and in shady spot afterwards"]}
{"id": "Germinate Tree Seeds|4", "answers": ["state of seeds was vulnerable before and protected afterwards", "location of pot was in the house before and outside afterwards", "state of seeds was vulnerable before and protected afterwards", "location of pot was in the house before and outside afterwards", "state of seeds was vulnerable before and protected afterwards", "state of seeds was unprotected before and protected afterwards", "location of pot was in the house before and outside afterwards"]}
{"id": "Germinate Tree Seeds|5", "answers": ["moisture of soil was dry before and damp afterwards", "wetness of soil was dry before and damp afterwards", "wetness of soil was dry before and damp afterwards", "location of water was in hose before and in soil afterwards", "location of water was in hose before and in soil afterwards", "wetness of soil was dry before and damp afterwards", "wetness of soil was dry before and wet afterwards", "wetness of soil was dry before and damp afterwards", "wetness of soil was dry before and damp afterwards", "location of water was in hose before and in soil afterwards"]}
{"id": "Germinate Tree Seeds|6", "answers": ["state of seeds was unchecked before and checked afterwards", "size of seeds was small before and large afterwards", "state of seeds was ungrown before and grown afterwards", "state of seeds was dormant before and germinated afterwards", "state of seeds was dormant before and growing afterwards"]}
{"id": "Tie River Tubes Together|1", "answers": ["location of money was in wallet before and in shop afterwards", "ownership of rope was at store before and purchased afterwards", "location of rope was at store before and at home afterwards", "ownership of rope was at store before and purchased afterwards", "location of rope was at store before and at home afterwards", "location of rope was at store before and at home afterwards", "location of rope was at store before and at home afterwards", "ownership of rope was at store before and purchased afterwards", "location of rope was at store before and at home afterwards", "location of money was in wallet before and in shop afterwards", "ownership of rope was at store before and purchased afterwards"]}
{"id": "Tie River Tubes Together|2", "answers": ["location of scissors was in the drawer before and on the table afterwards", "state of rope was whole before and cut afterwards", "state of rope was uncut before and cut afterwards", "length of rope was long before and short afterwards", "length of rope was long before and short afterwards", "state of rope was uncut before and cut afterwards", "length of rope was long before and short afterwards", "length of tube was long before and short afterwards", "length of rope was long before and short afterwards", "length of tubes was long before and short afterwards"]}
{"id": "Tie River Tubes Together|3", "answers": ["location of rope was outside tube before and inside tube afterwards", "location of rope was on the table before and through the tube afterwards", "state of tube was bare before and tied afterwards", "location of rope was on the table before and through the tube afterwards", "state of tube was empty before and full afterwards", "location of rope was on the table before and through the tube afterwards", "state of tube was empty before and full afterwards", "location of rope was on the table before and through the tube afterwards", "state of rope was loose before and tied afterwards"]}
{"id": "Tie River Tubes Together|4", "answers": ["location of underwater rope was outside of tubes before and inside tubes afterwards", "location of underwater rope was on the ground before and in the second tube afterwards", "location of underwater rope was on the ground before and through the second tube afterwards", "location of underwater rope was on the ground before and through the second tube afterwards", "state of second tube was empty before and full afterwards", "location of underwater rope was on the ground before and through the second tube afterwards"]}
{"id": "Tie River Tubes Together|5", "answers": ["state of knot was untied before and tied afterwards", "tightness of rope was loose before and tied tight afterwards", "state of knot was loose before and tied afterwards", "state of knot was untied before and tied afterwards", "state of knot was loose before and tied afterwards"]}
{"id": "Tie River Tubes Together|6", "answers": ["state of tube was unattached before and attached afterwards", "location of tube was on floor before and on table afterwards", "location of tube was on floor before and attached to other tube afterwards", "state of tube was unattached before and attached afterwards", "location of tube was on floor before and attached to other tube afterwards"]}
{"id": "Snorkel in water|1", "answers": ["state of mask was unselected before and selected afterwards", "state of snorkel was unselected before and selected afterwards", "location of mask was in the package before and on the person afterwards", "location of mask was in the store before and at home afterwards", "availability of mask was absent before and present afterwards", "availability of snorkel was absent before and present afterwards", "availability of mask was unselected before and selected afterwards", "availability of mask was unselected before and selected afterwards", "availability of snorkel was unselected before and selected afterwards", "availability of mask was unselected before and selected afterwards"]}
{"id": "Snorkel in water|2", "answers": ["state of mask was off before and on afterwards", "location of mask was off body before and on body afterwards", "state of mask was off before and on afterwards", "location of mask was in box before and on face afterwards", "state of mask was off before and on afterwards", "location of mask was in box before and on face afterwards", "state of mask was off before and on afterwards", "location of mask was in box before and on face afterwards", "state of mask was off before and on afterwards", "location of mask was in box before and on face afterwards", "state of mask was off before and on afterwards", "location of mask was in box before and on face afterwards"]}
{"id": "Snorkel in water|3", "answers": ["location of person was on the surface before and in the water afterwards", "location of person was on the surface before and in the water afterwards", "location of person was on the surface before and in the water afterwards", "location of person was on the surface before and in the water afterwards", "location of person was on the surface before and in the water afterwards", "location of person was on the surface before and in the water afterwards", "orientation of person was upright before and laying flat afterwards", "location of person was on the surface before and in the water afterwards", "location of person was on the surface before and in the water afterwards", "location of person was on the surface before and in the water afterwards"]}
{"id": "Snorkel in water|4", "answers": ["location of mouthpiece was in mouth before and in hand afterwards", "location of mouthpiece was in water before and in hand afterwards", "location of mouthpiece was in mouth before and in hand afterwards", "location of mouthpiece was in hand before and in water afterwards", "location of mouthpiece was in hand before and in water afterwards", "location of mouthpiece was in hand before and in water afterwards", "location of mouthpiece was in water before and in mouth afterwards", "location of mouthpiece was in hand before and in water afterwards", "location of mouthpiece was in the air before and in the water afterwards", "location of mouthpiece was in hand before and in water afterwards", "location of mouthpiece was in the air before and in the water afterwards", "location of mouthpiece was in the air before and in the water afterwards", "location of mouthpiece was in the air before and in the water afterwards"]}
{"id": "Snorkel in water|5", "answers": ["pressure of lungs was relaxed before and constricted afterwards", "pressure of air was in lungs before and being exhaled afterwards", "state of lungs was empty before and full afterwards", "state of mouth was open before and closed afterwards", "state of mouth was open before and closed afterwards", "location of air was in lungs before and in water afterwards", "location of air was in lungs before and in water afterwards", "state of mouth was open before and closed afterwards", "location of air was in lungs before and in water afterwards", "location of air was in lungs before and in water afterwards", "location of air was in lungs before and in water afterwards"]}
{"id": "Snorkel in water|6", "answers": ["location of vest was in the drawer before and on the body afterwards", "location of vest was in the drawer before and on the body afterwards", "location of buoyancy vest was in the drawer before and on the body afterwards", "location of vest was in the drawer before and on the body afterwards", "location of buoyancy vest was in the drawer before and on the body afterwards", "location of buoyancy vest was in the drawer before and on the body afterwards", "location of buoyancy vest was in the drawer before and on the body afterwards", "location of vest was in the drawer before and on the body afterwards", "location of buoyancy vest was in the drawer before and on the body afterwards", "location of vest was in the drawer before and on the body afterwards", "location of vest was in the drawer before and on the body afterwards", "location of buoyancy vest was in the drawer before and on the body afterwards", "location of vest was in the drawer before and on the body afterwards"]}
{"id": "Cook Diced Beef|1", "answers": ["location of fat was on meat before and off meat afterwards", "location of fat was on meat before and off meat afterwards", "state of meat was covered in fat before and without fat afterwards", "location of fat was on meat before and removed afterwards", "state of meat was covered in fat before and without fat afterwards", "location of fat was on meat before and off meat afterwards", "location of fat was on meat before and off meat afterwards", "location of fat was on meat before and in pan afterwards"]}
{"id": "Cook Diced Beef|2", "answers": ["size of meat was whole before and in pieces afterwards", "shape of meat was whole before and in pieces afterwards", "size of meat was whole before and in pieces afterwards", "size of meat was whole before and in pieces afterwards", "shape of meat was whole before and in pieces afterwards", "size of meat was whole before and in pieces afterwards", "composition of meat was whole before and cut up afterwards", "composition of meat was whole before and diced afterwards", "composition of meat was whole before and diced afterwards", "shape of meat was whole before and cut into cubes afterwards"]}
{"id": "Cook Diced Beef|3", "answers": ["location of flour was in bag before and in bowl afterwards", "location of meat was on counter before and in bowl afterwards", "location of salt was in bag before and in bowl afterwards", "location of pepper was in bottle before and in bowl afterwards", "composition of beef was separate before and mixed afterwards", "location of flour was in bag before and in bowl afterwards", "location of salt was in bag before and in bowl afterwards", "location of pepper was in bottle before and in bowl afterwards", "location of flour was in bag before and in bowl afterwards", "location of pepper was in bottle before and in bowl afterwards", "location of bowl was in the cupboard before and on the counter top afterwards", "location of beef was on counter before and in bowl afterwards", "location of bowl was in the cupboard before and on the table afterwards", "location of meat was on counter before and in bowl afterwards", "location of salt was in bag before and in bowl afterwards", "location of pepper was in bottle before and in bowl afterwards", "location of flour was in bag before and in bowl afterwards", "location of meat was on counter before and in bowl afterwards"]}
{"id": "Cook Diced Beef|4", "answers": ["temperature of skillet was cool before and hot afterwards", "temperature of oil was cool before and hot afterwards", "temperature of skillet was cool before and hot afterwards", "temperature of oil was cool before and hot afterwards", "temperature of skillet was cool before and hot afterwards", "temperature of oil was cool before and hot afterwards", "temperature of skillet was cool before and hot afterwards", "temperature of skillet was cool before and hot afterwards", "temperature of oil was cool before and hot afterwards", "temperature of skillet was cool before and hot afterwards", "temperature of oil was cold before and hot afterwards", "temperature of skillet was cool before and hot afterwards", "temperature of oil was cold before and hot afterwards", "temperature of skillet was cool before and hot afterwards", "temperature of oil was cold before and hot afterwards", "temperature of oil was cold before and hot afterwards", "temperature of oil was cold before and hot afterwards", "temperature of skillet was cool before and hot afterwards", "temperature of oil was cold before and hot afterwards", "temperature of oil was cold before and hot afterwards", "temperature of skillet was cool before and hot afterwards"]}
{"id": "Cook Diced Beef|5", "answers": ["state of meat was raw before and cooked afterwards", "temperature of meat was cold before and hot afterwards", "temperature of meat was cold before and hot afterwards", "temperature of meat was cold before and hot afterwards", "temperature of meat was cold before and hot afterwards", "temperature of meat was cold before and hot afterwards", "temperature of meat was cold before and hot afterwards", "temperature of meat was cold before and hot afterwards", "temperature of meat was cold before and hot afterwards", "temperature of meat was cold before and hot afterwards", "temperature of meat was cold before and hot afterwards", "temperature of meat was cold before and hot afterwards", "temperature of meat was cold before and hot afterwards"]}
{"id": "Cook Diced Beef|6", "answers": ["state of mixture was unmixed before and mixed afterwards", "location of spice was in a container before and in the meat afterwards", "location of spice was in a container before and in the meat afterwards", "location of mixture was in bowl before and on meat afterwards", "location of mixture was in bowl before and on meat afterwards", "location of mixture was in bowl before and on meat afterwards", "location of mixture was in bowl before and on meat afterwards", "location of mixture was in bowl before and on meat afterwards", "location of mixture was in bowl before and on meat afterwards", "location of seasoning was in a container before and in the meat afterwards", "state of meat was raw before and cooked afterwards", "temperature of skillet was cool before and hot afterwards", "temperature of skillet was cool before and hot afterwards"]}
{"id": "Cook Diced Beef|7", "answers": ["temperature of meat was cold before and hot afterwards", "temperature of skillet was cold before and hot afterwards", "temperature of meat was cold before and hot afterwards", "temperature of bowl was cool before and hot afterwards", "temperature of bowl was cool before and hot afterwards", "temperature of meat was cold before and hot afterwards", "temperature of bowl was cool before and hot afterwards", "temperature of skillet was cold before and hot afterwards", "temperature of bowl was cool before and hot afterwards", "temperature of meat was cold before and hot afterwards", "temperature of bowl was cool before and hot afterwards", "temperature of meat was cold before and hot afterwards", "temperature of bowl was cool before and hot afterwards", "temperature of bowl was cold before and hot afterwards", "temperature of bowl was cool before and hot afterwards", "temperature of bowl was cold before and hot afterwards", "temperature of bowl was cool before and hot afterwards"]}
{"id": "Cook Diced Beef|8", "answers": ["location of beef was in bowl before and on plate afterwards", "location of beef was in bowl before and on plate afterwards", "location of sides was in the pantry before and on the table afterwards", "location of beef was in bowl before and on plate afterwards", "location of sides was in the pantry before and on the table afterwards", "location of beef was in bowl before and on plate afterwards", "location of sides was in the pantry before and on the table afterwards", "location of beef was in bowl before and on plate afterwards", "location of sides was in the pantry before and on the table afterwards", "location of beef was in bowl before and on plate afterwards", "location of sides was in the pantry before and on the table afterwards"]}
{"id": "Oven Cook Sausages|1", "answers": ["location of sausages was in fridge before and on counter afterwards", "location of sausages was in fridge before and on counter afterwards", "state of sausages was in fridge before and out of fridge afterwards", "location of sausages was in fridge before and on counter afterwards", "temperature of sausages was cold before and hot afterwards", "location of sausages was in fridge before and on counter afterwards", "temperature of sausages was cold before and hot afterwards", "location of sausages was in fridge before and on counter afterwards", "temperature of sausages was cold before and hot afterwards", "temperature of sausages was cold before and hot afterwards", "location of sausages was in fridge before and on counter afterwards"]}
{"id": "Oven Cook Sausages|2", "answers": ["temperature of oven was cold before and hot afterwards", "temperature of oven was cold before and hot afterwards", "power of oven was off before and on afterwards", "temperature of oven was cold before and hot afterwards", "temperature of oven was cold before and hot afterwards", "temperature of oven was cold before and hot afterwards", "temperature of oven was cold before and hot afterwards", "temperature of oven was cold before and hot afterwards", "temperature of oven was cold before and hot afterwards", "temperature of oven was cold before and hot afterwards", "temperature of oven was cold before and hot afterwards", "temperature of oven was cold before and 350°F afterwards", "temperature of oven was cold before and 350°F afterwards", "temperature of oven was cold before and 350°F afterwards", "temperature of oven was cold before and 350°F afterwards", "temperature of oven was cold before and 350°F afterwards", "temperature of oven was cold before and 350°F afterwards", "temperature of oven was cold before and 350°F afterwards"]}
{"id": "Oven Cook Sausages|3", "answers": ["location of knife was in the drawer before and on the counter afterwards", "state of sausages was whole before and cut afterwards", "state of link was whole before and cut afterwards", "state of sausage links was whole before and cut afterwards", "state of sausages was whole before and cut afterwards", "state of link was whole before and cut afterwards", "state of sausage links was whole before and cut afterwards", "state of link was whole before and cut afterwards"]}
{"id": "Oven Cook Sausages|4", "answers": ["location of baking pan was in cabinet before and on counter afterwards", "state of baking pan was bare before and lined with foil afterwards", "location of foil was in package before and on pan afterwards", "state of pan was bare before and lined afterwards", "location of baking pan was in cabinet before and on counter afterwards", "state of pan was bare before and lined afterwards", "location of foil was in package before and on pan afterwards", "weight of baking pan was lighter before and heavier afterwards", "state of baking pan was bare before and lined afterwards", "state of pan was bare before and lined afterwards"]}
{"id": "Oven Cook Sausages|5", "answers": ["location of sausages was on counter before and on wire rack afterwards", "location of wire rack was in cupboard before and on pan afterwards", "location of sausages was on counter before and on wire rack afterwards", "location of wire rack was in cupboard before and on pan afterwards", "state of pan was unlined before and lined afterwards", "location of sausages was on counter before and on wire rack afterwards", "weight of pan was lighter before and heavier afterwards", "weight of baking pan was lighter before and heavier afterwards", "location of sausages was on counter before and on wire rack afterwards", "cleanness of wire rack was clean before and dirty afterwards", "location of sausages was on counter before and on wire rack afterwards", "weight of baking pan was lighter before and heavier afterwards", "weight of pan was lighter before and heavier afterwards"]}
{"id": "Oven Cook Sausages|6", "answers": ["location of sausages was on counter before and on wire rack afterwards", "location of sausages was on counter before and on wire rack afterwards", "location of sausages was on counter before and on wire rack afterwards", "weight of pan was lighter before and heavier afterwards", "location of sausages was on counter before and on wire rack afterwards", "weight of pan was lighter before and heavier afterwards", "location of sausages was on counter before and on wire rack afterwards", "weight of pan was lighter before and heavier afterwards", "volume of pan was empty before and full afterwards", "location of sausages was on counter before and on wire rack afterwards", "temperature of pan was hot before and warm afterwards", "temperature of sausages was hot before and warm afterwards", "temperature of pan was hot before and warm afterwards", "temperature of sausages was hot before and warm afterwards", "temperature of pan was cool before and hot afterwards"]}
{"id": "Oven Cook Sausages|7", "answers": ["temperature of sausages was cold before and hot afterwards", "temperature of pan was cool before and hot afterwards", "temperature of sausages was cold before and hot afterwards", "temperature of oven was cool before and hot afterwards", "temperature of sausages was cold before and hot afterwards", "temperature of pan was cool before and hot afterwards", "temperature of sausage was cold before and hot afterwards", "temperature of oven was cold before and hot afterwards", "temperature of sausages was cold before and hot afterwards", "temperature of oven was cold before and hot afterwards", "temperature of sausages was cold before and hot afterwards", "temperature of sausage was cold before and hot afterwards", "temperature of pan was cool before and hot afterwards", "temperature of sausage was cold before and hot afterwards", "temperature of pan was cool before and hot afterwards", "temperature of sausage was cold before and hot afterwards", "temperature of oven was cool before and hot afterwards", "temperature of sausages was cold before and hot afterwards", "temperature of pan was cool before and hot afterwards"]}
{"id": "Oven Cook Sausages|8", "answers": ["temperature of sausages was cooler before and hotter afterwards", "temperature of sausages was cold before and hot afterwards", "state of sausages was uncooked before and cooked afterwards", "temperature of sausages was cold before and hot afterwards", "temperature of oven was cold before and hot afterwards", "temperature of sausages was cold before and hot afterwards", "temperature of sausages was cold before and hot afterwards", "temperature of sausages was cold before and hot afterwards", "temperature of sausages was cold before and hot afterwards", "temperature of pan was cool before and hot afterwards", "temperature of sausages was cold before and hot afterwards", "temperature of sausages was cold before and hot afterwards", "temperature of pan was cool before and hot afterwards", "temperature of sausages was cold before and hot afterwards", "temperature of sausages was cold before and hot afterwards", "temperature of oven was cool before and hot afterwards"]}
{"id": "Oven Cook Sausages|9", "answers": ["size of sausage was small before and large afterwards", "temperature of sausage was cold before and hot afterwards", "state of larger sausages was uncooked before and cooked afterwards", "temperature of pan was hot before and cooler afterwards", "temperature of sausage was cold before and hot afterwards", "temperature of oven was hot before and cooler afterwards", "temperature of pan was hot before and cooler afterwards", "temperature of sausage was cold before and hot afterwards", "temperature of sausage was cold before and hot afterwards", "temperature of pan was hot before and hotter afterwards", "temperature of sausage was cold before and hot afterwards", "state of larger sausages was uncooked before and cooked afterwards", "state of larger sausages was uncooked before and cooked afterwards", "temperature of sausage was cold before and hot afterwards"]}
{"id": "Oven Cook Sausages|10", "answers": ["cleanness of knife was clean before and dirty afterwards", "state of sausage was whole before and cut afterwards", "state of sausage was uncut before and cut afterwards", "temperature of sausage was cold before and hot afterwards", "temperature of sausages was cold before and hot afterwards", "temperature of sausage was cold before and hot afterwards", "state of sausage was whole before and cut afterwards"]}
{"id": "Oven Cook Sausages|11", "answers": ["color of sausage was pink before and red afterwards", "temperature of sausage was hot before and cooler afterwards", "color of sausage was pink before and red afterwards", "temperature of sausage was hot before and cooler afterwards", "temperature of sausage was hot before and cooler afterwards", "color of sausage was pink before and red afterwards", "temperature of sausage was hot before and cooler afterwards", "color of sausage was pink before and red afterwards", "temperature of sausage was hot before and cooler afterwards", "color of sausage was pink before and red afterwards", "temperature of sausage was hot before and cooler afterwards", "color of sausage was pink before and red afterwards", "temperature of sausage was hot before and cooler afterwards", "color of sausage was pink before and red afterwards", "temperature of sausage was hot before and hotter afterwards", "color of sausage was pink before and red afterwards", "temperature of sausage was hot before and hotter afterwards"]}
{"id": "Oven Cook Sausages|12", "answers": ["texture of sausage was hard before and soft afterwards", "temperature of sausage was hot before and cooler afterwards", "state of sausages was uncooked before and cooked afterwards", "temperature of sausage was hot before and cooler afterwards", "state of sausage was uncooked before and cooked afterwards", "temperature of sausage was hot before and cooler afterwards", "temperature of pan was hot before and cooler afterwards", "temperature of sausage was hot before and cooler afterwards", "location of sausage was on pan before and in test pan afterwards", "state of sausage was uncooked before and cooked afterwards", "temperature of pan was hot before and cooler afterwards", "temperature of sausage was hot before and cooler afterwards", "location of sausage was on pan before and in test pan afterwards", "state of sausage was uncooked before and cooked afterwards", "temperature of pan was hot before and cooler afterwards"]}
{"id": "Oven Cook Sausages|13", "answers": ["state of sausage was uncooked before and cooked afterwards", "temperature of sausage was cold before and hot afterwards", "temperature of meat was cold before and hot afterwards", "temperature of sausage was cold before and hot afterwards", "temperature of pan was cool before and hot afterwards", "temperature of sausage was cold before and hot afterwards", "temperature of meat was cold before and hot afterwards", "temperature of sausage was cold before and hot afterwards", "temperature of pan was cool before and hot afterwards", "temperature of sausage was cold before and hot afterwards", "temperature of sausage was cold before and hot afterwards", "temperature of pan was cool before and hot afterwards", "temperature of sausage was cold before and hot afterwards", "temperature of meat thermometer was cold before and hot afterwards", "temperature of sausage was cold before and hot afterwards", "temperature of pan was cool before and hot afterwards"]}
{"id": "Take a shower|1", "answers": ["state of the clothes was on before and off afterwards", "location of clothes was on before and off afterwards", "location of clothes was on before and off afterwards", "state of the clothes was on before and taken off afterwards", "location of clothes was on before and off afterwards", "location of clothes was on before and off afterwards", "state of body was naked before and clothed afterwards", "state of clothes was on before and off afterwards", "location of clothes was on before and off afterwards"]}
{"id": "Take a shower|2", "answers": ["state of shower head was closed before and open afterwards", "location of nozzle was in the cabinet before and on the floor afterwards", "state of shower head was closed before and open afterwards", "location of nozzle was in the cabinet before and on the floor afterwards", "state of shower head was off before and on afterwards", "location of shower nozzle was in the cabinet before and on the floor afterwards", "state of shower was off before and on afterwards", "location of clothes was on before and off afterwards", "state of shower was off before and on afterwards", "state of shower head was off before and on afterwards", "location of shower nozzle was in the cabinet before and on the floor afterwards"]}
{"id": "Take a shower|3", "answers": ["state of shower was closed before and open afterwards", "state of shower was off before and on afterwards", "location of shower head was in the closet before and in the hand afterwards", "state of shower was off before and on afterwards", "location of shower head was in the cabinet before and on the wall afterwards", "state of shower was off before and on afterwards", "location of shower head was in the cabinet before and on the wall afterwards", "state of shower was off before and on afterwards", "location of shower nozzle was in the drawer before and on the wall afterwards"]}
{"id": "Take a shower|4", "answers": ["location of shampoo was in bottle before and in water afterwards", "location of shampoo was in the bottle before and in the shower afterwards", "location of water was in faucet before and in drain afterwards", "location of shampoo was in bottle before and in drain afterwards", "location of water was in faucet before and in drain afterwards", "location of shampoo was in bottle before and in drain afterwards", "location of water was in faucet before and in drain afterwards", "location of shampoo was in bottle before and in drain afterwards", "location of water was in faucet before and in drain afterwards", "location of wansher was off before and on afterwards", "location of shampoo was in bottle before and in drain afterwards", "location of water was in faucet before and in drain afterwards"]}
{"id": "Take a shower|5", "answers": ["location of water was in faucet before and in drain afterwards", "wetness of hair was dry before and wet afterwards", "location of shampoo was in bottle before and in drain afterwards", "location of water was in faucet before and in drain afterwards", "location of soap was in bottle before and in drain afterwards", "location of water was in faucet before and in drain afterwards", "location of shampoo was in bottle before and in drain afterwards", "location of water was in faucet before and in drain afterwards", "location of soap was in bottle before and in drain afterwards", "location of water was in faucet before and in drain afterwards", "location of water was in faucet before and in drain afterwards", "location of rinse was in bottle before and in drain afterwards", "location of water was in faucet before and in drain afterwards"]}
{"id": "Take a shower|6", "answers": ["state of shower was open before and closed afterwards", "location of water was in faucet before and in drain afterwards", "location of nozzle was in hand before and in shower afterwards", "state of shower was open before and closed afterwards", "location of water was in faucet before and in drain afterwards", "state of shower was open before and closed afterwards", "location of water was in faucet before and in drain afterwards", "state of shower was open before and closed afterwards", "location of water was in faucet before and in drain afterwards"]}
{"id": "Take a shower|7", "answers": ["location of water was in faucet before and in drain afterwards", "wetness of body was wet before and dry afterwards", "location of water was in shower before and in drain afterwards", "wetness of hair was wet before and dry afterwards", "wetness of body was wet before and dry afterwards", "location of water was in faucet before and in drain afterwards", "location of water was in shower before and in drain afterwards", "location of water was in shower before and in drain afterwards", "wetness of body was wet before and dry afterwards", "wetness of hair was wet before and dry afterwards", "location of water was in shower nozzle before and in drain afterwards", "wetness of body was wet before and dry afterwards", "wetness of hair was wet before and dry afterwards", "location of water was in shower before and in drain afterwards"]}
{"id": "Take a photo|1", "answers": ["state of camera was closed before and open afterwards", "state of camera was closed before and open afterwards", "state of camera was closed before and open afterwards", "state of camera was closed before and open afterwards", "state of camera was closed before and open afterwards"]}
{"id": "Take a photo|2", "answers": ["state of camera was unset up before and set up afterwards", "state of camera was unset up before and set up afterwards", "state of camera parameter was unset up before and set up afterwards", "state of camera parameter was unset before and set afterwards", "state of camera was unset up before and set up afterwards"]}
{"id": "Take a photo|3", "answers": ["state of button was unclicked before and clicked afterwards", "state of button was unclicked before and clicked afterwards", "state of camera was off before and on afterwards", "state of button was unclicked before and clicked afterwards", "state of camera was off before and on afterwards", "state of button was unclicked before and clicked afterwards"]}
{"id": "Take a photo|4", "answers": ["state of phone was off before and on afterwards", "state of phone was empty before and loaded afterwards", "state of camera was off before and on afterwards", "state of phone was empty before and loaded afterwards", "state of phone was empty before and loaded afterwards", "state of photo was unsent before and sent afterwards", "state of phone was empty before and loaded afterwards", "state of photo was unsent before and sent afterwards", "state of phone was empty before and loaded afterwards"]}
{"id": "Buy a pen|1", "answers": ["location of you was elsewhere before and at a store afterwards", "location of you was elsewhere before and at store afterwards", "location of you was at home before and at store afterwards", "location of you was at home before and at store afterwards"]}
{"id": "Buy a pen|2", "answers": ["state of pen was considered before and found afterwards", "location of pen was on shelf before and in hand afterwards", "location of pen was in store before and in hand afterwards", "location of pen was on shelf before and in hand afterwards", "location of pen was in store before and in hand afterwards"]}
{"id": "Buy a pen|3", "answers": ["location of pen was on shelf before and in hand afterwards", "ownership of pen was owned by store before and owned by you afterwards", "location of pen was in the store before and in your hand afterwards", "ownership of pen was owned by store before and bought by you afterwards", "location of pen was in the store before and in your hand afterwards", "location of pen was in the store before and in your hand afterwards", "ownership of pen was owned by store before and bought by you afterwards"]}
{"id": "Buy a pen|4", "answers": ["state of pen was unpaid before and paid afterwards", "state of pen was considered before and purchased afterwards", "state of pen was for sale before and purchased afterwards", "state of pen was for sale before and purchased afterwards", "state of pen was for sale before and purchased afterwards", "state of pen was for sale before and purchased afterwards", "state of pen was for sale before and purchased afterwards", "state of pen was for sale before and purchased afterwards", "location of pen was on shelf before and in hand afterwards"]}
{"id": "Buy a pen|5", "answers": ["location of pen was in hand before and in bag afterwards", "location of pen was at the store before and in your bag afterwards", "location of pen was at the store before and in your bag afterwards", "location of pen was at store before and at home afterwards", "location of pen was at store before and at home afterwards", "location of pen was at store before and at home afterwards", "location of pen was at store before and at home afterwards"]}
{"id": "Make pancakes|1", "answers": ["cleanness of bowl was clean before and dirty afterwards", "composition of eggs was whole before and cracked afterwards", "state of eggs was whole before and cracked afterwards", "state of bowl was empty before and full of eggs afterwards", "state of eggs was whole before and cracked afterwards", "composition of eggshell was whole before and cracked afterwards", "state of eggs was whole before and cracked afterwards", "composition of eggshell was whole before and cracked afterwards", "state of eggs was whole before and cracked afterwards", "state of bowl was empty before and full afterwards", "location of eggs was in the fridge before and in the bowl afterwards", "location of eggshell was on the shell before and in the bowl afterwards", "cleanness of bowl was clean before and dirty afterwards", "location of eggshell was on the shell before and in the bowl afterwards", "location of eggshell was on the shell before and in the bowl afterwards", "location of eggshell was on the shell before and in the bowl afterwards", "state of eggs was whole before and cracked afterwards"]}
{"id": "Make pancakes|2", "answers": ["temperature of butter was cool before and hot afterwards", "state of butter was solid before and liquid afterwards", "temperature of butter was cold before and hot afterwards", "temperature of bowl was cool before and hot afterwards", "temperature of butter was cold before and hot afterwards", "temperature of butter was cold before and hot afterwards", "temperature of butter was cold before and hot afterwards", "temperature of butter was cold before and hot afterwards", "temperature of butter was cold before and hot afterwards", "temperature of butter was cold before and hot afterwards", "temperature of butter was cold before and hot afterwards", "temperature of butter was cold before and hot afterwards", "temperature of butter was cold before and hot afterwards", "temperature of butter was cold before and hot afterwards", "temperature of butter was cold before and hot afterwards", "temperature of butter was cold before and hot afterwards", "temperature of butter was cold before and hot afterwards", "temperature of butter was cold before and hot afterwards", "temperature of butter was cold before and hot afterwards", "temperature of butter was cold before and hot afterwards", "temperature of butter was cold before and hot afterwards", "temperature of butter was cold before and hot afterwards", "temperature of butter was cold before and hot afterwards", "temperature of butter was cold before and hot afterwards", "temperature of butter was cold before and hot afterwards", "temperature of butter was cold"]}
{"id": "Make pancakes|3", "answers": ["location of milk was in the fridge before and in the bowl afterwards", "location of butter was in the fridge before and in the bowl afterwards", "location of milk was in the fridge before and in the bowl afterwards", "composition of butter and milk was separate before and mixed afterwards", "location of milk was in the fridge before and in the bowl afterwards", "location of butter was in the fridge before and in the bowl afterwards", "composition of butter and milk was separate before and mixed afterwards", "location of milk was in the fridge before and in the bowl afterwards", "location of butter was in the fridge before and in the bowl afterwards", "location of milk was in the fridge before and in the bowl afterwards", "location of milk was in the fridge before and in the bowl afterwards", "location of butter was in the fridge before and in the bowl afterwards", "location of milk was in the fridge before and in the bowl afterwards", "location of butter was in the fridge before and in the bowl afterwards", "location of milk was in the fridge before and in the bowl afterwards", "location of milk was in fridge before and in bowl afterwards"]}
{"id": "Make pancakes|4", "answers": ["temperature of pan was cool before and hot afterwards", "temperature of pan was cold before and hot afterwards", "temperature of pan was cold before and hot afterwards", "temperature of pan was cold before and hot afterwards", "temperature of pan was cool before and hot afterwards", "temperature of pan was cool before and hot afterwards", "temperature of pan was cool before and hot afterwards", "temperature of pan was cool before and hot afterwards", "temperature of pan was cool before and hot afterwards", "temperature of pan was cool before and hot afterwards", "temperature of pan was cool before and hot afterwards", "temperature of pan was cool before and hot afterwards", "temperature of pan was cold before and hot afterwards", "temperature of pan was cold before and hot afterwards", "temperature of stove was cold before and hot afterwards", "temperature of stove was cold before and hot afterwards", "temperature of stove was cold before and hot afterwards", "temperature of stove was cold before and hot afterwards", "temperature of stove was cold before and hot afterwards", "temperature of pan was cold before and hot afterwards"]}
{"id": "Make pancakes|5", "answers": ["location of batter was in a bowl before and on the griddle afterwards", "location of batter was in a container before and on the pan afterwards", "temperature of pan was cool before and hot afterwards", "temperature of pan was cool before and hot afterwards", "temperature of batter was cool before and hot afterwards", "temperature of pan was cool before and hot afterwards", "temperature of batter was cool before and hot afterwards", "temperature of pan was cool before and hot afterwards", "temperature of batter was cool before and hot afterwards", "temperature of pan was cool before and hot afterwards", "temperature of batter was cold before and hot afterwards", "temperature of pan was cool before and hot afterwards", "temperature of batter was cold before and hot afterwards", "temperature of pan was cool before and hot afterwards", "temperature of batter was cold before and hot afterwards", "temperature of pan was cool before and hot afterwards", "temperature of batter was cold before and hot afterwards", "temperature of pan was cool before and hot afterwards", "temperature of batter was cold before and hot afterwards", "temperature of pan was cool before and hot afterwards"]}
{"id": "Make pancakes|6", "answers": ["color of pancake was white before and golden brown afterwards", "temperature of pan was cool before and hot afterwards", "temperature of pancake was cold before and hot afterwards", "temperature of pan was cool before and hot afterwards", "temperature of pancake was cold before and hot afterwards", "temperature of pancake was cold before and hot afterwards", "temperature of pancake was cold before and hot afterwards", "temperature of pancake was cold before and hot afterwards", "temperature of pancake was cold before and hot afterwards", "temperature of pancake was cold before and hot afterwards", "temperature of pancake was cold before and hot afterwards", "temperature of pancake was cold before and hot afterwards", "temperature of pan was cold before and hot afterwards", "temperature of pancake was cold before and hot afterwards", "temperature of pancake was cold before and hot afterwards", "temperature of pancake was cold before and hot afterwards", "temperature of pan was cold before and hot afterwards", "temperature of pancake was cold before and hot afterwards", "temperature of pancake was cold before and hot afterwards", "temperature of pan was cool before and hot afterwards"]}
{"id": "Make pancakes|7", "answers": ["state of other side of pancake was uncooked before and cooked afterwards", "temperature of pancake was cold before and hot afterwards", "temperature of pancake was cold before and hot afterwards", "temperature of pan was cool before and hot afterwards", "temperature of pancake was cold before and hot afterwards", "temperature of pancake was cold before and hot afterwards", "state of pancake was uncooked before and cooked afterwards", "temperature of pancake was cold before and hot afterwards", "temperature of pancake was cold before and hot afterwards", "temperature of pancake was cold before and hot afterwards", "temperature of pancake was cold before and hot afterwards", "temperature of pancake was cold before and hot afterwards", "temperature of pancake was cold before and hot afterwards", "temperature of pancake was cold before and hot afterwards", "temperature of pancake was cold before and hot afterwards", "temperature of pancake was cold before and hot afterwards", "temperature of pancake was cold before and hot afterwards", "temperature of pan was cool before and hot afterwards"]}
{"id": "Make pancakes|8", "answers": ["location of pancake was in the pan before and on a plate afterwards", "temperature of plate was cool before and hot afterwards", "location of plate was in the cupboard before and on the table afterwards", "cleanness of plate was clean before and dirty afterwards", "location of pancake was in the pan before and on the plate afterwards", "location of plate was in the cupboard before and on the table afterwards", "location of pancake was in the pan before and on the plate afterwards", "location of pancake was in the pan before and on the plate afterwards", "location of pancake was in the pan before and on the plate afterwards", "location of pancake was in the pan before and on the plate afterwards", "location of pancake was in the pan before and on the plate afterwards", "location of pancake was in the pan before and on the plate afterwards", "location of pancake was in the pan before and on the plate afterwards", "location of pancake was in the pan before and on the plate afterwards"]}
{"id": "Make paper airplane|1", "answers": ["state of paper was considered before and selected afterwards", "state of paper was considered before and selected afterwards", "state of paper was considered before and selected afterwards", "state of paper was considered before and purchased afterwards", "state of paper was considered before and purchased afterwards", "state of paper was considered before and purchased afterwards", "state of paper was considered before and purchased afterwards"]}
{"id": "Make paper airplane|2", "answers": ["shape of paper was flat before and creased afterwards", "shape of paper was flat before and creased afterwards", "state of paper was flat before and creased afterwards", "state of paper was flat before and creased afterwards", "state of paper was flat before and creased afterwards", "state of paper was flat before and creased afterwards"]}
{"id": "Make paper airplane|3", "answers": ["location of top corners was on the crease before and on the paper afterwards", "shape of paper was flat before and creased afterwards", "location of top corners was on the crease before and brought toward center afterwards", "state of paper was flat before and creased afterwards", "shape of paper was flat before and creased afterwards"]}
{"id": "Make paper airplane|4", "answers": ["shape of paper was flat before and creased afterwards", "shape of paper was flat before and folded afterwards", "location of bottom point was on the table before and in the hand afterwards", "shape of paper was flat before and creased afterwards", "location of bottom point was on the table before and in the hand afterwards", "shape of paper was flat before and folded afterwards", "location of bottom point was on the table before and in the hand afterwards", "shape of paper was flat before and creased afterwards"]}
{"id": "Make paper airplane|5", "answers": ["shape of paper was flat before and creased afterwards", "shape of paper was flat before and creased afterwards", "shape of paper was flat before and creased afterwards", "shape of paper was flat before and creased afterwards", "shape of paper was flat before and folded afterwards", "shape of paper was flat before and creased afterwards", "shape of paper was flat before and folded afterwards"]}
{"id": "Make paper airplane|6", "answers": ["shape of paper was flat before and creased afterwards", "shape of paper was flat before and folded afterwards", "shape of paper was flat before and creased afterwards", "shape of paper was flat before and folded afterwards", "shape of paper was flat before and creased afterwards"]}
{"id": "Make paper airplane|7", "answers": ["shape of paper was flat before and creased afterwards", "shape of paper was flat before and creased afterwards", "shape of paper was flat before and creased afterwards", "location of crease was on paper before and on paper afterwards", "shape of paper was flat before and creased afterwards", "shape of paper was flat before and creased afterwards"]}
{"id": "Download a movie|1", "answers": ["state of movie site was unselected before and selected afterwards", "state of browser was closed before and open afterwards", "state of movie site was unselected before and selected afterwards", "state of movie site was unselected before and selected afterwards", "state of browser was closed before and open afterwards"]}
{"id": "Download a movie|2", "answers": ["state of search box was unselected before and selected afterwards", "state of movie was unselected before and selected afterwards", "state of movie was unselected before and selected afterwards", "state of movie was unselected before and selected afterwards", "state of movie was unselected before and selected afterwards", "state of movie was unselected before and selected afterwards"]}
{"id": "Download a movie|3", "answers": ["state of movie was unselected before and selected afterwards", "state of download was unstarted before and started afterwards", "state of movie was unselected before and selected afterwards", "state of download was unstarted before and started afterwards", "state of movie was unselected before and selected afterwards"]}
{"id": "Download a movie|4", "answers": ["state of movie quality was unselected before and selected afterwards", "state of format was unselected before and selected afterwards", "state of movie quality was unselected before and selected afterwards", "state of format was unselected before and selected afterwards"]}
{"id": "Download a movie|5", "answers": ["state of download button was unclicked before and clicked afterwards", "state of download was unselected before and selected afterwards", "state of download was unstarted before and started afterwards", "state of download was unselected before and selected afterwards", "state of download was unstarted before and started afterwards", "state of download was unselected before and selected afterwards"]}
{"id": "Endorse the check|1", "answers": ["knowledge of information was unverified before and verified afterwards", "state of information was incorrect before and correct afterwards", "state of the information was incorrect before and verified as correct afterwards"]}
{"id": "Endorse the check|2", "answers": ["knowledge of who must endorse the check was unknown before and known afterwards", "knowledge of who must endorse the check was undetermined before and determined afterwards"]}
{"id": "Endorse the check|3", "answers": ["color of check was white before and gray afterwards", "state of check was blank before and signed afterwards", "state of check was unmarked before and endorsed afterwards", "state of check was unmarked before and endorsed afterwards", "state of check was unmarked before and endorsed afterwards", "state of check was unmarked before and endorsed afterwards"]}
{"id": "Endorse the check|4", "answers": ["state of signature was absent before and present afterwards", "state of line was blank before and signed afterwards", "state of line was blank before and signed afterwards", "state of line was blank before and signed afterwards", "state of line was blank before and signed afterwards", "state of line was blank before and signed afterwards", "state of line was blank before and signed afterwards"]}
{"id": "Endorse the check|5", "answers": ["location of check was in hand before and in bank afterwards", "location of check was in hand before and in bank afterwards", "location of money was in the drawer before and in the bank afterwards", "location of check was in hand before and deposited afterwards", "location of check was in hand before and deposited afterwards", "location of money was in the bank before and in the check afterwards", "location of check was in hand before and deposited afterwards", "location of money was in the bank before and in the check afterwards", "location of check was in hand before and deposited afterwards"]}
{"id": "How to build a fire|1", "answers": ["state of firewood was whole before and cut afterwards", "location of firewood was in the store before and at home afterwards", "state of firewood was uncut before and cut afterwards", "state of firewood was uncut before and cut afterwards", "state of firewood was uncut before and cut afterwards", "state of firewood was uncut before and cut afterwards"]}
{"id": "How to build a fire|2", "answers": ["location of small dry materials was in storage before and in hand afterwards", "location of small dry materials was in storage before and in hand afterwards", "location of small dry materials was in the shed before and in hand afterwards", "location of small dry materials was in the shed before and in hand afterwards", "location of tinder was in the box before and in hand afterwards", "location of small dry materials was in the shed before and in hand afterwards", "state of materials was unselected before and selected afterwards", "state of materials was dry before and wet afterwards", "location of small dry materials was in the shed before and in hand afterwards"]}
{"id": "How to build a fire|3", "answers": ["state of surface was clear before and dry afterwards", "location of small dry materials was in storage before and on the ground afterwards", "state of surface was clear before and covered in small dry materials afterwards", "location of small dry materials was in storage before and on the ground afterwards", "state of surface was clear before and covered in small dry materials afterwards"]}
{"id": "How to build a fire|4", "answers": ["state of fire was absent before and built afterwards", "state of structure was loose before and built afterwards", "state of structure was loose before and built afterwards", "state of fire was absent before and built afterwards", "state of structure was unbuilt before and built afterwards", "state of structure was unbuilt before and built afterwards"]}
{"id": "How to build a fire|5", "answers": ["location of lighter was in the drawer before and on the ground afterwards", "state of fire was unstarted before and started afterwards", "state of lighter was unused before and used afterwards", "state of fire was unlit before and lit afterwards", "state of lighter was closed before and open afterwards", "state of lighter was unused before and used afterwards", "state of lighter was closed before and open afterwards", "state of lighter was unused before and used afterwards", "state of lighter was closed before and open afterwards", "state of lighter was unused before and used afterwards"]}
{"id": "Bake a potato|1", "answers": ["state of potatoes was considered before and chosen afterwards", "knowledge of potato was unselected before and selected afterwards", "location of potatoes was in the store before and in your home afterwards", "location of potatoes was at the store before and at home afterwards", "location of potatoes was at the store before and at home afterwards"]}
{"id": "Bake a potato|2", "answers": ["location of water was in faucet before and in sink afterwards", "cleanness of potato was dirty before and washed afterwards", "wetness of potato was dry before and wet afterwards", "location of water was in faucet before and in sink afterwards", "cleanness of potato was dirty before and clean afterwards", "wetness of potato was dry before and wet afterwards", "location of soap was in bottle before and in sink afterwards", "cleanness of potato was dirty before and clean afterwards", "wetness of potato was dry before and wet afterwards", "cleanness of potato was dirty before and washed afterwards", "cleanness of potato was dirty before and clean afterwards", "wetness of potato was dry before and wet afterwards"]}
{"id": "Bake a potato|3", "answers": ["location of pepper was in a jar before and on the potato afterwards", "state of potato was bare before and seasoned afterwards", "location of olive oil was in bottle before and on potato afterwards", "state of potato was plain before and seasoned afterwards", "location of pepper was in jar before and on potato afterwards", "state of potato was plain before and seasoned afterwards", "location of pepper was in jar before and on potato afterwards", "state of potato was plain before and seasoned afterwards", "location of pepper was in jar before and on potato afterwards", "location of oil was in bottle before and on potato afterwards", "location of pepper was in jar before and on potato afterwards", "location of pepper was in jar before and on potato afterwards", "location of pepper was in the pantry before and on the potato afterwards", "location of oil was in bottle before and on potato afterwards"]}
{"id": "Bake a potato|4", "answers": ["location of potato was in sink before and on plate afterwards", "location of plate was in the cupboard before and on the counter afterwards", "location of potato was in sink before and on plate afterwards", "location of plate was in the cupboard before and on the counter afterwards", "location of potato was in the microwave before and on the plate afterwards", "location of plate was in the cupboard before and on the counter afterwards", "location of plate was in the cupboard before and on the counter afterwards", "location of plate was in the cupboard before and on the counter afterwards", "location of plate was in the cupboard before and on the counter afterwards", "location of potato was in the microwave before and on the plate afterwards", "location of potato was in the microwave before and on the plate afterwards", "location of potato was in the microwave before and on the plate afterwards", "temperature of potato was cold before and hot afterwards", "weight of plate was lighter before and heavier afterwards", "volume of microwave was full before and empty afterwards", "volume of plate was empty before and full afterwards", "weight of plate was lighter before and heavier afterwards"]}
{"id": "Bake a potato|5", "answers": ["location of plate was on counter before and in microwave afterwards", "power of microwave was off before and on afterwards", "temperature of plate was cold before and hot afterwards", "temperature of plate was room temperature before and hot afterwards", "temperature of potato was cold before and hot afterwards", "temperature of plate was cool before and hot afterwards", "temperature of microwave was cold before and hot afterwards", "temperature of potato was cold before and hot afterwards", "temperature of plate was room temperature before and hot afterwards", "temperature of potato was cold before and hot afterwards", "temperature of microwave was cold before and hot afterwards", "temperature of potato was cold before and hot afterwards", "temperature of microwave was cold before and hot afterwards", "temperature of potato was cold before and hot afterwards", "temperature of plate was cool before and hot afterwards"]}
{"id": "Bake a potato|6", "answers": ["temperature of potato was cool before and hot afterwards", "power of microwave was off before and on afterwards", "temperature of potato was cold before and hot afterwards", "temperature of plate was cold before and hot afterwards", "temperature of potato was cold before and hot afterwards", "temperature of potato was cold before and hot afterwards", "temperature of plate was cool before and hot afterwards", "temperature of potato was cold before and hot afterwards", "temperature of plate was cool before and hot afterwards", "temperature of potato was cold before and hot afterwards", "temperature of potato was cold before and hot afterwards", "temperature of potato was cold before and hot afterwards", "temperature of potato was cold before and hot afterwards", "temperature of microwave was cold before and hot afterwards", "temperature of potato was cold before and hot afterwards", "temperature of potato was cold before and hot afterwards", "temperature of microwave was cold before and hot afterwards", "temperature of potato was cold before and hot afterwards", "temperature of microwave was cold before and hot afterwards", "temperature of potato was cold before and hot afterwards", "temperature of microwave was cold before and hot afterwards"]}
{"id": "Bake a potato|7", "answers": ["location of potato was in microwave before and on plate afterwards", "location of plate was in the microwave before and in the hand afterwards", "location of potato was in microwave before and on plate afterwards", "location of plate was in the microwave before and on the table afterwards", "location of potato was in microwave before and on plate afterwards", "location of plate was in microwave before and on table afterwards", "location of plate was in microwave before and on table afterwards"]}
{"id": "Jump start a car|1", "answers": ["state of car was considered before and found afterwards", "location of you was elsewhere before and at another car afterwards", "state of car was considered before and found afterwards", "location of you was elsewhere before and at another car afterwards"]}
{"id": "Jump start a car|2", "answers": ["location of working car was far before and near afterwards", "location of working car was far before and near afterwards", "location of working car was far before and near afterwards", "location of car was far before and parked nearby afterwards", "location of working car was far before and parked nearby afterwards", "location of car was parked before and parked nearby afterwards", "location of working car was far before and near afterwards"]}
{"id": "Jump start a car|3", "answers": ["open hoods of cars was closed before and open afterwards", "state of hoods was closed before and open afterwards", "location of keys was missing before and present afterwards", "location of car was parked before and in the driveway afterwards", "location of car was in garage before and on the street afterwards", "state of car was off before and on afterwards", "state of car was off before and on afterwards", "location of car was in garage before and on street afterwards", "state of car was off before and on afterwards", "state of car was off before and on afterwards", "state of hoods was closed before and open afterwards"]}
{"id": "Jump start a car|4", "answers": ["knowledge of location of battery was unknown before and known afterwards", "location of you was elsewhere before and at the car afterwards", "location of you was looking for a car before and at the car afterwards", "location of you was looking for a car before and at the car afterwards", "location of you was looking for another car before and at another car afterwards"]}
{"id": "Jump start a car|5", "answers": ["state of jump cables was unused before and used afterwards", "state of jump cables was unused before and connected afterwards", "state of cables was loose before and tight afterwards", "state of car was off before and on afterwards", "state of jump cables was unused before and connected afterwards", "state of cables was loose before and tight afterwards", "state of jump cables was unconnected before and connected afterwards", "state of car was off before and on afterwards", "state of cables was loose before and tight afterwards"]}
{"id": "Jump start a car|6", "answers": ["state of working car was off before and on afterwards", "state of working car was off before and started afterwards", "state of working car was off before and started afterwards", "state of car was off before and on afterwards", "state of working car was off before and started afterwards", "electric conductivity of working car was turned off before and turned on afterwards", "location of jump cables was missing before and connected afterwards", "location of working car was at home before and at work afterwards", "location of working car was at home before and at work afterwards", "location of working car was at home before and at work afterwards"]}
{"id": "Jump start a car|7", "answers": ["state of disabled vehicle was unchecked before and checked afterwards", "state of disabled vehicle was off before and on afterwards", "state of working car was off before and started afterwards", "state of working car was off before and started afterwards", "state of working car was off before and on afterwards"]}
{"id": "Jump start a car|8", "answers": ["location of jumper cables was connected to the other car before and disconnected from the other car afterwards", "state of car was off before and on afterwards", "state of disabled vehicle was off before and on afterwards", "state of disabled vehicle was off before and on afterwards", "state of car was off before and started afterwards", "state of car was off before and started afterwards", "state of jumper cables was connected before and disconnected afterwards", "state of working car was off before and on afterwards", "state of working car was off before and on afterwards", "state of car was off before and on afterwards", "state of working car was off before and on afterwards"]}
{"id": "Jump start a car|9", "answers": ["state of disabled car was off before and on afterwards", "state of car was off before and running afterwards", "state of disabled car was off before and running afterwards", "state of car was off before and on afterwards", "state of car was off before and on afterwards", "state of car was off before and on afterwards", "state of disabled car was off before and running afterwards", "state of disabled car was off before and on afterwards", "state of disabled car was off before and on afterwards", "state of disabled car was off before and on afterwards"]}
{"id": "Install a game on the Playstation|1", "answers": ["ownership of ps3 was owned by gameStop before and owned by you afterwards", "ownership of ps3 was unpurchased before and purchased afterwards", "location of money was in wallet before and in store afterwards", "location of money was in wallet before and in store afterwards", "location of money was in wallet before and in store afterwards", "location of money was in wallet before and in store afterwards", "location of money was in wallet before and in store afterwards"]}
{"id": "Install a game on the Playstation|2", "answers": ["state of tv was unconnected before and connected afterwards", "state of tv was unconnected before and connected afterwards", "state of ps3 was unconnected before and connected afterwards", "state of tv was unconnected before and connected afterwards", "state of tv was unconnected before and connected afterwards", "electric conductivity of tv was turned off before and turned on afterwards", "state of tv was off before and on afterwards", "state of tv was off before and on afterwards", "state of tv was off before and on afterwards", "state of tv was off before and on afterwards", "state of tv was off before and on afterwards"]}
{"id": "Install a game on the Playstation|3", "answers": ["power of psp was off before and on afterwards", "state of psp was unplugged before and plugged afterwards", "state of psp was unplugged before and plugged afterwards", "state of psp was unplugged before and plugged afterwards", "electric conductivity of psp was turned off before and turned on afterwards", "electric conductivity of psp was turned off before and turned on afterwards", "state of psp was unplugged before and plugged afterwards", "state of psp was unplugged before and plugged afterwards", "electric conductivity of psp was turned off before and turned on afterwards"]}
{"id": "Install a game on the Playstation|4", "answers": ["state of button was unpushed before and pushed afterwards", "state of button was unpushed before and pushed afterwards", "state of power button was unpushed before and pushed afterwards", "state of power button was unpushed before and pushed afterwards", "electric conductivity of power button was unplugged before and plugged in afterwards", "state of power button was unpushed before and pushed afterwards"]}
{"id": "Install a game on the Playstation|5", "answers": ["state of profile was unmade before and made afterwards", "state of profile was empty before and created afterwards", "state of profile was empty before and created afterwards", "state of profile was unmade before and created afterwards"]}
{"id": "Install a game on the Playstation|6", "answers": ["state of system software updates was uninstalled before and installed afterwards", "state of updates was uninstalled before and installed afterwards", "state of updates was uninstalled before and installed afterwards", "state of software updates was uninstalled before and installed afterwards", "state of updates was uninstalled before and installed afterwards"]}
{"id": "Install a game on the Playstation|7", "answers": ["state of game was uninstalled before and installed afterwards", "state of game was uninstalled before and installed afterwards", "state of game was uninstalled before and installed afterwards", "state of game was uninstalled before and installed afterwards"]}
{"id": "Install a game on the Playstation|8", "answers": ["state of game was unselected before and selected afterwards", "state of game was uninstalled before and installed afterwards", "state of game was unselected before and selected afterwards"]}
{"id": "Make a purchase on Amazon|1", "answers": ["state of browser was closed before and open afterwards", "state of browser was closed before and open afterwards", "state of browser was closed before and open afterwards", "state of browser was closed before and open afterwards"]}
{"id": "Make a purchase on Amazon|2", "answers": ["state of the web address bar was closed before and open afterwards", "state of the web address bar was empty before and containing a letter s afterwards", "state of the web address bar was empty before and containing a letter s afterwards", "state of the web browser was closed before and open afterwards", "state of the web browser was closed before and open afterwards", "state of the web browser was blank before and entered www.amazon.com afterwards", "state of the web browser was off before and on afterwards", "location of the letter s was in the keyboard before and in the web browser afterwards"]}
{"id": "Make a purchase on Amazon|3", "answers": ["state of search bar was empty before and filled with text afterwards", "state of search bar was empty before and filled with description afterwards", "state of description was missing before and entered afterwards", "state of name was missing before and entered afterwards", "state of description was missing before and entered afterwards", "state of search bar was empty before and entered afterwards"]}
{"id": "Make a purchase on Amazon|4", "answers": ["state of item was unselected before and selected afterwards", "state of item was unselected before and selected afterwards", "state of item was unselected before and selected afterwards", "step of item was unselected before and selected afterwards"]}
{"id": "Make a purchase on Amazon|5", "answers": ["state of quantity was unselected before and selected afterwards", "state of quantity was unselected before and selected afterwards", "state of quantity was unselected before and selected afterwards", "state of quantity was unselected before and selected afterwards"]}
{"id": "Make a purchase on Amazon|6", "answers": ["state of cart was open before and closed afterwards", "state of cart was open before and closed afterwards", "step of \"add to cart\" was unselected before and selected afterwards", "state of cart was open before and closed afterwards", "state of cart was open before and closed afterwards"]}
{"id": "Make a purchase on Amazon|7", "answers": ["state of cart was closed before and open afterwards", "state of cart was empty before and full afterwards", "state of cart was empty before and full afterwards", "step of cart was unselected before and selected afterwards", "state of cart was empty before and full afterwards"]}
{"id": "Make a purchase on Amazon|8", "answers": ["step of cart was unselected before and selected afterwards", "state of cart was unselected before and selected afterwards", "step of proceed to checkout was unclicked before and clicked afterwards", "state of cart was unselected before and selected afterwards"]}
{"id": "Make a purchase on Amazon|9", "answers": ["state of address was unselected before and selected afterwards", "step of mailing address was unselected before and selected afterwards", "step of proceed to checkout was unclickd before and clicked afterwards", "step of cart was unselected before and selected afterwards", "step of shipping address was unselected before and selected afterwards", "step of cart was unselected before and selected afterwards"]}
{"id": "Make a purchase on Amazon|10", "answers": ["state of payment method was unselected before and selected afterwards", "step of payment method was unselected before and selected afterwards", "step of payment method was unselected before and selected afterwards", "step of payment method was unselected before and selected afterwards"]}
{"id": "Make a purchase on Amazon|11", "answers": ["state of gift card was unselected before and selected afterwards", "state of code was unselected before and selected afterwards", "state of code was unselected before and selected afterwards", "state of gift card was unselected before and selected afterwards", "state of promotional code was unselected before and selected afterwards", "state of code was unselected before and selected afterwards", "state of gift card was unselected before and selected afterwards", "state of promotional code was unselected before and selected afterwards", "state of code was unselected before and selected afterwards", "state of gift card was unselected before and selected afterwards", "state of code was unselected before and selected afterwards", "state of gift card was unselected before and selected afterwards", "state of code was unselected before and selected afterwards", "state of code was unselected before and selected afterwards", "state of code was unselected before and selected afterwards", "state of code was unselected before and selected afterwards", "state of code was unselected before and selected afterwards", "state of code was unselected before and selected afterwards", "state of code was unselected before and selected afterwards", "state of code was unselected before and selected afterwards", "state of code was unselected before and selected afterwards", "state of code was unselected before and selected afterwards", "state of code was unselected before"]}
{"id": "Make a purchase on Amazon|12", "answers": ["state of order was unreviewed before and reviewed afterwards", "state of order was unreviewed before and reviewed afterwards", "state of order was unprocessed before and processed afterwards"]}
{"id": "Make a purchase on Amazon|13", "answers": ["state of order was unplaced before and placed afterwards", "state of order was unplaced before and placed afterwards", "state of cart was open before and closed afterwards", "state of order was unplaced before and placed afterwards", "state of cart was unselected before and selected afterwards", "state of order was unreviewed before and reviewed afterwards", "state of cart was unselected before and selected afterwards", "state of order was unplaced before and placed afterwards"]}
{"id": "Turn on the radio in the car|1", "answers": ["state of the car was locked before and unlocked afterwards", "state of the key was in the ignition before and out of the ignition afterwards", "state of the car was locked before and unlocked afterwards", "state of the car was locked before and unlocked afterwards", "state of the car was locked before and unlocked afterwards", "state of the car was locked before and unlocked afterwards", "state of the key was in the ignition before and out of the ignition afterwards", "state of the car was locked before and unlocked afterwards", "state of the car was unopened before and opened afterwards", "state of the key was unactivated before and activated afterwards", "state of the car was locked before and unlocked afterwards"]}
{"id": "Turn on the radio in the car|2", "answers": ["state of door was closed before and open afterwards", "state of door was locked before and unlocked afterwards", "state of door was closed before and open afterwards", "state of door was closed before and open afterwards", "state of door was locked before and unlocked afterwards", "state of door was closed before and open afterwards", "state of door was closed before and open afterwards", "state of door was locked before and unlocked afterwards", "state of door was closed before and open afterwards", "state of door was locked before and unlocked afterwards"]}
{"id": "Turn on the radio in the car|3", "answers": ["location of person was outside the car before and inside the car afterwards", "state of seat was empty before and occupied afterwards", "location of person was standing before and sitting afterwards", "location of person was outside the car before and inside the car afterwards", "location of person was outside the car before and inside the car afterwards"]}
{"id": "Turn on the radio in the car|4", "answers": ["location of key was in the glove box before and in the ignition afterwards", "location of key was outside ignition before and inside ignition afterwards", "location of key was in the ignition before and in the door afterwards", "location of key was outside ignition before and inside ignition afterwards", "location of key was in the ignition before and in the door afterwards", "location of key was outside ignition before and inside ignition afterwards", "location of key was in the ignition before and in the door afterwards", "location of key was in the ignition before and in the door afterwards", "location of key was in the ignition before and in the door afterwards", "location of key was in the ignition before and in the door afterwards", "location of key was in the ignition before and in the door afterwards"]}
{"id": "Turn on the radio in the car|5", "answers": ["state of button was unpressed before and pressed afterwards", "state of key was turned before and turned afterwards", "state of ignition button was unpressed before and pressed afterwards", "state of key was turned before and turned afterwards", "state of key was turned before and turned afterwards", "state of ignition button was unpressed before and pressed afterwards", "state of key was turned before and turned afterwards", "state of ignition button was unpressed before and pressed afterwards", "state of key was turned before and turned afterwards", "state of ignition button was unpressed before and pressed afterwards", "state of key was turned before and turned afterwards", "state of ignition button was unpressed before and pressed afterwards", "state of key was turned before and turned afterwards"]}
{"id": "Turn on the radio in the car|6", "answers": ["state of radio button was unplugged before and plugged in afterwards", "state of radio button was unplugged before and pressed afterwards", "state of radio button was unplugged before and pressed afterwards", "state of radio button was unplugged before and pressed afterwards", "state of radio button was unplugged before and pressed afterwards", "state of radio button was unplugged before and pressed afterwards", "state of radio button was unplugged before and pressed afterwards", "state of radio button was unplugged before and pressed afterwards", "state of radio button was unplugged before and pressed afterwards"]}
{"id": "Turn on the radio in the car|7", "answers": ["state of radio was off before and on afterwards", "state of radio button was unpressed before and pressed afterwards", "state of radio was off before and on afterwards", "state of radio button was unpressed before and pressed afterwards", "state of radio was off before and on afterwards", "state of radio button was unpressed before and pressed afterwards", "state of radio button was unpressed before and pressed afterwards", "state of radio button was unpressed before and pressed afterwards", "state of radio button was unpressed before and pressed afterwards", "state of radio button was unpressed before and pressed afterwards", "state of radio was off before and on afterwards"]}
{"id": "apply for graduate school|1", "answers": ["state of programs was considered before and selected afterwards", "knowledge of programs was unselected before and selected afterwards", "state of programs was considered before and selected afterwards", "state of programs was considered before and selected afterwards"]}
{"id": "apply for graduate school|2", "answers": ["state of session was unattended before and attended afterwards", "state of information session was unattended before and attended afterwards", "state of person was absent before and present afterwards", "state of person was alone before and with a presenter afterwards", "state of person was searching for programs before and attending information session afterwards", "state of information session was unattended before and attended afterwards"]}
{"id": "apply for graduate school|3", "answers": ["state of tests was unadministered before and administered afterwards", "state of tests was unpassed before and passed afterwards", "state of tests was incomplete before and complete afterwards", "state of tests was unpassed before and passed afterwards", "state of tests was incomplete before and passed afterwards", "state of tests was unadministered before and administered afterwards"]}
{"id": "apply for graduate school|4", "answers": ["state of essay was unread before and read afterwards", "state of personal statement was unread before and prepared afterwards", "state of test was unpassed before and passed afterwards", "state of essay was unwritten before and written afterwards", "state of personal statement was unread before and read afterwards", "state of test was unpassed before and passed afterwards", "state of personal statement was unread before and read afterwards"]}
{"id": "apply for graduate school|5", "answers": ["location of other relevent material was in the hands of the person before and in the person's possession afterwards", "location of other relerent material was in the library before and in the person's possession afterwards", "state of test was unread before and read afterwards", "state of test was unread before and read afterwards", "state of personal statement was ungathered before and gathered afterwards", "state of other material was ungathered before and gathered afterwards", "state of test was unready before and ready afterwards", "state of personal statement was ungathered before and gathered afterwards"]}
{"id": "apply for graduate school|6", "answers": ["state of application was unsubmitted before and submitted afterwards", "state of application was incomplete before and complete afterwards", "state of application was unsubmitted before and submitted afterwards", "state of application was unprocessed before and processed afterwards", "state of application was unprocessed before and submitted afterwards"]}
{"id": "apply for graduate school|7", "answers": ["state of interviews was unmade before and made afterwards", "state of interviews was unaccepted before and accepted afterwards", "state of interviews was unaccepted before and accepted afterwards", "state of interviews was unaccepted before and accepted afterwards", "state of interviews was unmade before and made afterwards", "state of interviews was unmade before and made afterwards", "state of interviews was unstarted before and started afterwards", "state of interviews was unstarted before and started afterwards", "state of interviews was unstarted before and started afterwards"]}
{"id": "Using a dishwasher to clean dishes|1", "answers": ["location of dishes was in the sink before and in the dishwasher afterwards", "location of tap water was in faucet before and in dishwasher afterwards", "moisture of dishes was dry before and wet afterwards", "state of dishes was dry before and wet afterwards", "state of dishes was dry before and wet afterwards", "location of tap water was in faucet before and in dishwasher afterwards", "volume of dishwasher was empty before and full afterwards", "volume of dishwasher was empty before and full afterwards", "location of water was in pipes before and in dishwasher afterwards", "location of dishes was in hand before and in dishwasher afterwards", "location of dishes was in hand before and in dishwasher afterwards", "volume of dishwasher was empty before and full afterwards"]}
{"id": "Using a dishwasher to clean dishes|2", "answers": ["location of dishes was in the hand before and in the dishwasher afterwards", "location of dishes was outside of dishwasher before and inside of dishwasher afterwards", "location of dishes was outside of dishwasher before and inside of dishwasher afterwards", "location of dishes was outside of dishwasher before and inside of dishwasher afterwards", "location of dishes was outside of dishwasher before and inside of dishwasher afterwards", "location of dishes was outside of dishwasher before and inside of dishwasher afterwards", "location of dishes was outside of dishwasher before and inside of dishwasher afterwards", "location of dishes was outside of dishwasher before and inside of dishwasher afterwards", "location of dishes was outside of dishwasher before and inside of dishwasher afterwards"]}
{"id": "Using a dishwasher to clean dishes|3", "answers": ["location of detergent was in the container before and in the dishwasher afterwards", "location of detergent was in the container before and in the dishwasher afterwards", "location of detergent was in the container before and in the dishwasher afterwards", "location of dishwashers was outside of dishwasher before and inside of dishwasher afterwards", "location of detergent was in the container before and in the dishwasher afterwards", "location of dishwashers was outside of dishwasher before and inside of dishwasher afterwards", "location of detergent was in the container before and in the dishwasher afterwards", "location of detergent was in the container before and in the dishwasher afterwards", "location of detergent was in the container before and in the dishwasher afterwards", "location of detergent was in the container before and in the dishwasher afterwards", "location of detergent was in the container before and in the dishwasher afterwards", "location of detergent was in the container before and in the dishwasher afterwards", "location of detergent was in the container before and in the dishwasher afterwards", "location of detergent was in the container before and in the dishwasher afterwards", "location of detergent was in the container before and in the dishwasher afterwards", "location of detergent was in the container before and in the"]}
{"id": "Using a dishwasher to clean dishes|4", "answers": ["state of dishwasher was off before and on afterwards", "power of dishwasher was off before and on afterwards", "power of dishwasher was off before and on afterwards", "temperature of water was cold before and warm afterwards", "temperature of dishwasher was cool before and warm afterwards", "power of program was off before and on afterwards", "temperature of dishwasher was cool before and warm afterwards", "temperature of detergent was cool before and warm afterwards", "temperature of dishwasher was cool before and warm afterwards", "temperature of water was cold before and warm afterwards", "temperature of dishwasher was cool before and warm afterwards", "temperature of detergent was cold before and warm afterwards", "temperature of dishwasher was cold before and warm afterwards", "temperature of detergent was cold before and warm afterwards", "temperature of dishwasher was cold before and warm afterwards", "temperature of dishwasher was cold before and warm afterwards", "temperature of dishwasher was cold before and warm afterwards", "temperature of dishwasher was cool before and warm afterwards", "temperature of detergent was cold before and warm afterwards", "temperature of dishwasher was cool before and warm afterwards", "temperature of dishwasher was cool before and warm afterwards", "temperature of dishwasher was cold before and warm afterwards", "temperature of detergent was cold before and warm afterwards", "temperature of dishwasher was cold"]}
{"id": "Using a dishwasher to clean dishes|5", "answers": ["location of dishes was in the hand before and in the dishwasher afterwards", "location of dishes was in hand before and in the dishwasher afterwards", "location of dishes was in hand before and in the dishwasher afterwards", "location of dishes was in hand before and in the dishwasher afterwards", "location of dishes was in hand before and in the dishwasher afterwards", "location of dishes was in hand before and in the dishwasher afterwards", "location of dishes was in hand before and in the dishwasher afterwards", "power of dishwasher was off before and on afterwards", "volume of dishwasher was empty before and full afterwards", "location of dishes was in hand before and in the dishwasher afterwards", "volume of dishwasher was empty before and full afterwards"]}
{"id": "Refill the tank of a gas car|1", "answers": ["location of car was at home before and at gas station afterwards", "location of gas station was in the distance before and in the car's path afterwards", "location of gas station was in the distance before and in the car's path afterwards", "location of gas station was far before and near afterwards", "location of gas station was in the distance before and in the car's path afterwards", "location of gas station was far before and near afterwards", "location of gas station was in the distance before and in the car's path afterwards", "location of gas station was far before and near afterwards", "location of gas station was far before and near afterwards", "location of gas station was far before and near afterwards", "location of gas station was far before and near afterwards"]}
{"id": "Refill the tank of a gas car|2", "answers": ["location of car was at home before and at gas station afterwards", "location of car was at home before and at gas station afterwards", "location of car was at home before and at gas station afterwards", "location of car was at home before and at gas station afterwards", "location of car was at home before and at gas station afterwards", "location of gas pump was empty before and occupied afterwards", "location of gas station was empty before and occupied afterwards", "location of gas station was empty before and occupied afterwards", "location of gas station was at home before and at gas station afterwards", "location of gas pump was empty before and occupied afterwards", "location of gas station was at home before and at gas pump afterwards"]}
{"id": "Refill the tank of a gas car|3", "answers": ["location of credit card was in wallet before and in gas pump afterwards", "location of credit card was in wallet before and in gas pump afterwards", "location of credit card was in wallet before and in gas pump afterwards", "location of credit card was in wallet before and in gas pump afterwards", "location of credit card was in wallet before and in gas pump afterwards", "location of credit card was in wallet before and in gas pump afterwards", "location of credit card was in wallet before and in gas pump afterwards", "location of credit card was in wallet before and in gas pump afterwards", "location of credit card was in wallet before and in gas pump afterwards"]}
{"id": "Refill the tank of a gas car|4", "answers": ["state of fuel grade was unselected before and selected afterwards", "state of fuel grade was unselected before and selected afterwards", "state of fuel grade was unselected before and selected afterwards", "state of fuel grade was unselected before and selected afterwards", "state of fuel grade was unselected before and selected afterwards"]}
{"id": "Refill the tank of a gas car|5", "answers": ["state of fuel was unselected before and selected afterwards", "state of fuel was unselected before and selected afterwards", "state of fuel was unselected before and selected afterwards", "state of fuel was unselected before and selected afterwards", "state of fuel was unselected before and selected afterwards", "state of fuel was unselected before and selected afterwards", "state of fuel was unselected before and selected afterwards", "state of fuel was unselected before and selected afterwards", "state of fuel was unselected before and selected afterwards", "state of fuel was unselected before and selected afterwards", "state of fuel pump was off before and on afterwards", "state of fuel was unselected before and selected afterwards", "state of fuel was unselected before and selected afterwards"]}
{"id": "Refill the tank of a gas car|6", "answers": ["location of nozzle was in hand before and in gas tank afterwards", "location of nozzle was in hand before and in gas tank afterwards", "location of nozzle was in hand before and in gas tank afterwards", "state of gas was unfueled before and fueled afterwards", "state of gas was unfueled before and fueled afterwards", "location of nozzle was in hand before and in gas tank afterwards", "location of nozzle was in hand before and in gas afterwards", "location of nozzle was in hand before and in gas afterwards", "state of gas was unfueled before and fueled afterwards", "state of credit card was selected before and selected afterwards", "state of credit card was unselected before and selected afterwards", "state of gas was unfueled before and fueled afterwards", "state of nozzle was unplugged before and plugged afterwards", "state of gas was unfueled before and fueled afterwards", "state of gas was unfueled before and fueled afterwards"]}
{"id": "Buying snacks in a grocery store |1", "answers": ["location of you was at home before and at the store afterwards", "location of you was at home before and at the store afterwards", "location of you was at home before and at the store afterwards", "location of you was at home before and at the store afterwards"]}
{"id": "Buying snacks in a grocery store |2", "answers": ["location of you was at home before and at the store afterwards", "location of snacks was at store before and at home afterwards", "location of snacks was at store before and at home afterwards", "location of snacks was at store before and at home afterwards", "location of snacks was at store before and at home afterwards", "location of snacks was at store before and at home afterwards"]}
{"id": "Buying snacks in a grocery store |3", "answers": ["location of basket was on the counter before and in the car afterwards", "location of snacks was in the store before and in the car afterwards", "location of basket was in the store before and in the car afterwards", "location of snacks was in the store before and in the basket afterwards", "location of snacks was in the store before and in the basket afterwards", "location of basket was in the store before and in the car afterwards", "location of snacks was in the store before and in the basket afterwards", "location of snacks was in the store before and in the basket afterwards", "location of snacks was in the store before and in the basket afterwards"]}
{"id": "Buying snacks in a grocery store |4", "answers": ["location of you was in line before and in the register afterwards", "state of line was empty before and occupied afterwards", "state of register was empty before and occupied afterwards", "state of line was empty before and occupied afterwards", "location of you was outside of register before and inside register afterwards", "state of register was empty before and full afterwards", "location of person was outside of register before and inside register afterwards", "location of person was outside of register before and inside register afterwards"]}
{"id": "Buying snacks in a grocery store |5", "answers": ["ownership of snacks was owned by the store before and owned by the shopper afterwards", "ownership of snacks was owned by the store before and owned by the shopper afterwards", "location of money was in the register before and in the shopper's pocket afterwards", "location of cash was in the register before and in the shopper's hand afterwards", "location of money was in the register before and in the shopper's hand afterwards", "location of cash was in the register before and in the shopper's hand afterwards", "location of cash was in the register before and in the shopper's hand afterwards", "location of cash was in the register before and in the shopper's hand afterwards", "ownership of snacks was owned by the store before and owned by the shopper afterwards", "location of cash was in the register before and in the shopper's hand afterwards", "location of cash was in the register before and in the shopper's hand afterwards"]}
{"id": "Cook whole fish|1", "answers": ["ownership of fish was owned by store before and bought by you afterwards", "location of money was in wallet before and in fish shop afterwards", "ownership of fish was owned by store before and bought by you afterwards", "location of fish was at store before and at home afterwards", "ownership of fish was at store before and bought by you afterwards", "location of money was in wallet before and in fish shop afterwards", "location of fish was at store before and at home afterwards", "ownership of fish was at store before and bought by you afterwards", "location of fish was at store before and at home afterwards"]}
{"id": "Cook whole fish|2", "answers": ["cleanness of fish was dirty before and clean afterwards", "state of fish was covered in dirt before and clean afterwards", "cleanness of fish was covered in dirt before and clean afterwards", "cleanness of fish was covered in dirt before and clean afterwards", "location of dirt was on fish before and off fish afterwards", "cleanness of fish was covered in dirt before and clean afterwards", "location of dirt was on fish before and off fish afterwards", "cleanness of fish was covered in dirt before and clean afterwards", "location of fish was in the water before and in the sink afterwards", "location of fish was in the water before and in the sink afterwards", "cleanness of sink was clean before and dirty afterwards"]}
{"id": "Cook whole fish|3", "answers": ["state of fish was wet before and dry afterwards", "wetness of fish was wet before and dry afterwards", "state of fish was wet before and dry afterwards", "location of towel was in the closet before and on the table afterwards", "state of fish was wet before and dry afterwards", "wetness of fish was wet before and dry afterwards", "state of fish was wet before and dry afterwards", "location of towel was in the closet before and on the table afterwards", "state of fish was wet before and dry afterwards", "location of fish was in the box before and on the table afterwards", "location of fish was in the box before and on the towel afterwards", "wetness of fish was wet before and dry afterwards"]}
{"id": "Cook whole fish|4", "answers": ["state of fish was raw before and cooked afterwards", "temperature of fish was cold before and hot afterwards", "temperature of deep fryer was cold before and hot afterwards", "temperature of fish was cold before and hot afterwards", "temperature of fish was cold before and hot afterwards", "temperature of deep fryer was cold before and hot afterwards", "temperature of fish was cold before and hot afterwards", "temperature of fish was cold before and hot afterwards", "temperature of fish was cold before and hot afterwards", "temperature of fish was cold before and fried afterwards", "temperature of fish was cold before and hot afterwards", "temperature of fish was cold before and hot afterwards", "temperature of fish was cold before and fried afterwards", "state of fish was raw before and deep fried afterwards", "temperature of fish was cold before and hot afterwards"]}
{"id": "Cook whole fish|5", "answers": ["location of fish was in deep fryer before and out of deep fryer afterwards", "location of fish was inside the deep fryer before and outside the deep fryer afterwards", "location of oil was in fish before and drained afterwards", "location of fish was inside deep fryer before and outside of deep fryer afterwards", "location of oil was in fish before and drained afterwards", "location of fish was inside deep fryer before and outside deep fryer afterwards", "location of fish was inside deep fryer before and outside deep fryer afterwards", "location of oil was in fish before and drained afterwards", "location of fish was inside deep fryer before and outside deep fryer afterwards", "location of fish was inside deep fryer before and outside deep fryer afterwards", "location of oil was in deep fryer before and drained afterwards"]}
{"id": "Cook whole fish|6", "answers": ["location of sauce was in pot before and on fish afterwards", "location of sauce was in pot before and on fish afterwards", "location of sauce was in pot before and on fish afterwards", "location of sauce was in pot before and on fish afterwards", "location of sauce was in pot before and on fish afterwards", "location of sauce was in pot before and on fish afterwards", "location of sauce was in pot before and on fish afterwards", "location of sauce was in pot before and on fish afterwards", "location of sauce was in pot before and on fish afterwards", "location of sauce was in pot before and on fish afterwards", "location of sauce was in pot before and on fish afterwards", "location of sauce was in pot before and on fish afterwards"]}
{"id": "Cook whole fish|7", "answers": ["location of fish was out of sauce before and in sauce afterwards", "temperature of fish was cold before and hot afterwards", "state of fish was raw before and cooked afterwards", "temperature of fish was cold before and hot afterwards", "temperature of fish was cold before and hot afterwards", "temperature of sauce was cold before and hot afterwards", "temperature of fish was cold before and hot afterwards", "temperature of fish was cold before and hot afterwards", "temperature of sauce was cold before and hot afterwards", "temperature of fish was cold before and hot afterwards", "temperature of fish was cold before and hot afterwards", "temperature of fish was cold before and hot afterwards", "temperature of fish was cold before and hot afterwards", "temperature of fish was cold before and hot afterwards", "temperature of fish was cold before and hot afterwards", "location of sauce was in the fridge before and on the stove afterwards", "location of fish was out of sauce before and in sauce afterwards", "location of sauce was in fridge before and on stove afterwards", "temperature of fish was cold before and hot afterwards"]}
{"id": "Cook whole fish|8", "answers": ["location of fish was in the pan before and on the plate afterwards", "location of fish was in the pan before and on the plate afterwards", "location of plate was in the cupboard before and on the table afterwards", "location of fish was in the pan before and on the plate afterwards", "location of plate was in the cupboard before and on the table afterwards", "location of fish was in the pan before and on the plate afterwards", "location of sauce was in the pan before and on the fish afterwards", "location of fish was in the pan before and on the plate afterwards", "location of plate was in the cabinet before and on the table afterwards"]}
{"id": "Watch a movie at theater|1", "answers": ["state of movie was considered before and found afterwards", "state of movie was considered before and found afterwards", "state of movie was considered before and found afterwards", "state of movie was considered before and found afterwards"]}
{"id": "Watch a movie at theater|2", "answers": ["state of ticket was unsold before and sold afterwards", "state of ticket was unsold before and bought online afterwards", "location of money was in wallet before and in cash register afterwards", "location of money was in wallet before and in cash register afterwards", "state of movie was unselected before and selected afterwards", "state of movie was unselected before and selected afterwards", "state of movie was unselected before and selected afterwards", "state of movie was unselected before and selected afterwards", "state of ticket was unpurchased before and purchased afterwards", "state of movie was unselected before and selected afterwards"]}
{"id": "Watch a movie at theater|3", "answers": ["location of car was at home before and at the theater afterwards", "location of car was at home before and at the theater afterwards", "location of person was at home before and at the theater afterwards", "location of person was at home before and at the theater afterwards", "location of person was at home before and at the theater afterwards", "location of person was at home before and at the theater afterwards", "location of person was at home before and at the theater afterwards", "location of person was at home before and at the theater afterwards", "location of person was at home before and at the theater afterwards", "location of person was at home before and at the theater afterwards"]}
{"id": "Watch a movie at theater|4", "answers": ["state of person was waiting before and checked in afterwards", "state of ticket was unread before and read afterwards", "state of person was without a ticket before and with a ticket afterwards", "state of person was without a ticket before and with a ticket afterwards", "state of person was without a ticket before and with a ticket afterwards", "state of person was without a ticket before and with a ticket afterwards", "state of person was without a ticket before and with a ticket afterwards", "state of person was without a ticket before and with a ticket afterwards", "state of person was without a ticket before and with a ticket afterwards", "state of ticket was unread before and read afterwards"]}
{"id": "Watch a movie at theater|5", "answers": ["state of movie was unstarted before and started afterwards", "state of movie was unviewed before and viewed afterwards", "state of movie was unviewed before and viewed afterwards", "state of movie was unviewed before and viewed afterwards", "state of movie was unstarted before and started afterwards"]}
{"id": "Charge cell phone|1", "answers": ["state of phone was unplugged before and plugged in afterwards", "location of phone was in the drawer before and on the table afterwards", "location of person was elsewhere before and in the room afterwards", "location of person was elsewhere before and in the room with the phone afterwards", "state of phone was unplugged before and plugged in afterwards", "location of phone was in the drawer before and on the table afterwards"]}
{"id": "Charge cell phone|2", "answers": ["location of charger was in drawer before and on table afterwards", "location of phone was in pocket before and on table afterwards", "location of charger was in the drawer before and on the table afterwards", "location of charger was in the drawer before and on the table afterwards", "location of charger was in drawer before and on table afterwards", "location of charger was in the drawer before and on the table afterwards", "location of charger was in the drawer before and on the table afterwards"]}
{"id": "Charge cell phone|3", "answers": ["state of phone was unconnected before and connected afterwards", "state of charger was unplugged before and plugged in afterwards", "state of phone was unconnected before and connected afterwards", "electric conductivity of charger was turned off before and turned on afterwards", "state of phone was unplugged before and plugged in afterwards", "state of charger was unplugged before and plugged in afterwards", "state of phone was unconnected before and connected afterwards", "electric conductivity of phone was turned off before and turned on afterwards", "state of charger was unconnected before and connected afterwards", "electric conductivity of phone was turned off before and turned on afterwards", "state of phone was turned off before and turned on afterwards", "state of charger was unconnected before and connected afterwards"]}
{"id": "Charge cell phone|4", "answers": ["state of charger was connected before and disconnected afterwards", "state of phone was unattached before and attached afterwards", "state of charger was connected before and disconnected afterwards", "electric conductivity of charger was turned on before and turned off afterwards", "state of phone was unattached before and connected afterwards", "state of charger was connected before and disconnected afterwards", "state of phone was unattached before and connected afterwards", "electric conductivity of phone was turned on before and turned off afterwards", "state of charger was connected before and disconnected afterwards", "state of phone was turned off before and turned on afterwards", "state of charger was turned off before and turned on afterwards", "state of phone was turned off before and turned on afterwards", "state of phone was turned off before and turned on afterwards"]}
{"id": "Make an apple pie|1", "answers": ["location of sugar was in container before and in bowl afterwards", "location of flour was in bag before and in bowl afterwards", "location of salt was in bag before and in bowl afterwards", "location of sugar was in bag before and in bowl afterwards", "location of flour was in bag before and in bowl afterwards", "location of sugar was in bag before and in bowl afterwards", "location of salt was in bag before and in bowl afterwards", "location of flour was in bag before and in bowl afterwards", "location of sugar was in bag before and in bowl afterwards", "location of salt was in bag before and in bowl afterwards", "location of flour was in bag before and in bowl afterwards", "location of sugar was in bag before and in bowl afterwards", "location of salt was in bag before and in bowl afterwards", "location of sugar was in bag before and in bowl afterwards", "location of flour was in bag before and in bowl afterwards", "location of salt was in bag before and in bowl afterwards", "location of sugar was in bag before and in bowl afterwards"]}
{"id": "Make an apple pie|2", "answers": ["state of butter was whole before and cubed afterwards", "location of butter was in the fridge before and in the bowl afterwards", "composition of butter was whole before and cubed afterwards", "location of butter was in the fridge before and in the bowl afterwards", "location of butter was in the fridge before and in the bowl afterwards", "composition of butter was whole before and cubed afterwards", "location of butter was in the fridge before and in the bowl afterwards", "location of butter was in the fridge before and in the bowl afterwards", "location of butter was in the fridge before and in the bowl afterwards", "location of butter was in the fridge before and in the bowl afterwards", "location of butter was in the fridge before and in the bowl afterwards", "location of salt was in the fridge before and in the bowl afterwards", "location of flour was in the fridge before and in the bowl afterwards", "location of sugar was in the fridge before and in the bowl afterwards", "location of salt was in the fridge before and in the bowl afterwards", "location of sugar was in the fridge before and in the bowl afterwards", "location of sugar was in the fridge before and in the bowl afterwards", "location of flour was in the fridge before and in the bowl afterwards", "location of salt was in the fridge before and in the bowl afterwards"]}
{"id": "Make an apple pie|3", "answers": ["shape of dough was round before and rectangular afterwards", "shape of dough was round before and rectangular afterwards", "state of dough was uncooked before and cooked afterwards", "shape of dough was round before and rectangular afterwards", "shape of dough was round before and square afterwards", "shape of dough was round before and square afterwards", "shape of dough was round before and square afterwards", "shape of dough was round before and square afterwards", "shape of dough was round before and square afterwards", "shape of dough was round before and square afterwards", "cleanness of rolling pin was clean before and dirty afterwards", "shape of dough was round before and square afterwards", "cleanness of rolling pin was clean before and dirty afterwards", "shape of dough was round before and square afterwards"]}
{"id": "Make an apple pie|4", "answers": ["location of brown sugar was in a container before and in a plastic bag afterwards", "location of seasoning was in a container before and in a plastic bag afterwards", "location of brown sugar was in a container before and in a plastic bag afterwards", "location of brown sugar was in the pantry before and in the bowl afterwards", "location of seasoning was in the pantry before and in the bowl afterwards", "location of brown sugar was in the pantry before and in the bowl afterwards", "location of brown sugar was in the pantry before and in the bowl afterwards", "location of brown sugar was in the pantry before and in the bowl afterwards", "location of brown sugar was in the pantry before and in the bowl afterwards", "location of brown sugar was in the pantry before and in the bowl afterwards", "location of brown sugar was in the pantry before and in the bowl afterwards", "location of brown sugar was in the pantry before and in the bowl afterwards", "location of brown sugar was in the pantry before and in the bowl afterwards", "location of brown sugar was in the pantry before and in the bowl afterwards"]}
{"id": "Make an apple pie|5", "answers": ["location of apples was in the core before and in a bowl afterwards", "location of apples was on counter before and in bowl afterwards", "state of apples was whole before and peeled afterwards", "location of core was in the apple before and in a bowl afterwards", "state of apples was whole before and peeled afterwards", "location of core was in the apple before and in a bowl afterwards", "state of apples was whole before and peeled afterwards", "location of core was in the apple before and in a bowl afterwards", "location of core was in the apple before and in a bowl afterwards", "location of peel was on the apple before and in a bowl afterwards", "location of core was in the apple before and in a bowl afterwards", "location of apple was on the counter before and in the bowl afterwards", "location of apple was on the cutting board before and in the bowl afterwards", "location of apple was on the cutting board before and in the bowl afterwards", "location of apple was on the cutting board before and in the bowl afterwards", "location of apple was on cutting board before and in bowl afterwards"]}
{"id": "Make an apple pie|6", "answers": ["location of apples was in bowl before and in bag afterwards", "location of apples was in bowl before and in plastic bag afterwards", "weight of bag was lighter before and heavier afterwards", "fullness of bag was empty before and full afterwards", "location of apples was in the fridge before and in the bowl afterwards", "location of apples was in the fridge before and in the bowl afterwards", "weight of bowl was heavier before and lighter afterwards", "fullness of bag was empty before and full afterwards", "location of apples was in the fridge before and in the bowl afterwards", "weight of bowl was heavier before and lighter afterwards", "location of apples was in the fridge before and in the bowl afterwards", "location of apples was in the fridge before and in the bag afterwards", "location of apples was in the fridge before and in the bowl afterwards", "location of apples was in the fridge before and in the bowl afterwards", "location of apples was in the fridge before and in the bowl afterwards", "location of apples was in the fridge before and in the bowl afterwards"]}
{"id": "Make an apple pie|7", "answers": ["location of pie was in bag before and on counter afterwards", "location of pie was in bag before and on counter afterwards", "state of pie was unassembled before and assembled afterwards", "location of pie was in the bag before and on the counter afterwards", "location of pie was in the bag before and on the counter afterwards"]}
{"id": "Make an apple pie|8", "answers": ["temperature of pie was cool before and hot afterwards", "temperature of pie was cold before and hot afterwards", "temperature of pie was cold before and hot afterwards", "temperature of pan was cool before and hot afterwards", "temperature of pie was cold before and hot afterwards", "temperature of pie was cold before and hot afterwards", "temperature of oven was cold before and hot afterwards", "temperature of pie was cold before and hot afterwards", "temperature of oven was cold before and hot afterwards", "temperature of stove was cold before and hot afterwards", "temperature of oven was cold before and hot afterwards", "temperature of stove was cold before and hot afterwards", "temperature of stove was cold before and hot afterwards", "temperature of oven was cold before and hot afterwards", "temperature of pie was cold before and hot afterwards", "temperature of stove was cool before and hot afterwards", "temperature of pie was cold before and hot afterwards", "temperature of oven was cold before and hot afterwards", "temperature of pie was cold before and hot afterwards", "temperature of stove was cold before and hot afterwards", "temperature of pie was cold before and hot afterwards", "temperature of oven was cold before and hot afterwards", "temperature of pie was cold before and hot afterwards", "temperature of oven was cold before and hot afterwards"]}
{"id": "Make an apple pie|9", "answers": ["temperature of pie was hot before and cool afterwards", "temperature of pie was hot before and cool afterwards", "temperature of pie was hot before and cool afterwards", "temperature of pie was hot before and cool afterwards", "temperature of pie was hot before and cool afterwards", "temperature of pie was hot before and cool afterwards", "temperature of pie was hot before and cool afterwards", "temperature of pie was hot before and cool afterwards", "temperature of pie was hot before and cool afterwards", "temperature of pie was hot before and cool afterwards", "temperature of pie was hot before and cool afterwards", "temperature of pie was hot before and cool afterwards", "temperature of pie was hot before and cool afterwards", "temperature of pie was hot before and cool afterwards", "temperature of pie was hot before and cool afterwards"]}
{"id": "Make an apple pie|10", "answers": ["location of pie was in the oven before and on a serving dish afterwards", "location of pie was in the oven before and on the serving dish afterwards", "location of pie was in the oven before and on the serving dish afterwards", "location of pie was in the oven before and on the serving dish afterwards", "location of pie was in the oven before and on the serving dish afterwards", "location of pie was in the oven before and on the serving dish afterwards", "location of pie was in the oven before and on the serving dish afterwards", "location of pie was in the oven before and on the serving dish afterwards", "location of pie was in the oven before and on the serving dish afterwards", "location of pie was in the oven before and on the serving dish afterwards", "location of pie was in the oven before and on the cutting board afterwards", "location of pie was in the oven before and on the cutting board afterwards", "location of pie was in the oven before and on the cutting board afterwards", "location of pie was in the oven before and on the cutting board afterwards", "location of pie was in the oven before and on the cutting board afterwards", "location of pie was in the oven before and on the cutting board afterwards"]}
{"id": "Repotting a house plant|1", "answers": ["ownership of pot was owned by store before and owned by you afterwards", "location of pot was at store before and at your home afterwards", "ownership of pot was owned by store before and bought by you afterwards", "location of pot was at store before and at your home afterwards", "ownership of pot was owned by store before and bought by you afterwards", "location of pot was at store before and at home afterwards"]}
{"id": "Repotting a house plant|2", "answers": ["location of towel was in cupboard before and on bed afterwards", "location of towel was in cupboard before and on bed afterwards", "location of towel was in closet before and on bed afterwards", "location of towel was in cupboard before and on bed afterwards", "location of towel was in closet before and on bed afterwards", "location of towel was in cupboard before and on bed afterwards", "location of towel was in closet before and on bed afterwards", "location of towel was in drawer before and on bed afterwards", "location of towel was in closet before and on bed afterwards"]}
{"id": "Repotting a house plant|3", "answers": ["location of plant was in pot before and out of pot afterwards", "location of plant was in pot before and removed from pot afterwards", "location of plant was in pot before and removed from pot afterwards", "location of plant was in pot before and on the counter afterwards", "location of plant was in pot before and on the floor afterwards", "location of plant was in pot before and on the table afterwards", "location of plant was in pot before and on the ground afterwards"]}
{"id": "Repotting a house plant|4", "answers": ["location of dirt was in bag before and in pot afterwards", "location of pot was on the table before and on the ground afterwards", "location of dirt was in bag before and in pot afterwards", "volume of pot was empty before and full afterwards", "weight of pot was light before and heavy afterwards", "weight of pot was light before and heavy afterwards", "location of dirt was in the bag before and in the pot afterwards", "weight of pot was light before and heavy afterwards", "volume of pot was empty before and full afterwards", "location of plant was in pot before and in dirt afterwards"]}
{"id": "Repotting a house plant|5", "answers": ["location of plant was outside of pot before and inside of pot afterwards", "location of plant was outside of pot before and inside of pot afterwards", "location of plant was on the counter before and in the pot afterwards", "location of plant was on the table before and in the pot afterwards", "location of plant was on the ground before and in the pot afterwards", "location of plant was on the counter before and in the pot afterwards"]}
{"id": "Repotting a house plant|6", "answers": ["state of plant was dry before and watered afterwards", "wetness of plant was dry before and watered afterwards", "moisture of soil was dry before and wet afterwards", "location of water was in faucet before and in soil afterwards", "location of water was in hose before and in pot afterwards", "moisture of soil was dry before and wet afterwards", "location of water was in hose before and in pot afterwards", "moisture of plant was dry before and wet afterwards"]}
{"id": "Repotting a house plant|7", "answers": ["cleanness of towel was dirty before and clean afterwards", "location of dirt was in pot before and in trash afterwards", "location of towel was on the plant before and in the trash afterwards", "location of plant was on the towel before and in the pot afterwards", "location of towel was on the plant before and in the trash afterwards", "cleanness of pot was dirty before and clean afterwards", "location of plant was on the towel before and in the pot afterwards"]}
{"id": "Building a shelf|1", "answers": ["state of wood was unassembled before and assembled afterwards", "location of wood was at store before and at home afterwards", "location of tools was at store before and at home afterwards", "ownership of wood was owned by store before and bought by you afterwards", "location of wood was at store before and at home afterwards", "location of tools was at store before and at home afterwards", "ownership of brackets was owned by store before and bought by you afterwards", "location of wood was at store before and at home afterwards", "location of wood was at store before and at home afterwards", "ownership of tools was owned by store before and bought by you afterwards", "location of wood was at store before and at home afterwards", "location of wood was at store before and at home afterwards", "ownership of brackets was owned by store before and bought by you afterwards", "ownership of wood was at store before and at home afterwards"]}
{"id": "Building a shelf|2", "answers": ["knowledge of wall was unmeasured before and measured afterwards", "knowledge of wood was unmeasured before and measured afterwards", "state of wall was unmeasured before and measured afterwards", "knowledge of brackets was unmeasured before and measured afterwards", "state of wall was unmeasured before and measured afterwards", "knowledge of wood was unmeasured before and measured afterwards", "knowledge of wall was unmeasured before and measured afterwards"]}
{"id": "Building a shelf|3", "answers": ["size of wood was whole before and cut afterwards", "state of wood was whole before and cut afterwards", "size of wood was whole before and cut afterwards", "size of wood was whole before and cut afterwards", "state of wood was whole before and cut afterwards", "size of wood was whole before and cut to length afterwards"]}
{"id": "Building a shelf|4", "answers": ["state of wood was bare before and stained afterwards", "color of wood was random before and distinctive afterwards", "texture of wood was rough before and smooth afterwards", "texture of wood was rough before and smooth afterwards", "color of wood was random before and distinctive afterwards", "texture of wood was rough before and smooth afterwards", "texture of wood was rough before and smooth afterwards", "color of wood was random before and distinctive afterwards", "texture of wood was rough before and smooth afterwards", "texture of wood was rough before and smooth afterwards", "color of wood was random before and distinctive afterwards"]}
{"id": "Building a shelf|5", "answers": ["state of brackets was uninstalled before and installed afterwards", "location of wood was on ground before and in brackets afterwards", "location of brackets was in toolbox before and on wall afterwards", "state of brackets was uninstalled before and installed afterwards", "location of brackets was in box before and on wall afterwards", "state of brackets was uninstalled before and installed afterwards"]}
{"id": "Building a shelf|6", "answers": ["state of wood shelf was uninstalled before and installed afterwards", "location of wood shelf was on the table before and on the wall afterwards", "location of wood shelf was on the ground before and on the brackets afterwards", "location of wood shelf was on the ground before and on the brackets afterwards", "location of wood shelf was on the ground before and on the brackets afterwards", "state of wood shelf was uninstalled before and installed afterwards", "location of wood shelf was on the ground before and on the brackets afterwards"]}
{"id": "Building a shelf|7", "answers": ["state of shelf was empty before and full afterwards", "location of items was in cabinet before and on shelf afterwards", "weight of shelf was lighter before and heavier afterwards", "weight of support brackets was lighter before and heavier afterwards", "location of items was on the floor before and on the shelf afterwards", "weight of shelf was lighter before and heavier afterwards", "weight of support brackets was lighter before and heavier afterwards", "weight of shelf was lighter before and heavier afterwards"]}
{"id": "Washing dishes|1", "answers": ["location of dishes was on the table before and in the sink afterwards", "location of dishes was on the table before and in the sink afterwards", "location of dishes was on the table before and in the sink afterwards", "location of dishes was on the table before and in the sink afterwards", "location of dishes was on the table before and in the sink afterwards", "location of dishes was on the table before and in the sink afterwards", "location of dishes was on the table before and in the sink afterwards"]}
{"id": "Washing dishes|2", "answers": ["cleanness of sponge was clean before and dirty afterwards", "location of dish soap was in the bottle before and on the sponge afterwards", "weight of bottle was heavier before and lighter afterwards", "location of dish soap was in the bottle before and on the sponge afterwards", "weight of sponge was light before and heavy afterwards", "moisture of sponge was dry before and wet afterwards", "location of dish soap was in the bottle before and on the sponge afterwards", "weight of bottle was heavier before and lighter afterwards", "weight of sponge was light before and heavy afterwards", "wetness of sponge was dry before and wet afterwards", "location of dish soap was in the bottle before and on the sponge afterwards", "cleanness of sponge was clean before and dirty afterwards", "wetness of sponge was dry before and wet afterwards", "location of dish soap was in the bottle before and on the sponge afterwards", "cleanness of sponge was clean before and dirty afterwards"]}
{"id": "Washing dishes|3", "answers": ["cleanness of dishes was dirty before and clean afterwards", "state of the dishes was dirty before and now clean afterwards", "cleanness of dishes was dirty before and clean afterwards", "cleanness of dishes was dirty before and clean afterwards", "cleanness of sponge was clean before and dirty afterwards", "cleanness of dishes was dirty before and clean afterwards", "cleanness of sponge was clean before and dirty afterwards", "cleanness of dishes was dirty before and clean afterwards", "cleanness of sponge was clean before and dirty afterwards"]}
{"id": "Washing dishes|4", "answers": ["location of dishes was in the sink before and in the drying rack afterwards", "location of dishes was in the sink before and on the drying rack afterwards", "location of dishes was in the sink before and on the drying rack afterwards", "location of dishes was in the sink before and on the drying rack afterwards", "location of dishes was in the sink before and on the drying rack afterwards", "location of drying rack was in the cupboard before and on the counter afterwards", "location of dishes was in the sink before and on the drying rack afterwards", "location of dishes was in the sink before and on the drying rack afterwards"]}
{"id": "Washing dishes|5", "answers": ["dryness of dishes was wet before and dry afterwards", "moisture of dishes was wet before and dry afterwards", "wetness of dishes was wet before and dry afterwards", "state of dishes was wet before and dry afterwards", "location of dishes was in the sink before and on the drying rack afterwards", "location of dishes was in the sink before and on the drying rack afterwards", "moisture of rack was dry before and wet afterwards", "location of dishes was in the sink before and on the drying rack afterwards", "location of dishes was in the sink before and on the drying rack afterwards"]}
{"id": "Washing dishes|6", "answers": ["location of dishes was in the sink before and in the drying rack afterwards", "location of dishes was in the sink before and in the drying rack afterwards", "location of dishes was in the sink before and in the drying rack afterwards", "location of dishes was in the sink before and in the drying rack afterwards", "location of dishes was in the sink before and in the drying rack afterwards"]}
{"id": "Make a bed|1", "answers": ["state of mattress was covered before and uncovered afterwards", "state of mattress was covered before and uncovered afterwards", "state of sheets was on mattress before and off mattress afterwards", "state of mattress was covered before and uncovered afterwards", "state of pillow cases was on the mattress before and off the mattress afterwards", "state of sheets was on mattress before and off mattress afterwards", "location of sheets was on mattress before and on the floor afterwards", "location of sheets was on mattress before and on the floor afterwards", "location of mattress was on the bed before and on the floor afterwards", "location of sheets was on mattress before and on the floor afterwards", "location of sheets was on mattress before and on the floor afterwards"]}
{"id": "Make a bed|2", "answers": ["cleanness of sheets was dirty before and clean afterwards", "state of sheets was dirty before and clean afterwards", "location of sheets was on bed before and in washing machine afterwards", "location of sheets was on bed before and in washing machine afterwards", "location of sheets was on bed before and in washing machine afterwards", "state of sheets was dirty before and clean afterwards", "location of sheets was on bed before and in washing machine afterwards"]}
{"id": "Make a bed|3", "answers": ["location of sheet was on bed before and on bed afterwards", "location of fitted sheet was in the linen closet before and on the bed afterwards", "state of bed was bare before and covered afterwards", "location of fitted sheet was in the linen closet before and on the bed afterwards", "location of sheet was on bed before and on bed with fitted sheet afterwards", "state of bed was bare before and covered afterwards", "location of fitted sheet was in the linen closet before and on the bed afterwards", "state of mattress was bare before and covered afterwards"]}
{"id": "Make a bed|4", "answers": ["location of flat sheet was on the floor before and on the mattress afterwards", "location of flat sheet was on the floor before and on the mattress afterwards", "location of sheet was on floor before and on mattress afterwards", "state of mattress was bare before and covered afterwards", "location of sheet was on floor before and on mattress afterwards", "location of flat sheet was on the floor before and on the mattress afterwards", "state of mattress was bare before and covered afterwards", "location of sheet was on the mattress before and on the flat sheet afterwards", "location of flat sheet was on the floor before and on the mattress afterwards", "location of sheet was on the mattress before and on the flat sheet afterwards"]}
{"id": "Make a bed|5", "answers": ["location of comforter was on the floor before and on the mattress afterwards", "location of comforter was on the floor before and on the mattress afterwards", "location of comforter was on the floor before and on the mattress afterwards", "location of comforter was on the floor before and on the mattress afterwards", "location of comforter was on the floor before and on the mattress afterwards", "location of comforter was on the floor before and on the mattress afterwards", "location of comforter was on the floor before and on the mattress afterwards", "weight of mattress was lighter before and heavier afterwards", "location of comforter was on the floor before and on the mattress afterwards", "weight of mattress was lighter before and heavier afterwards", "location of comforter was on the floor before and on the mattress afterwards"]}
{"id": "Make a bed|6", "answers": ["location of pillowcases was on the bed before and on the mattress afterwards", "location of pillowcases was on the bed before and on the floor afterwards", "location of pillowcases was on the bed before and on the floor afterwards", "location of pillowcases was on the bed before and on the floor afterwards", "location of pillowcases was on the bed before and on the floor afterwards", "location of pillowcases was on the bed before and on the floor afterwards", "location of pillowcases was on the bed before and on the floor afterwards", "location of pillowcases was on the bed before and on the floor afterwards", "location of pillowcases was on the bed before and on the floor afterwards", "location of pillowcases was on the bed before and on the floor afterwards", "location of pillowcases was on the bed before and on the floor afterwards", "location of pillowcases was on the bed before and on the floor afterwards", "location of pillowcases was on the bed before and on the floor afterwards"]}
{"id": "Make a bed|7", "answers": ["location of additional pillows was on the floor before and on the mattress afterwards", "location of blankets was on the floor before and on the mattress afterwards", "location of additional pillows was on the floor before and on the mattress afterwards", "location of additional blankets was on the floor before and on the mattress afterwards", "location of additional pillows was on the floor before and on the mattress afterwards", "location of additional blankets was on the floor before and on the mattress afterwards", "location of additional pillows was on the floor before and on the mattress afterwards", "location of additional blankets was on the floor before and on the mattress afterwards", "location of additional pillows was on the floor before and on the mattress afterwards", "location of additional blankets was on the floor before and on the mattress afterwards", "location of additional pillows was on the floor before and on the mattress afterwards", "location of additional blankets was on the floor before and on the mattress afterwards", "location of additional pillows was on the floor before and on the mattress afterwards"]}
{"id": "Create a gmail account|1", "answers": ["state of google chrome was closed before and open afterwards", "state of google chrome was closed before and open afterwards", "state of google chrome was closed before and open afterwards", "state of google chrome was closed before and open afterwards"]}
{"id": "Create a gmail account|2", "answers": ["location of mouse was in the drawer before and on the desk afterwards", "state of the gmail shortcut was unclicked before and clicked afterwards", "state of the gmail shortcut was unclicked before and clicked afterwards", "state of the gmail shortcut was unclicked before and clicked afterwards", "state of the gmail shortcut was unclicked before and clicked afterwards", "state of the gmail shortcut was unclicked before and clicked afterwards", "state of the gmail shortcut was unclicked before and clicked afterwards", "state of the gmail shortcut was unclicked before and clicked afterwards", "state of the gmail shortcut was unclicked before and clicked afterwards"]}
{"id": "Create a gmail account|3", "answers": ["state of account was uncreated before and created afterwards", "step of \"create an account\" was unclicked before and clicked afterwards", "state of account was uncreated before and created afterwards", "step of \"create an account\" was unclicked before and clicked afterwards"]}
{"id": "Create a gmail account|4", "answers": ["state of account was uncreated before and created afterwards", "state of credentials was unentered before and entered afterwards", "step of next step was unclicked before and clicked afterwards", "step of credentials was unentered before and entered afterwards", "step of next step was unclicked before and clicked afterwards", "step of credentials was unentered before and entered afterwards", "step of credentials was unentered before and entered afterwards", "step of credentials was unentered before and entered afterwards", "step of credentials was unentered before and entered afterwards", "step of credentials was unentered before and entered afterwards", "step of credentials was unentered before and entered afterwards", "step of credentials was unentered before and entered afterwards", "step of credentials was unentered before and entered afterwards", "step of credentials was unentered before and entered afterwards", "step of credentials was unentered before and entered afterwards"]}
{"id": "Create a gmail account|5", "answers": ["state of account was uncustomized before and customized afterwards", "state of background was uncustomized before and customized afterwards", "state of email signature was uncustomized before and customized afterwards", "state of account was uncustomized before and customized afterwards", "state of background was uncustomized before and customized afterwards", "state of email signature was uncustomized before and customized afterwards"]}
{"id": "Create a gmail account|6", "answers": ["state of account was unregistered before and registered afterwards", "state of emails was unsent before and sent afterwards", "state of account was uncustomized before and customized afterwards", "state of emails was unsent before and sent afterwards", "state of account was uncustomized before and customized afterwards", "state of emails was unsent before and sent afterwards", "state of account was uncustomized before and customized afterwards"]}
{"id": "Wax a car|1", "answers": ["cleanness of car was dirty before and clean afterwards", "location of dirt was on car before and in trash afterwards", "location of grime was on car before and in trash afterwards", "cleanness of car was dirty before and clean afterwards", "location of dirt was on car before and in trash afterwards", "cleanness of car was dirty before and clean afterwards", "cleanness of car was dirty before and clean afterwards", "location of grime was on car before and in trash afterwards", "cleanness of car was dirty before and clean afterwards", "cleanness of car was dirty before and clean afterwards"]}
{"id": "Wax a car|2", "answers": ["location of car was in the driveway before and in a shady spot afterwards", "location of car was in the driveway before and in a shady spot afterwards", "location of car was in the sun before and in shade afterwards", "location of car was in sun before and shaded afterwards", "location of car was in sun before and in shade afterwards", "location of car was in sun before and in shade afterwards", "location of car was in sun before and in shade afterwards"]}
{"id": "Wax a car|3", "answers": ["location of wax was in the bottle before and on the car afterwards", "location of wax was in the bottle before and on the car afterwards", "state of car was dirty before and waxed afterwards", "location of wax was in the bottle before and on the car afterwards", "location of waxxing pad was in the drawer before and on the car afterwards", "location of wax was in the bottle before and on the car afterwards", "location of wax was in the bottle before and on the car afterwards", "location of wax was in the bottle before and on the car afterwards", "location of wax was in the bottle before and on the car afterwards", "location of wax was in the bottle before and on the car afterwards", "location of wax was in the bottle before and on the car afterwards", "location of wax was in the bottle before and on the car afterwards", "location of wax was in the bottle before and on the car afterwards"]}
{"id": "Wax a car|4", "answers": ["location of wax was in bottle before and on pad afterwards", "location of wax was in bottle before and on car afterwards", "state of wax was liquid before and solid afterwards", "location of wax was in bottle before and on car afterwards", "location of wax was in bottle before and on car afterwards", "location of wax was in bottle before and on car afterwards", "state of wax was liquid before and solid afterwards", "location of wax was in bottle before and on pad afterwards", "state of wax was liquid before and solid afterwards", "location of wax was in bottle before and on car afterwards", "location of waxxing pad was in the car before and in the hand afterwards", "location of wax was in bottle before and on car afterwards", "location of wax was in bottle before and on car afterwards", "location of wax was in bottle before and on car afterwards"]}
{"id": "Wax a car|5", "answers": ["texture of wax was smooth before and sticky afterwards", "state of car was bare before and waxed afterwards", "location of wax was in container before and on car afterwards", "location of wax was in the container before and on the car afterwards", "location of wax was in the container before and on the car afterwards", "texture of paint was smooth before and sticky afterwards", "location of wax was in the container before and on the car afterwards", "texture of paint was smooth before and sticky afterwards", "location of wax was in the container before and on the car afterwards", "location of wax was in the container before and on the car afterwards", "texture of car paint was smooth before and sticky afterwards", "location of wax was in the container before and on the car afterwards", "state of car was bare before and waxed afterwards"]}
{"id": "Wax a car|6", "answers": ["texture of wax was smooth before and sticky afterwards", "state of wax was on car before and removed afterwards", "location of wax was on car before and on table afterwards", "state of car was dirty before and clean afterwards", "location of wax was on car before and on table afterwards", "state of wax was on car before and removed afterwards", "texture of car was dry before and wet afterwards", "texture of wax was smooth before and sticky afterwards", "state of wax was on car before and removed afterwards", "texture of paint was smooth before and sticky afterwards"]}
{"id": "Wax a car|7", "answers": ["texture of cloth was dry before and sticky afterwards", "location of wax was on car before and on cloth afterwards", "cleanness of cloth was clean before and dirty afterwards", "location of wax was on car before and on cloth afterwards", "state of wax was on car before and removed afterwards", "location of excess wax was on car before and on cloth afterwards", "state of wax was on car before and removed afterwards", "location of excess wax was on car before and on cloth afterwards", "cleanness of cloth was clean before and dirty afterwards", "location of excess wax was on cloth before and on car afterwards", "state of wax was on cloth before and wiped away afterwards", "location of excess wax was on cloth before and on car afterwards", "state of wax was on cloth before and clean afterwards"]}
{"id": "Wax a car|8", "answers": ["state of paint was uncoated before and coated afterwards", "state of paint was bare before and coated afterwards", "state of car was vulnerable before and protected afterwards", "state of paint was on car before and removed afterwards", "state of wax was on car before and removed afterwards", "state of paint was uncoated before and coated afterwards", "state of wax was on car before and removed afterwards", "state of paint was uncoated before and coated afterwards"]}
{"id": "Stay at Airbnb|1", "answers": ["location of person was at home before and at airbnb afterwards", "state of airbnb was unselected before and selected afterwards", "state of airbnb was unselected before and selected afterwards", "state of app was closed before and open afterwards", "state of airbnb was unselected before and selected afterwards"]}
{"id": "Stay at Airbnb|2", "answers": ["state of reservation was unmade before and made afterwards", "state of reservation was unmade before and made afterwards", "state of reservation was unmade before and made afterwards", "state of reservation was unmade before and made afterwards", "state of reservation was unmade before and made afterwards", "state of reservation was unmade before and made afterwards"]}
{"id": "Stay at Airbnb|3", "answers": ["location of person was at airport before and at airbnb afterwards", "location of person was at home before and at airbnb afterwards", "state of airbnb was unbooked before and booked afterwards", "state of reservation was unmade before and made afterwards", "state of airbnb was unbooked before and booked afterwards", "location of person was at home before and at airbnb afterwards"]}
{"id": "Stay at Airbnb|4", "answers": ["state of person was checking in before and checking out afterwards", "state of person was checking in before and checking out afterwards", "state of person was checking in before and checking out afterwards", "state of person was checking in before and checking out afterwards", "state of person was unpacking before and unpacking afterwards", "state of person was unpacking before and unpacking afterwards", "state of person was unpacking before and unpacking afterwards"]}
{"id": "Stay at Airbnb|5", "answers": ["location of belongings was in the closet before and in the room afterwards", "state of belongings was packed before and unpacked afterwards", "state of belongings was packed before and unpacked afterwards", "location of belongings was in the suitcase before and in the room afterwards", "state of belongings was packed before and unpacked afterwards", "state of belongings was packed before and unpacked afterwards", "state of belongings was packed before and unpacked afterwards", "state of belongings was packed before and unpacked afterwards"]}
{"id": "Stay at Airbnb|6", "answers": ["state of you was in need of relaxation before and now in need of entertainment afterwards"]}
{"id": "Stay at Airbnb|7", "answers": ["state of the door was closed before and open afterwards", "state of belongings was unpacked before and unpacked afterwards", "state of the door was closed before and open afterwards", "state of the door was unpacked before and unpacked afterwards", "state of belongings was unpacked before and unpacked afterwards", "state of the door was closed before and open afterwards", "state of the room was unpacked before and unpacked afterwards", "state of belongings was unpacked before and unpacked afterwards", "state of the room was unpacked before and unpacked afterwards"]}
{"id": "Use an oil diffuser|1", "answers": ["state of oil diffuser was closed before and open afterwards", "location of oil diffuser lid was closed before and open afterwards", "state of oil diffuser was closed before and open afterwards", "location of oil diffuser lid was closed before and open afterwards", "state of oil diffuser was closed before and open afterwards"]}
{"id": "Use an oil diffuser|2", "answers": ["location of oil was in bottle before and in diffuser afterwards", "location of oil was in bottle before and in diffuser afterwards", "location of oil was in bottle before and in diffuser afterwards", "location of oil was in bottle before and in diffuser afterwards"]}
{"id": "Use an oil diffuser|3", "answers": ["location of oil was in bottle before and in diffuser afterwards", "weight of the oil bottle was heavier before and lighter afterwards", "volume of the diffuser was less full before and fuller afterwards", "location of oil was in bottle before and in diffuser afterwards", "weight of the oil bottle was heavier before and lighter afterwards", "volume of the diffuser was less full before and fuller afterwards", "location of oil was in bottle before and in diffuser afterwards", "weight of the diffuser was lighter before and heavier afterwards", "volume of the diffuser was less full before and fuller afterwards", "weight of the oil bottle was heavier before and lighter afterwards", "volume of the diffuser was less full before and fuller afterwards"]}
{"id": "Use an oil diffuser|4", "answers": ["location of water was in the bottle before and in the diffuser afterwards", "volume of the bottle was fuller before and emptier afterwards", "weight of the bottle was heavier before and lighter afterwards", "weight of the diffuser was lighter before and heavier afterwards", "weight of the bottle was heavier before and lighter afterwards", "weight of the bottle was heavier before and lighter afterwards", "weight of the bottle was heavier before and lighter afterwards", "weight of the bottle was heavier before and lighter afterwards", "location of water was in the bottle before and in the diffuser afterwards", "volume of the bottle was fuller before and emptier afterwards", "weight of the bottle was heavier before and lighter afterwards", "volume of the bottle was fuller before and emptier afterwards", "location of water was in the bottle before and in the diffuser afterwards", "location of water was in the bottle before and in the diffuser afterwards", "volume of the bottle was fuller before and emptier afterwards"]}
{"id": "Use an oil diffuser|5", "answers": ["state of lid was open before and closed afterwards", "location of water was in the diffuser before and in the water afterwards", "state of lid was open before and closed afterwards", "location of water was in the container before and in the diffuser afterwards", "state of lid was open before and closed afterwards", "state of lid was open before and closed afterwards", "location of lid was open before and closed afterwards"]}
{"id": "Use an oil diffuser|6", "answers": ["state of diffuser was off before and on afterwards", "power of diffuser was off before and on afterwards", "location of oil was in the diffuser before and in the water afterwards", "state of lid was open before and closed afterwards", "location of water was in the bottle before and in the diffuser afterwards", "state of diffuser was off before and on afterwards", "state of diffuser was off before and on afterwards", "location of water was in the bottle before and in the diffuser afterwards", "state of diffuser was off before and on afterwards", "state of water was still before and moving afterwards"]}
{"id": "Use an oil diffuser|7", "answers": ["state of diffuser was off before and on afterwards", "power of diffuser was off before and on afterwards", "state of timer was off before and on afterwards", "state of diffuser was off before and on afterwards", "state of diffuser was off before and on afterwards", "state of diffuser was off before and on afterwards", "state of diffuser was off before and running afterwards"]}
{"id": "Take a shower|1", "answers": ["state of the shower was off before and on afterwards", "power of power was off before and on afterwards", "state of shower was off before and on afterwards", "temperature of water was cold before and warm afterwards", "temperature of water was cold before and warm afterwards", "temperature of water was cold before and warm afterwards", "temperature of water was cold before and warm afterwards", "temperature of water was cold before and hot afterwards", "temperature of water was cold before and warm afterwards", "temperature of water was cold before and hot afterwards", "temperature of water was cold before and warm afterwards", "temperature of water was cold before and hot afterwards", "temperature of water was cold before and warm afterwards"]}
{"id": "Take a shower|2", "answers": ["state of person was undressed before and undressed afterwards", "location of clothes was on before and in the hamper afterwards", "location of person was in the shower before and out of the shower afterwards", "state of person was clothed before and naked afterwards", "location of clothes was on before and in the hamper afterwards", "location of person was in the shower before and out of the shower afterwards", "location of clothes was on before and in the hamper afterwards", "state of person was clothed before and naked afterwards", "state of person was clothed before and naked afterwards", "location of clothes was on before and in the hamper afterwards", "location of person was in the shower before and out of the shower afterwards", "location of person was in the shower before and out of the shower afterwards"]}
{"id": "Take a shower|3", "answers": ["state of water temperature was unadjusted before and adjusted afterwards", "temperature of water was cold before and warm afterwards", "temperature of water was cold before and warm afterwards", "temperature of water was cold before and warm afterwards", "temperature of water was cold before and warm afterwards", "temperature of water was cold before and warm afterwards", "temperature of water was cold before and warm afterwards", "temperature of water was cold before and warm afterwards", "temperature of water was cold before and warm afterwards", "temperature of water was cold before and warm afterwards"]}
{"id": "Take a shower|4", "answers": ["state of door was closed before and open afterwards", "state of door was closed before and open afterwards", "location of you was outside the shower before and inside the shower afterwards", "state of door was closed before and open afterwards", "location of person was outside the shower before and inside the shower afterwards", "location of you was outside the shower before and inside the shower afterwards"]}
{"id": "Take a shower|5", "answers": ["cleanness of hands was soapy before and clean afterwards", "state of you was needing soap before and soap free afterwards", "cleanness of hands was soapy before and clean afterwards", "moisture of hands was dry before and wet afterwards", "location of soap was in the bottle before and on the skin afterwards", "cleanness of hands was soapy before and clean afterwards", "moisture of hands was dry before and wet afterwards", "cleanness of hands was soapy before and clean afterwards", "cleanness of hands was dirty before and clean afterwards", "cleanness of hands was soapy before and clean afterwards", "cleanness of hands was soapy before and clean afterwards"]}
{"id": "Take a shower|6", "answers": ["location of shampoo was in bottle before and in shower afterwards", "state of hair was dry before and wet afterwards", "cleanness of hair was dirty before and clean afterwards", "state of hair was untrimmed before and trimmed afterwards", "cleanness of hair was dirty before and clean afterwards", "state of hair was untrimmed before and trimmed afterwards", "cleanness of hair was dirty before and clean afterwards", "location of shampoo was in bottle before and in shower afterwards", "state of hair was untrimmed before and trimmed afterwards", "cleanness of hair was dirty before and clean afterwards", "location of conditioner was in bottle before and in shower afterwards", "location of conditioner was in bottle before and in hair afterwards", "location of shampoo was in bottle before and in shower afterwards", "location of conditioner was in bottle before and in hair afterwards", "location of conditioner was in bottle before and in shower afterwards"]}
{"id": "Take a shower|7", "answers": ["location of water was in the pipes before and in the drain afterwards", "state of hair was wet before and rinsed afterwards", "location of soap was in the bottle before and in the drain afterwards", "state of hair was wet before and rinsed afterwards", "location of water was in the pipes before and in the drain afterwards", "location of soap was in the bottle before and in the drain afterwards", "state of hair was wet before and rinsed afterwards", "location of water was in the pipes before and in the drain afterwards", "location of water was in shower before and rinsed off afterwards", "location of soap was in bottle before and in drain afterwards", "location of water was in shower before and rinsed off afterwards", "location of shampoo was in bottle before and in drain afterwards", "location of conditioner was in bottle before and in drain afterwards", "location of water was in the shower before and in the drain afterwards", "location of shampoo was in bottle before and rinsed off afterwards", "location of conditioner was in bottle before and rinsed off afterwards", "location of water was in the shower before and in the drain afterwards"]}
{"id": "Take a shower|8", "answers": ["state of shower was on before and off afterwards", "power of shower was on before and off afterwards", "temperature of water was warm before and cold afterwards", "temperature of water was warm before and cold afterwards", "temperature of water was warm before and cold afterwards", "temperature of shower was hot before and cold afterwards", "temperature of water was warm before and cold afterwards", "temperature of water was warm before and cold afterwards", "temperature of water was warm before and cold afterwards", "temperature of water was warm before and cold afterwards"]}
{"id": "Take a shower|9", "answers": ["state of you was in the shower before and out of the shower afterwards", "location of you was in the shower before and outside the shower afterwards"]}
{"id": "Hit a tennis ball with a tennis racquet|1", "answers": ["location of ball was on ground before and in air afterwards", "location of ball was in hand before and in air afterwards", "state of you was waiting for the ball before and now throwing the ball afterwards", "location of ball was in hand before and in air afterwards", "state of ball was unthrown before and thrown afterwards", "location of ball was in hand before and in air afterwards"]}
{"id": "Hit a tennis ball with a tennis racquet|2", "answers": ["location of ball was in hand before and in air afterwards", "state of you was waiting for the ball to bounce before and now throwing the ball afterwards", "state of you was waiting for the ball to bounce before and now throwing the ball afterwards", "speed of ball was still before and bouncing afterwards", "state of you was waiting for the ball to bounce before and now throwing the ball afterwards", "speed of ball was still before and bouncing afterwards", "location of ball was in hand before and in air afterwards"]}
{"id": "Hit a tennis ball with a tennis racquet|3", "answers": ["position of body was down before and up afterwards", "position of body was unprepared before and positioned afterwards", "position of body was unprepared before and positioned afterwards", "position of body was unprepared before and positioned afterwards", "position of body was unprepared before and positioned afterwards"]}
{"id": "Hit a tennis ball with a tennis racquet|4", "answers": ["location of ball was in air before and in waist level afterwards", "speed of ball was moving fast before and slowing down afterwards", "state of ball was bouncing before and coming back up afterwards", "speed of ball was moving before and slowing down afterwards", "location of ball was in air before and at waist level afterwards", "speed of ball was moving before and slowing down afterwards", "location of ball was in air before and at waist level afterwards"]}
{"id": "Hit a tennis ball with a tennis racquet|5", "answers": ["location of ball was in air before and in hands afterwards", "speed of ball was moving before and still afterwards", "speed of arm was moving before and still afterwards", "location of ball was in air before and in hands afterwards", "speed of ball was moving before and still afterwards", "location of ball was in air before and in hands afterwards", "speed of ball was moving before and still afterwards", "location of ball was in air before and in hands afterwards", "location of ball was in air before and in hands afterwards", "location of ball was in air before and in hands afterwards", "location of ball was in air before and in hands afterwards"]}
{"id": "Hit a tennis ball with a tennis racquet|6", "answers": ["position of racquet was behind other shoulder before and behind head afterwards", "state of shoulder was down before and up afterwards", "location of racquet was in hand before and behind shoulder afterwards", "location of racquet was in hand before and behind shoulder afterwards", "location of racquet was in hand before and behind shoulder afterwards"]}
{"id": "Throw a frisbee|1", "answers": ["location of frisbee was in the grass before and in the hand afterwards", "location of frisbee was on the ground before and in the hand afterwards", "location of frisbee was in the grass before and in the hand afterwards", "location of frisbee was in the grass before and in the hand afterwards", "location of frisbee was in the grass before and in the hand afterwards", "location of frisbee was in the air before and in the hand afterwards", "location of frisbee was in the grass before and in the hand afterwards"]}
{"id": "Throw a frisbee|2", "answers": ["location of frisbee was in hand before and in the air afterwards", "state of hand was empty before and holding the frisbee afterwards", "location of frisbee was in hand before and in air afterwards", "state of hand was empty before and holding the frisbee afterwards", "location of frisbee was in hand before and in air afterwards", "state of hand was empty before and holding the frisbee afterwards", "location of frisbee was in hand before and in air afterwards"]}
{"id": "Throw a frisbee|3", "answers": ["orientation of frisbee was held by hand before and held by elbow afterwards", "location of frisbee was in hand before and in wind afterwards", "state of frisbee was held before and winded afterwards", "location of frisbee was in hand before and in air afterwards", "state of frisbee was loose before and wound up afterwards", "state of frisbee was unwinded before and wound up afterwards", "state of frisbee was unwound before and wound up afterwards", "location of frisbee was in hand before and in air afterwards"]}
{"id": "Throw a frisbee|4", "answers": ["orientation of arm was straight before and stretched out afterwards", "state of arm was straight before and bent afterwards", "location of arm was in air before and in chest afterwards", "location of frisbee was in hand before and in chest afterwards", "state of arm was straight before and stretched afterwards"]}
{"id": "Throw a frisbee|5", "answers": ["location of frisbee was in hand before and in air afterwards", "location of frisbee was in hand before and in air afterwards", "location of frisbee was in hand before and in air afterwards", "location of frisbee was in hand before and in air afterwards", "location of frisbee was in hand before and in air afterwards"]}
{"id": "Throw a frisbee|6", "answers": ["speed of momentum was low before and maintained afterwards", "speed of frisbee was moving before and moving faster afterwards", "speed of arm was moving before and still afterwards", "location of frisbee was in hand before and in air afterwards", "location of frisbee was in hand before and released afterwards"]}
{"id": "Snowboarding down a skii slope|1", "answers": ["location of person was on skii lift before and off skii lift afterwards", "location of person was on skii lift before and off skii lift afterwards", "location of person was on lift before and off lift afterwards", "location of person was on lift before and off lift afterwards", "location of person was on lift before and off lift afterwards", "location of person was on lift before and off lift afterwards"]}
{"id": "Snowboarding down a skii slope|2", "answers": ["location of snowboard was on ground before and on skiis afterwards", "location of snowboard was off skiis before and on skiis afterwards", "location of snowboard was on ground before and secured to shoes afterwards", "location of snowboard was loose before and secured afterwards", "location of snowboard was on ground before and secured to shoes afterwards", "location of snowboard was loose before and secured afterwards", "location of skiis was off before and on afterwards", "location of skiis was off before and on afterwards", "location of skiis was off before and on afterwards", "location of snowboard was loose before and secured afterwards", "location of skiis was off before and on afterwards", "location of snowboard was loose before and secured afterwards", "location of skiis was off before and on afterwards", "location of snowboard was loose before and secured afterwards", "location of skiis was off before and on afterwards"]}
{"id": "Snowboarding down a skii slope|3", "answers": ["movement of body was standing before and moving afterwards", "location of body was on the slope before and on the snowboard afterwards", "location of snowboard was on ground before and in air afterwards", "location of body was on the slope before and off the slope afterwards", "location of snowboard was on ground before and in air afterwards", "location of body was on the slope before and off the slope afterwards", "location of snowboard was on ground before and in air afterwards", "orientation of body was standing on slope before and moving down slope afterwards", "orientation of snowboard was on ground before and in air afterwards"]}
{"id": "Snowboarding down a skii slope|4", "answers": ["movement of legs was standing before and moving afterwards", "location of legs was on the ski lift before and on the snowboard afterwards", "orientation of legs was straight before and bent afterwards", "location of ski lift was above you before and below you afterwards", "location of body was on the ski lift before and on the snowboard afterwards", "orientation of legs was straight before and bent afterwards", "location of body was on the ski lift before and on the snowboard afterwards", "location of body was on the ski lift before and on the snowboard afterwards", "orientation of body was standing before and moving afterwards"]}
{"id": "Snowboarding down a skii slope|5", "answers": ["movement of body was moving up the slope before and moving down the slope afterwards", "location of you was on the snowboard before and sliding down the slope afterwards", "location of you was on the snow before and sliding down the slope afterwards", "location of you was on the snow before and on the ground afterwards", "location of you was on the snowboard before and on the ground afterwards", "location of you was on the snow before and on the ground afterwards", "location of snowboard was on the ground before and on the person's feet afterwards", "location of person was on snowboard before and on ground afterwards", "location of person was on snowboard before and on ground afterwards", "location of person was on snowboard before and on ground afterwards"]}
{"id": "Snowboarding down a skii slope|6", "answers": ["movement of legs was stationary before and moving afterwards", "location of legs was at the sides before and in front afterwards", "location of body was on snowboard before and on ground afterwards", "location of legs was on the ski lift before and on the ground afterwards", "location of legs was on the ski lift before and on the ground afterwards", "location of legs was on the ski lift before and on the ground afterwards", "location of legs was on the ski lift before and on the ground afterwards", "location of legs was on the ski lift before and on the ground afterwards", "location of body was on the ski lift before and on the ground afterwards", "location of body was on the ski lift before and on the ground afterwards"]}
{"id": "Shoot an arrow|1", "answers": ["location of hand was on the bow before and on the bow afterwards", "location of hand was on the bow before and on the hand afterwards", "state of hand was loose before and held afterwards", "location of hand was on the bow before and on the hand afterwards", "location of hand was on the bow before and on the hand afterwards", "location of hand was on the bow before and on the hand afterwards", "location of hand was on the bow before and on the hand afterwards", "location of hand was on the bow before and on the hand afterwards"]}
{"id": "Shoot an arrow|2", "answers": ["location of arrow was in the quiver before and in the hand afterwards", "state of hand was empty before and holding the arrow afterwards", "location of arrow was in the quiver before and in the hand afterwards", "location of arrow was in the air before and in the hand afterwards", "location of arrow was in the air before and in the hand afterwards", "location of arrow was in the air before and in the hand afterwards", "location of arrow was in the air before and in the hand afterwards", "location of arrow was in the air before and in the hand afterwards", "location of arrow was in the air before and in the hand afterwards"]}
{"id": "Shoot an arrow|3", "answers": ["location of arrow was on ground before and on bow afterwards", "state of hand was empty before and holding bow afterwards", "location of arrow was loose before and on the bow afterwards", "location of arrow was in hand before and on bow afterwards", "location of arrow was loose before and on bow afterwards", "location of arrow was in hand before and on bow afterwards", "location of arrow was in hand before and on bow afterwards", "location of arrow was in hand before and on bow afterwards"]}
{"id": "Shoot an arrow|4", "answers": ["location of arrow was on the ground before and on the bow afterwards", "state of string was loose before and tight afterwards", "state of string was loose before and tight afterwards", "state of string was loose before and pulled afterwards", "location of arrow was on the ground before and on the bow afterwards", "state of string was loose before and pulled afterwards", "state of string was loose before and pulled afterwards", "state of bow was loose before and pulled afterwards", "location of arrow was on the ground before and on the string afterwards", "state of string was loose before and pulled afterwards"]}
{"id": "Shoot an arrow|5", "answers": ["location of arrow was on the bow before and in the air afterwards", "state of eyes was unfocused before and focused afterwards", "focus of you was aiming before and now aiming afterwards", "location of arrow was in hand before and in air afterwards"]}
{"id": "Shoot an arrow|6", "answers": ["location of string was on the bow before and off the bow afterwards", "location of hand was on the string before and off the string afterwards", "state of string was held before and let go afterwards", "location of hand was on the string before and off the string afterwards", "location of arrow was on the bow before and in the air afterwards", "state of string was tight before and loose afterwards", "location of hand was on the string before and off the string afterwards", "location of arrow was on the string before and in the air afterwards", "state of string was tight before and loose afterwards"]}
{"id": "Shoot an arrow|7", "answers": ["location of bow was up before and down afterwards", "position of bow was up before and down afterwards", "position of hand was holding bow before and holding nothing afterwards", "position of arrow was up before and down afterwards", "position of hand was holding nothing before and holding bow afterwards"]}
{"id": "Taking an at-home COVID test|1", "answers": ["location of packaging was closed before and open afterwards", "state of packaging was closed before and open afterwards", "state of packaging was closed before and open afterwards", "location of packaging was closed before and open afterwards", "location of packaging was closed before and open afterwards", "location of packaging was closed before and open afterwards"]}
{"id": "Taking an at-home COVID test|2", "answers": ["location of swab was in packaging before and removed afterwards", "location of swab was in package before and in hand afterwards", "location of swab was in package before and removed afterwards", "location of nasal swab was in package before and removed afterwards", "location of swab was in package before and removed afterwards", "location of swab was in package before and removed afterwards", "location of swab was in package before and removed afterwards", "location of swab was in package before and removed afterwards", "location of swab was in package before and removed afterwards"]}
{"id": "Taking an at-home COVID test|3", "answers": ["location of swab was outside of nose before and inside nose afterwards", "location of swab was outside of nose before and inside nose afterwards", "location of swab was outside of nose before and inside nose afterwards", "location of swab was in package before and inserted into nose afterwards", "location of swab was in package before and out of package afterwards", "location of swab was in package before and out of package afterwards", "location of swab was in package before and out of package afterwards", "location of swab was in package before and out of package afterwards", "location of swab was in package before and removed from package afterwards", "location of swab was in package before and removed from package afterwards", "location of swab was in package before and removed from package afterwards"]}
{"id": "Taking an at-home COVID test|4", "answers": ["location of swab was in hand before and in nostril afterwards", "orientation of swab was straight before and twisted afterwards", "location of swab was in hand before and in nostril afterwards", "location of swab was in hand before and in nostril afterwards", "location of swab was in hand before and in nostril afterwards", "orientation of swab was straight before and twisted afterwards"]}
{"id": "Taking an at-home COVID test|5", "answers": ["location of swab was in hand before and in container afterwards", "location of swab was in hand before and in container afterwards", "location of swab was in hand before and in container afterwards", "location of swab was in hand before and in container afterwards", "location of swab was in hand before and in container afterwards", "location of swab was in hand before and in container afterwards", "location of swab was in hand before and in container afterwards", "location of swab was in hand before and in container afterwards", "location of swab was in hand before and in container afterwards"]}
{"id": "Taking an at-home COVID test|6", "answers": ["location of swab was in the container before and in the trash afterwards", "location of swab was in hand before and in trash afterwards", "location of swab was in hand before and in trash afterwards", "location of swab was in hand before and in trash afterwards", "location of swab was in hand before and in trash afterwards", "location of swab was in hand before and in trash afterwards", "location of swab was in hand before and in trash afterwards", "location of swab was in hand before and in trash afterwards"]}
{"id": "Taking an at-home COVID test|7", "answers": ["location of swab was in the container before and in the mix afterwards", "location of swab was in container before and in liquid afterwards", "location of container was on the counter before and on the table afterwards", "location of swab was in the container before and in the liquid container afterwards", "location of swab was in container before and in liquid container afterwards", "location of container was on the counter before and in the hand afterwards", "location of swab was in the container before and in the liquid container afterwards", "location of container was on the counter before and in the hand afterwards", "location of swab was in the container before and in the liquid container afterwards", "location of swab was in the container before and in the liquid container afterwards"]}
{"id": "Taking an at-home COVID test|8", "answers": ["location of liquid was outside of container before and inside container afterwards", "location of liquid was outside of container before and inside container afterwards", "location of liquid was outside of container before and inside container afterwards", "volume of container was empty before and full afterwards", "weight of container was lighter before and heavier afterwards", "volume of container was empty before and full afterwards", "location of liquid was in bottle before and in container afterwards", "weight of container was lighter before and heavier afterwards", "volume of bottle was full before and empty afterwards", "location of liquid was in bottle before and in container afterwards", "weight of container was lighter before and heavier afterwards", "volume of bottle was full before and empty afterwards"]}
{"id": "Taking an at-home COVID test|9", "answers": ["location of liquid was in container before and in mouth afterwards", "location of container was on the counter before and on the table afterwards", "location of liquid was in container before and in mouth afterwards", "location of liquid was in container before and in mouth afterwards", "moisture of device was dry before and wet afterwards", "moisture of device was dry before and wet afterwards", "moisture of device was dry before and wet afterwards", "moisture of device was dry before and wet afterwards", "moisture of device was dry before and wet afterwards", "moisture of device was dry before and wet afterwards", "moisture of device was dry before and wet afterwards", "moisture of device was dry before and wet afterwards", "moisture of device was dry before and wet afterwards"]}
{"id": "Taking an at-home COVID test|10", "answers": ["state of person was reading before and done reading afterwards", "state of results was unread before and read afterwards", "state of results was unread before and read afterwards"]}
{"id": "Wash hands with soap|1", "answers": ["location of water was in faucet before and in sink afterwards", "wetness of hands was dry before and wet afterwards", "wetness of hands was dry before and wet afterwards", "location of water was in faucet before and in sink afterwards", "wetness of hands was dry before and wet afterwards", "moisture of hands was dry before and wet afterwards", "location of water was in faucet before and in sink afterwards", "wetness of hands was dry before and wet afterwards", "wetness of sink was dry before and wet afterwards", "location of water was in faucet before and in sink afterwards", "wetness of hands was dry before and wet afterwards", "wetness of hands was dry before and wet afterwards"]}
{"id": "Wash hands with soap|2", "answers": ["location of soap was in bottle before and in sink afterwards", "location of pump was in the drawer before and in the hand afterwards", "location of soap was in bottle before and in sink afterwards", "location of pump was in drawer before and in hand afterwards", "location of soap was in bottle before and in sink afterwards", "location of soap was in bottle before and in sink afterwards", "location of pump was in drawer before and in hand afterwards", "location of soap was in bottle before and in sink afterwards", "location of soap was in bottle before and in sink afterwards", "location of soap was in bottle before and in sink afterwards", "location of soap was in bottle before and in sink afterwards"]}
{"id": "Wash hands with soap|3", "answers": ["location of soap was in bottle before and in mixing bowl afterwards", "state of hands was dry before and wet afterwards", "composition of soap was separate before and mixed afterwards", "location of soap was in bottle before and in mixing bowl afterwards", "location of soap was in bottle before and in mixing bowl afterwards", "location of soap was in bottle before and in mixing bowl afterwards", "location of soap was in bottle before and in mixing bowl afterwards", "location of soap was in bottle before and in mixing bowl afterwards", "location of soap was in bottle before and in mixing bowl afterwards", "location of soap was in bottle before and in mixing bowl afterwards"]}
{"id": "Wash hands with soap|4", "answers": ["location of soap was in hand before and in water afterwards", "state of hands was dirty before and clean afterwards", "cleanness of hands was dirty before and clean afterwards", "moisture of hands was dry before and wet afterwards", "cleanness of hands was dirty before and clean afterwards", "cleanness of hands was dirty before and clean afterwards", "location of water was in faucet before and in sink afterwards", "cleanness of hands was dirty before and clean afterwards", "cleanness of hands was dirty before and clean afterwards", "cleanness of hands was dirty before and clean afterwards", "wetness of hands was dry before and wet afterwards", "cleanness of hands was dirty before and clean afterwards"]}
{"id": "Wash hands with soap|5", "answers": ["location of towel was in the drawer before and on the hands afterwards", "wetness of hands was wet before and dry afterwards", "location of towel was in the drawer before and on the hands afterwards", "wetness of hands was wet before and dry afterwards", "location of towel was in the drawer before and on the hands afterwards", "wetness of hands was wet before and dry afterwards", "location of towel was in the drawer before and on the hands afterwards", "location of soap was in the hands before and in the sink afterwards", "wetness of hands was wet before and dry afterwards", "cleanness of hands was dirty before and clean afterwards", "location of soap was in the sink before and in the drain afterwards", "wetness of hands was wet before and dry afterwards", "cleanness of hands was dirty before and clean afterwards", "location of soap was in the hands before and in the drain afterwards", "cleanness of hands was dirty before and clean afterwards"]}
{"id": "Making boba milk tea|1", "answers": ["state of water was still before and boiling afterwards", "temperature of water was cool before and hot afterwards", "temperature of water was cold before and hot afterwards", "temperature of water was cold before and hot afterwards", "temperature of water was cold before and hot afterwards", "temperature of water was cold before and hot afterwards", "temperature of water was cold before and hot afterwards", "temperature of water was cold before and hot afterwards", "temperature of water was cold before and boiling afterwards", "temperature of water was cool before and hot afterwards", "temperature of water was cold before and hot afterwards", "temperature of water was cold before and boiling afterwards", "temperature of water was cool before and hot afterwards"]}
{"id": "Making boba milk tea|2", "answers": ["location of boba powder packet was in the package before and in the bowl afterwards", "location of water was in the tap before and in the bowl afterwards", "location of boba powder packet was in the package before and in the bowl afterwards", "location of water was in the tap before and in the bowl afterwards", "location of boba powder was in a package before and in a bowl afterwards", "location of boba powder was in a package before and in a bowl afterwards", "location of water was in the tap before and in the bowl afterwards", "location of boba powder was in a package before and in a bowl afterwards", "location of boba powder was in a package before and in a bowl afterwards", "volume of bowl was empty before and full afterwards", "weight of bowl was light before and heavy afterwards", "location of boba powder was in a package before and in a bowl afterwards", "location of boba powder was in a package before and in a bowl afterwards", "location of water was in the tap before and in the bowl afterwards", "location of boba powder was in a package before and in a bowl afterwards", "location of boba powder was in a package before and in a bowl afterwards"]}
{"id": "Making boba milk tea|3", "answers": ["temperature of tapioca balls was cold before and hot afterwards", "state of tapioca balls was raw before and cooked afterwards", "temperature of tapioca balls was cold before and hot afterwards", "temperature of tapioca balls was cold before and hot afterwards", "temperature of tapioca balls was cold before and hot afterwards", "temperature of tapioca was cold before and hot afterwards", "temperature of tapioca was cold before and hot afterwards", "temperature of tapioca was cold before and hot afterwards", "temperature of tapioca was cold before and hot afterwards", "temperature of tapioca was cold before and hot afterwards", "temperature of tapioca was cold before and hot afterwards", "temperature of tapioca was cold before and hot afterwards", "temperature of tapioca was cold before and hot afterwards", "temperature of tapioca was cold before and hot afterwards", "temperature of tapioca was cold before and hot afterwards", "temperature of tapioca was cold before and hot afterwards", "temperature of tapioca was cold before and hot afterwards", "temperature of tapioca was cold before and hot afterwards"]}
{"id": "Making boba milk tea|4", "answers": ["temperature of tapioca balls was hot before and cool afterwards", "temperature of tapioca balls was hot before and cool afterwards", "temperature of tapioca balls was hot before and cool afterwards", "temperature of tapioca balls was hot before and cool afterwards", "temperature of tapioca balls was hot before and cool afterwards", "temperature of tapioca balls was hot before and cool afterwards", "temperature of tapioca balls was hot before and cool afterwards", "temperature of tapioca balls was hot before and cool afterwards", "temperature of tapioca balls was hot before and cool afterwards", "temperature of tapioca balls was hot before and cool afterwards", "temperature of tapioca balls was hot before and cool afterwards", "temperature of tapioca balls was hot before and cool afterwards"]}
{"id": "Making boba milk tea|5", "answers": ["location of tapioca balls was in a bowl before and in a cup afterwards", "temperature of tapioca balls was hot before and cold afterwards", "temperature of tapioca balls was hot before and cold afterwards", "temperature of tapioca balls was hot before and cold afterwards", "temperature of ice was cold before and cold afterwards", "location of tapioca balls was on counter before and in cup afterwards", "temperature of tapioca balls was hot before and cold afterwards", "temperature of tapioca balls was hot before and cold afterwards", "temperature of tapioca balls was hot before and cold afterwards", "temperature of tapioca balls was hot before and cold afterwards", "temperature of tapioca balls was hot before and cold afterwards", "location of tapioca balls was in bowl before and in cup afterwards", "temperature of tapioca balls was hot before and cold afterwards", "temperature of tapioca balls was hot before and cold afterwards", "temperature of tapioca balls was hot before and cold afterwards", "temperature of tapioca balls was hot before and cold afterwards"]}
{"id": "Making boba milk tea|6", "answers": ["location of boba drink was in a cup before and in a person's mouth afterwards", "location of cup was in the cupboard before and on the table afterwards", "location of boba drink was in the cup before and in the mouth afterwards", "location of cup was in the cupboard before and on the table afterwards", "location of boba drink was in the bottle before and in the cup afterwards", "location of boba drink was in bottle before and in cup afterwards", "location of boba drink was in bottle before and in cup afterwards", "location of boba drink was in bottle before and in cup afterwards", "location of boba drink was in bottle before and in cup afterwards", "location of boba drink was in bottle before and in cup afterwards", "location of boba drink was in bottle before and in cup afterwards", "location of boba drink was in bottle before and in cup afterwards"]}
{"id": "Making boba milk tea|7", "answers": ["location of spoon was in drawer before and in hand afterwards", "location of tapioca balls was in cup before and in hand afterwards", "location of boba drink was in cup before and in hand afterwards", "location of tapioca balls was in cup before and in hand afterwards", "location of ice was in freezer before and in cup afterwards", "location of boba drink was in cup before and in hand afterwards", "location of tapioca balls was in cup before and in hand afterwards", "location of boba drink was in cup before and in hand afterwards", "location of tapioca balls was in cup before and in hand afterwards", "location of boba drink was in cup before and in hand afterwards", "location of tapioca balls was in cup before and in hand afterwards", "location of boba drink was in cup before and in hand afterwards", "location of tapioca balls was in cup before and in hand afterwards", "location of boba drink was in cup before and in hand afterwards", "location of tapioca balls was in cup before and in hand afterwards", "location of boba drink was in cup before and in hand afterwards"]}
{"id": "Climbing a rock|1", "answers": ["location of hands was on the ground before and on the crevices afterwards", "location of hands was on the ground before and on the rock afterwards", "location of hands was on the ground before and on the rock afterwards", "location of hands was on the rock before and on the crevices afterwards", "location of hands was on the rock before and on the crevices afterwards", "location of hands was on the rock before and on the crevices afterwards", "location of hands was on the rock before and on the crevices afterwards", "location of hands was on the rock before and on the crevices afterwards"]}
{"id": "Climbing a rock|2", "answers": ["location of crevices was empty before and occupied by hands afterwards", "location of hands was on rock surface before and on crevices afterwards", "location of hands was on rock surface before and in crevices afterwards", "location of hands was on rock surface before and in crevices afterwards", "location of hands was on rock surface before and in crevices afterwards", "location of hands was on rock surface before and in crevices afterwards", "location of hands was on rock surface before and in crevices afterwards", "location of hands was on rock surface before and in crevices afterwards", "location of hands was on rock surface before and in crevices afterwards"]}
{"id": "Climbing a rock|3", "answers": ["location of feet was on the ground before and on the crevices afterwards", "location of feet was on the ground before and on the crevices afterwards", "location of feet was on the ground before and on the crevices afterwards", "location of feet was on the ground before and on the crevices afterwards", "location of feet was on the ground before and on the crevices afterwards", "location of feet was on the ground before and on the crevices afterwards", "location of feet was on the ground before and on the crevices afterwards", "location of feet was on the ground before and on the crevices afterwards", "orientation of hands was on rock before and away from rock afterwards"]}
{"id": "Climbing a rock|4", "answers": ["location of body was on ground before and in air afterwards", "position of body was flat before and raised afterwards", "location of body was on ground before and in air afterwards", "location of body was on ground before and in air afterwards", "location of body was on ground before and in air afterwards", "location of body was on ground before and in air afterwards"]}
{"id": "Climbing a rock|5", "answers": ["location of crevices was found before and found higher afterwards", "location of you was lower before and higher afterwards", "location of you was on ground before and above ground afterwards"]}
{"id": "Climbing a rock|6", "answers": ["location of person was on the ground before and on the top of the rock afterwards", "location of person was on the ground before and on the top of the rock afterwards", "location of person was on the ground before and on the rock afterwards", "location of person was on the ground before and on the rock afterwards", "location of person was on the ground before and on the rock afterwards", "location of person was on the ground before and on the rock afterwards", "location of person was on the ground before and on the rock afterwards"]}
{"id": "Changing a flat tire with a spare tire|1", "answers": ["location of spare tire was in the garage before and in the trunk afterwards", "location of spare tire was in garage before and in trunk afterwards", "location of spare tire was in garage before and in hand afterwards", "location of spare tire was in trunk before and removed afterwards", "location of spare tire was in garage before and in hand afterwards", "location of spare tire was in trunk before and removed afterwards", "location of spare tire was in garage before and in hand afterwards"]}
{"id": "Changing a flat tire with a spare tire|2", "answers": ["location of spare tire was in trunk before and on side afterwards", "location of spare tire was in trunk before and on the side afterwards", "location of spare tire was in the trunk before and on the side afterwards", "location of spare tire was in the trunk before and on the side afterwards", "location of spare tire was in the trunk before and on the side afterwards"]}
{"id": "Changing a flat tire with a spare tire|3", "answers": ["location of jack was in the toolbox before and on the ground afterwards", "location of car was on the ground before and lifted by the jack afterwards", "location of car was on the ground before and lifted by the jack afterwards", "location of car was on the ground before and lifted by the jack afterwards", "location of car was on the ground before and lifted by the jack afterwards", "location of car was on the ground before and lifted by the jack afterwards", "location of jack was in the toolbox before and on the ground afterwards", "location of jack was in the toolbox before and in the ground afterwards", "location of jack was in the toolbox before and in the hand afterwards", "location of jack was in the toolbox before and in the hand afterwards"]}
{"id": "Changing a flat tire with a spare tire|4", "answers": ["location of wrench was in toolbox before and on the ground afterwards", "location of wrench was in toolbox before and on the ground afterwards", "location of wrench was in toolbox before and on the ground afterwards", "location of flat tire bolts was unbolted before and unbolted afterwards", "location of wrench was in toolbox before and on the ground afterwards", "location of wrench was in toolbox before and on ground afterwards", "location of wrench was in toolbox before and on flat tire afterwards", "location of wrench was in toolbox before and on flat tire afterwards", "location of wrench was in toolbox before and on flat tire afterwards"]}
{"id": "Changing a flat tire with a spare tire|5", "answers": ["location of flat tire was on the car before and off the car afterwards", "location of flat tire was on the car before and off the car afterwards", "location of flat tire was on car before and removed afterwards", "location of flat tire was on car before and off car afterwards", "location of flat tire was on car before and off car afterwards", "location of flat tire was on car before and off car afterwards", "location of flat tire was on car before and off car afterwards", "location of flat tire was on car before and off car afterwards", "location of flat tire was on car before and off car afterwards", "location of flat tire was on car before and removed afterwards"]}
{"id": "Changing a flat tire with a spare tire|6", "answers": ["location of spare tire was off the axle before and on the axle afterwards", "location of spare tire was off the car before and on the car afterwards", "location of spare tire was off the car before and on the car afterwards", "location of spare tire was on the ground before and on the car afterwards", "location of spare tire was off the car before and on the car afterwards", "location of spare tire was on the ground before and on the car afterwards", "location of spare tire was off the car before and on the car afterwards", "location of spare tire was on the ground before and on the car afterwards", "location of spare tire was removed before and on the car afterwards", "location of spare tire was removed before and on the car afterwards", "location of spare tire was on the ground before and on the car afterwards"]}
{"id": "Changing a flat tire with a spare tire|7", "answers": ["location of spare tire was off the axle before and on the axle afterwards", "location of spare tire was off the axle before and on the axle afterwards", "location of spare tire was off the car before and on the car afterwards", "location of spare tire was off the car before and on the car afterwards", "location of spare tire was off the car before and on the car afterwards", "location of spare tire was off the car before and on the car afterwards", "location of spare tire was off the car before and on the car afterwards", "location of spare tire was off the car before and on the car afterwards", "location of spare tire was in trunk before and on car afterwards"]}
{"id": "Changing a flat tire with a spare tire|8", "answers": ["location of scissor was in the trunk before and on the ground afterwards", "location of jack was in the trunk before and in the hand afterwards", "location of jack was in the trunk before and released afterwards", "location of jack was on the car before and off the car afterwards", "location of scissor was in the trunk before and released afterwards", "location of jack was on the car before and released afterwards", "location of jack was on the car before and released afterwards", "location of jack was on the car before and released afterwards", "location of jack was on the car before and released afterwards", "location of jack was on the car before and released afterwards", "location of jack was on the car before and released afterwards", "location of jack was on the car before and released afterwards", "location of jack was on the car before and released afterwards"]}
{"id": "Make bread|1", "answers": ["location of flour was in the pantry before and on the counter afterwards", "location of warm water was in the faucet before and in a bowl afterwards", "location of salt was in the pantry before and on the counter afterwards", "location of flour was in the pantry before and on the counter afterwards", "location of yeast was in the package before and in the bowl afterwards", "location of warm water was in the tap before and in a bowl afterwards", "location of salt was in the pantry before and on the counter afterwards", "location of flour was in the pantry before and on the counter afterwards", "location of yeast was in the package before and in the bowl afterwards", "location of flour was in the pantry before and on the counter afterwards", "location of warm water was in the tap before and in a bowl afterwards", "location of salt was in the pantry before and on the counter afterwards", "location of flour was in the pantry before and on the counter afterwards", "location of yeast was in the package before and in the bowl afterwards", "location of warm water was in the tap before and in a bowl afterwards", "location of salt was in the pantry before and on the counter afterwards", "location of flour was in the pantry before and on the counter afterwards"]}
{"id": "Make bread|2", "answers": ["moisture of yeast was dry before and wet afterwards", "location of warm water was in a cup before and in a bowl afterwards", "location of yeast was in package before and in bowl afterwards", "location of warm water was in cup before and in bowl afterwards", "location of yeast was in package before and in bowl afterwards", "location of warm water was in cup before and in bowl afterwards", "location of yeast was in package before and in bowl afterwards", "location of water was in faucet before and in bowl afterwards", "location of salt was in package before and in bowl afterwards", "location of flour was in package before and in bowl afterwards", "location of flour was in package before and in bowl afterwards", "location of yeast was in package before and in bowl afterwards", "location of warm water was in cup before and in bowl afterwards", "location of flour was in package before and in bowl afterwards", "location of yeast was in package before and in bowl afterwards", "location of warm water was in cup before and in bowl afterwards", "location of salt was in package before and in bowl afterwards", "location of yeast was in package before and in bowl afterwards", "location of warm water was in faucet before and in bowl afterwards"]}
{"id": "Make bread|3", "answers": ["moisture of yeast was dry before and wet afterwards", "state of yeast was dormant before and active afterwards", "state of mixture was still before and foaming afterwards", "state of mixture was still before and bubbly afterwards", "volume of bowl was empty before and full afterwards", "state of mixture was still before and foaming afterwards", "volume of bowl was empty before and full afterwards", "state of mixture was still before and foaming afterwards"]}
{"id": "Make bread|4", "answers": ["location of flour was in bag before and in bowl afterwards", "location of salt was in bag before and in bowl afterwards", "location of flour was in bag before and in mixture afterwards", "location of salt was in bag before and in mixture afterwards", "location of flour was in bag before and in mixture afterwards", "location of flour was in bag before and in mixture afterwards", "location of salt was in bag before and in mixture afterwards", "location of flour was in bag before and in mixture afterwards", "location of flour was in the pantry before and in the bowl afterwards", "location of salt was in bag before and in mixture afterwards", "location of flour was in the pantry before and in the bowl afterwards", "location of flour was in the pantry before and in the mixture afterwards", "location of salt was in the pantry before and in the mixture afterwards", "location of flour was in the pantry before and in the mixture afterwards", "location of flour was in the pantry before and in the bowl afterwards"]}
{"id": "Make bread|5", "answers": ["shape of dough was loose before and formed into a ball afterwards", "state of dough was loose before and formed afterwards", "texture of dough was loose before and formed into a ball afterwards", "state of dough was loose before and formed afterwards", "texture of dough was loose before and formed into a ball afterwards", "state of dough was loose before and formed afterwards", "texture of dough was loose before and formed into a ball afterwards", "state of dough was loose before and formed afterwards", "texture of dough was loose before and formed into a ball afterwards", "state of dough was loose before and formed afterwards", "texture of dough was loose before and formed into a ball afterwards", "shape of dough was loose before and formed into a ball afterwards"]}
{"id": "Make bread|6", "answers": ["size of dough was small before and large afterwards", "size of dough was small before and large afterwards", "size of dough was small before and large afterwards", "size of dough was small before and large afterwards", "size of dough was small before and large afterwards", "size of dough was small before and large afterwards", "size of dough was small before and large afterwards", "size of dough was small before and large afterwards", "size of dough was small before and large afterwards", "size of dough was small before and large afterwards", "size of dough was small before and large afterwards", "size of dough was small before and large afterwards", "size of dough was small before and large afterwards", "size of dough was small before and large afterwards"]}
{"id": "Make bread|7", "answers": ["shape of dough was flat before and in a loaf afterwards", "shape of dough was flat before and in a loaf afterwards", "shape of dough was flat before and shaped afterwards", "location of dough was in bowl before and in pan afterwards", "shape of dough was flat before and in loaf afterwards", "shape of dough was flat before and shaped afterwards", "volume of dough was flat before and larger afterwards", "shape of dough was flat before and shaped afterwards", "volume of dough was flat before and larger afterwards", "shape of dough was flat before and shaped afterwards", "location of dough was in bowl before and in pan afterwards"]}
{"id": "Make bread|8", "answers": ["color of bread was white before and brown afterwards", "temperature of bread was cool before and hot afterwards", "temperature of pan was cool before and hot afterwards", "temperature of bread was cool before and hot afterwards", "temperature of pan was cool before and hot afterwards", "temperature of bread was cool before and hot afterwards", "temperature of dough was cool before and hot afterwards", "temperature of pan was cool before and hot afterwards", "temperature of dough was cool before and hot afterwards", "temperature of bread was cool before and hot afterwards", "temperature of pan was cool before and hot afterwards", "temperature of dough was cool before and hot afterwards", "temperature of bread was cool before and hot afterwards", "temperature of dough was cool before and hot afterwards", "temperature of pan was cool before and hot afterwards", "temperature of dough was cool before and hot afterwards", "temperature of bread was cold before and hot afterwards", "temperature of pan was cool before and hot afterwards", "temperature of dough was cool before and hot afterwards", "temperature of bread was cold before and hot afterwards", "temperature of pan was cool before and hot afterwards"]}
{"id": "Make bread|9", "answers": ["state of the bread was in the oven before and now out of the oven afterwards", "location of the bread was in the oven before and on a cooling rack afterwards", "temperature of the bread was hot before and now cooler afterwards", "temperature of the bread was hot before and now cooler afterwards", "temperature of the bread was hot before and now cooler afterwards", "temperature of the bread was hot before and now cooler afterwards", "temperature of the bread was hot before and now cooler afterwards", "temperature of the bread was hot before and now cooler afterwards", "temperature of the bread was hot before and now cooler afterwards", "temperature of the bread was hot before and now cooler afterwards", "temperature of the bread was hot before and now cooler afterwards", "temperature of the bread was hot before and now cooler afterwards", "temperature of the bread was hot before and now cooler afterwards", "temperature of the bread was hot before and now cooler afterwards", "temperature of the bread was hot before and now cooler afterwards", "temperature of the bread was hot before and now cooler afterwards", "temperature of the bread was hot before and now cooler afterwards", "temperature of the bread was hot before and now cooler afterwards", "temperature of the bread was hot before and now cool afterwards"]}
{"id": "Make bread|10", "answers": ["temperature of bread was hot before and cool afterwards", "temperature of bread was hot before and cool afterwards", "temperature of bread was hot before and cool afterwards", "texture of bread was soft before and crunchy afterwards", "temperature of bread was hot before and cool afterwards", "location of bread was in oven before and out of oven afterwards", "temperature of bread was hot before and cool afterwards", "temperature of bread was hot before and cool afterwards", "temperature of bread was hot before and cool afterwards", "texture of bread was soft before and crunchy afterwards", "temperature of bread was hot before and cool afterwards", "temperature of bread was hot before and cool afterwards", "texture of bread was soft before and crunchy afterwards", "temperature of bread was hot before and cool afterwards", "temperature of bread was hot before and cool afterwards", "location of bread was in oven before and on counter afterwards", "temperature of bread was hot before and cool afterwards"]}
{"id": "Make instant cup noodles|1", "answers": ["location of packaging was on the bottle before and off the bottle afterwards", "location of packaging was on the bottle before and off the bottle afterwards", "location of packaging was on the bottle before and off the bottle afterwards", "location of packaging was on the bottle before and off the bottle afterwards", "location of packaging was on the bottle before and removed afterwards", "location of packaging was on the bottle before and off the bottle afterwards", "location of packaging was on the bottle before and removed afterwards", "location of packaging was on the bottle before and removed afterwards", "location of packaging was on the bottle before and removed afterwards"]}
{"id": "Make instant cup noodles|2", "answers": ["state of top of cup was closed before and open afterwards", "state of top of cup was closed before and open afterwards", "state of top of cup was closed before and open afterwards", "state of top of cup was closed before and open afterwards", "state of top of cup was closed before and open afterwards", "state of top of cup was closed before and open afterwards"]}
{"id": "Make instant cup noodles|3", "answers": ["location of water was in kettle before and in cup afterwards", "temperature of cup was cool before and hot afterwards", "volume of cup was empty before and full afterwards", "temperature of cup was cool before and hot afterwards", "temperature of cup was cool before and hot afterwards", "temperature of cup was cool before and hot afterwards", "temperature of water was cool before and boiling afterwards", "temperature of cup was cool before and hot afterwards", "temperature of water was cool before and hot afterwards", "location of water was in kettle before and in cup afterwards", "temperature of water was cool before and hot afterwards", "temperature of water was cool before and hot afterwards", "temperature of water was cold before and hot afterwards", "location of water was in kettle before and in cup afterwards"]}
{"id": "Make instant cup noodles|4", "answers": ["state of lid was open before and closed afterwards", "state of cup was open before and closed afterwards", "location of lid was on table before and on cup afterwards", "state of lid was open before and closed afterwards", "location of lid was on the table before and on the cup afterwards", "state of cup was open before and closed afterwards", "location of lid was off cup before and on cup afterwards", "state of lid was open before and closed afterwards", "state of cup was open before and closed afterwards"]}
{"id": "Make instant cup noodles|5", "answers": ["state of timer was off before and on afterwards", "state of cup was uncovered before and covered afterwards", "state of timer was off before and on afterwards", "state of cup was uncovered before and covered afterwards", "state of timer was empty before and full afterwards", "state of cup was uncovered before and covered afterwards", "state of timer was empty before and full afterwards", "state of timer was empty before and has a number afterwards", "state of cup was open before and closed afterwards", "state of timer was empty before and full afterwards", "state of cup was open before and closed afterwards", "state of timer was empty before and full afterwards"]}
{"id": "Make instant cup noodles|6", "answers": ["state of timer was off before and on afterwards", "state of cup was full of water before and empty afterwards", "state of timer was off before and on afterwards", "state of cup was full of water before and empty afterwards", "state of water was boiling before and cool afterwards", "state of timer was off before and on afterwards", "state of cup was full of water before and empty afterwards", "state of water was boiling before and cool afterwards"]}
{"id": "Make instant cup noodles|7", "answers": ["state of cup was closed before and open afterwards", "state of noodles was in cup before and open afterwards", "location of cup was on the table before and on the person's hand afterwards", "state of lid was on before and off afterwards", "state of cup was closed before and open afterwards", "location of cup was on the table before and on the person's hand afterwards", "location of noodles was in the cup before and in the bowl afterwards", "location of timer was on the table before and off the table afterwards", "location of noodles was in cup before and in hand afterwards"]}
{"id": "Do laundry|1", "answers": ["location of clothes was together before and separated by color afterwards", "organization of clothes was together before and seperate afterwards", "color of clothes was mixed before and separated by color afterwards", "location of clothes was in the same place before and separated afterwards", "color of clothes was mixed before and separated by color afterwards"]}
{"id": "Do laundry|2", "answers": ["location of items was in pockets before and in trash afterwards", "location of miscellaneous items was in pockets before and in trash afterwards", "location of items was in pockets before and in trash afterwards", "location of items was in pockets before and in trash afterwards"]}
{"id": "Do laundry|3", "answers": ["location of clothes was on the floor before and in the washing machine afterwards", "location of clothes was in hand before and in washing machine afterwards", "location of clothes was on the floor before and in the washing machine afterwards", "location of clothes was in hand before and in washing machine afterwards", "location of clothes was on the table before and in the washing machine afterwards", "location of clothes was on the table before and in the washing machine afterwards", "location of clothes was on the table before and in the washing machine afterwards", "location of clothes was on the table before and in the washing machine afterwards", "location of clothes was on the table before and in the washing machine afterwards"]}
{"id": "Do laundry|4", "answers": ["location of soap was in the bottle before and in the washing machine afterwards", "location of soap was in the bottle before and in the washing machine afterwards", "weight of the washing machine was lighter before and heavier afterwards", "location of soap was in the bottle before and in the washing machine afterwards", "location of soap was in the bottle before and in the washing machine afterwards", "weight of the washing machine was lighter before and heavier afterwards", "location of soap was in the bottle before and in the washing machine afterwards", "weight of washing machine was lighter before and heavier afterwards", "location of soap was in bottle before and in washing machine afterwards", "weight of the bottle was heavier before and lighter afterwards", "location of soap was in bottle before and in washing machine afterwards", "weight of washing machine was lighter before and heavier afterwards", "location of soap was in bottle before and in washing machine afterwards"]}
{"id": "Do laundry|5", "answers": ["state of washing machine was on spin before and in cycle afterwards", "state of washing machine was off before and on afterwards", "location of water was in faucet before and in washing machine afterwards", "state of cycle was unselected before and selected afterwards", "state of water temperature was unselected before and selected afterwards", "state of washing cycle was unselected before and selected afterwards", "state of water temperature was unselected before and selected afterwards", "state of speed was unselected before and selected afterwards"]}
{"id": "Do laundry|6", "answers": ["state of washing machine was off before and on afterwards", "power of washing machine was off before and on afterwards", "state of washing machine was off before and on afterwards", "state of washing machine was off before and on afterwards", "state of washing machine was off before and on afterwards", "state of washing machine was off before and on afterwards", "state of washing machine was off before and on afterwards", "state of washing machine was off before and on afterwards", "state of washing machine was off before and on afterwards"]}
{"id": "Do laundry|7", "answers": ["state of washing machine was on before and off afterwards", "power of washing machine was on before and off afterwards", "location of water was in the pipes before and in the washing machine afterwards", "state of washing machine was on before and off afterwards", "location of soap was in the washing machine before and in the trash afterwards", "location of clothes was in the washing machine before and in the trash afterwards", "state of machine was on before and off afterwards", "location of water was in pipes before and in washing machine afterwards"]}
{"id": "Do laundry|8", "answers": ["location of clothes was in machine before and out of machine afterwards", "location of clothes was in washing machine before and out of washing machine afterwards", "location of clothes was in machine before and out of machine afterwards", "location of clothes was in washing machine before and out of washing machine afterwards", "location of clothes was in machine before and out of machine afterwards"]}
{"id": "Hard-boil an egg.|1", "answers": ["location of pot was empty before and full afterwards", "location of water was in faucet before and in pot afterwards", "volume of pot was empty before and full afterwards", "location of water was in pipes before and in pot afterwards", "location of water was in pipes before and in pot afterwards", "volume of pot was empty before and full afterwards", "location of water was in pipes before and in pot afterwards", "location of water was in pipes before and in pot afterwards", "location of water was in pipes before and in pot afterwards", "location of water was in pipes before and in pot afterwards", "volume of pot was empty before and full afterwards"]}
{"id": "Hard-boil an egg.|2", "answers": ["temperature of egg was room temperature before and warmer afterwards", "location of egg was in shell before and in pot afterwards", "state of egg was whole before and cracked afterwards", "location of egg was in shell before and in pot afterwards", "state of pot was empty before and full afterwards", "location of egg was in shell before and in pot afterwards", "state of egg was whole before and cracked afterwards", "location of egg was in shell before and in pot afterwards", "state of egg was whole before and cracked afterwards", "location of eggshell was on the egg before and in the trash afterwards", "location of egg was in shell before and in pot afterwards", "state of egg was whole before and cracked afterwards"]}
{"id": "Hard-boil an egg.|3", "answers": ["temperature of pot was cold before and hot afterwards", "temperature of pot was cold before and hot afterwards", "temperature of stove was cold before and hot afterwards", "temperature of pot was cold before and hot afterwards", "temperature of pot was cold before and hot afterwards", "temperature of stove was cold before and hot afterwards", "temperature of pot was cold before and hot afterwards", "temperature of stove was cold before and hot afterwards", "temperature of water was cold before and hot afterwards", "temperature of pot was cold before and hot afterwards", "temperature of stove was cold before and hot afterwards", "temperature of water was cold before and hot afterwards", "temperature of stove was cold before and hot afterwards", "temperature of water was cold before and hot afterwards"]}
{"id": "Hard-boil an egg.|4", "answers": ["temperature of water was cold before and hot afterwards", "state of water was still before and boiling afterwards", "temperature of water was cold before and hot afterwards", "temperature of pot was cold before and hot afterwards", "temperature of water was cold before and hot afterwards", "temperature of water was cold before and hot afterwards", "temperature of water was cold before and hot afterwards", "temperature of stove was cool before and hot afterwards", "temperature of water was cold before and hot afterwards", "temperature of water was cold before and hot afterwards", "temperature of water was cold before and hot afterwards", "temperature of water was cold before and hot afterwards", "temperature of stove was cool before and hot afterwards"]}
{"id": "Hard-boil an egg.|5", "answers": ["temperature of egg was cooler before and hotter afterwards", "state of egg was raw before and cooked afterwards", "temperature of water was cool before and hot afterwards", "temperature of water was cool before and hot afterwards", "state of egg was raw before and cooked afterwards", "temperature of water was cool before and hot afterwards", "temperature of water was cool before and hot afterwards", "temperature of water was cool before and hot afterwards", "temperature of water was cool before and hot afterwards", "temperature of water was cool before and hot afterwards", "state of egg was raw before and cooked afterwards", "temperature of water was cool before and hot afterwards", "temperature of water was cool before and hot afterwards", "temperature of water was cool before and hot afterwards"]}
{"id": "Hard-boil an egg.|6", "answers": ["temperature of pot was hot before and cooler afterwards", "temperature of egg was hot before and cooler afterwards", "temperature of water was hot before and cooler afterwards", "temperature of egg was hot before and cooler afterwards", "temperature of egg was hot before and cooler afterwards", "temperature of pot was hot before and cool afterwards", "temperature of water was hot before and cool afterwards", "temperature of egg was hot before and cool afterwards", "temperature of egg was hot before and cool afterwards", "temperature of water was hot before and cool afterwards", "temperature of egg was hot before and cool afterwards", "temperature of egg was hot before and cooler afterwards", "temperature of water was hot before and cool afterwards", "temperature of stove was hot before and cool afterwards", "temperature of egg was hot before and cool afterwards", "temperature of egg was hot before and cool afterwards", "temperature of egg was hot before and cool afterwards", "temperature of egg was hot before and cool afterwards", "temperature of water was hot before and cool afterwards"]}
{"id": "Hard-boil an egg.|7", "answers": ["temperature of water was hot before and cold afterwards", "temperature of egg was hot before and cold afterwards", "temperature of water was hot before and cold afterwards", "temperature of egg was hot before and cold afterwards", "location of egg was in the pot before and out of the pot afterwards", "temperature of water was hot before and cold afterwards", "temperature of egg was hot before and cold afterwards", "temperature of pot was hot before and cold afterwards", "temperature of egg was hot before and cold afterwards", "temperature of water was hot before and cold afterwards", "temperature of egg was hot before and cold afterwards", "temperature of water was hot before and cold afterwards", "temperature of egg was hot before and cold afterwards", "temperature of water was hot before and cold afterwards", "temperature of egg was hot before and cold afterwards", "location of egg was in the pot before and out of the pot afterwards", "temperature of water was hot before and cold afterwards"]}
{"id": "Mail a postcard|1", "answers": ["location of money was in wallet before and in postcard afterwards", "ownership of postcard was owned by the store before and owned by the person afterwards", "location of postcard was at the store before and in the home afterwards", "ownership of postcard was owned by the store before and bought by the person afterwards", "location of postcard was at the store before and in the home afterwards", "location of money was in wallet before and in postcard afterwards", "ownership of postcard was owned by the store before and bought by the person afterwards", "location of money was in wallet before and in postcard afterwards", "location of postcard was at the store before and in the home afterwards", "location of money was in wallet before and in postcard afterwards"]}
{"id": "Mail a postcard|2", "answers": ["location of ink was in pen before and on paper afterwards", "state of postcard was blank before and written on afterwards", "state of postcard was blank before and written on afterwards", "state of postcard was blank before and written on afterwards", "state of postcard was blank before and written on afterwards", "state of postcard was blank before and written on afterwards", "location of ink was in pen before and on paper afterwards", "state of postcard was blank before and written on afterwards", "location of ink was in pen before and on paper afterwards"]}
{"id": "Mail a postcard|3", "answers": ["location of address was on the postcard before and on the postcard afterwards", "location of address was in wallet before and on postcard afterwards", "location of address was in wallet before and on postcard afterwards", "location of postcard was in hand before and in mailbox afterwards", "location of address was in wallet before and on postcard afterwards", "location of address was in hand before and on postcard afterwards", "location of postcard was in hand before and in mailbox afterwards"]}
{"id": "Mail a postcard|4", "answers": ["location of postcard was in hand before and in mailbox afterwards", "location of postcard was in hand before and in mailbox afterwards", "location of postcard was in hand before and in mailbox afterwards", "location of postcard was in hand before and in mailbox afterwards", "location of postcard was in hand before and in mailbox afterwards", "location of postcard was in hand before and in mailbox afterwards", "location of postcard was in hand before and in mailbox afterwards"]}
{"id": "Mail a postcard|5", "answers": ["location of stamp was at the store before and at home afterwards", "state of stamp was unused before and used afterwards", "location of stamp was at store before and at home afterwards", "location of stamp was at store before and at home afterwards", "location of stamp was at store before and at home afterwards", "state of stamp was unused before and used afterwards", "location of stamp was at store before and at home afterwards"]}
{"id": "Mail a postcard|6", "answers": ["location of stamp was on the counter before and on the postcard afterwards", "state of postcard was without stamp before and stamped afterwards", "location of stamp was in the package before and on the postcard afterwards", "location of stamp was in the package before and on the postcard afterwards", "location of stamp was in the package before and on the postcard afterwards", "location of stamp was in the package before and on the postcard afterwards", "location of stamp was in the package before and on the postcard afterwards", "state of postcard was blank before and marked afterwards", "location of stamp was in the package before and on the postcard afterwards", "location of stamp was in the package before and on the postcard afterwards", "state of postcard was blank before and stamped afterwards"]}
{"id": "Mail a postcard|7", "answers": ["location of postcard was in hand before and in mailbox afterwards", "location of the postcard was in the hand before and in the mailbox afterwards", "location of the postcard was in the hand before and in the mailbox afterwards", "location of the postcard was in the hand before and in the mailbox afterwards", "location of the postcard was in the hand before and in the mailbox afterwards", "location of the postcard was in the hand before and in the mailbox afterwards", "location of the postcard was in the hand before and in the mailbox afterwards"]}
{"id": "Drying damp book|1", "answers": ["location of dry room was in closet before and in hand afterwards", "location of dry room was in closet before and in hand afterwards", "location of person was outside the dry room before and inside the dry room afterwards", "state of dry room was dry before and wet afterwards", "location of person was outside the dry room before and inside the dry room afterwards", "state of dry room was dry before and wet afterwards"]}
{"id": "Drying damp book|2", "answers": ["orientation of book was flat before and upright afterwards", "orientation of book was flat before and upright afterwards", "location of book was in the library before and in the room afterwards", "orientation of book was flat before and upright afterwards", "location of book was in library before and in room afterwards", "orientation of book was flat before and upright afterwards"]}
{"id": "Drying damp book|3", "answers": ["orientation of pages was stacked before and fan out afterwards", "orientation of pages was flat before and fan out afterwards", "orientation of pages was stacked before and fan out afterwards", "orientation of pages was stacked before and fan out afterwards", "location of pages was in a pile before and on a table afterwards", "orientation of pages was stacked before and fan out afterwards", "location of pages was in a pile before and on a table afterwards"]}
{"id": "Drying damp book|4", "answers": ["location of fan was off before and on afterwards", "orientation of fan was off before and on afterwards", "orientation of fan was off before and on afterwards", "orientation of fan was off before and on afterwards", "orientation of fan was off before and on afterwards", "orientation of fan was off before and on afterwards", "orientation of fan was off before and on afterwards", "orientation of fan was off before and on afterwards", "orientation of pages was flat before and fan out afterwards"]}
{"id": "Drying damp book|5", "answers": ["location of book was in the dry room before and on the table afterwards", "location of book was in the dry room before and on the table afterwards", "location of book was in the dry room before and on the table afterwards", "state of pages was wet before and dry afterwards", "location of book was in the dry room before and on the table afterwards", "location of book was in the dry room before and on the table afterwards", "volume of book was full before and empty afterwards", "weight of book was heavy before and light afterwards", "location of book was in the dry room before and on the table afterwards"]}
{"id": "Fold a paper airplane|1", "answers": ["state of paper was uncut before and cut afterwards", "state of paper was whole before and cut afterwards", "state of scissors was unused before and used afterwards", "state of paper was whole before and cut afterwards", "state of paper was whole before and cut afterwards", "state of scissors was unused before and used afterwards", "state of paper was whole before and cut afterwards", "state of paper was whole before and cut up afterwards"]}
{"id": "Fold a paper airplane|2", "answers": ["state of paper was uncreased before and creased afterwards", "state of paper was flat before and creased afterwards", "state of paper was uncreased before and creased afterwards", "state of paper was flat before and creased afterwards", "state of paper was uncreased before and creased afterwards", "state of paper was flat before and creased afterwards"]}
{"id": "Fold a paper airplane|3", "answers": ["state of crease was closed before and open afterwards", "state of paper was flat before and creased afterwards", "state of paper was flat before and creased afterwards", "state of crease was absent before and present afterwards", "state of paper was flat before and creased afterwards", "state of paper was flat before and re-opened afterwards"]}
{"id": "Fold a paper airplane|4", "answers": ["shape of paper was flat before and creased afterwards", "shape of paper was flat before and creased afterwards", "shape of paper was flat before and creased afterwards", "shape of paper was flat before and creased afterwards", "shape of paper was flat before and creased afterwards", "shape of paper was flat before and creased afterwards"]}
{"id": "Fold a paper airplane|5", "answers": ["shape of paper was flat before and creased afterwards", "shape of paper was flat before and creased afterwards", "shape of paper was flat before and creased afterwards", "shape of paper was flat before and creased afterwards", "shape of paper was flat before and creased afterwards"]}
{"id": "Fold a paper airplane|6", "answers": ["shape of paper was flat before and creased afterwards", "shape of paper was flat before and creased afterwards", "shape of paper was flat before and creased afterwards", "shape of paper was flat before and creased afterwards", "shape of paper was flat before and creased afterwards", "shape of paper was flat before and creased afterwards"]}
{"id": "Fold a paper airplane|7", "answers": ["location of wings was separate before and attached afterwards", "shape of paper was flat before and folded afterwards", "shape of paper was flat before and folded afterwards", "location of wings was in the crease before and on the paper afterwards", "shape of paper was flat before and folded afterwards"]}
{"id": "Wrapping a Toga|1", "answers": ["shape of cloth was flat before and folded afterwards", "shape of cloth was flat before and folded afterwards", "shape of cloth was flat before and folded afterwards", "shape of cloth was flat before and folded afterwards", "shape of cloth was flat before and folded afterwards", "shape of cloth was flat before and folded afterwards"]}
[truncated: 739,799 more chars]
