# Supplementary material
Source: ML conference proceedings conference paper supplement (https://aclanthology.org/2023.findings-eacl.31)
Supplement: dataset [file 2023.findings-eacl.31.dataset.zip › causal_reasoning_of_entities_and_events/gpt3/legacy_trials/weiqiu1.0/ft_gpt3_on_openpi_data.jsonl]

{"prompt": "Be in a fighting position with this person. Now, what happens?\n", "completion": "position of fists was open before and closed afterwards, position of fighter was alone before and facing an opponent afterwards, energy of body was calm before and tense afterwards, position of arms was down before and up afterwards, flexibility of knees was locked before and bent afterwards, location of body was elsewhere before and on the mat afterwards, placement of hands was kept to self before and now placed on other person afterwards, energy of muscles was relaxed before and tight afterwards, position of a normal position was taken before and now changed to a fighting position afterwards\n###\n"}
{"prompt": "Be in a fighting position with this person. Turn around, stepping away from them, pulling them towards you (this throws off their balance), and grab their arm. Now, what happens?\n", "completion": "orientation of position was face to face before and side by side afterwards, position of body was facing forward before and turning away afterwards, location of body was closer to the opoponent before and further from the opponent afterwards, activity of arm was relaxed before and active afterwards, texture of hand was empty before and holding something afterwards, state of you was locked in position with other person before and now pulling the other person towards you afterwards, placement of you was grabbing shoulders before and now grabbing arm afterwards, balance of they was on balance before and now off balance afterwards, location of feet was planted before and moving afterwards, position of you was facing other person before and now turned away from other person afterwards, state of arm was free before and grasped afterwards, configuration of fist was closed before and open afterwards, balance of opponent was balanced before and imbalanced afterwards\n###\n"}
{"prompt": "Be in a fighting position with this person. Turn around, stepping away from them, pulling them towards you (this throws off their balance), and grab their arm. Roll them off of your hip. Now, what happens?\n", "completion": "direction of arms was pulling toward you before and pushing away from you afterwards, position of they was on floor before and now lifted off the floor afterwards, motion of feet was moving before and planted afterwards, activity of hip was moving before and still afterwards, location of person was standing before and in air afterwards, location of opponent was on hip before and off of hip afterwards, state of hip was covered before and uncovered afterwards, location of opponents body was standing before and against hip afterwards, location of feet was on ground before and in air afterwards\n###\n"}
{"prompt": "Be in a fighting position with this person. Turn around, stepping away from them, pulling them towards you (this throws off their balance), and grab their arm. Roll them off of your hip. Once they are on the ground make sure they slap the floor as they hit to prevent friction. Now, what happens?\n", "completion": "fullness of floor was less covered before and more covered afterwards, location of person was in air before and on ground afterwards, movement of body was in motion before and paused afterwards, location of opponent was in contact before and on the ground afterwards, location of opponent was on the hip before and on the ground afterwards, position of they was in air before and now on ground afterwards, contact of opponent's hands was empty before and touching floor afterwards\n###\n"}
{"prompt": "Examine the trash bag you place in the garbage. Now, what happens?\n", "completion": "fullness of trash bag container was more full before and less full afterwards, weight of trash bag container was heavier before and lighter afterwards, location of trash bag was in a container before and on the ground afterwards, position of trash bag was folded up before and laid flat afterwards, state of trash can was empty before and has bag in it afterwards\n###\n"}
{"prompt": "Examine the trash bag you place in the garbage. Lay one layer (or section) of newspaper along the bottom of a clean, empty trash can. Now, what happens?\n", "completion": "fullness of trash can was empty before and more full afterwards, openness of trash can was closed before and open afterwards, container of trash can was empty before and lined with newspaper afterwards, location of newspaper was on the floor before and in the empty trash can afterwards, state of trash can was empty before and lined with newspaper afterwards, cleanness of trash can was dirty before and clean afterwards, ownership of newspaper was the property of the store before and is the property of the shopper afterwards, location of newspaper was outside of trash can before and in trash can afterwards, location of newspaper was on the floor before and in the trash afterwards, location of newspaper was on the table before and lining the trash can afterwards, cleanness of trash can was clean before and dirty afterwards\n###\n"}
{"prompt": "Examine the trash bag you place in the garbage. Lay one layer (or section) of newspaper along the bottom of a clean, empty trash can. Place plastic trash bag in the trash can. Now, what happens?\n", "completion": "openness of plastic bag was closed before and open afterwards, fullness of trash can was less full before and more full afterwards, location of plastic bag was on the floor before and in the trash afterwards, location of trash bag was in box before and in the trash can afterwards, location of trash bag was outside of trash can before and inside trash can afterwards, lining of trash can was unlined before and lined afterwards, location of plastic bag was in the person's hand before and covering the trash can afterwards\n###\n"}
{"prompt": "Examine the trash bag you place in the garbage. Lay one layer (or section) of newspaper along the bottom of a clean, empty trash can. Place plastic trash bag in the trash can. Add a layer of newspaper to the bottom of the trash bag. Now, what happens?\n", "completion": "location of newspaper was outside of trash bag before and inside trash bag afterwards, weight of trash can was lighter before and heavier afterwards, fullness of trash bag was empty before and more full afterwards, state of trash bag was empty before and lined with newspaper afterwards, container of trash bag was empty before and lined with newspaper afterwards, location of newspaper was on the floor before and in the trash bag afterwards, location of newspaper was on the floor before and in trash can afterwards, weight of trash bag was unweighted before and weighted down afterwards\n###\n"}
{"prompt": "Wear clothes made from natural fibers (cotton, silk, linen, hemp and such) as much as possible. Now, what happens?\n", "completion": "material of clothes was made of synthetic fibers before and made of natural fibers afterwards, temperature of skin was bare before and clothed afterwards, location of clothes was in closet before and on a person's body afterwards, wearing of other clothes was being worn more often before and being worn less often afterwards, size of clothes was constricting before and lose afterwards, location of clothes was in closet before and on body afterwards, cost of clothes was inexpensive before and more expensive afterwards\n###\n"}
{"prompt": "Wear clothes made from natural fibers (cotton, silk, linen, hemp and such) as much as possible. Remove any belts with large buckles. Now, what happens?\n", "completion": "state of large buckles was buckled before and unbuckled afterwards, location of belts was in closet before and in bin afterwards, location of belt was around waist before and removed afterwards, state of belt was on before and off afterwards, wearing of buckles was being worn before and removed afterwards, weight of belt was heavy before and light afterwards, state of body was tense before and relaxed afterwards\n###\n"}
{"prompt": "Wear clothes made from natural fibers (cotton, silk, linen, hemp and such) as much as possible. Remove any belts with large buckles. Be careful about necklaces, bracelets and earrings. Now, what happens?\n", "completion": "state of person was unaware of jewelry before and aware of jewelry afterwards, awareness of necklaces was unattended too before and being attended too afterwards\n###\n"}
{"prompt": "Wear clothes made from natural fibers (cotton, silk, linen, hemp and such) as much as possible. Remove any belts with large buckles. Be careful about necklaces, bracelets and earrings. Remove any extra layers of clothing, such as jackets and sweaters. Now, what happens?\n", "completion": "wearing of extra layers was being worn before and now removed afterwards, thickness of clothes was multiple layers before and single layer afterwards, state of jacket was on before and off afterwards, location of extra layers was on body before and off body afterwards, placement of sweater was on before and off afterwards, fullness of bin was empty before and filled afterwards, temperature of body was hot before and less hot afterwards, depth of clothing was layered before and single layer afterwards, temperature of person was warm before and cold afterwards, location of jacket was on body before and in bin afterwards, weight of clothing was heavy before and light afterwards, location of sweater was on body before and in bin afterwards\n###\n"}
{"prompt": "Allow the ink to dry. Now, what happens?\n", "completion": "wetness of ink was wet before and dry afterwards, moisture of ink was wet before and dry afterwards, location of ink was in pen before and on ball afterwards\n###\n"}
{"prompt": "Allow the ink to dry. Avoid excessive handling of an autographed baseball. Now, what happens?\n", "completion": "There will be no change.\n###\n"}
{"prompt": "Allow the ink to dry. Avoid excessive handling of an autographed baseball. Keep your autographed baseball in a glass display case that protects it from UV rays. Now, what happens?\n", "completion": "state of ball was exposed before and protected afterwards, state of uv rays was causing damage before and eliminated afterwards, capacity of display case was empty before and full afterwards, state of case was open before and closed afterwards, location of ball was on table before and in case afterwards, state of card was vulnerable before and protected afterwards, location of card was outside of case before and inside case afterwards\n###\n"}
{"prompt": "Allow the ink to dry. Avoid excessive handling of an autographed baseball. Keep your autographed baseball in a glass display case that protects it from UV rays. Create the proper environment for your autographed baseball. Now, what happens?\n", "completion": "There will be no change.\n###\n"}
{"prompt": "Take the Groovehoop and place it on the small of your back. Now, what happens?\n", "completion": "state of back was empty before and carrying afterwards, location of groovehoop was on the ground before and on the small of your back afterwards, organization of back was plain before and attached to groovehop afterwards, location of groovehop was elsewhere before and on the small of your back afterwards, grovehoop placement of grovehoop was on floor before and placed against small of back afterwards, state of groovehoop was unused before and used afterwards\n###\n"}
{"prompt": "Take the Groovehoop and place it on the small of your back. Try the walking trick. Now, what happens?\n", "completion": "movement of hips was still before and moving afterwards, movement of groovehop was still before and moving afterwards\n###\n"}
{"prompt": "Take the Groovehoop and place it on the small of your back. Try the walking trick. Try the turning trick. Now, what happens?\n", "completion": "movement of groovehop was walking before and turning afterwards, movement of legs was still before and moving afterwards\n###\n"}
{"prompt": "Take the Groovehoop and place it on the small of your back. Try the walking trick. Try the turning trick. Keep practicing. Now, what happens?\n", "completion": "state of practice was undone before and done afterwards, familiarity of person was inexperienced before and experienced afterwards, skill of person was unskilled before and skilled afterwards, newness of groovehop was new before and used afterwards\n###\n"}
{"prompt": "Measure around the head. Now, what happens?\n", "completion": "knowledge of head was unmeasured before and measured afterwards, tape measure of tape measure was in box before and measured around head afterwards, state of head was unmeasured before and measured afterwards\n###\n"}
{"prompt": "Measure around the head. Measure your head from back to front. Now, what happens?\n", "completion": "knowledge of head was unmeasured before and measured afterwards, head of head was left alone before and measured front to back afterwards\n###\n"}
{"prompt": "Measure around the head. Measure your head from back to front. Measure your head from side to side. Now, what happens?\n", "completion": "knowledge of head was unmeasured before and measured afterwards, head of head was left alone before and measured from side to side afterwards\n###\n"}
{"prompt": "Measure around the head. Measure your head from back to front. Measure your head from side to side. Finished.[3]######//&lt;! Now, what happens?\n", "completion": "complexity of project was started before and finished afterwards\n###\n"}
{"prompt": "Take It Easy - The first thing to do is relax. Now, what happens?\n", "completion": "freeness of fish was swimming freely before and caught on hook afterwards, tension of person was tense before and relaxed afterwards, agitation of person was tense before and relaxed afterwards, location of fish was loose in the water before and on the hook afterwards\n###\n"}
{"prompt": "Take It Easy - The first thing to do is relax. Steady As She Goes - When the fish slows down and stops taking more line, it’s time to go to work. Now, what happens?\n", "completion": "wetness of line was dry before and wet afterwards, speed of fish was faster before and slower afterwards, energy level of fish was fighting before and tired afterwards, speed of fish was moving before and slowed afterwards, length of line was reeled before and spun out afterwards, movement of line was going out before and staying steady afterwards, length of line was shorter before and longer afterwards, location of line was on reel before and in water afterwards, activity of fish was pulling line before and swimming around line afterwards\n###\n"}
{"prompt": "Take It Easy - The first thing to do is relax. Steady As She Goes - When the fish slows down and stops taking more line, it’s time to go to work. Close The Deal - When the fish gets close, this is a critical time in the fight because often it will panic when it sees the boat. Now, what happens?\n", "completion": "calmness of fish was calm before and panicking afterwards, emotional  state of person was calm before and aggressive afterwards, emotional state of fish was calm before and panicked afterwards, activity of fish was less active before and more active afterwards, distance of fish was distant before and near afterwards, mood of fish was calm before and panicking afterwards, distance of fish was further away before and closer afterwards\n###\n"}
{"prompt": "Take It Easy - The first thing to do is relax. Steady As She Goes - When the fish slows down and stops taking more line, it’s time to go to work. Close The Deal - When the fish gets close, this is a critical time in the fight because often it will panic when it sees the boat. Catch And Release - Use a net to land the fish. Now, what happens?\n", "completion": "state of line was cast out before and reeled in afterwards, fullness of net was empty before and full afterwards, fullness of boat was less full before and more full afterwards, freedom of fish was free before and caught afterwards, fullness of net was empty before and full of fish afterwards, moisture of net was dry before and wet afterwards, state of net was unused before and used afterwards, location of fish was in the water before and in the net afterwards, location of fish was in water before and in net afterwards, wetness of net was dry before and wet afterwards\n###\n"}
{"prompt": "Find a medium-sized binder clip. Now, what happens?\n", "completion": "fullness of hand was empty before and holding binder clip afterwards, location of binder clip was in the drawer before and in the hand afterwards, state of binder clip was in original place before and found afterwards, state of binder clip was absent before and present afterwards\n###\n"}
{"prompt": "Find a medium-sized binder clip. Leave the tube open to avoid creating trapped air. Now, what happens?\n", "completion": "weight of toothpaste tube was lighter before and heavier afterwards, state of tube was closed before and open afterwards, length of toothpaste tube was longer before and shorter afterwards, state of clip was alone before and clipped to the tube afterwards, location of clip was off tube before and on tube afterwards, straightness of toothpaste tube was straight before and rolled up afterwards\n###\n"}
{"prompt": "Find a medium-sized binder clip. Leave the tube open to avoid creating trapped air. Squeeze the paste you need without any further hassle. Now, what happens?\n", "completion": "location of paste was in toothpaste tube before and squeezed out afterwards, fullness of toothpaste tube was fuller before and emptier afterwards, state of toothpaste tube was by itself before and wrapped in a binder clip afterwards, location of paste was in tube before and out of tube afterwards, location of hand was holding the clip before and holding the tube afterwards, weight of toothpaste tube was heavier before and lighter afterwards, volume of tube was full before and empty afterwards, difficulty of task was more difficult before and easier afterwards\n###\n"}
{"prompt": "Find a medium-sized binder clip. Leave the tube open to avoid creating trapped air. Squeeze the paste you need without any further hassle. Finished. Now, what happens?\n", "completion": "There will be no change.\n###\n"}
{"prompt": "Obtain some white liquid paper. Now, what happens?\n", "completion": "material of writing was done in pencil to avoid mistakes before and done in pen to appear more professional afterwards, availability of white liquid paper was unavailable before and obtained afterwards, location of the liquid paper was elsewher before and with you afterwards, state of you was without liquid paper before and in possession of liquid paper afterwards, ownership of liquid paper was at the store before and in consumers possession afterwards, cost of liquid paper was on sale at store before and purchased from store afterwards, cleanness of written text was messy before and clean afterwards, state of paper was marked wrong before and whited out afterwards\n###\n"}
{"prompt": "Obtain some white liquid paper. Paint a little on the spindle that holds the foot just behind the eye of the needle. Now, what happens?\n", "completion": "color of spindle was paintless before and painted afterwards, weight of the bottle of white liquid paper was heavier before and lighter afterwards, weight of the spindle was lighter before and heaver afterwards, color of spindle was silver before and white afterwards, color of the spindle was unpainted before and painted afterwards, location of foot was in front of the eye of the needle before and behind the eye of the needle afterwards, location of white liquid paper was in bottle before and on spindle afterwards, wetness of spindle was dry before and wet afterwards, wetness of the spindle was dry before and wet afterwards, color of spindle was another color before and white afterwards\n###\n"}
{"prompt": "Obtain some white liquid paper. Paint a little on the spindle that holds the foot just behind the eye of the needle. Allow to dry before use. Now, what happens?\n", "completion": "dryness of spindle was wet before and dry afterwards, wetness of the brush was drier before and wetter afterwards, availability of object was unusable before and usable afterwards, state of area was wet before and dry afterwards, wetness of the spindle was wet before and dry afterwards, wetness of spindle was wet before and dry afterwards, location of the brush was outside of the bottle of liquid paper before and back inside the bottle afterwards\n###\n"}
{"prompt": "Obtain some white liquid paper. Paint a little on the spindle that holds the foot just behind the eye of the needle. Allow to dry before use. Shift the metal plate that slides in and covers the shuttle and hold it at the back of the needle. Now, what happens?\n", "completion": "location of the metal plates was unshifted before and shifted afterwards, location of shuttle was uncovered before and covered afterwards, stability of back of needle was loose before and held in place afterwards, location of metal plate was in place before and shifted afterwards, location of metal plate was unattached before and attached afterwards, orientation of metal plate was forward before and pulled back afterwards\n###\n"}
{"prompt": "Use the hug hold. Now, what happens?\n", "completion": "location of baby was outside of pool before and in pool afterwards, state of baby was unheld before and held afterwards, moisture of baby was dry before and wet afterwards, holding of they was being held normally before and now being held in a hug hold afterwards, placement of baby was unheld with hug hold before and held with hughold afterwards, state of baby was insecure before and secured afterwards\n###\n"}
{"prompt": "Use the hug hold. Try the face-to-face hold. Now, what happens?\n", "completion": "position of they was in arms before and now away from body afterwards, location of baby was facing away before and face to face afterwards, holding of they was in hug hold before and now in face-to-face hold afterwards, placement of baby was held incorrectly before and face-to-face afterwards\n###\n"}
{"prompt": "Use the hug hold. Try the face-to-face hold. Practice the modified face-to-face hold. Now, what happens?\n", "completion": "holding of they was in face-to-face hold before and now in modified face-to-face hold afterwards, state of face to face hold was unmodified before and modified afterwards\n###\n"}
{"prompt": "Use the hug hold. Try the face-to-face hold. Practice the modified face-to-face hold. Use the pass hold. Now, what happens?\n", "completion": "palcement of they was being held by the arm and legs before and now being held by the arm and chest afterwards, holding of they was in modified face-to-face hold before and now in the pass hold afterwards, state of pass hold was unused before and used afterwards\n###\n"}
{"prompt": "Prepare and measure all ingredients. Now, what happens?\n", "completion": "readiness of ingredients was unprepared before and prepared afterwards, location of the ingredients was else where before and gathered in on place afterwards, location of mango was in the fridge before and on the counter afterwards, ownership of mango was the property of the store before and the property of the shopper afterwards, location of knife was in the drawer before and on the counter afterwards, location of measuring cup was in the cupboard before and on the counter afterwards, size of mango, lemon and garlic was whole before and cut into pieces afterwards, state of the ingredients was unprepared before and prepared afterwards\n###\n"}
{"prompt": "Prepare and measure all ingredients. Add all the ingredients to a food processor. Now, what happens?\n", "completion": "composition of the ingredients was separate before and combined afterwards, location of the ingredients was out of the food processor before and in the food processor afterwards, location of ingredients was outside of food processor before and inside of food processor afterwards, container of food processer was empty before and full afterwards, weight of the food processor was lighter before and heavier afterwards, cleanness of food processor was clean before and dirty afterwards, location of ingredients was on the counter before and in the food processor afterwards, wetness of the food processor was dry before and wet afterwards, composition of ingredients was separate before and mixed afterwards, composition of ingredients was separated before and mixed in blender afterwards, state of food processor was off before and on afterwards\n###\n"}
{"prompt": "Prepare and measure all ingredients. Add all the ingredients to a food processor. Blend thoroughly until you achieve a smooth texture. Now, what happens?\n", "completion": "texture of ingredients was lumpy before and smooth afterwards, state of food processor was on before and through blending afterwards, texture of mixture was chunky before and smoother afterwards, composition of the ingredients was mixed loosely before and well mixed afterwards, texture of the texture of the ingredients was rougher before and smooth afterwards, texture of ingredients was intact before and blended afterwards\n###\n"}
{"prompt": "Prepare and measure all ingredients. Add all the ingredients to a food processor. Blend thoroughly until you achieve a smooth texture. Use this mixture to marinate pork, chicken, or other poultry products. Now, what happens?\n", "completion": "cleanness of pan was clean before and dirty afterwards, location of marinade was in the food processor before and in a container afterwards, taste of the food was less tasty before and now tastier afterwards, weight of the food was lighter before and heavier afterwards, location of the mixture was in the blender before and now in a dish afterwards, weight of the blender was heavier before and lighter afterwards, state of meat was plain before and marinated afterwards, taste of meat was bland before and seasoned afterwards, location of meat was in the fridge before and in the pan afterwards\n###\n"}
{"prompt": "If you are finished competing level 5 start working on all the level 6 skills, preparing for the next meet season. Now, what happens?\n", "completion": "state of gymnast was unprepared before and prepared afterwards, completion of level 6 was unachieved before and achieved afterwards, task of level 6 was unstarted before and started afterwards, state of level 5 was unfinished before and finished afterwards, skill of gymnast was practicing level 5 skills before and practicing level 6 skills afterwards, state of level 6 was pending before and started afterwards, knowledge of next season was unprepared before and prepared afterwards\n###\n"}
{"prompt": "If you are finished competing level 5 start working on all the level 6 skills, preparing for the next meet season. A hard event. Now, what happens?\n", "completion": "There will be no change.\n###\n"}
{"prompt": "If you are finished competing level 5 start working on all the level 6 skills, preparing for the next meet season. A hard event. Schedule a private with your coach. Now, what happens?\n", "completion": "appointment of private was unscheduled before and schedule afterwards, state of private was unscheduled before and scheduled afterwards, education of gymnast was practicing alone before and being taught by a coach afterwards, time of appointment was unknown before and known afterwards, organization of lesson was unscheduled before and scheduled afterwards\n###\n"}
{"prompt": "If you are finished competing level 5 start working on all the level 6 skills, preparing for the next meet season. A hard event. Schedule a private with your coach. Do the floor. Now, what happens?\n", "completion": "state of floor was undone before and done afterwards\n###\n"}
{"prompt": "Make up a paste. Now, what happens?\n", "completion": "dryness of baking powder and cream of tartar was dry before and moist afterwards, location of cream of tartar was in the pantry before and in a bowl afterwards, composition of baking soda was separated before and mixed with cream of tartar afterwards, thickness of liquid was thin before and thick afterwards, complexity of ingredients was separate before and combined afterwards, composition of baking powder and cream of tartar was separate before and mixed afterwards, organization of ingredients was seperate before and combined afterwards, granularity of ingredients was powdery before and smooth afterwards, location of ingredients was separate before and combined afterwards, location of baking soda was in the pantry before and in a bowl afterwards, location of spoon was in the drawer before and in the bowl afterwards\n###\n"}
{"prompt": "Make up a paste. Spread the paste across the blue-green stain. Now, what happens?\n", "completion": "visibility of stain was visible before and covered afterwards, state of stain was exposed before and covered afterwards, container of container was full before and less full afterwards, shape of paste was round before and flat afterwards, location of paste was in container before and on floor afterwards, state of scrub sponge was in the bowl before and spreading the mixture afterwards, area of paste was unspread before and spread afterwards, location of paste was in container before and on stain afterwards, state of stain was present before and removed afterwards, location of paste was in bowl before and on stain afterwards, location of paste was in the bowl before and on the stain afterwards, cleanness of scrub sponge was clean before and dirty afterwards\n###\n"}
{"prompt": "Make up a paste. Spread the paste across the blue-green stain. Leave the paste to work on the stain. Now, what happens?\n", "completion": "state of stain was dark before and light afterwards, time of paste was put on the stain before and sitting on the stain for 10 minutes afterwards, state of stain was present before and removed afterwards, location of paste was in bowl before and on stain afterwards\n###\n"}
{"prompt": "Make up a paste. Spread the paste across the blue-green stain. Leave the paste to work on the stain. Rinse off the paste. Now, what happens?\n", "completion": "visibility of stain was covered before and uncovered afterwards, color of stain was blue green before and white afterwards, clarity of water was clear before and cloudy afterwards, location of paste was on stain before and in drain afterwards, state of stain was present before and removed afterwards, cleanness of tile was dirty before and clean afterwards, location of water was in faucet before and in drain afterwards, location of paste was on stain before and off stain afterwards, moisture of paste was dry before and wet afterwards, location of paste was on tile before and removed afterwards, state of paste was on the stain before and rinsed off afterwards, distance of paste was on stain before and below stain afterwards\n###\n"}
{"prompt": "Wash and dry the laundry caps with hot water and soap really good. Now, what happens?\n", "completion": "location of the soap was sitting on the sink before and used on the cap afterwards, cleanness of laundry caps was dirty before and clean afterwards, weight of the laundry caps was heavier before and lighter afterwards, volume of the soap container was fuller before and emptier afterwards, location of water was in faucet before and in drain afterwards, weight of the soap container was heavier before and lighter afterwards, moisture of laundry caps was dry before and wet afterwards, location of soap was in bottle before and in drain afterwards, cleanness of laundry caps was unwashed before and washed afterwards, wetness of laundry caps was dry before and wet afterwards, wetness of the laundry caps was wet before and dry afterwards, cleanness of the laundry caps was dirty before and clean afterwards, temperature of the sink water was room temperature before and heated up for use afterwards, usage of the sink faucet was idle before and running water afterwards\n###\n"}
{"prompt": "Wash and dry the laundry caps with hot water and soap really good. Measure and pour the rice or kernels into one cap. Now, what happens?\n", "completion": "weight of laundry caps was light before and heavy afterwards, location of the rice was in a container before and in the bottle cap afterwards, composition of the container was full of rice before and less full with rice afterwards, usage of the measuring cup was idle before and being used to measure afterwards, location of rice was outside of cap before and inside cap afterwards, composition of the cap was empty before and full of rice afterwards, location of the rice or kernels was in a container before and in the cap afterwards, location of rice was in bag before and in cap afterwards, weight of the rice or kernels container was heavier before and lighter afterwards, weight of the cap was lighter before and heavier afterwards, volume of the rice or kernels container was more full before and less full afterwards, volume of laundry caps was empty before and full afterwards, container of cap was empty before and full of rice afterwards, volume of measuring cup was empty before and full afterwards\n###\n"}
{"prompt": "Wash and dry the laundry caps with hot water and soap really good. Measure and pour the rice or kernels into one cap. Place glue on both cap rims. Now, what happens?\n", "completion": "volume of the glue bottle was containing more glue before and now emptier afterwards, location of glue was in bottle before and on rim afterwards, weight of the glue bottle was heavier before and lighter afterwards, wetness of the rims was dry before and wet afterwards, state of laundry caps was unattached before and glued together afterwards, moisture of rims was dry before and wet afterwards, wetness of cap rim was dry before and covered in glue afterwards, weight of the cap was lighter before and heavier afterwards, texture of cap rims was smooth before and sticky afterwards, location of glue was in bottle before and on cap rim afterwards, composition of the laundry cap rim was dry before and wet with glue afterwards, cleanness of the laundry cap was clean before and sticky with glue afterwards, usage of the glue bottle was sitting on a table before and being put to use afterwards, volume of bottle was full before and empty afterwards, density of the glue was inside of the glue bottle before and exiting the glue bottle afterwards\n###\n"}
{"prompt": "Wash and dry the laundry caps with hot water and soap really good. Measure and pour the rice or kernels into one cap. Place glue on both cap rims. Shake the cap shaker for enjoyment and fun. Now, what happens?\n", "completion": "composition of the laundry caps was separated before and stuck together afterwards, color of the laundry caps was their own colors before and two colors together afterwards, state of the caps was separate before and glued together afterwards, complexity of the laundry caps was a pair before and one afterwards\n###\n"}
{"prompt": "Hold the rope at arm level in front of your chest. Now, what happens?\n", "completion": "tension of rope was loose before and taut afterwards, state of hands was open before and closed afterwards, state of arms was down before and up afterwards, state of hands was separate before and around the rope afterwards, state of muscles was relaxed before and tense afterwards, usage of rope was hanging before and held afterwards, distance of rope was distant before and in front of chest afterwards, height of hands was lowasd before and raised afterwards, fullness of hand was empty before and holding rope afterwards\n###\n"}
{"prompt": "Hold the rope at arm level in front of your chest. Place one hand at about chin-nose height. Now, what happens?\n", "completion": "position of hand was at side before and chin height afterwards, location of hand was in front of chest before and chin height afterwards, state of hand was down before and up afterwards, state of arm was down before and up afterwards, state of hand was closed before and open afterwards\n###\n"}
{"prompt": "Hold the rope at arm level in front of your chest. Place one hand at about chin-nose height. Pull your arm down so that your hand is around nipple height. Now, what happens?\n", "completion": "location of arm was at chin height before and nipple height afterwards, height of hand was raised before and lowasd afterwards, state of hand was up before and down afterwards, state of arm was up before and down afterwards, position of arm was nose height before and nipple height afterwards\n###\n"}
{"prompt": "Hold the rope at arm level in front of your chest. Place one hand at about chin-nose height. Pull your arm down so that your hand is around nipple height. Once your highest hand is at step 3, repeat steps 2-3 with your other arm, &quot;walking&quot; up the rope. Now, what happens?\n", "completion": "position of arm was at side before and chin height afterwards\n###\n"}
{"prompt": "Purchase PVC pipe to make a set of parallettes: Now, what happens?\n", "completion": "location of pvc elbow joints was at hardware store before and at home afterwards, ownership of straight section of pvc pipe was owned by store before and owned by me afterwards, location of money was in wallet before and in cash register afterwards, ownership of pvc pipe was unpurchased before and bought afterwards, availability of pvc pipe was unavailable before and available afterwards, location of pvc pipe was in store before and in home afterwards, location of straight section of pvc pipe was at hardware store before and at home afterwards\n###\n"}
{"prompt": "Purchase PVC pipe to make a set of parallettes: Cut the PVC into sections using a hacksaw: Now, what happens?\n", "completion": "number of straight section of pvc pipe was in one section before and in multiple sections afterwards, composition of pvc was uncut before and cut afterwards, wholeness of pvc pipe was whole before and sectioned afterwards, shape of hacksaw blade was sharp before and dull afterwards, size of pvc was whole before and cut up afterwards, cleanness of sandpaper was clean before and dirty afterwards, usage of hacksaw was unused before and sawing afterwards, number of pvc pipe was one piece before and sections afterwards, size of pvc pipe was long before and shorter afterwards, location of hacksaw was in tool drawer before and in hand afterwards, shape of pvc was whole before and segmented afterwards\n###\n"}
{"prompt": "Purchase PVC pipe to make a set of parallettes: Cut the PVC into sections using a hacksaw: Assemble the pieces as shown: Now, what happens?\n", "completion": "organization of pieces was seperate before and assembled afterwards, continuity of pvc pieces was disconnected before and continuous afterwards, composition of pieces was unassembled before and assembled afterwards\n###\n"}
{"prompt": "Purchase PVC pipe to make a set of parallettes: Cut the PVC into sections using a hacksaw: Assemble the pieces as shown: Repeat step 3 for the second paralette. Now, what happens?\n", "completion": "composition of paralette was unassembled before and assembled afterwards\n###\n"}
{"prompt": "Tamarillos should be fresh, with no green skin around the calyx. Now, what happens?\n", "completion": "state of tamarillo was unripe before and ripe afterwards, color of tamarillo was green before and red afterwards, ownership of tamarillos was owned by store before and bought by you afterwards, knowledge of tamarillos was unselected before and selected afterwards, knowledge of you was less aware of what type of tamarilos to purchase before and more aware afterwards, cost of you was shopping for tamarillos before and purchasing tamarillos afterwards, hardness of tamarillo was hard before and soft afterwards, state of you was needing tamarillos before and in possession of tamarillos afterwards, location of the tamarillos was at the store before and with you afterwards, state of tamarillos was stale before and fresh afterwards\n###\n"}
{"prompt": "Tamarillos should be fresh, with no green skin around the calyx. Tamarillos can be stored at room temperature or in the refrigerator. Now, what happens?\n", "completion": "temp of tamarillos was warm before and cooled in fridge afterwards, location of tamarillos was on counter before and in fridge afterwards, location of tamarillos was at the store before and in the fridge afterwards, temperature of tamarillos was room temperature before and cool afterwards, temperature of tamarillos was room temperature before and cold afterwards, location of tamarillos was on table before and in refrigerator afterwards, volume of fridge was empty before and full afterwards, ownership of tamarillos was owned by the store before and owned by the shopper afterwards\n###\n"}
{"prompt": "Tamarillos should be fresh, with no green skin around the calyx. Tamarillos can be stored at room temperature or in the refrigerator. When using tamarillos, wash first. Now, what happens?\n", "completion": "cleanness of tamarillos was dirty before and cleaned afterwards, wetness of the tamarillos was dry before and wet afterwards, moisture of tamarillos was dry before and wet afterwards, dryness of tamarillos was dry before and wet afterwards, temperature of tamarillos was cold before and warming afterwards, location of dirt was on tamarillos before and in sink afterwards, weight of the tamarillos was lighter before and heavier afterwards, location of the tamarillos was being stored before and at the sink afterwards, cleanness of the tamarillos was dirty before and clean afterwards, location of tamarillos was in the fridge before and on the counter top afterwards, cleanness of tamarillos was dirty before and clean afterwards, location of soap was in bottle before and in sink afterwards, temperature of tamarillos was warm before and cooled by water afterwards\n###\n"}
{"prompt": "Tamarillos should be fresh, with no green skin around the calyx. Tamarillos can be stored at room temperature or in the refrigerator. When using tamarillos, wash first. Use the tamarillo. Now, what happens?\n", "completion": "weight of the tamarillo was heavier before and lighter afterwards, cleanness of towel was clean before and dirty afterwards, wetness of the knife was dry before and wet afterwards, cleanness of the knife was clean before and dirty afterwards, action of knife was sitting on the counter top before and cutting the tamarillos afterwards, state of tamarillos was whole before and eaten afterwards, shape of tamarillos was whole before and sliced afterwards, state of the tamarillo was whole before and cut afterwards, cleanness of knife was clean before and dirty afterwards, state of towel was dry before and wet afterwards\n###\n"}
{"prompt": "Before you start hanging ten on a 12 foot (3.7 m) wave in Hawaii, try riding your first few waves lying down. Now, what happens?\n", "completion": "wetness of board was dry before and wet afterwards, familiarity of person was novice before and slightly experienced afterwards, position of person was standing before and laying afterwards, wetness of person was dry before and wet afterwards, location of board was on land before and in the ocean afterwards, position of person was standing before and lying down afterwards\n###\n"}
{"prompt": "Before you start hanging ten on a 12 foot (3.7 m) wave in Hawaii, try riding your first few waves lying down. Choose the right wave. Now, what happens?\n", "completion": "knowledge of wave was unknown before and known afterwards, knowledge of person was undecided before and certain afterwards, state of person was sitting on surfboard before and standing on surfboard afterwards\n###\n"}
{"prompt": "Before you start hanging ten on a 12 foot (3.7 m) wave in Hawaii, try riding your first few waves lying down. Choose the right wave. Once again, before you start trying to surf a wave standing up, have a practice on the beach. Now, what happens?\n", "completion": "location of person was in the water before and on land afterwards, orientation of surfer was seated before and standing afterwards, wetness of board was wet before and dry afterwards, location of board was in the water before and on land afterwards, location of person was standing on the board while on sand before and standing on board while on water afterwards, usage of board was unladen before and bearing person afterwards, wetness of person was wet before and dry afterwards, position of person was on sand before and on board afterwards\n###\n"}
{"prompt": "Before you start hanging ten on a 12 foot (3.7 m) wave in Hawaii, try riding your first few waves lying down. Choose the right wave. Once again, before you start trying to surf a wave standing up, have a practice on the beach. Wipe out. Now, what happens?\n", "completion": "wetness of person was above water before and in water afterwards, position of person was upright before and falling down afterwards, position of person was above board before and under board afterwards, orientation of waves was under the person before and over the person afterwards, location of board was under person before and loose in the waves afterwards, location of person was on the board before and in the water afterwards, location of person was on board before and in water afterwards, location of surfer was standing on surfboard before and floating in water afterwards\n###\n"}
{"prompt": "Stand with your feet shoulder-width apart. Now, what happens?\n", "completion": "orientation of feet was together before and seperated afterwards, distance of feet was close together before and far apart afterwards, location of feet was close together before and shoulder width apart afterwards, position of body was sitting before and standing afterwards, tension of muscles was relaxed before and tense afterwards, distance of feet was close together before and shoulder-width apart afterwards, state of stance was narrow before and wide afterwards\n###\n"}
{"prompt": "Stand with your feet shoulder-width apart. Lift up on your toes and hold for 10 seconds. Now, what happens?\n", "completion": "location of heels was on the ground before and in the air afterwards, height of body was normal height before and slightly higher than normal height afterwards, strength of toes was relaxed before and taut with effort afterwards, position of feet was on the floor before and elevated afterwards, height of ankles was normal height before and slightly higher than normal height afterwards, orientation of feet was flat on ground before and raised on toes afterwards, state of muscles was relaxed before and flexed afterwards, location of feet was on floor before and in air afterwards\n###\n"}
{"prompt": "Stand with your feet shoulder-width apart. Lift up on your toes and hold for 10 seconds. Lower your feet to the floor. Now, what happens?\n", "completion": "strength of toes was taut before and relaxed afterwards, strength of knees was taut before and relaxed afterwards, orientation of feet was raised before and lowasd afterwards, strength of calves was taut before and relaxed afterwards, state of muscles was flexed before and relaxed afterwards, location of heels was in the sir before and on the ground afterwards, position of feet was in the air before and on the floor afterwards, location of feet was in air before and on floor afterwards\n###\n"}
{"prompt": "Stand with your feet shoulder-width apart. Lift up on your toes and hold for 10 seconds. Lower your feet to the floor. Repeat for as long as it is comfortable. Now, what happens?\n", "completion": "There will be no change.\n###\n"}
{"prompt": "Attach the soft brush attachment to the vacuum cleaner. Now, what happens?\n", "completion": "location of attachment was away from vacuum cleaner before and attached to vacuum cleaner afterwards, location of brush head was in storage before and on the vacuum afterwards, orientation of vacuum was unattached from the brush before and attached to the brush afterwards, power of vacuum was off before and on afterwards, state of vacuum cleaner was bare before and loaded with an attachment afterwards, location of vacuum cleaner was in the closet before and in the bedroom afterwards, fullness of vacuum was empty before and full afterwards, location of feathers was on the pillow before and in the vacuum afterwards\n###\n"}
{"prompt": "Attach the soft brush attachment to the vacuum cleaner. If there are stains on any of the pillows or cushions, these should be treated with spot cleaning focused just on the stain: Now, what happens?\n", "completion": "location of talkum was in the bottle before and on the pillow afterwards, weight of talkum bottle was heavier before and lighter afterwards, dryness of cushion was dry before and wet with stain remover solution afterwards, location of spot cleaner bottle was in the cupboard before and in the bedroom afterwards, cleanness of cushions was stained before and treated afterwards, cleanness of pillows was stained before and clean afterwards, cleanness of cushion was stained before and less stained afterwards, moisture of pillow was dry before and wet afterwards, fullness of talkum bottle was more full before and less full afterwards, dryness of pillow was dry before and wet with stain remover solution afterwards, cleanness of pillows was stained before and treated afterwards\n###\n"}
{"prompt": "Attach the soft brush attachment to the vacuum cleaner. If there are stains on any of the pillows or cushions, these should be treated with spot cleaning focused just on the stain: If you cannot remove a stain using the method suggested previously, you could try laundering a cushion or pillow that has a removable cover. Now, what happens?\n", "completion": "cleanness of cover was stained before and clean afterwards, coverage of pillow was covered before and uncovered afterwards, location of pillow case was on the pillow before and in the basin afterwards, location of cushion was on the chair before and in the washer afterwards, state of pillow was covered before and uncovered afterwards, state of cushion was covered before and uncovered afterwards, location of soap was in a container before and in the basin afterwards, moisture of basin was dry before and wet afterwards, location of pillow was on the bed before and in the washer afterwards, cleanness of pillow cover was dirty before and laundered afterwards, cleanness of cushion cover was dirty before and laundered afterwards\n###\n"}
{"prompt": "Attach the soft brush attachment to the vacuum cleaner. If there are stains on any of the pillows or cushions, these should be treated with spot cleaning focused just on the stain: If you cannot remove a stain using the method suggested previously, you could try laundering a cushion or pillow that has a removable cover. Finished. Now, what happens?\n", "completion": "cleanness of pillow was dirty before and clean afterwards, cleanness of cushion was dirty before and clean afterwards, smell of pillowcase was smelly before and pleasant smelling afterwards, dryness of pillow was wet before and dry afterwards, dryness of cushion was wet before and dry afterwards, fullness of wash basin was full before and empty afterwards, color of pillow was darker before and lighter afterwards\n###\n"}
{"prompt": "Form a bight in the middle of a rope. Now, what happens?\n", "completion": "shape of rope was straight before and dipping down in the middle afterwards, position of rope was straight before and bent afterwards, state of rope was one length before and divided in half by the bight afterwards, shape of rope was straight before and looped afterwards, tension of rope was loose before and taut afterwards, flexibility of rope was taut before and loose afterwards, shape of rope was straight before and knotted afterwards\n###\n"}
{"prompt": "Form a bight in the middle of a rope. Bring the top loop down over the bottom loop, folding it at the junction between the two loops. Now, what happens?\n", "completion": "location of top loop was above bottom loop before and below bottom loop afterwards, location of loop was at top before and at bottom afterwards, shape of rope was unfolded before and folded afterwards, organization of loops was separate before and joined afterwards, shape of rope was straight before and knotted afterwards\n###\n"}
{"prompt": "Form a bight in the middle of a rope. Bring the top loop down over the bottom loop, folding it at the junction between the two loops. Take the farthest edge of the bottom loop from the first loop and bring that through the second (smaller) loop. Now, what happens?\n", "completion": "shape of rope was unlooped before and looped afterwards, location of bottom loop was on the bottom before and through the second loop afterwards, position of loop was on the farthest side before and pulled through other loop afterwards\n###\n"}
{"prompt": "Form a bight in the middle of a rope. Bring the top loop down over the bottom loop, folding it at the junction between the two loops. Take the farthest edge of the bottom loop from the first loop and bring that through the second (smaller) loop. Tighten all the way. Now, what happens?\n", "completion": "tightness of rope was loose before and tight afterwards, flexibility of rope was loose before and tight afterwards, strength of knot was loose before and tight afterwards, tension of rope was loose before and taut afterwards, state of knot was nonexistent before and existing afterwards, length of rope was longer in length before and shorter because of knots afterwards\n###\n"}
{"prompt": "Take a moment to search yourself before creating your fighting style. Now, what happens?\n", "completion": "perception of senses was projected outward on content before and inward on fighting style afterwards, state of being of self was reading before and thinking afterwards, self-discovery of yourself was uncertain before and certain afterwards, state of fighting style was uncreated before and created afterwards, knowledge of style was undefined before and defined afterwards, state of yourself was unsearched before and searched afterwards, mental activity of concentration was unfocused before and focused on martial art style afterwards, thoughts of thoughts was on other things before and on marital fighting style afterwards\n###\n"}
{"prompt": "Take a moment to search yourself before creating your fighting style. Get a willing sparring partner, preferably of similar ability and similar size. Now, what happens?\n", "completion": "state of sparring partner was unwilling before and willing afterwards, preparededness of learner was unequipped with fighting gear before and obtained gear afterwards, availability of partner was undiscovered before and found afterwards, placement of sparring partner was somewhere other than with learner before and joining learner afterwards, group size of learner was alone before and with another person afterwards, activity of learner was inactive before and searching afterwards, state of partner was absent before and enlisted afterwards, size of size was unsimilar before and similar afterwards\n###\n"}
{"prompt": "Take a moment to search yourself before creating your fighting style. Get a willing sparring partner, preferably of similar ability and similar size. Begin molding your personal fighting style. Now, what happens?\n", "completion": "physical state of learner was sedentary before and active afterwards, state of style was undefined before and defined afterwards, complexity of fighting style was impersonal before and personal afterwards, knowledge of learner was ignorant of fighting style before and educated afterwards, strength of learner was weaker before and stronger afterwards, ability of learner was untrained in style before and developed skill in fighting style afterwards, identity of fighting style was nebulous before and defined afterwards\n###\n"}
{"prompt": "Take a moment to search yourself before creating your fighting style. Get a willing sparring partner, preferably of similar ability and similar size. Begin molding your personal fighting style. Apply a moral to be perfectly confident in your fighting style. Now, what happens?\n", "completion": "emotions of learner was in turmoil before and calm afterwards, mental state of learner was secular before and spiritual afterwards, strength of confidence was lacking before and found afterwards, state of moral was unapplied before and applied afterwards, growth of confidence was lacking before and attained afterwards, state of confidence was lacking before and high afterwards\n###\n"}
{"prompt": "Bend over slightly and hold frisbee in your hand, horizontal to the ground, at the height of the dog&#x27;s mouth. Now, what happens?\n", "completion": "There will be no change.\n###\n"}
{"prompt": "Bend over slightly and hold frisbee in your hand, horizontal to the ground, at the height of the dog&#x27;s mouth. Teach running and grabbing. Now, what happens?\n", "completion": "There will be no change.\n###\n"}
{"prompt": "Bend over slightly and hold frisbee in your hand, horizontal to the ground, at the height of the dog&#x27;s mouth. Teach running and grabbing. Teach jumping and grabbing. Now, what happens?\n", "completion": "There will be no change.\n###\n"}
{"prompt": "Bend over slightly and hold frisbee in your hand, horizontal to the ground, at the height of the dog&#x27;s mouth. Teach running and grabbing. Teach jumping and grabbing. Advance to the steps above for older dogs. Now, what happens?\n", "completion": "There will be no change.\n###\n"}
{"prompt": "Look for smooth, white skin. Now, what happens?\n", "completion": "color of fennel was yellow/dark before and white afterwards, state of fennel was unselected before and selected afterwards, state of fennel was green before and smooth and white afterwards, cleanness of fennel was yellowing before and white/clean afterwards\n###\n"}
{"prompt": "Look for smooth, white skin. Choose firm, young fennel for roasting. Now, what happens?\n", "completion": "temperature of fennel was cool before and hot afterwards, state of fennel was raw before and roasted afterwards, texture of fennel was tough before and tender afterwards, knowledge of fennel was unselected before and selected afterwards, state of hand was empty before and squeezing the fennel afterwards\n###\n"}
{"prompt": "Look for smooth, white skin. Choose firm, young fennel for roasting. The rest of the bulb is edible but if you find that the outer pieces of the bulb are stringy, simply remove them. Now, what happens?\n", "completion": "texture of bulb was stringy before and tender afterwards, shape of fennel was long before and short afterwards, location of out pieces was on fennel before and removed afterwards, state of fennel was whole before and trimmed afterwards, size of fennel was whole before and trimmed afterwards, shape of fennel was whole before and without outer pieces afterwards\n###\n"}
{"prompt": "Look for smooth, white skin. Choose firm, young fennel for roasting. The rest of the bulb is edible but if you find that the outer pieces of the bulb are stringy, simply remove them. Keep it wrapped in the vegetable crisper for up to a week. Now, what happens?\n", "completion": "location of fennel was on the kitchen counter before and in the fridge crisper afterwards, state of fennel was open before and sealed afterwards, temperature of bulb was room temperature before and cool afterwards, temperature of fennel was warm before and cool afterwards, state of fennel was bare before and wrapped afterwards, state of bulb was unwrapped before and wrapped afterwards, volume of fridge was empty before and full afterwards, location of fennel was in kitchen before and in fridge afterwards\n###\n"}
{"prompt": "First, you will need to gather all of the required supplies. Now, what happens?\n", "completion": "availability of bat was absent before and present afterwards, position of supplies was scattered before and gathered afterwards, availability of rope was absent before and present afterwards, organization of supplies was dispersed before and consolidated afterwards, knowledge of baseball familiarity was absent before and present afterwards, availability of whiffle ball was absent before and present afterwards, possesion of you was without supplies before and now possessing all supplies afterwards\n###\n"}
{"prompt": "First, you will need to gather all of the required supplies. Next you will string the balls through the rope so that they are able to slide easily across the rope. Now, what happens?\n", "completion": "location of ball was at end of rope before and in middle of rope afterwards, organization of balls was loose before and attached afterwards, fullness of rope was empty before and holding balls afterwards, state of the string and balls was separated before and now joined afterwards, position of balls was on ground before and strung afterwards, location of rope was separate from ball before and through a slot in the ball afterwards, organization of rope was loose before and attached afterwards\n###\n"}
{"prompt": "First, you will need to gather all of the required supplies. Next you will string the balls through the rope so that they are able to slide easily across the rope. Tie both ends of the rope around a tree or pole and make sure the line is pulled tight. Now, what happens?\n", "completion": "location of pole was absent before and present afterwards, position of rope was free before and tied afterwards, distance of distance from pole was long before and short afterwards, tightness of rope was loose before and tight afterwards, state of end of string was untied before and tied together afterwards, placement of the rope was separate from tree before and now tied around the tree afterwards, location of rope was on groun before and around tree afterwards, state of the rope was loose before and now tight afterwards, freeness of tree was free before and tied up afterwards, organization of rope was loose before and tied afterwards, orientation of string and ball was horizontal before and vertical afterwards, tightness of rope was slace before and taut afterwards\n###\n"}
{"prompt": "First, you will need to gather all of the required supplies. Next you will string the balls through the rope so that they are able to slide easily across the rope. Tie both ends of the rope around a tree or pole and make sure the line is pulled tight. Practice batting. Now, what happens?\n", "completion": "state of you was waiting to practice before and now practicing afterwards, distance of feel was together before and 2 feet apart afterwards, location of hands was off bat before and on bat handle afterwards, location of bat was on ground before and in hand afterwards, ability of you was chasing after balls before and now able to practice without chasing balls afterwards, state of eyes was looking forward before and on the ball afterwards\n###\n"}
{"prompt": "Use your non-dominant hand to grab the bottom of the stick, while grabbing the other end of the stick with your dominant hand somewhere near the middle of the shaft. Now, what happens?\n", "completion": "altitude of nondominant hand was below waist before and above waist afterwards, location of non-dominant hand was elsewhere before and on the bottom of the stick afterwards, position of non-dominant hand was empty before and holding bottom of stick afterwards, usage of stick was unused before and held afterwards, location of stick was on the ground before and in the hands afterwards, shape of elbow joints was extended before and flexed afterwards, position of dominant hand was empty before and holding middle of stick afterwards, location of stick was away from hands before and held afterwards, fullness of hand was empty before and holding stick afterwards, tension of arm muscles was relaxed before and taut afterwards, location of dominant hand was elsewhere before and in the middle of the shaft afterwards, shape of fingers was straight before and curved afterwards\n###\n"}
{"prompt": "Use your non-dominant hand to grab the bottom of the stick, while grabbing the other end of the stick with your dominant hand somewhere near the middle of the shaft. Place a ball in your Lacrosse stick as you set the shaft of the stick over your right shoulder. Now, what happens?\n", "completion": "location of ball was away from stick before and in stick afterwards, fullness of lacrosse stick was empty before and holding ball afterwards, location of ball was on ground before and in basket of lacrosse stick afterwards, distance of dominant hand was far from right shoulder before and close to right shoulder afterwards, location of stick was forward in the hands before and over the right shoulder afterwards, location of basket of lacrosse stick was in front of head before and behind head afterwards, location of stick was away from shoulder before and on shoulder afterwards, location of ball was in hand before and in stick afterwards, location of ball was elsewhere before and in the net of the stick afterwards, fullness of net was empty before and full afterwards, location of lacrosse stick was on ground before and over right shoulder afterwards\n###\n"}
{"prompt": "Use your non-dominant hand to grab the bottom of the stick, while grabbing the other end of the stick with your dominant hand somewhere near the middle of the shaft. Place a ball in your Lacrosse stick as you set the shaft of the stick over your right shoulder. Grab the middle of the shaft of your Lacrosse stick with your dominant hand, but keep it at the same angle, now that the stick is balanced. Now, what happens?\n", "completion": "location of dominant hand was farther from basket of lacrosse stick before and closer to basket of lacrosse stick afterwards, location of dominant hand was elsewhere on the stick before and in the middle of the stick afterwards, state of angle of stick was unset before and set afterwards, usage of lacrosse stick was unheld before and held afterwards, state of sick was unbalanced before and balance afterwards, balance of lacrosse stick was unbalanced before and balanced afterwards, balance of stick was unbalanced before and balanced afterwards, fullness of dominant hand was empty before and holding stick afterwards\n###\n"}
{"prompt": "Use your non-dominant hand to grab the bottom of the stick, while grabbing the other end of the stick with your dominant hand somewhere near the middle of the shaft. Place a ball in your Lacrosse stick as you set the shaft of the stick over your right shoulder. Grab the middle of the shaft of your Lacrosse stick with your dominant hand, but keep it at the same angle, now that the stick is balanced. Give a long enough push/pull to toss the ball to the other player on your team.Pull the stick with your non-dominant hand and push with your dominant hand. Now, what happens?\n", "completion": "movement of hands/arms was stationary before and moving forward afterwards, motion of ball was stationary before and moving afterwards, motion of dominant hand was stationary before and moving afterwards, location of ball was behind head before and in front of head afterwards, location of ball was in the net before and out of the net afterwards, activity of dominant hand was holding the stick before and pushing the stick afterwards, position of stick was still before and flung afterwards, activity of non-dominant hand was holding the stick before and pulling the stick afterwards, position of non-dominant hand was still before and pushing afterwards, speed of ball was still before and pushed afterwards, speed of hand was still before and throwing afterwards, location of other player was elsewhere before and close to the person afterwards\n###\n"}
{"prompt": "Have a watch on news. Now, what happens?\n", "completion": "state of a watch was needed before and set afterwards, electric conductivity of radio was turned off before and turned on afterwards, state of news channel was off before and on afterwards, state of tv was off before and on afterwards, electric conductivity of tv was turned off before and turned on afterwards, tv of tv was off before and on the news afterwards\n###\n"}
{"prompt": "Have a watch on news. Now comes the most important part. Now, what happens?\n", "completion": "state of your kit was without food before and now with food afterwards, weight of your kit was lighter before and heavier afterwards\n###\n"}
{"prompt": "Have a watch on news. Now comes the most important part. Don&#x27;t forget these items with your essentials: Now, what happens?\n", "completion": "state of your kit was without a phone before and with a phone afterwards, weight of your kit was lighter before and heavier afterwards, location of the phone was elsewhere before and in your kit afterwards\n###\n"}
{"prompt": "Have a watch on news. Now comes the most important part. Don&#x27;t forget these items with your essentials: Have emergency numbers. Now, what happens?\n", "completion": "numbers of emergency numbers was is on paper before and entered into phone afterwards, state of emergency numbers was being collected before and written down afterwards, location of notebook was in a drawer before and on the table afterwards, state of emergency numbers was unwritten before and written down afterwards, location of pen was in the drawer before and on the table afterwards, state of you phone was needing emergency numbers stored before and now containing emergency numbers afterwards\n###\n"}
{"prompt": "Select your favourite herbs and flowers. Now, what happens?\n", "completion": "location of herb was in the garden before and in the house afterwards, location of your flowers was elsewhere before and gathered afterwards, state of flower was attached to roots before and cut from roots afterwards, size of flowers was attached to plant before and cut from stem afterwards, location of flower was in the garden before and in the house afterwards, location of flowers was in the garden before and in the hand afterwards, location of your herbs was elsewhere before and gathered afterwards, state of scissors was static before and cutting the flowers afterwards, location of person was inside before and outside afterwards\n###\n"}
{"prompt": "Select your favourite herbs and flowers. Place the flower or flowers in the centre of the arrangement. Now, what happens?\n", "completion": "location of the flowers was outside the arrangement before and in the centre of the arrangement afterwards, location of flowers was in the hand before and in the center of the arrangement on the table afterwards, orientation of hands was empty before and holding flowers afterwards, location of flowers was in garden before and on table afterwards, color of the arrangement was with less color before and now with more color afterwards, weight of the arrangement was lighter before and heavier afterwards, location of flowers was out of the arrangement before and in the arrangement afterwards\n###\n"}
{"prompt": "Select your favourite herbs and flowers. Place the flower or flowers in the centre of the arrangement. Use a rubber band to tie everything together at the top of the stems. Now, what happens?\n", "completion": "elasticity of rubber band was small before and stretched out afterwards, width of the stems was loosely held together before and tightly held together afterwards, weight of the arrangement was lighter before and heavier afterwards, state of the stems was loose before and tied afterwards, state of stems was bare before and are tied afterwards, location of rubber band was in drawer before and around the plants afterwards, state of rubber band was new before and used afterwards\n###\n"}
{"prompt": "Select your favourite herbs and flowers. Place the flower or flowers in the centre of the arrangement. Use a rubber band to tie everything together at the top of the stems. Tie a ribbon bow around the stem. Now, what happens?\n", "completion": "color of the arrangement was with less color before and now with more color afterwards, state of stems was ribbonless before and have a ribbon around them afterwards, weight of the arrangement was lighter before and heavier afterwards, organization of ribbon was straight before and in a bow afterwards, shape of ribbon was straight before and tied in bow afterwards, location of ribbon was in the hand before and tied around the stems afterwards, state of ribbon was in a spool before and cut from the spool afterwards, shape of the bow was more straight before and tied in a ribbon afterwards\n###\n"}
{"prompt": "Set your water to a boil in a large saucepan. Now, what happens?\n", "completion": "location of stove flame was absent before and lit in stove afterwards, size of water was low before and rising afterwards, power of stove was off before and on afterwards, volume of saucepan was empty before and filled with water afterwards, wetness of saucepan was dry before and wet with water afterwards, density of water was standing before and boiling afterwards, state of water was still before and roiling afterwards, temperature of water was cool before and heating up afterwards, temperature of stove was cool before and hot afterwards, temperature of water was room temperature before and hot afterwards, temperature of pan was cool before and hot afterwards, temperature of water was cool before and hot afterwards, container of saucepan was empty before and full of water afterwards, state of stove was off before and on afterwards\n###\n"}
{"prompt": "Set your water to a boil in a large saucepan. Then trow the water away and place it to the large saucepan and add the sugar and cream. Now, what happens?\n", "completion": "composition of water was pure before and mixed with sugar and cream afterwards, location of cream was in the fridge before and in the pan afterwards, location of sugar was outside of pan before and inside pan afterwards, wetness of sugar was dry before and wet with water afterwards, location of sugar was absent before and in saucepan afterwards, temperature of cream was cool before and warm afterwards, temperature of sugar was cool before and warm afterwards, temperature of cream and sugar was cool before and hot afterwards, odor of cream and sugar was plain smelling before and tasty smelling afterwards, location of cream was outside of pan before and inside pan afterwards, location of sugar was in a container before and in the pan afterwards, temperature of sugar was room temperature before and heating up afterwards, composition of sugar/cream/water was separate before and mixed afterwards, location of cream was in container before and in saucepan afterwards, location of water was in pot before and in sink afterwards, temperature of cream was cold before and hot afterwards\n###\n"}
{"prompt": "Set your water to a boil in a large saucepan. Then trow the water away and place it to the large saucepan and add the sugar and cream. Then place your softened ice cream and place it to the pastry bag with your star tip then swirl it to a serving cup. Now, what happens?\n", "completion": "shape of ice cream was round shaped before and flattened afterwards, location of ice cream was in saucepan before and in pastry bag afterwards, fullness of serving dish was empty before and full afterwards, weight of pastry bag was heavier before and lighter afterwards, cleanness of serving dish was clean before and dirty afterwards, container of pastry bag was empty before and full of ice cream afterwards, volume of saucepan was filled with caramel before and emptier afterwards, location of ice cream was in container before and in serving cup afterwards, temperature of caramel was hot before and cooler afterwards, location of caramel was in saucepan before and on top of ice cream afterwards, container of serving cup was empty before and full of ice cream afterwards, state of cup was empty before and full afterwards, hardness of ice cream was hard before and soft afterwards, location of ice cream was in the freezer before and in the dishes afterwards, cleanness of piping tip was clean before and dirty afterwards, location of ice cream was in container before and in pastry bag afterwards\n###\n"}
{"prompt": "Set your water to a boil in a large saucepan. Then trow the water away and place it to the large saucepan and add the sugar and cream. Then place your softened ice cream and place it to the pastry bag with your star tip then swirl it to a serving cup. Serve and enjoy! Now, what happens?\n", "completion": "temperature of ice cream was cold before and slightly warmer afterwards, location of ice cream was on table before and in eater's hands afterwards, weight of bowl was lighter before and heavier afterwards, state of sundae was being made before and served afterwards, cleanness of spoons was clean before and dirty afterwards, toppings of ice cream was plain before and topped with caramel afterwards, state of person was waiting for sundae before and enjoying sundae afterwards, temperature of caramel was warm before and cool afterwards, volume of sundae bowl was full of sundae before and less full of sundae afterwards\n###\n"}
{"prompt": "Use the teabags for making tea. Now, what happens?\n", "completion": "step of tea cup was just held water before and holding tea afterwards, temperature of tea was room temp before and hot afterwards, strength of teabags was pungent before and weak afterwards, wetness of tea bags was dry before and wet afterwards, color of water was clear before and brown afterwards, location of tea was in bag before and in cup afterwards, temperature of teabags was cool before and hot afterwards, location of tea bags was in camp bag before and in cup afterwards, wetness of tea was dry before and wet afterwards\n###\n"}
{"prompt": "Use the teabags for making tea. Squeeze the excess liquid out of the teabags after they have cooled down. Now, what happens?\n", "completion": "state of tea bag was dripping wet before and drier afterwards, temperature of teabags was hot before and cool afterwards, moisture of teabags was wet before and drier afterwards, wetness of teabag was soaked before and damp afterwards, state of teabags was filled with liquid before and dry afterwards, temperature of tea bag was hot before and cool afterwards, temperature of teabag was hot before and cool afterwards, location of liquid was in teabag before and in cup afterwards\n###\n"}
{"prompt": "Use the teabags for making tea. Squeeze the excess liquid out of the teabags after they have cooled down. Lay the teabags next to the campfire. Now, what happens?\n", "completion": "location of tea bags was away from campfire before and near campfire afterwards, moisture of teabags was wet before and dry afterwards, location of teabags was held before and near the fire afterwards, location of teabag was in hand before and near fire afterwards, temperature of teabags was cool before and warm afterwards, temperature of teabag was cool before and hot afterwards\n###\n"}
{"prompt": "Use the teabags for making tea. Squeeze the excess liquid out of the teabags after they have cooled down. Lay the teabags next to the campfire. In the morning, take the teabags and throw them into the coals to help start a new fire. Now, what happens?\n", "completion": "composition of teabags was whole before and burning afterwards, location of teabag was near fire before and in coals afterwards, location of tea bags was beside campfire before and in the campfire afterwards, burning of teabag was dry before and on fire afterwards, state of fire was out before and started afterwards, temperature of teabag was cold before and hot afterwards, temperature of teabags was cool before and hot afterwards, location of teabags was near the fire before and in the fire afterwards\n###\n"}
{"prompt": "Make good kick combinations that complement your momentum. Now, what happens?\n", "completion": "coordination of momentum was at odds with kicks before and synergistic with kicks afterwards, state of energy was potential before and kinetic afterwards, speed of fighter was stationary before and moving afterwards, technique of kick combinations was clunky before and good and complemtnary afterwards, flexibility of person was standing on both feet before and standing on one foot afterwards\n###\n"}
{"prompt": "Make good kick combinations that complement your momentum. Attack your opponent furiously for a short time then retreat backward, then repeat. Now, what happens?\n", "completion": "direction of athlete was advancing before and retreating afterwards, location of fighter was fighting furiously before and retreating afterwards, orientation of person was touching nothing before and touching another person afterwards, state of fighter was stationary before and attacking afterwards, speed of fighter was stopping again before and repeating attack afterwards, style of fighting style was unbalanced before and balanced afterwards, location of fighter was standing near person before and away from other person afterwards\n###\n"}
{"prompt": "Make good kick combinations that complement your momentum. Attack your opponent furiously for a short time then retreat backward, then repeat. Use fake kick combos. Now, what happens?\n", "completion": "orientation of fighter was stationary before and using fake combos afterwards, technique of kicking was obvious before and unpredictable afterwards, position of feet was both on the ground before and are separated afterwards\n###\n"}
{"prompt": "Make good kick combinations that complement your momentum. Attack your opponent furiously for a short time then retreat backward, then repeat. Use fake kick combos. Counter attacking a counter is usually a lot easier than countering an attack. Now, what happens?\n", "completion": "motion of fighter was being coutered before and countering the counter afterwards, orientation of person was standing in front of other person before and kicking other person afterwards, technique of counterattacking was sluggish before and fluid afterwards\n###\n"}
{"prompt": "Take your kite out of the bag, unwrap it and lay it out flat on the ground. Now, what happens?\n", "completion": "state of kite was folded before and laying flat afterwards, familiarity of kite-surfing technique was unfamiliar before and familiar afterwards, location of kite was in bag before and out of bag afterwards, organization of tape on package was sealed before and unsealed afterwards, knowledge of place to buy kite was unknown before and known afterwards, location of kite was in the bag before and out of the bag afterwards, location of kit was in store before and at home afterwards, location of kite was wrapped before and out of wrap afterwards, openness of bag was closed before and open afterwards, availability of kite was wraooed before and unwrapped afterwards, knowledge of kite surfing locations was unknown before and known afterwards, shape of kite was rolled up before and spread out afterwards, volume of bag was full before and empty afterwards, location of kite was inside bag before and on ground afterwards\n###\n"}
{"prompt": "Take your kite out of the bag, unwrap it and lay it out flat on the ground. Unroll your lines from your bar downwind and lay them on the ground. Now, what happens?\n", "completion": "state of wind direction was unknown before and from kite to you afterwards, organization of lines was rolled up before and unrolled afterwards, state of lines was rolled before and stretched out afterwards, location of lines was off the ground before and on the ground afterwards, shape of lines was coiled before and straight afterwards, state of lines was wound around bar before and unwound from bar afterwards, location of lines was on bar before and on ground afterwards, orientation of lines was wrapped before and downwind afterwards, distance of lines was near kite before and far from kite afterwards, organization of ground was clear before and occupied afterwards\n###\n"}
{"prompt": "Take your kite out of the bag, unwrap it and lay it out flat on the ground. Unroll your lines from your bar downwind and lay them on the ground. Now you are ready to attach your harness. Now, what happens?\n", "completion": "location of harness was loose before and attached afterwards, location of harness was packed away before and in hand afterwards, location of lines was away from harness before and near harness afterwards, orientation of harness was unattached before and attached afterwards, state of harness clasp was closed before and open afterwards, location of hand bar (boom) was separate from line before and attached to line afterwards\n###\n"}
{"prompt": "Take your kite out of the bag, unwrap it and lay it out flat on the ground. Unroll your lines from your bar downwind and lay them on the ground. Now you are ready to attach your harness. Launch. Now, what happens?\n", "completion": "strength of wind was weak before and strong afterwards, location of kite was on ground before and in air afterwards, location of lines was on ground before and in air afterwards, location of hands was at sides before and on bar afterwards, location of person was out of harness before and in harness afterwards, location of kite was held before and launched afterwards\n###\n"}
{"prompt": "Make sure you can do a really good back tuck on the trampoline. Now, what happens?\n", "completion": "location of person was on ground before and in air afterwards, state of spotter was in position before and out of position afterwards, knowledge of you was unsure if you could do a really good back tuck before and now sure that you can do a really good back tuck afterwards, location of you was on the trampoline edge before and in the middle afterwards, state of back was untucked before and tucked afterwards, confidence of you was uncertain before and confident afterwards, efficacy of trampoline was untested before and tested afterwards\n###\n"}
{"prompt": "Make sure you can do a really good back tuck on the trampoline. Try doing a backdrop pull-over on the trampoline. Now, what happens?\n", "completion": "state of spotter was ready before and finished afterwards, position of you was bending legs before and standing upright afterwards, state of you was on trampoline before and now doing a backdrop pull-over afterwards, motion of trampoline was flat before and reverberating afterwards, location of you was on the edge of trampoline before and in the middle afterwards\n###\n"}
{"prompt": "Make sure you can do a really good back tuck on the trampoline. Try doing a backdrop pull-over on the trampoline. Combine both of the skills. Now, what happens?\n", "completion": "state of spotter was ready before and finished afterwards, location of you was on one trampoline edge before and on the other side afterwards, movement of you was doing each skill seperately before and now combining skills afterwards, complexity of skills was uncombined before and combined afterwards, motion of trampoline was static before and vibrating afterwards, knowledge of you was unpracticed before and experienced afterwards\n###\n"}
{"prompt": "Make sure you can do a really good back tuck on the trampoline. Try doing a backdrop pull-over on the trampoline. Combine both of the skills. Try pulling your legs over faster. Now, what happens?\n", "completion": "position of legs was straight before and pulled into body afterwards, speed of you was pulling legs moderately fast before and pulling legs more quickly afterwards, knowledge of you was unadvised before and adapting afterwards, speed of legs was pulled slow before and pulled faster afterwards, location of legs was under before and over afterwards, movement of you was pulling legs over slower before and now pulling legs over faster afterwards\n###\n"}
{"prompt": "When executing a forward slip to lose altitude, power to idle, and slow the plane to 80 knots before starting the slip. Now, what happens?\n", "completion": "motion of momentum was maintained before and lost afterwards, speed of plane was fast before and slowing afterwards, power of engine was engaged fully before and idling afterwards, speed of plane was faster before and slower afterwards, speed of speed was maintained before and decreased afterwards, altitude of plane was high in the air before and falling down afterwards, speed of plane was moving before and slowed afterwards, state of power was forward before and idle afterwards, volume of engine was loud before and quieter afterwards, sound of plane was quiet before and sputtering loudly afterwards, activity of engine was engaged before and idle afterwards, elevation of plane was higher before and lower afterwards\n###\n"}
{"prompt": "When executing a forward slip to lose altitude, power to idle, and slow the plane to 80 knots before starting the slip. Pick a point far in front of you and make it your heading or target. Now, what happens?\n", "completion": "orientation of point was vague before and specific afterwards, orientation of plane was unfocused before and oriented in single direction afterwards\n###\n"}
{"prompt": "When executing a forward slip to lose altitude, power to idle, and slow the plane to 80 knots before starting the slip. Pick a point far in front of you and make it your heading or target. Bank into the wind. Now, what happens?\n", "completion": "movement of plane was going straight before and turning afterwards, trajectory of plane was moving forward before and turning afterwards, direction of plane was heading straight before and turning afterwards, depth of plane was heading forward before and turned toward wind afterwards, height of one plane wing was level with the other before and higher than the other afterwards\n###\n"}
{"prompt": "When executing a forward slip to lose altitude, power to idle, and slow the plane to 80 knots before starting the slip. Pick a point far in front of you and make it your heading or target. Bank into the wind. To recover from the slip, simultaneously release the rudder pedal and level the plane with the ailerons. Now, what happens?\n", "completion": "balance of plane was tilted before and level afterwards, elevation of plane was falling before and rising upwards afterwards, orientation of rudder pedal was in use before and released afterwards, speed of plane was slowing before and speeding up afterwards, state of pedal was depressed before and released afterwards, power of engine was disengaged before and engaged afterwards, orientation of plane was tilted before and level afterwards, sound pitch of plane was noisy before and quieting afterwards\n###\n"}
{"prompt": "Push open the quick release lever. Now, what happens?\n", "completion": "state of lever was closed before and open afterwards, orientation of release lever was closed before and open afterwards, activity of hand was relaxed before and active afterwards, location of finger was elsewhere before and on the lever afterwards, openness of lever was closed before and open afterwards\n###\n"}
{"prompt": "Push open the quick release lever. Pull the skewer straight out by pulling on the quick release lever. Now, what happens?\n", "completion": "state of skewer was in before and out afterwards, location of skewer was in the axel before and out of the apparatus afterwards, state of skewer was attached before and released afterwards, location of skewer was attached before and loose afterwards, organization of skewer was attached to lever before and pulled out afterwards\n###\n"}
{"prompt": "Push open the quick release lever. Pull the skewer straight out by pulling on the quick release lever. Lube the shaft and threads of the skewer with bearing grease. Now, what happens?\n", "completion": "wetness of shafts was dry before and lubricated afterwards, skewer of bearing grease was on finger before and on afterwards, location of grease was in the can before and on the skewer afterwards, lubrication of shaft and threads was dry before and greased afterwards, wetness of threads was dry before and lubricated afterwards, state of threads was unlubed before and lubed afterwards, cleanness of hands was clean before and dirty afterwards, texture of skewer was dry before and greased afterwards, state of shaft was unlubed before and lubed afterwards, location of grease was in can before and on skewer afterwards\n###\n"}
{"prompt": "Push open the quick release lever. Pull the skewer straight out by pulling on the quick release lever. Lube the shaft and threads of the skewer with bearing grease. Insert the skewer into the wheel with the quick release lever facing in the proper direction, which is usually the left side of the bicycle. Now, what happens?\n", "completion": "location of skewer was loose before and in wheel afterwards, location of skewer was separated from wheel before and inserted into wheel afterwards, location of skewer was outside the wheel before and inside the wheel afterwards, position of lever was facing up before and facing left afterwards, state of wheel apparatus was unfinished before and finished afterwards, placement of skewer was out of wheel before and in wheel afterwards\n###\n"}
{"prompt": "Cut a thick piece of cardboard about 6 by 6 inches (15.24 cm by 15.24 cm). Now, what happens?\n", "completion": "size of cardboard was bigger before and smaller afterwards, wholeness of carboard was whole before and cut afterwards, size of carboard was whole before and cut up afterwards, usage of scissors was closed before and cutting afterwards, composition of cardboard was uncut before and cut afterwards, size of carboard was whole before and segmented afterwards\n###\n"}
{"prompt": "Cut a thick piece of cardboard about 6 by 6 inches (15.24 cm by 15.24 cm). Open the can and mix the Bondo with a stir stick if there is a layer of liquid on top. Now, what happens?\n", "completion": "cleanness of stick was clean before and dirty afterwards, state of can was unopened before and opened afterwards, location of stick was outside of container before and inside of container afterwards, consistency of bondo was unmixed before and stirred afterwards, location of liquid was on top before and mixed in afterwards, openness of can was shut before and open afterwards, organization of layers was seperated before and mixed afterwards, state of can was closed before and open afterwards, organization of bondo was settled before and mixed afterwards, stickiness of stir stick was dry before and sticky afterwards, state of container was closed before and open afterwards, moisture of stick was dry before and wet afterwards, composition of bondo was unmixed before and mixed afterwards\n###\n"}
{"prompt": "Cut a thick piece of cardboard about 6 by 6 inches (15.24 cm by 15.24 cm). Open the can and mix the Bondo with a stir stick if there is a layer of liquid on top. Add 1 line of hardener--also known as a catalyst or fixing agent--by squeezing it out of the tube across the top of the Bondo filler. Now, what happens?\n", "completion": "hardness of bondo was soft before and hardened afterwards, shape of tube was unsqueezed before and squeezed afterwards, location of hardener was in tube before and in bondo afterwards, catalyzation of bondo was inert before and catalyzed afterwards, location of catalyst was in tube before and on bondo afterwards, location of hardener was in tube before and outside of tube afterwards, shape of tube was smooth before and squeezed afterwards, organization of ingredients was seperate before and mixed afterwards, state of bondo was liquid before and solid afterwards, moisture of catalyst was wet before and dry afterwards, location of tuber was on counter before and over bondo can afterwards, moisture of bondo was wet before and dry afterwards, location of hardener was in tube before and on cardboard afterwards\n###\n"}
{"prompt": "Cut a thick piece of cardboard about 6 by 6 inches (15.24 cm by 15.24 cm). Open the can and mix the Bondo with a stir stick if there is a layer of liquid on top. Add 1 line of hardener--also known as a catalyst or fixing agent--by squeezing it out of the tube across the top of the Bondo filler. Use an ice cream novelty stick or a plastic spreader to quickly mix the two substances together. Now, what happens?\n", "completion": "stickiness of spreader was dry before and sticky afterwards, cleanness of stick was clean before and dirty afterwards, consistency of substances was unmixed before and mixed afterwards, organization of ingredients was seperate before and combined afterwards, location of substances was separate before and together afterwards, moisture of stick was dry before and wet afterwards, texture of stick was smooth before and sticky afterwards, composition of substances was unmixed before and mixed afterwards\n###\n"}
{"prompt": "Find an online load board. Now, what happens?\n", "completion": "power of computer was relaxed before and active afterwards, electric conductivity of screen was turned off before and turned on afterwards, knowledge of brain was curious before and satisfied afterwards, electric conductivity of computer was turned off before and turned on afterwards, knowledge of load board was unidentified before and identified afterwards, state of search engine was closed before and opened afterwards, state of load board was unfound before and found afterwards, step of board was unfound before and found afterwards, volume of search bar was empty before and filled afterwards, state of fingers was starting to type before and still afterwards\n###\n"}
{"prompt": "Find an online load board. Sign up for the load board. Now, what happens?\n", "completion": "state of password was non-existent before and created afterwards, volume of customers information was blank on load board site before and full on load board site afterwards, state of account was non-existent before and created afterwards, volume of bank account was full before and less full afterwards, location of credit card was in wallet before and out of wallet afterwards, step of board was unsigned for before and signed for afterwards, state of account was unregistered before and registered afterwards\n###\n"}
{"prompt": "Find an online load board. Sign up for the load board. Post your truck to the load board. Now, what happens?\n", "completion": "placement of truck was away from load board before and at load board afterwards, state of item post was non-existent before and uploaded afterwards, state of truck was low reputation before and more popular afterwards, state of truck was unposted before and posted afterwards, volume of website information page was empty before and full afterwards, volume of customers was choosing from trucks before and choosing for more trucks afterwards\n###\n"}
{"prompt": "Find an online load board. Sign up for the load board. Post your truck to the load board. Search for loads. Now, what happens?\n", "completion": "state of loads was unsearched before and searched afterwards, state of computer was quite before and thinking afterwards, state of individual searching was doing their job before and doing another task at their job afterwards, state of search was entered before and performed afterwards, step of loads was unknown before and known afterwards\n###\n"}
{"prompt": "Cut a raw potato in half. Now, what happens?\n", "completion": "shape of potato was whole before and cut in half afterwards, state of potato was whole before and in half afterwards, wholeness of potato was whole before and halved afterwards, number of potato was one piece before and two pieces afterwards, wetness of knife was dry before and moist afterwards, location of potato was elsewhere before and on the cutting board afterwards, composition of potato was whole before and halved afterwards, cleanness of knife was clean before and dirty afterwards, cleanness of hands was clean before and dirty afterwards, state of knife was clean before and dirty afterwards, wetness of knife was dry before and wet afterwards\n###\n"}
{"prompt": "Cut a raw potato in half. Rub the cut side of one half potato on the window. Now, what happens?\n", "completion": "clarity of window was foggy before and clear afterwards, wetness of window was dry before and wet afterwards, location of potato was on the cutting board before and on the window afterwards, cleanness of potato was uncontaminated before and contaminated afterwards, cleanness of window was clean before and dirty afterwards, location of potato was on cutting board before and on window afterwards, placement of window was untouched by potato before and now touched by potato afterwards, wetness of window was dry before and damp afterwards\n###\n"}
{"prompt": "Cut a raw potato in half. Rub the cut side of one half potato on the window. Use the other half of the potato if needed. Now, what happens?\n", "completion": "location of other half of potato was on the cutting board before and on the window afterwards, cleanness of window was dirtier before and cleaner afterwards\n###\n"}
{"prompt": "Cut a raw potato in half. Rub the cut side of one half potato on the window. Use the other half of the potato if needed. Leave to dry without touching. Now, what happens?\n", "completion": "dryness of potato starch was moist on windshield before and dry on the windshield afterwards, state of window was wet before and now drying afterwards, location of hands was near the window before and far from the window afterwards, wetness of window was wet before and dry afterwards, state of window was likely to dog before and less likely to fog afterwards, dampness of window was wet before and dry afterwards, location of potato was on the window before and in the compost afterwards\n###\n"}
{"prompt": "Assemble the items needed. Now, what happens?\n", "completion": "location of tools was in storage before and on site afterwards, location of items was in their place before and assembled afterwards, location of items was scattered before and assembled afterwards, items of items needed was unassembled before and assembled afterwards\n###\n"}
{"prompt": "Assemble the items needed. Slacken the centre nut first by backing it off by a few turns but leaving it in place. Now, what happens?\n", "completion": "tightness of nut was tight before and slackened afterwards, position of nut was untouched before and rotated afterwards, tightness of centre nut was on steering wheel before and loose from steering column afterwards, orientation of centre nut was tight before and loose afterwards, centre nut of centre nut was tight before and slackened afterwards\n###\n"}
{"prompt": "Assemble the items needed. Slacken the centre nut first by backing it off by a few turns but leaving it in place. Insert the ratchet as shown in the image. Now, what happens?\n", "completion": "usage of ratchet was unused before and inserted afterwards, location of ratchet was in toolbox before and atop steering wheel afterwards, orientation of ratchet was loose before and connected to steering wheel afterwards, location of ratchet was in it's place before and inserted afterwards, rachet placement of rachet was on counter before and inserted afterwards\n###\n"}
{"prompt": "Assemble the items needed. Slacken the centre nut first by backing it off by a few turns but leaving it in place. Insert the ratchet as shown in the image. Remove the wheel. Now, what happens?\n", "completion": "location of wheel was intact before and removed afterwards, location of wheel was in place before and removed afterwards, orientation of wheel was connected to column before and loose afterwards, location of wheel was on column before and in work area afterwards\n###\n"}
{"prompt": "Make sure your car is on level ground with the hand brake on. Now, what happens?\n", "completion": "location of hand brake was elevated before and depressed afterwards, location of car was elsewhere before and on flat ground afterwards, state of brakes was engaged before and disengaged afterwards, state of car was moving before and still afterwards, position of hand brake was down before and up afterwards, movement of car was parked before and in motion afterwards, state of hand brake was activated before and deactivated afterwards, engagement of hand brake was off before and on afterwards, engagement of hand brake was disengaged before and engaged afterwards\n###\n"}
{"prompt": "Make sure your car is on level ground with the hand brake on. Get out a 20p. Now, what happens?\n", "completion": "fullness of pocket was holding 20p before and empty afterwards, location of 20p was elsewhere before and in the hand afterwards, location of 20p was in pocket before and in hand afterwards\n###\n"}
{"prompt": "Make sure your car is on level ground with the hand brake on. Get out a 20p. Place the 20p flat in one of the grooves of the tread. Now, what happens?\n", "completion": "location of 20p was in pocket before and in tread afterwards, location of 20p was in the hand before and in one of the grooves afterwards, orientation of 20p was horizontally held before and vertically held afterwards, location of 20p was touching hand before and touching hand and tire afterwards, composition of grooves was bare before and covered afterwards, fullness of grooves was less full before and more full afterwards\n###\n"}
{"prompt": "Make sure your car is on level ground with the hand brake on. Get out a 20p. Place the 20p flat in one of the grooves of the tread. Have an idea what the tyre should look,like. Now, what happens?\n", "completion": "experience of person was novice before and experienced afterwards\n###\n"}
{"prompt": "######Choose a suitable location. Now, what happens?\n", "completion": "moisture of seeds was dry before and damp afterwards, location of water was in hose before and in soil afterwards, location of location was unchosen before and chosen afterwards, location of seeds was in package before and in soil afterwards, knowledge of location was undetermined before and selected afterwards, location of trellis was in shop before and in garden afterwards\n###\n"}
{"prompt": "######Choose a suitable location. All coral peas require good draining soil. Now, what happens?\n", "completion": "location of hoe was in shed before and in garden afterwards, moisture of soil was wet before and dry afterwards\n###\n"}
{"prompt": "######Choose a suitable location. All coral peas require good draining soil. If you&#x27;re going to grow the coral pea as a climber, it will need support. Now, what happens?\n", "completion": "state of climber was unsupported before and supported afterwards, location of trellis was in shop before and in ground afterwards, support of coral peas was unsupported before and supported afterwards\n###\n"}
{"prompt": "######Choose a suitable location. All coral peas require good draining soil. If you&#x27;re going to grow the coral pea as a climber, it will need support. ######Water well while establishing. Now, what happens?\n", "completion": "moisture of seeds was dry before and damp afterwards, wetness of peas was unwatered before and watered afterwards, location of water was in hose before and in soil afterwards, moisture of soil was dry before and damp afterwards, location of water was in reservoir before and in home afterwards, state of seeds was dormant before and established afterwards, wetness of peas was dry before and watered afterwards\n###\n"}
{"prompt": "Draw a line down the middle of the playing space. Now, what happens?\n", "completion": "shape of chalk was brand new before and worn down afterwards, organization of space was whole before and divided afterwards, organization of playing space was conintuous before and divided afterwards, appearance of ground was unmarked before and drawn on afterwards, space of space was undivided before and separated with line afterwards, location of chalk was on stick before and on ground afterwards, composition of soil surface was entire before and marked with line afterwards\n###\n"}
{"prompt": "Draw a line down the middle of the playing space. Divide the players into two parties and stand one party on either side of the line. Now, what happens?\n", "completion": "composition of players was all grouped together before and divided into teams afterwards, organization of teams was undefined before and organized afterwards, attitude of people was friendly before and competitive afterwards, organization of group of people was united before and divided afterwards, knowledge of players was unprepared before and prepared afterwards, players/teams of players was standing together before and divided on either side of line afterwards\n###\n"}
{"prompt": "Draw a line down the middle of the playing space. Divide the players into two parties and stand one party on either side of the line. The game starts on a signal and consists of catching hold of an opponent by any part of his body (hand, foot, arm or leg) and pulling the player across the boundary line. Now, what happens?\n", "completion": "orientation of team members was solitary before and touching afterwards, state of game was on hold before and in play afterwards, power of team members was stationary before and moving afterwards, form of clothing was in good shape before and stretched out afterwards, location of team members was on opposite sides before and moving away and toward each other afterwards, form of chalk line on ground was pristine before and smudged afterwards, form of arms was unharmed before and injured afterwards\n###\n"}
{"prompt": "Draw a line down the middle of the playing space. Divide the players into two parties and stand one party on either side of the line. The game starts on a signal and consists of catching hold of an opponent by any part of his body (hand, foot, arm or leg) and pulling the player across the boundary line. Select the winning team. Now, what happens?\n", "completion": "organization of teams was playing before and selected as winners and losers afterwards, knowledge of winner was undeclared before and declared afterwards\n###\n"}
{"prompt": "Using a wet cloth, clean up the urine spot and make sure the area is thoroughly damp without being wet. Now, what happens?\n", "completion": "smell of cloth was neutral before and smelly afterwards, urine spot of urine spot was on floor before and cleaned with wet cloth afterwards, state of cloth was sanitary before and unsanitary afterwards, wetness of stain was dry before and damp afterwards, location of urine was on bed before and on cloth afterwards, concentration of urine was concentrated before and diluted afterwards, cleanness of cloth was clean before and dirty afterwards, composition of urine was fresh before and sopped afterwards, location of cloth was in hand before and on stain afterwards, moisture of cloth was dry before and wet afterwards\n###\n"}
{"prompt": "Using a wet cloth, clean up the urine spot and make sure the area is thoroughly damp without being wet. Sprinkle a thick layer of baking soda over the location. Now, what happens?\n", "completion": "location of baking soda was in box before and on mattress afterwards, location of baking soda was in container before and on bed afterwards, location of location was wet from cloth before and sprinkled with baking soda afterwards, location of baking soda was in box before and on stain afterwards, odor of baking soda was fresh smelling before and stinky afterwards, location of urine was in mattress before and in baking soda afterwards, fullness of box was full before and emptier afterwards, moisture of baking soda was dry before and moist afterwards, shape of baking soda was in package before and sprinkled afterwards, moisture of baking soda was dry before and wet afterwards, location of stain was in mattress before and absorbed afterwards\n###\n"}
{"prompt": "Using a wet cloth, clean up the urine spot and make sure the area is thoroughly damp without being wet. Sprinkle a thick layer of baking soda over the location. Allow it to sit for a while. Now, what happens?\n", "completion": "There will be no change.\n###\n"}
{"prompt": "Using a wet cloth, clean up the urine spot and make sure the area is thoroughly damp without being wet. Sprinkle a thick layer of baking soda over the location. Allow it to sit for a while. Once dry, vacuum it off of the bed. Now, what happens?\n", "completion": "usage of vacuum was off before and on afterwards, shape of baking soda was loose before and vacuumed tightly afterwards, cleanness of bed was cluttered before and clean afterwards, wetness of stain was damp before and dry afterwards, moisture of bed was damp before and dry afterwards, wetness of baking soda was wet before and dry afterwards, location of baking soda was on bed before and in vacuum afterwards, visibility of stain was visible before and invisible afterwards, location of baking soda was on bed before and off bed afterwards, moisture of mattress was wet before and dry afterwards, baking soda of baking soda was on bed before and vacuumed off afterwards, location of baking soda was on mattress before and in vaccum afterwards, fullness of vacuum was empty before and full afterwards\n###\n"}
{"prompt": "Look for what looks like a hide. Now, what happens?\n", "completion": "There will be no change.\n###\n"}
{"prompt": "Look for what looks like a hide. Look for the leather bobbing beneath (pine) trees where dropbears have resided. Now, what happens?\n", "completion": "knowledge of leather was unseen before and spotted afterwards\n###\n"}
{"prompt": "Look for what looks like a hide. Look for the leather bobbing beneath (pine) trees where dropbears have resided. Look for leather wherever donkeys roam (they spawn wherever carrots grow). Now, what happens?\n", "completion": "state of leather was unspawned before and spawned afterwards, state of carrots was ungrown before and grown afterwards\n###\n"}
{"prompt": "Look for what looks like a hide. Look for the leather bobbing beneath (pine) trees where dropbears have resided. Look for leather wherever donkeys roam (they spawn wherever carrots grow). Collect by tapping on the leather. Now, what happens?\n", "completion": "availability of leather was on map before and in inventory afterwards, state of leather was untapped before and tapped afterwards\n###\n"}
{"prompt": "Turn on oven to 375 °F (191 °C). Now, what happens?\n", "completion": "state of oven was off before and on afterwards, temperature of oven was cold before and hotter afterwards, position of knob was off before and on afterwards, smell of kitchen was smelling clean before and smelling like an oven afterwards, temperature of oven heating element was off before and lit afterwards, position of dial was turned to 0 before and turned to 375 afterwards, temperature of oven interior was cold before and hot afterwards, orientation of oven knob was in the off position before and in the on position afterwards, temperature of oven was cold before and hot afterwards, electric conductivity of oven was off before and on afterwards\n###\n"}
{"prompt": "Turn on oven to 375 °F (191 °C). Add the egg whites and vanilla. Now, what happens?\n", "completion": "cleanness of spoon was clean before and dirty afterwards, moisture of bowl was dry before and wet afterwards, location of egg whites was in the eggs before and in the bowl afterwards, composition of egg whiites was separate before and combined afterwards, location of vanilla was in bottle before and in bowl afterwards, location of egg whites was in shell before and in bowl afterwards, organization of ingredients was seperate before and combined afterwards, cleanness of mixing spoon was clean before and dirty afterwards, location of vanilla was in the bottle before and in the bowl afterwards, location of egg whites was in a cup before and in the mixing bowl afterwards, fullness of bowl was empty before and partway full afterwards, cleanness of bowl was clean before and dirty afterwards\n###\n"}
{"prompt": "Turn on oven to 375 °F (191 °C). Add the egg whites and vanilla. Drop dough by rounded teaspoons 2 inches (5.1 cm) apart on ungreased cookie sheet. Now, what happens?\n", "completion": "location of dough was in the bowl before and on the pan afterwards, volume of cookie sheet was empty before and full afterwards, cleanness of teaspoon was clean before and dirty afterwards, organization of dough was all together before and separated afterwards, size of dough was together before and balled up afterwards, fullness of cookie sheet was empty before and full afterwards, location of dough was in the bowl before and on the cookie sheet afterwards, fullness of cookie sheet was empty before and full of cookies afterwards, location of dough was in bowl before and on sheet afterwards, cleanness of cookie sheet was clean before and dirty afterwards\n###\n"}
{"prompt": "Turn on oven to 375 °F (191 °C). Add the egg whites and vanilla. Drop dough by rounded teaspoons 2 inches (5.1 cm) apart on ungreased cookie sheet. Finished. Now, what happens?\n", "completion": "temperature of cookie sheet was cold before and hot afterwards, temperature of cookie dough was cold before and hot afterwards, composition of cookies was raw before and cooked afterwards\n###\n"}
{"prompt": "Obtain a pumice stone. Now, what happens?\n", "completion": "possession of the person was looking for a pumice stone before and in possession of the pumice stone afterwards, location of pumice stone was in store before and in home afterwards, location of the pumice stone was on the ground before and in possession of a person afterwards, ownership of pumice stone was in store before and owne afterwards\n###\n"}
{"prompt": "Obtain a pumice stone. Place it in a shallow bowl of water for a minute to allow it soak up the water. Now, what happens?\n", "completion": "weight of bowl was light before and heavy afterwards, volume of bowl was empty before and full afterwards, moisture of stone was dry before and wet afterwards, composition of the bowl was empty before and filled with water afterwards, density of the water was undisturbed before and being soaked up afterwards, weight of stone was light before and heavy afterwards, location of stone was on counter before and in bowl afterwards, location of water was in bowl before and in stone afterwards, wetness of stone was dry before and wet afterwards, wetness of the pumice stone was dry before and wet afterwards, location of the pumice stone was above water level before and submerged in water afterwards\n###\n"}
{"prompt": "Obtain a pumice stone. Place it in a shallow bowl of water for a minute to allow it soak up the water. Rub the wet stone across the stain or around a circular stain. Now, what happens?\n", "completion": "cleanness of the sink was stained before and being cleaned afterwards, movement of stone was sitting before and rubbing afterwards, wetness of stain was dry before and wet afterwards, moisture of stain was dry before and wet afterwards, fullness of hand was emtpy before and holding stone afterwards, location of stone was in bowl before and on sink afterwards, location of the pumice stone was in a bowl before and on the sink afterwards, depth of the stain was attached to the sink before and coming out of the sink afterwards, location of stone was in bowl before and on stain afterwards, visibility of stain was visible before and removed afterwards, state of stain was visible before and removed afterwards\n###\n"}
{"prompt": "Obtain a pumice stone. Place it in a shallow bowl of water for a minute to allow it soak up the water. Rub the wet stone across the stain or around a circular stain. Wipe off any grit. Now, what happens?\n", "completion": "cleanness of towel was clean before and dirty afterwards, location of grit was on stain before and on towel afterwards, cleanness of stain was dirty before and cleaner afterwards, location of grit was on surface before and on rag afterwards, cleanness of the sink was left with grit before and completely clean afterwards, wetness of towel was dry before and wet afterwards, state of grit was on sink before and removed afterwards\n###\n"}
{"prompt": "Name your character something cool. Now, what happens?\n", "completion": "identity of character was anonymous before and named afterwards, state of the character was unamed before and now named afterwards, complexity of name was boring before and exciting afterwards, naming of penguin was nameless before and named afterwards, familiarity of name was generic before and unique afterwards\n###\n"}
{"prompt": "Name your character something cool. Make your character look awesome. Now, what happens?\n", "completion": "look of character was lame looking before and cool looking afterwards, cleanness of character was messy before and clean afterwards, state of the character was plain before and now awesome afterwards, size of character was small before and large afterwards, color of costume was dull before and colorful afterwards, decoration of character was generic before and personalized afterwards, looks of character was ugly before and good looking afterwards\n###\n"}
{"prompt": "Name your character something cool. Make your character look awesome. Be interesting and informative in chat. Now, what happens?\n", "completion": "state of you was being dull in chat before and now being interesting in chat afterwards, disposition of player was dull in chat before and helpful in chat afterwards, sound pitch of character was quiet before and loud afterwards, knowledge of character was ignorant before and knowledgeable afterwards\n###\n"}
{"prompt": "Name your character something cool. Make your character look awesome. Be interesting and informative in chat. Be nice. Now, what happens?\n", "completion": "behavior of you was possibly being inconsiderate before and now being nice afterwards, availability of character was selfish before and generous afterwards, disposition of person was mean before and nice afterwards, familiarity of character was indifferent before and helpful afterwards\n###\n"}
{"prompt": "Gather all the 5 ingredients. Now, what happens?\n", "completion": "fulness of countertop was bare before and full afterwards, orientation of ingredient containers was closed before and open afterwards, location of ingredients was in the cupboard before and on the counter afterwards, fulness of cupboards was full before and emptier afterwards, fullness of counter was empty before and covered in ingredients afterwards, organization of ingredients was scattered about before and gathered together afterwards, position of ingredients was in cupboard before and gathered afterwards\n###\n"}
{"prompt": "Gather all the 5 ingredients. Combine all of them in a bowl and mix well. Now, what happens?\n", "completion": "organization of ingredients was separated before and mixed afterwards, location of ingredients was on the counter before and in the bowl afterwards, fullness of measuring spoon was empty before and half filled afterwards, composition of spices was separated before and mixed afterwards, location of ingredients was on counter before and in bowl afterwards, fulness of bowl was empty before and full afterwards, volume of bowl was empty before and full afterwards, composition of ingredients was separate before and mixed afterwards, fullness of bowl was empty before and full afterwards, cleanness of spoon was clean before and dirty afterwards, cleanness of bowl was clean before and dirty afterwards, location of bowl was in the cupboard before and on the counter afterwards\n###\n"}
{"prompt": "Gather all the 5 ingredients. Combine all of them in a bowl and mix well. Store in an airtight container. Now, what happens?\n", "completion": "fulness of container was empty before and full afterwards, fullness of container was empty before and full afterwards, cleanness of airtight container was clean before and dirty afterwards, sealing of seeds was exposed to air before and airtight afterwards, fullness of bowl was full before and empty afterwards, location of ingredients was in the mixing bowl before and in the container afterwards, location of lid was off container before and on container afterwards, location of mixture was in the bowl before and in the airtight container afterwards, location of ingredients was in bowl before and in container afterwards, openness of container was open before and sealed afterwards, location of lid was detached before and attached afterwards, fullness of airtight container was empty before and full afterwards\n###\n"}
{"prompt": "Gather all the 5 ingredients. Combine all of them in a bowl and mix well. Store in an airtight container. Use. Now, what happens?\n", "completion": "state of ingredients was raw before and cooked afterwards, openness of airtight container was closed before and open afterwards, fullness of airtight container was full before and less full afterwards, temperature of cooking pan was cold before and hot afterwards, fullness of pan was empty before and full afterwards, fullness of stomach was less full before and more full afterwards, state of mixture was unused before and used afterwards, location of ingredients was in the container before and in the cooking pan afterwards, temperature of seeds was cold before and warm afterwards, temperature of ingredients was cold before and hot afterwards, moisture of seeds was dry before and oily afterwards\n###\n"}
{"prompt": "Select a sturdy and good quality coat hanger. Now, what happens?\n", "completion": "location of coat hanger was in closet before and in hand afterwards, ownership of coat hanger was elsewhere before and selected afterwards\n###\n"}
{"prompt": "Select a sturdy and good quality coat hanger. Choose a hanging spot. Now, what happens?\n", "completion": "organization of closet was clothes storage before and selected reading storage afterwards, location of coat hanger was in hand before and in closet afterwards\n###\n"}
{"prompt": "Select a sturdy and good quality coat hanger. Choose a hanging spot. Place the reading material on the coat hanger. Now, what happens?\n", "completion": "composition of magazine pages was closed before and slightly open in the middle afterwards, location of reading material was in hand before and on coat hanger afterwards, availability of coat hanger was empty before and occupied by magazine afterwards, state of reading material was laying down before and suspended afterwards, location of magazine was on shelf before and on coat hanger afterwards, reading material of reading material was in water before and placed on hanger afterwards, weight of coat hanger was light weight before and heavier afterwards, usage of coat hanger was empty before and used afterwards\n###\n"}
{"prompt": "Select a sturdy and good quality coat hanger. Choose a hanging spot. Place the reading material on the coat hanger. Hang in place. Now, what happens?\n", "completion": "location of coat hanger was in hand before and hung up afterwards, orientation of magazine was lying horizontally before and lying vertically afterwards, state of reading material was laying down before and suspended afterwards, orientation of coat hanger was on flat surface before and hanging afterwards, hanger placement of hanger was in hand before and hung in place afterwards\n###\n"}
{"prompt": "Draw the big W############ Now, what happens?\n", "completion": "state of hand was empty before and holding a pen afterwards, state of black marker was new before and used afterwards, state of fabric was blank before and marked up afterwards, activity of hand was relaxed before and active afterwards, color of page was blank before and covered in a black w afterwards, state of letter w was absent before and present afterwards\n###\n"}
{"prompt": "Draw the big W############ Draw the small W############ Now, what happens?\n", "completion": "fullness of page was less full before and more full afterwards, color of page was less black before and more black afterwards, state of fabric was blank before and marked up afterwards\n###\n"}
{"prompt": "Draw the big W############ Draw the small W############ Underline it with a red marker############ Now, what happens?\n", "completion": "location of ink was in pen before and on paper afterwards, color of page was black and white before and black and white and red afterwards, state of fabric was blank before and marked up afterwards, state of letter w was plain before and underlined afterwards, fullness of page was less full of color before and more full of color afterwards, activity of red marker was unused before and active afterwards, state of hand was holding a black pen before and holding a red marker afterwards\n###\n"}
{"prompt": "Draw the big W############ Draw the small W############ Underline it with a red marker############ There&#x27;s the WWE logo. Now, what happens?\n", "completion": "There will be no change.\n###\n"}
{"prompt": "Wipe Wipe away any loose dirt, toothpaste, food particles, etc, with a rag or wet paper towel. Now, what happens?\n", "completion": "state of faucet was clean before and dirty afterwards, cleanliness of faucet was dirty before and clean afterwards, location of loose dirt was on faucet before and on rag afterwards, cleanness of faucet was dirty before and clean afterwards, reflectivity of faucet was dull before and shiny afterwards, cleanness of faucet was unwiped before and wiped afterwards, availability of sink was in use before and available afterwards, moisture of paper towel was dry before and wet afterwards, cleanness of paper towel was clean before and dirty afterwards, location of toothpaste was on faucet before and on rag afterwards, dryness of rag was dry before and wet afterwards, location of food particles was on faucet before and on rag afterwards, cleanness of rag was clean before and dirty afterwards, location of loose dirt was on faucet before and removed afterwards, location of rag was in drawer before and in hand afterwards\n###\n"}
{"prompt": "Wipe Wipe away any loose dirt, toothpaste, food particles, etc, with a rag or wet paper towel. Scrub Scrub off any stuck on gook with a cleaning toothbrush, sponge, or rag. Now, what happens?\n", "completion": "cleanness of sponge was clean before and dirty afterwards, location of stuck on gook was on faucet before and on sponge afterwards, location of sponge was unavailable before and obtained afterwards, cleanness of faucet was dirty before and clean afterwards, reflectivity of faucet was dull before and shiny afterwards, location of gook was on faucet before and in drain afterwards, location of sponge was under sink before and in hand afterwards, dryness of sponge was dry before and wet afterwards, cleanness of toothbrush was clean before and dirty afterwards, location of brush was unavailable before and obtained afterwards, availability of cleaning rag was unavailable before and obtained afterwards, cleanliness of toothbrush was clean before and dirty afterwards, location of stuck on gook was on faucet before and off faucet afterwards, location of gook was on faucet before and on toothbrush afterwards\n###\n"}
{"prompt": "Wipe Wipe away any loose dirt, toothpaste, food particles, etc, with a rag or wet paper towel. Scrub Scrub off any stuck on gook with a cleaning toothbrush, sponge, or rag. Wipe off all the grime you just scrubbed off. Now, what happens?\n", "completion": "location of grime was on faucet before and on sponge afterwards, cleanliness of faucet was dirty before and clean afterwards, cleanliness of paper towel was clean before and dirty afterwards, wetness of paper towel was dry before and wet afterwards, location of grime was on faucet before and on paper towel afterwards, location of grime was in sink before and in drain afterwards, location of grime was on faucet before and on faucet afterwards\n###\n"}
{"prompt": "Wipe Wipe away any loose dirt, toothpaste, food particles, etc, with a rag or wet paper towel. Scrub Scrub off any stuck on gook with a cleaning toothbrush, sponge, or rag. Wipe off all the grime you just scrubbed off. Polish Wet the faucet with a quick splash of water, then take a dry paper towel and wipe until dry and spotless. Now, what happens?\n", "completion": "dryness of paper towel was dry before and damp afterwards, state of faucet was dry before and wet afterwards, cleanness of chrome was unwiped before and wiped afterwards, location of paper towel was on roll before and in hand afterwards, cleanliness of paper towel was clean before and dirty afterwards, cleanliness of faucet was spotty before and clean afterwards, location of water was in faucet before and in sink afterwards, moisture of paper towel was dry before and wet afterwards, light reflectivity of faucet was dull before and shiny afterwards, wetness of paper towel was dry before and wet afterwards, state of faucet was spotted before and gleaming afterwards, wetness of faucet was dry before and wet afterwards, location of water was in pipes before and in sink drain afterwards, availability of paper towel was unavailable before and available afterwards, state of paper towel was wet before and dry afterwards\n###\n"}
{"prompt": "In your best handwriting, write the letters &quot;d&quot; and &quot;o.&quot; Now, what happens?\n", "completion": "location of pen was in drawer before and in hand afterwards, location of ink was in pen before and on paper afterwards, state of paper was blank before and written on afterwards, moisture of paper was dry before and wet afterwards, empitness of the paper was blank before and written on afterwards, state of letter d was absent before and present afterwards, state of pen was unused before and used afterwards, color of paper was blank before and colored afterwards, state of paper was blank before and drawn on afterwards, cleanness of paper was clean before and marked up afterwards, activity of hand was dormant before and active afterwards, appearance of the color was uniform before and multiple afterwards\n###\n"}
{"prompt": "In your best handwriting, write the letters &quot;d&quot; and &quot;o.&quot; Draw in your &quot;J.&quot; Now, what happens?\n", "completion": "location of ink was in pen before and on paper afterwards, moisture of paper was dry before and wet afterwards, state of paper was blank before and written on afterwards, quantity of the number of words was even before and odd afterwards, state of letter j was absent before and present afterwards, size of the letters was similar sized before and multiple sizes afterwards, color of paper was less colored before and more colored afterwards, meaning of the word was comprehensible before and nonsense afterwards\n###\n"}
{"prompt": "In your best handwriting, write the letters &quot;d&quot; and &quot;o.&quot; Draw in your &quot;J.&quot; Finish with the &quot;ob,&quot; in lowercase, spaced just as evenly and the &quot;do&quot; was. Now, what happens?\n", "completion": "location of ink was in pen before and on paper afterwards, state of paper was blank before and written on afterwards, organization of the letters was unbalanced before and balanced afterwards, state of letter b was absent before and present afterwards, state of letters was imaginary before and real afterwards, quantity of the letter 'o' was unique before and duplicated afterwards, orientation of the small letters was directional before and palindomric afterwards, color of paper was less colored before and more colored afterwards\n###\n"}
{"prompt": "In your best handwriting, write the letters &quot;d&quot; and &quot;o.&quot; Draw in your &quot;J.&quot; Finish with the &quot;ob,&quot; in lowercase, spaced just as evenly and the &quot;do&quot; was. Flesh out your do-Job man. Now, what happens?\n", "completion": "location of ink was in pen before and on paper afterwards, state of image was incomplete before and complete afterwards, shape of shape on paper was letters before and like a man afterwards, meaning of the jottings was letters before and an image afterwards, meaning of the markings was verbal before and representational afterwards, color of paper was less colored before and more colored afterwards\n###\n"}
{"prompt": "Fill the teapot with very hot water. Now, what happens?\n", "completion": "temperature of teapot was cold before and warm afterwards, temperature of teapot was cool before and hot afterwards, fullness of teapot was empty before and full afterwards, volume of teapot was empty before and full of hot water afterwards, weight of teapot was light before and heavy afterwards, volume of teapot was empty before and full afterwards, location of water was in faucet before and in teapot afterwards, location of water was in kettle before and in teapot afterwards, temperature of teapot was cold before and hot afterwards, location of water was in faucet before and in pot afterwards\n###\n"}
{"prompt": "Fill the teapot with very hot water. Swirl the water around the teapot to ensure that all surfaces have been warmed. Now, what happens?\n", "completion": "temperature of surfaces was neutral before and warmed afterwards, temperature of teapot was cold before and warm afterwards, temperature of surfaces was cold before and hot afterwards, stability of water was still before and swirling afterwards, location of water was inside kettle before and inside pot afterwards, moisture of teapot was dry before and wet afterwards, volume of teapot was empty before and full afterwards, speed of water was still before and swirled afterwards, moisture of surfaces was dry before and wet afterwards, movement of water was still before and swirling afterwards\n###\n"}
{"prompt": "Fill the teapot with very hot water. Swirl the water around the teapot to ensure that all surfaces have been warmed. Pour it out just before you intend pouring in the tea. Now, what happens?\n", "completion": "weight of teapot was heavy before and light afterwards, temperature of teapot was cold before and warm afterwards, volume of teapot was full before and emptied afterwards, moisture of sink was dry before and wet afterwards, location of water was in teapot before and in sink afterwards, fullness of teapot was full before and empty afterwards, location of water was in teapot before and in drain afterwards, volume of teapot was full before and empty afterwards, location of water was in teapot before and outside teapot afterwards, location of tea was in kettle before and in teapot afterwards\n###\n"}
{"prompt": "Fill the teapot with very hot water. Swirl the water around the teapot to ensure that all surfaces have been warmed. Pour it out just before you intend pouring in the tea. Relax and enjoy your tea. Now, what happens?\n", "completion": "location of tea was in pot before and in cup afterwards, volume of cup was empty before and full afterwards, moisture of cup was dry before and wet afterwards\n###\n"}
{"prompt": "Find a suitable location. Now, what happens?\n", "completion": "There will be no change.\n###\n"}
{"prompt": "Find a suitable location. Plant in a container pot. Now, what happens?\n", "completion": "location of seeds was in a package before and in a pot of soil afterwards, composition of soil was seedless before and seeded afterwards, state of seeds was in open before and covered afterwards, location of seeds was in packet before and in pot, soil afterwards, volume of pot was empty before and full afterwards, cleanness of pot was clean before and dirty afterwards, location of lily was in ground before and in pot afterwards, state of container pot was empty before and containing a plant afterwards, weight of pot was light before and heavy afterwards, cleanness of seeds was clean before and dirty afterwards\n###\n"}
{"prompt": "Find a suitable location. Plant in a container pot. Water frequently during hot weather. Now, what happens?\n", "completion": "temperature of soil was hot before and cooler afterwards, location of water was in faucet before and in soil afterwards, location of water was in it's dispenser before and on the plant afterwards, moisture of soil was dry before and wet afterwards, moisture of seeds was dry before and wet afterwards, moisture of soil was dehyrated before and hydrated afterwards, moisture of roots was dry before and wet afterwards, state of plant was dehydrated before and hydrated afterwards, location of water was in a cup before and in the soil afterwards\n###\n"}
{"prompt": "Find a suitable location. Plant in a container pot. Water frequently during hot weather. Nourish using liquid fertiliser every month during the warm months. Now, what happens?\n", "completion": "state of soil was nutrient poor before and nutrient rich afterwards, moisture of soil was dry before and damp afterwards, location of liquid was in soil before and in plant afterwards, strength of soil was normal before and enriched/amended afterwards, location of liquid fertilizer was in it's container before and on the plant afterwards, dryness of soil was dry before and wet afterwards, location of fertilizer was in bottle before and in soil afterwards, state of soil was unfertilized before and fertilized afterwards, location of liquid fertilizer was in bottle before and on plants afterwards, location of fertilizer was inside a bottle before and in the soil afterwards, state of plant was lacking nutrients before and nourished afterwards\n###\n"}
{"prompt": "Purchase a large postal/poster tube. Now, what happens?\n", "completion": "location of poster tube was at the store before and in the house afterwards, location of tube was in store before and at home afterwards, location of person was at the store before and at their house afterwards, fullness of cash register was less full before and more full afterwards, location of money was in the wallet before and in the cash register afterwards, location of money was in wallet before and in cashier's drawer afterwards\n###\n"}
{"prompt": "Purchase a large postal/poster tube. Roll the fusible webbing to slightly smaller size than the mouth of the postal/poster tube. Now, what happens?\n", "completion": "size of the poster tube was more narrow than the webbing roll before and wider than the webbing roll afterwards, size of the webbing was larger before and smaller afterwards, location of fusible webbing was in the closet before and in the hands afterwards, fullness of closet was more full before and less full afterwards, density of webbing was loose before and compressed afterwards, cleanness of hands was clean before and covered in residue afterwards, shape of fusible webbing was straight before and rolled up in a tube afterwards, shape of fusible webbing was compact before and distended afterwards, orientation of webbing was flat before and rolled afterwards, position of webbing was unrolled before and rolled afterwards\n###\n"}
{"prompt": "Purchase a large postal/poster tube. Roll the fusible webbing to slightly smaller size than the mouth of the postal/poster tube. Pop the fusible webbing into the tube. Now, what happens?\n", "completion": "location of fusible webbing was loose before and trapped in tube afterwards, visibility of fusible webbing was visible before and invisible afterwards, location of fusible webbing was out of the tube before and in the tube afterwards, fullness of hands was full of webbing before and full of tube afterwards, fullness of tube was empty before and full of fusible webbing afterwards, weight of tube was light before and heavy afterwards, location of lid was on the tube before and off of the tube afterwards, density of webbing was loose before and compressed afterwards, location of webbing was outside the tube before and inside the tube afterwards, wrapping of webbing roll was unpackaged before and packaged afterwards, fullness of tube was empty before and full afterwards, volume of tuble was empty before and full afterwards\n###\n"}
{"prompt": "Purchase a large postal/poster tube. Roll the fusible webbing to slightly smaller size than the mouth of the postal/poster tube. Pop the fusible webbing into the tube. Label the tube and put away with your other sewing supplies. Now, what happens?\n", "completion": "location of tube was out in the open before and put away afterwards, knowledge of tube was unmarked before and labeled afterwards, location of lid was off the tube before and on the tube afterwards, location of fusible webbing was loose before and contained afterwards, location of label sticker was on the sticker sheet before and on the tube afterwards, color of tube was unmarked before and labeled afterwards, location of webbing was out of storage before and in storage afterwards, state of tube was unlabelled before and labelled afterwards, color of label sticker was blank before and written on afterwards, fullness of sewing supplies area was less full before and more full afterwards\n###\n"}
{"prompt": "Fill the hurricane glass with ice cubes. Now, what happens?\n", "completion": "temperature of ice cubes was in freezer before and in room afterwards, location of ice cubes was in freezer before and in glass afterwards, container of glass was empty before and filled with some ice afterwards, wetness of water was liquid before and solid afterwards, fullness of glass was empty before and full afterwards, container of glass was empty before and filled with ice cubes afterwards, volume of glass was empty before and full afterwards, container of ice was in the ice container before and in the glass afterwards, temperature of glass was room temperature before and cold afterwards\n###\n"}
{"prompt": "Fill the hurricane glass with ice cubes. Measure and pour the liquor into the hurricane glass in this order: Now, what happens?\n", "completion": "measurement of liquor was unmeasured before and measured afterwards, location of liquor was in measuring cup before and in glass afterwards, weight of glass was light before and heavier afterwards, color of glass was clear before and red afterwards, container of liquor was in the bottle before and in the glass afterwards, volume of glass was filled with ice cubes before and filled with ice cubes and liquor afterwards, fullness of bottle was full before and empty afterwards, temperature of liquor was warm before and cooling over ice afterwards, cleanness of measuring cup was clean before and dirty afterwards, temperature of liquor was room temperature before and cold afterwards, location of liquor was in bottle before and in glass afterwards, weight of glass was heavy before and heavier afterwards\n###\n"}
{"prompt": "Fill the hurricane glass with ice cubes. Measure and pour the liquor into the hurricane glass in this order: Cut a wedge in the orange slice and slide it on the side of the glass as a garnish. Now, what happens?\n", "completion": "wetness of orange slice was dry on its surface before and wet from liquor afterwards, state of glass rim was clear before and garnished afterwards, wholeness of orange was whole before and cut afterwards, location of orange slice was on cutting board before and on edge of glass afterwards, container of orange slice was on the cutting board before and in the glass afterwards, shape of orange was complete and round before and cut into thin slices afterwards, location of orange wedge was in orange before and on glass afterwards, decoration of glass was plain before and garnished afterwards, size of orange was whole before and sliced afterwards, wetness of knife was dry before and wet afterwards\n###\n"}
{"prompt": "Fill the hurricane glass with ice cubes. Measure and pour the liquor into the hurricane glass in this order: Cut a wedge in the orange slice and slide it on the side of the glass as a garnish. Finished. Now, what happens?\n", "completion": "container of glass was empty before and filled afterwards, availability of cocktail was absent before and prepared afterwards\n###\n"}
{"prompt": "Dissolve a packet of Epsom salts into a tub of cold water. Now, what happens?\n", "completion": "ingredients of tub was only water before and now a mixture afterwards, fullness of container was full before and partially full afterwards, volume of tub was empty before and full afterwards, state of epsom salts was solid before and dissolved afterwards, moisture of epsom salts was dry before and wet afterwards, wetness of tub was dry before and wet afterwards, clarity of water was clear before and cloudy afterwards, openness of container was closed before and open afterwards, state of epsom salts was whole before and dissolved afterwards, weight of tub was lighter before and heavier afterwards, moisture of epsom salt was dry before and wet afterwards, complexity of water was pure before and a solution afterwards\n###\n"}
{"prompt": "Dissolve a packet of Epsom salts into a tub of cold water. Rinse the silk item in the Epsom salts and water mixture. Now, what happens?\n", "completion": "state of silk item was dry before and rinsed afterwards, dryness of silk item was dry before and wet afterwards, location of epsom salts was in water before and in fabric afterwards, moisture of silk was dry before and wet afterwards, state of color was transient before and set afterwards, location of wate was in tub before and in fabric afterwards, location of item was outside basin before and inside basin afterwards\n###\n"}
{"prompt": "Dissolve a packet of Epsom salts into a tub of cold water. Rinse the silk item in the Epsom salts and water mixture. Wash the item separately in warm water for its first wash. Now, what happens?\n", "completion": "cleanness of item was dirty before and washed afterwards, temperature of silk was cold before and warm afterwards, temperature of water was cold before and warm afterwards, temperature of item was cool before and warm afterwards, state of silk was virgin before and washed afterwards, cleanness of item was partially clean before and fully clean afterwards\n###\n"}
{"prompt": "Dissolve a packet of Epsom salts into a tub of cold water. Rinse the silk item in the Epsom salts and water mixture. Wash the item separately in warm water for its first wash. Finished. Now, what happens?\n", "completion": "cleanness of item was dirty before and clean afterwards, state of task was incomplete before and finished afterwards, freshness of item was stale before and fresh afterwards, step of dye was temporary before and set afterwards\n###\n"}
{"prompt": "Find yourself a sturdy piece of bamboo. Now, what happens?\n", "completion": "state of bamboo was planted before and cut afterwards, location of bamboo was elsewhere before and in the hand afterwards, amount of person hands was empty before and full afterwards\n###\n"}
{"prompt": "Find yourself a sturdy piece of bamboo. Once you have your bamboo, sand or cut off any twigs or bumps. Now, what happens?\n", "completion": "texture of bamboo edges was rough before and smooth afterwards, location of bumps was on the bamboo before and off the bamboo afterwards, cleanliness of ground was clear before and twig covered afterwards, location of twigs was on the bamboo before and off the bamboo afterwards, location of twig was on bamboo before and on ground afterwards, newness of sandpaper was new before and used afterwards, texture of bamboo was bumpy before and level afterwards, cleanness of knife was clean before and dirty afterwards, texture of bumpa was present before and absent afterwards, state of knife was sharp before and dull afterwards, texture of bamboo was bumpy before and smooth afterwards\n###\n"}
{"prompt": "Find yourself a sturdy piece of bamboo. Once you have your bamboo, sand or cut off any twigs or bumps. Try walking around with the piece of bamboo. Now, what happens?\n", "completion": "movement of person was standing before and walking afterwards, cleanness of bottom end of bamboo was clean before and dirty afterwards, location of bamboo was on the counter before and on the ground afterwards\n###\n"}
{"prompt": "Find yourself a sturdy piece of bamboo. Once you have your bamboo, sand or cut off any twigs or bumps. Try walking around with the piece of bamboo. Decorate. Now, what happens?\n", "completion": "location of adornments was on table before and on bamboo afterwards, color of bamboo was only yellow or brown before and many colors afterwards, organization of bamboo was plain before and decorated afterwards, appearance of bamboo was plain before and decorated afterwards, decoration of bamboo was plain before and decorated afterwards, cleanness of table was covered with adornments before and clear afterwards, cosmetic s of bamboo was plain before and adorned afterwards\n###\n"}
{"prompt": "Spread peanut butter all over one side of a pretzel. Now, what happens?\n", "completion": "location of peanut butter was in a container before and on the pretzel afterwards, cleanliness of knife was clean before and dirty afterwards, taste of pretzel was savory before and sweet afterwards, texture of pretezel was dry before and sticky afterwards, texture of knife was dry before and sticky afterwards, toppings of pretzel was plain before and topped with peanut butter afterwards, location of peanut butter was in jar before and on pretzel afterwards, cleanness of knife was clean before and dirty afterwards, location of peanut butter was off pretzel before and on pretzel afterwards, toppings of pretzel was plain before and covered afterwards\n###\n"}
{"prompt": "Spread peanut butter all over one side of a pretzel. Hold the peanut butter-covered pretzel in one hand by its sides, and stick your choice of a very small food item (raisins, chocolate chips, etc. Now, what happens?\n", "completion": "toppings of pretzel was empty before and covered afterwards, dampness of chocolate chips was dry before and wet with peanut butter afterwards, location of food items was off pretzel before and on pretzel afterwards, decoration of pretzel was undecorated before and decorated afterwards, location of chocolate chips was in bowl before and on pretzel afterwards, sweetness of pretzel was sweet before and sweeter afterwards, location of raisins was in bowl before and on pretzel afterwards, location of chocolate chips was off of the pretzel before and on the pretzel afterwards, location of chocolate chips was in the bag before and on the pretzel afterwards\n###\n"}
{"prompt": "Spread peanut butter all over one side of a pretzel. Hold the peanut butter-covered pretzel in one hand by its sides, and stick your choice of a very small food item (raisins, chocolate chips, etc. Repeat spreading peanut butter and adding raisins, etc. Now, what happens?\n", "completion": "location of food items was off pretzel before and on pretzel afterwards, location of peanut butter was in the jar before and on the pretzel afterwards, location of peanut butter was off pretzel before and on pretzel afterwards, location of chocolate chips was in the bag before and on the pretzel afterwards\n###\n"}
{"prompt": "Spread peanut butter all over one side of a pretzel. Hold the peanut butter-covered pretzel in one hand by its sides, and stick your choice of a very small food item (raisins, chocolate chips, etc. Repeat spreading peanut butter and adding raisins, etc. Place the pretzels, decoratively, on a plate for a party or for other guests to enjoy eating. Now, what happens?\n", "completion": "cleanness of plate was clean before and dirty afterwards, appearance of pretzels was plain before and decorated afterwards, location of pretzels was in hand before and on the plate afterwards, coverage of plate was empty before and full afterwards, organization of pretzels was loose before and on plate afterwards, cleanliness of plate was clean before and dirty afterwards, location of pretzels was off plate before and on plate afterwards, volume of plate was empty before and full afterwards\n###\n"}
{"prompt": "Chisel a small shaving that is parallel to the grain of the wood. Now, what happens?\n", "completion": "wholeness of wood was intact before and shaved afterwards, state of divet was absent before and created afterwards, state of chisel was unused before and used afterwards, state of hand was empty before and full afterwards, state of wood was solid before and chiseled afterwards, shape of sliver was connected before and apart afterwards, location of chisel was touching nothing before and touching wood afterwards, visibility of nail was visible before and invisible afterwards, shape of wood was whole before and shaved afterwards\n###\n"}
{"prompt": "Chisel a small shaving that is parallel to the grain of the wood. Make sure to leave one end of the shaving still attached to the surface of the wood. Now, what happens?\n", "completion": "state of shaving was absent before and created afterwards, state of wood was completely whole before and slightly attached afterwards\n###\n"}
{"prompt": "Chisel a small shaving that is parallel to the grain of the wood. Make sure to leave one end of the shaving still attached to the surface of the wood. Put the nail in. Now, what happens?\n", "completion": "location of nail was shelved before and fastened afterwards, connection of wood was solid before and nailed afterwards, state of wood was without a nail before and nailed afterwards, organization of nail was unattached before and attached afterwards, location of nail was on table before and in wood afterwards\n###\n"}
{"prompt": "Chisel a small shaving that is parallel to the grain of the wood. Make sure to leave one end of the shaving still attached to the surface of the wood. Put the nail in. Fix the attached shaving back in place with a wood suitable adhesive. Now, what happens?\n", "completion": "stickiness of wood was dry before and sticky afterwards, location of glue was in bottle before and on wood afterwards, location of glue was in bottle before and on the wood afterwards, state of adhesive was liquid before and solid afterwards, location of adhesive was stored before and on wood afterwards, composition of shaving was peeled before and glued afterwards, location of adhesive was in tube before and on wood afterwards, hardness of adhesive was soft before and hard afterwards, organization of shaving was loose before and glued down afterwards, visibility of nail was exposed before and concealed afterwards, position of shaving was unattached before and glued afterwards\n###\n"}
{"prompt": "Clean your fossils thoroughly. Now, what happens?\n", "completion": "state of your fossils was dirty before and now clean afterwards, cleanness of fossils was dirty before and clean afterwards\n###\n"}
{"prompt": "Clean your fossils thoroughly. Earn lots of money. Now, what happens?\n", "completion": "wealth of player was poor before and rich afterwards, fullness of bank account was empty before and full afterwards, possesion of you was short on money before and now loaded with money afterwards\n###\n"}
{"prompt": "Clean your fossils thoroughly. Earn lots of money. The better your vivosaurs are, the better chance you will win a fossil rock. Now, what happens?\n", "completion": "awareness of you was unaware about improving your vivosaurs before and now aware afterwards\n###\n"}
{"prompt": "Clean your fossils thoroughly. Earn lots of money. The better your vivosaurs are, the better chance you will win a fossil rock. Become a master fighter. Now, what happens?\n", "completion": "knowledge of player was inexperienced before and experienced afterwards, ability of you was a novice fighter before and now a master fighter afterwards\n###\n"}
{"prompt": "Gather all ingredients listed above. Now, what happens?\n", "completion": "location of ingredients was in their place before and gathered afterwards, location of plate was in a cabinet before and on a table afterwards, ingredients needed of ingredients was ungathered before and gathered afterwards, location of graham cracker was in a box before and on plate afterwards, organization of ingredients was scattered before and assembled afterwards, location of peanut butter was in a cabinet before and on a table afterwards, state of table was clear before and full afterwards\n###\n"}
{"prompt": "Gather all ingredients listed above. Break or slice the Graham cracker in half. Now, what happens?\n", "completion": "wholeness of graham cracker was whole before and broken or sliced in half afterwards, state of graham cracker was whole before and broken afterwards, graham cracker of graham cracker was whole before and broke in half afterwards, size of cracker was whole before and in half afterwards\n###\n"}
{"prompt": "Gather all ingredients listed above. Break or slice the Graham cracker in half. Spread the peanut butter on the Graham cracker with a plastic knife. Now, what happens?\n", "completion": "location of peanut butter was in jar before and on graham cracker afterwards, state of graham cracker was plain before and topped with peanut butter afterwards, state of graham cracker was uncovered before and covered in peanut butter afterwards, peanut butter of peanut butter was in jar before and spread on cracker afterwards, cleanness of plastic knife was clean before and dirty afterwards, texture of knife was dry before and sticky afterwards, weight of peanut butter container was heavy before and lighter afterwards, location of peanut butter was in container before and spread on cracker afterwards, location of peanut butter was in jar before and on cracker afterwards, cleanness of knife was clean before and dirty afterwards\n###\n"}
{"prompt": "Gather all ingredients listed above. Break or slice the Graham cracker in half. Spread the peanut butter on the Graham cracker with a plastic knife. Carefully drop or place some mini chocolate chips on the Graham cracker. Now, what happens?\n", "completion": "location of candies was on plate before and on graham cracker afterwards, chocolate chips of chocolate chips was in bag before and dropped on peanut butter afterwards, location of chocolate chips was in bag before and on cracker afterwards, location of chocolate chips was in their container before and on the graham cracker afterwards, state of graham cracker was free of chocolate chips before and covered with chocolate chips afterwards\n###\n"}
{"prompt": "Locate the stained item and lay it out in readiness. Now, what happens?\n", "completion": "position of stain was hidden before and exposed afterwards, location of item was in hamper before and on table afterwards, shape of stained item was crumpled before and flat afterwards, orientation of shirt was wadded before and flat afterwards, shape of item was crumpled before and flat afterwards\n###\n"}
{"prompt": "Locate the stained item and lay it out in readiness. Dab or spray undiluted white vinegar to the area of the cola stain. Now, what happens?\n", "completion": "location of vinegar was in bottle before and on cloth afterwards, location of cola was on stained item before and on rag afterwards, wetness of stain was dry before and wet afterwards, moisture of stain was dry before and wet afterwards, location of vinegar was in bottle before and on stained item afterwards, organization of stain was condensed before and diluted afterwards, location of vinegar was in bottle before and on stain afterwards, orientation of vinegar was bottled before and layered on stain afterwards, location of vinegar was on shelf before and on shirt afterwards, form of vinegar was bottled before and sprayed afterwards, dryness of rag was dry before and damp afterwards, moisture of cloth was dry before and wet afterwards\n###\n"}
{"prompt": "Locate the stained item and lay it out in readiness. Dab or spray undiluted white vinegar to the area of the cola stain. Leave the item to sit for 24 hours. Now, what happens?\n", "completion": "wetness of item was wet before and dry afterwards, moisture of stain was wet before and dry afterwards, state of stain was set before and loosened afterwards, date of calendar date was yesterday before and today afterwards, moisture of cloth was wet before and dry afterwards\n###\n"}
{"prompt": "Locate the stained item and lay it out in readiness. Dab or spray undiluted white vinegar to the area of the cola stain. Leave the item to sit for 24 hours. Wash the garment as usual. Now, what happens?\n", "completion": "dampness of shirt was dry before and wet afterwards, state of washer was turned off before and turned on afterwards, location of shirt was on counter before and in washing machine afterwards, location of water was in pipes before and in sink afterwards, cleanness of garment was dirty before and cleaned afterwards, moisture of garment was dry before and wet afterwards, composition of shirt was wet before and dry afterwards, location of garment was on table before and in washing machine afterwards, location of cola was on stained item before and in water afterwards, location of vinegar was in garment before and in washer afterwards, cleanness of garment was dirty before and clean afterwards, location of laundry detergent was in jug before and in sink afterwards, state of shirt was dirty before and washing afterwards, location of vinegar was on stained item before and in sink afterwards\n###\n"}
{"prompt": "Lay a thin piece of paper or a clean handkerchief over the stamps. Now, what happens?\n", "completion": "location of paper was on table before and on stamps afterwards, covering of stamps was uncovered before and covered afterwards, location of stamps was uncovered before and covered by paper afterwards, location of handkerchief was in pocket before and on top of letter afterwards, form of stamps was uncovered before and covered afterwards, visibility of stamp was uncovered before and covered afterwards\n###\n"}
{"prompt": "Lay a thin piece of paper or a clean handkerchief over the stamps. Set the iron to hot. Now, what happens?\n", "completion": "temperature of stamp was cool before and hot afterwards, temperature of iron was cold before and hot afterwards, usage of iron was off before and on afterwards, temperature of iron was cool before and hot afterwards, temperature of cloth was cool before and hot afterwards, usability of iron was off before and on afterwards, state of iron was off before and on afterwards\n###\n"}
{"prompt": "Lay a thin piece of paper or a clean handkerchief over the stamps. Set the iron to hot. Remove the paper and carefully tease apart the stamps using stamp tweezers. Now, what happens?\n", "completion": "position of tweezers was closed before and open afterwards, position of stamps was together before and separate afterwards, location of paper was covering stamps before and off stamps afterwards, state of stamp was stuck before and freed afterwards, placement of stamps was stuck before and unstuck afterwards, location of paper was on stamps before and on table afterwards, flexibility of stamp was adhered before and loose afterwards, location of tweezers was in drawer before and in hand afterwards, orientation of stamp was flat before and peeled afterwards, location of stamps was stuck together before and seperated afterwards\n###\n"}
{"prompt": "Lay a thin piece of paper or a clean handkerchief over the stamps. Set the iron to hot. Remove the paper and carefully tease apart the stamps using stamp tweezers. Add the separated stamps to your collection. Now, what happens?\n", "completion": "location of stamp was on envelope before and in collection afterwards, location of stamps was on table before and in collection afterwards, location of stamps was unorganized before and organized afterwards, state of collection was incomplete before and complete afterwards\n###\n"}
{"prompt": "Choose a beer for your citrus beer punch. Now, what happens?\n", "completion": "location of beer was in bottle before and out of bottle afterwards, orientation of beer was random before and selected afterwards, ownership of beer was in store before and at home afterwards, state of beer cap was on bottle before and removed afterwards, location of beer was on shelf before and in hand afterwards\n###\n"}
{"prompt": "Choose a beer for your citrus beer punch. Make a lemon simple syrup for the beer punch. Now, what happens?\n", "completion": "moisture of sugar was dry before and wet afterwards, location of lemon juice was in fruit before and in syrup afterwards, shape of lemon was whole before and cut/peeled afterwards, volume of pot was empty before and full afterwards, amount of mixture was original amount before and reduced afterwards, location of sugar was in jar before and in pan afterwards, composition of water was pure before and a suspension afterwards, taste of water was plain before and sweet afterwards, temperature of water was cold before and hot/boiling afterwards, state of sugar was solid before and dissolved afterwards, location of lemon was in refrigerator before and in pot afterwards, location of lemon juice was in lemon before and in pan afterwards, viscosity of syrup was thin before and thick afterwards, wholeness of lemon was whole before and sliced afterwards, wetness of pan was dry before and wet afterwards\n###\n"}
{"prompt": "Choose a beer for your citrus beer punch. Make a lemon simple syrup for the beer punch. Add the simple syrup and some fresh citrus juice to a punch bowl. Now, what happens?\n", "completion": "location of juice was in fruit before and in bowl afterwards, location of simple syrup was in pot before and in bowl afterwards, moisture of bowl was dry before and wet afterwards, weight of bowl was light before and heavy afterwards, location of simple syrup was in jar before and in punch bowl afterwards, wetness of punch bowl was dry before and wet afterwards, fullness of jar was full before and emptier afterwards, volume of bowl was empty before and full afterwards, composition of simple syrup and citrus juice was separate before and mixed afterwards, location of citrus juice was in pot before and in bowl afterwards, organization of ingredients was seperate before and combined afterwards, fullness of punch bowl was empty before and filled afterwards, volume of punch bowl was empty before and filled 1/3 full afterwards, temperature of syrup was warm before and cool afterwards\n###\n"}
{"prompt": "Choose a beer for your citrus beer punch. Make a lemon simple syrup for the beer punch. Add the simple syrup and some fresh citrus juice to a punch bowl. Add the beer to the punch bowl just before serving. Now, what happens?\n", "completion": "volume of bottle was full before and empty afterwards, composition of beer was separate before and mixed with citrus afterwards, weight of can was heavy before and light afterwards, weight of bottle was heavy before and empty afterwards, location of beer was bottled before and in bowl afterwards, state of punch was non-alcoholic before and alcoholic afterwards, fullness of can was full before and empty afterwards, fullness of punch bowl was half full before and full afterwards, location of beer was in bottle before and in punch afterwards, location of beer was in bottle before and in bowl afterwards, organization of ingredients was seperate before and combined afterwards, location of beer was in can before and in bowl afterwards\n###\n"}
{"prompt": "Purchase a pair of cotton gloves. Now, what happens?\n", "completion": "location of cotton gloves was on shelf before and in your house afterwards, availability of cotton gloves was unavailable before and available afterwards, knowledge of glove size was unknown before and known afterwards, possession of gloves was in store before and in bag afterwards, location of money was in wallet before and in cash register afterwards, temperature of weather was cold before and hot afterwards, cost of money for cotton gloves was insufficient before and sufficient afterwards, ownership of cotton gloves was in store before and at your home afterwards, location of cotton gloves was in the store before and in my bag afterwards\n###\n"}
{"prompt": "Purchase a pair of cotton gloves. Slip the cotton gloves on first, before wearing the rubber gloves. Now, what happens?\n", "completion": "connectedness of cotton gloves was unsnapped before and snapped afterwards, mass of gloves was empty before and full afterwards, state of hands was bare before and gloved afterwards, location of cotton gloves was on shelf before and at your hand afterwards, clothing of hands was bare before and covered afterwards, state of base off gloves was unfastened before and fastened afterwards, temperature of hands was cold before and hot afterwards, coverage of hands was empty before and covered afterwards, location of gloves was off before and on hands afterwards, orientation of cotton gloves was on shelf before and put on your hands afterwards\n###\n"}
{"prompt": "Purchase a pair of cotton gloves. Slip the cotton gloves on first, before wearing the rubber gloves. Place the rubber gloves over the top. Now, what happens?\n", "completion": "mass of rubber gloves was empty before and full afterwards, temperature of rubber gloves was cool before and warm afterwards, location of rubber gloves was in cabinet before and in hand afterwards, location of rubber gloves was on table before and on hands afterwards, orientation of rubber gloves was in cabinet before and pulled onto hands afterwards, thickness of rubber gloves was hollow before and filled fat afterwards, location of rubber gloves was off before and on afterwards, state of rubber gloves was unpurchased before and purchased afterwards, filling of rubber gloves was empty before and filled with hands afterwards\n###\n"}
{"prompt": "Purchase a pair of cotton gloves. Slip the cotton gloves on first, before wearing the rubber gloves. Place the rubber gloves over the top. Continue with the work. Now, what happens?\n", "completion": "state of hands was sticky before and dry afterwards, temperature of hands was hot before and cool afterwards, stability of gloves was slippery before and firm afterwards, texture of inner gloves was slimy before and soft afterwards, activity of work was being done before and continuing afterwards\n###\n"}
{"prompt": "Measure the elastic around your child&#x27;s neck. Now, what happens?\n", "completion": "organization of neck was plain before and surrounded by elastic afterwards, placement of elastic was away from neck before and around neck afterwards, location of elastic was elsewhere before and around the neck afterwards, knowledge of measurement was unknown before and now known afterwards, neck measurement of child's neck was unmeasured before and measured afterwards, state of elastic was unmeasured before and measured afterwards\n###\n"}
{"prompt": "Measure the elastic around your child&#x27;s neck. Have your child sit comfortably at the table following a good hand wash. Now, what happens?\n", "completion": "location of soap was in bottle before and in sink afterwards, position of child was standing before and sitting afterwards, state of child's hands was dirty before and now washed afterwards, child of child was standing before and sitting comfortably afterwards, location of water was in faucet before and in sink afterwards, wetness of hands was dry before and damp afterwards, availability of chair was vacant before and occupied afterwards, placement of child was standing before and sitting afterwards, state of child was standing before and seated afterwards, cleanness of hands was dirty before and clean afterwards, position of child was away from table before and at the table afterwards\n###\n"}
{"prompt": "Measure the elastic around your child&#x27;s neck. Have your child sit comfortably at the table following a good hand wash. Have your child continue threading the necklace until it is full of fruit loops. Now, what happens?\n", "completion": "threading of threading was empty before and full of threaded loops afterwards, organization of necklace thread was empty before and full of fruit loops afterwards, location of fruit loops was loose before and on string afterwards, organization of fruit loops was far from each other before and close to each other afterwards, placement of necklace was bare of fruit loops before and covered with fruit loops afterwards, location of fruit loops was on the table before and on the necklace afterwards, activity of child was waiting before and now busy afterwards\n###\n"}
{"prompt": "Measure the elastic around your child&#x27;s neck. Have your child sit comfortably at the table following a good hand wash. Have your child continue threading the necklace until it is full of fruit loops. Wear it. Now, what happens?\n", "completion": "decoration of child's neck was plain before and decorated afterwards, placement of necklace was unworn before and worn afterwards, shape of necklacce was a line before and a circle afterwards, location of necklace was in the hand before and on the neck afterwards, location of necklace was on table before and around neck afterwards, state of elastic was loose before and knotted afterwards\n###\n"}
{"prompt": "Find some clean snow. Now, what happens?\n", "completion": "temperature of hand was warmer before and cooler afterwards, location of snow was on the ground before and in the hand afterwards, location of snow was on the ground before and in a container afterwards, temperature of grass was warm before and cold afterwards, width of snow was spread out before and condensed in the container afterwards, wetness of grass was dry before and wet afterwards\n###\n"}
{"prompt": "Find some clean snow. Put the clean snow in a large bowl. Now, what happens?\n", "completion": "fullness of bowl was less full before and more full afterwards, container of bowl was empty before and full afterwards, state of bowl was empty before and full afterwards, temperature of bowl was room temperature before and cold afterwards, temperature of hand was colder before and warmer afterwards, location of snow was on the groun before and in a large bowl afterwards, location of snow was outdoors before and inside afterwards, wetness of bowl was dry before and wet afterwards, temperature of snow was in the hand before and in a bowl afterwards, state of bowl was empty before and full of snow afterwards\n###\n"}
{"prompt": "Find some clean snow. Put the clean snow in a large bowl. Add some milk or eggnog. Now, what happens?\n", "completion": "fullness of bowl was less full before and more full afterwards, location of eggnog was in container before and in bowl afterwards, location of eggnog was in the carton before and in the bowl afterwards, state of snow was plain before and a mixture afterwards, state of bowl was full of snow before and full of snow and milk or eggnog afterwards, location of milk was in container before and in bowl afterwards, location of milk was in the carton before and in the bowl afterwards, location of milk was in its container before and in a bowl afterwards, organization of snow was alone before and mixed with dairy afterwards, location of eggnog was in the jug before and in the snow afterwards, location of eggnog was in its cotainer before and in a bowl afterwards\n###\n"}
{"prompt": "Find some clean snow. Put the clean snow in a large bowl. Add some milk or eggnog. Enjoy it! Now, what happens?\n", "completion": "temperature of mouth was warmer before and cold afterwards, fullness of bowl was more full before and less full afterwards, location of ice cream was in the bowl before and in the mouth afterwards, fullness of stomach was less full before and more full afterwards, cleanness of spoon was clean before and dirty afterwards, location of snow was inside the container before and inside the person afterwards\n###\n"}
{"prompt": "Make sure conditions are right before starting the project. Now, what happens?\n", "completion": "state of humidity was high before and lower afterwards\n###\n"}
{"prompt": "Make sure conditions are right before starting the project. Clean your basement floor thoroughly. Now, what happens?\n", "completion": "cleanness of floor was dirty before and clean afterwards, loc of dirt was on floor before and in mop bucket afterwards, weight of vacuum was lighter before and heavier afterwards, texture of floor was dry before and wet afterwards, organization of basement was cluttered before and ordered afterwards, location of debris was scattered before and contained afterwards, dryness of floor was damp before and dried afterwards, organization of floor was unclear before and open afterwards, location of dust was on floor before and in trashcan afterwards, texture of floor was gritty before and smooth afterwards, cleanness of floor was soiled before and clean afterwards, cleanness of basement floor was dirty before and clean afterwards\n###\n"}
{"prompt": "Make sure conditions are right before starting the project. Clean your basement floor thoroughly. Protect baseboards and fixtures with masking tape. Now, what happens?\n", "completion": "wholeness of tape was whole before and cut afterwards, state of fixtures was exposed before and protected afterwards, state of tape was rolled before and unrolled afterwards, state of baseboards was exposed before and protected afterwards, covering of baseboards was bare before and masked afterwards, visibility of baseboards was exposed before and protected afterwards, location of tape was on a roll before and cut into pieces afterwards, location of tape was on roll before and on baseboards afterwards, location of tape was on roll before and on baseboard afterwards, volu of baseboards was plain before and taped afterwards, length of tape was round before and straight afterwards, state of baseboards was bare before and masked afterwards\n###\n"}
{"prompt": "Make sure conditions are right before starting the project. Clean your basement floor thoroughly. Protect baseboards and fixtures with masking tape. Choose the paint for the project. Now, what happens?\n", "completion": "location of paint was on the shelf before and in the basement afterwards, location of paint was at store before and in home afterwards, ownership of paint was at paintstore before and purchased afterwards\n###\n"}
{"prompt": "First, mix together the orange juice and the pineapple juice in a large glass bowl. Now, what happens?\n", "completion": "state of the bowl was empty before and filled with juice afterwards, states of the pineapple and orange juice was separate before and now mixed afterwards, moisture of bowl was dry before and wet afterwards, opacity of bowl was see through before and opaque afterwards, weight of glass bowl was light before and heavy afterwards, weight of bowl was lighter before and heavier afterwards, weight of bowl was light before and heavy afterwards, composition of juices was packaged separately before and mixed afterwards, location of juices was in cartons before and in bowl afterwards, location of juice was in carton before and in glass bowl afterwards, volume of bowl was empty before and full afterwards, container of glass bowl was empty before and filled with juice mixture afterwards, fullness of bowl was empty before and full afterwards, composition of juices was separate before and mixed afterwards, placement of the pineapple and orange juice was outside the bowl before and now inside the bowl afterwards\n###\n"}
{"prompt": "First, mix together the orange juice and the pineapple juice in a large glass bowl. Carefully pour the ginger ale into the juice. Now, what happens?\n", "completion": "form of juice mixture was flat before and effervescent afterwards, location of ginger ale was in bottle before and in bowl afterwards, location of ginger ale was in bottle before and in glass bowl afterwards, state of the ginger ale was separate from the juice before and now with the juice afterwards, volume of bowl was empty before and full afterwards, composition of ginger ale was separate before and mixed afterwards, weight of bowl was heavy before and heavier afterwards, organization of ingredients was seperate before and combined afterwards, weight of bottle was heavier before and lighter afterwards, strength of juice mixture was undiluted before and diluted afterwards, state of juice was still before and carbonated afterwards, placement of the ginger ale was in the bottle before and now poured into the bowl afterwards\n###\n"}
{"prompt": "First, mix together the orange juice and the pineapple juice in a large glass bowl. Carefully pour the ginger ale into the juice. Place the bowl in the refrigerator. Now, what happens?\n", "completion": "temperature of bowl was room temperature before and cold afterwards, location of glass bowl was on counter top before and in refrigerator afterwards, temperature of juice was room temperature before and chilled afterwards, temperature of juice was room temp before and refrigerated afterwards, temperature of juice mixture was warming before and chilling afterwards, placement of the bowl was outside of the refrigerator before and now inside the refrigerator afterwards, volume of fridge was empty before and full afterwards, location of bowl was on counter before and in fridge afterwards\n###\n"}
{"prompt": "First, mix together the orange juice and the pineapple juice in a large glass bowl. Carefully pour the ginger ale into the juice. Place the bowl in the refrigerator. Add several scoops of rainbow sherbet to the bowl of punch, or add some to each individual cup. Now, what happens?\n", "completion": "fullness of cup was empty before and full afterwards, opacity of juice was clear before and opaque afterwards, organization of ingredients was seperate before and combined afterwards, temperature of bowl was cold before and colder afterwards, location of sherbet was in freezer before and in glass bowl afterwards, complexity of juice mixture was beverage before and punch afterwards, placement of scoops of sherbet was away from juice before and now placed in juice afterwards, cleanness of scoop was clean before and dirty afterwards, location of sherbet was in carton before and in punch afterwards, state of sherbert was frozen before and melted afterwards\n###\n"}
{"prompt": "Plant the jade vines on an east wall with an eight-foot trellis. Now, what happens?\n", "completion": "space of space by east wall was empty before and has trellis afterwards, location of jade plant was in container before and planted afterwards, orientation of trellis was absent before and installed next to vines afterwards, plants of space by east wall was bare before and filled with plants afterwards, support of jade plant was lacking support before and supported afterwards, location of vines was in pots before and transplanted into garden afterwards, location of jade vines was in pots before and on wall afterwards\n###\n"}
{"prompt": "Plant the jade vines on an east wall with an eight-foot trellis. Prune in the daytime. Now, what happens?\n", "completion": "size of jade plants was whole before and pruned afterwards, usage of pruning shears was unsused before and pruning afterwards, step of jade plant was in free growth before and pruned afterwards, shape of jade plants was whole before and pruned afterwards, shape of vines was overgrown before and pruned afterwards\n###\n"}
{"prompt": "Plant the jade vines on an east wall with an eight-foot trellis. Prune in the daytime. Apply coffee grounds all year. Now, what happens?\n", "completion": "fertilizing of dirt was bare before and covered afterwards, location of coffee grounds was in can before and on plants afterwards, composition of garden soil was depleted before and fertilized afterwards, location of coffee grounds was off ground before and on ground afterwards, fertilizing of plants was low on nitrogen before and fertilized afterwards, step of soil was free of coffee grounds before and mixed with soil afterwards, location of coffee grounds was in coffee maker before and applied to vine base afterwards, treatment of plants was untreated before and fed afterwards\n###\n"}
{"prompt": "Plant the jade vines on an east wall with an eight-foot trellis. Prune in the daytime. Apply coffee grounds all year. Remove caterpillars. Now, what happens?\n", "completion": "pressure of vines was injured by pests before and relieved of pest pressure afterwards, removal of caterpillars was on plant before and off plant afterwards, location of caterpillars was on plants before and on ground afterwards, location of caterpillars was present before and absent afterwards, death of caterpillars was eating before and dead afterwards, cleanness of plants was infested before and clean afterwards, pests of plants was eaten before and saved afterwards\n###\n"}
{"prompt": "Plug in the cords in the right places. Now, what happens?\n", "completion": "location of the cords was unplugged before and plugged in afterwards, location of cords was in box before and out of box afterwards, length of cords was wound up and secured before and stretched out afterwards, power of cord was unplugged before and plugged in afterwards, state of cord was unplugged before and plugged in afterwards, state of cords was unplugged before and plugged in afterwards, brightness of screen was dark before and lit up afterwards, state of sega genesis was turned off before and turned on afterwards, electric conductivity of sega genesis was turned off before and energized afterwards\n###\n"}
{"prompt": "Plug in the cords in the right places. Insert a game cartridge into the top loading slot. Now, what happens?\n", "completion": "state of cartridge was loose before and plugged in afterwards, material of cartridge was in box before and removed from box afterwards, location of the cartridge was in a case before and in the console afterwards, density of the slot was empty before and filled afterwards, activity of the game was unused before and being used afterwards, location of game cartridge was on shelf before and in hand afterwards, location of cartridge was outside of sega genesis before and inside of sega genesis afterwards\n###\n"}
{"prompt": "Plug in the cords in the right places. Insert a game cartridge into the top loading slot. Hook up a Controller. Now, what happens?\n", "completion": "location of the console was without a controller before and connected to a controller afterwards, shape of controller wire was twist tied before and untied and stretched afterwards, organization of controller was unattached before and attached afterwards, location of controller was in box before and removed from box afterwards, power of wire was unplugged before and plugged in afterwards, availability of the controller was unhooked before and hooked up afterwards, power of power was off before and on afterwards\n###\n"}
{"prompt": "Plug in the cords in the right places. Insert a game cartridge into the top loading slot. Hook up a Controller. Turn the system on using the knob on the bottom left side that says on off. Now, what happens?\n", "completion": "location of system was in cupboard before and removed from cupboard afterwards, location of the knob was idle before and turned to the bottom afterwards, state of sega genesis was turned off before and turned on afterwards, power of system was unplugged before and plugged in afterwards, electric conductivity of the console was turned off before and turned on afterwards, shape of cords was wound up before and stretched out afterwards\n###\n"}
{"prompt": "Pluck the feathers, and skin the bird. Now, what happens?\n", "completion": "condition of turkey was plucked before and skinned afterwards, skinless of bird was covered in skin before and now bare in skin afterwards, composition of turkey was covered in feathers before and bald afterwards, state of turkey was feathered before and plucked afterwards, location of feathers was on bird before and off bird afterwards, coverage of bird was covered before and naked afterwards, location of skin was on bird before and off bird afterwards, composition of bird was covered in skin before and skinless afterwards, location of feathers was on turkey before and in the trash afterwards, location of feathers was on bird before and in trash afterwards, state of bird was covered in feathers before and now bare skinned afterwards\n###\n"}
{"prompt": "Pluck the feathers, and skin the bird. Slice off the outer layer of muscle on the turkey breast prior to cooking it. Now, what happens?\n", "completion": "location of knife was on counter before and in hand afterwards, wholeness of turkey was whole before and sliced afterwards, location of turkey breast was on turkey before and sliced partially afterwards, composition of turkey meat was entire before and sliced off afterwards, composition of muscle was uncut before and cut afterwards, location of muscle was on turkey breast before and off turkey breast afterwards\n###\n"}
{"prompt": "Pluck the feathers, and skin the bird. Slice off the outer layer of muscle on the turkey breast prior to cooking it. Bake the turkey the same way you would a store-bought turkey of its size, but baste it more frequently. Now, what happens?\n", "completion": "flavor of turkey was plain before and basted afterwards, power of oven was off before and on afterwards, wetness of turkey was dry before and basted afterwards, composition of turkey was dry before and basted afterwards, temperature of turkey was cold before and hot afterwards, location of turkey was on counter before and in oven afterwards, temperature of turkey was rare before and cooked afterwards, state of turkey was raw before and baked afterwards, mass of oven was empty before and full afterwards, composition of turkey was raw before and baked afterwards\n###\n"}
{"prompt": "Pluck the feathers, and skin the bird. Slice off the outer layer of muscle on the turkey breast prior to cooking it. Bake the turkey the same way you would a store-bought turkey of its size, but baste it more frequently. Deep fry the turkey in a special outdoor deep fryer. Now, what happens?\n", "completion": "location of turkey was inside before and outside afterwards, temperature of turkey was warm before and hot afterwards, composition of turkey was raw before and cooked/fried afterwards, color of turkey was pink before and brown afterwards, texture of turkey was dry before and moist afterwards, composition of turkey was baked before and deep fried afterwards, taste of turkey was inedible before and edible afterwards\n###\n"}
{"prompt": "Cut back any flower spikes. Now, what happens?\n", "completion": "length of flower spikes was long before and shorter afterwards, cleanness of pruners was clean before and dirty afterwards, state of the flower spikes was uncut before and cut afterwards, orientation of pruners was latched closed before and open afterwards, texture of plant was spiked before and smoother afterwards, location of flower spikes was on the plant before and off the plant afterwards\n###\n"}
{"prompt": "Cut back any flower spikes. Remove any dead, browned, or damaged foliage as close to the base of the plant as possible. Now, what happens?\n", "completion": "location of dead foliage was attached to the plant before and off the plant afterwards, location of foliage was standing before and removed afterwards, state of plant was covered in dead foliage before and free from dead foliage afterwards, location of the dead, browned, or damaged foliage was attached to the plant before and removed from the plant afterwards, location of dead foliage was near plant before and away from plant afterwards, clearness of base of the plant was cluttered before and clear afterwards\n###\n"}
{"prompt": "Cut back any flower spikes. Remove any dead, browned, or damaged foliage as close to the base of the plant as possible. Remove all the cut pieces and compost or put out with garden waste. Now, what happens?\n", "completion": "composition of cut pieces was separated before and in compost afterwards, weight of waste bin was lighter before and heavier afterwards, location of the pieces was in garden before and elsewhere afterwards, location of cut plant pieces was in the garden bed before and in the compost afterwards, fullness of compost bin was empty before and full afterwards\n###\n"}
{"prompt": "Cut back any flower spikes. Remove any dead, browned, or damaged foliage as close to the base of the plant as possible. Remove all the cut pieces and compost or put out with garden waste. Feed the plant with a nitrogen-rich fertilizer. Now, what happens?\n", "completion": "composition of soil under the plant was low in nutrients before and rich in nutrients afterwards, thickness of ground was thinner before and thicker afterwards, location of nitrogen was in the fertilizer mix before and in the plant roots afterwards, location of fertilizer was in container before and on plant afterwards, nourishment of the plant was being fed normally before and being fed with a nitrogen-rich fertilizer afterwards, cleanness of hands was clean before and dirtier afterwards, location of fertilizer was in the container before and on the ground afterwards\n###\n"}
{"prompt": "Put the first three ingredients in a blender and mix until smoothly blended. Now, what happens?\n", "completion": "capacity of the blender was less full before and fuller afterwards, location of ingredients was on counter before and in blender afterwards, weight of blender was lighter before and heavier afterwards, cleanness of blender was clean before and dirty afterwards, composition of ingredients was separate before and mixed afterwards, state of ingredients was whole before and blended afterwards, location of ingredients was in container before and in blender afterwards, size of ingredients was whole before and chopped afterwards, state of ingredients was separate before and blended afterwards, weight of the blender was lighter before and heavier afterwards\n###\n"}
{"prompt": "Put the first three ingredients in a blender and mix until smoothly blended. Add the extra virgin olive oil. Now, what happens?\n", "completion": "state of the blender was drier before and wetter afterwards, location of olive oil was in container before and in blender afterwards, location of oil was on shelf before and in pan/blender afterwards, weight of blender was lighter before and heavier afterwards, fullness of blender was emptier before and fuller afterwards, volume of the blender was less full before and more full afterwards, state of oil was separate before and mixed afterwards, weight of olive oil container was heavier before and lighter afterwards, volume of the bottle was more full before and less full afterwards, weight of the blender was lighter before and heavier afterwards\n###\n"}
{"prompt": "Put the first three ingredients in a blender and mix until smoothly blended. Add the extra virgin olive oil. Drizzle over hot, perhaps a grilled chicken or over anything that takes your fancy. Now, what happens?\n", "completion": "taste of the chicken was a plain before and now tastier afterwards, shape of oil was in bottle before and drizzling afterwards, weight of the plate was lighter before and heavier afterwards, temperature of the chicken was hotter before and cooler afterwards, cleanness of spoon was clean before and dirty afterwards, temperature of the dressing was cooler before and warmer afterwards, dressing of chicken was bare before and dressed afterwards\n###\n"}
{"prompt": "Put the first three ingredients in a blender and mix until smoothly blended. Add the extra virgin olive oil. Drizzle over hot, perhaps a grilled chicken or over anything that takes your fancy. Finished. Now, what happens?\n", "completion": "state of task was unfinished before and finished afterwards\n###\n"}
{"prompt": "Cut a length of garden netting that will go along the length of your chrysanthemum plants. Now, what happens?\n", "completion": "size of netting was on roll before and cut afterwards, state of the net was whole before and has been cut afterwards, weight of the net was heavier before and lighter afterwards, state of net was whole before and cut afterwards, state of crysanthemums was vulnerable before and protected afterwards, length of the net was longer before and shorter afterwards\n###\n"}
{"prompt": "Cut a length of garden netting that will go along the length of your chrysanthemum plants. Tie string onto each of the four corners of the garden netting. Now, what happens?\n", "completion": "location of string was on roll before and on netting afterwards, weight of the net was lighter before and heavier afterwards, weight of the netting was lighter before and heavier afterwards, size of the netting was smaller before and bigger afterwards, location of the string was elsewhere before and tied to the net afterwards, shape of the string was straighter before and tied afterwards, state of string was unattached before and attached afterwards, state of the string was untied before and tied afterwards, state of string was straight before and tied afterwards\n###\n"}
{"prompt": "Cut a length of garden netting that will go along the length of your chrysanthemum plants. Tie string onto each of the four corners of the garden netting. Tie each end of the string to a fence or supportive structure next to the chrysanthemums. Now, what happens?\n", "completion": "weight of the fence or supportive structure was lighter before and heavier afterwards, state of the string was unattached  to the fence or supportive structure before and attached  to the fence or supportive structure afterwards, state of netting was loose before and attached afterwards\n###\n"}
{"prompt": "Cut a length of garden netting that will go along the length of your chrysanthemum plants. Tie string onto each of the four corners of the garden netting. Tie each end of the string to a fence or supportive structure next to the chrysanthemums. Let the chrysanthemums fall back onto the netting. Now, what happens?\n", "completion": "weight of the netting was lighter before and heavier afterwards, support of the chrysanthemums was unsupported before and supported afterwards, location of the chrysanthemums was off the netting before and on the netting afterwards\n###\n"}
{"prompt": "Start off with the first level. Now, what happens?\n", "completion": "state of you was doing something else before and now starting the first level afterwards, state of you was waiting to play before and playing afterwards, state of first level was found before and started afterwards, knowledge of player was inexperienced before and experienced afterwards, electric conductivity of play station was turned off before and turned on afterwards\n###\n"}
{"prompt": "Start off with the first level. Always use cover. Now, what happens?\n", "completion": "position of you was exposed before and now covered afterwards, knowledge of you was using the cover sometimes before and always using the cover afterwards, state of body was upright before and prone afterwards, state of head was up before and down afterwards\n###\n"}
{"prompt": "Start off with the first level. Always use cover. Never, I repeat, NEVER go into an open battlefield with a half empty clip. Now, what happens?\n", "completion": "state of your clip was half empty before and loaded afterwards, state of you was going with a half empty clip before and now reloading before going afterwards, volume of clip was empty before and full afterwards\n###\n"}
{"prompt": "Start off with the first level. Always use cover. Never, I repeat, NEVER go into an open battlefield with a half empty clip. Stay by teammates. Now, what happens?\n", "completion": "state of teammate was far away before and close afterwards, location of you was going away from teammates before and staying with teammates afterwards, position of you was away from teammates before and near your teammates afterwards\n###\n"}
{"prompt": "In a pan add the tamarind pulp, the sugar/jaggery, and all other ingredients. Now, what happens?\n", "completion": "cleanness of pan was clean before and dirty afterwards, location of tamarind was in jar before and in pan afterwards, volume of pan was empty before and full afterwards, state of pan was empty before and full afterwards, location of sugar was in bag before and in pan afterwards, wetness of spices was dry before and wet afterwards, weight of pan was lighter before and heavier afterwards\n###\n"}
{"prompt": "In a pan add the tamarind pulp, the sugar/jaggery, and all other ingredients. Boil till the paste thickens to a ketchup like consistency. Now, what happens?\n", "completion": "state of paste was cool before and hot afterwards, consistency of paste was thinner before and thicker afterwards, temperature of stove was cold before and hot afterwards, state of ingredients was thin before and thick afterwards, temperature of paste was cold before and hot afterwards, temperature of pan was cold before and hot afterwards, thickness of paste was thinner before and thicker afterwards, temperature of mixture was cooler before and hotter afterwards, temperature of paste was cold before and hotter afterwards, thi] of paste was watery before and thickened afterwards\n###\n"}
{"prompt": "In a pan add the tamarind pulp, the sugar/jaggery, and all other ingredients. Boil till the paste thickens to a ketchup like consistency. Pour into another bowl and allow it cool. Now, what happens?\n", "completion": "volume of pan was full before and empty afterwards, temperature of mixture was hot before and cool afterwards, location of paste was in pan before and in bowl afterwards, state of bowl was empty before and full afterwards, volume of bowl was empty before and full afterwards, location of paste was in pot before and in bowl afterwards, temperature of paster was hot before and cooler afterwards, state of paste was hot before and cool afterwards, temperature of bowl was cool before and warm afterwards, temperature of paste was hotter before and cooler afterwards\n###\n"}
{"prompt": "In a pan add the tamarind pulp, the sugar/jaggery, and all other ingredients. Boil till the paste thickens to a ketchup like consistency. Pour into another bowl and allow it cool. Finished. Now, what happens?\n", "completion": "There will be no change.\n###\n"}
{"prompt": "Warm up a bowl of vinegar. Now, what happens?\n", "completion": "temperature of vinegar was cold before and warm afterwards, dryness of bowl was dry before and wet afterwards, location of vinegar was in the container before and in the bowl afterwards, temperature of bowl was room temperature before and warm afterwards, power of microwave was off before and on afterwards, moisture of bowl was dry before and wet afterwards, temperature of bowl was cold before and warm afterwards, temperature of vinegar was room temperature before and warm afterwards, location of vinegar was in storage container before and in bowl afterwards, volume of bowl was empty before and full afterwards, location of bowl was in the pantry before and on the counter afterwards, temperature of the bowl was cool before and warmer afterwards, temperature of liquid was cooler before and warmer afterwards\n###\n"}
{"prompt": "Warm up a bowl of vinegar. Dip a sponge into the warmed vinegar. Now, what happens?\n", "completion": "cleanness of sponge was clean before and dirty afterwards, weight of the sponge was lighter before and heavier afterwards, temperature of sponge was cool before and warm afterwards, location of bowl was in the microwave before and on the table afterwards, texture of sponge was dry before and wet afterwards, weight of sponge was light before and heavier afterwards, location of vinegar was in bowl before and in sponge afterwards, location of sponge was in storage before and in use afterwards, moisture of sponge was dry before and wet afterwards, dryness of sponge was dry before and wet afterwards, state of the sponge was dry before and wet afterwards, volume of sponge was light before and heavy afterwards, volume of liquid was fuller before and emptier afterwards, location of vinegar was in the bowl before and in the sponge afterwards, size of the sponge was smaller before and bigger afterwards\n###\n"}
{"prompt": "Warm up a bowl of vinegar. Dip a sponge into the warmed vinegar. Rub at the stains with the sponge. Now, what happens?\n", "completion": "cleanness of sponge was cleaner before and dirtier afterwards, state of the stains was dry before and wet afterwards, dryness of surfaces was dry before and wet afterwards, moisture of stain was dry before and wet afterwards, power of sink was on before and off afterwards, brightness of surfaces was discolored before and shiny afterwards, texture of fingers was dry before and wet afterwards, cleanness of surfaces was dirty before and clean afterwards, visibility of stain was visible before and invisible afterwards, pressure of hand was relaxed before and pushed afterwards, weight of sponge was heavier before and lighter afterwards\n###\n"}
{"prompt": "Warm up a bowl of vinegar. Dip a sponge into the warmed vinegar. Rub at the stains with the sponge. Keep rubbing until the stains come off. Now, what happens?\n", "completion": "motion of fingers was still before and moving afterwards, state of the stains was there before and gone afterwards, cleanness of sink was dirtier before and cleaner afterwards, color of sponge was orange before and blacker afterwards, state of stains was visible before and removed afterwards, form of stain was fixated before and dissolved afterwards, brightness of surfaces was dull before and shiny afterwards, pressure of hands was at ease before and sore afterwards, movement of hand was still before and in motion afterwards, moisture of stains was dry before and wet afterwards, pressure of sponge was under little pressure before and under greater pressure afterwards\n###\n"}
{"prompt": "Use the &quot;Happy Heart&quot; badge to up your HP to 50 - 55. Now, what happens?\n", "completion": "strength of boss was strong before and easier to defeat afterwards, strength of character was weak before and strong afterwards, state of happy heart was unused before and equipped afterwards, count of your hit points was lower before and higher afterwards, state of hp was 50 before and 55 afterwards, strength of hp was low before and higher afterwards\n###\n"}
{"prompt": "Use the &quot;Happy Heart&quot; badge to up your HP to 50 - 55. When you enter the battle use your Star Power. Now, what happens?\n", "completion": "power of power was basic before and enhanced afterwards, state of you was entering battle before and battling afterwards, availability of star power was available before and used afterwards\n###\n"}
{"prompt": "Use the &quot;Happy Heart&quot; badge to up your HP to 50 - 55. When you enter the battle use your Star Power. &quot;Chill Out&quot; 1 - 3 times. Now, what happens?\n", "completion": "stability of character was stressed before and relaxed afterwards, selection of you was using star power before and using chill out afterwards, power of fighting ability was low before and regenerated afterwards\n###\n"}
{"prompt": "Use the &quot;Happy Heart&quot; badge to up your HP to 50 - 55. When you enter the battle use your Star Power. &quot;Chill Out&quot; 1 - 3 times. Use Lakilester&#x27;s &quot;Spiny Surge. Now, what happens?\n", "completion": "strength of strength was normal before and improved afterwards, skill of special skills was basic before and advanced afterwards, state of spiny surge was available before and used afterwards, power of chance of winning was low before and increased afterwards, selection of you was using chill out before and spiny surge afterwards\n###\n"}
{"prompt": "Cover with the lid and let the steam soften the carrots just a little. Now, what happens?\n", "completion": "state of steam was venting before and building afterwards, location of steam was absent before and in the pot afterwards, texture of carrots was hard before and soft afterwards, coverage of pot was uncovered before and covered afterwards, state of carrots was hard before and soft afterwards, location of lid was absent before and on afterwards, moisture of carrots was dry before and wet afterwards, state of pot was uncovered before and covered afterwards, weight of the cooking vessel was lighter before and heavier afterwards, container of pot was uncovered before and covered afterwards, state of the cooking vessel was uncovered before and now covered afterwards, hardness of carrots was hard before and soft afterwards\n###\n"}
{"prompt": "Cover with the lid and let the steam soften the carrots just a little. Quickly blanch the green beans: Now, what happens?\n", "completion": "state of green beans was hard before and blanched afterwards, moisture of green beans was dry before and wet afterwards, location of green beans was absent before and in pot afterwards, temperature of green beans was cool before and hot afterwards, temperature of pot was cool before and hot afterwards, moisture of the beans was wetter before and now drier afterwards, texture of green beans was un-blanched before and blanched afterwards, temperature of green beans was cold before and hot afterwards\n###\n"}
{"prompt": "Cover with the lid and let the steam soften the carrots just a little. Quickly blanch the green beans: Now here&#x27;s the easy part - putting it together. Now, what happens?\n", "completion": "state of the vegetable was separate before and now together afterwards, composition of vegetables was separate before and combined afterwards, weight of bowl was lighter before and heavier afterwards, fullness of bowl was empty before and full afterwards, location of ingredients was separate before and together afterwards\n###\n"}
{"prompt": "Cover with the lid and let the steam soften the carrots just a little. Quickly blanch the green beans: Now here&#x27;s the easy part - putting it together. Here&#x27;s your easy healthy salad recipe! Now, what happens?\n", "completion": "There will be no change.\n###\n"}
{"prompt": "Sponge the area using a little portion of dry-cleaning solvent. Now, what happens?\n", "completion": "cleanness of sponge was cleaner before and dirtier afterwards, wetness of the area was dry before and wetter afterwards, dampness of area was dry before and wet afterwards, location of solvent was in the container before and on carpet afterwards, coverage of stain was exposed before and covered afterwards, location of solvent was in jar before and on carpet afterwards, odor of cement was plain smelling before and strong stink afterwards, moisture of sponge was dry before and wet afterwards, moisture of carpet was dry before and wet afterwards, moisture of carpet was free of solvent before and wet from solvent afterwards, texture of cement was hard before and soft afterwards, location of solvent was inside a container before and on the carpet afterwards\n###\n"}
{"prompt": "Sponge the area using a little portion of dry-cleaning solvent. Make a mixture of one tablespoon of a mild, gentle detergent with 236 milliliters (8  fl oz) of warm water. Now, what happens?\n", "completion": "temperature of detergent was cool before and warm afterwards, state of detergent and water was separate before and mixed together afterwards, location of detergent was in bottle before and in water afterwards, weight of bucket was light before and heavy afterwards, fullness of bucket was empty before and full afterwards, wetness of detergent and water container was dry before and wet afterwards, composition of detergent and warm water was separate before and mixed afterwards, composition of water was pure before and soapy afterwards, fullness of detergent dispenser was fuller before and emptier afterwards, weight of detergent dispenser was heavier before and lighter afterwards, state of mixture was separated before and mixed together afterwards, moisture of bucket was dry before and wet afterwards\n###\n"}
{"prompt": "Sponge the area using a little portion of dry-cleaning solvent. Make a mixture of one tablespoon of a mild, gentle detergent with 236 milliliters (8  fl oz) of warm water. Blot the mixture over the rubber cement stain. Now, what happens?\n", "completion": "moisture of rubber cement was dry before and wet afterwards, odor of stain was strong and smelly before and weakened, cleaner smelling afterwards, moisture of carpet was dry before and wet afterwards, location of water mixture was in container before and now on stain afterwards, softness of stain was hard before and softening afterwards, location of mixture was in a bucket before and on the carpet afterwards, wetness of rubber cement stain was drier before and wetter afterwards, color of stain was sharp before and disappearing afterwards\n###\n"}
{"prompt": "Sponge the area using a little portion of dry-cleaning solvent. Make a mixture of one tablespoon of a mild, gentle detergent with 236 milliliters (8  fl oz) of warm water. Blot the mixture over the rubber cement stain. Use clean water as a rinse. Now, what happens?\n", "completion": "cleanness of carpet was soapy before and clean afterwards, location of water was in a bucket before and on the carpet afterwards, wetness of carpet was drier before and wetter afterwards, status of stain was set in before and removed afterwards, state of stain was holding solution before and rinsed of solution afterwards, cleanness of stain was messy before and rinsed afterwards\n###\n"}
{"prompt": "Take a single sheet of paper. Now, what happens?\n", "completion": "pressure of hand was relaxed before and grabbing knob afterwards, ownership of ream of paper was property of the store before and the person's property afterwards, location of paper was in the package before and on the desk afterwards, state of paper was part of a ream before and a single piece afterwards, position of drawer was closed before and open afterwards, orientation of hand was empty before and holding paper afterwards, location of paper was on shelf before and on table afterwards, location of paper was in the drawer before and on the table afterwards, ownership of paper was for sale in store before and bought by you afterwards, height of paper stack was taller before and shorter afterwards\n###\n"}
{"prompt": "Take a single sheet of paper. Hold the top right corner of the paper and fold it towards the lower left side. Now, what happens?\n", "completion": "location of paper was on table before and in hand afterwards, state of paper was flat before and folded afterwards, shape of paper was flat before and folded on left side afterwards, pressure of fingers was loose before and tightened afterwards, thickness of sides was thinner before and thicker afterwards, folded of material was straight before and now afterwards, orientation of paper was straight before and bent afterwards, age of paper was new before and old afterwards, orientation of hand was in the top right corner before and in the lower left corner afterwards\n###\n"}
{"prompt": "Take a single sheet of paper. Hold the top right corner of the paper and fold it towards the lower left side. Cut this section off using paper scissors. Now, what happens?\n", "completion": "location of scissors was in the drawer before and in the hand afterwards, shape of paper was whole before and cut afterwards, state of paper was whole before and cut afterwards, shape of paper was a rectangle before and a square afterwards, state of blades was together before and separated afterwards, location of scissors was in drawer before and on table afterwards, location of paper was in hand before and on table afterwards, location of section was attached before and cut off afterwards, mobility of scissors was static before and have cut paper afterwards\n###\n"}
{"prompt": "Take a single sheet of paper. Hold the top right corner of the paper and fold it towards the lower left side. Cut this section off using paper scissors. Unfold.######//&lt;! Now, what happens?\n", "completion": "location of hands was apart before and together afterwards, shape of paper was smaller before and bigger afterwards, shape of fingers was curled before and straight afterwards, location of scissors was in hand before and on the table afterwards, state of paper was folded before and a straight afterwards, shape of paper was folded before and unfolded afterwards\n###\n"}
{"prompt": "Choose the fruit combination. Now, what happens?\n", "completion": "state of fruit was for sale before and purchased afterwards\n###\n"}
{"prompt": "Choose the fruit combination. Cut the fruit into cubes. Now, what happens?\n", "completion": "wetness of cutting board was dry before and wet afterwards, shape of fruit was whole before and cubed afterwards, composition of fruit was whole before and cubed afterwards, moisture of cutting mat was dry before and wet afterwards, location of fruit peels was on the fruit before and off of the fruit afterwards, state of fruit was whole before and cut afterwards, state of fruit was whole before and cubed afterwards, cleanness of knife was clean before and dirty afterwards\n###\n"}
{"prompt": "Choose the fruit combination. Cut the fruit into cubes. Do this on the actual serving dish. Now, what happens?\n", "completion": "weight of dish was lighter before and heavier afterwards, cleanness of serving dish was clean before and dirty afterwards, location of fruit was on the cutting board before and on the serving dish afterwards, shape of fruit was piled before and assembled into a cube afterwards, complete of fruit salad cubes was incomplete before and ready to serve afterwards, fullness of dish was empty before and full afterwards\n###\n"}
{"prompt": "Choose the fruit combination. Cut the fruit into cubes. Do this on the actual serving dish. Serve. Now, what happens?\n", "completion": "location of fruit was on the counter before and on the table afterwards\n###\n"}
{"prompt": "Remove the weeds first. Now, what happens?\n", "completion": "thickness of lawn was thicker before and thinner afterwards, cleanness of garden/lawn was overgrown with weeds before and clear of weeds afterwards, location of weeds was in the lawn before and discarded afterwards, composition of dirt was undisturbed before and pitted afterwards, location of weeds was in lawn before and in trash afterwards, state of weeds was alive before and dead afterwards, state of weeds was in lawn before and pulled afterwards, cleanness of hands was clean before and dirty afterwards\n###\n"}
{"prompt": "Remove the weeds first. Cut the grass back in stages. Now, what happens?\n", "completion": "length of grass was longer before and shorter afterwards, length of grass was long before and trimmed afterwards, state of lawn mower was turned off before and turned on afterwards, cleanness of grass was messy before and tidy afterwards, composition of grass blades was whole before and in pieces afterwards, length of grass was long before and short afterwards, cleanness of clippers was clean before and dirty afterwards\n###\n"}
{"prompt": "Remove the weeds first. Cut the grass back in stages. A lawn that is cut back a lot will benefit from a boost of fertiliser to help it get growing again. Now, what happens?\n", "completion": "fertility of lawn was yellowing before and green afterwards, state of soil was poor before and fertilized afterwards, location of fertilizer was in can before and in soil afterwards, cleanness of shovel was clean before and dirty afterwards, composition of lawn was bare before and fertilized afterwards, composition of soil was undisturbed before and turned over afterwards, composition of lawn was nutrient poor before and fertile afterwards, fertilization of soil was plain before and fertilized afterwards\n###\n"}
{"prompt": "Remove the weeds first. Cut the grass back in stages. A lawn that is cut back a lot will benefit from a boost of fertiliser to help it get growing again. Try to keep it tended as normal during the remainder of the growing season. Now, what happens?\n", "completion": "cleanness of lawn was unkempt before and tended afterwards\n###\n"}
{"prompt": "Make a Mongoose on Valhalla at the edge of the map (the water side). Now, what happens?\n", "completion": "location of you was elsewhere before and on valhalla at the edge of the map afterwards, knowledge of halo 3 knowledge was novice before and intermediate afterwards, construction of mongoose vehicle was absent before and made afterwards, location of position in valhalla was centered before and near water afterwards, state of halo 3 was absent before and purchased afterwards, creation of you was without a mongoose before and now making a mongoose afterwards, state of mongoose was considered before and made afterwards, location of map location was unknown before and in valhalla afterwards, location of player was within the mapped area before and on the water side edge of the map afterwards\n###\n"}
{"prompt": "Make a Mongoose on Valhalla at the edge of the map (the water side). 2.jpg|right|184px]]Get in and accelerate forward. Now, what happens?\n", "completion": "location of you was out before and in the mongoose afterwards, speed of mongoose speed was slow before and fast afterwards, state of mongoose was stationary before and moving afterwards, skill of ability to drive mongoose was missing before and present afterwards, motion of mongoose was stationary before and accelerating forward afterwards, location of character position was on ground before and in mongoose afterwards, state of you was still before and moving afterwards, direction of direction of travel was missing before and forward afterwards, position of player was standing near the mongoose before and seated in the mongoose afterwards\n###\n"}
{"prompt": "Make a Mongoose on Valhalla at the edge of the map (the water side). 2.jpg|right|184px]]Get in and accelerate forward. Make a Wraith about 2 meters (6.6 ft) back, then ram the accelerating Mongoose. Now, what happens?\n", "completion": "stability of wraith was missing before and created afterwards, state of mongoose was traveling before and rammed by wraith afterwards, material of wraith was absent before and created afterwards, speed of mongoose was stationary before and accelerated toward wraith afterwards, state of wraith was forward before and moved back afterwards, creation of you was without a wraith before and making a wraith afterwards, location of the wraith was 2 meters back before and now ramming the mongoose afterwards, knowledge of knowledge of what wraith (type-26 assault gun carriage) is was absent before and is present afterwards, availability of portal was closed before and opened afterwards, location of location of wraith was near mongoose before and 2 meters back afterwards\n###\n"}
{"prompt": "Make a Mongoose on Valhalla at the edge of the map (the water side). 2.jpg|right|184px]]Get in and accelerate forward. Make a Wraith about 2 meters (6.6 ft) back, then ram the accelerating Mongoose. For a split second the Mongoose will go out the map. Now, what happens?\n", "completion": "state of player was restricted before and free to explore afterwards, state of off-map world was unexplored before and explored afterwards, location of mongoose was on map before and off map afterwards, position of player was sitting in the mongoose before and jumping out of the mongoose afterwards, location of mongoose was within the map before and outside of the map afterwards, location of character was on map before and off map afterwards, location of the mongoose was on the map before and momentarily off the map afterwards, state of mongoose was on map before and off map afterwards, location of character position was on ground before and in air afterwards\n###\n"}
{"prompt": "Put all ingredients into the blender. Now, what happens?\n", "completion": "location of ingredients was outside the blender before and in the blender afterwards, container of blender was empty before and full afterwards, location of ingredients was in the fridge before and in the blender afterwards, temperature of blender was room temperature before and colder afterwards, weight of blender was lighter before and heavier afterwards, location of mint leaf was on the plant before and in the blender afterwards, moisture of blender was dry before and wet afterwards, fullness of blender was empty before and full afterwards, organization of ingredients was separate before and together afterwards, location of ice cream was in the freezer before and in the blender afterwards, state of ingredients was separate before and mixed afterwards, location of chocolate was in a package before and in the blender afterwards\n###\n"}
{"prompt": "Put all ingredients into the blender. Blend for 30-45 seconds or until all ingredients are blended together. Now, what happens?\n", "completion": "thickness of mixture was thin before and thickened afterwards, state of ingredients was whole before and pureed afterwards, power of blender was off before and on afterwards, composition of ingredients was separate before and combined afterwards, location of ingredients was in the freezer before and in the blender afterwards, composition of milk was unmixed before and mixed with the other ingredients afterwards, composition of ingredients was whole before and blended afterwards, speed of blender blade was stationary before and moving afterwards, texture of ice cream was hard before and soft afterwards\n###\n"}
{"prompt": "Put all ingredients into the blender. Blend for 30-45 seconds or until all ingredients are blended together. Pour the milkshake into a tall glass. Now, what happens?\n", "completion": "weight of blender was heavier before and lighter afterwards, wetness of glass was dry before and wet afterwards, location of ingredients was in the blender before and in the glass afterwards, fullness of glass was empty before and full afterwards, cleanness of glass was clean before and dirty afterwards, moisture of glass was dry before and wet afterwards, container of blender was full before and empty afterwards, location of milkshake was in blender before and in glass afterwards, temperature of glass was room temperature before and cold afterwards, location of milkshake was in the blender before and in the glass afterwards\n###\n"}
{"prompt": "Put all ingredients into the blender. Blend for 30-45 seconds or until all ingredients are blended together. Pour the milkshake into a tall glass. Serve and enjoy! Now, what happens?\n", "completion": "location of milkshake was on the counter before and on the table afterwards, temperature of straw was room temperature before and cold afterwards, cleanness of straw was clean before and dirty afterwards, weight of glass was full before and declining in fullness afterwards, moisture of mint leaf was dry before and wet afterwards, temperature of a person's mouth was warm before and colder afterwards, location of glass was near the blender before and near a person's mouth afterwards, emotional state of a person was feeling neutral before and happier afterwards, moisture of straw was dry before and wet afterwards\n###\n"}
{"prompt": "Try the cotton wool method. Now, what happens?\n", "completion": "location of splinters was in foot before and in cotton wool afterwards, pressure of hand was relaxed before and being used afterwards, cleanness of wool was unused before and covered in glass afterwards, location of cotton wool was in the drawer before and in hand afterwards, location of cotton wool was in drawer before and in hand afterwards, clarity of pieces was scattered before and wiped away afterwards, state of hand was empty before and holding cotton wool afterwards, cleanness of floor was messier before and cleaner afterwards, location of glass splinters was on the ground before and on the cotton wool afterwards, state of wool was clean before and full of glass afterwards\n###\n"}
{"prompt": "Try the cotton wool method. Try the soap method. Now, what happens?\n", "completion": "location of glass splinters was on the ground before and on the soap afterwards, wetness of splinter was dry before and moist afterwards, state of hand was empty before and holding soap afterwards, texture of hand was dry before and sticky afterwards, location of soap was in the bathroom before and in hand afterwards, state of soap was clean before and full of glass afterwards, cleanness of soap was clean before and dirty afterwards, location of glass was on the floor before and in the soap afterwards, temperature of fingers was warm before and cold afterwards\n###\n"}
{"prompt": "Try the cotton wool method. Try the soap method. Try the wet paper method. Now, what happens?\n", "completion": "location of paper was in drawer/on coffee table before and in hands afterwards, state of glas was on floor before and in paper afterwards, state of paper was dry before and wet afterwards, texture of newspaper was dry before and wet afterwards, wetness of paper was dry before and wet afterwards, state of hands was unused before and holding paper afterwards, location of water was in a bowl before and on the paper afterwards, location of glass splinters was on the ground before and in the paper afterwards, wetness of paper towel was dry before and wet afterwards, cleanness of floor was messier before and cleaner afterwards, location of paper was in the drawer before and on the ground afterwards\n###\n"}
{"prompt": "Try the cotton wool method. Try the soap method. Try the wet paper method. Discard properly. Now, what happens?\n", "completion": "cleanness of paper was new before and used afterwards, state of trashcan was closed before and open afterwards, location of glass was on the floor before and in the paper afterwards, location of wet paper was in hand before and in the trash afterwards, volume of bag was emptier before and fuller afterwards, state of hands was holding wet paper before and empty afterwards, location of paper towel was in a hand before and in trash can afterwards, pressure of hands was being used before and relaxed afterwards\n###\n"}
{"prompt": "Set up a man and a woman couple in a house with a double bed. Now, what happens?\n", "completion": "state of people was single before and together afterwards, state of sims game was unavailable before and in progress afterwards, preference of preference of characters was unknown before and heterosexual afterwards, location of house was absent before and present afterwards, age of age of couple was unknown before and adult afterwards, state of bed was empty before and full afterwards\n###\n"}
{"prompt": "Set up a man and a woman couple in a house with a double bed. Make sure that the two Sims have chemistry between them. Now, what happens?\n", "completion": "friendship of sims was strangers before and friends afterwards, state of sims was single before and compatible afterwards, proximity of sims was far from each other before and close afterwards, location of sims was outside before and inside the house afterwards, magnitude of lifetime relationship score was unknown before and high afterwards, magnitude of daily relationship score was unknown before and high afterwards, location of characters was apart before and together afterwards, knowledge of woohoo mods was unknown before and available afterwards\n###\n"}
{"prompt": "Set up a man and a woman couple in a house with a double bed. Make sure that the two Sims have chemistry between them. Have both Sims &quot;relax&quot; in the same double bed. Now, what happens?\n", "completion": "position of sims was standing before and lying down afterwards, activity of sims was talking before and touching afterwards, state of characters was unrelaxed before and relaxed afterwards, occupation of bed was vacant before and occupied afterwards, location of first sim was standing before and in bed afterwards, location of second sim was standing before and with first sim afterwards, state of sims was standing before and laying down afterwards, state of relax button was unclicked before and clicked afterwards\n###\n"}
{"prompt": "Set up a man and a woman couple in a house with a double bed. Make sure that the two Sims have chemistry between them. Have both Sims &quot;relax&quot; in the same double bed. Click on &quot;make out&quot;, &quot;cuddle&quot;, and other stuff. Now, what happens?\n", "completion": "state of woo hoo button was unclicked before and clicked afterwards, position of blankets was flat before and raised afterwards, state of button was unclicked before and clicked afterwards, activity of sims was touching before and making out afterwards, location of sims was above the covers before and under the covers afterwards, state of cuddle button was unclicked before and clicked afterwards, state of make out button was unclicked before and clicked afterwards, state of sim characters was calm before and in flagrante delecti afterwards\n###\n"}
{"prompt": "Preheat the oven to 350 °F (177 °C) and lightly oil a cooking sheet. Now, what happens?\n", "completion": "state of oven was off before and on afterwards, state of cooking sheet was dry before and oily afterwards, setting of oven dial was all the way to the left before and three quarters away from the furthermost right setting afterwards, temperature of oven was cool before and hot afterwards, cleanness of cooking sheet was clean before and oily afterwards, viscosity of oven was dry before and oiled afterwards, moisture of sheet pan was dry before and wet afterwards, power of oven was off before and on afterwards, location of oil was in the bottle before and on the cooking sheet afterwards, cleanness of sheet pan was clean before and dirty afterwards, orientation of oven knob was in the off position before and in the on position afterwards, temperature of oven was cold before and hot afterwards\n###\n"}
{"prompt": "Preheat the oven to 350 °F (177 °C) and lightly oil a cooking sheet. In a large bowl, whisk together the oil, garlic, pepper, salt, marjoram, thyme, rosemary, dill and water. Now, what happens?\n", "completion": "moisture of bowl was dry before and wet afterwards, state of bowl was empty before and filled with ingredients afterwards, weight of bowl was lighter before and heavier afterwards, cleanness of whisk was clean before and dirty afterwards, moisture of salt was dry before and wet afterwards, location of oil was in the cupboard before and on the counter afterwards, volume of bowl was empty before and full afterwards, location of pepper was in the pepper grinder before and in the bowl afterwards, fullness of bowl was empty before and full afterwards, weight of bowl was light before and heavier afterwards, state of ingredients was separate before and combined afterwards, cleanness of bowl was clean before and dirty afterwards, wetness of bowl was dry before and now wet and oily afterwards\n###\n"}
{"prompt": "Preheat the oven to 350 °F (177 °C) and lightly oil a cooking sheet. In a large bowl, whisk together the oil, garlic, pepper, salt, marjoram, thyme, rosemary, dill and water. Place the slices of tofu onto a cookie sheet and coat them with marinade. Now, what happens?\n", "completion": "flavor of tofu was plain before and marinated afterwards, taste of tofu was plain before and seasoned afterwards, location of tofu was in the fridge before and on the cookie sheet afterwards, location of tofu was on the cutting board before and on the cooking sheet afterwards, coating of tofu was bare before and marinaded afterwards, composition of tofu was whole before and cut into slices afterwards, fullness of cooking sheet was empty before and full afterwards, location of marinade was in the bowl before and on the tofu afterwards, state of cookie sheet was empty before and now holding tofu afterwards, state of tofu was plain before and now coated with marinade afterwards\n###\n"}
{"prompt": "Preheat the oven to 350 °F (177 °C) and lightly oil a cooking sheet. In a large bowl, whisk together the oil, garlic, pepper, salt, marjoram, thyme, rosemary, dill and water. Place the slices of tofu onto a cookie sheet and coat them with marinade. Bake the tofu for 1 hour, flipping them once after the first 30 minutes. Now, what happens?\n", "completion": "sound of tofu was silent before and sizzling afterwards, orientation of tofu was right side up before and upside down afterwards, cleanness of fork was clean before and dirty afterwards, state of tofu was raw before and cooked afterwards, cooked status of tofu was raw before and cooked afterwards, temperature of cooking sheet was cold before and hot afterwards, composition of tofu was raw before and baked afterwards, temperature of tofu was cold before and hot afterwards\n###\n"}
{"prompt": "Mix one part skim (low-fat) milk with 9 parts of water. Now, what happens?\n", "completion": "composition of milk and water was separate before and combined afterwards, moisture of glass was dry before and wet afterwards, volume of glass was empty before and full afterwards, state of water faucet was off before and on afterwards, location of water was in tap before and in glass afterwards, state of ingredients was separate before and mixed afterwards, location of skim milk was in fridge before and in measuring cup afterwards, volume of measuring cup was empty before and full afterwards, location of milk was in carton before and in glass afterwards\n###\n"}
{"prompt": "Mix one part skim (low-fat) milk with 9 parts of water. Place in a spray bottle. Now, what happens?\n", "completion": "weight of spray bottle was light before and heavy afterwards, location of spray bottle was under sink before and on counter afterwards, volume of bottle was empty before and full afterwards, moisture of spray bottle was dry before and wet afterwards, cleanness of spray bottle was clean before and dirty afterwards, volume of spray bottle was empty before and full afterwards, state of bottle was empty before and full afterwards\n###\n"}
{"prompt": "Mix one part skim (low-fat) milk with 9 parts of water. Place in a spray bottle. Spray on plants affected by powdery mildew. Now, what happens?\n", "completion": "state of plants was dry before and wet afterwards, texture of mildew was powdery before and wetter afterwards, viability of mildew was alive before and dead afterwards, location of mixture was in spray bottle before and on leaves afterwards, moisture of leaves was dry before and wet afterwards, composition of plants was dry before and wet afterwards, weight of spray bottle was heavy before and lighter afterwards, location of mixture was in bottle before and on plants afterwards\n###\n"}
{"prompt": "Mix one part skim (low-fat) milk with 9 parts of water. Place in a spray bottle. Spray on plants affected by powdery mildew. Make fresh each week. Now, what happens?\n", "completion": "There will be no change.\n###\n"}
{"prompt": "Bend two same-colored pipe cleaners into half square shapes. Now, what happens?\n", "completion": "There will be no change.\n###\n"}
{"prompt": "Bend two same-colored pipe cleaners into half square shapes. Loop the end of a pipe cleaner above the front leg. Now, what happens?\n", "completion": "There will be no change.\n###\n"}
{"prompt": "Bend two same-colored pipe cleaners into half square shapes. Loop the end of a pipe cleaner above the front leg. Using another pipe cleaner, repeat step 2 on the other side of the chair. Now, what happens?\n", "completion": "There will be no change.\n###\n"}
{"prompt": "Bend two same-colored pipe cleaners into half square shapes. Loop the end of a pipe cleaner above the front leg. Using another pipe cleaner, repeat step 2 on the other side of the chair. Meet both ends of the back pipe cleaners, twisting them over each other to close the chair back. Now, what happens?\n", "completion": "There will be no change.\n###\n"}
{"prompt": "Combine the apricots, vinegar, and sugar in a blender. Now, what happens?\n", "completion": "cleanness of blender was clean before and dirty afterwards, weight of blender was lighter before and heavier afterwards, location of apricots was on counter before and in blender afterwards, state of the apricots, vinegar, and sugar was separate before and combined afterwards, location of sugar was in bag before and in blender afterwards, volume of blender was empty before and full afterwards, state of ingredients was separate before and combined afterwards, weight of the blender was lighter before and heavier afterwards\n###\n"}
{"prompt": "Combine the apricots, vinegar, and sugar in a blender. With the blender running, slowly add the oil until the dressing becomes thick and smooth. Now, what happens?\n", "completion": "weight of oil bottle was heavier before and lighter afterwards, cleanness of blender was clean before and dirty afterwards, weight of blender was lighter before and heavier afterwards, state of oil was separate before and mixed afterwards, electric conductivity of blender was turned off before and turned on afterwards, thickness of dressing was thinner before and thicker afterwards, moisture of blender was dry before and wet afterwards, thickness of dressing was thin before and thicker afterwards, volume of blender was empty before and full afterwards, location of the oil was outside of the blender before and inside the blender afterwards, weight of the blender was lighter before and heavier afterwards, thickness of the dressing was thin before and thick afterwards\n###\n"}
{"prompt": "Combine the apricots, vinegar, and sugar in a blender. With the blender running, slowly add the oil until the dressing becomes thick and smooth. Stir in the basil. Now, what happens?\n", "completion": "wetness of basil was dry before and wetter afterwards, state of basil was separate before and mixed in afterwards, location of basil was on counter before and in blender afterwards, location of the basil was outside of the blender before and inside the blender afterwards\n###\n"}
{"prompt": "Combine the apricots, vinegar, and sugar in a blender. With the blender running, slowly add the oil until the dressing becomes thick and smooth. Stir in the basil. Serve. Now, what happens?\n", "completion": "weight of the blender was heavier before and lighter afterwards, location of dressing was in blender before and on serving plate afterwards, location of the dressing was in the blender before and now served afterwards, location of dressing was away from other food before and served afterwards\n###\n"}
{"prompt": "Before starting the battle, equip and reload the TMP. Now, what happens?\n", "completion": "state of salazar was victorious before and defeated afterwards, location of tmp was in inventory before and equipped afterwards, state of tmp was unequipped before and equipped afterwards, state of the tmp was unequipped before and now equipped afterwards, state of game was lost before and won afterwards, readiness of tmp was unloaded before and loaded afterwards, knowledge of player was inexperienced before and experienced afterwards, state of inventory was closed before and opened afterwards\n###\n"}
{"prompt": "Before starting the battle, equip and reload the TMP. When the battle begins, use the TMP and fire repeatedly at the eye. Now, what happens?\n", "completion": "state of tmp was unfired before and fired afterwards, state of the tmp was at rest before and now firing afterwards, state of eye was unhurt before and hurt afterwards, state of battle was planned before and in progress afterwards, state of tmp was idle before and being used afterwards\n###\n"}
{"prompt": "Before starting the battle, equip and reload the TMP. When the battle begins, use the TMP and fire repeatedly at the eye. Immediately equip the rocket launcher. Now, what happens?\n", "completion": "location of rocket launcher was in inventory before and equipped afterwards, location of tmp was equipped before and in inventory afterwards, state of the rocket launcher was unequipped before and now equipped afterwards, state of hands was holding tmp before and holding rocket launcher afterwards, state of rocket launcher was unequipped before and equipped afterwards\n###\n"}
{"prompt": "Before starting the battle, equip and reload the TMP. When the battle begins, use the TMP and fire repeatedly at the eye. Immediately equip the rocket launcher. Aim for Salazar&#x27;s unarmed and unprotected body and FIRE! Now, what happens?\n", "completion": "state of salazar was victorious before and defeated afterwards, viability of salazar was alive before and dead afterwards, orientation of rocket launcher was unaimed before and aimed at salazar afterwards, state of rocket launcher was idle before and fired afterwards, focus of you was aiming elsewhere before and aiming at a specific target afterwards\n###\n"}
{"prompt": "In a small bowl, mix the crushed cornflakes, peanut butter, and butter together. Now, what happens?\n", "completion": "location of peanut butter was in jar before and in bowl afterwards, composition of the ingredients was separated before and mixed afterwards, form of cornflakes was whole before and crushed afterwards, cleanness of bowl was clean before and dirtier afterwards, wetness of the bowl was drier before and wetter afterwards, size of cornflakes was whole before and crushed afterwards, weight of bowl was lighter before and heavier afterwards, weight of the bowl was lighter before and heavier afterwards, volume of bowl was empty before and full afterwards, composition of ingredients was separated before and combined afterwards, location of cornflakes was in carton before and in bowl afterwards, state of the bowl was empty before and full afterwards, location of peanut butter was in storage before and in bowl afterwards, cleanness of bowl was clean before and dirty afterwards, weight of bowl was lighter before and heavier afterwards\n###\n"}
{"prompt": "In a small bowl, mix the crushed cornflakes, peanut butter, and butter together. Using a knife, spread the mixture over the grapefruit half. Now, what happens?\n", "completion": "taste of grapefruit was tart before and sweeter afterwards, cleanness of the knife was clean before and covered in mixture afterwards, location of knife was in storage before and in use afterwards, moisture of knife was dry before and wet afterwards, weight of bowl was heavier before and lighter afterwards, weight of the bowl was heavier before and lighter afterwards, location of the mixture was in the bowl before and on the grapefruit afterwards, wetness of the knife was dry before and wetter afterwards, location of mixture was in bowl before and on fruit afterwards, cleanness of knife was clean before and dirty afterwards, size of grapefruit was whole before and halved afterwards, location of mixture was in bowl before and on grapefruit afterwards\n###\n"}
{"prompt": "In a small bowl, mix the crushed cornflakes, peanut butter, and butter together. Using a knife, spread the mixture over the grapefruit half. Keep an eye on it as is broils, to avoid burning. Now, what happens?\n", "completion": "temperature of pan was room temperature before and heated afterwards, temperature of grapefruit was cooler before and warmer afterwards, temperature of stove was cold before and hot afterwards, temperature of butter was room temperature before and heated afterwards, state of grapefruit was raw before and cooked afterwards, focus of you was focused elsewhere before and focused on the grapefruit afterwards, temperature of grapefruit was cold before and hot afterwards, temperature of grapefruit was room temperature before and heated afterwards, temperature of cornflakes was room temperature before and heated afterwards, state of sugar was in granules before and carmelized afterwards\n###\n"}
{"prompt": "In a small bowl, mix the crushed cornflakes, peanut butter, and butter together. Using a knife, spread the mixture over the grapefruit half. Keep an eye on it as is broils, to avoid burning. Serve. Now, what happens?\n", "completion": "location of bowl was in storage before and in use afterwards, weight of bowl was lighter before and heavier afterwards, location of grapefruit was in oven before and on plate afterwards, state of the grapefruit was being prepared before and being served afterwards, location of spoon was in storage before and in use afterwards, cleanness of spoon was clean before and dirty afterwards\n###\n"}
{"prompt": "Plant lemon thyme in a sunny and sheltered position. Now, what happens?\n", "completion": "location of plant was in pot before and in ground afterwards, cleanness of shovel was clean before and dirty afterwards, state of tyme was in pot before and planted afterwards, cleanness of hands was clean before and dirty afterwards, ownership of thyme was in store before and bought by you afterwards, lemon location of lemon thyme was in pot before and planted in sunny position afterwards\n###\n"}
{"prompt": "Plant lemon thyme in a sunny and sheltered position. Make sure the soil is good. Now, what happens?\n", "completion": "There will be no change.\n###\n"}
{"prompt": "Plant lemon thyme in a sunny and sheltered position. Make sure the soil is good. Ensure that lemon thyme has adequate water during the warmer months. Now, what happens?\n", "completion": "wetness of thyme was dry before and watered afterwards, color of thyme was yellowing before and green afterwards, moisture of thyme was dry before and wet afterwards, wetness of plant was dry before and watered afterwards, moisture of watering can was dry before and wet afterwards, moisture of soil was dry before and wet afterwards, water amount of plant was dry before and well watered afterwards\n###\n"}
{"prompt": "Plant lemon thyme in a sunny and sheltered position. Make sure the soil is good. Ensure that lemon thyme has adequate water during the warmer months. Keep the lemon thyme area well weeded. Now, what happens?\n", "completion": "weed amount of plant was covered in weeds before and well weeded afterwards, cleanness of gloves was clean before and dirty afterwards, location of weeds was surrounding plant area before and removed from area afterwards, cleanness of area was overgrown with weeds before and neatened afterwards, location of weeds was in the soil before and discarded afterwards, living state of weeds was alive before and dead afterwards\n###\n"}
{"prompt": "Get out the guides for your current video games and look at the Achievements are listed. Now, what happens?\n", "completion": "state of video game was turned off before and on afterwards, achievements of achievements was unknown before and known afterwards, availability of guides was put away before and brought out afterwards, guide of guide was put away before and out afterwards, location of guides was put away before and now out afterwards, orientation of book guide was closed before and open afterwards, location of book guide was on the shelf before and on the table afterwards, state of web browser was blank before and showing a digital game guide afterwards\n###\n"}
{"prompt": "Get out the guides for your current video games and look at the Achievements are listed. You don&#x27;t have to be an expert, major-league gamer to get a high Gamerscore. Now, what happens?\n", "completion": "knowledge of person was uneducated before and an expert afterwards\n###\n"}
{"prompt": "Get out the guides for your current video games and look at the Achievements are listed. You don&#x27;t have to be an expert, major-league gamer to get a high Gamerscore. Browse the Internet for tips and tricks to help you get your Gamerscore higher. Now, what happens?\n", "completion": "tips of tips was unknown before and known afterwards, location of game guide was loading before and on the screen afterwards, knowledge of you was uninformed before and informed afterwards, tricks of tricks was unknown before and known afterwards, gamer score of gamer score was lower before and higher afterwards, state of computer was off before and on afterwards, state of browser was blank before and searched for a game guide afterwards, browser of browser was closed before and open afterwards\n###\n"}
{"prompt": "Get out the guides for your current video games and look at the Achievements are listed. You don&#x27;t have to be an expert, major-league gamer to get a high Gamerscore. Browse the Internet for tips and tricks to help you get your Gamerscore higher. Play the campaign. Now, what happens?\n", "completion": "state of game was logged off before and logged on afterwards, state of xbox was idle before and loading the game afterwards, state of xbox controller was charging before and charged afterwards, location of person was standing before and sitting in front of the tv afterwards, state of you was browsing before and playing afterwards, campaign of campaign was unplayed before and played afterwards\n###\n"}
{"prompt": "Place all of the ingredients into the saucepan. Now, what happens?\n", "completion": "fullness of saucepan was empty before and full afterwards, weight of saucepan was lighter before and heavier afterwards, texture of molasses was thick before and runny afterwards, cleanness of saucepan was clean before and dirty afterwards, location of molasses was in jar before and in pan afterwards, organization of the ingredients was separate before and together afterwards, temperature of pan was cold before and hot afterwards, volume of the saucepan was empty before and filled afterwards, weight of the saucepan was lighter before and heavier afterwards, temperature of molasses was cold before and hot afterwards\n###\n"}
{"prompt": "Place all of the ingredients into the saucepan. Bring the ingredients to a boil. Now, what happens?\n", "completion": "temperature of ingredients was cooler before and hotter afterwards, state of butter was solid before and liquid afterwards, state of the liqiud was bubble free before and filled with large bubbles afterwards, organization of ingredients was seperate before and combinted afterwards, temperature of ingredients was cool before and hot afterwards, motion of ingredients was still before and boiling afterwards, temperature of molasses was cold before and hot afterwards, temperature of butter was cold before and hot afterwards, stability of the saucepan was still before and agitated afterwards, temperature of pan was cool before and hot afterwards, temperature of the saucepan was cold before and hot afterwards, state of the ingredients was solid before and melting afterwards\n###\n"}
{"prompt": "Place all of the ingredients into the saucepan. Bring the ingredients to a boil. Simmer for 10 minutes. Now, what happens?\n", "completion": "heating of mixture was boiling before and simmering afterwards, state of the liquid was moving with large bubbles before and moving with smaller bubbles afterwards, stability of the saucepan was rapidly moving before and less active afterwards, thickness of mixture was runnier before and thicker afterwards, volume of pan was empty before and full afterwards, volume of mixture was diluted before and condensed afterwards, temperature of pan was cold before and hot afterwards, cleanness of spoon was clean before and dirty afterwards, weight of pan was light before and heavy afterwards, temperature of the liquid was around 212 degrees fahrenheit before and closer to 190 degrees fahrenheit afterwards\n###\n"}
{"prompt": "Place all of the ingredients into the saucepan. Bring the ingredients to a boil. Simmer for 10 minutes. Pour over a pudding. Now, what happens?\n", "completion": "location of mixture was in pan before and on pudding afterwards, topping of desert was plain before and topped afterwards, volume of the saucepan was full before and empty afterwards, location of mixture was in a pot before and in a dish afterwards, moisture of desert was dry before and moist afterwards, location of the liquid was in a saucepan before and on the pudding afterwards, moisture of puddling was dry before and wet afterwards, state of pudding was plain before and topped afterwards, state of the pudding was plain before and covered afterwards, location of sauce was in a pot before and on a dish afterwards, temperature of the pudding was cooler before and hotter afterwards, volume of saucepan was full before and empty afterwards\n###\n"}
{"prompt": "Remove all dirty dishes and any leftover food from the cooktop surface. Now, what happens?\n", "completion": "location of food was on the stove before and in the trash afterwards, location of dishes was on the stovetop before and in the sink afterwards, area of cooktop was cluttered before and uncluttered afterwards, cleanness of leftovers was on cooktop before and put away afterwards, capacity of cleaning location was empty before and full afterwards, space of cooktop surface was cluttered before and empty afterwards, organization of stoe was cluttered before and empty afterwards, location of dishes was on surface before and placed to be cleaned afterwards, clean of dirty dishes was on cooktop before and moved to sink afterwards, cleanness of surface was cluttered before and free of objects afterwards, location of food was on surface before and placed to be cleaned afterwards\n###\n"}
{"prompt": "Remove all dirty dishes and any leftover food from the cooktop surface. Wash down the entire surface area of your cooktop after it cools. Now, what happens?\n", "completion": "cleanness of towel was clean before and dirty afterwards, temperature of cooktop was warm before and cooler afterwards, cleanness of surface was dirty before and clean afterwards, wetness of cooktop was dry before and wet afterwards, dryness of surface was dry before and wet afterwards, fullness of bucket was empty before and full afterwards, cleanness of stovetop was dirty before and clean afterwards, location of cleaner was in storage before and near stove afterwards, clean of dried food was on cooktop before and removed afterwards, wetness of water was on rag before and on cooktop afterwards, temperature of stove was warm before and cool afterwards, cleanness of cooktop was dirty before and cleaner afterwards, location of towel was in storage before and on stove afterwards, wetness of cooktop was dry before and wetter afterwards\n###\n"}
{"prompt": "Remove all dirty dishes and any leftover food from the cooktop surface. Wash down the entire surface area of your cooktop after it cools. Apply a non-abrasive stove top cleaner to the surface of the stove. Now, what happens?\n", "completion": "apperance of cooktop was dull before and shiny afterwards, cleanness of sponge was clean before and dirty afterwards, location of cleaner was in container before and on stove afterwards, location of cleaner bottle was storage before and near stove afterwards, weight of cleaner bottle was heavier before and lighter afterwards, clean of cooktop was stained before and cleaner afterwards, location of cleaner was in a bottle before and on the stove afterwards, moisture of towels was dry before and wet afterwards, wetness of surface was dry before and wet afterwards, cleanness of cooktop was dirty before and cleaner afterwards, cleanness of stove was dirty before and clean afterwards, texture of cooktop was smooth before and gritty afterwards\n###\n"}
{"prompt": "Remove all dirty dishes and any leftover food from the cooktop surface. Wash down the entire surface area of your cooktop after it cools. Apply a non-abrasive stove top cleaner to the surface of the stove. Rinse the cooktop surface thoroughly with clean water after cleaning. Now, what happens?\n", "completion": "wetness of cooktop was damp before and wet afterwards, cleanness of cooktop was dirty before and cleaner afterwards, dryness of surface was dry before and wet afterwards, composition of water was pure before and containing cleaning agents afterwards, clean of cooktop was soiled before and clean afterwards, location of water was in faucet / pipes before and on stove afterwards, cleanness of stove was soapy before and rinsed afterwards, location of soapy water was on the stove before and down the drain afterwards, clean of residue was on cooktop before and rinsed off afterwards, location of cleaner was near stove before and in storage afterwards, location of water was in pipes before and on the stove afterwards\n###\n"}
{"prompt": "Pour in any kind of juice like cranberry that you would like into a several paper cups, or an ice cube tray. Now, what happens?\n", "completion": "state of cups was empty before and full afterwards, state of juice was liquid before and solid afterwards, volume of tray was empty before and full afterwards, volume of paper cups was empty before and full afterwards, location of juice was in bottle before and in paper cups afterwards, moisture of paper cups was dry before and wet afterwards, location of juice was in bottle before and in tray afterwards, location of juice was in bottle before and in ice cube tray afterwards, volume of cup was empty before and full afterwards, weight of ice cube tray was empty before and filled with juice afterwards, moisture of tray was dry before and wet afterwards, cleanness of ice cube tray was clean before and dirty afterwards\n###\n"}
{"prompt": "Pour in any kind of juice like cranberry that you would like into a several paper cups, or an ice cube tray. Stick the spoon, or a wooden Popsicle stick, or plastic spoon into the juice, when you put the cups in the freezer when they are halfway frozen, mushy, and put it in just in right timing. Now, what happens?\n", "completion": "cleanness of popsicle stick was clean before and dirty afterwards, location of popsicle stick was in package before and in juice afterwards, temperature of cups was room temperature before and cold afterwards, location of popsicle sticks was on counter before and in juice afterwards, moisture of popsicle sticks was dry before and wet afterwards, location of spoon was in drawer before and in juice afterwards, temperature of popsicle sticks was room temperature before and cold afterwards, location of spoons was on counter before and in juicw afterwards, state of juice was liquid before and slushy afterwards, temperature of juice was warm before and cold afterwards, state of juice was liquid before and mushy afterwards, texture of juice was liquid before and slush afterwards\n###\n"}
{"prompt": "Pour in any kind of juice like cranberry that you would like into a several paper cups, or an ice cube tray. Stick the spoon, or a wooden Popsicle stick, or plastic spoon into the juice, when you put the cups in the freezer when they are halfway frozen, mushy, and put it in just in right timing. Now freeze your Juicesicles until they are frozen, or freeze for a day. Now, what happens?\n", "completion": "hardness of juice was liquid before and solid afterwards, location of juice was in fridge before and in freezer afterwards, location of ice cube tray was on the counter before and in the freezer afterwards, temperature of juice was cool before and cold afterwards, state of juicesicles was mushy before and solid afterwards, temperature of juicesicles was half frozen before and frozen afterwards, state of juice was liquid before and solid afterwards, state of juice was slushy before and frozen afterwards, temperature of tray was cool before and cold afterwards, location of juice was in cup before and out of cup afterwards\n###\n"}
{"prompt": "Pour in any kind of juice like cranberry that you would like into a several paper cups, or an ice cube tray. Stick the spoon, or a wooden Popsicle stick, or plastic spoon into the juice, when you put the cups in the freezer when they are halfway frozen, mushy, and put it in just in right timing. Now freeze your Juicesicles until they are frozen, or freeze for a day. Juicesicles out! Now, what happens?\n", "completion": "location of juicesicles was in ice cube tray before and in hand afterwards, location of ice cube tray was in freezer before and on the counter afterwards\n###\n"}
{"prompt": "######Gather all the items listed in the &quot;Things You&#x27;ll Need&quot; section near the bottom of this page. Now, what happens?\n", "completion": "state of list was unread before and read afterwards, location of the items was elsewhere before and gathered afterwards, organization of materiales was scattered before and assembled afterwards\n###\n"}
{"prompt": "######Gather all the items listed in the &quot;Things You&#x27;ll Need&quot; section near the bottom of this page. ######Put it all together in some sort of container. Now, what happens?\n", "completion": "organization of items was loose before and assembled afterwards, state of the items was outside before and inside afterwards, fullness of bag was empty before and full afterwards, weight of the container was lighter before and heavier afterwards, weight of container was light before and heavy afterwards, state of bag was empty before and full afterwards, volume of container was empty before and full afterwards, weight of bag was light before and heavy afterwards\n###\n"}
{"prompt": "######Gather all the items listed in the &quot;Things You&#x27;ll Need&quot; section near the bottom of this page. ######Put it all together in some sort of container. ######Make sure it is easy to open, since you&#x27;ll probably have to fumble for it in the dark. Now, what happens?\n", "completion": "There will be no change.\n###\n"}
{"prompt": "######Gather all the items listed in the &quot;Things You&#x27;ll Need&quot; section near the bottom of this page. ######Put it all together in some sort of container. ######Make sure it is easy to open, since you&#x27;ll probably have to fumble for it in the dark. ######Put it in a convenient spot. Now, what happens?\n", "completion": "location of bag was out before and put away afterwards, location of it was elsewhere before and now in a convenient spot afterwards, weight of drawer was lighter before and heavier afterwards, fullness of drawer was emptier before and more full afterwards\n###\n"}
{"prompt": "Put popcorn in a large bowl. Now, what happens?\n", "completion": "weight of bowl was lighter before and heavier afterwards, location of popcorn was in a pot before and in a bowl afterwards, state of corn kernals was intact before and popped open afterwards, fullness of bowl was empty before and full afterwards, cleanness of bowl was clean before and dirty afterwards, location of popcorn was in bag before and in bowl afterwards\n###\n"}
{"prompt": "Put popcorn in a large bowl. Put the butter in a saucepan. Now, what happens?\n", "completion": "cleanness of pan was clean before and dirty afterwards, weight of saucepan was lighter before and heavier afterwards, location of butter was in refrigerator before and in pan afterwards, temperature of butter was cool before and hot afterwards, size of butter was whole before and cut into pieces afterwards, temperature of butter was cold before and hot afterwards, state of butter was solid before and melted afterwards, temperature of pan was cool before and hot afterwards, state of butter was solid before and liquid afterwards\n###\n"}
{"prompt": "Put popcorn in a large bowl. Put the butter in a saucepan. Stir chilli powder and garlic powder into melted butter with wooden spoon. Now, what happens?\n", "completion": "moisture of seasonings was dry before and wet afterwards, taste of popcorn was plain before and seasoned afterwards, color of butter was yellow before and brownish red afterwards, composition of butter, chili powder and garlic powder was separate before and mixed afterwards, temperature of chili powder and garlic powder was cool before and hot afterwards, cleanness of spoon was clean before and dirty afterwards, temperature of butter was cooler before and warmer afterwards, composition of cheese was a block before and shredded afterwards, state of ingredients was seperated before and mixed afterwards\n###\n"}
{"prompt": "Put popcorn in a large bowl. Put the butter in a saucepan. Stir chilli powder and garlic powder into melted butter with wooden spoon. Put the popcorn in the container and cover. Now, what happens?\n", "completion": "openness of container was open before and closed afterwards, location of popcorn was in bowl before and in container afterwards, weight of container was lighter before and heavier afterwards, cleanness of container was clean before and dirty afterwards, state of pocorn was open before and sealed afterwards, weight of bowl was heavier before and lighter afterwards\n###\n"}
{"prompt": "Prepare the MDF for finishing. Now, what happens?\n", "completion": "state of mdf was unprepared before and prepared afterwards\n###\n"}
{"prompt": "Prepare the MDF for finishing. Determine the type of finish desired. Now, what happens?\n", "completion": "knowledge of the type of finish was undetermined before and determined afterwards, knowledge of finish was unselected before and selected afterwards, knowledge of the type of finish was undetermined before and determined afterwards\n###\n"}
{"prompt": "Prepare the MDF for finishing. Determine the type of finish desired. Initiate the finishing process. Now, what happens?\n", "completion": "state of the finishing process was unitiated before and initiated afterwards, cleanness of brush was clean before and dirty afterwards, moisture of brush was dry before and wet afterwards, state of the process was unitiated before and initiated afterwards, moisture of board was dry before and wet afterwards, location of primer was in bucket before and on board afterwards\n###\n"}
{"prompt": "Prepare the MDF for finishing. Determine the type of finish desired. Initiate the finishing process. Apply the sealant. Now, what happens?\n", "completion": "state of the board was dry before and wet afterwards, volume of the bucket was fuller before and less full afterwards, location of sealant was in bucket before and on board afterwards, wetness of the wood was dry before and wet afterwards, cleanness of brush was clean before and dirty afterwards, moisture of brush was dry before and wet afterwards, state of the brush was dry before and wet afterwards, weight of the board was lighter before and heavier afterwards, state of the wood was unsealed before and sealed afterwards, location of the sealant was off the wood before and on the wood afterwards, moisture of board was dry before and wet afterwards, material of mdf was plain before and sealed afterwards\n###\n"}
{"prompt": "Get a small pot and combine the salt, cornstarch, sugar, and a 1/2 cup of coconut milk. Now, what happens?\n", "completion": "wetness of salt, cornstarch, sugar was dry before and wet afterwards, composition of salt, cornstarch, sugar and milk was separate before and mixed afterwards, location of ingredients was in their place before and in pot afterwards, cleanness of pot was clean before and dirty afterwards, location of ingredients was in pantry before and on table afterwards, state of ingredients was separate before and mixed afterwards, weight of pot was lighter before and heavier afterwards, moisture of cornstarch, sugar and salt was dry before and wet afterwards, state of ingredients was separate before and combined afterwards\n###\n"}
{"prompt": "Get a small pot and combine the salt, cornstarch, sugar, and a 1/2 cup of coconut milk. Heat the ingredients on low heat and pour in the rest of the coconut milk. Now, what happens?\n", "completion": "temperature of ingredients was cooler before and hot afterwards, temperature of pot was cooler before and hot afterwards, location of milk was on counter before and in pan afterwards, location of rest of the coconut milk was in it's place before and in pot afterwards, temperature of ingredients was cool before and hot afterwards, temperature of mixture was cool before and hotter afterwards, taste of ingredients was bland before and tasty afterwards, weight of pot was lighter before and heavier afterwards, state of ingredients was cool before and warm afterwards\n###\n"}
{"prompt": "Get a small pot and combine the salt, cornstarch, sugar, and a 1/2 cup of coconut milk. Heat the ingredients on low heat and pour in the rest of the coconut milk. Wait until you get a clear, but thick liquid so that it can coat a spoon. Now, what happens?\n", "completion": "composition of ingredients was raw before and cooked afterwards, consistency of mixture was thinner before and thicker afterwards, thickness of liquid was thinner before and thick afterwards, taste of ingredients was bland before and tasty afterwards\n###\n"}
{"prompt": "Get a small pot and combine the salt, cornstarch, sugar, and a 1/2 cup of coconut milk. Heat the ingredients on low heat and pour in the rest of the coconut milk. Wait until you get a clear, but thick liquid so that it can coat a spoon. Get a shallow pan (flat baking pan is good) and pour the mixture in. Now, what happens?\n", "completion": "weight of shallow pan was lighter before and heavier afterwards, location of mixture was in pot before and in shallow pan afterwards, location of mixture was in pot before and in pan afterwards, state of pan was empty before and full afterwards, fullness of shallow pan was empty before and fuller afterwards, location of mixture was in pot before and pan afterwards, shape of mixture was round before and flat afterwards, cleanness of shallow pan was clean before and dirty afterwards\n###\n"}
{"prompt": "Mix the linseed oil and malt vinegar together. Now, what happens?\n", "completion": "composition of the linseed oil and malt vinegar was separate before and mixed together afterwards, composition of oil and vinegar was in separate containers before and mixed together afterwards, state of ingredients was separate before and mixed afterwards, location of vinegar was in a container before and mixed with the oil afterwards, texture of bowl was unused before and sticky afterwards, location of linseed oil was in a bottle before and in the bowl afterwards, cleanness of container was new before and used afterwards\n###\n"}
{"prompt": "Mix the linseed oil and malt vinegar together. Shake the mixture together in a bottle. Now, what happens?\n", "completion": "texture of glass was dry before and sticky afterwards, composition of the mixture was less combined before and well combined afterwards, volume of bowl was full before and empty afterwards, location of oil and vinegar was in other containers before and in one bottle afterwards, cleanness of bottle was clean before and used afterwards, state of mixture was still before and shaken afterwards, temperature of ingredients was separated before and mixed together afterwards\n###\n"}
{"prompt": "Mix the linseed oil and malt vinegar together. Shake the mixture together in a bottle. Dampen a soft cloth with the mixture. Now, what happens?\n", "completion": "wetness of cloth was dry before and wetter afterwards, texture of hands was clean before and sticky afterwards, texture of cloth was dry before and wet afterwards, weight of the cloth was lighter before and heavier afterwards, volume of mixture was fuller before and emptier afterwards, state of cloth was dry before and wet afterwards, wetness of the cloth was dry before and wet afterwards, temperature of fingers was warmer before and colder afterwards\n###\n"}
{"prompt": "Mix the linseed oil and malt vinegar together. Shake the mixture together in a bottle. Dampen a soft cloth with the mixture. Wipe over the over-polished area until the polish lifts. Now, what happens?\n", "completion": "movement of hand was still before and moving afterwards, location of cloth was on table before and in hand afterwards, texture of surface was rougher before and waxier afterwards, state of furniture was dull before and polished afterwards, thickness of area was thick with polish before and thinned out afterwards, state of the area was over polished before and less polished afterwards, location of polish was on surface before and in cloth afterwards\n###\n"}
{"prompt": "On your computer, go to . Now, what happens?\n", "completion": "state of psp was off before and on afterwards, orientation of person was standing before and sitting afterwards, age of firmware was old before and updated afterwards, availability of internet connection was unavailable before and available afterwards, location of psp was absent before and present afterwards, state of computer was off before and on afterwards, state of google was searched before and loaded afterwards\n###\n"}
{"prompt": "On your computer, go to . Go into the Internet Browser on your PSP. Now, what happens?\n", "completion": "knowledge of ability to find browser was missing before and present afterwards, state of search on google for psp games was missing before and completed afterwards, state of browser was closed before and open afterwards, orientation of person was empty handed before and holding the psp afterwards, state of psp was blank before and on the internet browser afterwards, state of psp browser was missing before and running afterwards, state of firefox was undownloaded before and downloaded afterwards\n###\n"}
{"prompt": "On your computer, go to . Go into the Internet Browser on your PSP. You can log into Yahoo Mail on your PSP. Now, what happens?\n", "completion": "state of email was logged out before and logged in afterwards, state of mail was unaccessed before and accesses afterwards, state of music on psp was unloaded before and loaded afterwards, state of yahoo mail account was missing before and present afterwards, state of webpage was signed out before and signed in afterwards, state of search for bowman 2 was unfinished before and finished afterwards\n###\n"}
{"prompt": "On your computer, go to . Go into the Internet Browser on your PSP. You can log into Yahoo Mail on your PSP. Search Youtube for portals and how to install them. Now, what happens?\n", "completion": "action of youtube website was idle before and being searched afterwards, state of youtube was considered before and searched afterwards, location of god of war was missing before and downloaded afterwards, location of dragon ball z was missing before and downloaded afterwards, location of tekken 6 was missing before and downloaded afterwards\n###\n"}
{"prompt": "Look for a lime by type. Now, what happens?\n", "completion": "state of lime was selected before and purchased afterwards, knowledge of lime was unselected before and selected afterwards, focus of you was at doing something else before and now looking for a type of lime afterwards, focus of you was looking for any lime before and looking for lime by type afterwards\n###\n"}
{"prompt": "Look for a lime by type. Look for limes that have unbroken skin and no blemishes. Now, what happens?\n", "completion": "knowledge of limes was unselected before and selected afterwards, focus of you was looking for a lime type before and looking for a lime with unbroken skin and without blemishes afterwards, focus of you was looking for any lime before and looking for a perfect lime afterwards\n###\n"}
{"prompt": "Look for a lime by type. Look for limes that have unbroken skin and no blemishes. It should be firm and heavy for its size. Now, what happens?\n", "completion": "state of hand was open before and closed afterwards\n###\n"}
{"prompt": "Look for a lime by type. Look for limes that have unbroken skin and no blemishes. It should be firm and heavy for its size. Store limes in the refrigerator. Now, what happens?\n", "completion": "temperature of the limes was warmer before and cooler afterwards, location of the limes was elsewhere before and stored in a refrigerator afterwards, temperature of limes was roome temperature before and cool afterwards, state of lime was warm before and cool afterwards, location of the lime was outside of the fridge before and in the fridge afterwards, volume of fridge was empty before and full afterwards\n###\n"}
{"prompt": "Look for a combination of mixture elements that will provide good drainage. Now, what happens?\n", "completion": "ownership of elements was owned by nursery before and yours afterwards, location of water was in soil before and drained away afterwards, organization of elements was seperate before and mixed afterwards, density of soil was compacted before and aerated afterwards, composition of soil was draining poorly before and amended to drain better afterwards, location of elements was at nursery before and in your home afterwards, state of drainage was difficult before and encouraged afterwards, state of soil was compacted before and aerated afterwards\n###\n"}
{"prompt": "Look for a combination of mixture elements that will provide good drainage. Make a mixture out of any of the following items combined with quality potting mixture suitable for seedlings: Now, what happens?\n", "completion": "composition of items was separate before and mixed afterwards, volume of pot was empty before and full afterwards, cleanness of pot was clean before and dirty afterwards, weight of pot was light before and heavy afterwards, composition of soil components was separate before and mixed afterwards, location of elements was on bench before and on ground afterwards, location of soil was in bag before and in pot afterwards\n###\n"}
{"prompt": "Look for a combination of mixture elements that will provide good drainage. Make a mixture out of any of the following items combined with quality potting mixture suitable for seedlings: Place rooting hormone on the base of the cutting prior to insertion into the mixture. Now, what happens?\n", "completion": "moisture of cutting was dry before and wet afterwards, state of roots was unstimulated before and stimulated afterwards, ownership of hormone was in nursery before and bought by owner afterwards, location of hormone was in bottle before and on roots afterwards, strength of cutting was newly cut before and treated with hormone afterwards, location of hormone was at nursery before and at home afterwards, location of hormone was on shelf before and on cutting afterwards, location of hormone was in bottle before and on plant afterwards, activation of cutting was lone before and activated by hormone afterwards, orientation of hormone was in bag before and on end of rooting cutting afterwards, ownership of hormone was owned by nursery before and yours afterwards, location of cutting was in air before and in soil afterwards\n###\n"}
{"prompt": "Look for a combination of mixture elements that will provide good drainage. Make a mixture out of any of the following items combined with quality potting mixture suitable for seedlings: Place rooting hormone on the base of the cutting prior to insertion into the mixture. Water the cutting thoroughly on planting. Now, what happens?\n", "completion": "state of cutting was on counter before and planted afterwards, location of water was in hose before and in soil afterwards, moisture of cutting was dry before and wet afterwards, moisture of soil was dry before and wet afterwards, location of cutting was on counter before and in pot afterwards, location of water was in hose before and in pot afterwards, moisture of cuttings was dry before and wet afterwards, moisture of pot was dry before and wet afterwards\n###\n"}
{"prompt": "######Tack or pin the piece of paper on which the copy is to be made onto the pattern. Now, what happens?\n", "completion": "state of window was uncovered before and covered afterwards, paper of paper was in hand before and taped to pattern holder afterwards, location of tape was on roll before and on window afterwards, state of window was bare before and covered afterwards, thickness of pattern piece was single layered before and double layered afterwards\n###\n"}
{"prompt": "######Tack or pin the piece of paper on which the copy is to be made onto the pattern. ######Take your preferred tracing item. Now, what happens?\n", "completion": "location of tracing pen was in drawer before and in hand afterwards\n###\n"}
{"prompt": "######Tack or pin the piece of paper on which the copy is to be made onto the pattern. ######Take your preferred tracing item. The process of tracing is easy enough, so long as the hand does not get tired. Now, what happens?\n", "completion": "state of hand was down before and up afterwards\n###\n"}
{"prompt": "######Tack or pin the piece of paper on which the copy is to be made onto the pattern. ######Take your preferred tracing item. The process of tracing is easy enough, so long as the hand does not get tired. Remove when completed. Now, what happens?\n", "completion": "state of window was covered before and stenciled afterwards, state of paper was on window before and removed afterwards, state of window was covered before and uncovered afterwards, paper of paper was taped before and removed afterwards\n###\n"}
{"prompt": "Wash the chamois in warm, soapy water. Now, what happens?\n", "completion": "wetness of chamois was dry before and wet afterwards, state of the chamois was dry before and wet afterwards, state of chaois was dry before and wet afterwards, container of sink was empty before and full afterwards, state of soap bottle was full before and less full afterwards, location of soap bottle was on the kitchen counter before and in a hand afterwards, state of bucket was empty before and full of water afterwards, composition of water was pure before and soapy afterwards, cleanness of the chamois was dirty before and cleaner afterwards, location of the chamois was out of water before and in water afterwards, location of water was in the pipes before and in the bucket afterwards, weight of the chamois was lighter before and heavier afterwards, location of water was absent before and in sink afterwards\n###\n"}
{"prompt": "Wash the chamois in warm, soapy water. Fold the chamois over several times and wring out thoroughly. Now, what happens?\n", "completion": "location of chamois was in sink before and out of sink afterwards, wetness of chamois was soaking before and dryer afterwards, wetness of the chamois was wetter before and dryer afterwards, orientation of hand was in the water before and holding the chamois afterwards, cleanness of water was clean before and dirty afterwards, shape of the chamois was flat before and folded afterwards, cleanness of chamois was dirty before and becoming clean afterwards, weight of the chamois was heavier before and lighter afterwards, state of chamois was dry before and wet afterwards, shape of chamois was flat before and folded afterwards, state of chamois was flat before and folded afterwards, location of the chamois was in water before and out of water afterwards, form of chamois was loose before and tight afterwards\n###\n"}
{"prompt": "Wash the chamois in warm, soapy water. Fold the chamois over several times and wring out thoroughly. Rinse the chamois thoroughly. Now, what happens?\n", "completion": "cleanness of chamois was soapy before and rinsed of soap afterwards, state of faucet was off before and on afterwards, state of chamois was dirty before and rinsed afterwards, location of chamois was in the bucket before and under the faucet afterwards, state of chamois was soapy before and rinsed afterwards, state of the was soapy before and rinsed afterwards\n###\n"}
{"prompt": "Wash the chamois in warm, soapy water. Fold the chamois over several times and wring out thoroughly. Rinse the chamois thoroughly. Hang the chamois up to dry. Now, what happens?\n", "completion": "state of chamois was wet before and drying afterwards, temperature of chamois was cold before and warming afterwards, wetness of chamois was wet before and dry afterwards, location of the was being rinsed before and hanging up to dry afterwards, state of chamois was wet before and dry afterwards, shape of chamois was folded before and flat afterwards, location of chamois was in the hand before and on the metal rack afterwards\n###\n"}
{"prompt": "Combine the ingredients in a small plastic zipped bag. Now, what happens?\n", "completion": "location of ingredients was out of the bag before and inside the bag afterwards, location of ingredients was in original package before and in plastic bag afterwards, form of zipper was open before and closed afterwards, fulness of plastic bag was empty before and full afterwards, shape of bag was flat before and rounded afterwards, composition of cookies was whole before and crushed afterwards, location of powder was in a container before and in the bag afterwards, fullness of bag was empty before and full afterwards, weight of bag was lighter before and heavier afterwards, state of ingredients was separate before and mixed afterwards, volume of plastic bag was empty before and full afterwards, cleanness of plastic bag was clean before and dirty afterwards\n###\n"}
{"prompt": "Combine the ingredients in a small plastic zipped bag. Line the inside of a coffee mug with tissue paper. Now, what happens?\n", "completion": "weight of mug was lighter before and heavier afterwards, area of tissue paper was in package before and in covering inside of mug afterwards, material of coffee mug was empty before and covered with tissue paper inside afterwards, thickness of mug was bare before and lined with paper afterwards, location of mug was in cupboard before and in hand afterwards, shape of tissue paper was smooth before and wrinkled afterwards, fullness of mug was empty before and full afterwards, fullness of mug was empty before and somewhat full afterwards, location of tissue paper was in a container before and in a mug afterwards, location of tissue paper was in a package before and in a mug afterwards, shape of paper was flat before and wrinkled afterwards\n###\n"}
{"prompt": "Combine the ingredients in a small plastic zipped bag. Line the inside of a coffee mug with tissue paper. Add the plastic bag with a small whisk in the mug. Now, what happens?\n", "completion": "weight of mug was lighter before and heavier afterwards, location of whisk was on the counter before and in the mug afterwards, location of plastic bag was on the counter before and in the mug afterwards, order of paper was topmost in the mug before and bottommost in the mug afterwards, location of plastic bag was on counter before and in mug afterwards, location of whisk was in a package before and in the mug afterwards, location of zip bag was on the counter before and in the mug afterwards, weight of mug was light before and heavy afterwards\n###\n"}
{"prompt": "Combine the ingredients in a small plastic zipped bag. Line the inside of a coffee mug with tissue paper. Add the plastic bag with a small whisk in the mug. Attach a decorative tag to the mug. Now, what happens?\n", "completion": "writing of tag was blank before and written on afterwards, organization of rope was untied before and tied in a bow afterwards, location of decorative tag was in package before and on mug afterwards, state of mug was unlabeled before and labeled afterwards, identifiable yes or no of mix was unidentifiable before and identifiable afterwards, location of tag was on the counter before and attached to the mug afterwards, composition of decorative tag was blank before and written on afterwards, location of tag was on counter before and attached to mug afterwards\n###\n"}
{"prompt": "On Halo 1, a shotgun will take care of Combat Forms in the most expedient way possible (excepting a rocket launcher or any type of explosive). Now, what happens?\n", "completion": "state of shotgun was unfired before and fired afterwards, state of you was losing game before and defeating in combat afterwards, state of shotgun was needed before and purchased afterwards, state of flood was undefeated before and defeated afterwards\n###\n"}
{"prompt": "On Halo 1, a shotgun will take care of Combat Forms in the most expedient way possible (excepting a rocket launcher or any type of explosive). On Halo 3, there are Flood Pure Forms, which are a lot harder to kill. Now, what happens?\n", "completion": "resistance of forms was random before and pure afterwards\n###\n"}
{"prompt": "On Halo 1, a shotgun will take care of Combat Forms in the most expedient way possible (excepting a rocket launcher or any type of explosive). On Halo 3, there are Flood Pure Forms, which are a lot harder to kill. For Halo 3 The Flood can be generally be easily killed on any difficulty, the only time they put up a decent fight is when you are playing on Heroic difficulty, and they can be an actual challenge when you play on Legendary difficulty. Now, what happens?\n", "completion": "state of flood was easy before and hard afterwards, difficulty level of play was set to normal before and heroic difficulty afterwards\n###\n"}
{"prompt": "On Halo 1, a shotgun will take care of Combat Forms in the most expedient way possible (excepting a rocket launcher or any type of explosive). On Halo 3, there are Flood Pure Forms, which are a lot harder to kill. For Halo 3 The Flood can be generally be easily killed on any difficulty, the only time they put up a decent fight is when you are playing on Heroic difficulty, and they can be an actual challenge when you play on Legendary difficulty. When you encounter a Tank Flood Form,UNSC weapons are weak against these huge things!If you find an Energy Sword or rocket launcher,and fuel rod cannon kill them quickly they can also pack a punch! Now, what happens?\n", "completion": "strength of unsc weapons was weak before and strong afterwards, knowledge of player was inexperienced before and experienced afterwards\n###\n"}
{"prompt": "Put all of the ingredients into a small to medium sized bowl. Now, what happens?\n", "completion": "knowledge of knowledge of what ranch seasoning is was absent before and is present afterwards, state of the ingredients was separate before and now combined afterwards, location of ingredients was in packs before and in the bowl afterwards, emptiness of bowl was empty before and full afterwards, cleanness of bowl was clean before and dirty afterwards, weight of the bowl was lighter before and heavier afterwards, location of buttermilk was in fridge before and in bowl afterwards, location of mayo was in fridge before and in bowl afterwards, volume of bowl was empty before and fuller afterwards, location of herbs and spices was in spice rack before and in bowl afterwards\n###\n"}
{"prompt": "Put all of the ingredients into a small to medium sized bowl. Whisk them all together. Now, what happens?\n", "completion": "state of ingredients was separated before and mixed afterwards, location of ingredients was on table before and put away afterwards, location of whisk was in cabinet before and in hand afterwards, state of ranch dressing was unwhisked before and whisked afterwards, power of hand blender was stopped before and turned on afterwards, cleanness of hand blender was clean before and dirty afterwards, state of dressing mix was untasted before and tasted afterwards, composition of ingredients was separated before and combined afterwards, composition of the ingredients was spread out before and combined afterwards\n###\n"}
{"prompt": "Put all of the ingredients into a small to medium sized bowl. Whisk them all together. Store it in an airtight container. Now, what happens?\n", "completion": "state of dressing container was uncovered before and covered afterwards, state of table was dirty before and cleaned up afterwards, location of the ingredients was in a bowl before and in a jar afterwards, location of container was in cabinet before and on table afterwards, cleanness of container was clean before and dirty afterwards, emptiness of container was empty before and full afterwards, weight of the jar was lighter before and heavier afterwards, emptiness of bowl was full before and empty afterwards, location of ingredients was in bowl before and in container afterwards, location of ingredients was in the bowl before and in the container afterwards, location of dressing was in bowl before and in container afterwards\n###\n"}
{"prompt": "Put all of the ingredients into a small to medium sized bowl. Whisk them all together. Store it in an airtight container. Note when the seasoning is made. Now, what happens?\n", "completion": "state of calendar was absent before and present afterwards, location of pen/pencil was on its place before and in the hand afterwards, location of masking tape was in drawer before and on container afterwards, knowledge of date was unknown before and known afterwards, location of magic marker was in drawer before and in hand afterwards, state of note paper was clean before and used afterwards, location of note paper was in its place before and in/on the container afterwards\n###\n"}
{"prompt": "######Mix together the baking soda, borax and washing soda. Now, what happens?\n", "completion": "location of baking soda was in a box before and in a bowl afterwards, weight of bowl was lighter before and heavier afterwards, composition of ingredients was separate before and combined afterwards, location of washing soda was in container before and in mixing bowl afterwards, location of borax was in container before and in mixing bowl afterwards, location of mixing bowl was in storage before and in use afterwards, location of baking soda was in container before and in mixing bowl afterwards, cleanness of spoon was clean before and dirty afterwards, cleanness of bowl was clean before and dirty afterwards, state of the baking soda, borax and washing soda was separate before and mixed together afterwards\n###\n"}
{"prompt": "######Mix together the baking soda, borax and washing soda. ######Add enough liquid soap to make it into a paste of even consistency. Now, what happens?\n", "completion": "moisture of powders was dry before and moist afterwards, location of dish soap was in container before and in bowl afterwards, weight of bowl was lighter before and heavier afterwards, location of dish soap dispenser was in storage before and in use afterwards, consistency of mixture was thinner before and thicker afterwards, dryness of mixture was dry before and wet / pasty afterwards, location of liquid soap was in a bottle before and in a bowl afterwards, weight of bowl was less full before and more full afterwards, state of the liquid soap was separate before and mixed with the paste afterwards, moisture of spoon was dry before and wet afterwards, composition of the paste was an uneven consistency before and an even consistency afterwards\n###\n"}
{"prompt": "######Mix together the baking soda, borax and washing soda. ######Add enough liquid soap to make it into a paste of even consistency. ######Place the mixture into a squirt bottle. Now, what happens?\n", "completion": "location of mixing bowl was in use before and ready to be washed afterwards, weight of the bottle was lighter before and heavier afterwards, weight of mixing bowl was full before and empty afterwards, location of spray bottle was in storage before and in use afterwards, fullness of squirt bottle was empty before and full afterwards, weight of bottle was lighter before and heavier afterwards, cleanness of bottle mouth was clean before and dirty afterwards, location of the mixture was outside of the bottle before and inside the bottle afterwards, state of the bottle was dry before and wet afterwards, weight of bowl was heavier before and lighter afterwards, location of mixture was in mixing bowl before and in spray bottle afterwards\n###\n"}
{"prompt": "######Mix together the baking soda, borax and washing soda. ######Add enough liquid soap to make it into a paste of even consistency. ######Place the mixture into a squirt bottle. ######Use for cleaning bathroom surfaces such as the shower, tiles, basin, and toilet. Now, what happens?\n", "completion": "cleanness of tiles was dirty before and clean afterwards, moisture of tile was dry before and wet afterwards, clarity of surfaces was dingy before and reflective afterwards, cleanness of surfaces was dirty before and clean afterwards, weight of spray bottle was full before and less full afterwards, state of the paste was in a bottle before and being used afterwards, cleanness of surface was dirty before and cleaner afterwards, fullness of spray bottle was full before and somewhat empty afterwards, location of mixture was in squirt bottle before and on surfaces afterwards\n###\n"}
{"prompt": "Don&#x27;t run unless you&#x27;re making a mad break for cover or you absolutely have to. Now, what happens?\n", "completion": "state of person was noticed before and unnoticed afterwards, speed of moves was fast before and slow afterwards, knowledge of you was unaware of when to run before and running only when you have to afterwards\n###\n"}
{"prompt": "Don&#x27;t run unless you&#x27;re making a mad break for cover or you absolutely have to. Normal or light breathing means awake or almost awake. Now, what happens?\n", "completion": "knowledge of you was unaware of what light breathing means before and now aware what light breathing means afterwards\n###\n"}
{"prompt": "Don&#x27;t run unless you&#x27;re making a mad break for cover or you absolutely have to. Normal or light breathing means awake or almost awake. Map out the area your going to be sneaking around in and take in every detail, especially hiding spots and alley ways. Now, what happens?\n", "completion": "knowledge of details was unnoticed before and noticed afterwards, knowledge of the area was unmapped before and now mapped out afterwards, organization of area was uncharted before and mapped out afterwards, knowledge of route was unplanned before and planned afterwards\n###\n"}
{"prompt": "Don&#x27;t run unless you&#x27;re making a mad break for cover or you absolutely have to. Normal or light breathing means awake or almost awake. Map out the area your going to be sneaking around in and take in every detail, especially hiding spots and alley ways. When being sneaky be high up or low to the ground if possible. Now, what happens?\n", "completion": "position of feet was flat on the ground before and only touching the ground with toes afterwards, height of you was unaware what height to be before and aware what height to be afterwards, knowledge of you was unaware what height to be before and aware what height to be afterwards, size of silhouette was tall before and short afterwards, location of hands was at their sides before and on the ground afterwards\n###\n"}
{"prompt": "Heat the saffron in a small metal bowl,on a very low a flame,shaking the bowl all the time so that saffron threads do not turn. Now, what happens?\n", "completion": "movement of the bowl was still before and being shaken afterwards, location of saffron was in bottle before and in metal bowl afterwards, temperature of saffron was room temperature before and warmer afterwards, temperature of saffron was cool before and heated afterwards, temperature of bowl was cooler before and hotter afterwards, movement of saffron was still before and shaken afterwards, state of saffron was raw before and cooked afterwards, temperature of saffron was cooler before and hotter afterwards, temperature of the saffron was cooler before and warmer afterwards, weight of the bowl was lighter before and heavier afterwards, location of the saffron was elsewhere before and in a bowl afterwards\n###\n"}
{"prompt": "Heat the saffron in a small metal bowl,on a very low a flame,shaking the bowl all the time so that saffron threads do not turn. When cooled,crush it with finger tips and keep aside.Heat ghee in a heavy bottomed pan,lower the flame,put in the vermicelli and fry till it turns into a light golden color.Pour 1/2 cup water.In a few minutes the vermicelli would be soft. Now, what happens?\n", "completion": "cleanness of pan was clean before and dirty afterwards, color of saffron was light yellow before and golden color afterwards, wholeness of saffron was whole before and crushed afterwards, shape of saffron was whole before and crushed afterwards, cleanness of fingers was clean before and dirtier afterwards, color of the vermicelli was a different color before and light golden afterwards, temperature of ghee was cooler before and hot afterwards, temperature of the saffron was warm before and cooled afterwards, temperature of saffron was hot before and cool afterwards, state of the saffron was whole before and crushed afterwards, size of saffron was whole before and crushed afterwards, texture of ghee was thick before and thinner afterwards\n###\n"}
{"prompt": "Heat the saffron in a small metal bowl,on a very low a flame,shaking the bowl all the time so that saffron threads do not turn. When cooled,crush it with finger tips and keep aside.Heat ghee in a heavy bottomed pan,lower the flame,put in the vermicelli and fry till it turns into a light golden color.Pour 1/2 cup water.In a few minutes the vermicelli would be soft. Pour milk and cook it for 8 minutes.Add sugar and simmer for another few minutes.Cut blanched almonds and pistachios finely.Add half of these with charoli,cardamom powder,raisins,crushed saffron and rose essence.Either rose essence or saffron should be used to keep the flavor pure. Now, what happens?\n", "completion": "state of milk was raw before and cooked afterwards, temperature of milk was cool before and hot afterwards, shape of almonds and pistachios was whole before and cut afterwards, taste of flavorings was separate before and added to mix afterwards, state of milk was unoured before and poured afterwards, state of sugar was separate before and mixed in afterwards, temperature of milk was cooler before and hot afterwards, weight of the container of milk was heavier before and lighter afterwards, weight of milk container was heavier before and lighter afterwards, taste of milk was plain before and sugary afterwards, size of nuts was whole before and chopped afterwards, wholeness of almonds and pistachios was whole before and cut finely afterwards\n###\n"}
{"prompt": "Heat the saffron in a small metal bowl,on a very low a flame,shaking the bowl all the time so that saffron threads do not turn. When cooled,crush it with finger tips and keep aside.Heat ghee in a heavy bottomed pan,lower the flame,put in the vermicelli and fry till it turns into a light golden color.Pour 1/2 cup water.In a few minutes the vermicelli would be soft. Pour milk and cook it for 8 minutes.Add sugar and simmer for another few minutes.Cut blanched almonds and pistachios finely.Add half of these with charoli,cardamom powder,raisins,crushed saffron and rose essence.Either rose essence or saffron should be used to keep the flavor pure. Pour this ready Shirkhurma in a big glass bowl and garnish with remaining pieces of almond and pistachios. Now, what happens?\n", "completion": "location of shirkhurma was in pan before and in glass bowl afterwards, location of food was on stove before and in glass bowl afterwards, state of remaining almond and pistachio was separate before and mixed in afterwards, temperature of shirkhurma was hot before and warm afterwards, temperature of misture was cool before and warmer afterwards, state of the bowl was empty before and now full afterwards, cleanness of glass bowl was clean before and dirty afterwards, weight of the bowl was lighter before and heavier afterwards, location of mixture was in pot before and in bowl afterwards\n###\n"}
{"prompt": "Select food plants that like to climb and will enjoy the sunny position that pergolas usually sit in. Now, what happens?\n", "completion": "state of the food plants was needing selected before and selected afterwards, location of plants was in pots before and in soil afterwards, location of food plants was absent before and selected afterwards, location of plants was out of sun before and enjoying sun afterwards, ownership of plants was owned by nurseryman before and bought by you afterwards, location of plants was at nursery before and at your home afterwards, knowledge of plants was unselected before and selected afterwards, state of vines was absent before and climbing afterwards, state of pergola was bare before and covered afterwards\n###\n"}
{"prompt": "Select food plants that like to climb and will enjoy the sunny position that pergolas usually sit in. Be sure to provide a decent planting area that is easy to fertilise and water regularly. Now, what happens?\n", "completion": "location of water was in hose before and in soil afterwards, fertility of soil was unfertilised before and fertilised afterwards, state of soil was poor before and fertilized afterwards, improvement of planting area was poor before and good afterwards, availability of the area was needing provided before and provided afterwards, capacity of planting area was empty before and full afterwards, space of planter was crowded before and spacious afterwards, location of fertilizer was in bottle before and in soil afterwards, moisture of plant was dry before and wet afterwards, location of plants was absent before and in planting area afterwards\n###\n"}
{"prompt": "Select food plants that like to climb and will enjoy the sunny position that pergolas usually sit in. Be sure to provide a decent planting area that is easy to fertilise and water regularly. Each of the crops selected above are ideal for providing a lot of fruit toward the end of summer and into early autumn. Now, what happens?\n", "completion": "state of plant was in flower before and fruiting afterwards, location of crops was absent before and selected afterwards, knowledge of you was uninformed before and now informed afterwards, state of fruit was unripe before and ripe afterwards, time of season was summer before and autumn afterwards, weight of fruit was absent before and growing afterwards, time of summer was ending before and autumn afterwards, hardness of fruit was hard before and soft afterwards\n###\n"}
{"prompt": "Select food plants that like to climb and will enjoy the sunny position that pergolas usually sit in. Be sure to provide a decent planting area that is easy to fertilise and water regularly. Each of the crops selected above are ideal for providing a lot of fruit toward the end of summer and into early autumn. Keep training the vines in the direction that you find convenient. Now, what happens?\n", "completion": "size of vines was untrained before and trained afterwards, training of vines was growing randomly before and espeliared afterwards, state of the vines was growing independently before and being trained to grow in a specific direction afterwards, shape of vine direction was chaotic before and convenient afterwards, size of vines was whole before and cut afterwards, state of vines was unruly before and controlled afterwards, shape of vines was random before and purposefully pruned afterwards, state of pergola was bare before and covered afterwards\n###\n"}
{"prompt": "Tap on the inventory. Now, what happens?\n", "completion": "color of inventory was hidden before and visible afterwards, location of finger was touching air before and touching the screen afterwards, state of inventory slots was idle before and in use afterwards, ownership of torch was unpossessed before and possessesd afterwards, state of inventory was inactive before and activated afterwards, focus of player's focus was on main screen before and on the inventory afterwards, state of inventory bag was closed before and open afterwards, temperature of area was cool before and warm afterwards, location of inventory screen was hidden before and able to be seen afterwards\n###\n"}
{"prompt": "Tap on the inventory. Tap where you&#x27;d like to place the torch. Now, what happens?\n", "completion": "location of mouse cursor was on inventory slot before and moved to game screen afterwards, availability of inventory slot was occupied by torch before and empty afterwards, state of mouse cursor was idle before and being tapped afterwards, location of torch was in inventory before and placed in game afterwards, action of finger was touching air before and tapping the torch afterwards, location of torch was random before and placed afterwards, availability of torch was unavailable before and available afterwards\n###\n"}
{"prompt": "Tap on the inventory. Tap where you&#x27;d like to place the torch. If you need to remove a block where a torch is located, tap on the block. Now, what happens?\n", "completion": "location of torch was being held before and on the wall afterwards, orientation of block was part of the wall before and removed afterwards, availability of torch space was occupied by block before and empty of block afterwards, location of block was obstructing before and removed afterwards, state of mouse cursor was inactive before and being tapped afterwards, location of block was in the game before and removed afterwards, location of block was unmoved before and moved afterwards, focus of block was unchosen before and chosen afterwards, location of mouse cursor was on torch before and on block afterwards\n###\n"}
{"prompt": "Tap on the inventory. Tap where you&#x27;d like to place the torch. If you need to remove a block where a torch is located, tap on the block. Add a torch whenever your Blockhead&#x27;s status suggests that your Blockhead would like more light. Now, what happens?\n", "completion": "visibility of blockhead was dark before and light afterwards, brightness of game area was darker before and lit by torches afterwards, availability of inventory slots was full of torches before and empty afterwards, location of torch was in inventory before and added to game field afterwards, location of torch was in inventory before and on the wall afterwards, state of blockhead's status was needing more light before and satisfied by light afterwards, brightness of room was dark before and lit afterwards\n###\n"}
{"prompt": "Peel the skin off of the pear. Now, what happens?\n", "completion": "form of pear was covered with skin before and peeled afterwards, cleanness of peeler was clean before and dirty afterwards, cleanness of pear was dirty before and cleaner afterwards, moisture of pear was dry before and wet afterwards, moisture of peeler was dry before and wet afterwards, weight of pear was light before and lighter afterwards, location of peel was on the pear before and discarded afterwards, weight of the pear was heavier before and lighter afterwards, composition of the pear was covered in skin before and peeled afterwards, location of skin was on the pear before and off the pear afterwards, state of the skin was attached before and off afterwards, color of pear was green before and golden afterwards\n###\n"}
{"prompt": "Peel the skin off of the pear. Cut the pear into quarters and de-seed the pears. Now, what happens?\n", "completion": "composition of the pear was whole before and cut into quarters afterwards, state of the pears was seeded before and de-seeded afterwards, location of seeds was in pear before and out of pear afterwards, moisture of knife was dry before and wet afterwards, composition of pear was whole before and cut up afterwards, number of pear was whole before and in pieces afterwards, weight of pear was light before and lighter afterwards, form of pear was seeded before and unseeded afterwards, weight of the pears was heavier before and lighter afterwards, cleanness of knife was clean before and dirty afterwards, location of seeds was inside the pear before and discarded afterwards, size of pear was whole before and quartered afterwards\n###\n"}
{"prompt": "Peel the skin off of the pear. Cut the pear into quarters and de-seed the pears. Place pieces in a blender or food processor to puree with a few drops of lemon juice. Now, what happens?\n", "completion": "texture of pear was firmer before and softer afterwards, location of the pears was outside before and inside a blender afterwards, power of blender was off before and on afterwards, taste of pear was sweet before and tarter afterwards, location of lemon juice was in a container before and in the blender afterwards, container of blender was empty before and filled with baby food afterwards, cleanness of blender was clean before and dirty afterwards, location of pear pieces was outside of blender before and inside of blender afterwards, moisture of blender was dry before and wet afterwards, location of lemon juice was in bottle before and in blender afterwards, weight of the blender was lighter before and heavier afterwards, wetness of blender was dry before and wet afterwards\n###\n"}
{"prompt": "Peel the skin off of the pear. Cut the pear into quarters and de-seed the pears. Place pieces in a blender or food processor to puree with a few drops of lemon juice. Serve immediately or store in freezer. Now, what happens?\n", "completion": "location of puree was in blender before and in serving dish afterwards, location of baby food container was absent before and in freezer afterwards, location of baby food was in blender before and in freezer afterwards, state of the pears was being processed before and ready to be served or stored afterwards, container of freezer was empty before and filled with pear puree afterwards\n###\n"}
{"prompt": "Wash the towels that you&#x27;re going to use. Now, what happens?\n", "completion": "location of towels was in basket before and in machine afterwards, state of washing machine was dry before and wet afterwards, power of washer was off before and on afterwards, location of towels was in a pile before and in the washing machine afterwards, cleanness of towels was soiled before and clean afterwards, state of washing machine was empty before and filled with towels afterwards, wetness of towels was dry before and wet afterwards, power of washing machine was off before and on afterwards, moisture of towels was wet before and dry afterwards, cleanness of towels was dirty before and clean afterwards\n###\n"}
{"prompt": "Wash the towels that you&#x27;re going to use. Once the towels are wash and dried, set up your sewing machine. Now, what happens?\n", "completion": "state of sewing machine was unset before and ready to be used afterwards, state of towels was wet before and dry afterwards, condition of sewing machine was loosened thread before and threaded correctly afterwards, volume of washing machine was full before and empty afterwards, location of thread was on a spool before and through the needle afterwards, state of sewing machine was turned down before and turned on afterwards, organization of sewing machine was closed up before and set up afterwards, speed of dryer was spinning before and stopped afterwards, threading of needle was empty before and threaded afterwards, location of towels was in the washing machine before and in the dryer afterwards\n###\n"}
{"prompt": "Wash the towels that you&#x27;re going to use. Once the towels are wash and dried, set up your sewing machine. Fold each bath towel in half. Now, what happens?\n", "completion": "state of towels was unfolded before and folded in half afterwards, organization of towels was in disarray before and organized afterwards, location of thread was in the machine before and in the fabric afterwards, form of towels was messy before and neat afterwards, width of towels was flat before and folded in half afterwards, state of hands was empty before and holding towels afterwards, location of towels was in the dryer before and on sewing machine afterwards, position of towels was flat before and folded afterwards, shape of bath towels was flat before and folded afterwards, position of sewing machine foot was up before and down afterwards\n###\n"}
{"prompt": "Wash the towels that you&#x27;re going to use. Once the towels are wash and dried, set up your sewing machine. Fold each bath towel in half. Place on the ground. Now, what happens?\n", "completion": "form of towels was being folded before and in a pile afterwards, location of towels was on the sewing machine before and on the ground afterwards, location of towels was in hand before and on the ground afterwards, state of ground was naked before and covered with towel afterwards, location of towels was on table before and on ground afterwards\n###\n"}
{"prompt": "Prepare ramen noodles as directed on package, but discard the soup base. Now, what happens?\n", "completion": "hardness of noodles was hard before and soft afterwards, hydration of noodles was dehydrated before and rehydrated afterwards, location of soup base was in a package before and in the trash afterwards, state of soup base was in package before and discarded afterwards, texture of noodles was hard before and soft afterwards, temperature of water was cool before and boiling afterwards, cleanness of pot was clean before and less clean afterwards, availability of pot was empty before and filled with noodles afterwards, location of noodles was in package before and out of package and in pot afterwards, location of noodles was on shelf before and in pan afterwards, moisture of ramen noodles was dry before and wet afterwards, state of noodles was raw before and cooked afterwards, temperature of noodles was cool before and hot afterwards\n###\n"}
{"prompt": "Prepare ramen noodles as directed on package, but discard the soup base. Cook the chicken pieces until thoroughly cooked or browned. Now, what happens?\n", "completion": "cooked of meat was raw before and heated through afterwards, temperature of chicken was cold before and hot afterwards, temperature of meat was cold before and hot afterwards, state of chicken pieces was raw before and cooked afterwards, taste of chicken was inedible before and tasty afterwards, texture of chicken was tough before and tender afterwards, fullness of pan was empty before and full afterwards, weight of pan was lighter before and heavier afterwards, volume of pot was filled with noodles before and filled with noodles and chicken afterwards, color of chicken was pink before and browned afterwards, state of chicken was raw before and cooked afterwards, temperature of chicken pieces was cold before and warm afterwards\n###\n"}
{"prompt": "Prepare ramen noodles as directed on package, but discard the soup base. Cook the chicken pieces until thoroughly cooked or browned. Layer the bacon on top of the chicken. Now, what happens?\n", "completion": "weight of dish was lighter before and heavier afterwards, composition of ramen was topped with only chicken before and topped with chicken and bacon afterwards, coverage of chicken was uncovered before and covered afterwards, location of bacon was in the fridge before and on the dish afterwards, location of bacon was in frige before and in pan afterwards, composition of pot was filled with chicken and ramen before and filled with bacon, chicken and ramen afterwards, neatness of bacon was in mass before and ordered afterwards, length of bacon was curled before and straight afterwards, volume of pot was half full before and three-quarters full afterwards, location of bacon was on plate before and on chicken afterwards, organization of chicken was topmost before and second to the top afterwards, location of bacon was away from chicken before and on top on chicken afterwards\n###\n"}
{"prompt": "Prepare ramen noodles as directed on package, but discard the soup base. Cook the chicken pieces until thoroughly cooked or browned. Layer the bacon on top of the chicken. Dress and finish the salad with a generous helping of croutons and salad dressing. Now, what happens?\n", "completion": "location of salad dressing was in a bottle before and on the salad afterwards, state of salad was incomplete before and complete afterwards, state of salad was on table before and served afterwards, location of croutons was in a bag before and on the salad afterwards, location of crouton was in package before and on salad afterwards, weight of salad was lighter before and heavier afterwards, moisture of croutons was dry before and moist afterwards, location of dressing was in bottle before and on salad afterwards, taste of salad was naked before and dressed afterwards, state of salad was in progress before and finished afterwards, moisture of dish was dry before and wet afterwards, location of croutons was on cabinet before and in salad afterwards, location of dressing was in bottle before and on top of chicken salad afterwards, location of croutons was in kitchen before and in the chicken salad afterwards, volume of pot was three-quarters full before and completely full afterwards\n###\n"}
{"prompt": "Determine which season your tree should be trimmed during. Now, what happens?\n", "completion": "knowledge of seaon was undetermined before and determined afterwards\n###\n"}
{"prompt": "Determine which season your tree should be trimmed during. Ensure that the tree has enough time to recover from the pruning. Now, what happens?\n", "completion": "state of tree was whole before and cut afterwards\n###\n"}
{"prompt": "Determine which season your tree should be trimmed during. Ensure that the tree has enough time to recover from the pruning. Determine which branches should be pruned. Now, what happens?\n", "completion": "choice of branches was unchosen before and chosen afterwards\n###\n"}
{"prompt": "Determine which season your tree should be trimmed during. Ensure that the tree has enough time to recover from the pruning. Determine which branches should be pruned. Trim the bonsai tree&#x27;s roots accordingly. Now, what happens?\n", "completion": "composition of roots was whole before and cut afterwards, state of roots was long before and short afterwards, exposure of roots was potted before and exposed afterwards, state of tree roots was uncut before and trimmed afterwards, location of bonsai was in a pot before and in someone's hand afterwards, state of roots was untrimmed before and trimmed afterwards\n###\n"}
{"prompt": "Equip one girl in the Songstress dressphere and the other two in the Gunner dressphere. Now, what happens?\n", "completion": "state of girl was unequipped before and equipped afterwards, arming of girls in dresspheres was normally posed before and equipped afterwards, state of the songstress dressphere was unequipped before and equipped afterwards, availability of gunner dresspheres was unequipped before and equipped to girls afterwards, availability of songstress \ndressphere was unequipped before and equipped to girl afterwards\n###\n"}
{"prompt": "Equip one girl in the Songstress dressphere and the other two in the Gunner dressphere. Immediately have the Songstress use Magical Masque. Now, what happens?\n", "completion": "state of the songstress was doing something else before and using the magical masque afterwards, complexity of magical masque was in storage before and wearing the mascue afterwards\n###\n"}
{"prompt": "Equip one girl in the Songstress dressphere and the other two in the Gunner dressphere. Immediately have the Songstress use Magical Masque. Have the Gunners use the ability Tableturner on Black Elemental. Now, what happens?\n", "completion": "state of gunners was regular guys before and tableturners afterwards, state of the gunners was doing something else before and using the ability tableturner on black elemental afterwards\n###\n"}
{"prompt": "Equip one girl in the Songstress dressphere and the other two in the Gunner dressphere. Immediately have the Songstress use Magical Masque. Have the Gunners use the ability Tableturner on Black Elemental. Keep doing the following and you should beat Black Elemental. Now, what happens?\n", "completion": "knowledge of you was unable to beat black elemental before and able to beat black elemental afterwards\n###\n"}
{"prompt": "Free pour the white crème de cacao in the shot glass. Now, what happens?\n", "completion": "weight of the glass was lighter before and heavier afterwards, weight of the bottle was heavier before and lighter afterwards, state of glass was empty before and full afterwards, weight of glass was lighter before and heavier afterwards, state of ingredients was separate before and mixed afterwards, location of crème de cacao was in bottle before and in shot glass afterwards, state of the glass was dry before and wet afterwards, volume of glass was empty before and fuller afterwards\n###\n"}
{"prompt": "Free pour the white crème de cacao in the shot glass. Take your teaspoon and turn it around, so that the bottom is facing you. Now, what happens?\n", "completion": "weight of the glass was lighter before and heavier afterwards, position of the bottom of the teaspoon was facing away from you before and now facing towards you afterwards, location of the teaspoon was elsewhere before and in the glass afterwards, state of teaspoon was facing up before and facing down afterwards, location of teaspoon was in drawer before and in hand afterwards, state of the teaspoon was dry before and wet afterwards, orientation of teaspoon was facing forward before and facing backwards afterwards\n###\n"}
{"prompt": "Free pour the white crème de cacao in the shot glass. Take your teaspoon and turn it around, so that the bottom is facing you. Slowly pour the Baileys over the teaspoon. Now, what happens?\n", "completion": "weight of the glass was lighter before and heavier afterwards, weight of the bottle was heavier before and lighter afterwards, location of bailey's was in bottle before and in glass afterwards, state of teaspoon was dry before and wet afterwards, volume of bottle was fuller before and emptier afterwards, volume of the bottle was more full before and less full afterwards, state of the bottom of the teaspoon was dry before and wet afterwards\n###\n"}
{"prompt": "Free pour the white crème de cacao in the shot glass. Take your teaspoon and turn it around, so that the bottom is facing you. Slowly pour the Baileys over the teaspoon. Finished. Now, what happens?\n", "completion": "focus of you was making a drink before and finished afterwards\n###\n"}
{"prompt": "Use your garden fork and dig into the ground from the side of the carrot&#x27;s row. Now, what happens?\n", "completion": "cleanness of garden fork was cleaner before and dirtier afterwards, cleanness of garden fork was clean before and dirty afterwards, state of ground was solid before and dug afterwards, state of ground was unbroken before and dug up afterwards, cleanness of garden fork was clean before and dirtier afterwards, organization of dirt was undisturbed before and dug up afterwards\n###\n"}
{"prompt": "Use your garden fork and dig into the ground from the side of the carrot&#x27;s row. Get a good grip, but not a tight one, on the green tops while you pull them up. Now, what happens?\n", "completion": "location of carrot was underground before and above ground afterwards, location of carrot was in ground before and pulled up afterwards, state of hand was down before and up afterwards, location of carrots was in ground before and out of ground afterwards\n###\n"}
{"prompt": "Use your garden fork and dig into the ground from the side of the carrot&#x27;s row. Get a good grip, but not a tight one, on the green tops while you pull them up. Inspect each carrot for holes and blemishes (color changes). Now, what happens?\n", "completion": "There will be no change.\n###\n"}
{"prompt": "Use your garden fork and dig into the ground from the side of the carrot&#x27;s row. Get a good grip, but not a tight one, on the green tops while you pull them up. Inspect each carrot for holes and blemishes (color changes). Air dry them on the surface for about 20 minutes or so before putting them in storage. Now, what happens?\n", "completion": "wetness of carrots was wet before and dry afterwards, location of carrots was on surface before and in storage afterwards, wetness of carrots was moist before and drier afterwards, wetness of carrots was wetter before and drier afterwards, state of carrots was wet before and dry afterwards, location of carrots was out in the open before and in storage afterwards, location of sun was farther east before and farther west afterwards\n###\n"}
{"prompt": "This is of Course the easiest level out there. Now, what happens?\n", "completion": "There will be no change.\n###\n"}
{"prompt": "This is of Course the easiest level out there. Medium is more difficult than easy. Now, what happens?\n", "completion": "There will be no change.\n###\n"}
{"prompt": "This is of Course the easiest level out there. Medium is more difficult than easy. This level is a lot more crazy that Easy and Medium. Now, what happens?\n", "completion": "There will be no change.\n###\n"}
{"prompt": "This is of Course the easiest level out there. Medium is more difficult than easy. This level is a lot more crazy that Easy and Medium. Beat Expert. Now, what happens?\n", "completion": "completion of song was beginning before and finished afterwards, state of expert was unbeaten before and beaten afterwards, number of points was low before and high afterwards, completion of level was unfinished before and finished afterwards, state of you was doing something else before and beating expert afterwards\n###\n"}
{"prompt": "Put the water into a small saucepan. Now, what happens?\n", "completion": "weight of saucepan was lighter before and heavier afterwards, state of water faucet was off before and turned on afterwards, weight of water container was heavier before and lighter afterwards, volume of saucepan was empty before and fuller afterwards, weight of saucepan was light before and heavier afterwards, volume of saucepan was empty before and filled with water afterwards, location of saucepan was in cupboard before and on counter afterwards, location of water was in measuring cup before and in the pot afterwards, weight of pan was lighter before and heavier afterwards, moisture of measuring cup was dry before and wet afterwards, wetness of saucepan was dry before and wet afterwards, moisture of pot was dry before and wet afterwards, fullness of water container was fuller before and emptier afterwards\n###\n"}
{"prompt": "Put the water into a small saucepan. Pour in the salt and cook over gentle heat until the salt dissolves. Now, what happens?\n", "completion": "temperature of water was cooler before and hot afterwards, weight of saucepan was lighter before and heavier afterwards, composition of salt was crystallized before and dissolved afterwards, state of salt was separate before and dissolved afterwards, salinity of salinity was low before and high afterwards, texture of salt was granular before and dissolved afterwards, taste of water was plain before and salty afterwards, temperature of saucepan was cooler before and hot afterwards, temperature of water was cold before and boiling afterwards, location of salt was in cupboard before and out of cupboard afterwards, temperature of water was colder before and hotter afterwards, cleanness of spoon was clean before and dirty afterwards, taste of water was unsalty before and saltier afterwards, state of stove was off before and on afterwards\n###\n"}
{"prompt": "Put the water into a small saucepan. Pour in the salt and cook over gentle heat until the salt dissolves. Remove from heat and allow to cool. Now, what happens?\n", "completion": "state of stove was on before and off afterwards, temperature of mixture was hot before and cool afterwards, power of stove was on before and off afterwards, temperature of water was hot before and cooler afterwards, temperature of water was hotter before and cool afterwards, temperature of pot was hot before and cooling afterwards, temperature of water was hot before and cool afterwards, location of pan was on burner before and off burner afterwards, temperature of towel was cool before and hot afterwards, temperature of saucepan was hotter before and cool afterwards\n###\n"}
{"prompt": "Put the water into a small saucepan. Pour in the salt and cook over gentle heat until the salt dissolves. Remove from heat and allow to cool. Use a pastry brush to coat the savoury baked items with the cooled salt glaze. Now, what happens?\n", "completion": "moisture of pastry brush was dry before and wet afterwards, coating of baked items was bare before and coated afterwards, cleanness of brush was clean before and dirtier afterwards, state of items was dry before and wet afterwards, cleanness of pasty brush was clean before and dirty afterwards, area of salt glaze was on brush before and spread on pastry afterwards, composition of baked items was bare before and glazed afterwards, cleanness of pastry brush was clean before and dirty afterwards, temperature of salt glaze was hot before and cool afterwards, location of pastry brush was in drawer before and in hand afterwards, glazing of foods was unglazed before and glazed afterwards\n###\n"}
{"prompt": "Cut onion in half. Now, what happens?\n", "completion": "location of onion was in bag before and on cutting board afterwards, size of onion was whole before and cut afterwards, weight of the onion was whole before and lighter afterwards, cleanness of cutting board was clean before and dirty afterwards, shape of onion was whole before and cut in half afterwards, statespear of onion was whole before and cut afterwards, cleanness of knife was clean before and dirty afterwards, state of the knife was dry before and wet afterwards, moisture of knife was dry before and wet afterwards\n###\n"}
{"prompt": "Cut onion in half. Stab the onion half with your grill spear. Now, what happens?\n", "completion": "state of the onion half was separate before and attached to the grill spear afterwards, state of spear was empty before and full afterwards, weight of the grill spear was lighter before and heavier afterwards, moisture of spear was dry before and wet afterwards, cleanness of grill spear was clean before and dirty afterwards, cleanness of spear was clean before and dirty afterwards, location of spear was loose before and in onion afterwards, state of grill spear was empty before and stabbed to onion afterwards, location of grill spear was in package before and in hand afterwards\n###\n"}
{"prompt": "Cut onion in half. Stab the onion half with your grill spear. Apply onion to a hot grill. Now, what happens?\n", "completion": "cleanness of grill was dirty before and clean afterwards, emptiness of grill top was empty before and holding onion afterwards, temperature of onion was cold before and hot afterwards, temperature of the onions was cooler before and warmer afterwards, location of the onions was off the grill before and on the grill afterwards, state of the onions was wetter before and drier afterwards, weight of the grill was lighter before and heavier afterwards, state of onion was cold before and hot afterwards, temperature of grill spear was cold before and warm afterwards, temperature of grill was cold before and hot afterwards, moisture of grill was dry before and wet afterwards\n###\n"}
{"prompt": "Cut onion in half. Stab the onion half with your grill spear. Apply onion to a hot grill. Wipe grill with wet kitchen towel as you work. Now, what happens?\n", "completion": "cleanness of kitchen towel was clean before and dirty afterwards, wetness of kitchen towel was dry before and wet afterwards, cleanness of the grill was dirtier before and cleaner afterwards, temperature of kitchen towel was cold before and warm afterwards, wetness of grill top was dry before and wet afterwards, moisture of cloth was wet before and dry afterwards, temperature of cloth was cool before and hot afterwards, state of the towel was wetter before and drier afterwards, cleanness of cloth was clean before and dirty afterwards, weight of the towel was heavier before and lighter afterwards, state of towel was dry before and wet afterwards, moisture of grill was dry before and wet afterwards, temperature of the towel was cooler before and warmer afterwards\n###\n"}
{"prompt": "Select two pipe cleaners of the same color. Now, what happens?\n", "completion": "There will be no change.\n###\n"}
{"prompt": "Select two pipe cleaners of the same color. Twist the pipe cleaners together to make the body. Now, what happens?\n", "completion": "There will be no change.\n###\n"}
{"prompt": "Select two pipe cleaners of the same color. Twist the pipe cleaners together to make the body. Twist a pipe cleaner around the tip of your index finger two times in order to make the head. Now, what happens?\n", "completion": "There will be no change.\n###\n"}
{"prompt": "Select two pipe cleaners of the same color. Twist the pipe cleaners together to make the body. Twist a pipe cleaner around the tip of your index finger two times in order to make the head. Attach the neck to the body. Now, what happens?\n", "completion": "There will be no change.\n###\n"}
{"prompt": "Fill your glass halfway with ice cubes. Now, what happens?\n", "completion": "fullness of glass was empty before and half full afterwards, state of glass was empty before and full afterwards, statein of ice was frozen before and melting afterwards, location of ice cubes was in freezer before and in glass afterwards, volume of glass was empty before and half full with ice cubes afterwards, cleanness of glass was clean before and dirty afterwards, weight of glass was lighter before and heavier afterwards, moisture of glass was dry before and moist afterwards, texture of ice was in a freezing temperature before and starting to melt afterwards, temperature of glass was room temperature before and cold afterwards\n###\n"}
{"prompt": "Fill your glass halfway with ice cubes. Add the cola, cointreau, and red wine into the glass. Now, what happens?\n", "completion": "weight of glass was lighter before and heavy afterwards, volume of glass was half full before and full afterwards, location of cola was in a can before and in a glass afterwards, weight of glass was lighter before and heavier afterwards, state of ingredients was separate before and mixed afterwards, state of red wine was corked before and open afterwards, location of red wine was in a bottle before and in a glass afterwards, location of cointreau was in bottle before and in glass afterwards\n###\n"}
{"prompt": "Fill your glass halfway with ice cubes. Add the cola, cointreau, and red wine into the glass. Cut a small cut in the cherry and use it as a garnish on the side of the glass. Now, what happens?\n", "completion": "cleanness of cutting board was clean before and dirty afterwards, state of cherry was whole before and cut afterwards, decoration of glass was plain before and decorated afterwards, composition of cherry was whole before and cut open afterwards, cleanness of knife was clean before and dirty afterwards, color of glass was free of garnish before and garnished with a cherry afterwards, location of cherry was in fridge before and on glass afterwards, state of cherry was solid before and slightly cut afterwards\n###\n"}
{"prompt": "Fill your glass halfway with ice cubes. Add the cola, cointreau, and red wine into the glass. Cut a small cut in the cherry and use it as a garnish on the side of the glass. Finished.######//&lt;! Now, what happens?\n", "completion": "There will be no change.\n###\n"}
{"prompt": "Sprinkle the spill with salt immediately. Now, what happens?\n", "completion": "texture of liquid was smooth before and gritty afterwards, temperature of salt was cold before and hotter afterwards, container of salt jar was fuller before and less full afterwards, location of salt was in before and gone from the container afterwards, location of salt was in bottle before and on stove afterwards, state of stain was on stove before and absorbed afterwards, state of stove was clean before and salted afterwards, container of stove was empty before and covered in salt afterwards\n###\n"}
{"prompt": "Sprinkle the spill with salt immediately. Leave the mess as you continue cooking. Now, what happens?\n", "completion": "location of salt was in bottle before and on stove afterwards\n###\n"}
{"prompt": "Sprinkle the spill with salt immediately. Leave the mess as you continue cooking. Allow the stovetop or oven to cool. Now, what happens?\n", "completion": "location of heat was on the oven before and is gone afterwards, state of stove was hot before and cool afterwards, temperature of salt was hot before and cool afterwards, temperature of stovetop was hot before and cool afterwards, temperature of stove was hot before and cool afterwards, availability of oven was turned on before and turned off afterwards, temperature of stovetop was hotter before and cooler afterwards\n###\n"}
{"prompt": "Sprinkle the spill with salt immediately. Leave the mess as you continue cooking. Allow the stovetop or oven to cool. Wipe off the mess. Now, what happens?\n", "completion": "location of mess was on the oven before and gone afterwards, temperature of cloth was cool before and warm afterwards, cleanness of towel was clean before and dirty afterwards, cleanness of cloth was clean before and dirty afterwards, state of mess was dirty before and clean afterwards, moisture of cloth was dry before and wet afterwards, location of salt was on stove before and on cloth afterwards\n###\n"}
{"prompt": "Commence at the right side of the fabric design. Now, what happens?\n", "completion": "state of color of yarn to use was undecided before and decided afterwards, familiarity of familiarity with  italian lace stitch was absent before and present afterwards, state of cloth was bare before and sewn afterwards, composition of cloth was loose before and tatted afterwards, location of knitting needle was absent before and present afterwards, knowledge of knowledge of lace-working was absent before and present afterwards\n###\n"}
{"prompt": "Commence at the right side of the fabric design. Stitch the first row. Now, what happens?\n", "completion": "state of row was chosen before and made afterwards, location of thread was in needle before and in cloth afterwards, location of position of needle was right before and left afterwards, state of row was empty before and stitched afterwards, magnitude of number pf rows stitched was zero before and one afterwards, magnitude of number of draping lops made was zero before and two afterwards, magnitude of number of small loops made was zero before and six afterwards\n###\n"}
{"prompt": "Commence at the right side of the fabric design. Stitch the first row. Stitch the second row. Now, what happens?\n", "completion": "composition of second row was empty before and started afterwards, magnitude of number of small loops made in row 2 was zero before and six afterwards, location of position of needle was right of row 2 before and left of row 2 afterwards, magnitude of number pf rows stitched was one before and two afterwards, magnitude of number of draping lops made in row 2 was zero before and two afterwards, state of row was finished before and started afterwards\n###\n"}
{"prompt": "Commence at the right side of the fabric design. Stitch the first row. Stitch the second row. Continue stitching until you have formed the shape directed in your pattern. Now, what happens?\n", "completion": "knowledge of italian loop was unmastered before and mastered afterwards, state of shape was selected before and finished afterwards, location of yarn was on spindle before and in knitted object afterwards, state of stitching was in progress before and completed afterwards, form of pattern was invisible before and shaped afterwards, visibility of shape being stitched was invisible before and visible afterwards\n###\n"}
{"prompt": "Cut off the fabric you have selected. Now, what happens?\n", "completion": "form of fabric was whole before and in (heart-shaped) pieces afterwards, shape of fabric was uncut before and cut into heart shapes afterwards, length of fabric was longer before and shorter afterwards, composition of fabric was whole before and cut afterwards, weight of the larger piece of fabric was heavier before and lighter afterwards, state of the fabric was part of a larger piece before and now separate afterwards, length of the larger piece of fabric was longer before and now shorter afterwards, state of threads was secure before and fraying afterwards, dullness of scissors was sharper before and more dull afterwards\n###\n"}
{"prompt": "Cut off the fabric you have selected. Sew two pieces of heart fabric. Now, what happens?\n", "completion": "state of fabric was whole before and punctured afterwards, weight of the pieces was lighter before and heavier afterwards, form of fabric pieces was separate before and attached afterwards, thickness of fabric was single layered before and doubled layered afterwards, state of the pieces was seperate before and combined afterwards, threading of needle was threadless before and threaded afterwards, composition of heart shaped fabric was unstitched before and sewn together afterwards, location of thread was on a spool before and in a piece of fabric afterwards, location of fabric pieces was separate before and together afterwards\n###\n"}
{"prompt": "Cut off the fabric you have selected. Sew two pieces of heart fabric. Turn over the heart to the observe side; stuff the quilting inside through the small opening. Now, what happens?\n", "completion": "form of heart shaped fabric was flat before and puffy afterwards, fullness of pillow was empty before and full afterwards, position of fabric was inside out before and right side out afterwards, shape of heart was flatter before and rounder afterwards, weight of the heart was lighter before and heavier afterwards, thickness of the heart was thinner before and thicker afterwards, composition of heart shaped pillow form was empty inside before and filled with quilting afterwards, location of stuffing was outside of the pillow before and inside the pillow afterwards, weight of pillow was lighter before and heavier afterwards, location of quilting was on the table before and inside the pillow afterwards, position of the heart was on the other side before and now on the observe side afterwards\n###\n"}
{"prompt": "Cut off the fabric you have selected. Sew two pieces of heart fabric. Turn over the heart to the observe side; stuff the quilting inside through the small opening. Make a bow with satin ribbon; sew the bow to the middle top of the heart. Now, what happens?\n", "completion": "form of satin ribbon was straight before and tied into a bow shape afterwards, location of satin bow was separate from the pillow before and attached to the pillow afterwards, shape of the ribbon was straight before and a bow afterwards, composition of pillow was unadorned before and decorated with a satin bow afterwards, securing of ribbon was loose before and secured afterwards, weight of the heart was lighter before and heaver afterwards, shape of ribbon was straight before and in a bow afterwards, location of the bow was separate before and on the heart afterwards, shape of ribbon was flat before and tied in a bow afterwards, decoration of heart was plain before and decorated afterwards, state of the bow was separate before and now attached afterwards\n###\n"}
{"prompt": "Complete the Challenge of the Gods. Now, what happens?\n", "completion": "state of the  challenge of the gods was uncompleted before and complete afterwards, knowledge of knowledg of what the challenges of the gods are was absent before and are present afterwards, familiarity of god of war was unfamiliar before and familiar afterwards, state of challenge was uncompleted before and completed afterwards, state of the challenge was uncompleted before and completed afterwards, state of challenges 1 through 10 was unknown before and in progress afterwards, knowledge of knowledge of what god mode is was absent before and is present afterwards\n###\n"}
{"prompt": "Complete the Challenge of the Gods. Take each part one step at a time. Now, what happens?\n", "completion": "state of undead in challenge 2 was alive before and dead afterwards, state of minotaurs in challenge 4 was alive before and dead afterwards, location of magic legionnaires  in challenge 1 was on platform before and off platform afterwards, state of pots in challenge 3 was whole before and destroyed afterwards, steps of you was taking parts differently before and taking parts one at a time afterwards\n###\n"}
{"prompt": "Complete the Challenge of the Gods. Take each part one step at a time. After beating the Challenge of the Gods you should be pretty good at evading and attacking; therefore enemies shouldn&#x27;t be a big problem############ Now, what happens?\n", "completion": "magnitude of damage enemies can do to you was high before and one-fifth as high afterwards, magnitude of attacking skills was minimal before and well-developed afterwards, skill of you was less skilled before and more skilled afterwards, skill of you was less skilled before and now skilled afterwards, magnitude of enemies was big problem before and small problem afterwards, magnitude of evasion skills was minimal before and well-developed afterwards\n###\n"}
{"prompt": "Complete the Challenge of the Gods. Take each part one step at a time. After beating the Challenge of the Gods you should be pretty good at evading and attacking; therefore enemies shouldn&#x27;t be a big problem############ Beating bosses will take a lot longer. Now, what happens?\n", "completion": "state of dauði kaupmaðr (boss) was undefeated before and defeated afterwards, knowledge of knowledge pf bosses names was absent before and present afterwards, state of brenna dauði (boss) was undefeated before and defeated afterwards, speed of you was proceeding faster before and proceeding slower afterwards, speed of you was beating opponents faster before and now beating opponents slower afterwards\n###\n"}
{"prompt": "Mix the blueberries and sugar in a suitable jar. Now, what happens?\n", "completion": "location of blueberries and sugar was in separate packages before and mixed in a jar afterwards, shape of they was an ingredient before and a mixture afterwards, taste of blueberries was tart before and sweeter afterwards, form of they was seperated before and mixed together afterwards, state of ingredients was separate before and mixed afterwards, composition of sugar and blueberries was separate before and mixed afterwards, focus of it was a recipe before and a food afterwards, location of blueberries was in bowl before and in jar afterwards, purpose of it was 2 solids before and mixed ingredients afterwards\n###\n"}
{"prompt": "Mix the blueberries and sugar in a suitable jar. Pour in gin to cover the blueberries. Now, what happens?\n", "completion": "texture of they was solid before and mushy afterwards, purpose of they was edible before and drinkable afterwards, location of gin was in liquour cabinet before and in new jar afterwards, wetness of blueberries and sugar was dry before and wetter afterwards, moisture of they was dry before and wet afterwards, color of blueberries was light blue before and deep blue afterwards, intoxicant of they was non-alcoholic before and alcoholic afterwards, state of blueberries was dry before and wet afterwards, composition of blueberries and gin was separtate before and mixed afterwards, taste of blueberries was sweet before and tangy afterwards\n###\n"}
{"prompt": "Mix the blueberries and sugar in a suitable jar. Pour in gin to cover the blueberries. Place the lid on the jar and put aside to age. Now, what happens?\n", "completion": "state of jar was open before and closed afterwards, form of it was a mixture before and a drink afterwards, location of lid was separate before and on jar afterwards, containment of they was exposed to air before and sealed afterwards, clarity of they was uncovered before and covered afterwards, state of jar was open before and sealed afterwards, age of they was fresh before and getting old afterwards, tightness of jar lid was loose before and tightened afterwards\n###\n"}
{"prompt": "Mix the blueberries and sugar in a suitable jar. Pour in gin to cover the blueberries. Place the lid on the jar and put aside to age. Serve. Now, what happens?\n", "completion": "movement of they was being still before and moving afterwards, form of it was in a jar before and in a bowl afterwards, location of ingredients was in jar before and in bowl afterwards, location of blueberries was in jar before and on plate afterwards, airability of they was contained before and exposed afterwards, focus of they was being prepared before and ready-to-eat afterwards\n###\n"}
{"prompt": "This requires thinking ahead when you first place your pot plant down. Now, what happens?\n", "completion": "preparation of location was random before and planned afterwards, knowledge of you was unaware that you needed to think ahead before and aware that you need to think ahead afterwards\n###\n"}
{"prompt": "This requires thinking ahead when you first place your pot plant down. Purchase or hire a trolley with adequate width at the base able to take the pot size. Now, what happens?\n", "completion": "cost of you was richer before and poorer afterwards, location of pot was on the ground before and on a trolley afterwards, position of trolley was upright before and tilted afterwards, ownership of trolley was in store before and bought by you afterwards, possession of you was in need of a trolley before and now in possession of a trolley afterwards, motion of trolley was still before and moving afterwards, location of trolley was at store before and in your home afterwards\n###\n"}
{"prompt": "This requires thinking ahead when you first place your pot plant down. Purchase or hire a trolley with adequate width at the base able to take the pot size. Use a cardboard box. Now, what happens?\n", "completion": "location of pots was on the ground before and on cardboard afterwards, movement of cardboard was still before and moving afterwards, location of box was in garage before and in plants area afterwards, position of back was straight before and bend afterwards, location of pots was stationary before and moved afterwards, shape of box was whole before and flattened afterwards\n###\n"}
{"prompt": "This requires thinking ahead when you first place your pot plant down. Purchase or hire a trolley with adequate width at the base able to take the pot size. Use a cardboard box. Finished. Now, what happens?\n", "completion": "state of you was moving a pot before and now finished afterwards\n###\n"}
{"prompt": "Gather your things needed############ Now, what happens?\n", "completion": "location of things needed was in their place before and gathered afterwards, location of things was scattered before and gathered afterwards, location of the things was elsewhere before and gathered afterwards\n###\n"}
{"prompt": "Gather your things needed############ Wipe the disc from the center to the outer edge with then cloth, making as many swipes as needed. Now, what happens?\n", "completion": "location of disc was in box before and in hand afterwards, state of disk was dirty before and clean afterwards, cleanness of cloth was cleaner before and dirtier afterwards, shininess of disc was duller before and shiny afterwards, cleanness of the cloth was cleaner before and dirtier afterwards, brightness of the disc was duller before and brighter afterwards, cleanness of the disc was dirty before and cleaner afterwards, cleanness of cloth was clean before and dusty afterwards, cleanness of disc was dirtier before and cleaner afterwards, cleanness of disc was dusty before and dust free afterwards\n###\n"}
{"prompt": "Gather your things needed############ Wipe the disc from the center to the outer edge with then cloth, making as many swipes as needed. If there is something you cannot get, spray some disc cleaning spray on it then wipe it off. Now, what happens?\n", "completion": "state of the disc was dry before and wet afterwards, cleanness of disc was dirtier before and cleaner afterwards, weight of the bottle was heavier before and lighter afterwards, cleanness of disc was dirty before and clean afterwards, location of cleaning spray was in bottle before and on disc afterwards, volume of the bottle was filled with more liquid before and filled with less liquid afterwards, state of disc was dry before and wet afterwards, moisture content of cloth was dry before and damp afterwards, weight of spray bottle was heavier before and lighter afterwards, wetness of wiping cloth was dry before and wet afterwards, weight of the disc was lgihter before and heavier afterwards\n###\n"}
{"prompt": "Gather your things needed############ Wipe the disc from the center to the outer edge with then cloth, making as many swipes as needed. If there is something you cannot get, spray some disc cleaning spray on it then wipe it off. Never use a shirt to clean a disc, you could scratch it. Now, what happens?\n", "completion": "damage of disc was smooth before and scratched afterwards, knowledge of you was unaware before and aware afterwards\n###\n"}
{"prompt": "Place the butter, onion and garlic into a saucepan. Now, what happens?\n", "completion": "fullness of saucepan was empty before and full afterwards, location of butter and onion and garlic was in cooler before and on stove afterwards, composition of butter and onion and garlic was separate before and mixed afterwards, temperature of butter was cool before and hot afterwards, temperature of butter and onion and garlic was cool before and hot afterwards, weight of saucepan was lighter before and heavier afterwards, cleanness of saucepan was clean before and dirty afterwards, location of garlic was on the cutting board before and in the saucepan afterwards, location of onion was on the cutting board before and in the saucepan afterwards, composition of ingredients was separated before and combined afterwards, state of butter was solid before and melted afterwards, location of butter, onion and garlic was in their places before and in saucepan afterwards\n###\n"}
{"prompt": "Place the butter, onion and garlic into a saucepan. Remove the saucepan from the heat. Now, what happens?\n", "completion": "location of saucepan was on the burner before and off the burner afterwards, location of pan was on stove before and off stove afterwards, temperature of pan was hot before and cool afterwards, location of saucepan was on stove top before and removed from stove top afterwards, temperature of saucepan was warm before and cooler afterwards, temperature of saucepan was hotter before and cooler afterwards\n###\n"}
{"prompt": "Place the butter, onion and garlic into a saucepan. Remove the saucepan from the heat. Add the remaining ingredients. Now, what happens?\n", "completion": "weight of saucepan was lighter before and heavier afterwards, location of remaining ingredients was on counter before and in saucepan afterwards, state of remaining ingredients was separate before and added  in afterwards, temperature of remaining ingredients was cold before and warm afterwards, composition of ingredients was separate before and mixed afterwards, location of ingredients was on counter before and in pan afterwards, location of remaining ingredients was out of the saucepan before and in the saucepan afterwards\n###\n"}
{"prompt": "Place the butter, onion and garlic into a saucepan. Remove the saucepan from the heat. Add the remaining ingredients. Once the mixture has been mixed thoroughly and becomes firmer, it&#x27;s ready to use as stuffing. Now, what happens?\n", "completion": "state of mixture was unmixed before and mixed thoroughly afterwards, consistency of mixture was thinner before and thicker afterwards, texture of mixture was loose, watery before and firm afterwards, composition of ingredients was separate before and together afterwards, firmness of mixture was looser before and firmer afterwards, hardness of mixture was soft before and firm afterwards\n###\n"}
{"prompt": "Mix all of the ingredients together into a paste. Now, what happens?\n", "completion": "mass of bottle of vinegar was massive before and less massive afterwards, location of borax was in bag before and in mixing bowl afterwards, composition of ingredients was separate before and combined afterwards, weight of mixing bowl was lighter before and heavier afterwards, location of water was in cup before and in mixing bowl afterwards, location of vinegar was in bottle before and in mixing bowl afterwards, texture of ingredients was rough before and pasty afterwards, fullness of bowl was empty before and full afterwards, weight of ingredients bowl was heavier before and lighter afterwards, cleanness of spoon was clean before and dirty afterwards, composition of ingredients was separated before and combined afterwards, cleanness of measuring c up was clean before and dirty afterwards, location of ingredients was apart before and together afterwards\n###\n"}
{"prompt": "Mix all of the ingredients together into a paste. Rub the paste direct into the carpet over the stain. Now, what happens?\n", "completion": "location of cleaning mixture was in mixing bowl before and on carpet afterwards, wetness of paste applicator was dry before and wet afterwards, cleanness of spoon was clean before and dirty afterwards, thickness of carpet was thinner before and thicker with paste afterwards, covering of stain was exposed before and covered afterwards, fullness of mixing bowl was full before and less full afterwards, location of paste was inside the bowl before and on the carpet afterwards, location of paste was in bowl before and on carpet afterwards, wetness of carpet was dry before and damp afterwards, cleanness of hands was clean before and dirty afterwards, wetness of carpet was dry before and wet afterwards, hardness of carpet was hard before and soft afterwards\n###\n"}
{"prompt": "Mix all of the ingredients together into a paste. Rub the paste direct into the carpet over the stain. Leave to sit for a few hours. Now, what happens?\n", "completion": "state of stain removal was beginning before and commencing afterwards, texture of carpet spot was bumpy before and smooth afterwards, wetness of carpet was wet before and dry afterwards, location of watch was absent before and in hand afterwards, wetness of paste was wet before and dry afterwards, freshness of paste was fresh before and old afterwards, moisture of paste was wet before and drier afterwards, weight of carpet was heavier before and lighter afterwards, wetness of cleaning mixture was wet before and dry afterwards\n###\n"}
{"prompt": "Mix all of the ingredients together into a paste. Rub the paste direct into the carpet over the stain. Leave to sit for a few hours. Vacuum up thoroughly. Now, what happens?\n", "completion": "dryness of paste was wet before and dry afterwards, state of stain was set in before and removed afterwards, speed of cleaning mixture was motionless before and moving afterwards, weight of vacuum bag was lighter before and heavier afterwards, location of cleaning mixture was on carpet before and in vacuum cleaner afterwards, location of paste was on the carpet before and in the vacuum afterwards, power of vacuum was off before and on afterwards, cleanness of carpet was dirty before and clean afterwards, location of vacuum was in closet before and on carpet afterwards, weight of carpet was heavier before and lighter afterwards, cleaness of carpet was dirty before and cleaner afterwards, location of dirt was on carpet before and in vacuum bag afterwards, location of vacuum cleaner was absent before and on carpet afterwards\n###\n"}
{"prompt": "Lay the ribbon out on a flat surface. Now, what happens?\n", "completion": "ribbon of ribbon was on spool before and placed on flat surface afterwards, location of the ribbon was elsewhere before and on a flat surface afterwards, state of ribbon was rolled before and flat afterwards\n###\n"}
{"prompt": "Lay the ribbon out on a flat surface. Mix together a third of rubbing alcohol with two thirds water. Now, what happens?\n", "completion": "state of water and alcohol was separate before and mixed afterwards, moisture of bowl was dry before and wet afterwards, weight of bowl was lighter before and heavier afterwards, state of ingredients was separate before and mixed afterwards, fullness of bowl was empty before and full afterwards, water of water was in sink before and in bowl afterwards, mix of alcohol and water was separated before and mixed in bowl afterwards, dilution of alcohol was strong before and diluted afterwards, alcohol of rubbing alcohol was in bottle before and in bowl afterwards\n###\n"}
{"prompt": "Lay the ribbon out on a flat surface. Mix together a third of rubbing alcohol with two thirds water. Use a clean sponge to gently sponge the ribbon with the mixture. Now, what happens?\n", "completion": "state of ribbon was dry before and wet afterwards, sponge of sponge was on counter before and dipped into mix afterwards, moisture of ribbon was dry before and wet afterwards, state of the sponge was dry before and wet afterwards, moisture of sponge was dry before and wet afterwards, mix on sponge of mix on sponge was in hand before and pressed on ribbon afterwards, location of mixture was in the bowl before and on the sponge afterwards, location of the mixture was on the sponge only before and on the ribbon afterwards\n###\n"}
{"prompt": "Lay the ribbon out on a flat surface. Mix together a third of rubbing alcohol with two thirds water. Use a clean sponge to gently sponge the ribbon with the mixture. Allow it to dry partly. Now, what happens?\n", "completion": "wetness of the ribbon was mostly wet before and partly dry afterwards, wetness of ribbon was wet before and somewhat dry afterwards, temperature of ribbon was cool before and warm afterwards, ribbon of ribbon was wet before and partially dry afterwards, temperature of iron was cool before and warm afterwards, state of ribbom was wet before and dry afterwards\n###\n"}
{"prompt": "Assemble the items needed and the ingredients. Now, what happens?\n", "completion": "ownership of vanilla ice cream was owned by the store before and owned by the person afterwards, location of ingredients was in pantry before and on table afterwards, location of vodka was in the cabinet before and on the table afterwards, location of vanilla ice cream was in the freezer before and on the table afterwards, ownership of vodka was owned by the store before and owned by the person afterwards, composition of ingredients was separated before and together afterwards, location of ice cram was in freezer before and on counter afterwards\n###\n"}
{"prompt": "Assemble the items needed and the ingredients. Place both the ice cream and the vodka into the food processor or blender. Now, what happens?\n", "completion": "location of ice cream and vodka was on table before and in processor afterwards, location of blender was on the shelf before and on the table afterwards, texture of ice cream was hard before and softer afterwards, composition of vodka and ice cream was separate before and mixed afterwards, cleanness of blender was clean before and dirty afterwards, weight of blender was lighter before and heavier afterwards, temperature of ice cream was cold before and melting afterwards, location of ice cream was in the container before and in the blender afterwards, temperature of vodka was warm before and cold afterwards\n###\n"}
{"prompt": "Assemble the items needed and the ingredients. Place both the ice cream and the vodka into the food processor or blender. Pour the blended mixture into the container. Now, what happens?\n", "completion": "weight of blender was heavier before and lighter afterwards, state of desiccated coconut was solid before and liquid afterwards, cleanness of blender was clean before and dirty afterwards, state of ice cream was solid before and liquid afterwards, cleanness of blender was clean before and dirtier afterwards, state of blender was on before and off afterwards, location of mixture was in blender before and in container afterwards\n###\n"}
{"prompt": "Assemble the items needed and the ingredients. Place both the ice cream and the vodka into the food processor or blender. Pour the blended mixture into the container. Serve. Now, what happens?\n", "completion": "temperature of spoon was warm before and cold afterwards, location of mixture was in container before and in serving dish afterwards, location of bowl was in the cupboard before and on the table afterwards, cleanness of spoon was clean before and dirty afterwards, cleanness of bowl was clean before and dirty afterwards, possession of mixture was on table before and in guest's hand afterwards\n###\n"}
{"prompt": "Make a solution of sugar dissolved in water. Now, what happens?\n", "completion": "fullness of container was empty before and full afterwards, composition of water was pure before and full of sugar afterwards, state of sugar was granulated before and dissolved afterwards, location of sugar was outside of water before and in water afterwards, state of sugar was solid before and dissolved afterwards, state of sugar was dry before and wet afterwards, state of sugar was grainy before and dissolved afterwards\n###\n"}
{"prompt": "Make a solution of sugar dissolved in water. Immerse the tablecloth or other fabric into the solution for a few minutes. Now, what happens?\n", "completion": "wetness of fabric was dry before and wet afterwards, wetness of tablecloth was dry before and wet afterwards, wetness of fabric was dry before and now wet with solution afterwards, location of the tablecloth was out of the solution before and in the solution afterwards, state of the tablecloth was dry before and wet afterwards, weight of the tablecloth was lighter before and heavier afterwards, location of tablecloth was outside of the container before and inside the container afterwards\n###\n"}
{"prompt": "Make a solution of sugar dissolved in water. Immerse the tablecloth or other fabric into the solution for a few minutes. Rinse the tablecloth in water. Now, what happens?\n", "completion": "cleanness of fabric was dirty before and clean afterwards, state of the table cloth was full of solution before and rinsed afterwards, state of fabric was sticky from solution before and now rinsed of solution afterwards, location of tablecloth was in sugar water before and in clean water afterwards\n###\n"}
{"prompt": "Make a solution of sugar dissolved in water. Immerse the tablecloth or other fabric into the solution for a few minutes. Rinse the tablecloth in water. Dry as usual. Now, what happens?\n", "completion": "fullness of drying rack was empty before and loaded afterwards, wetness of tablecloth was wet before and dry afterwards, wetness of the tablecloth was wet before and dry afterwards, location of water was in the tablecloth fabric before and in the air afterwards, location of fabric was in bucket before and on rack afterwards, temperature of tablecloth was cool before and warm afterwards, moisture of fabric was wet before and now dry afterwards\n###\n"}
{"prompt": "Prepare to make the chickpeas. Now, what happens?\n", "completion": "cleanness of pan was clean before and dirty afterwards, location of chickpeas was in can before and in pan afterwards, moisture of chickpeas was dry before and wet afterwards, taste of chickpeas was inedible before and edible afterwards, state of can was sealed before and open afterwards, location of chickpeas was in package before and in pan afterwards, emptiness of pan was empty before and holding peas afterwards, cleanness of can opener was clean before and dirty afterwards, moisture of chickpeas was wet before and dry afterwards, texture of chickpeas was hard before and soft afterwards, state of you was unprepared before and prepared afterwards, state of chickpeas was raw before and cooked afterwards\n###\n"}
{"prompt": "Prepare to make the chickpeas. Whisk together the Buffalo sauce ingredients. Now, what happens?\n", "completion": "location of bleu cheese was in fridge before and in bowl afterwards, state of ingredients was separated before and mixed afterwards, location of ingredients was in package before and in the bowl afterwards, location of hot sauce was in bottle before and in bowl afterwards, organization of ingredients was separate before and combined afterwards, location of hot sauce was in fridge before and in bowl afterwards, location of buttermilk was in carton before and in bowl afterwards, volume of bowl was empty before and full afterwards, emptiness of bowl was empty before and full afterwards, cleanness of bowl was clean before and dirty afterwards, location of buttermilk was in fridge before and in bowl afterwards, state of the ingredients was unmixed before and now mixed afterwards\n###\n"}
{"prompt": "Prepare to make the chickpeas. Whisk together the Buffalo sauce ingredients. Pour sauce over chickpeas. Now, what happens?\n", "completion": "location of sauce was in bowl before and in pan afterwards, moisture of chickpeas was dry before and wet afterwards, taste of chickpeas was unseasoned before and seasoned afterwards, location of the sauce was separate before and on the chickpeas afterwards, wetness of chicpeas was dry before and wet afterwards, state of chickpeas was uncovered before and covered afterwards, color of chicpeas was beige before and reddish afterwards, weight of the chickpeas was lighter before and heavier afterwards, weight of bowl was heavy before and light afterwards, location of sauce was in bowl before and on chickpeas afterwards, volume of bowl was full before and empty afterwards, emptiness of bowl was full before and empty afterwards, wetness of pan was dry before and wet afterwards, volume of pan was empty before and full afterwards\n###\n"}
{"prompt": "Prepare to make the chickpeas. Whisk together the Buffalo sauce ingredients. Pour sauce over chickpeas. Bake for 30 to 40 minutes in the preheated oven. Now, what happens?\n", "completion": "temperature of chicpeas was cold before and hot afterwards, electric conductivity of oven was turned off before and turned on afterwards, power of oven was off before and on afterwards, temperature of the oven was cold before and preheated afterwards, temperature of chickpeas was cold before and hot afterwards, state of the chickpeas was unbaked before and baked afterwards, temperature of pan was cold before and hot afterwards, state of chickpeas was uncooked before and cooked afterwards, state of chickpeas was raw before and cooked afterwards, temperature of oven was cold before and hot afterwards, temperature of cheese was cold before and hot afterwards\n###\n"}
{"prompt": "Separate screw and knob. Now, what happens?\n", "completion": "orientation of screw was attached to knob before and separated from knob afterwards, composition of knob assemly was together before and separated afterwards, placement of screw was attached to know before and separate from knob afterwards, weight of knob was heavier before and lighter afterwards, screw and knob of screw and knob was together before and separated afterwards\n###\n"}
{"prompt": "Separate screw and knob. Place a sliver of wood inside of the knob. Now, what happens?\n", "completion": "placement of sliver of wood was outside of knob before and inside knob afterwards, size of wood was larger before and slivered smaller afterwards, weight of knob was lighter before and heavier afterwards, size of wood was larger before and slivered afterwards, inside of knob of inside of knob was empty before and filled with sliver of wood afterwards\n###\n"}
{"prompt": "Separate screw and knob. Place a sliver of wood inside of the knob. Thread the knob back onto cabinet, closet or drawer. Now, what happens?\n", "completion": "location of knob was removed from door before and attached to door afterwards, location of knob was on counter before and on drawer afterwards, placement of knob was separate before and attached afterwards, knob of knob was out of drawer before and threaded into drawer afterwards\n###\n"}
{"prompt": "Separate screw and knob. Place a sliver of wood inside of the knob. Thread the knob back onto cabinet, closet or drawer. Test the handle. Now, what happens?\n", "completion": "handle of handle was untested before and tested afterwards, movement of handle was inert before and moving afterwards, knowledge of the handle was untested before and tested afterwards, tightness of handle was loose before and tight afterwards\n###\n"}
{"prompt": "With A Horse Army:Take Head on. Now, what happens?\n", "completion": "location of horse was in the stables before and on the battlefield afterwards, location of person was on the ground before and on the horse afterwards, power of fighters was calm before and angry afterwards, location of army was off the field before and on the field afterwards, form of fighters was getting ready before and fighting afterwards\n###\n"}
{"prompt": "With A Horse Army:Take Head on. With Infantry:If playing open field, send your hoplites or spear men(if you have any, triarii are roman spearmen)in front and your light infantry at their rear.If you have 3 groups of horse men(excluding your general)hide them until you start to have heavy casualties.Hit them from rear or side. Now, what happens?\n", "completion": "location of soldiers was standing around before and in position afterwards, action of fight was beginning before and in action afterwards, location of spear men was on the back line before and on the front line afterwards, location of light infantry was in the middle before and in the  back afterwards, amount of horse groups was one before and three afterwards, placement of your troops was in different locations before and now in a specific location afterwards\n###\n"}
{"prompt": "With A Horse Army:Take Head on. With Infantry:If playing open field, send your hoplites or spear men(if you have any, triarii are roman spearmen)in front and your light infantry at their rear.If you have 3 groups of horse men(excluding your general)hide them until you start to have heavy casualties.Hit them from rear or side. With A Horse Army:If there are no spear men, take head on. Now, what happens?\n", "completion": "action of horse army was off the field before and leading the charge afterwards, location of person was on the ground before and on the horse afterwards, knowledge of you was unaware of how to fight in a certain situation before and aware of how to handle a certain situation afterwards, location of horse was ni the stables before and on the battlefield afterwards\n###\n"}
{"prompt": "With A Horse Army:Take Head on. With Infantry:If playing open field, send your hoplites or spear men(if you have any, triarii are roman spearmen)in front and your light infantry at their rear.If you have 3 groups of horse men(excluding your general)hide them until you start to have heavy casualties.Hit them from rear or side. With A Horse Army:If there are no spear men, take head on. With Infantry: If you have a lot of ranged units, wait for them to attack and send your missile units at head.When they come move your ranged to a safe attacking distance. Now, what happens?\n", "completion": "knowledge of you was unaware of a tactic before and now aware of a tactic afterwards, action of ranged units was waiting to attack before and attacking afterwards, action of missile units was waiting to attack before and attacking afterwards, knowledge of player was inexperienced before and experienced afterwards\n###\n"}
{"prompt": "Soak bulgur wheat in boiling water until water is absorbed (about half an hour). Now, what happens?\n", "completion": "location of water was in faucet before and in bowl afterwards, wetness of wheat was dry before and wet afterwards, temperature of water was normal before and boiling afterwards, weight of bowl was light before and heavy afterwards, moisture of wheat was dry before and wet afterwards, volume of bowl was empty before and full afterwards, cleanness of container was clean before and dirty afterwards, fullness of container was empty before and fuller afterwards, placement of water was full before and lessened afterwards, temperature of wheat was cooler before and hotter afterwards\n###\n"}
{"prompt": "Soak bulgur wheat in boiling water until water is absorbed (about half an hour). Whisk olive oil and lemon juice together and pour over wheat. Now, what happens?\n", "completion": "state of olive oil and lemon juice was separate before and mixed together afterwards, mixing of ingredients was separate before and together afterwards, location of olive oil was separate before and in mixing bowl afterwards, state of wheat was plain before and seasoned afterwards, state of mixture was unwhisked before and whisked afterwards, cleanness of whisk was clean before and dirty afterwards, weight of wheat mixture was lighter before and heavier afterwards, location of lemon juice was separate before and part of  a mixture afterwards, ingrediants of wheat was incomplete before and prepped afterwards, location of lemon juice was in bottle before and in bowl afterwards, cleanness of mixing container was clean before and dirty afterwards, location of oil was in bottle before and in bowl afterwards, moisture of whisk was dry before and wet afterwards\n###\n"}
{"prompt": "Soak bulgur wheat in boiling water until water is absorbed (about half an hour). Whisk olive oil and lemon juice together and pour over wheat. Stir in diced beets and walnuts just before serving. Now, what happens?\n", "completion": "state of diced beets and walnuts was separate before and mixed in afterwards, size of beets was whole before and chopped afterwards, taste of dish was bland before and flavorful afterwards, location of walnuts was separate before and in mixture afterwards, location of walnuts was in shell before and in bowl afterwards, location of beets was on cutting board before and in bowl afterwards, location of diced beets was in can/jar before and in mixture afterwards, size of walnuts was whole before and chopped afterwards, weight of mixture was lighter before and heavier afterwards\n###\n"}
{"prompt": "Soak bulgur wheat in boiling water until water is absorbed (about half an hour). Whisk olive oil and lemon juice together and pour over wheat. Stir in diced beets and walnuts just before serving. Add salt and pepper to taste. Now, what happens?\n", "completion": "taste of mixture was unseasoned before and seasoned afterwards, taste of dish was bland before and flavorful afterwards, flavor of mixture was less flavorful before and more flavorful afterwards, completeness of dish was incomplete before and ready to serve afterwards, location of salt and pepper was separate before and in mixture afterwards, location of salt and pepper was in their containers before and mixed in afterwards\n###\n"}
{"prompt": "Paint the steps with clear paving paint. Now, what happens?\n", "completion": "shape of paint was round before and spread out afterwards, weight of paint can was heavier before and lighter afterwards, form of steps was plain/new before and sealed afterwards, composition of steps was bare before and painted afterwards, moisture of brush was dry before and wet afterwards, cleanness of paint brush was clean before and dirty afterwards, moisture of steps was dry before and wet afterwards, area of paint was in painting dish before and spread on steps afterwards, location of paint was in can before and on steps afterwards, cleanness of paintbrush was clean before and dirty afterwards, dampness of steps was dry before and wet afterwards, location of paint was can before and painting dish afterwards, state of steps was bare before and painted afterwards\n###\n"}
{"prompt": "Paint the steps with clear paving paint. Sprinkle fine sand over the wet paint. Now, what happens?\n", "completion": "moisture of salt was wet before and dry afterwards, covering of paint was exposed before and covered afterwards, texture of paint was smooth before and gritty afterwards, wetness of sand was dry before and wetter afterwards, cleanness of hand was clean before and dirty afterwards, location of sand was in bag before and on paint afterwards, texture of wet paint was smooth before and covered in sand afterwards, location of sand was in bag before and on concrete afterwards, color of paint was clear before and obscured afterwards, location of salt was in bag before and on step afterwards, texture of paint was slippery before and gritty afterwards\n###\n"}
{"prompt": "Paint the steps with clear paving paint. Sprinkle fine sand over the wet paint. Brush away any excess sand. Now, what happens?\n", "completion": "texture of sand was loose before and removed afterwards, cleanness of brush was clean before and sandy afterwards, cleanness of brush was clean before and dirty afterwards, location of salt was on step before and removed afterwards, thickness of sand layer was thicker before and thinner afterwards, location of excess sand was on paint before and brushed away afterwards\n###\n"}
{"prompt": "Paint the steps with clear paving paint. Sprinkle fine sand over the wet paint. Brush away any excess sand. Allow to dry. Now, what happens?\n", "completion": "moisture of step was wet before and dry afterwards, moisture of salt was wet before and dry afterwards, texture of step was slippery before and rough afterwards, hardness of paint was soft before and hard afterwards, texture of paint was damp before and dry afterwards, state of paint was wet before and dry afterwards, wetness of step was wet before and dry afterwards, moisture of paint was wet before and dry afterwards, odor of paint was strong smelling before and plain smelling afterwards\n###\n"}
{"prompt": "This may need to be the only step taken for some people. Now, what happens?\n", "completion": "cleanness of cartridge was dusty before and clean afterwards, knowledge of you was unaware that it might only take one step before and now aware it might only take one step afterwards, state of anti dust was closed before and open afterwards, pressure of sprey button was unpressed before and pressed afterwards, state of hands was empty before and holding things afterwards\n###\n"}
{"prompt": "This may need to be the only step taken for some people. If that didn&#x27;t work, take a q-tip and dip it in the water quickly, don&#x27;t hold it under long. Now, what happens?\n", "completion": "location of q-tip was in it's box before and in the hand afterwards, location of the q-tip was out of water before and in water afterwards, weight of the q-tip was lighter before and heavier afterwards, state of q-tip was dry before and wet afterwards, wetness of bowl/bottle top was dry before and wet afterwards, state of bowl/bottle top was empty before and is filled with water afterwards, wetness of q-tip was dry before and wet afterwards, state of the q-tip was dry before and wet afterwards\n###\n"}
{"prompt": "This may need to be the only step taken for some people. If that didn&#x27;t work, take a q-tip and dip it in the water quickly, don&#x27;t hold it under long. Now, take the damp side and stick it in the cartridge and gently wipe it from side to side. Now, what happens?\n", "completion": "cleanness of the q-tip was cleaner before and dirtier afterwards, location of q-tip was in air before and on the cartridge afterwards, cleanness of q-tip was celan before and dirty afterwards, state of cartrige was dirty before and clean afterwards, state of the q-tip was wetter before and drier afterwards, state of the game cartridge was dry before and wet afterwards, location of the q-tip was out before and now in the cartridge afterwards, weight of the q-tip was heavier before and lighter afterwards, cleanness of cartridge was dirty before and clean afterwards\n###\n"}
{"prompt": "This may need to be the only step taken for some people. If that didn&#x27;t work, take a q-tip and dip it in the water quickly, don&#x27;t hold it under long. Now, take the damp side and stick it in the cartridge and gently wipe it from side to side. Turn the q-tip to the dry side and do the same as with the wet side. Now, what happens?\n", "completion": "state of cartridge was wet before and dry afterwards, postition of the q-tip was in the cartridge with the wet side before and in the cartridge with the dry side afterwards, wetness of cartridge was wet before and dry afterwards, state of the game cartridge was wet before and dry afterwards, wetness of q-tip was dry before and wet afterwards\n###\n"}
{"prompt": "Thoroughly clean out a 1 US-quart (950 ml) wide mouth canning jar. Now, what happens?\n", "completion": "cleanness of jar was dirty before and cleaner afterwards, power of water was off before and on afterwards, state of jar was dirty before and cleaned afterwards, moisture of sponge was dry before and wet afterwards, moisture of jar was dry before and wet afterwards, cleanness of canning jar was dirtier before and cleaner afterwards, cleanness of jar was dirty before and clean afterwards, wetness of canning jar was dry before and wet afterwards\n###\n"}
{"prompt": "Thoroughly clean out a 1 US-quart (950 ml) wide mouth canning jar. Be sure to follow the list from top to bottom; starting the layers with the sugar first and raisins last. Now, what happens?\n", "completion": "fullness of jar was empty before and full afterwards, state of ingredients was separate before and layered afterwards, location of sugar was in a bag before and in the jar afterwards, weight of jar was lighter before and heavier afterwards, weight of canning jar was lighter before and heavier afterwards, location of ingredients was in their place before and in canning jar afterwards, cleanness of canning jar was clean before and dirtier afterwards, dryness of jar was wet before and dry afterwards, fullness of canning jar was empty before and full afterwards\n###\n"}
{"prompt": "Thoroughly clean out a 1 US-quart (950 ml) wide mouth canning jar. Be sure to follow the list from top to bottom; starting the layers with the sugar first and raisins last. Place the lid and firmly tighten it. Now, what happens?\n", "completion": "opening of jar was open before and closed afterwards, state of lid was loose before and tight afterwards, tightness of lid was loose before and secured afterwards, weight of jar was lighter before and heavier afterwards, state of jar was uncovered before and sealed afterwards, state of canning jar was open before and closed afterwards, tightness of lid was loose before and tight afterwards, sealing of contents was exposed before and sealed afterwards\n###\n"}
[truncated: 1,948,758 more chars]
