# Supplementary material
Source: ML conference proceedings conference paper supplement (https://aclanthology.org/2023.findings-eacl.31)
Supplement: dataset [file 2023.findings-eacl.31.dataset.zip › causal_reasoning_of_entities_and_events/gpt3/legacy_trials/weiqiu1.0/prompts/1hop_0hop.txt]

I want to sear a steak.
First, I start.
Second, I set the steak at room temperature.
Third, I heat the pan. Now the pan is more likely to be hot.
Is it more likely or less likely that I touch the pan without getting burned?
###
less likely
