# Supplementary material
Source: ML conference proceedings conference paper supplement (https://aclanthology.org/2023.findings-eacl.31)
Supplement: dataset [file 2023.findings-eacl.31.dataset.zip › causal_reasoning_of_entities_and_events/gpt3/plain_prompt/README.md]

To run GPT3 with plain prompt, do
```
python gpt3.py --n_shots [number of shots] --seed [set seed to control randomness] --dataset [choose from "test" or "dev"] --api_path [path to the openai api key file]
```
