# Supplementary material
Source: ML conference proceedings conference paper supplement (https://aclanthology.org/2023.findings-eacl.31)
Supplement: dataset [file 2023.findings-eacl.31.dataset.zip › causal_reasoning_of_entities_and_events/gpt3/README.md]

GPT-3 Scripts

`plain_prompt` stores the script and prompt to run GPT3 without fancy prompting.

`CoT` stores the script and prompt to run GPT3 with chain-of-thought prompting ([Wei et al., 2022](https://arxiv.org/abs/2201.11903)).

`self_ask` stores the script and prompt to run GPT3 with Self-Ask prompting ([Press et al., 2022](https://ofir.io/self-ask.pdf)).
