# Supplementary material
Source: ML conference proceedings conference paper supplement (https://aclanthology.org/2023.findings-eacl.31)
Supplement: dataset [file 2023.findings-eacl.31.dataset.zip › causal_reasoning_of_entities_and_events/gpt3/self_ask/no_CoT/README.md]

GPT-3 Using the _Self Ask_ Prompt: https://ofir.io/self-ask.pdf

This script use Self-Ask with **No Chain-of-Thought Prompting** 

To run, use

```
python openai_models --data_path [path to CREPE dataset] --key [path to OpenAI API key]
```

After running, script will save a file named `gpt3_result_dict.pkl` which contains GPT-3 results stored as list of dictionaries. 

In addition, a confusion matrix named `conf_mtx.png` will be saved to the same folder.
