# Supplementary material
Source: ML conference proceedings conference paper supplement (https://aclanthology.org/2023.findings-eacl.31)
Supplement: dataset [file 2023.findings-eacl.31.dataset.zip › causal_reasoning_of_entities_and_events/gpt3/self_ask/README.md]

`full_pipeline` contains script and prompt needed to run GPT3 and Self-Ask prompting.

`no_CoT` contains script and prompt needed to run GPT3 with Self-Ask-style prompt but without intermediate reasoning steps.

`gold_entity` contains script and prompt needed to run GPT3 and Self-Ask. In addition, gold entity state changes are provided to conduct intermediate reasoning.
