# Supplementary material
Source: ML conference proceedings conference paper supplement (https://aclanthology.org/2023.findings-eacl.31)
Supplement: dataset [file 2023.findings-eacl.31.dataset.zip › causal_reasoning_of_entities_and_events/naive/README.md]

# Usage
`python chance.py` to predict a random tri-class label
`python majority.py` to always predict "equally likely"

# Performance
Chance: .26
Majority: .30
