# Supplementary material
Source: ML conference proceedings conference paper supplement (https://aclanthology.org/2023.findings-eacl.31)
Supplement: dataset [file 2023.findings-eacl.31.dataset.zip › causal_reasoning_of_entities_and_events/openpi/0hop-pred-unique.json]

{
    "1": {
        "goal": "Sear a steak",
        "annotator": "Harry",
        "steps": [
            [
                {
                    "type": "step",
                    "step": "Start."
                }
            ],
            [
                {
                    "type": "step",
                    "step": "Set the steak at room temperature."
                },
                {
                    "type": "openpi_entity",
                    "entity": "steel rod",
                    "attribute": "hot",
                    "change": "more likely"
                },
                {
                    "type": "openpi_entity",
                    "entity": "steel rod",
                    "attribute": "cold",
                    "change": "less likely"
                },
                {
                    "type": "openpi_entity",
                    "entity": "pan",
                    "attribute": "hot",
                    "change": "more likely"
                },
                {
                    "type": "openpi_entity",
                    "entity": "pan",
                    "attribute": "cold",
                    "change": "less likely"
                },
                {
                    "type": "openpi_entity",
                    "entity": "steak",
                    "attribute": "heated",
                    "change": "more likely"
                },
                {
                    "type": "openpi_entity",
                    "entity": "steak",
                    "attribute": "room temperature",
                    "change": "less likely"
                },
                {
                    "type": "openpi_entity",
                    "entity": "temperature",
                    "attribute": "set",
                    "change": "more likely"
                },
                {
                    "type": "openpi_entity",
                    "entity": "temperature",
                    "attribute": "unset",
                    "change": "less likely"
                },
                {
                    "type": "openpi_entity",
                    "entity": "thermostat",
                    "attribute": "turned on",
                    "change": "more likely"
                },
                {
                    "type": "openpi_entity",
                    "entity": "thermostat",
                    "attribute": "turned off",
                    "change": "less likely"
                },
                {
                    "type": "openpi_entity",
                    "entity": "pot",
                    "attribute": "hot",
                    "change": "more likely"
                },
                {
                    "type": "openpi_entity",
                    "entity": "pot",
                    "attribute": "cold",
                    "change": "less likely"
                },
                {
                    "type": "openpi_entity",
                    "entity": "stove",
                    "attribute": "hot",
                    "change": "more likely"
                },
                {
                    "type": "openpi_entity",
                    "entity": "stove",
                    "attribute": "cold",
                    "change": "less likely"
                },
                {
                    "type": "openpi_entity",
                    "entity": "room",
                    "attribute": "hot",
                    "change": "more likely"
                },
                {
                    "type": "openpi_entity",
                    "entity": "room",
                    "attribute": "cold",
                    "change": "less likely"
                },
                {
                    "type": "openpi_entity",
                    "entity": "food",
                    "attribute": "hot",
                    "change": "more likely"
                },
                {
                    "type": "openpi_entity",
                    "entity": "food",
                    "attribute": "cold",
                    "change": "less likely"
                }
            ],
            [
                {
                    "type": "step",
                    "step": "Heat the pan."
                },
                {
                    "type": "entity",
                    "entity": "the pan",
                    "attribute": "hot",
                    "change": "more likely"
                },
                {
                    "type": "multihop",
                    "event": "I touch the pan without getting burned.",
                    "change": "less likely"
                },
                {
                    "type": "openpi_entity",
                    "entity": "pan",
                    "attribute": "hot",
                    "change": "more likely"
                },
                {
                    "type": "openpi_entity",
                    "entity": "pan",
                    "attribute": "cool",
                    "change": "less likely"
                },
                {
                    "type": "openpi_entity",
                    "entity": "stove",
                    "attribute": "on",
                    "change": "more likely"
                },
                {
                    "type": "openpi_entity",
                    "entity": "stove",
                    "attribute": "off",
                    "change": "less likely"
                },
                {
                    "type": "openpi_entity",
                    "entity": "stove burner",
                    "attribute": "hot",
                    "change": "more likely"
                },
                {
                    "type": "openpi_entity",
                    "entity": "stove burner",
                    "attribute": "cool",
                    "change": "less likely"
                },
                {
                    "type": "openpi_entity",
                    "entity": "stove burner",
                    "attribute": "cold",
                    "change": "less likely"
                },
                {
                    "type": "openpi_entity",
                    "entity": "stove",
                    "attribute": "in storage",
                    "change": "more likely"
                },
                {
                    "type": "openpi_entity",
                    "entity": "stove",
                    "attribute": "in unit",
                    "change": "less likely"
                },
                {
                    "type": "openpi_entity",
                    "entity": "pan",
                    "attribute": "cold",
                    "change": "less likely"
                }
            ],
            [
                {
                    "type": "step",
                    "step": "Put olive oil in the pan until smoking."
                },
                {
                    "type": "entity",
                    "entity": "the pan",
                    "attribute": "greased",
                    "change": "more likely"
                },
                {
                    "type": "multihop",
                    "event": "A sizzling sound can be heard if I add vegetables to the pan.",
                    "change": "more likely"
                },
                {
                    "type": "openpi_entity",
                    "entity": "olive oil",
                    "attribute": "in pan",
                    "change": "more likely"
                },
                {
                    "type": "openpi_entity",
                    "entity": "olive oil",
                    "attribute": "in container",
                    "change": "less likely"
                },
                {
                    "type": "openpi_entity",
                    "entity": "pan",
                    "attribute": "hot",
                    "change": "more likely"
                },
                {
                    "type": "openpi_entity",
                    "entity": "pan",
                    "attribute": "cool",
                    "change": "less likely"
                },
                {
                    "type": "openpi_entity",
                    "entity": "smoke",
                    "attribute": "present",
                    "change": "more likely"
                },
                {
                    "type": "openpi_entity",
                    "entity": "smoke",
                    "attribute": "absent",
                    "change": "less likely"
                },
                {
                    "type": "openpi_entity",
                    "entity": "pan",
                    "attribute": "empty",
                    "change": "less likely"
                },
                {
                    "type": "openpi_entity",
                    "entity": "olive oil",
                    "attribute": "hot",
                    "change": "more likely"
                },
                {
                    "type": "openpi_entity",
                    "entity": "olive oil",
                    "attribute": "cool",
                    "change": "less likely"
                },
                {
                    "type": "openpi_entity",
                    "entity": "pan",
                    "attribute": "spicy smelling",
                    "change": "more likely"
                },
                {
                    "type": "openpi_entity",
                    "entity": "pan",
                    "attribute": "bland smelling",
                    "change": "less likely"
                },
                {
                    "type": "openpi_entity",
                    "entity": "oil temperature",
                    "attribute": "set",
                    "change": "more likely"
                },
                {
                    "type": "openpi_entity",
                    "entity": "oil temperature",
                    "attribute": "unset",
                    "change": "less likely"
                }
            ],
            [
                {
                    "type": "step",
                    "step": "Add the steak and sear until both sides are browned."
                },
                {
                    "type": "entity",
                    "entity": "the steak",
                    "attribute": "cooked",
                    "change": "more likely"
                },
                {
                    "type": "multihop",
                    "event": "I eat the steak without getting sick.",
                    "change": "more likely"
                },
                {
                    "type": "openpi_entity",
                    "entity": "avoyard",
                    "attribute": "hot",
                    "change": "more likely"
                },
                {
                    "type": "openpi_entity",
                    "entity": "avoyard",
                    "attribute": "cool",
                    "change": "less likely"
                },
                {
                    "type": "openpi_entity",
                    "entity": "skillet",
                    "attribute": "dark",
                    "change": "more likely"
                },
                {
                    "type": "openpi_entity",
                    "entity": "skillet",
                    "attribute": "shiny",
                    "change": "less likely"
                },
                {
                    "type": "openpi_entity",
                    "entity": "skillet",
                    "attribute": "wet",
                    "change": "more likely"
                },
                {
                    "type": "openpi_entity",
                    "entity": "skillet",
                    "attribute": "dry",
                    "change": "less likely"
                },
                {
                    "type": "openpi_entity",
                    "entity": "oil",
                    "attribute": "browned",
                    "change": "more likely"
                },
                {
                    "type": "openpi_entity",
                    "entity": "oil",
                    "attribute": "white",
                    "change": "less likely"
                },
                {
                    "type": "openpi_entity",
                    "entity": "olive oil",
                    "attribute": "on the pan",
                    "change": "more likely"
                },
                {
                    "type": "openpi_entity",
                    "entity": "olive oil",
                    "attribute": "in a bottle",
                    "change": "less likely"
                },
                {
                    "type": "openpi_entity",
                    "entity": "skillet",
                    "attribute": "dirty",
                    "change": "more likely"
                },
                {
                    "type": "openpi_entity",
                    "entity": "skillet",
                    "attribute": "clean",
                    "change": "less likely"
                },
                {
                    "type": "openpi_entity",
                    "entity": "steak",
                    "attribute": "cooked",
                    "change": "more likely"
                },
                {
                    "type": "openpi_entity",
                    "entity": "steak",
                    "attribute": "raw",
                    "change": "less likely"
                },
                {
                    "type": "openpi_entity",
                    "entity": "avoyard",
                    "attribute": "browned",
                    "change": "more likely"
                },
                {
                    "type": "openpi_entity",
                    "entity": "avoyard",
                    "attribute": "white",
                    "change": "less likely"
                },
                {
                    "type": "openpi_entity",
                    "entity": "oil",
                    "attribute": "hot",
                    "change": "more likely"
                },
                {
                    "type": "openpi_entity",
                    "entity": "oil",
                    "attribute": "cool",
                    "change": "less likely"
                }
            ],
            [
                {
                    "type": "step",
                    "step": "Place the pan in the oven until desired cookedness."
                },
                {
                    "type": "entity",
                    "entity": "the steak",
                    "attribute": "cooked",
                    "change": "more likely"
                },
                {
                    "type": "multihop",
                    "event": "I eat the steak without getting sick.",
                    "change": "more likely"
                },
                {
                    "type": "openpi_entity",
                    "entity": "food",
                    "attribute": "hot",
                    "change": "more likely"
                },
                {
                    "type": "openpi_entity",
                    "entity": "food",
                    "attribute": "cool",
                    "change": "less likely"
                },
                {
                    "type": "openpi_entity",
                    "entity": "pan",
                    "attribute": "cooked",
                    "change": "more likely"
                },
                {
                    "type": "openpi_entity",
                    "entity": "pan",
                    "attribute": "uncooked",
                    "change": "less likely"
                },
                {
                    "type": "openpi_entity",
                    "entity": "oven",
                    "attribute": "on",
                    "change": "more likely"
                },
                {
                    "type": "openpi_entity",
                    "entity": "oven",
                    "attribute": "off",
                    "change": "less likely"
                },
                {
                    "type": "openpi_entity",
                    "entity": "plate",
                    "attribute": "hot",
                    "change": "more likely"
                },
                {
                    "type": "openpi_entity",
                    "entity": "plate",
                    "attribute": "cold",
                    "change": "less likely"
                },
                {
                    "type": "openpi_entity",
                    "entity": "food",
                    "attribute": "cold",
                    "change": "less likely"
                },
                {
                    "type": "openpi_entity",
                    "entity": "stove",
                    "attribute": "on",
                    "change": "more likely"
                },
                {
                    "type": "openpi_entity",
                    "entity": "stove",
                    "attribute": "off",
                    "change": "less likely"
                },
                {
                    "type": "openpi_entity",
                    "entity": "food",
                    "attribute": "cooked",
                    "change": "more likely"
                },
                {
                    "type": "openpi_entity",
                    "entity": "food",
                    "attribute": "raw",
                    "change": "less likely"
                },
                {
                    "type": "openpi_entity",
                    "entity": "pan",
                    "attribute": "in oven",
                    "change": "more likely"
                },
                {
                    "type": "openpi_entity",
                    "entity": "pan",
                    "attribute": "drawer",
                    "change": "less likely"
                },
                {
                    "type": "openpi_entity",
                    "entity": "oil",
                    "attribute": "hot",
                    "change": "more likely"
                },
                {
                    "type": "openpi_entity",
                    "entity": "oil",
                    "attribute": "cold",
                    "change": "less likely"
                },
                {
                    "type": "openpi_entity",
                    "entity": "pan",
                    "attribute": "hot",
                    "change": "more likely"
                },
                {
                    "type": "openpi_entity",
                    "entity": "pan",
                    "attribute": "cold",
                    "change": "less likely"
                }
            ],
            [
                {
                    "type": "step",
                    "step": "Remove the steak from the pan and serve with sauce."
                },
                {
                    "type": "openpi_entity",
                    "entity": "plate",
                    "attribute": "on the table",
                    "change": "more likely"
                },
                {
                    "type": "openpi_entity",
                    "entity": "plate",
                    "attribute": "in the cabinet",
                    "change": "less likely"
                },
                {
                    "type": "openpi_entity",
                    "entity": "pan",
                    "attribute": "off stove",
                    "change": "more likely"
                },
                {
                    "type": "openpi_entity",
                    "entity": "pan",
                    "attribute": "on stove",
                    "change": "less likely"
                },
                {
                    "type": "openpi_entity",
                    "entity": "the food",
                    "attribute": "seasoned",
                    "change": "more likely"
                },
                {
                    "type": "openpi_entity",
                    "entity": "the food",
                    "attribute": "unseasoned",
                    "change": "less likely"
                },
                {
                    "type": "openpi_entity",
                    "entity": "plate",
                    "attribute": "dirty",
                    "change": "more likely"
                },
                {
                    "type": "openpi_entity",
                    "entity": "plate",
                    "attribute": "clean",
                    "change": "less likely"
                },
                {
                    "type": "openpi_entity",
                    "entity": "plate",
                    "attribute": "hot",
                    "change": "more likely"
                },
                {
                    "type": "openpi_entity",
                    "entity": "plate",
                    "attribute": "cool",
                    "change": "less likely"
                },
                {
                    "type": "openpi_entity",
                    "entity": "pan",
                    "attribute": "cool",
                    "change": "more likely"
                },
                {
                    "type": "openpi_entity",
                    "entity": "pan",
                    "attribute": "hot",
                    "change": "less likely"
                },
                {
                    "type": "openpi_entity",
                    "entity": "the pan",
                    "attribute": "out of the oven",
                    "change": "more likely"
                },
                {
                    "type": "openpi_entity",
                    "entity": "the pan",
                    "attribute": "in the oven",
                    "change": "less likely"
                },
                {
                    "type": "openpi_entity",
                    "entity": "sauce",
                    "attribute": "empty",
                    "change": "more likely"
                },
                {
                    "type": "openpi_entity",
                    "entity": "sauce",
                    "attribute": "full",
                    "change": "less likely"
                },
                {
                    "type": "openpi_entity",
                    "entity": "pan",
                    "attribute": "cooler",
                    "change": "more likely"
                },
                {
                    "type": "openpi_entity",
                    "entity": "the food",
                    "attribute": "cooled",
                    "change": "more likely"
                },
                {
                    "type": "openpi_entity",
                    "entity": "the food",
                    "attribute": "hot",
                    "change": "less likely"
                },
                {
                    "type": "openpi_entity",
                    "entity": "pan",
                    "attribute": "on the table",
                    "change": "more likely"
                },
                {
                    "type": "openpi_entity",
                    "entity": "pan",
                    "attribute": "in the cabinet",
                    "change": "less likely"
                }
            ],
            [
                {
                    "type": "step",
                    "step": "Let the pan cool and wash it."
                },
                {
                    "type": "entity",
                    "entity": "the pan",
                    "attribute": "hot",
                    "change": "less likely"
                },
                {
                    "type": "entity",
                    "entity": "the pan",
                    "attribute": "greased",
                    "change": "less likely"
                },
                {
                    "type": "multihop",
                    "event": "I touch the pan without getting burned.",
                    "change": "more likely"
                },
                {
                    "type": "multihop",
                    "event": "A sizzling sound can be heard if I add vegetables to the pan.",
                    "change": "less likely"
                },
                {
                    "type": "openpi_entity",
                    "entity": "pan",
                    "attribute": "clean",
                    "change": "more likely"
                },
                {
                    "type": "openpi_entity",
                    "entity": "pan",
                    "attribute": "dirty",
                    "change": "less likely"
                },
                {
                    "type": "openpi_entity",
                    "entity": "the pan",
                    "attribute": "cooler",
                    "change": "more likely"
                },
                {
                    "type": "openpi_entity",
                    "entity": "the pan",
                    "attribute": "hotter",
                    "change": "less likely"
                },
                {
                    "type": "openpi_entity",
                    "entity": "pan",
                    "attribute": "cool",
                    "change": "more likely"
                },
                {
                    "type": "openpi_entity",
                    "entity": "pan",
                    "attribute": "hot",
                    "change": "less likely"
                },
                {
                    "type": "openpi_entity",
                    "entity": "the pan",
                    "attribute": "cleaner",
                    "change": "more likely"
                },
                {
                    "type": "openpi_entity",
                    "entity": "the pan",
                    "attribute": "dirtier",
                    "change": "less likely"
                },
                {
                    "type": "openpi_entity",
                    "entity": "sauce",
                    "attribute": "cooler",
                    "change": "more likely"
                },
                {
                    "type": "openpi_entity",
                    "entity": "sauce",
                    "attribute": "hotter",
                    "change": "less likely"
                },
                {
                    "type": "openpi_entity",
                    "entity": "the pan",
                    "attribute": "drier",
                    "change": "more likely"
                },
                {
                    "type": "openpi_entity",
                    "entity": "the pan",
                    "attribute": "wetter",
                    "change": "less likely"
                },
                {
                    "type": "openpi_entity",
                    "entity": "pan",
                    "attribute": "dry",
                    "change": "more likely"
                },
                {
                    "type": "openpi_entity",
                    "entity": "pan",
                    "attribute": "wet",
                    "change": "less likely"
                },
                {
                    "type": "openpi_entity",
                    "entity": "the pan",
                    "attribute": "in the oven",
                    "change": "more likely"
                },
                {
                    "type": "openpi_entity",
                    "entity": "the pan",
                    "attribute": "out of the oven",
                    "change": "less likely"
                }
            ]
        ]
    },
    "2": {
        "goal": "Do laundry with a washing machine",
        "annotator": "Harry",
        "steps": [
            [
                {
                    "type": "step",
                    "step": "Start."
                }
            ],
            [
                {
                    "type": "step",
                    "step": "Open the door of the washing machine."
                },
                {
                    "type": "openpi_entity",
                    "entity": "room",
                    "attribute": "noisy",
                    "change": "more likely"
                },
                {
                    "type": "openpi_entity",
                    "entity": "room",
                    "attribute": "peaceful",
                    "change": "less likely"
                },
                {
                    "type": "openpi_entity",
                    "entity": "door",
                    "attribute": "open",
                    "change": "more likely"
                },
                {
                    "type": "openpi_entity",
                    "entity": "door",
                    "attribute": "shut",
                    "change": "less likely"
                },
                {
                    "type": "openpi_entity",
                    "entity": "door",
                    "attribute": "open",
                    "change": "more likely"
                },
                {
                    "type": "openpi_entity",
                    "entity": "door",
                    "attribute": "closed",
                    "change": "less likely"
                },
                {
                    "type": "openpi_entity",
                    "entity": "washing machine",
                    "attribute": "on",
                    "change": "more likely"
                },
                {
                    "type": "openpi_entity",
                    "entity": "washing machine",
                    "attribute": "off",
                    "change": "less likely"
                },
                {
                    "type": "openpi_entity",
                    "entity": "door",
                    "attribute": "open",
                    "change": "more likely"
                },
                {
                    "type": "openpi_entity",
                    "entity": "door",
                    "attribute": "closed",
                    "change": "less likely"
                }
            ],
            [
                {
                    "type": "step",
                    "step": "Put the laundry inside the washing machine."
                },
                {
                    "type": "openpi_entity",
                    "entity": "laundry",
                    "attribute": "inside the machine",
                    "change": "more likely"
                },
                {
                    "type": "openpi_entity",
                    "entity": "laundry",
                    "attribute": "outside of the machine",
                    "change": "less likely"
                },
                {
                    "type": "openpi_entity",
                    "entity": "washing machine",
                    "attribute": "heavier",
                    "change": "more likely"
                },
                {
                    "type": "openpi_entity",
                    "entity": "washing machine",
                    "attribute": "lighter",
                    "change": "less likely"
                },
                {
                    "type": "openpi_entity",
                    "entity": "door",
                    "attribute": "open",
                    "change": "more likely"
                },
                {
                    "type": "openpi_entity",
                    "entity": "door",
                    "attribute": "closed",
                    "change": "less likely"
                },
                {
                    "type": "openpi_entity",
                    "entity": "laundry",
                    "attribute": "inside of machine",
                    "change": "more likely"
                },
                {
                    "type": "openpi_entity",
                    "entity": "laundry",
                    "attribute": "outside of machine",
                    "change": "less likely"
                },
                {
                    "type": "openpi_entity",
                    "entity": "washing machine",
                    "attribute": "on",
                    "change": "more likely"
                },
                {
                    "type": "openpi_entity",
                    "entity": "washing machine",
                    "attribute": "off",
                    "change": "less likely"
                },
                {
                    "type": "openpi_entity",
                    "entity": "machine",
                    "attribute": "on counter",
                    "change": "more likely"
                },
                {
                    "type": "openpi_entity",
                    "entity": "machine",
                    "attribute": "in cupboard",
                    "change": "less likely"
                },
                {
                    "type": "openpi_entity",
                    "entity": "door",
                    "attribute": "open",
                    "change": "more likely"
                },
                {
                    "type": "openpi_entity",
                    "entity": "door",
                    "attribute": "closed",
                    "change": "less likely"
                }
            ],
            [
                {
                    "type": "step",
                    "step": "Close the door."
                },
                {
                    "type": "openpi_entity",
                    "entity": "door",
                    "attribute": "open",
                    "change": "more likely"
                },
                {
                    "type": "openpi_entity",
                    "entity": "door",
                    "attribute": "closed",
                    "change": "less likely"
                },
                {
                    "type": "openpi_entity",
                    "entity": "laundry",
                    "attribute": "outside",
                    "change": "more likely"
                },
                {
                    "type": "openpi_entity",
                    "entity": "laundry",
                    "attribute": "inside",
                    "change": "less likely"
                },
                {
                    "type": "openpi_entity",
                    "entity": "room",
                    "attribute": "loud",
                    "change": "more likely"
                },
                {
                    "type": "openpi_entity",
                    "entity": "room",
                    "attribute": "quiet",
                    "change": "less likely"
                },
                {
                    "type": "openpi_entity",
                    "entity": "door",
                    "attribute": "open",
                    "change": "more likely"
                },
                {
                    "type": "openpi_entity",
                    "entity": "door",
                    "attribute": "closed",
                    "change": "less likely"
                },
                {
                    "type": "openpi_entity",
                    "entity": "washing machine",
                    "attribute": "turned on",
                    "change": "more likely"
                },
                {
                    "type": "openpi_entity",
                    "entity": "washing machine",
                    "attribute": "turned off",
                    "change": "less likely"
                },
                {
                    "type": "openpi_entity",
                    "entity": "door",
                    "attribute": "unlocked",
                    "change": "more likely"
                },
                {
                    "type": "openpi_entity",
                    "entity": "door",
                    "attribute": "locked",
                    "change": "less likely"
                },
                {
                    "type": "openpi_entity",
                    "entity": "door",
                    "attribute": "open",
                    "change": "more likely"
                },
                {
                    "type": "openpi_entity",
                    "entity": "door",
                    "attribute": "closed",
                    "change": "less likely"
                },
                {
                    "type": "openpi_entity",
                    "entity": "washing machine",
                    "attribute": "on",
                    "change": "more likely"
                },
                {
                    "type": "openpi_entity",
                    "entity": "washing machine",
                    "attribute": "off",
                    "change": "less likely"
                }
            ],
            [
                {
                    "type": "step",
                    "step": "Add detergents to the detergent compartment."
                },
                {
                    "type": "openpi_entity",
                    "entity": "laundry container",
                    "attribute": "emptier",
                    "change": "more likely"
                },
                {
                    "type": "openpi_entity",
                    "entity": "laundry container",
                    "attribute": "fuller",
                    "change": "less likely"
                },
                {
                    "type": "openpi_entity",
                    "entity": "laundry compartment",
                    "attribute": "emptier",
                    "change": "more likely"
                },
                {
                    "type": "openpi_entity",
                    "entity": "laundry compartment",
                    "attribute": "fuller",
                    "change": "less likely"
                },
                {
                    "type": "openpi_entity",
                    "entity": "detergent container",
                    "attribute": "lighter",
                    "change": "more likely"
                },
                {
                    "type": "openpi_entity",
                    "entity": "detergent container",
                    "attribute": "heavier",
                    "change": "less likely"
                },
                {
                    "type": "openpi_entity",
                    "entity": "detergent",
                    "attribute": "neutral smelling",
                    "change": "more likely"
                },
                {
                    "type": "openpi_entity",
                    "entity": "detergent",
                    "attribute": "strong smelling",
                    "change": "less likely"
                },
                {
                    "type": "openpi_entity",
                    "entity": "lid",
                    "attribute": "off door",
                    "change": "more likely"
                },
                {
                    "type": "openpi_entity",
                    "entity": "lid",
                    "attribute": "on door",
                    "change": "less likely"
                },
                {
                    "type": "openpi_entity",
                    "entity": "detergent",
                    "attribute": "in washing machine",
                    "change": "more likely"
                },
                {
                    "type": "openpi_entity",
                    "entity": "detergent",
                    "attribute": "in bottle",
                    "change": "less likely"
                },
                {
                    "type": "openpi_entity",
                    "entity": "detergents",
                    "attribute": "in washing machine",
                    "change": "more likely"
                },
                {
                    "type": "openpi_entity",
                    "entity": "detergents",
                    "attribute": "in container",
                    "change": "less likely"
                }
            ],
            [
                {
                    "type": "step",
                    "step": "Choose a cycle."
                },
                {
                    "type": "openpi_entity",
                    "entity": "detergent",
                    "attribute": "in the drain",
                    "change": "more likely"
                },
                {
                    "type": "openpi_entity",
                    "entity": "detergent",
                    "attribute": "in container",
                    "change": "less likely"
                },
                {
                    "type": "openpi_entity",
                    "entity": "person",
                    "attribute": "learned to cycle",
                    "change": "more likely"
                },
                {
                    "type": "openpi_entity",
                    "entity": "person",
                    "attribute": "cycle pediculous",
                    "change": "less likely"
                }
            ],
            [
                {
                    "type": "step",
                    "step": "Press start and wait for the cycle to finish."
                },
                {
                    "type": "entity",
                    "entity": "the clothes",
                    "attribute": "wet",
                    "change": "more likely"
                },
                {
                    "type": "entity",
                    "entity": "the washing machine door",
                    "attribute": "locked",
                    "change": "more likely"
                },
                {
                    "type": "multihop",
                    "event": "I wear the clothes and stay dry.",
                    "change": "less likely"
                },
                {
                    "type": "multihop",
                    "event": "I push to open the door of the washing machine.",
                    "change": "less likely"
                },
                {
                    "type": "openpi_entity",
                    "entity": "the door",
                    "attribute": "open",
                    "change": "more likely"
                },
                {
                    "type": "openpi_entity",
                    "entity": "the door",
                    "attribute": "closed",
                    "change": "less likely"
                },
                {
                    "type": "openpi_entity",
                    "entity": "timer",
                    "attribute": "on",
                    "change": "more likely"
                },
                {
                    "type": "openpi_entity",
                    "entity": "timer",
                    "attribute": "off",
                    "change": "less likely"
                },
                {
                    "type": "openpi_entity",
                    "entity": "the door",
                    "attribute": "less full",
                    "change": "more likely"
                },
                {
                    "type": "openpi_entity",
                    "entity": "the door",
                    "attribute": "fuller",
                    "change": "less likely"
                },
                {
                    "type": "openpi_entity",
                    "entity": "start",
                    "attribute": "started",
                    "change": "more likely"
                },
                {
                    "type": "openpi_entity",
                    "entity": "start",
                    "attribute": "unstarted",
                    "change": "less likely"
                },
                {
                    "type": "openpi_entity",
                    "entity": "washing machine",
                    "attribute": "turned on",
                    "change": "more likely"
                },
                {
                    "type": "openpi_entity",
                    "entity": "washing machine",
                    "attribute": "turned off",
                    "change": "less likely"
                },
                {
                    "type": "openpi_entity",
                    "entity": "door",
                    "attribute": "open",
                    "change": "more likely"
                },
                {
                    "type": "openpi_entity",
                    "entity": "door",
                    "attribute": "closed",
                    "change": "less likely"
                },
                {
                    "type": "openpi_entity",
                    "entity": "cycle",
                    "attribute": "finished",
                    "change": "more likely"
                },
                {
                    "type": "openpi_entity",
                    "entity": "cycle",
                    "attribute": "complete",
                    "change": "less likely"
                },
                {
                    "type": "openpi_entity",
                    "entity": "power",
                    "attribute": "on",
                    "change": "more likely"
                },
                {
                    "type": "openpi_entity",
                    "entity": "power",
                    "attribute": "off",
                    "change": "less likely"
                }
            ],
            [
                {
                    "type": "step",
                    "step": "When the cycle ends, move the clothes to the dryer."
                },
                {
                    "type": "entity",
                    "entity": "the washing machine door",
                    "attribute": "locked",
                    "change": "less likely"
                },
                {
                    "type": "entity",
                    "entity": "the clothes",
                    "attribute": "clean",
                    "change": "more likely"
                },
                {
                    "type": "multihop",
                    "event": "I push to open the door of the washing machine.",
                    "change": "more likely"
                },
                {
                    "type": "openpi_entity",
                    "entity": "detergent",
                    "attribute": "in laundry",
                    "change": "more likely"
                },
                {
                    "type": "openpi_entity",
                    "entity": "detergent",
                    "attribute": "in bottle",
                    "change": "less likely"
                },
                {
                    "type": "openpi_entity",
                    "entity": "laundry",
                    "attribute": "in drying rack",
                    "change": "more likely"
                },
                {
                    "type": "openpi_entity",
                    "entity": "laundry",
                    "attribute": "in basket",
                    "change": "less likely"
                },
                {
                    "type": "openpi_entity",
                    "entity": "laundry",
                    "attribute": "dry",
                    "change": "more likely"
                },
                {
                    "type": "openpi_entity",
                    "entity": "laundry",
                    "attribute": "wet",
                    "change": "less likely"
                },
                {
                    "type": "openpi_entity",
                    "entity": "washing machine",
                    "attribute": "turned on",
                    "change": "more likely"
                },
                {
                    "type": "openpi_entity",
                    "entity": "washing machine",
                    "attribute": "turned off",
                    "change": "less likely"
                },
                {
                    "type": "openpi_entity",
                    "entity": "the basket",
                    "attribute": "empty",
                    "change": "more likely"
                },
                {
                    "type": "openpi_entity",
                    "entity": "the basket",
                    "attribute": "fuller",
                    "change": "less likely"
                },
                {
                    "type": "openpi_entity",
                    "entity": "washing machine",
                    "attribute": "on",
                    "change": "more likely"
                },
                {
                    "type": "openpi_entity",
                    "entity": "washing machine",
                    "attribute": "off",
                    "change": "less likely"
                },
                {
                    "type": "openpi_entity",
                    "entity": "the machine",
                    "attribute": "warmer",
                    "change": "more likely"
                },
                {
                    "type": "openpi_entity",
                    "entity": "the machine",
                    "attribute": "cooler",
                    "change": "less likely"
                }
            ]
        ]
    },
    "3": {
        "goal": "Arrange Flowers in a Vase",
        "annotator": "Harry",
        "steps": [
            [
                {
                    "type": "step",
                    "step": "Start."
                }
            ],
            [
                {
                    "type": "step",
                    "step": "Choose the right vase."
                },
                {
                    "type": "openpi_entity",
                    "entity": "paintbrush",
                    "attribute": "green",
                    "change": "more likely"
                },
                {
                    "type": "openpi_entity",
                    "entity": "paintbrush",
                    "attribute": "white",
                    "change": "less likely"
                },
                {
                    "type": "openpi_entity",
                    "entity": "vase",
                    "attribute": "on counter",
                    "change": "more likely"
                },
                {
                    "type": "openpi_entity",
                    "entity": "vase",
                    "attribute": "in cupboard",
                    "change": "less likely"
                },
                {
                    "type": "openpi_entity",
                    "entity": "paint",
                    "attribute": "in vase",
                    "change": "more likely"
                },
                {
                    "type": "openpi_entity",
                    "entity": "paint",
                    "attribute": "in can",
                    "change": "less likely"
                }
            ],
            [
                {
                    "type": "step",
                    "step": "Use a clear elastic hair tie to gather flowers together."
                },
                {
                    "type": "multihop",
                    "event": "The flowers fall apart.",
                    "change": "less likely"
                },
                {
                    "type": "openpi_entity",
                    "entity": "tie",
                    "attribute": "on the neck and back end of the flower",
                    "change": "more likely"
                },
                {
                    "type": "openpi_entity",
                    "entity": "tie",
                    "attribute": "on the spool",
                    "change": "less likely"
                },
                {
                    "type": "openpi_entity",
                    "entity": "basket",
                    "attribute": "heavier",
                    "change": "more likely"
                },
                {
                    "type": "openpi_entity",
                    "entity": "basket",
                    "attribute": "lighter",
                    "change": "less likely"
                },
                {
                    "type": "openpi_entity",
                    "entity": "ribbon",
                    "attribute": "on the table",
                    "change": "more likely"
                },
                {
                    "type": "openpi_entity",
                    "entity": "ribbon",
                    "attribute": "in the closet",
                    "change": "less likely"
                },
                {
                    "type": "openpi_entity",
                    "entity": "elastic hair tie",
                    "attribute": "on the table",
                    "change": "more likely"
                },
                {
                    "type": "openpi_entity",
                    "entity": "elastic hair tie",
                    "attribute": "in a basket",
                    "change": "less likely"
                },
                {
                    "type": "openpi_entity",
                    "entity": "flower",
                    "attribute": "adorned with a ribbon",
                    "change": "more likely"
                },
                {
                    "type": "openpi_entity",
                    "entity": "flower",
                    "attribute": "unadorned",
                    "change": "less likely"
                },
                {
                    "type": "openpi_entity",
                    "entity": "table",
                    "attribute": "decorated",
                    "change": "more likely"
                },
                {
                    "type": "openpi_entity",
                    "entity": "table",
                    "attribute": "bare",
                    "change": "less likely"
                },
                {
                    "type": "openpi_entity",
                    "entity": "elastic hair tie",
                    "attribute": "tied from the spool to the flower",
                    "change": "more likely"
                },
                {
                    "type": "openpi_entity",
                    "entity": "elastic hair tie",
                    "attribute": "untied",
                    "change": "less likely"
                },
                {
                    "type": "openpi_entity",
                    "entity": "elastic hair tie",
                    "attribute": "attached to flower",
                    "change": "more likely"
                },
                {
                    "type": "openpi_entity",
                    "entity": "elastic hair tie",
                    "attribute": "loose",
                    "change": "less likely"
                }
            ],
            [
                {
                    "type": "step",
                    "step": "Pour fresh, cool water in your vase."
                },
                {
                    "type": "entity",
                    "entity": "the vase",
                    "attribute": "empty",
                    "change": "less likely"
                },
                {
                    "type": "openpi_entity",
                    "entity": "container",
                    "attribute": "cool",
                    "change": "more likely"
                },
                {
                    "type": "openpi_entity",
                    "entity": "container",
                    "attribute": "warm",
                    "change": "less likely"
                },
                {
                    "type": "openpi_entity",
                    "entity": "vase",
                    "attribute": "wet",
                    "change": "more likely"
                },
                {
                    "type": "openpi_entity",
                    "entity": "vase",
                    "attribute": "dry",
                    "change": "less likely"
                },
                {
                    "type": "openpi_entity",
                    "entity": "container",
                    "attribute": "empty",
                    "change": "more likely"
                },
                {
                    "type": "openpi_entity",
                    "entity": "container",
                    "attribute": "full",
                    "change": "less likely"
                },
                {
                    "type": "openpi_entity",
                    "entity": "vase",
                    "attribute": "full",
                    "change": "more likely"
                },
                {
                    "type": "openpi_entity",
                    "entity": "vase",
                    "attribute": "empty",
                    "change": "less likely"
                },
                {
                    "type": "openpi_entity",
                    "entity": "water",
                    "attribute": "cool",
                    "change": "more likely"
                },
                {
                    "type": "openpi_entity",
                    "entity": "water",
                    "attribute": "warm",
                    "change": "less likely"
                },
                {
                    "type": "openpi_entity",
                    "entity": "bottle",
                    "attribute": "empty",
                    "change": "more likely"
                },
                {
                    "type": "openpi_entity",
                    "entity": "bottle",
                    "attribute": "full",
                    "change": "less likely"
                },
                {
                    "type": "openpi_entity",
                    "entity": "water",
                    "attribute": "wet",
                    "change": "more likely"
                },
                {
                    "type": "openpi_entity",
                    "entity": "water",
                    "attribute": "dry",
                    "change": "less likely"
                },
                {
                    "type": "openpi_entity",
                    "entity": "water",
                    "attribute": "in the vase",
                    "change": "more likely"
                },
                {
                    "type": "openpi_entity",
                    "entity": "water",
                    "attribute": "in the sink",
                    "change": "less likely"
                },
                {
                    "type": "openpi_entity",
                    "entity": "cool water",
                    "attribute": "in vase",
                    "change": "more likely"
                },
                {
                    "type": "openpi_entity",
                    "entity": "cool water",
                    "attribute": "in faucet",
                    "change": "less likely"
                }
            ],
            [
                {
                    "type": "step",
                    "step": "Add a couple of drops of bleach to the water."
                },
                {
                    "type": "openpi_entity",
                    "entity": "bleach",
                    "attribute": "in the water",
                    "change": "more likely"
                },
                {
                    "type": "openpi_entity",
                    "entity": "bleach",
                    "attribute": "in the container",
                    "change": "less likely"
                },
                {
                    "type": "openpi_entity",
                    "entity": "bow tie",
                    "attribute": "wet",
                    "change": "more likely"
                },
                {
                    "type": "openpi_entity",
                    "entity": "bow tie",
                    "attribute": "dry",
                    "change": "less likely"
                },
                {
                    "type": "openpi_entity",
                    "entity": "bow tie",
                    "attribute": "dirty",
                    "change": "more likely"
                },
                {
                    "type": "openpi_entity",
                    "entity": "bow tie",
                    "attribute": "clean",
                    "change": "less likely"
                },
                {
                    "type": "openpi_entity",
                    "entity": "vase",
                    "attribute": "wet",
                    "change": "more likely"
                },
                {
                    "type": "openpi_entity",
                    "entity": "vase",
                    "attribute": "dry",
                    "change": "less likely"
                },
                {
                    "type": "openpi_entity",
                    "entity": "elastic hair tie",
                    "attribute": "wet with bleach",
                    "change": "more likely"
                },
                {
                    "type": "openpi_entity",
                    "entity": "elastic hair tie",
                    "attribute": "dry",
                    "change": "less likely"
                },
                {
                    "type": "openpi_entity",
                    "entity": "container",
                    "attribute": "emptier",
                    "change": "more likely"
                },
                {
                    "type": "openpi_entity",
                    "entity": "container",
                    "attribute": "full",
                    "change": "less likely"
                },
                {
                    "type": "openpi_entity",
                    "entity": "bucket",
                    "attribute": "wet with bleach",
                    "change": "more likely"
                },
                {
                    "type": "openpi_entity",
                    "entity": "bucket",
                    "attribute": "dry",
                    "change": "less likely"
                },
                {
                    "type": "openpi_entity",
                    "entity": "water",
                    "attribute": "whitish",
                    "change": "more likely"
                },
                {
                    "type": "openpi_entity",
                    "entity": "water",
                    "attribute": "clear",
                    "change": "less likely"
                },
                {
                    "type": "openpi_entity",
                    "entity": "bleach",
                    "attribute": "in the sink",
                    "change": "more likely"
                },
                {
                    "type": "openpi_entity",
                    "entity": "bleach",
                    "attribute": "in the bottle",
                    "change": "less likely"
                },
                {
                    "type": "openpi_entity",
                    "entity": "spray bottle",
                    "attribute": "full",
                    "change": "more likely"
                },
                {
                    "type": "openpi_entity",
                    "entity": "spray bottle",
                    "attribute": "empty",
                    "change": "less likely"
                },
                {
                    "type": "openpi_entity",
                    "entity": "water",
                    "attribute": "whitish",
                    "change": "more likely"
                },
                {
                    "type": "openpi_entity",
                    "entity": "water",
                    "attribute": "clear",
                    "change": "less likely"
                },
                {
                    "type": "openpi_entity",
                    "entity": "bottle",
                    "attribute": "light",
                    "change": "more likely"
                },
                {
                    "type": "openpi_entity",
                    "entity": "bottle",
                    "attribute": "heavy",
                    "change": "less likely"
                },
                {
                    "type": "openpi_entity",
                    "entity": "bleach",
                    "attribute": "inside bottle",
                    "change": "more likely"
                },
                {
                    "type": "openpi_entity",
                    "entity": "bleach",
                    "attribute": "outside of spray bottle",
                    "change": "less likely"
                }
            ],
            [
                {
                    "type": "step",
                    "step": "Organize your flowers and trim off leaves."
                },
                {
                    "type": "openpi_entity",
                    "entity": "vase",
                    "attribute": "clean",
                    "change": "more likely"
                },
                {
                    "type": "openpi_entity",
                    "entity": "vase",
                    "attribute": "dirty",
                    "change": "less likely"
                }
            ],
            [
                {
                    "type": "step",
                    "step": "Cut the flower stems with a sharp knife or garden clippers."
                },
                {
                    "type": "openpi_entity",
                    "entity": "flower",
                    "attribute": "cut",
                    "change": "more likely"
                },
                {
                    "type": "openpi_entity",
                    "entity": "flower",
                    "attribute": "whole",
                    "change": "less likely"
                }
            ],
            [
                {
                    "type": "step",
                    "step": "Insert the flowers into the vase"
                },
                {
                    "type": "entity",
                    "entity": "the flowers",
                    "attribute": "in the vase",
                    "change": "more likely"
                },
                {
                    "type": "multihop",
                    "event": "The flowers are wet.",
                    "change": "more likely"
                },
                {
                    "type": "openpi_entity",
                    "entity": "flower",
                    "attribute": "in vase",
                    "change": "more likely"
                },
                {
                    "type": "openpi_entity",
                    "entity": "flower",
                    "attribute": "on counter",
                    "change": "less likely"
                },
                {
                    "type": "openpi_entity",
                    "entity": "bowl",
                    "attribute": "empty",
                    "change": "more likely"
                },
                {
                    "type": "openpi_entity",
                    "entity": "bowl",
                    "attribute": "full",
                    "change": "less likely"
                },
                {
                    "type": "openpi_entity",
                    "entity": "vase",
                    "attribute": "full",
                    "change": "more likely"
                },
                {
                    "type": "openpi_entity",
                    "entity": "vase",
                    "attribute": "empty",
                    "change": "less likely"
                },
                {
                    "type": "openpi_entity",
                    "entity": "flower",
                    "attribute": "inside vase",
                    "change": "more likely"
                },
                {
                    "type": "openpi_entity",
                    "entity": "flower",
                    "attribute": "outside of vase",
                    "change": "less likely"
                }
            ]
        ]
    },
    "4": {
        "goal": "Wash sneakers",
        "annotator": "Harry",
        "steps": [
            [
                {
                    "type": "step",
                    "step": "Start."
                }
            ],
            [
                {
                    "type": "step",
                    "step": "Brush off dirt from the surface of the sneakers."
                },
                {
                    "type": "openpi_entity",
                    "entity": "dirt",
                    "attribute": "removed",
                    "change": "more likely"
                },
                {
                    "type": "openpi_entity",
                    "entity": "dirt",
                    "attribute": "present",
                    "change": "less likely"
                },
                {
                    "type": "openpi_entity",
                    "entity": "paintbrush",
                    "attribute": "dirty",
                    "change": "more likely"
                },
                {
                    "type": "openpi_entity",
                    "entity": "paintbrush",
                    "attribute": "clean",
                    "change": "less likely"
                },
                {
                    "type": "openpi_entity",
                    "entity": "air",
                    "attribute": "dusty",
                    "change": "more likely"
                },
                {
                    "type": "openpi_entity",
                    "entity": "air",
                    "attribute": "clear",
                    "change": "less likely"
                },
                {
                    "type": "openpi_entity",
                    "entity": "roller",
                    "attribute": "wet",
                    "change": "more likely"
                },
                {
                    "type": "openpi_entity",
                    "entity": "roller",
                    "attribute": "dry",
                    "change": "less likely"
                },
                {
                    "type": "openpi_entity",
                    "entity": "dirt",
                    "attribute": "brushed off",
                    "change": "more likely"
                },
                {
                    "type": "openpi_entity",
                    "entity": "dirt",
                    "attribute": "on surface",
                    "change": "less likely"
                },
                {
                    "type": "openpi_entity",
                    "entity": "dirt",
                    "attribute": "on rag",
                    "change": "more likely"
                },
                {
                    "type": "openpi_entity",
                    "entity": "dirt",
                    "attribute": "on surface",
                    "change": "less likely"
                },
                {
                    "type": "openpi_entity",
                    "entity": "the rag",
                    "attribute": "wet",
                    "change": "more likely"
                },
                {
                    "type": "openpi_entity",
                    "entity": "the rag",
                    "attribute": "dry",
                    "change": "less likely"
                },
                {
                    "type": "openpi_entity",
                    "entity": "dirt",
                    "attribute": "clear",
                    "change": "more likely"
                },
                {
                    "type": "openpi_entity",
                    "entity": "dirt",
                    "attribute": "obscured",
                    "change": "less likely"
                }
            ],
            [
                {
                    "type": "step",
                    "step": "Remove shoelaces."
                },
                {
                    "type": "entity",
                    "entity": "the shoelaces",
                    "attribute": "on the sneakers",
                    "change": "less likely"
                },
                {
                    "type": "entity",
                    "entity": "the sneakers",
                    "attribute": "wearable",
                    "change": "less likely"
                },
                {
                    "type": "multihop",
                    "event": "I put on the sneakers and go outside.",
                    "change": "less likely"
                },
                {
                    "type": "openpi_entity",
                    "entity": "shoe",
                    "attribute": "clean",
                    "change": "more likely"
                },
                {
                    "type": "openpi_entity",
                    "entity": "shoe",
                    "attribute": "dirty",
                    "change": "less likely"
                },
                {
                    "type": "openpi_entity",
                    "entity": "dirt",
                    "attribute": "on ground",
                    "change": "more likely"
                },
                {
                    "type": "openpi_entity",
                    "entity": "dirt",
                    "attribute": "on shoe",
                    "change": "less likely"
                }
            ],
            [
                {
                    "type": "step",
                    "step": "Rinse the shoelaces in soapy water and air dry."
                },
                {
                    "type": "openpi_entity",
                    "entity": "shoe",
                    "attribute": "rinsed",
                    "change": "more likely"
                },
                {
                    "type": "openpi_entity",
                    "entity": "shoe",
                    "attribute": "soapy",
                    "change": "less likely"
                },
                {
                    "type": "openpi_entity",
                    "entity": "shoe",
                    "attribute": "dry",
                    "change": "more likely"
                },
                {
                    "type": "openpi_entity",
                    "entity": "shoe",
                    "attribute": "wet",
                    "change": "less likely"
                },
                {
                    "type": "openpi_entity",
                    "entity": "soapy water",
                    "attribute": "on the feet",
                    "change": "more likely"
                },
                {
                    "type": "openpi_entity",
                    "entity": "soapy water",
                    "attribute": "in the bucket",
                    "change": "less likely"
                },
                {
                    "type": "openpi_entity",
                    "entity": "soapy water",
                    "attribute": "on the shoes",
                    "change": "more likely"
                },
                {
                    "type": "openpi_entity",
                    "entity": "soapy water",
                    "attribute": "in the faucet",
                    "change": "less likely"
                },
                {
                    "type": "openpi_entity",
                    "entity": "soap",
                    "attribute": "in water",
                    "change": "more likely"
                },
                {
                    "type": "openpi_entity",
                    "entity": "soap",
                    "attribute": "in bottle",
                    "change": "less likely"
                },
                {
                    "type": "openpi_entity",
                    "entity": "soapy water",
                    "attribute": "in a bucket",
                    "change": "more likely"
                },
                {
                    "type": "openpi_entity",
                    "entity": "soapy water",
                    "attribute": "in the faucet",
                    "change": "less likely"
                },
                {
                    "type": "openpi_entity",
                    "entity": "soapy water",
                    "attribute": "in a water container",
                    "change": "more likely"
                },
                {
                    "type": "openpi_entity",
                    "entity": "soapy water",
                    "attribute": "in a bottle",
                    "change": "less likely"
                },
                {
                    "type": "openpi_entity",
                    "entity": "soap",
                    "attribute": "on the feet",
                    "change": "more likely"
                },
                {
                    "type": "openpi_entity",
                    "entity": "soap",
                    "attribute": "in the bottle",
                    "change": "less likely"
                }
            ],
            [
                {
                    "type": "step",
                    "step": "Apply mild detergent to the sneakers and rub gently."
                },
                {
                    "type": "entity",
                    "entity": "the sneakers",
                    "attribute": "wet",
                    "change": "more likely"
                },
                {
                    "type": "multihop",
                    "event": "The sneakers are damp.",
                    "change": "more likely"
                },
                {
                    "type": "openpi_entity",
                    "entity": "detergent",
                    "attribute": "on shoes",
                    "change": "more likely"
                },
                {
                    "type": "openpi_entity",
                    "entity": "detergent",
                    "attribute": "in bottle",
                    "change": "less likely"
                },
                {
                    "type": "openpi_entity",
                    "entity": "bottle",
                    "attribute": "less full",
                    "change": "more likely"
                },
                {
                    "type": "openpi_entity",
                    "entity": "bottle",
                    "attribute": "more full",
                    "change": "less likely"
                },
                {
                    "type": "openpi_entity",
                    "entity": "water",
                    "attribute": "soapy smelling",
                    "change": "more likely"
                },
                {
                    "type": "openpi_entity",
                    "entity": "water",
                    "attribute": "soapy",
                    "change": "less likely"
                },
                {
                    "type": "openpi_entity",
                    "entity": "detergent",
                    "attribute": "on the feet",
                    "change": "more likely"
                },
                {
                    "type": "openpi_entity",
                    "entity": "detergent",
                    "attribute": "in a bottle",
                    "change": "less likely"
                }
            ],
            [
                {
                    "type": "step",
                    "step": "Use a wet towel to blot the sneakers. "
                },
                {
                    "type": "openpi_entity",
                    "entity": "sweat",
                    "attribute": "gone",
                    "change": "more likely"
                },
                {
                    "type": "openpi_entity",
                    "entity": "sweat",
                    "attribute": "on the sneakers",
                    "change": "less likely"
                },
                {
                    "type": "openpi_entity",
                    "entity": "towel",
                    "attribute": "wet",
                    "change": "more likely"
                },
                {
                    "type": "openpi_entity",
                    "entity": "towel",
                    "attribute": "dry",
                    "change": "less likely"
                },
                {
                    "type": "openpi_entity",
                    "entity": "detergent",
                    "attribute": "on sneakers",
                    "change": "more likely"
                },
                {
                    "type": "openpi_entity",
                    "entity": "detergent",
                    "attribute": "in bottle",
                    "change": "less likely"
                },
                {
                    "type": "openpi_entity",
                    "entity": "sock",
                    "attribute": "wet",
                    "change": "more likely"
                },
                {
                    "type": "openpi_entity",
                    "entity": "sock",
                    "attribute": "dry",
                    "change": "less likely"
                },
                {
                    "type": "openpi_entity",
                    "entity": "water",
                    "attribute": "on the towel",
                    "change": "more likely"
                },
                {
                    "type": "openpi_entity",
                    "entity": "water",
                    "attribute": "on the sweat covered sneakers",
                    "change": "less likely"
                },
                {
                    "type": "openpi_entity",
                    "entity": "shoe",
                    "attribute": "clean",
                    "change": "more likely"
                },
                {
                    "type": "openpi_entity",
                    "entity": "shoe",
                    "attribute": "dirty",
                    "change": "less likely"
                }
            ],
            [
                {
                    "type": "step",
                    "step": "Air dry the sneakers."
                },
                {
                    "type": "entity",
                    "entity": "the sneakers",
                    "attribute": "wet",
                    "change": "less likely"
                },
                {
                    "type": "multihop",
                    "event": "The sneakers are damp.",
                    "change": "less likely"
                },
                {
                    "type": "openpi_entity",
                    "entity": "surface",
                    "attribute": "dry",
                    "change": "more likely"
                },
                {
                    "type": "openpi_entity",
                    "entity": "surface",
                    "attribute": "wet",
                    "change": "less likely"
                },
                {
                    "type": "openpi_entity",
                    "entity": "shoe",
                    "attribute": "dry",
                    "change": "more likely"
                },
                {
                    "type": "openpi_entity",
                    "entity": "shoe",
                    "attribute": "wet",
                    "change": "less likely"
                }
            ],
            [
                {
                    "type": "step",
                    "step": "Put the shoelaces back to the sneakers."
                },
                {
                    "type": "entity",
                    "entity": "the shoelaces",
                    "attribute": "on the sneakers",
                    "change": "more likely"
                },
                {
                    "type": "entity",
                    "entity": "the sneakers",
                    "attribute": "wearable",
                    "change": "more likely"
                },
                {
                    "type": "multihop",
                    "event": "I put on the sneakers and go outside.",
                    "change": "more likely"
                }
            ]
        ]
    },
    "5": {
        "goal": "Steam broccoli",
        "annotator": "Harry",
        "steps": [
            [
                {
                    "type": "step",
                    "step": "Start."
                }
            ],
            [
                {
                    "type": "step",
                    "step": "Clean the broccoli."
                },
                {
                    "type": "openpi_entity",
                    "entity": "broccoli",
                    "attribute": "clean",
                    "change": "more likely"
                },
                {
                    "type": "openpi_entity",
                    "entity": "broccoli",
                    "attribute": "messy",
                    "change": "less likely"
                },
                {
                    "type": "openpi_entity",
                    "entity": "the broccoli",
                    "attribute": "pricked",
                    "change": "more likely"
                },
                {
                    "type": "openpi_entity",
                    "entity": "the broccoli",
                    "attribute": "unsprayed",
                    "change": "less likely"
                },
                {
                    "type": "openpi_entity",
                    "entity": "broccoli",
                    "attribute": "cleaner",
                    "change": "more likely"
                },
                {
                    "type": "openpi_entity",
                    "entity": "broccoli",
                    "attribute": "dirty",
                    "change": "less likely"
                },
                {
                    "type": "openpi_entity",
                    "entity": "broccoli",
                    "attribute": "wet",
                    "change": "more likely"
                },
                {
                    "type": "openpi_entity",
                    "entity": "broccoli",
                    "attribute": "dry",
                    "change": "less likely"
                },
                {
                    "type": "openpi_entity",
                    "entity": "broccoli",
                    "attribute": "clean",
                    "change": "more likely"
                },
                {
                    "type": "openpi_entity",
                    "entity": "broccoli",
                    "attribute": "dirty",
                    "change": "less likely"
                }
            ],
            [
                {
                    "type": "step",
                    "step": "Trim the stem and cut the florets."
                },
                {
                    "type": "openpi_entity",
                    "entity": "stem",
                    "attribute": "shorter",
                    "change": "more likely"
                },
                {
                    "type": "openpi_entity",
                    "entity": "stem",
                    "attribute": "longer",
                    "change": "less likely"
                },
                {
                    "type": "openpi_entity",
                    "entity": "broccoli",
                    "attribute": "cut",
                    "change": "more likely"
                },
                {
                    "type": "openpi_entity",
                    "entity": "broccoli",
                    "attribute": "whole",
                    "change": "less likely"
                },
                {
                    "type": "openpi_entity",
                    "entity": "stem",
                    "attribute": "cut",
                    "change": "more likely"
                },
                {
                    "type": "openpi_entity",
                    "entity": "stem",
                    "attribute": "attached",
                    "change": "less likely"
                }
            ],
            [
                {
                    "type": "step",
                    "step": "Place a steamer basket in a saucepan."
                },
                {
                    "type": "openpi_entity",
                    "entity": "saucepan",
                    "attribute": "heavier",
                    "change": "more likely"
                },
                {
                    "type": "openpi_entity",
                    "entity": "saucepan",
                    "attribute": "light",
                    "change": "less likely"
                },
                {
                    "type": "openpi_entity",
                    "entity": "broccoli",
                    "attribute": "stimulated",
                    "change": "more likely"
                },
                {
                    "type": "openpi_entity",
                    "entity": "broccoli",
                    "attribute": "unstimulated",
                    "change": "less likely"
                },
                {
                    "type": "openpi_entity",
                    "entity": "pan",
                    "attribute": "heavy",
                    "change": "more likely"
                },
                {
                    "type": "openpi_entity",
                    "entity": "pan",
                    "attribute": "light",
                    "change": "less likely"
                },
                {
                    "type": "openpi_entity",
                    "entity": "saucepan",
                    "attribute": "full",
                    "change": "more likely"
                },
                {
                    "type": "openpi_entity",
                    "entity": "saucepan",
                    "attribute": "empty",
                    "change": "less likely"
                },
                {
                    "type": "openpi_entity",
                    "entity": "broccoli",
                    "attribute": "clean",
                    "change": "more likely"
                },
                {
                    "type": "openpi_entity",
                    "entity": "broccoli",
                    "attribute": "dirty",
                    "change": "less likely"
                },
                {
                    "type": "openpi_entity",
                    "entity": "broccoli",
                    "attribute": "inside saucepan",
                    "change": "more likely"
                },
                {
                    "type": "openpi_entity",
                    "entity": "broccoli",
                    "attribute": "outside of saucepan",
                    "change": "less likely"
                },
                {
                    "type": "openpi_entity",
                    "entity": "broccoli",
                    "attribute": "in pan",
                    "change": "more likely"
                },
                {
                    "type": "openpi_entity",
                    "entity": "broccoli",
                    "attribute": "on counter",
                    "change": "less likely"
                },
                {
                    "type": "openpi_entity",
                    "entity": "broccoli",
                    "attribute": "heated",
                    "change": "more likely"
                },
                {
                    "type": "openpi_entity",
                    "entity": "broccoli",
                    "attribute": "room temperature",
                    "change": "less likely"
                },
                {
                    "type": "openpi_entity",
                    "entity": "broccoli basket",
                    "attribute": "heavier",
                    "change": "more likely"
                },
                {
                    "type": "openpi_entity",
                    "entity": "broccoli basket",
                    "attribute": "lighter",
                    "change": "less likely"
                },
                {
                    "type": "openpi_entity",
                    "entity": "broccoli",
                    "attribute": "hot",
                    "change": "more likely"
                },
                {
                    "type": "openpi_entity",
                    "entity": "broccoli",
                    "attribute": "cool",
                    "change": "less likely"
                }
            ],
            [
                {
                    "type": "step",
                    "step": "Place the broccoli in the steamer basket."
                },
                {
                    "type": "openpi_entity",
                    "entity": "saucepan",
                    "attribute": "fuller",
                    "change": "more likely"
                },
                {
                    "type": "openpi_entity",
                    "entity": "saucepan",
                    "attribute": "emptier",
                    "change": "less likely"
                },
                {
                    "type": "openpi_entity",
                    "entity": "broccoli",
                    "attribute": "in container",
                    "change": "more likely"
                },
                {
                    "type": "openpi_entity",
                    "entity": "broccoli",
                    "attribute": "outside of container",
                    "change": "less likely"
                },
                {
                    "type": "openpi_entity",
                    "entity": "broccoli",
                    "attribute": "lighter",
                    "change": "more likely"
                },
                {
                    "type": "openpi_entity",
                    "entity": "broccoli",
                    "attribute": "heavier",
                    "change": "less likely"
                },
                {
                    "type": "openpi_entity",
                    "entity": "broccoli",
                    "attribute": "lighter",
                    "change": "more likely"
                },
                {
                    "type": "openpi_entity",
                    "entity": "broccoli",
                    "attribute": "heavier",
                    "change": "less likely"
                },
                {
                    "type": "openpi_entity",
                    "entity": "the basket",
                    "attribute": "heavier",
                    "change": "more likely"
                },
                {
                    "type": "openpi_entity",
                    "entity": "the basket",
                    "attribute": "lighter",
                    "change": "less likely"
                }
            ],
            [
                {
                    "type": "step",
                    "step": "Steam the broccoli."
                },
                {
                    "type": "entity",
                    "entity": "the broccoli",
                    "attribute": "cooked",
                    "change": "more likely"
                },
                {
                    "type": "entity",
                    "entity": "the broccoli",
                    "attribute": "hot",
                    "change": "more likely"
                },
                {
                    "type": "multihop",
                    "event": "I eat the broccoli and my mouth burns.",
                    "change": "more likely"
                },
                {
                    "type": "openpi_entity",
                    "entity": "broccoli",
                    "attribute": "hot",
                    "change": "more likely"
                },
                {
                    "type": "openpi_entity",
                    "entity": "broccoli",
                    "attribute": "cold",
                    "change": "less likely"
                },
                {
                    "type": "openpi_entity",
                    "entity": "stove",
                    "attribute": "on",
                    "change": "more likely"
                },
                {
                    "type": "openpi_entity",
                    "entity": "stove",
                    "attribute": "off",
                    "change": "less likely"
                },
                {
                    "type": "openpi_entity",
                    "entity": "broccoli",
                    "attribute": "hot",
                    "change": "more likely"
                },
                {
                    "type": "openpi_entity",
                    "entity": "broccoli",
                    "attribute": "cold",
                    "change": "less likely"
                },
                {
                    "type": "openpi_entity",
                    "entity": "broccoli",
                    "attribute": "hot",
                    "change": "more likely"
                },
                {
                    "type": "openpi_entity",
                    "entity": "broccoli",
                    "attribute": "cool",
                    "change": "less likely"
                },
                {
                    "type": "openpi_entity",
                    "entity": "broccoli",
                    "attribute": "in the steamer basket",
                    "change": "more likely"
                },
                {
                    "type": "openpi_entity",
                    "entity": "broccoli",
                    "attribute": "on the counter",
                    "change": "less likely"
                },
                {
                    "type": "openpi_entity",
                    "entity": "broccoli",
                    "attribute": "soft",
                    "change": "more likely"
                },
                {
                    "type": "openpi_entity",
                    "entity": "broccoli",
                    "attribute": "hard",
                    "change": "less likely"
                },
                {
                    "type": "openpi_entity",
                    "entity": "broccoli",
                    "attribute": "steamy",
                    "change": "more likely"
                },
                {
                    "type": "openpi_entity",
                    "entity": "broccoli",
                    "attribute": "room temperature",
                    "change": "less likely"
                },
                {
                    "type": "openpi_entity",
                    "entity": "broccoli",
                    "attribute": "hot",
                    "change": "more likely"
                },
                {
                    "type": "openpi_entity",
                    "entity": "broccoli",
                    "attribute": "cool",
                    "change": "less likely"
                }
            ],
            [
                {
                    "type": "step",
                    "step": "Remove it from heat."
                },
                {
                    "type": "openpi_entity",
                    "entity": "broccoli",
                    "attribute": "cooler",
                    "change": "more likely"
                },
                {
                    "type": "openpi_entity",
                    "entity": "broccoli",
                    "attribute": "hot",
                    "change": "less likely"
                },
                {
                    "type": "openpi_entity",
                    "entity": "broccoli",
                    "attribute": "cooler",
                    "change": "more likely"
                },
                {
                    "type": "openpi_entity",
                    "entity": "broccoli",
                    "attribute": "hotter",
                    "change": "less likely"
                },
                {
                    "type": "openpi_entity",
                    "entity": "broccoli",
                    "attribute": "cooler",
                    "change": "more likely"
                },
                {
                    "type": "openpi_entity",
                    "entity": "broccoli",
                    "attribute": "hotter",
                    "change": "less likely"
                }
            ],
            [
                {
                    "type": "step",
                    "step": "Serve."
                },
                {
                    "type": "openpi_entity",
                    "entity": "broccoli",
                    "attribute": "in the cupboard",
                    "change": "more likely"
                },
                {
                    "type": "openpi_entity",
                    "entity": "broccoli",
                    "attribute": "on the counter",
                    "change": "less likely"
                }
            ]
        ]
    },
    "6": {
        "goal": "Order food delivery with an app",
        "annotator": "Harry",
        "steps": [
            [
                {
                    "type": "step",
                    "step": "Start."
                }
            ],
            [
                {
                    "type": "step",
                    "step": "Choose a restaurant."
                },
                {
                    "type": "openpi_entity",
                    "entity": "money",
                    "attribute": "in cash register",
                    "change": "more likely"
                },
                {
                    "type": "openpi_entity",
                    "entity": "money",
                    "attribute": "in wallet",
                    "change": "less likely"
                },
                {
                    "type": "openpi_entity",
                    "entity": "food",
                    "attribute": "in your home",
                    "change": "more likely"
                },
                {
                    "type": "openpi_entity",
                    "entity": "food",
                    "attribute": "in store",
                    "change": "less likely"
                },
                {
                    "type": "openpi_entity",
                    "entity": "location",
                    "attribute": "chosen",
                    "change": "more likely"
                },
                {
                    "type": "openpi_entity",
                    "entity": "location",
                    "attribute": "unchosen",
                    "change": "less likely"
                }
            ],
            [
                {
                    "type": "step",
                    "step": "Add the dishes that you want to order to the shopping cart."
                },
                {
                    "type": "openpi_entity",
                    "entity": "cart",
                    "attribute": "heavier",
                    "change": "more likely"
                },
                {
                    "type": "openpi_entity",
                    "entity": "cart",
                    "attribute": "lighter",
                    "change": "less likely"
                },
                {
                    "type": "openpi_entity",
                    "entity": "chicken",
                    "attribute": "on the counter",
                    "change": "more likely"
                },
                {
                    "type": "openpi_entity",
                    "entity": "chicken",
                    "attribute": "on the grill",
                    "change": "less likely"
                },
                {
                    "type": "openpi_entity",
                    "entity": "cart",
                    "attribute": "full",
                    "change": "more likely"
                },
                {
                    "type": "openpi_entity",
                    "entity": "cart",
                    "attribute": "empty",
                    "change": "less likely"
                },
                {
                    "type": "openpi_entity",
                    "entity": "shopping cart",
                    "attribute": "full",
                    "change": "more likely"
                },
                {
                    "type": "openpi_entity",
                    "entity": "shopping cart",
                    "attribute": "empty",
                    "change": "less likely"
                }
            ],
            [
                {
                    "type": "step",
                    "step": "Verify your delivery address and instructions."
                },
                {
                    "type": "openpi_entity",
                    "entity": "address",
                    "attribute": "known",
                    "change": "more likely"
                },
                {
                    "type": "openpi_entity",
                    "entity": "address",
                    "attribute": "unknown",
                    "change": "less likely"
                },
                {
                    "type": "openpi_entity",
                    "entity": "package",
                    "attribute": "opened",
                    "change": "more likely"
                },
                {
                    "type": "openpi_entity",
                    "entity": "package",
                    "attribute": "unopened",
                    "change": "less likely"
                },
                {
                    "type": "openpi_entity",
                    "entity": "package",
                    "attribute": "in the shopping cart",
                    "change": "more likely"
                },
                {
                    "type": "openpi_entity",
                    "entity": "package",
                    "attribute": "on the table",
                    "change": "less likely"
                },
                {
                    "type": "openpi_entity",
                    "entity": "package",
                    "attribute": "at the house",
                    "change": "more likely"
                },
                {
                    "type": "openpi_entity",
                    "entity": "package",
                    "attribute": "at the store",
                    "change": "less likely"
                }
            ],
            [
                {
                    "type": "step",
                    "step": "Pay."
                },
                {
                    "type": "entity",
                    "entity": "the order",
                    "attribute": "placed",
                    "change": "more likely"
                },
                {
                    "type": "multihop",
                    "event": "The restaurant knows what food to prepare for me.",
                    "change": "more likely"
                },
                {
                    "type": "openpi_entity",
                    "entity": "cash",
                    "attribute": "at shop",
                    "change": "more likely"
                },
                {
                    "type": "openpi_entity",
                    "entity": "cash",
                    "attribute": "in wallet",
                    "change": "less likely"
                },
                {
                    "type": "openpi_entity",
                    "entity": "money",
                    "attribute": "at shop",
                    "change": "more likely"
                },
                {
                    "type": "openpi_entity",
                    "entity": "money",
                    "attribute": "in purse",
                    "change": "less likely"
                },
                {
                    "type": "openpi_entity",
                    "entity": "money",
                    "attribute": "at shop",
                    "change": "more likely"
                },
                {
                    "type": "openpi_entity",
                    "entity": "money",
                    "attribute": "in wallet",
                    "change": "less likely"
                },
                {
                    "type": "openpi_entity",
                    "entity": "account",
                    "attribute": "fuller",
                    "change": "more likely"
                },
                {
                    "type": "openpi_entity",
                    "entity": "account",
                    "attribute": "emptier",
                    "change": "less likely"
                },
                {
                    "type": "openpi_entity",
                    "entity": "wallet",
                    "attribute": "full",
                    "change": "more likely"
                },
                {
                    "type": "openpi_entity",
                    "entity": "wallet",
                    "attribute": "empty",
                    "change": "less likely"
                },
                {
                    "type": "openpi_entity",
                    "entity": "shopping cart",
                    "attribute": "heavier",
                    "change": "more likely"
                },
                {
                    "type": "openpi_entity",
                    "entity": "shopping cart",
                    "attribute": "lighter",
                    "change": "less likely"
                }
            ],
            [
                {
                    "type": "step",
                    "step": "Track delivery status and call the driver if needed."
                },
                {
                    "type": "openpi_entity",
                    "entity": "money",
                    "attribute": "at the cashier",
                    "change": "more likely"
                },
                {
                    "type": "openpi_entity",
                    "entity": "money",
                    "attribute": "in purse",
                    "change": "less likely"
                },
                {
                    "type": "openpi_entity",
                    "entity": "cashier's pocket",
                    "attribute": "filled with cash",
                    "change": "more likely"
                },
                {
                    "type": "openpi_entity",
                    "entity": "cashier's pocket",
                    "attribute": "empty",
                    "change": "less likely"
                },
                {
                    "type": "openpi_entity",
                    "entity": "driver",
                    "attribute": "at the store",
                    "change": "more likely"
                },
                {
                    "type": "openpi_entity",
                    "entity": "driver",
                    "attribute": "at home",
                    "change": "less likely"
                },
                {
                    "type": "openpi_entity",
                    "entity": "call",
                    "attribute": "made",
                    "change": "more likely"
                },
                {
                    "type": "openpi_entity",
                    "entity": "call",
                    "attribute": "unmade",
                    "change": "less likely"
                },
                {
                    "type": "openpi_entity",
                    "entity": "phone",
                    "attribute": "turned on",
                    "change": "more likely"
                },
                {
                    "type": "openpi_entity",
                    "entity": "phone",
                    "attribute": "turned off",
                    "change": "less likely"
                }
            ],
            [
                {
                    "type": "step",
                    "step": "Pick up the food and enjoy. "
                },
                {
                    "type": "entity",
                    "entity": "the food",
                    "attribute": "received",
                    "change": "more likely"
                },
                {
                    "type": "multihop",
                    "event": "I start eating the food I ordered.",
                    "change": "more likely"
                },
                {
                    "type": "openpi_entity",
                    "entity": "bag",
                    "attribute": "light",
                    "change": "more likely"
                },
                {
                    "type": "openpi_entity",
                    "entity": "bag",
                    "attribute": "heavy",
                    "change": "less likely"
                },
                {
                    "type": "openpi_entity",
                    "entity": "plate",
                    "attribute": "picked up",
                    "change": "more likely"
                },
                {
                    "type": "openpi_entity",
                    "entity": "plate",
                    "attribute": "empty",
                    "change": "less likely"
                },
                {
                    "type": "openpi_entity",
                    "entity": "plate",
                    "attribute": "on table",
                    "change": "more likely"
                },
                {
                    "type": "openpi_entity",
                    "entity": "plate",
                    "attribute": "in box",
                    "change": "less likely"
                },
                {
                    "type": "openpi_entity",
                    "entity": "stomach",
                    "attribute": "more full",
                    "change": "more likely"
                },
                {
                    "type": "openpi_entity",
                    "entity": "stomach",
                    "attribute": "less full",
                    "change": "less likely"
                },
                {
                    "type": "openpi_entity",
                    "entity": "cart",
                    "attribute": "dirty",
                    "change": "more likely"
                },
                {
                    "type": "openpi_entity",
                    "entity": "cart",
                    "attribute": "clean",
                    "change": "less likely"
                },
                {
                    "type": "openpi_entity",
                    "entity": "cart",
                    "attribute": "full",
                    "change": "more likely"
                },
                {
                    "type": "openpi_entity",
                    "entity": "cart",
                    "attribute": "empty",
                    "change": "less likely"
                },
                {
                    "type": "openpi_entity",
                    "entity": "cart",
                    "attribute": "full",
                    "change": "more likely"
                },
                {
                    "type": "openpi_entity",
                    "entity": "cart",
                    "attribute": "empty",
                    "change": "less likely"
                },
                {
                    "type": "openpi_entity",
                    "entity": "food",
                    "attribute": "in the cart",
                    "change": "more likely"
                },
                {
                    "type": "openpi_entity",
                    "entity": "food",
                    "attribute": "on the table",
                    "change": "less likely"
                }
            ]
        ]
    },
    "7": {
        "goal": "Take domestic flights",
        "annotator": "Harry",
        "steps": [
            [
                {
                    "type": "step",
                    "step": "Start."
                }
            ],
            [
                {
                    "type": "step",
                    "step": "Book a flight."
                },
                {
                    "type": "entity",
                    "entity": "your ticket",
                    "attribute": "purchased",
                    "change": "more likely"
                },
                {
                    "type": "multihop",
                    "event": "I have a ticket number for the flight.",
                    "change": "more likely"
                },
                {
                    "type": "openpi_entity",
                    "entity": "airline",
                    "attribute": "in airport",
                    "change": "more likely"
                },
                {
                    "type": "openpi_entity",
                    "entity": "airline",
                    "attribute": "away",
                    "change": "less likely"
                },
                {
                    "type": "openpi_entity",
                    "entity": "book",
                    "attribute": "on the table",
                    "change": "more likely"
                },
                {
                    "type": "openpi_entity",
                    "entity": "book",
                    "attribute": "in the bag",
                    "change": "less likely"
                },
                {
                    "type": "openpi_entity",
                    "entity": "airline ticket",
                    "attribute": "purchased from store",
                    "change": "more likely"
                },
                {
                    "type": "openpi_entity",
                    "entity": "airline ticket",
                    "attribute": "on sale in store",
                    "change": "less likely"
                }
            ],
            [
                {
                    "type": "step",
                    "step": "Arrive at the airport at least 1 hour prior to boarding."
                },
                {
                    "type": "entity",
                    "entity": "I",
                    "attribute": "at the airport",
                    "change": "more likely"
                },
                {
                    "type": "multihop",
                    "event": "I pack another shirt into my suitcase.",
                    "change": "less likely"
                },
                {
                    "type": "openpi_entity",
                    "entity": "luggage",
                    "attribute": "in luggage",
                    "change": "more likely"
                },
                {
                    "type": "openpi_entity",
                    "entity": "luggage",
                    "attribute": "on table",
                    "change": "less likely"
                },
                {
                    "type": "openpi_entity",
                    "entity": "departure",
                    "attribute": "afternoon",
                    "change": "more likely"
                },
                {
                    "type": "openpi_entity",
                    "entity": "departure",
                    "attribute": "evening",
                    "change": "less likely"
                },
                {
                    "type": "openpi_entity",
                    "entity": "time",
                    "attribute": "later",
                    "change": "more likely"
                },
                {
                    "type": "openpi_entity",
                    "entity": "time",
                    "attribute": "earlier",
                    "change": "less likely"
                },
                {
                    "type": "openpi_entity",
                    "entity": "door",
                    "attribute": "open",
                    "change": "more likely"
                },
                {
                    "type": "openpi_entity",
                    "entity": "door",
                    "attribute": "closed",
                    "change": "less likely"
                },
                {
                    "type": "openpi_entity",
                    "entity": "arrival",
                    "attribute": "at airport",
                    "change": "more likely"
                },
                {
                    "type": "openpi_entity",
                    "entity": "arrival",
                    "attribute": "in person",
                    "change": "less likely"
                },
                {
                    "type": "openpi_entity",
                    "entity": "departure",
                    "attribute": "early morning",
                    "change": "more likely"
                },
                {
                    "type": "openpi_entity",
                    "entity": "departure",
                    "attribute": "evening",
                    "change": "less likely"
                }
            ],
            [
                {
                    "type": "step",
                    "step": "Check in using the airline app or at the counter."
                },
                {
                    "type": "multihop",
                    "event": "I have my boarding pass ready.",
                    "change": "more likely"
                },
                {
                    "type": "openpi_entity",
                    "entity": "airport screening",
                    "attribute": "tested",
                    "change": "more likely"
                },
                {
                    "type": "openpi_entity",
                    "entity": "airport screening",
                    "attribute": "untested",
                    "change": "less likely"
                },
                {
                    "type": "openpi_entity",
                    "entity": "hand",
                    "attribute": "moving back and forth",
                    "change": "more likely"
                },
                {
                    "type": "openpi_entity",
                    "entity": "hand",
                    "attribute": "still",
                    "change": "less likely"
                },
                {
                    "type": "openpi_entity",
                    "entity": "airline account",
                    "attribute": "opened",
                    "change": "more likely"
                },
                {
                    "type": "openpi_entity",
                    "entity": "airline account",
                    "attribute": "closed",
                    "change": "less likely"
                },
                {
                    "type": "openpi_entity",
                    "entity": "napkin",
                    "attribute": "owned by the shopper",
                    "change": "more likely"
                },
                {
                    "type": "openpi_entity",
                    "entity": "napkin",
                    "attribute": "owned by the store",
                    "change": "less likely"
                },
                {
                    "type": "openpi_entity",
                    "entity": "ink",
                    "attribute": "on paper",
                    "change": "more likely"
                },
                {
                    "type": "openpi_entity",
                    "entity": "ink",
                    "attribute": "in pen",
                    "change": "less likely"
                },
                {
                    "type": "openpi_entity",
                    "entity": "paper",
                    "attribute": "holding a blank page",
                    "change": "more likely"
                },
                {
                    "type": "openpi_entity",
                    "entity": "paper",
                    "attribute": "blank",
                    "change": "less likely"
                },
                {
                    "type": "openpi_entity",
                    "entity": "traveler",
                    "attribute": "at the airport",
                    "change": "more likely"
                },
                {
                    "type": "openpi_entity",
                    "entity": "traveler",
                    "attribute": "at home",
                    "change": "less likely"
                }
            ],
            [
                {
                    "type": "step",
                    "step": "Check bags if any."
                },
                {
                    "type": "openpi_entity",
                    "entity": "bags",
                    "attribute": "checked",
                    "change": "more likely"
                },
                {
                    "type": "openpi_entity",
                    "entity": "bags",
                    "attribute": "opened",
                    "change": "less likely"
                },
                {
                    "type": "openpi_entity",
                    "entity": "bag",
                    "attribute": "in the hand",
                    "change": "more likely"
                },
                {
                    "type": "openpi_entity",
                    "entity": "bag",
                    "attribute": "in the checked bag",
                    "change": "less likely"
                },
                {
                    "type": "openpi_entity",
                    "entity": "luggage",
                    "attribute": "closed",
                    "change": "more likely"
                },
                {
                    "type": "openpi_entity",
                    "entity": "luggage",
                    "attribute": "opened",
                    "change": "less likely"
                },
                {
                    "type": "openpi_entity",
                    "entity": "bags",
                    "attribute": "checked",
                    "change": "more likely"
                },
                {
                    "type": "openpi_entity",
                    "entity": "bags",
                    "attribute": "unchecked",
                    "change": "less likely"
                }
            ],
            [
                {
                    "type": "step",
                    "step": "Go through airport security."
                },
                {
                    "type": "openpi_entity",
                    "entity": "bag",
                    "attribute": "closed",
                    "change": "more likely"
                },
                {
                    "type": "openpi_entity",
                    "entity": "bag",
                    "attribute": "opened",
                    "change": "less likely"
                },
                {
                    "type": "openpi_entity",
                    "entity": "airport security",
                    "attribute": "complete",
                    "change": "more likely"
                },
                {
                    "type": "openpi_entity",
                    "entity": "airport security",
                    "attribute": "incomplete",
                    "change": "less likely"
                },
                {
                    "type": "openpi_entity",
                    "entity": "security",
                    "attribute": "found",
                    "change": "more likely"
                },
                {
                    "type": "openpi_entity",
                    "entity": "security",
                    "attribute": "unfound",
                    "change": "less likely"
                }
            ],
            [
                {
                    "type": "step",
                    "step": "Wait at the boarding gate or walk around in the terminal."
                },
                {
                    "type": "openpi_entity",
                    "entity": "screen",
                    "attribute": "white",
                    "change": "more likely"
                },
                {
                    "type": "openpi_entity",
                    "entity": "screen",
                    "attribute": "black",
                    "change": "less likely"
                },
                {
                    "type": "openpi_entity",
                    "entity": "person",
                    "attribute": "walking",
                    "change": "more likely"
                },
                {
                    "type": "openpi_entity",
                    "entity": "person",
                    "attribute": "stationary",
                    "change": "less likely"
                },
                {
                    "type": "openpi_entity",
                    "entity": "bag",
                    "attribute": "held in hands",
                    "change": "more likely"
                },
                {
                    "type": "openpi_entity",
                    "entity": "bag",
                    "attribute": "on the table",
                    "change": "less likely"
                },
                {
                    "type": "openpi_entity",
                    "entity": "yellow",
                    "attribute": "green",
                    "change": "more likely"
                },
                {
                    "type": "openpi_entity",
                    "entity": "yellow",
                    "attribute": "visible",
                    "change": "less likely"
                }
            ],
            [
                {
                    "type": "step",
                    "step": "Board the plane when your group is called."
                },
                {
                    "type": "openpi_entity",
                    "entity": "bag",
                    "attribute": "light",
                    "change": "more likely"
                },
                {
                    "type": "openpi_entity",
                    "entity": "bag",
                    "attribute": "heavy",
                    "change": "less likely"
                },
                {
                    "type": "openpi_entity",
                    "entity": "passenger",
                    "attribute": "outside",
                    "change": "more likely"
                },
                {
                    "type": "openpi_entity",
                    "entity": "passenger",
                    "attribute": "inside",
                    "change": "less likely"
                },
                {
                    "type": "openpi_entity",
                    "entity": "plane",
                    "attribute": "owned by the passenger",
                    "change": "more likely"
                },
                {
                    "type": "openpi_entity",
                    "entity": "plane",
                    "attribute": "owned by the airline",
                    "change": "less likely"
                },
                {
                    "type": "openpi_entity",
                    "entity": "person",
                    "attribute": "pushing doorbell",
                    "change": "more likely"
                },
                {
                    "type": "openpi_entity",
                    "entity": "person",
                    "attribute": "pushing doorbell",
                    "change": "less likely"
                },
                {
                    "type": "openpi_entity",
                    "entity": "door",
                    "attribute": "open",
                    "change": "more likely"
                },
                {
                    "type": "openpi_entity",
                    "entity": "door",
                    "attribute": "shut",
                    "change": "less likely"
                },
                {
                    "type": "openpi_entity",
                    "entity": "airport",
                    "attribute": "occupied",
                    "change": "more likely"
                },
                {
                    "type": "openpi_entity",
                    "entity": "airport",
                    "attribute": "unoccupied",
                    "change": "less likely"
                },
                {
                    "type": "openpi_entity",
                    "entity": "passenger",
                    "attribute": "moving",
                    "change": "more likely"
                },
                {
                    "type": "openpi_entity",
                    "entity": "passenger",
                    "attribute": "still",
                    "change": "less likely"
                },
                {
                    "type": "openpi_entity",
                    "entity": "plane",
                    "attribute": "empty",
                    "change": "more likely"
                },
                {
                    "type": "openpi_entity",
                    "entity": "plane",
                    "attribute": "occupied",
                    "change": "less likely"
                },
                {
                    "type": "openpi_entity",
                    "entity": "plane",
                    "attribute": "noisy with people outside",
                    "change": "more likely"
                },
                {
                    "type": "openpi_entity",
                    "entity": "plane",
                    "attribute": "quiet",
                    "change": "less likely"
                },
                {
                    "type": "openpi_entity",
                    "entity": "gate",
                    "attribute": "loud",
                    "change": "more likely"
                },
                {
                    "type": "openpi_entity",
                    "entity": "gate",
                    "attribute": "quiet",
                    "change": "less likely"
                },
                {
                    "type": "openpi_entity",
                    "entity": "group",
                    "attribute": "calling for a seat",
                    "change": "more likely"
                },
                {
                    "type": "openpi_entity",
                    "entity": "group",
                    "attribute": "calling for departure",
                    "change": "less likely"
                },
                {
                    "type": "openpi_entity",
                    "entity": "luggage",
                    "attribute": "down",
                    "change": "more likely"
                },
                {
                    "type": "openpi_entity",
                    "entity": "luggage",
                    "attribute": "up",
                    "change": "less likely"
                }
            ],
            [
                {
                    "type": "step",
                    "step": "Sit through the flight after take-off."
                },
                {
                    "type": "entity",
                    "entity": "I",
                    "attribute": "at the airport",
                    "change": "less likely"
                },
                {
                    "type": "entity",
                    "entity": "I",
                    "attribute": "in the air",
                    "change": "more likely"
                },
                {
                    "type": "multihop",
                    "event": "I make a phone call.",
                    "change": "less likely"
                },
                {
                    "type": "openpi_entity",
                    "entity": "person",
                    "attribute": "sitting",
                    "change": "more likely"
                },
                {
                    "type": "openpi_entity",
                    "entity": "person",
                    "attribute": "standing",
                    "change": "less likely"
                },
                {
                    "type": "openpi_entity",
                    "entity": "screen",
                    "attribute": "bright",
                    "change": "more likely"
                },
                {
                    "type": "openpi_entity",
                    "entity": "screen",
                    "attribute": "dark",
                    "change": "less likely"
                },
                {
                    "type": "openpi_entity",
                    "entity": "seat",
                    "attribute": "empty",
                    "change": "more likely"
                },
                {
                    "type": "openpi_entity",
                    "entity": "seat",
                    "attribute": "occupied",
                    "change": "less likely"
                },
                {
                    "type": "openpi_entity",
                    "entity": "bag",
                    "attribute": "fuller",
                    "change": "more likely"
                },
                {
                    "type": "openpi_entity",
                    "entity": "bag",
                    "attribute": "emptier",
                    "change": "less likely"
                },
                {
                    "type": "openpi_entity",
                    "entity": "seat",
                    "attribute": "empty",
                    "change": "more likely"
                },
                {
                    "type": "openpi_entity",
                    "entity": "seat",
                    "attribute": "occupied",
                    "change": "less likely"
                },
                {
                    "type": "openpi_entity",
                    "entity": "breathing",
                    "attribute": "loose",
                    "change": "more likely"
                },
                {
                    "type": "openpi_entity",
                    "entity": "breathing",
                    "attribute": "heavy",
                    "change": "less likely"
                },
                {
                    "type": "openpi_entity",
                    "entity": "person",
                    "attribute": "in the plane",
                    "change": "more likely"
                },
                {
                    "type": "openpi_entity",
                    "entity": "person",
                    "attribute": "on the floor",
                    "change": "less likely"
                }
            ],
            [
                {
                    "type": "step",
                    "step": "After the plane lands, exit the plane with all carry-on items."
                },
                {
                    "type": "entity",
                    "entity": "I",
                    "attribute": "at the airport",
                    "change": "more likely"
                },
                {
                    "type": "entity",
                    "entity": "I",
                    "attribute": "in the air",
                    "change": "less likely"
                },
                {
                    "type": "multihop",
                    "event": "I make a phone call.",
                    "change": "more likely"
                },
                {
                    "type": "openpi_entity",
                    "entity": "plane",
                    "attribute": "lighter",
                    "change": "more likely"
                },
                {
                    "type": "openpi_entity",
                    "entity": "plane",
                    "attribute": "heavier",
                    "change": "less likely"
                },
                {
                    "type": "openpi_entity",
                    "entity": "person",
                    "attribute": "sitting",
                    "change": "more likely"
                },
                {
                    "type": "openpi_entity",
                    "entity": "person",
                    "attribute": "standing",
                    "change": "less likely"
                },
                {
                    "type": "openpi_entity",
                    "entity": "luggage",
                    "attribute": "in the bags",
                    "change": "more likely"
                },
                {
                    "type": "openpi_entity",
                    "entity": "luggage",
                    "attribute": "on the table",
                    "change": "less likely"
                },
                {
                    "type": "openpi_entity",
                    "entity": "person",
                    "attribute": "outside the airport",
                    "change": "more likely"
                },
                {
                    "type": "openpi_entity",
                    "entity": "person",
                    "attribute": "inside the airport",
                    "change": "less likely"
                },
                {
                    "type": "openpi_entity",
                    "entity": "plane lands",
                    "attribute": "ready to board",
                    "change": "more likely"
                },
                {
                    "type": "openpi_entity",
                    "entity": "plane lands",
                    "attribute": "unready to board",
                    "change": "less likely"
                },
                {
                    "type": "openpi_entity",
                    "entity": "the person",
                    "attribute": "inside the airport",
                    "change": "more likely"
                },
                {
                    "type": "openpi_entity",
                    "entity": "the person",
                    "attribute": "outside the airport",
                    "change": "less likely"
                },
                {
                    "type": "openpi_entity",
                    "entity": "bag",
                    "attribute": "full",
                    "change": "more likely"
                },
                {
                    "type": "openpi_entity",
                    "entity": "bag",
                    "attribute": "empty",
                    "change": "less likely"
                },
                {
                    "type": "openpi_entity",
                    "entity": "luggage",
                    "attribute": "in the bags",
                    "change": "more likely"
                },
                {
                    "type": "openpi_entity",
                    "entity": "luggage",
                    "attribute": "on the ground",
                    "change": "less likely"
                }
            ],
            [
                {
                    "type": "step",
                    "step": "Exit to baggage claim."
                },
                {
                    "type": "openpi_entity",
                    "entity": "person",
                    "attribute": "inside of bag",
                    "change": "more likely"
                },
                {
                    "type": "openpi_entity",
                    "entity": "person",
                    "attribute": "outside of bag",
                    "change": "less likely"
                },
                {
                    "type": "openpi_entity",
                    "entity": "gate",
                    "attribute": "bought by you",
                    "change": "more likely"
                },
                {
                    "type": "openpi_entity",
                    "entity": "gate",
                    "attribute": "owned by the airline",
                    "change": "less likely"
                },
                {
                    "type": "openpi_entity",
                    "entity": "the bag",
                    "attribute": "exiting the plane",
                    "change": "more likely"
                },
                {
                    "type": "openpi_entity",
                    "entity": "the bag",
                    "attribute": "being held",
                    "change": "less likely"
                },
                {
                    "type": "openpi_entity",
                    "entity": "person",
                    "attribute": "exiting the lounge",
                    "change": "more likely"
                },
                {
                    "type": "openpi_entity",
                    "entity": "person",
                    "attribute": "in the departure lounge",
                    "change": "less likely"
                },
                {
                    "type": "openpi_entity",
                    "entity": "bag",
                    "attribute": "in the person's hand",
                    "change": "more likely"
                },
                {
                    "type": "openpi_entity",
                    "entity": "bag",
                    "attribute": "on the table",
                    "change": "less likely"
                },
                {
                    "type": "openpi_entity",
                    "entity": "person",
                    "attribute": "in the bag",
                    "change": "more likely"
                },
                {
                    "type": "openpi_entity",
                    "entity": "person",
                    "attribute": "on the floor",
                    "change": "less likely"
                },
                {
                    "type": "openpi_entity",
                    "entity": "hand",
                    "attribute": "full",
                    "change": "more likely"
                },
                {
                    "type": "openpi_entity",
                    "entity": "hand",
                    "attribute": "empty",
                    "change": "less likely"
                },
                {
                    "type": "openpi_entity",
                    "entity": "luggage",
                    "attribute": "full",
                    "change": "more likely"
                },
                {
                    "type": "openpi_entity",
                    "entity": "luggage",
                    "attribute": "empty",
                    "change": "less likely"
                }
            ],
            [
                {
                    "type": "step",
                    "step": "Take transportation."
                },
                {
                    "type": "entity",
                    "entity": "I",
                    "attribute": "at the airport",
                    "change": "less likely"
                },
                {
                    "type": "openpi_entity",
                    "entity": "the plane",
                    "attribute": "lighter",
                    "change": "more likely"
                },
                {
                    "type": "openpi_entity",
                    "entity": "the plane",
                    "attribute": "heavier",
                    "change": "less likely"
                },
                {
                    "type": "openpi_entity",
                    "entity": "the person",
                    "attribute": "inside the plane",
                    "change": "more likely"
                },
                {
                    "type": "openpi_entity",
                    "entity": "the person",
                    "attribute": "outside the plane",
                    "change": "less likely"
                },
                {
                    "type": "openpi_entity",
                    "entity": "front seat",
                    "attribute": "full",
                    "change": "more likely"
                },
                {
                    "type": "openpi_entity",
                    "entity": "front seat",
                    "attribute": "empty",
                    "change": "less likely"
                },
                {
                    "type": "openpi_entity",
                    "entity": "person",
                    "attribute": "exiting",
                    "change": "more likely"
                },
                {
                    "type": "openpi_entity",
                    "entity": "person",
                    "attribute": "holding door",
                    "change": "less likely"
                },
                {
                    "type": "openpi_entity",
                    "entity": "person",
                    "attribute": "in the back seat",
                    "change": "more likely"
                },
                {
                    "type": "openpi_entity",
                    "entity": "person",
                    "attribute": "in the front seat",
                    "change": "less likely"
                },
                {
                    "type": "openpi_entity",
                    "entity": "airline",
                    "attribute": "at door and compartment",
                    "change": "more likely"
                },
                {
                    "type": "openpi_entity",
                    "entity": "airline",
                    "attribute": "at door",
                    "change": "less likely"
                },
                {
                    "type": "openpi_entity",
                    "entity": "body",
                    "attribute": "sitting",
                    "change": "more likely"
                },
                {
                    "type": "openpi_entity",
                    "entity": "body",
                    "attribute": "standing",
                    "change": "less likely"
                },
                {
                    "type": "openpi_entity",
                    "entity": "person",
                    "attribute": "inside the plane",
                    "change": "more likely"
                },
                {
                    "type": "openpi_entity",
                    "entity": "person",
                    "attribute": "outside the plane",
                    "change": "less likely"
                },
                {
                    "type": "openpi_entity",
                    "entity": "food",
                    "attribute": "in the bags",
                    "change": "more likely"
                },
                {
                    "type": "openpi_entity",
                    "entity": "food",
                    "attribute": "in the fridge",
                    "change": "less likely"
                }
            ]
        ]
    },
    "8": {
        "goal": "Stay at a hotel",
        "annotator": "Harry",
        "steps": [
            [
                {
                    "type": "step",
                    "step": "Start."
                }
            ],
            [
                {
                    "type": "step",
                    "step": "Find a suitable hotel online."
                },
                {
                    "type": "openpi_entity",
                    "entity": "computer",
                    "attribute": "found",
                    "change": "more likely"
                },
                {
                    "type": "openpi_entity",
                    "entity": "computer",
                    "attribute": "missing",
                    "change": "less likely"
                },
                {
                    "type": "openpi_entity",
                    "entity": "hotel",
                    "attribute": "rich",
                    "change": "more likely"
                },
                {
                    "type": "openpi_entity",
                    "entity": "hotel",
                    "attribute": "poor",
                    "change": "less likely"
                },
                {
                    "type": "openpi_entity",
                    "entity": "computer",
                    "attribute": "turned on",
                    "change": "more likely"
                },
                {
                    "type": "openpi_entity",
                    "entity": "computer",
                    "attribute": "turned off",
                    "change": "less likely"
                },
                {
                    "type": "openpi_entity",
                    "entity": "hotel door",
                    "attribute": "opened",
                    "change": "more likely"
                },
                {
                    "type": "openpi_entity",
                    "entity": "hotel door",
                    "attribute": "closed",
                    "change": "less likely"
                },
                {
                    "type": "openpi_entity",
                    "entity": "hotel door",
                    "attribute": "open",
                    "change": "more likely"
                },
                {
                    "type": "openpi_entity",
                    "entity": "hotel door",
                    "attribute": "closed",
                    "change": "less likely"
                },
                {
                    "type": "openpi_entity",
                    "entity": "hotel",
                    "attribute": "available",
                    "change": "more likely"
                },
                {
                    "type": "openpi_entity",
                    "entity": "hotel",
                    "attribute": "unavailable",
                    "change": "less likely"
                },
                {
                    "type": "openpi_entity",
                    "entity": "money",
                    "attribute": "in hotel register",
                    "change": "more likely"
                },
                {
                    "type": "openpi_entity",
                    "entity": "money",
                    "attribute": "in wallet",
                    "change": "less likely"
                },
                {
                    "type": "openpi_entity",
                    "entity": "computer",
                    "attribute": "informative",
                    "change": "more likely"
                },
                {
                    "type": "openpi_entity",
                    "entity": "computer",
                    "attribute": "uninformative",
                    "change": "less likely"
                },
                {
                    "type": "openpi_entity",
                    "entity": "hotel",
                    "attribute": "in inventory",
                    "change": "more likely"
                },
                {
                    "type": "openpi_entity",
                    "entity": "hotel",
                    "attribute": "online",
                    "change": "less likely"
                }
            ],
            [
                {
                    "type": "step",
                    "step": "Book a reservation by using the hotel website or calling the hotel."
                },
                {
                    "type": "entity",
                    "entity": "hotel room",
                    "attribute": "booked",
                    "change": "more likely"
                },
                {
                    "type": "multihop",
                    "event": "The hotel knows when I\u2019m arriving.",
                    "change": "more likely"
                },
                {
                    "type": "openpi_entity",
                    "entity": "hotel website",
                    "attribute": "purchased",
                    "change": "more likely"
                },
                {
                    "type": "openpi_entity",
                    "entity": "hotel website",
                    "attribute": "unpurchased",
                    "change": "less likely"
                },
                {
                    "type": "openpi_entity",
                    "entity": "hotel cash register",
                    "attribute": "filled with hotels' cash",
                    "change": "more likely"
                },
                {
                    "type": "openpi_entity",
                    "entity": "hotel cash register",
                    "attribute": "empty",
                    "change": "less likely"
                },
                {
                    "type": "openpi_entity",
                    "entity": "cheque",
                    "attribute": "paid for",
                    "change": "more likely"
                },
                {
                    "type": "openpi_entity",
                    "entity": "cheque",
                    "attribute": "due",
                    "change": "less likely"
                },
                {
                    "type": "openpi_entity",
                    "entity": "hotel phone line",
                    "attribute": "idle",
                    "change": "more likely"
                },
                {
                    "type": "openpi_entity",
                    "entity": "hotel phone line",
                    "attribute": "ringing",
                    "change": "less likely"
                },
                {
                    "type": "openpi_entity",
                    "entity": "room",
                    "attribute": "turned on",
                    "change": "more likely"
                },
                {
                    "type": "openpi_entity",
                    "entity": "room",
                    "attribute": "turned off",
                    "change": "less likely"
                },
                {
                    "type": "openpi_entity",
                    "entity": "reservation",
                    "attribute": "made",
                    "change": "more likely"
                },
                {
                    "type": "openpi_entity",
                    "entity": "reservation",
                    "attribute": "missing",
                    "change": "less likely"
                },
                {
                    "type": "openpi_entity",
                    "entity": "hotel",
                    "attribute": "present for appointment",
                    "change": "more likely"
                },
                {
                    "type": "openpi_entity",
                    "entity": "hotel",
                    "attribute": "missing for appointment",
                    "change": "less likely"
                },
                {
                    "type": "openpi_entity",
                    "entity": "hotel website",
                    "attribute": "accessed",
                    "change": "more likely"
                },
                {
                    "type": "openpi_entity",
                    "entity": "hotel website",
                    "attribute": "unaccessed",
                    "change": "less likely"
                }
            ],
            [
                {
                    "type": "step",
                    "step": "Arrive at the hotel."
                },
                {
                    "type": "openpi_entity",
                    "entity": "hotel door",
                    "attribute": "turned on",
                    "change": "more likely"
                },
                {
                    "type": "openpi_entity",
                    "entity": "hotel door",
                    "attribute": "turned off",
                    "change": "less likely"
                },
                {
                    "type": "openpi_entity",
                    "entity": "bag",
                    "attribute": "at the hotel` hotel`",
                    "change": "more likely"
                },
                {
                    "type": "openpi_entity",
                    "entity": "bag",
                    "attribute": "in the hotel register",
                    "change": "less likely"
                },
                {
                    "type": "openpi_entity",
                    "entity": "person",
                    "attribute": "leaving the hotel lobby",
                    "change": "more likely"
                },
                {
                    "type": "openpi_entity",
                    "entity": "person",
                    "attribute": "entering the hotel lobby",
                    "change": "less likely"
                },
                {
                    "type": "openpi_entity",
                    "entity": "hotel door",
                    "attribute": "closed",
                    "change": "more likely"
                },
                {
                    "type": "openpi_entity",
                    "entity": "hotel door",
                    "attribute": "open",
                    "change": "less likely"
                },
                {
                    "type": "openpi_entity",
                    "entity": "room",
                    "attribute": "arranged",
                    "change": "more likely"
                },
                {
                    "type": "openpi_entity",
                    "entity": "room",
                    "attribute": "unarranged",
                    "change": "less likely"
                }
            ],
            [
                {
                    "type": "step",
                    "step": "Check in at the front desk and receive your room key."
                },
                {
                    "type": "entity",
                    "entity": "I",
                    "attribute": "checked in to the hotel",
                    "change": "more likely"
                },
                {
                    "type": "multihop",
                    "event": "I have a hotel room key.",
                    "change": "more likely"
                },
                {
                    "type": "openpi_entity",
                    "entity": "desk",
                    "attribute": "being moved forward",
                    "change": "more likely"
                },
                {
                    "type": "openpi_entity",
                    "entity": "desk",
                    "attribute": "being cleaned up",
                    "change": "less likely"
                },
                {
                    "type": "openpi_entity",
                    "entity": "room",
                    "attribute": "accessed",
                    "change": "more likely"
                },
                {
                    "type": "openpi_entity",
                    "entity": "room",
                    "attribute": "secure",
                    "change": "less likely"
                },
                {
                    "type": "openpi_entity",
                    "entity": "door",
                    "attribute": "open",
                    "change": "more likely"
                },
                {
                    "type": "openpi_entity",
                    "entity": "door",
                    "attribute": "closed",
                    "change": "less likely"
                },
                {
                    "type": "openpi_entity",
                    "entity": "door",
                    "attribute": "unlocked",
                    "change": "more likely"
                },
                {
                    "type": "openpi_entity",
                    "entity": "door",
                    "attribute": "locked",
                    "change": "less likely"
                },
                {
                    "type": "openpi_entity",
                    "entity": "front desk",
                    "attribute": "being moved forward",
                    "change": "more likely"
                },
                {
                    "type": "openpi_entity",
                    "entity": "front desk",
                    "attribute": "being cleaned up",
                    "change": "less likely"
                }
            ],
            [
                {
                    "type": "step",
                    "step": "Arrive at the room."
                },
                {
                    "type": "openpi_entity",
                    "entity": "key",
                    "attribute": "pressed into the lock box",
                    "change": "more likely"
                },
                {
                    "type": "openpi_entity",
                    "entity": "key",
                    "attribute": "in the drawer",
                    "change": "less likely"
                },
                {
                    "type": "openpi_entity",
                    "entity": "room",
                    "attribute": "locked",
                    "change": "more likely"
                },
                {
                    "type": "openpi_entity",
                    "entity": "room",
                    "attribute": "unlocked",
                    "change": "less likely"
                },
                {
                    "type": "openpi_entity",
                    "entity": "door",
                    "attribute": "closed",
                    "change": "more likely"
                },
                {
                    "type": "openpi_entity",
                    "entity": "door",
                    "attribute": "open",
                    "change": "less likely"
                },
                {
                    "type": "openpi_entity",
                    "entity": "person",
                    "attribute": "sitting in front of the door",
                    "change": "more likely"
                },
                {
                    "type": "openpi_entity",
                    "entity": "person",
                    "attribute": "standing",
                    "change": "less likely"
                },
                {
                    "type": "openpi_entity",
                    "entity": "door",
                    "attribute": "closed",
                    "change": "more likely"
                },
                {
                    "type": "openpi_entity",
                    "entity": "door",
                    "attribute": "opened",
                    "change": "less likely"
                }
            ],
            [
                {
                    "type": "step",
                    "step": "Order in-room dining and use the hotel's amenities such as gym and spa."
                },
                {
                    "type": "openpi_entity",
                    "entity": "screen",
                    "attribute": "colored",
                    "change": "more likely"
                },
                {
                    "type": "openpi_entity",
                    "entity": "screen",
                    "attribute": "black",
                    "change": "less likely"
                },
                {
                    "type": "openpi_entity",
                    "entity": "room",
                    "attribute": "purchased",
                    "change": "more likely"
                },
                {
                    "type": "openpi_entity",
                    "entity": "room",
                    "attribute": "being used",
                    "change": "less likely"
                },
                {
                    "type": "openpi_entity",
                    "entity": "room",
                    "attribute": "being used",
                    "change": "more likely"
                },
                {
                    "type": "openpi_entity",
                    "entity": "room",
                    "attribute": "idle",
                    "change": "less likely"
                },
                {
                    "type": "openpi_entity",
                    "entity": "bandwidth",
                    "attribute": "more available",
                    "change": "more likely"
                },
                {
                    "type": "openpi_entity",
                    "entity": "bandwidth",
                    "attribute": "less available",
                    "change": "less likely"
                },
                {
                    "type": "openpi_entity",
                    "entity": "hotel",
                    "attribute": "turned on",
                    "change": "more likely"
                },
                {
                    "type": "openpi_entity",
                    "entity": "hotel",
                    "attribute": "turned off",
                    "change": "less likely"
                },
                {
                    "type": "openpi_entity",
                    "entity": "food",
                    "attribute": "served",
                    "change": "more likely"
                },
                {
                    "type": "openpi_entity",
                    "entity": "food",
                    "attribute": "missing",
                    "change": "less likely"
                },
                {
                    "type": "openpi_entity",
                    "entity": "food",
                    "attribute": "in hotel lobby",
                    "change": "more likely"
                },
                {
                    "type": "openpi_entity",
                    "entity": "food",
                    "attribute": "in car",
                    "change": "less likely"
                }
            ],
            [
                {
                    "type": "step",
                    "step": "Check out from the hotel."
                },
                {
                    "type": "entity",
                    "entity": "you",
                    "attribute": "staying in the hotel",
                    "change": "less likely"
                },
                {
                    "type": "multihop",
                    "event": "I have a hotel room key.",
                    "change": "less likely"
                },
                {
                    "type": "openpi_entity",
                    "entity": "door",
                    "attribute": "opened",
                    "change": "more likely"
                },
                {
                    "type": "openpi_entity",
                    "entity": "door",
                    "attribute": "closed",
                    "change": "less likely"
                },
                {
                    "type": "openpi_entity",
                    "entity": "hotel",
                    "attribute": "in the back",
                    "change": "more likely"
                },
                {
                    "type": "openpi_entity",
                    "entity": "hotel",
                    "attribute": "at the entrance",
                    "change": "less likely"
                },
                {
                    "type": "openpi_entity",
                    "entity": "head",
                    "attribute": "tilted backward",
                    "change": "more likely"
                },
                {
                    "type": "openpi_entity",
                    "entity": "head",
                    "attribute": "leaning forward",
                    "change": "less likely"
                }
            ]
        ]
    },
    "9": {
        "goal": "Project computer screen with an HDMI cable",
        "annotator": "Harry",
        "steps": [
            [
                {
                    "type": "step",
                    "step": "Start."
                }
            ],
            [
                {
                    "type": "step",
                    "step": "Turn on the computer."
                },
                {
                    "type": "entity",
                    "entity": "computer",
                    "attribute": "powered on",
                    "change": "more likely"
                },
                {
                    "type": "multihop",
                    "event": "I adjust the display settings of the computer.",
                    "change": "more likely"
                },
                {
                    "type": "openpi_entity",
                    "entity": "computer",
                    "attribute": "on",
                    "change": "more likely"
                },
                {
                    "type": "openpi_entity",
                    "entity": "computer",
                    "attribute": "off",
                    "change": "less likely"
                },
                {
                    "type": "openpi_entity",
                    "entity": "computer",
                    "attribute": "on",
                    "change": "more likely"
                },
                {
                    "type": "openpi_entity",
                    "entity": "computer",
                    "attribute": "off",
                    "change": "less likely"
                },
                {
                    "type": "openpi_entity",
                    "entity": "computer",
                    "attribute": "on",
                    "change": "more likely"
                },
                {
                    "type": "openpi_entity",
                    "entity": "computer",
                    "attribute": "off",
                    "change": "less likely"
                },
                {
                    "type": "openpi_entity",
                    "entity": "knob",
                    "attribute": "in the on position",
                    "change": "more likely"
                },
                {
                    "type": "openpi_entity",
                    "entity": "knob",
                    "attribute": "in the off position",
                    "change": "less likely"
                }
            ],
            [
                {
                    "type": "step",
                    "step": "Turn on the monitor."
                },
                {
                    "type": "entity",
                    "entity": "monitor",
                    "attribute": "powered on",
                    "change": "more likely"
                },
                {
                    "type": "multihop",
                    "event": "I adjust the display settings of the monitor.",
                    "change": "more likely"
                },
                {
                    "type": "openpi_entity",
                    "entity": "monitor knob",
                    "attribute": "in the on position",
                    "change": "more likely"
                },
                {
                    "type": "openpi_entity",
                    "entity": "monitor knob",
                    "attribute": "in the off position",
                    "change": "less likely"
                },
                {
                    "type": "openpi_entity",
                    "entity": "monitor",
                    "attribute": "on",
                    "change": "more likely"
                },
                {
                    "type": "openpi_entity",
                    "entity": "monitor",
                    "attribute": "off",
                    "change": "less likely"
                },
                {
                    "type": "openpi_entity",
                    "entity": "screen",
                    "attribute": "bright",
                    "change": "more likely"
                },
                {
                    "type": "openpi_entity",
                    "entity": "screen",
                    "attribute": "dark",
                    "change": "less likely"
                },
                {
                    "type": "openpi_entity",
                    "entity": "monitor",
                    "attribute": "on",
                    "change": "more likely"
                },
                {
                    "type": "openpi_entity",
                    "entity": "monitor",
                    "attribute": "off",
                    "change": "less likely"
                },
                {
                    "type": "openpi_entity",
                    "entity": "monitor",
                    "attribute": "bright",
                    "change": "more likely"
                },
                {
                    "type": "openpi_entity",
                    "entity": "monitor",
                    "attribute": "dark",
                    "change": "less likely"
                },
                {
                    "type": "openpi_entity",
                    "entity": "screen",
                    "attribute": "lit up",
                    "change": "more likely"
                },
                {
                    "type": "openpi_entity",
                    "entity": "screen",
                    "attribute": "dark",
                    "change": "less likely"
                }
            ],
            [
                {
                    "type": "step",
                    "step": "Select the correct source of the monitor."
                },
                {
                    "type": "openpi_entity",
                    "entity": "monitor",
                    "attribute": "horizontal",
                    "change": "more likely"
                },
                {
                    "type": "openpi_entity",
                    "entity": "monitor",
                    "attribute": "vertical",
                    "change": "less likely"
                },
                {
                    "type": "openpi_entity",
                    "entity": "mouse cursor",
                    "attribute": "in hand",
                    "change": "more likely"
                },
                {
                    "type": "openpi_entity",
                    "entity": "mouse cursor",
                    "attribute": "in inventory",
                    "change": "less likely"
                },
                {
                    "type": "openpi_entity",
                    "entity": "monitor",
                    "attribute": "on",
                    "change": "more likely"
                },
                {
                    "type": "openpi_entity",
                    "entity": "monitor",
                    "attribute": "off",
                    "change": "less likely"
                }
            ],
            [
                {
                    "type": "step",
                    "step": "Connect the computer and the monitor with an HDMI cable."
                },
                {
                    "type": "entity",
                    "entity": "HDMI cable",
                    "attribute": "connected in both ends",
                    "change": "more likely"
                },
                {
                    "type": "multihop",
                    "event": "The monitor projects images from the computer.",
                    "change": "more likely"
                },
                {
                    "type": "openpi_entity",
                    "entity": "monitor",
                    "attribute": "connected",
                    "change": "more likely"
                },
                {
                    "type": "openpi_entity",
                    "entity": "monitor",
                    "attribute": "unconnected",
                    "change": "less likely"
                },
                {
                    "type": "openpi_entity",
                    "entity": "monitor",
                    "attribute": "turned on",
                    "change": "more likely"
                },
                {
                    "type": "openpi_entity",
                    "entity": "monitor",
                    "attribute": "turned off",
                    "change": "less likely"
                },
                {
                    "type": "openpi_entity",
                    "entity": "monitor",
                    "attribute": "connected",
                    "change": "more likely"
                },
                {
                    "type": "openpi_entity",
                    "entity": "monitor",
                    "attribute": "unconnected",
                    "change": "less likely"
                },
                {
                    "type": "openpi_entity",
                    "entity": "computer",
                    "attribute": "connected",
                    "change": "more likely"
                },
                {
                    "type": "openpi_entity",
                    "entity": "computer",
                    "attribute": "disconnected",
                    "change": "less likely"
                },
                {
                    "type": "openpi_entity",
                    "entity": "monitor",
                    "attribute": "connected",
                    "change": "more likely"
                },
                {
                    "type": "openpi_entity",
                    "entity": "monitor",
                    "attribute": "turned off",
                    "change": "less likely"
                }
            ],
            [
                {
                    "type": "step",
                    "step": "Adjust the projection settings on the computer."
                },
                {
                    "type": "openpi_entity",
                    "entity": "monitor",
                    "attribute": "on",
                    "change": "more likely"
                },
                {
                    "type": "openpi_entity",
                    "entity": "monitor",
                    "attribute": "off",
                    "change": "less likely"
                },
                {
                    "type": "openpi_entity",
                    "entity": "screen",
                    "attribute": "turned on",
                    "change": "more likely"
                },
                {
                    "type": "openpi_entity",
                    "entity": "screen",
                    "attribute": "turned off",
                    "change": "less likely"
                },
                {
                    "type": "openpi_entity",
                    "entity": "monitor",
                    "attribute": "on",
                    "change": "more likely"
                },
                {
                    "type": "openpi_entity",
                    "entity": "monitor",
                    "attribute": "off",
                    "change": "less likely"
                },
                {
                    "type": "openpi_entity",
                    "entity": "setting for monitor",
                    "attribute": "checked",
                    "change": "more likely"
                },
                {
                    "type": "openpi_entity",
                    "entity": "setting for monitor",
                    "attribute": "unchecked",
                    "change": "less likely"
                }
            ]
        ]
    },
    "10": {
        "goal": "Start a YouTube channel",
        "annotator": "Harry",
        "steps": [
            [
                {
                    "type": "step",
                    "step": "Start."
                }
            ],
            [
                {
                    "type": "step",
                    "step": "Decide on a theme and be prepared to stick to it in the long run."
                }
            ],
            [
                {
                    "type": "step",
                    "step": "Come up with a channel name."
                },
                {
                    "type": "openpi_entity",
                    "entity": "channel",
                    "attribute": "made",
                    "change": "more likely"
                },
                {
                    "type": "openpi_entity",
                    "entity": "channel",
                    "attribute": "unmade",
                    "change": "less likely"
                },
                {
                    "type": "openpi_entity",
                    "entity": "channel",
                    "attribute": "named",
                    "change": "more likely"
                },
                {
                    "type": "openpi_entity",
                    "entity": "channel",
                    "attribute": "random",
                    "change": "less likely"
                },
                {
                    "type": "openpi_entity",
                    "entity": "name",
                    "attribute": "written",
                    "change": "more likely"
                },
                {
                    "type": "openpi_entity",
                    "entity": "name",
                    "attribute": "unwritten",
                    "change": "less likely"
                },
                {
                    "type": "openpi_entity",
                    "entity": "channel",
                    "attribute": "written",
                    "change": "more likely"
                },
                {
                    "type": "openpi_entity",
                    "entity": "channel",
                    "attribute": "written",
                    "change": "less likely"
                },
                {
                    "type": "openpi_entity",
                    "entity": "name",
                    "attribute": "selected",
                    "change": "more likely"
                },
                {
                    "type": "openpi_entity",
                    "entity": "name",
                    "attribute": "unselected",
                    "change": "less likely"
                },
                {
                    "type": "openpi_entity",
                    "entity": "channel",
                    "attribute": "written",
                    "change": "more likely"
                },
                {
                    "type": "openpi_entity",
                    "entity": "channel",
                    "attribute": "unwritten",
                    "change": "less likely"
                }
            ],
            [
                {
                    "type": "step",
                    "step": "Register a Google account if you don't have one."
                },
                {
                    "type": "openpi_entity",
                    "entity": "google account",
                    "attribute": "registered",
                    "change": "more likely"
                },
                {
                    "type": "openpi_entity",
                    "entity": "google account",
                    "attribute": "missing",
                    "change": "less likely"
                },
                {
                    "type": "openpi_entity",
                    "entity": "account",
                    "attribute": "registered",
                    "change": "more likely"
                },
                {
                    "type": "openpi_entity",
                    "entity": "account",
                    "attribute": "unregistered",
                    "change": "less likely"
                },
                {
                    "type": "openpi_entity",
                    "entity": "account",
                    "attribute": "created",
                    "change": "more likely"
                },
                {
                    "type": "openpi_entity",
                    "entity": "account",
                    "attribute": "missing",
                    "change": "less likely"
                },
                {
                    "type": "openpi_entity",
                    "entity": "account",
                    "attribute": "registered",
                    "change": "more likely"
                },
                {
                    "type": "openpi_entity",
                    "entity": "account",
                    "attribute": "unregistered",
                    "change": "less likely"
                }
            ],
            [
                {
                    "type": "step",
                    "step": "Create your YouTube channel with your Google account. "
                },
                {
                    "type": "entity",
                    "entity": "the channel",
                    "attribute": "accessible",
                    "change": "more likely"
                },
                {
                    "type": "multihop",
                    "event": "Someone finds my video using a URL.",
                    "change": "more likely"
                },
                {
                    "type": "openpi_entity",
                    "entity": "google account",
                    "attribute": "present",
                    "change": "more likely"
                },
                {
                    "type": "openpi_entity",
                    "entity": "google account",
                    "attribute": "missing",
                    "change": "less likely"
                },
                {
                    "type": "openpi_entity",
                    "entity": "channel",
                    "attribute": "created",
                    "change": "more likely"
                },
                {
                    "type": "openpi_entity",
                    "entity": "channel",
                    "attribute": "absent",
                    "change": "less likely"
                },
                {
                    "type": "openpi_entity",
                    "entity": "channel",
                    "attribute": "created",
                    "change": "more likely"
                },
                {
                    "type": "openpi_entity",
                    "entity": "channel",
                    "attribute": "uncreated",
                    "change": "less likely"
                },
                {
                    "type": "openpi_entity",
                    "entity": "channel",
                    "attribute": "created",
                    "change": "more likely"
                },
                {
                    "type": "openpi_entity",
                    "entity": "channel",
                    "attribute": "unmade",
                    "change": "less likely"
                }
            ],
            [
                {
                    "type": "step",
                    "step": "Procure a banner art and add it to your main page."
                },
                {
                    "type": "openpi_entity",
                    "entity": "url",
                    "attribute": "added to main page",
                    "change": "more likely"
                },
                {
                    "type": "openpi_entity",
                    "entity": "url",
                    "attribute": "on google",
                    "change": "less likely"
                },
                {
                    "type": "openpi_entity",
                    "entity": "ad space",
                    "attribute": "present",
                    "change": "more likely"
                },
                {
                    "type": "openpi_entity",
                    "entity": "ad space",
                    "attribute": "missing",
                    "change": "less likely"
                },
                {
                    "type": "openpi_entity",
                    "entity": "page",
                    "attribute": "decorated",
                    "change": "more likely"
                },
                {
                    "type": "openpi_entity",
                    "entity": "page",
                    "attribute": "bare",
                    "change": "less likely"
                },
                {
                    "type": "openpi_entity",
                    "entity": "video",
                    "attribute": "cut",
                    "change": "more likely"
                },
                {
                    "type": "openpi_entity",
                    "entity": "video",
                    "attribute": "uncut",
                    "change": "less likely"
                },
                {
                    "type": "openpi_entity",
                    "entity": "art",
                    "attribute": "purchased from store",
                    "change": "more likely"
                },
                {
                    "type": "openpi_entity",
                    "entity": "art",
                    "attribute": "on sale in store",
                    "change": "less likely"
                },
                {
                    "type": "openpi_entity",
                    "entity": "google ad space",
                    "attribute": "present",
                    "change": "more likely"
                },
                {
                    "type": "openpi_entity",
                    "entity": "google ad space",
                    "attribute": "missing",
                    "change": "less likely"
                },
                {
                    "type": "openpi_entity",
                    "entity": "account",
                    "attribute": "procured",
                    "change": "more likely"
                },
                {
                    "type": "openpi_entity",
                    "entity": "account",
                    "attribute": "unprocured",
                    "change": "less likely"
                }
            ],
            [
                {
                    "type": "step",
                    "step": "Upload your first video."
                },
                {
                    "type": "entity",
                    "entity": "your channel",
                    "attribute": "have a video",
                    "change": "more likely"
                },
                {
                    "type": "multihop",
                    "event": "Someone watches a video from my channel.",
                    "change": "more likely"
                },
                {
                    "type": "openpi_entity",
                    "entity": "video",
                    "attribute": "uploaded",
                    "change": "more likely"
                },
                {
                    "type": "openpi_entity",
                    "entity": "video",
                    "attribute": "absent",
                    "change": "less likely"
                },
                {
                    "type": "openpi_entity",
                    "entity": "first video",
                    "attribute": "uploaded",
                    "change": "more likely"
                },
                {
                    "type": "openpi_entity",
                    "entity": "first video",
                    "attribute": "unposted",
                    "change": "less likely"
                },
                {
                    "type": "openpi_entity",
                    "entity": "image",
                    "attribute": "uploaded",
                    "change": "more likely"
                },
                {
                    "type": "openpi_entity",
                    "entity": "image",
                    "attribute": "absent",
                    "change": "less likely"
                }
            ],
            [
                {
                    "type": "step",
                    "step": "Interact with comments."
                },
                {
                    "type": "openpi_entity",
                    "entity": "person",
                    "attribute": "following others",
                    "change": "more likely"
                },
                {
                    "type": "openpi_entity",
                    "entity": "person",
                    "attribute": "unfollowing others",
                    "change": "less likely"
                }
            ],
            [
                {
                    "type": "step",
                    "step": "Track statistics in the Creator Studio."
                },
                {
                    "type": "openpi_entity",
                    "entity": "developer",
                    "attribute": "watching",
                    "change": "more likely"
                },
                {
                    "type": "openpi_entity",
                    "entity": "developer",
                    "attribute": "inactive",
                    "change": "less likely"
                },
                {
                    "type": "openpi_entity",
                    "entity": "player",
                    "attribute": "watching",
                    "change": "more likely"
                },
                {
                    "type": "openpi_entity",
                    "entity": "player",
                    "attribute": "idling",
                    "change": "less likely"
                }
            ]
        ]
    },
    "11": {
        "goal": "Make tea with tea bags",
        "annotator": "Harry",
        "steps": [
            [
                {
                    "step": "Start."
                }
            ],
            [
                {
                    "type": "step",
                    "step": "Heat water to a boil with an electric kettle."
                },
                {
                    "type": "entity",
                    "entity": "water",
                    "attribute": "boiling",
                    "change": "more likely"
                },
                {
                    "type": "multihop",
                    "event": "There is a sound coming from the kettle.",
                    "change": "more likely"
                },
                {
                    "type": "openpi_entity",
                    "entity": "water faucet",
                    "attribute": "on",
                    "change": "more likely"
                },
                {
                    "type": "openpi_entity",
                    "entity": "water faucet",
                    "attribute": "off",
                    "change": "less likely"
                },
                {
                    "type": "openpi_entity",
                    "entity": "stove",
                    "attribute": "on",
                    "change": "more likely"
                },
                {
                    "type": "openpi_entity",
                    "entity": "stove",
                    "attribute": "off",
                    "change": "less likely"
                },
                {
                    "type": "openpi_entity",
                    "entity": "stove burner",
                    "attribute": "on",
                    "change": "more likely"
                },
                {
                    "type": "openpi_entity",
                    "entity": "stove burner",
                    "attribute": "off",
                    "change": "less likely"
                },
                {
                    "type": "openpi_entity",
                    "entity": "stove",
                    "attribute": "on",
                    "change": "more likely"
                },
                {
                    "type": "openpi_entity",
                    "entity": "stove",
                    "attribute": "off",
                    "change": "less likely"
                },
                {
                    "type": "openpi_entity",
                    "entity": "pot",
                    "attribute": "wet",
                    "change": "more likely"
                },
                {
                    "type": "openpi_entity",
                    "entity": "pot",
                    "attribute": "dry",
                    "change": "less likely"
                },
                {
                    "type": "openpi_entity",
                    "entity": "stove top",
                    "attribute": "hot",
                    "change": "more likely"
                },
                {
                    "type": "openpi_entity",
                    "entity": "stove top",
                    "attribute": "cool",
                    "change": "less likely"
                },
                {
                    "type": "openpi_entity",
                    "entity": "water",
                    "attribute": "hot",
                    "change": "more likely"
                },
                {
                    "type": "openpi_entity",
                    "entity": "water",
                    "attribute": "cool",
                    "change": "less likely"
                },
                {
                    "type": "openpi_entity",
                    "entity": "pot",
                    "attribute": "hot",
                    "change": "more likely"
                },
                {
                    "type": "openpi_entity",
                    "entity": "pot",
                    "attribute": "cold",
                    "change": "less likely"
                },
                {
                    "type": "openpi_entity",
                    "entity": "kettle",
                    "attribute": "hot",
                    "change": "more likely"
                },
                {
                    "type": "openpi_entity",
                    "entity": "kettle",
                    "attribute": "cool",
                    "change": "less likely"
                },
                {
                    "type": "openpi_entity",
                    "entity": "water",
                    "attribute": "boiling",
                    "change": "more likely"
                },
                {
                    "type": "openpi_entity",
                    "entity": "water",
                    "attribute": "cold",
                    "change": "less likely"
                },
                {
                    "type": "openpi_entity",
                    "entity": "pot",
                    "attribute": "wet",
                    "change": "more likely"
                },
                {
                    "type": "openpi_entity",
                    "entity": "pot",
                    "attribute": "dry",
                    "change": "less likely"
                },
                {
                    "type": "openpi_entity",
                    "entity": "water",
                    "attribute": "hot",
                    "change": "more likely"
                },
                {
                    "type": "openpi_entity",
                    "entity": "water",
                    "attribute": "cold",
                    "change": "less likely"
                }
            ],
            [
                {
                    "type": "step",
                    "step": "Place the tea bag in a mug."
                },
                {
                    "type": "openpi_entity",
                    "entity": "mug",
                    "attribute": "full",
                    "change": "more likely"
                },
                {
                    "type": "openpi_entity",
                    "entity": "mug",
                    "attribute": "empty",
                    "change": "less likely"
                },
                {
                    "type": "openpi_entity",
                    "entity": "tea bag",
                    "attribute": "wet",
                    "change": "more likely"
                },
                {
                    "type": "openpi_entity",
                    "entity": "tea bag",
                    "attribute": "dry",
                    "change": "less likely"
                },
                {
                    "type": "openpi_entity",
                    "entity": "mug",
                    "attribute": "in hand",
                    "change": "more likely"
                },
                {
                    "type": "openpi_entity",
                    "entity": "mug",
                    "attribute": "in cupboard",
                    "change": "less likely"
                },
                {
                    "type": "openpi_entity",
                    "entity": "tea bag",
                    "attribute": "in a mug",
                    "change": "more likely"
                },
                {
                    "type": "openpi_entity",
                    "entity": "tea bag",
                    "attribute": "in a package",
                    "change": "less likely"
                },
                {
                    "type": "openpi_entity",
                    "entity": "mug",
                    "attribute": "wet",
                    "change": "more likely"
                },
                {
                    "type": "openpi_entity",
                    "entity": "mug",
                    "attribute": "dry",
                    "change": "less likely"
                },
                {
                    "type": "openpi_entity",
                    "entity": "mug",
                    "attribute": "hot",
                    "change": "more likely"
                },
                {
                    "type": "openpi_entity",
                    "entity": "mug",
                    "attribute": "room temperature",
                    "change": "less likely"
                },
                {
                    "type": "openpi_entity",
                    "entity": "mug",
                    "attribute": "dirty",
                    "change": "more likely"
                },
                {
                    "type": "openpi_entity",
                    "entity": "mug",
                    "attribute": "clean",
                    "change": "less likely"
                },
                {
                    "type": "openpi_entity",
                    "entity": "mug",
                    "attribute": "heavier",
                    "change": "more likely"
                },
                {
                    "type": "openpi_entity",
                    "entity": "mug",
                    "attribute": "lighter",
                    "change": "less likely"
                },
                {
                    "type": "openpi_entity",
                    "entity": "tea bag",
                    "attribute": "hot",
                    "change": "more likely"
                },
                {
                    "type": "openpi_entity",
                    "entity": "tea bag",
                    "attribute": "cold",
                    "change": "less likely"
                },
                {
                    "type": "openpi_entity",
                    "entity": "mug",
                    "attribute": "holding tea bag in hand",
                    "change": "more likely"
                },
                {
                    "type": "openpi_entity",
                    "entity": "mug",
                    "attribute": "empty",
                    "change": "less likely"
                },
                {
                    "type": "openpi_entity",
                    "entity": "cupboard",
                    "attribute": "hot",
                    "change": "more likely"
                },
                {
                    "type": "openpi_entity",
                    "entity": "cupboard",
                    "attribute": "warm",
                    "change": "less likely"
                }
            ],
            [
                {
                    "type": "step",
                    "step": "Carefully pour the boiling water to the mug."
                },
                {
                    "type": "entity",
                    "entity": "water",
                    "attribute": "boiling",
                    "change": "less likely"
                },
                {
                    "type": "multihop",
                    "event": "There is a sound coming from the kettle.",
                    "change": "less likely"
                },
                {
                    "type": "entity",
                    "entity": "the tea bag",
                    "attribute": "wet",
                    "change": "more likely"
                },
                {
                    "type": "multihop",
                    "event": "I put the tea bag back to its box.",
                    "change": "less likely"
                },
                {
                    "type": "entity",
                    "entity": "the mug",
                    "attribute": "containing hot water",
                    "change": "more likely"
                },
                {
                    "type": "multihop",
                    "event": "It is dangerous if the mug is knocked over.",
                    "change": "more likely"
                },
                {
                    "type": "entity",
                    "entity": "the water",
                    "attribute": "transparent",
                    "change": "less likely"
                },
                {
                    "type": "multihop",
                    "event": "The water has a taste of tea.",
                    "change": "more likely"
                },
                {
                    "type": "openpi_entity",
                    "entity": "mug",
                    "attribute": "wet",
                    "change": "more likely"
                },
                {
                    "type": "openpi_entity",
                    "entity": "mug",
                    "attribute": "dry",
                    "change": "less likely"
                },
                {
                    "type": "openpi_entity",
                    "entity": "water",
                    "attribute": "in the mug",
                    "change": "more likely"
                },
                {
                    "type": "openpi_entity",
                    "entity": "water",
                    "attribute": "in the kettle",
                    "change": "less likely"
                },
                {
                    "type": "openpi_entity",
                    "entity": "mug",
                    "attribute": "covered in water",
                    "change": "more likely"
                },
                {
                    "type": "openpi_entity",
                    "entity": "mug",
                    "attribute": "clean",
                    "change": "less likely"
                },
                {
                    "type": "openpi_entity",
                    "entity": "water",
                    "attribute": "boiling",
                    "change": "more likely"
                },
                {
                    "type": "openpi_entity",
                    "entity": "water",
                    "attribute": "cooler",
                    "change": "less likely"
                },
                {
                    "type": "openpi_entity",
                    "entity": "tea",
                    "attribute": "carbonated",
                    "change": "more likely"
                },
                {
                    "type": "openpi_entity",
                    "entity": "tea",
                    "attribute": "uncarbonated",
                    "change": "less likely"
                },
                {
                    "type": "openpi_entity",
                    "entity": "mug",
                    "attribute": "hot",
                    "change": "more likely"
                },
                {
                    "type": "openpi_entity",
                    "entity": "mug",
                    "attribute": "room temperature",
                    "change": "less likely"
                },
                {
                    "type": "openpi_entity",
                    "entity": "kettle",
                    "attribute": "hot",
                    "change": "more likely"
                },
                {
                    "type": "openpi_entity",
                    "entity": "kettle",
                    "attribute": "cold",
                    "change": "less likely"
                },
                {
                    "type": "openpi_entity",
                    "entity": "hand",
                    "attribute": "covered in water",
                    "change": "more likely"
                },
                {
                    "type": "openpi_entity",
                    "entity": "hand",
                    "attribute": "clean",
                    "change": "less likely"
                },
                {
                    "type": "openpi_entity",
                    "entity": "mug",
                    "attribute": "full",
                    "change": "more likely"
                },
                {
                    "type": "openpi_entity",
                    "entity": "mug",
                    "attribute": "empty",
                    "change": "less likely"
                },
                {
                    "type": "openpi_entity",
                    "entity": "mug",
                    "attribute": "holding water",
                    "change": "more likely"
                },
                {
                    "type": "openpi_entity",
                    "entity": "mug",
                    "attribute": "empty",
                    "change": "less likely"
                },
                {
                    "type": "openpi_entity",
                    "entity": "mug",
                    "attribute": "heavier",
                    "change": "more likely"
                },
                {
                    "type": "openpi_entity",
                    "entity": "mug",
                    "attribute": "lighter",
                    "change": "less likely"
                }
            ],
            [
                {
                    "type": "step",
                    "step": "Drink the hot tea carefully."
                },
                {
                    "type": "openpi_entity",
                    "entity": "tea",
                    "attribute": "in a mug",
                    "change": "more likely"
                },
                {
                    "type": "openpi_entity",
                    "entity": "tea",
                    "attribute": "in a pot",
                    "change": "less likely"
                },
                {
                    "type": "openpi_entity",
                    "entity": "mug",
                    "attribute": "hot",
                    "change": "more likely"
                },
                {
                    "type": "openpi_entity",
                    "entity": "mug",
                    "attribute": "room temperature",
                    "change": "less likely"
                },
                {
                    "type": "openpi_entity",
                    "entity": "mug",
                    "attribute": "on counter",
                    "change": "more likely"
                },
                {
                    "type": "openpi_entity",
                    "entity": "mug",
                    "attribute": "in cupboard",
                    "change": "less likely"
                },
                {
                    "type": "openpi_entity",
                    "entity": "person",
                    "attribute": "drinking tea",
                    "change": "more likely"
                },
                {
                    "type": "openpi_entity",
                    "entity": "person",
                    "attribute": "idle",
                    "change": "less likely"
                },
                {
                    "type": "openpi_entity",
                    "entity": "tea bag",
                    "attribute": "drank",
                    "change": "more likely"
                },
                {
                    "type": "openpi_entity",
                    "entity": "tea bag",
                    "attribute": "in hand",
                    "change": "less likely"
                }
            ]
        ]
    },
    "12": {
        "goal": "Install a game on PS5",
        "annotator": "Harry",
        "steps": [
            [
                {
                    "step": "Start."
                }
            ],
            [
                {
                    "type": "step",
                    "step": "Go to the Playstation store"
                },
                {
                    "type": "openpi_entity",
                    "entity": "person",
                    "attribute": "at the store",
                    "change": "more likely"
                },
                {
                    "type": "openpi_entity",
                    "entity": "person",
                    "attribute": "at home",
                    "change": "less likely"
                }
            ],
            [
                {
                    "type": "step",
                    "step": "Pick a game you like"
                },
                {
                    "type": "openpi_entity",
                    "entity": "game",
                    "attribute": "selected",
                    "change": "more likely"
                },
                {
                    "type": "openpi_entity",
                    "entity": "game",
                    "attribute": "unselected",
                    "change": "less likely"
                },
                {
                    "type": "openpi_entity",
                    "entity": "game",
                    "attribute": "purchased",
                    "change": "more likely"
                },
                {
                    "type": "openpi_entity",
                    "entity": "game",
                    "attribute": "unpurchased",
                    "change": "less likely"
                },
                {
                    "type": "openpi_entity",
                    "entity": "the game",
                    "attribute": "chosen",
                    "change": "more likely"
                },
                {
                    "type": "openpi_entity",
                    "entity": "the game",
                    "attribute": "unchosen",
                    "change": "less likely"
                }
            ],
            [
                {
                    "type": "step",
                    "step": "Add the game to the cart and provide payment information"
                },
                {
                    "type": "openpi_entity",
                    "entity": "game",
                    "attribute": "selected",
                    "change": "more likely"
                },
                {
                    "type": "openpi_entity",
                    "entity": "game",
                    "attribute": "unselected",
                    "change": "less likely"
                },
                {
                    "type": "openpi_entity",
                    "entity": "game",
                    "attribute": "at home",
                    "change": "more likely"
                },
                {
                    "type": "openpi_entity",
                    "entity": "game",
                    "attribute": "at the store",
                    "change": "less likely"
                },
                {
                    "type": "openpi_entity",
                    "entity": "game",
                    "attribute": "selected",
                    "change": "more likely"
                },
                {
                    "type": "openpi_entity",
                    "entity": "game",
                    "attribute": "unselected",
                    "change": "less likely"
                },
                {
                    "type": "openpi_entity",
                    "entity": "game",
                    "attribute": "purchased",
                    "change": "more likely"
                },
                {
                    "type": "openpi_entity",
                    "entity": "game",
                    "attribute": "unpurchased",
                    "change": "less likely"
                },
                {
                    "type": "openpi_entity",
                    "entity": "price",
                    "attribute": "known",
                    "change": "more likely"
                },
                {
                    "type": "openpi_entity",
                    "entity": "price",
                    "attribute": "unknown",
                    "change": "less likely"
                }
            ],
            [
                {
                    "type": "step",
                    "step": "Finish the purchase."
                },
                {
                    "type": "entity",
                    "entity": "game",
                    "attribute": "bought",
                    "change": "more likely"
                },
                {
                    "type": "multihop",
                    "event": "I can download and play the game.",
                    "change": "more likely"
                },
                {
                    "type": "openpi_entity",
                    "entity": "game",
                    "attribute": "finished",
                    "change": "more likely"
                },
                {
                    "type": "openpi_entity",
                    "entity": "game",
                    "attribute": "unfinished",
                    "change": "less likely"
                },
                {
                    "type": "openpi_entity",
                    "entity": "credit card",
                    "attribute": "loaded",
                    "change": "more likely"
                },
                {
                    "type": "openpi_entity",
                    "entity": "credit card",
                    "attribute": "inactive",
                    "change": "less likely"
                },
                {
                    "type": "openpi_entity",
                    "entity": "purchase",
                    "attribute": "made",
                    "change": "more likely"
                },
                {
                    "type": "openpi_entity",
                    "entity": "purchase",
                    "attribute": "unmade",
                    "change": "less likely"
                }
            ],
            [
                {
                    "type": "step",
                    "step": "Download and launch the game to start playing. "
                },
                {
                    "type": "entity",
                    "entity": "the game",
                    "attribute": "installed",
                    "change": "more likely"
                },
                {
                    "type": "multihop",
                    "event": "I run the game.",
                    "change": "more likely"
                },
                {
                    "type": "openpi_entity",
                    "entity": "game",
                    "attribute": "installed",
                    "change": "more likely"
                },
                {
                    "type": "openpi_entity",
                    "entity": "game",
                    "attribute": "uninstalled",
                    "change": "less likely"
                },
                {
                    "type": "openpi_entity",
                    "entity": "game",
                    "attribute": "installed",
                    "change": "more likely"
                },
                {
                    "type": "openpi_entity",
                    "entity": "game",
                    "attribute": "uninstalled",
                    "change": "less likely"
                },
                {
                    "type": "openpi_entity",
                    "entity": "game",
                    "attribute": "in hand",
                    "change": "more likely"
                },
                {
                    "type": "openpi_entity",
                    "entity": "game",
                    "attribute": "on shelf",
                    "change": "less likely"
                },
                {
                    "type": "openpi_entity",
                    "entity": "computer",
                    "attribute": "turned on",
                    "change": "more likely"
                },
                {
                    "type": "openpi_entity",
                    "entity": "computer",
                    "attribute": "turned off",
                    "change": "less likely"
                },
                {
                    "type": "openpi_entity",
                    "entity": "game",
                    "attribute": "off",
                    "change": "more likely"
                },
                {
                    "type": "openpi_entity",
                    "entity": "game",
                    "attribute": "on",
                    "change": "less likely"
                },
                {
                    "type": "openpi_entity",
                    "entity": "game",
                    "attribute": "downloaded",
                    "change": "more likely"
                },
                {
                    "type": "openpi_entity",
                    "entity": "game",
                    "attribute": "uninstalled",
                    "change": "less likely"
                }
            ]
        ]
    },
    "13": {
        "goal": "Schedule a virtual meeting",
        "annotator": "Harry",
        "steps": [
            [
                {
                    "step": "Start."
                }
            ],
            [
                {
                    "type": "step",
                    "step": "Decide on a topic and a list of meeting attendees."
                },
                {
                    "type": "openpi_entity",
                    "entity": "a topic",
                    "attribute": "decided",
                    "change": "more likely"
                },
                {
                    "type": "openpi_entity",
                    "entity": "a topic",
                    "attribute": "undecided",
                    "change": "less likely"
                },
                {
                    "type": "openpi_entity",
                    "entity": "topic",
                    "attribute": "defined",
                    "change": "more likely"
                },
                {
                    "type": "openpi_entity",
                    "entity": "topic",
                    "attribute": "undefined",
                    "change": "less likely"
                },
                {
                    "type": "openpi_entity",
                    "entity": "meeting topic",
                    "attribute": "selected",
                    "change": "more likely"
                },
                {
                    "type": "openpi_entity",
                    "entity": "meeting topic",
                    "attribute": "unselected",
                    "change": "less likely"
                },
                {
                    "type": "openpi_entity",
                    "entity": "a topic",
                    "attribute": "chosen",
                    "change": "more likely"
                },
                {
                    "type": "openpi_entity",
                    "entity": "a topic",
                    "attribute": "undecided",
                    "change": "less likely"
                },
                {
                    "type": "openpi_entity",
                    "entity": "a topic",
                    "attribute": "selected",
                    "change": "more likely"
                },
                {
                    "type": "openpi_entity",
                    "entity": "a topic",
                    "attribute": "unselected",
                    "change": "less likely"
                },
                {
                    "type": "openpi_entity",
                    "entity": "meetings",
                    "attribute": "clicked",
                    "change": "more likely"
                },
                {
                    "type": "openpi_entity",
                    "entity": "meetings",
                    "attribute": "unclicked",
                    "change": "less likely"
                }
            ],
            [
                {
                    "type": "step",
                    "step": "Reach out to the attendees to find a time that works."
                },
                {
                    "type": "entity",
                    "entity": "the attendees",
                    "attribute": "been notified of the meeting",
                    "change": "more likely"
                },
                {
                    "type": "multihop",
                    "event": "I expect that some people will show up.",
                    "change": "more likely"
                },
                {
                    "type": "openpi_entity",
                    "entity": "a meeting",
                    "attribute": "reached",
                    "change": "more likely"
                },
                {
                    "type": "openpi_entity",
                    "entity": "a meeting",
                    "attribute": "in progress",
                    "change": "less likely"
                },
                {
                    "type": "openpi_entity",
                    "entity": "meeting",
                    "attribute": "in progress",
                    "change": "more likely"
                },
                {
                    "type": "openpi_entity",
                    "entity": "meeting",
                    "attribute": "unstarted",
                    "change": "less likely"
                },
                {
                    "type": "openpi_entity",
                    "entity": "person",
                    "attribute": "reached out",
                    "change": "more likely"
                },
                {
                    "type": "openpi_entity",
                    "entity": "person",
                    "attribute": "ignored",
                    "change": "less likely"
                },
                {
                    "type": "openpi_entity",
                    "entity": "meeting",
                    "attribute": "selected",
                    "change": "more likely"
                },
                {
                    "type": "openpi_entity",
                    "entity": "meeting",
                    "attribute": "random",
                    "change": "less likely"
                },
                {
                    "type": "openpi_entity",
                    "entity": "meeting",
                    "attribute": "written down",
                    "change": "more likely"
                },
                {
                    "type": "openpi_entity",
                    "entity": "meeting",
                    "attribute": "thought of",
                    "change": "less likely"
                }
            ],
            [
                {
                    "type": "step",
                    "step": "Choose a virtual meeting application such as Zoom and schedule a meeting."
                },
                {
                    "type": "openpi_entity",
                    "entity": "meeting",
                    "attribute": "selected",
                    "change": "more likely"
                },
                {
                    "type": "openpi_entity",
                    "entity": "meeting",
                    "attribute": "considered",
                    "change": "less likely"
                },
                {
                    "type": "openpi_entity",
                    "entity": "meeting",
                    "attribute": "planned",
                    "change": "more likely"
                },
                {
                    "type": "openpi_entity",
                    "entity": "meeting",
                    "attribute": "unplanned",
                    "change": "less likely"
                },
                {
                    "type": "openpi_entity",
                    "entity": "virtual meeting application",
                    "attribute": "clicked",
                    "change": "more likely"
                },
                {
                    "type": "openpi_entity",
                    "entity": "virtual meeting application",
                    "attribute": "unclicked",
                    "change": "less likely"
                }
            ],
            [
                {
                    "type": "step",
                    "step": "Send the meeting information to everyone."
                },
                {
                    "type": "openpi_entity",
                    "entity": "meeting information",
                    "attribute": "added",
                    "change": "more likely"
                },
                {
                    "type": "openpi_entity",
                    "entity": "meeting information",
                    "attribute": "missing",
                    "change": "less likely"
                },
                {
                    "type": "openpi_entity",
                    "entity": "everyone",
                    "attribute": "aware",
                    "change": "more likely"
                },
                {
                    "type": "openpi_entity",
                    "entity": "everyone",
                    "attribute": "unaware of what to do",
                    "change": "less likely"
                },
                {
                    "type": "openpi_entity",
                    "entity": "meeting",
                    "attribute": "clicked",
                    "change": "more likely"
                },
                {
                    "type": "openpi_entity",
                    "entity": "meeting",
                    "attribute": "unclicked",
                    "change": "less likely"
                },
                {
                    "type": "openpi_entity",
                    "entity": "meeting",
                    "attribute": "in progress",
                    "change": "more likely"
                },
                {
                    "type": "openpi_entity",
                    "entity": "meeting",
                    "attribute": "unstarted",
                    "change": "less likely"
                }
            ],
            [
                {
                    "type": "step",
                    "step": "Send a reminder before the meeting."
                },
                {
                    "type": "openpi_entity",
                    "entity": "person",
                    "attribute": "holding the paper",
                    "change": "more likely"
                },
                {
                    "type": "openpi_entity",
                    "entity": "person",
                    "attribute": "holding the pen",
                    "change": "less likely"
                },
                {
                    "type": "openpi_entity",
                    "entity": "meeting",
                    "attribute": "finished",
                    "change": "more likely"
                },
                {
                    "type": "openpi_entity",
                    "entity": "meeting",
                    "attribute": "being planned",
                    "change": "less likely"
                },
                {
                    "type": "openpi_entity",
                    "entity": "note",
                    "attribute": "in hand",
                    "change": "more likely"
                },
                {
                    "type": "openpi_entity",
                    "entity": "note",
                    "attribute": "on pad",
                    "change": "less likely"
                },
                {
                    "type": "openpi_entity",
                    "entity": "paper",
                    "attribute": "lighter",
                    "change": "more likely"
                },
                {
                    "type": "openpi_entity",
                    "entity": "paper",
                    "attribute": "heavier",
                    "change": "less likely"
                },
                {
                    "type": "openpi_entity",
                    "entity": "meeting",
                    "attribute": "in progress",
                    "change": "more likely"
                },
                {
                    "type": "openpi_entity",
                    "entity": "meeting",
                    "attribute": "unstarted",
                    "change": "less likely"
                }
            ],
            [
                {
                    "type": "step",
                    "step": "Start meeting."
                },
                {
                    "type": "entity",
                    "entity": "the meeting",
                    "attribute": "started",
                    "change": "more likely"
                },
                {
                    "type": "multihop",
                    "event": "I cancel the meeting.",
                    "change": "less likely"
                },
                {
                    "type": "openpi_entity",
                    "entity": "meeting",
                    "attribute": "started",
                    "change": "more likely"
                },
                {
                    "type": "openpi_entity",
                    "entity": "meeting",
                    "attribute": "being planned",
                    "change": "less likely"
                },
                {
                    "type": "openpi_entity",
                    "entity": "meeting",
                    "attribute": "started",
                    "change": "more likely"
                },
                {
                    "type": "openpi_entity",
                    "entity": "meeting",
                    "attribute": "being planned",
                    "change": "less likely"
                },
                {
                    "type": "openpi_entity",
                    "entity": "person",
                    "attribute": "ready",
                    "change": "more likely"
                },
                {
                    "type": "openpi_entity",
                    "entity": "person",
                    "attribute": "waiting",
                    "change": "less likely"
                },
                {
                    "type": "openpi_entity",
                    "entity": "understanding",
                    "attribute": "present",
                    "change": "more likely"
                },
                {
                    "type": "openpi_entity",
                    "entity": "understanding",
                    "attribute": "absent",
                    "change": "less likely"
                }
            ]
        ]
    },
    "14": {
        "goal": "Make scrambled eggs",
        "annotator": "Harry",
        "steps": [
            [
                {
                    "step": "Start."
                }
            ],
            [
                {
                    "type": "step",
                    "step": "Pre-heat the pan with medium to high heat."
                },
                {
                    "type": "entity",
                    "entity": "the pan",
                    "attribute": "hot",
                    "change": "more likely"
                },
                {
                    "type": "multihop",
                    "event": "I touch the pan surface and get injured.",
                    "change": "more likely"
                },
                {
                    "type": "openpi_entity",
                    "entity": "stove",
                    "attribute": "on",
                    "change": "more likely"
                },
                {
                    "type": "openpi_entity",
                    "entity": "stove",
                    "attribute": "off",
                    "change": "less likely"
                },
                {
                    "type": "openpi_entity",
                    "entity": "pan",
                    "attribute": "hot",
                    "change": "more likely"
                },
                {
                    "type": "openpi_entity",
                    "entity": "pan",
                    "attribute": "cool",
                    "change": "less likely"
                },
                {
                    "type": "openpi_entity",
                    "entity": "oven",
                    "attribute": "hot",
                    "change": "more likely"
                },
                {
                    "type": "openpi_entity",
                    "entity": "oven",
                    "attribute": "cold",
                    "change": "less likely"
                },
                {
                    "type": "openpi_entity",
                    "entity": "stove",
                    "attribute": "hot",
                    "change": "more likely"
                },
                {
                    "type": "openpi_entity",
                    "entity": "stove",
                    "attribute": "cold",
                    "change": "less likely"
                },
                {
                    "type": "openpi_entity",
                    "entity": "stove dial",
                    "attribute": "turned",
                    "change": "more likely"
                },
                {
                    "type": "openpi_entity",
                    "entity": "stove dial",
                    "attribute": "unturned",
                    "change": "less likely"
                },
                {
                    "type": "openpi_entity",
                    "entity": "heat",
                    "attribute": "in pan",
                    "change": "more likely"
                },
                {
                    "type": "openpi_entity",
                    "entity": "heat",
                    "attribute": "absent",
                    "change": "less likely"
                },
                {
                    "type": "openpi_entity",
                    "entity": "pan",
                    "attribute": "preheated",
                    "change": "more likely"
                },
                {
                    "type": "openpi_entity",
                    "entity": "pan",
                    "attribute": "room temperature",
                    "change": "less likely"
                },
                {
                    "type": "openpi_entity",
                    "entity": "stove",
                    "attribute": "turned on",
                    "change": "more likely"
                },
                {
                    "type": "openpi_entity",
                    "entity": "stove",
                    "attribute": "turned off",
                    "change": "less likely"
                },
                {
                    "type": "openpi_entity",
                    "entity": "stove top",
                    "attribute": "hot",
                    "change": "more likely"
                },
                {
                    "type": "openpi_entity",
                    "entity": "stove top",
                    "attribute": "cold",
                    "change": "less likely"
                }
            ],
            [
                {
                    "type": "step",
                    "step": "Crack some eggs into a mixing bowl."
                },
                {
                    "type": "openpi_entity",
                    "entity": "bowl",
                    "attribute": "wet",
                    "change": "more likely"
                },
                {
                    "type": "openpi_entity",
                    "entity": "bowl",
                    "attribute": "dry",
                    "change": "less likely"
                },
                {
                    "type": "openpi_entity",
                    "entity": "bowl",
                    "attribute": "hot",
                    "change": "more likely"
                },
                {
                    "type": "openpi_entity",
                    "entity": "bowl",
                    "attribute": "room temperature",
                    "change": "less likely"
                },
                {
                    "type": "openpi_entity",
                    "entity": "water",
                    "attribute": "brown",
                    "change": "more likely"
                },
                {
                    "type": "openpi_entity",
                    "entity": "water",
                    "attribute": "clear",
                    "change": "less likely"
                },
                {
                    "type": "openpi_entity",
                    "entity": "bowl",
                    "attribute": "dirty",
                    "change": "more likely"
                },
                {
                    "type": "openpi_entity",
                    "entity": "bowl",
                    "attribute": "clean",
                    "change": "less likely"
                },
                {
                    "type": "openpi_entity",
                    "entity": "mixing bowl",
                    "attribute": "wet",
                    "change": "more likely"
                },
                {
                    "type": "openpi_entity",
                    "entity": "mixing bowl",
                    "attribute": "dry",
                    "change": "less likely"
                },
                {
                    "type": "openpi_entity",
                    "entity": "mixing bowl",
                    "attribute": "containing eggs and water",
                    "change": "more likely"
                },
                {
                    "type": "openpi_entity",
                    "entity": "mixing bowl",
                    "attribute": "empty",
                    "change": "less likely"
                },
                {
                    "type": "openpi_entity",
                    "entity": "egg",
                    "attribute": "in a bowl",
                    "change": "more likely"
                },
                {
                    "type": "openpi_entity",
                    "entity": "egg",
                    "attribute": "inside the shell",
                    "change": "less likely"
                },
                {
                    "type": "openpi_entity",
                    "entity": "bowl",
                    "attribute": "hot",
                    "change": "more likely"
                },
                {
                    "type": "openpi_entity",
                    "entity": "bowl",
                    "attribute": "room temperature",
                    "change": "less likely"
                }
            ],
            [
                {
                    "type": "step",
                    "step": "Whisk the eggs until the mixture has a consistent color. "
                },
                {
                    "type": "openpi_entity",
                    "entity": "bowl",
                    "attribute": "wet",
                    "change": "more likely"
                },
                {
                    "type": "openpi_entity",
                    "entity": "bowl",
                    "attribute": "dry",
                    "change": "less likely"
                },
                {
                    "type": "openpi_entity",
                    "entity": "mixture",
                    "attribute": "more consistent",
                    "change": "more likely"
                },
                {
                    "type": "openpi_entity",
                    "entity": "mixture",
                    "attribute": "less consistent",
                    "change": "less likely"
                },
                {
                    "type": "openpi_entity",
                    "entity": "bowl",
                    "attribute": "warm",
                    "change": "more likely"
                },
                {
                    "type": "openpi_entity",
                    "entity": "bowl",
                    "attribute": "cool",
                    "change": "less likely"
                },
                {
                    "type": "openpi_entity",
                    "entity": "mixture",
                    "attribute": "brown",
                    "change": "more likely"
                },
                {
                    "type": "openpi_entity",
                    "entity": "mixture",
                    "attribute": "white",
                    "change": "less likely"
                },
                {
                    "type": "openpi_entity",
                    "entity": "mixture",
                    "attribute": "smoother",
                    "change": "more likely"
                },
                {
                    "type": "openpi_entity",
                    "entity": "mixture",
                    "attribute": "chunky",
                    "change": "less likely"
                },
                {
                    "type": "openpi_entity",
                    "entity": "mixing bowl",
                    "attribute": "full",
                    "change": "more likely"
                },
                {
                    "type": "openpi_entity",
                    "entity": "mixing bowl",
                    "attribute": "empty",
                    "change": "less likely"
                },
                {
                    "type": "openpi_entity",
                    "entity": "liquid",
                    "attribute": "in glass",
                    "change": "more likely"
                },
                {
                    "type": "openpi_entity",
                    "entity": "liquid",
                    "attribute": "in bowl",
                    "change": "less likely"
                },
                {
                    "type": "openpi_entity",
                    "entity": "mix",
                    "attribute": "mixed",
                    "change": "more likely"
                },
                {
                    "type": "openpi_entity",
                    "entity": "mix",
                    "attribute": "unmixed",
                    "change": "less likely"
                },
                {
                    "type": "openpi_entity",
                    "entity": "mixture",
                    "attribute": "dark colored",
                    "change": "more likely"
                },
                {
                    "type": "openpi_entity",
                    "entity": "mixture",
                    "attribute": "light colored",
                    "change": "less likely"
                },
                {
                    "type": "openpi_entity",
                    "entity": "whisk",
                    "attribute": "dirty",
                    "change": "more likely"
                },
                {
                    "type": "openpi_entity",
                    "entity": "whisk",
                    "attribute": "clean",
                    "change": "less likely"
                },
                {
                    "type": "openpi_entity",
                    "entity": "mixture",
                    "attribute": "smooth",
                    "change": "more likely"
                },
                {
                    "type": "openpi_entity",
                    "entity": "mixture",
                    "attribute": "powdery",
                    "change": "less likely"
                }
            ],
            [
                {
                    "type": "step",
                    "step": "Add oil to the pan."
                },
                {
                    "type": "entity",
                    "entity": "the pan",
                    "attribute": "clean",
                    "change": "less likely"
                },
                {
                    "type": "multihop",
                    "event": "My hands get greasy if I touch the pan.",
                    "change": "more likely"
                },
                {
                    "type": "openpi_entity",
                    "entity": "bowl",
                    "attribute": "fuller",
                    "change": "more likely"
                },
                {
                    "type": "openpi_entity",
                    "entity": "bowl",
                    "attribute": "empty",
                    "change": "less likely"
                },
                {
                    "type": "openpi_entity",
                    "entity": "pan",
                    "attribute": "oily",
                    "change": "more likely"
                },
                {
                    "type": "openpi_entity",
                    "entity": "pan",
                    "attribute": "clean",
                    "change": "less likely"
                },
                {
                    "type": "openpi_entity",
                    "entity": "mixing bowl",
                    "attribute": "full",
                    "change": "more likely"
                },
                {
                    "type": "openpi_entity",
                    "entity": "mixing bowl",
                    "attribute": "empty",
                    "change": "less likely"
                },
                {
                    "type": "openpi_entity",
                    "entity": "oil",
                    "attribute": "in the bowl",
                    "change": "more likely"
                },
                {
                    "type": "openpi_entity",
                    "entity": "oil",
                    "attribute": "in the bottle",
                    "change": "less likely"
                },
                {
                    "type": "openpi_entity",
                    "entity": "oil",
                    "attribute": "in pan",
                    "change": "more likely"
                },
                {
                    "type": "openpi_entity",
                    "entity": "oil",
                    "attribute": "in container",
                    "change": "less likely"
                },
                {
                    "type": "openpi_entity",
                    "entity": "pan",
                    "attribute": "in use",
                    "change": "more likely"
                },
                {
                    "type": "openpi_entity",
                    "entity": "pan",
                    "attribute": "in storage",
                    "change": "less likely"
                },
                {
                    "type": "openpi_entity",
                    "entity": "the pan",
                    "attribute": "fuller",
                    "change": "more likely"
                },
                {
                    "type": "openpi_entity",
                    "entity": "the pan",
                    "attribute": "empty",
                    "change": "less likely"
                },
                {
                    "type": "openpi_entity",
                    "entity": "pan",
                    "attribute": "warm",
                    "change": "more likely"
                },
                {
                    "type": "openpi_entity",
                    "entity": "pan",
                    "attribute": "cool",
                    "change": "less likely"
                },
                {
                    "type": "openpi_entity",
                    "entity": "oil",
                    "attribute": "in the pan",
                    "change": "more likely"
                },
                {
                    "type": "openpi_entity",
                    "entity": "oil",
                    "attribute": "in a container",
                    "change": "less likely"
                },
                {
                    "type": "openpi_entity",
                    "entity": "the pan",
                    "attribute": "covered in oil",
                    "change": "more likely"
                },
                {
                    "type": "openpi_entity",
                    "entity": "the pan",
                    "attribute": "uncovered",
                    "change": "less likely"
                }
            ],
            [
                {
                    "type": "step",
                    "step": "Add the eggs to the pan."
                },
                {
                    "type": "entity",
                    "entity": "the eggs",
                    "attribute": "in the hot pan",
                    "change": "more likely"
                },
                {
                    "type": "multihop",
                    "event": "The eggs solidify.",
                    "change": "more likely"
                },
                {
                    "type": "openpi_entity",
                    "entity": "oil",
                    "attribute": "in pan",
                    "change": "more likely"
                },
                {
                    "type": "openpi_entity",
                    "entity": "oil",
                    "attribute": "in bottle",
                    "change": "less likely"
                },
                {
                    "type": "openpi_entity",
                    "entity": "pan",
                    "attribute": "wet",
                    "change": "more likely"
                },
                {
                    "type": "openpi_entity",
                    "entity": "pan",
                    "attribute": "dry",
                    "change": "less likely"
                },
                {
                    "type": "openpi_entity",
                    "entity": "egg mixture",
                    "attribute": "in the pan",
                    "change": "more likely"
                },
                {
                    "type": "openpi_entity",
                    "entity": "egg mixture",
                    "attribute": "in a bowl",
                    "change": "less likely"
                },
                {
                    "type": "openpi_entity",
                    "entity": "pan",
                    "attribute": "heavier",
                    "change": "more likely"
                },
                {
                    "type": "openpi_entity",
                    "entity": "pan",
                    "attribute": "lighter",
                    "change": "less likely"
                },
                {
                    "type": "openpi_entity",
                    "entity": "oil",
                    "attribute": "in the pan",
                    "change": "more likely"
                },
                {
                    "type": "openpi_entity",
                    "entity": "oil",
                    "attribute": "in the bottle",
                    "change": "less likely"
                },
                {
                    "type": "openpi_entity",
                    "entity": "egg mixture",
                    "attribute": "in pan",
                    "change": "more likely"
                },
                {
                    "type": "openpi_entity",
                    "entity": "egg mixture",
                    "attribute": "in bowl",
                    "change": "less likely"
                },
                {
                    "type": "openpi_entity",
                    "entity": "oil",
                    "attribute": "hotter",
                    "change": "more likely"
                },
                {
                    "type": "openpi_entity",
                    "entity": "oil",
                    "attribute": "cooler",
                    "change": "less likely"
                },
                {
                    "type": "openpi_entity",
                    "entity": "pan",
                    "attribute": "hot",
                    "change": "more likely"
                },
                {
                    "type": "openpi_entity",
                    "entity": "pan",
                    "attribute": "cold",
                    "change": "less likely"
                }
            ],
            [
                {
                    "type": "step",
                    "step": "Stir gently and frequently to separate the eggs."
                },
                {
                    "type": "multihop",
                    "event": "The eggs solidify.",
                    "change": "more likely"
                },
                {
                    "type": "openpi_entity",
                    "entity": "spoon",
                    "attribute": "dirty",
                    "change": "more likely"
                },
                {
                    "type": "openpi_entity",
                    "entity": "spoon",
                    "attribute": "clean",
                    "change": "less likely"
                },
                {
                    "type": "openpi_entity",
                    "entity": "spoon",
                    "attribute": "dirty",
                    "change": "more likely"
                },
                {
                    "type": "openpi_entity",
                    "entity": "spoon",
                    "attribute": "clean",
                    "change": "less likely"
                },
                {
                    "type": "openpi_entity",
                    "entity": "mixing bowl",
                    "attribute": "sticky",
                    "change": "more likely"
                },
                {
                    "type": "openpi_entity",
                    "entity": "mixing bowl",
                    "attribute": "clean",
                    "change": "less likely"
                },
                {
                    "type": "openpi_entity",
                    "entity": "whisk",
                    "attribute": "moving rapidly",
                    "change": "more likely"
                },
                {
                    "type": "openpi_entity",
                    "entity": "whisk",
                    "attribute": "still",
                    "change": "less likely"
                },
                {
                    "type": "openpi_entity",
                    "entity": "spoon",
                    "attribute": "wetter",
                    "change": "more likely"
                },
                {
                    "type": "openpi_entity",
                    "entity": "spoon",
                    "attribute": "dry",
                    "change": "less likely"
                },
                {
                    "type": "openpi_entity",
                    "entity": "mixing bowl",
                    "attribute": "full",
                    "change": "more likely"
                },
                {
                    "type": "openpi_entity",
                    "entity": "mixing bowl",
                    "attribute": "empty",
                    "change": "less likely"
                }
            ],
            [
                {
                    "type": "step",
                    "step": "Turn off the heat and serve the eggs."
                },
                {
                    "type": "entity",
                    "entity": "the eggs",
                    "attribute": "in the pan",
                    "change": "less likely"
                },
                {
                    "type": "multihop",
                    "event": "I start eating the eggs.",
                    "change": "more likely"
                },
                {
                    "type": "openpi_entity",
                    "entity": "mixture",
                    "attribute": "cooling",
                    "change": "more likely"
                },
                {
                    "type": "openpi_entity",
                    "entity": "mixture",
                    "attribute": "hot",
                    "change": "less likely"
                },
                {
                    "type": "openpi_entity",
                    "entity": "skillet",
                    "attribute": "on the countertop",
                    "change": "more likely"
                },
                {
                    "type": "openpi_entity",
                    "entity": "skillet",
                    "attribute": "in the cabinet",
                    "change": "less likely"
                },
                {
                    "type": "openpi_entity",
                    "entity": "serving spoon",
                    "attribute": "on the table",
                    "change": "more likely"
                },
                {
                    "type": "openpi_entity",
                    "entity": "serving spoon",
                    "attribute": "in the drawer",
                    "change": "less likely"
                },
                {
                    "type": "openpi_entity",
                    "entity": "egg",
                    "attribute": "now cool",
                    "change": "more likely"
                },
                {
                    "type": "openpi_entity",
                    "entity": "egg",
                    "attribute": "hot",
                    "change": "less likely"
                },
                {
                    "type": "openpi_entity",
                    "entity": "bowl",
                    "attribute": "on the countertop",
                    "change": "more likely"
                },
                {
                    "type": "openpi_entity",
                    "entity": "bowl",
                    "attribute": "in the cupboard",
                    "change": "less likely"
                }
            ]
        ]
    },
    "15": {
        "goal": "Eat at a restaurant in the US",
        "annotator": "Harry",
        "steps": [
            [
                {
                    "step": "Start"
                }
            ],
            [
                {
                    "type": "step",
                    "step": "Arrive at the resturant."
                },
                {
                    "type": "openpi_entity",
                    "entity": "rood",
                    "attribute": "at resturant",
                    "change": "more likely"
                },
                {
                    "type": "openpi_entity",
                    "entity": "rood",
                    "attribute": "at start of reuture",
                    "change": "less likely"
                },
                {
                    "type": "openpi_entity",
                    "entity": "the resturant",
                    "attribute": "ready to reuture",
                    "change": "more likely"
                },
                {
                    "type": "openpi_entity",
                    "entity": "the resturant",
                    "attribute": "needing repaired",
                    "change": "less likely"
                }
            ],
            [
                {
                    "type": "step",
                    "step": "Let the host know the size of your party and follow them to the table."
                },
                {
                    "type": "openpi_entity",
                    "entity": "player",
                    "attribute": "experienced",
                    "change": "more likely"
                },
                {
                    "type": "openpi_entity",
                    "entity": "player",
                    "attribute": "inexperienced",
                    "change": "less likely"
                },
                {
                    "type": "openpi_entity",
                    "entity": "arrival",
                    "attribute": "near",
                    "change": "more likely"
                },
                {
                    "type": "openpi_entity",
                    "entity": "arrival",
                    "attribute": "far away",
                    "change": "less likely"
                },
                {
                    "type": "openpi_entity",
                    "entity": "guests",
                    "attribute": "known",
                    "change": "more likely"
                },
                {
                    "type": "openpi_entity",
                    "entity": "guests",
                    "attribute": "unknown",
                    "change": "less likely"
                },
                {
                    "type": "openpi_entity",
                    "entity": "host",
                    "attribute": "followed",
                    "change": "more likely"
                },
                {
                    "type": "openpi_entity",
                    "entity": "host",
                    "attribute": "vague",
                    "change": "less likely"
                },
                {
                    "type": "openpi_entity",
                    "entity": "the host",
                    "attribute": "trained",
                    "change": "more likely"
                },
                {
                    "type": "openpi_entity",
                    "entity": "the host",
                    "attribute": "untrained",
                    "change": "less likely"
                }
            ],
            [
                {
                    "type": "step",
                    "step": "Order food and drinks."
                },
                {
                    "type": "entity",
                    "entity": "order",
                    "attribute": "placed",
                    "change": "more likely"
                },
                {
                    "type": "multihop",
                    "event": "I go home.",
                    "change": "less likely"
                },
                {
                    "type": "openpi_entity",
                    "entity": "body",
                    "attribute": "moving",
                    "change": "more likely"
                },
                {
                    "type": "openpi_entity",
                    "entity": "body",
                    "attribute": "frozen",
                    "change": "less likely"
                },
                {
                    "type": "openpi_entity",
                    "entity": "food",
                    "attribute": "in bowl",
                    "change": "more likely"
                },
                {
                    "type": "openpi_entity",
                    "entity": "food",
                    "attribute": "in fridge",
                    "change": "less likely"
                },
                {
                    "type": "openpi_entity",
                    "entity": "table",
                    "attribute": "full",
                    "change": "more likely"
                },
                {
                    "type": "openpi_entity",
                    "entity": "table",
                    "attribute": "empty",
                    "change": "less likely"
                },
                {
                    "type": "openpi_entity",
                    "entity": "bowl",
                    "attribute": "full",
                    "change": "more likely"
                },
                {
                    "type": "openpi_entity",
                    "entity": "bowl",
                    "attribute": "empty",
                    "change": "less likely"
                }
            ],
            [
                {
                    "type": "step",
                    "step": "Enjoy the food brought to the table."
                },
                {
                    "type": "entity",
                    "entity": "food",
                    "attribute": "on the table",
                    "change": "more likely"
                },
                {
                    "type": "multihop",
                    "event": "I eat.",
                    "change": "more likely"
                },
                {
                    "type": "openpi_entity",
                    "entity": "stomach",
                    "attribute": "full",
                    "change": "more likely"
                },
                {
                    "type": "openpi_entity",
                    "entity": "stomach",
                    "attribute": "empty",
                    "change": "less likely"
                },
                {
                    "type": "openpi_entity",
                    "entity": "orange peel",
                    "attribute": "owned by the person",
                    "change": "more likely"
                },
                {
                    "type": "openpi_entity",
                    "entity": "orange peel",
                    "attribute": "owned by the store",
                    "change": "less likely"
                },
                {
                    "type": "openpi_entity",
                    "entity": "mango",
                    "attribute": "on the plate",
                    "change": "more likely"
                },
                {
                    "type": "openpi_entity",
                    "entity": "mango",
                    "attribute": "in the fridge",
                    "change": "less likely"
                },
                {
                    "type": "openpi_entity",
                    "entity": "food",
                    "attribute": "tasty",
                    "change": "more likely"
                },
                {
                    "type": "openpi_entity",
                    "entity": "food",
                    "attribute": "bland",
                    "change": "less likely"
                },
                {
                    "type": "openpi_entity",
                    "entity": "pineapple",
                    "attribute": "on the plate",
                    "change": "more likely"
                },
                {
                    "type": "openpi_entity",
                    "entity": "pineapple",
                    "attribute": "in the fridge",
                    "change": "less likely"
                },
                {
                    "type": "openpi_entity",
                    "entity": "mayo",
                    "attribute": "on bowl",
                    "change": "more likely"
                },
                {
                    "type": "openpi_entity",
                    "entity": "mayo",
                    "attribute": "in jar",
                    "change": "less likely"
                },
                {
                    "type": "openpi_entity",
                    "entity": "bowl",
                    "attribute": "more full",
                    "change": "more likely"
                },
                {
                    "type": "openpi_entity",
                    "entity": "bowl",
                    "attribute": "empty",
                    "change": "less likely"
                },
                {
                    "type": "openpi_entity",
                    "entity": "host",
                    "attribute": "satisfied",
                    "change": "more likely"
                },
                {
                    "type": "openpi_entity",
                    "entity": "host",
                    "attribute": "hungry",
                    "change": "less likely"
                }
            ],
            [
                {
                    "type": "step",
                    "step": "Ask for the check when you're finished."
                },
                {
                    "type": "multihop",
                    "event": "I eat.",
                    "change": "less likely"
                },
                {
                    "type": "openpi_entity",
                    "entity": "task",
                    "attribute": "finished",
                    "change": "more likely"
                },
                {
                    "type": "openpi_entity",
                    "entity": "task",
                    "attribute": "unfinished",
                    "change": "less likely"
                },
                {
                    "type": "openpi_entity",
                    "entity": "food",
                    "attribute": "served",
                    "change": "more likely"
                },
                {
                    "type": "openpi_entity",
                    "entity": "food",
                    "attribute": "unserved",
                    "change": "less likely"
                },
                {
                    "type": "openpi_entity",
                    "entity": "task",
                    "attribute": "finished",
                    "change": "more likely"
                },
                {
                    "type": "openpi_entity",
                    "entity": "task",
                    "attribute": "unfinished",
                    "change": "less likely"
                },
                {
                    "type": "openpi_entity",
                    "entity": "fork",
                    "attribute": "in the serving dish",
                    "change": "more likely"
                },
                {
                    "type": "openpi_entity",
                    "entity": "fork",
                    "attribute": "in the drawer",
                    "change": "less likely"
                },
                {
                    "type": "openpi_entity",
                    "entity": "food",
                    "attribute": "eaten",
                    "change": "more likely"
                },
                {
                    "type": "openpi_entity",
                    "entity": "food",
                    "attribute": "ready to be served",
                    "change": "less likely"
                }
            ],
            [
                {
                    "type": "step",
                    "step": "Have the waiter clear off the table. "
                },
                {
                    "type": "entity",
                    "entity": "food",
                    "attribute": "on the table",
                    "change": "less likely"
                },
                {
                    "type": "multihop",
                    "event": "I eat.",
                    "change": "less likely"
                },
                {
                    "type": "openpi_entity",
                    "entity": "food",
                    "attribute": "in the garbage",
                    "change": "more likely"
                },
                {
                    "type": "openpi_entity",
                    "entity": "food",
                    "attribute": "on the table",
                    "change": "less likely"
                },
                {
                    "type": "openpi_entity",
                    "entity": "person",
                    "attribute": "cleared off",
                    "change": "more likely"
                },
                {
                    "type": "openpi_entity",
                    "entity": "person",
                    "attribute": "waiting",
                    "change": "less likely"
                },
                {
                    "type": "openpi_entity",
                    "entity": "table",
                    "attribute": "clean",
                    "change": "more likely"
                },
                {
                    "type": "openpi_entity",
                    "entity": "table",
                    "attribute": "dirty",
                    "change": "less likely"
                }
            ],
            [
                {
                    "type": "step",
                    "step": "Pay by cash or credit card."
                },
                {
                    "type": "entity",
                    "entity": "the check",
                    "attribute": "paid",
                    "change": "more likely"
                },
                {
                    "type": "multihop",
                    "event": "I go home.",
                    "change": "more likely"
                },
                {
                    "type": "openpi_entity",
                    "entity": "bill",
                    "attribute": "in traveler's bag",
                    "change": "more likely"
                },
                {
                    "type": "openpi_entity",
                    "entity": "bill",
                    "attribute": "in wallet",
                    "change": "less likely"
                },
                {
                    "type": "openpi_entity",
                    "entity": "credit card",
                    "attribute": "taken out",
                    "change": "more likely"
                },
                {
                    "type": "openpi_entity",
                    "entity": "credit card",
                    "attribute": "untouched",
                    "change": "less likely"
                },
                {
                    "type": "openpi_entity",
                    "entity": "food",
                    "attribute": "paid",
                    "change": "more likely"
                },
                {
                    "type": "openpi_entity",
                    "entity": "food",
                    "attribute": "unpaid",
                    "change": "less likely"
                },
                {
                    "type": "openpi_entity",
                    "entity": "cash",
                    "attribute": "in traveler's bag",
                    "change": "more likely"
                },
                {
                    "type": "openpi_entity",
                    "entity": "cash",
                    "attribute": "in wallet",
                    "change": "less likely"
                }
            ],
            [
                {
                    "type": "step",
                    "step": "Leave the restaurant."
                },
                {
                    "type": "openpi_entity",
                    "entity": "eater",
                    "attribute": "full",
                    "change": "more likely"
                },
                {
                    "type": "openpi_entity",
                    "entity": "eater",
                    "attribute": "hungry",
                    "change": "less likely"
                },
                {
                    "type": "openpi_entity",
                    "entity": "your food",
                    "attribute": "now leaving",
                    "change": "more likely"
                },
                {
                    "type": "openpi_entity",
                    "entity": "your food",
                    "attribute": "leaving",
                    "change": "less likely"
                },
                {
                    "type": "openpi_entity",
                    "entity": "eater",
                    "attribute": "gone",
                    "change": "more likely"
                },
                {
                    "type": "openpi_entity",
                    "entity": "eater",
                    "attribute": "at the restaurant",
                    "change": "less likely"
                },
                {
                    "type": "openpi_entity",
                    "entity": "guest",
                    "attribute": "outside",
                    "change": "more likely"
                },
                {
                    "type": "openpi_entity",
                    "entity": "guest",
                    "attribute": "inside",
                    "change": "less likely"
                }
            ]
        ]
    },
    "16": {
        "goal": "Wash Fruit and Vegetables",
        "annotator": "Shuyan",
        "steps": [
            [
                {
                    "step": "Start"
                }
            ],
            [
                {
                    "type": "step",
                    "step": "Prepare produce for washing"
                },
                {
                    "type": "openpi_entity",
                    "entity": "water",
                    "attribute": "in sink",
                    "change": "more likely"
                },
                {
                    "type": "openpi_entity",
                    "entity": "water",
                    "attribute": "in pipes",
                    "change": "less likely"
                },
                {
                    "type": "openpi_entity",
                    "entity": "washing machine",
                    "attribute": "on",
                    "change": "more likely"
                },
                {
                    "type": "openpi_entity",
                    "entity": "washing machine",
                    "attribute": "off",
                    "change": "less likely"
                },
                {
                    "type": "openpi_entity",
                    "entity": "washing machine",
                    "attribute": "turned on",
                    "change": "more likely"
                },
                {
                    "type": "openpi_entity",
                    "entity": "washing machine",
                    "attribute": "turned off",
                    "change": "less likely"
                }
            ],
            [
                {
                    "type": "step",
                    "step": "Wash your hands"
                },
                {
                    "type": "openpi_entity",
                    "entity": "water",
                    "attribute": "in washing machine",
                    "change": "more likely"
                },
                {
                    "type": "openpi_entity",
                    "entity": "water",
                    "attribute": "in pipes",
                    "change": "less likely"
                },
                {
                    "type": "openpi_entity",
                    "entity": "washing machine",
                    "attribute": "heavy",
                    "change": "more likely"
                },
                {
                    "type": "openpi_entity",
                    "entity": "washing machine",
                    "attribute": "light",
                    "change": "less likely"
                },
                {
                    "type": "openpi_entity",
                    "entity": "washing",
                    "attribute": "completed",
                    "change": "more likely"
                },
                {
                    "type": "openpi_entity",
                    "entity": "washing",
                    "attribute": "under way",
                    "change": "less likely"
                },
                {
                    "type": "openpi_entity",
                    "entity": "water",
                    "attribute": "in washing cloth",
                    "change": "more likely"
                },
                {
                    "type": "openpi_entity",
                    "entity": "water",
                    "attribute": "in pipes",
                    "change": "less likely"
                },
                {
                    "type": "openpi_entity",
                    "entity": "washing machine",
                    "attribute": "full",
                    "change": "more likely"
                },
                {
                    "type": "openpi_entity",
                    "entity": "washing machine",
                    "attribute": "empty",
                    "change": "less likely"
                },
                {
                    "type": "openpi_entity",
                    "entity": "soap",
                    "attribute": "in washing machine",
                    "change": "more likely"
                },
                {
                    "type": "openpi_entity",
                    "entity": "soap",
                    "attribute": "in bottle",
                    "change": "less likely"
                },
                {
                    "type": "openpi_entity",
                    "entity": "detergent",
                    "attribute": "in washing machine",
                    "change": "more likely"
                },
                {
                    "type": "openpi_entity",
                    "entity": "detergent",
                    "attribute": "in bottle",
                    "change": "less likely"
                }
            ],
            [
                {
                    "type": "step",
                    "step": "Cut away any damaged or bruised areas of your produce"
                },
                {
                    "type": "entity",
                    "entity": "produce",
                    "attribute": "containing harmful bacteria",
                    "change": "less likely"
                },
                {
                    "type": "multihop",
                    "event": "I eat the produce and get sick.",
                    "change": "less likely"
                },
                {
                    "type": "openpi_entity",
                    "entity": "tape",
                    "attribute": "on cloth",
                    "change": "more likely"
                },
                {
                    "type": "openpi_entity",
                    "entity": "tape",
                    "attribute": "on roll",
                    "change": "less likely"
                },
                {
                    "type": "openpi_entity",
                    "entity": "hand",
                    "attribute": "covered",
                    "change": "more likely"
                },
                {
                    "type": "openpi_entity",
                    "entity": "hand",
                    "attribute": "bare",
                    "change": "less likely"
                },
                {
                    "type": "openpi_entity",
                    "entity": "cloth",
                    "attribute": "wet",
                    "change": "more likely"
                },
                {
                    "type": "openpi_entity",
                    "entity": "cloth",
                    "attribute": "dry",
                    "change": "less likely"
                },
                {
                    "type": "openpi_entity",
                    "entity": "work area",
                    "attribute": "covered",
                    "change": "more likely"
                },
                {
                    "type": "openpi_entity",
                    "entity": "work area",
                    "attribute": "bare",
                    "change": "less likely"
                }
            ],
            [
                {
                    "type": "step",
                    "step": "Clean your countertop, cutting boards, and utensils."
                },
                {
                    "type": "openpi_entity",
                    "entity": "sewing machine",
                    "attribute": "dirty",
                    "change": "more likely"
                },
                {
                    "type": "openpi_entity",
                    "entity": "sewing machine",
                    "attribute": "clean",
                    "change": "less likely"
                },
                {
                    "type": "openpi_entity",
                    "entity": "tool",
                    "attribute": "in the counter",
                    "change": "more likely"
                },
                {
                    "type": "openpi_entity",
                    "entity": "tool",
                    "attribute": "in the toolbox",
                    "change": "less likely"
                },
                {
                    "type": "openpi_entity",
                    "entity": "countertop",
                    "attribute": "cleaner",
                    "change": "more likely"
                },
                {
                    "type": "openpi_entity",
                    "entity": "countertop",
                    "attribute": "dirty",
                    "change": "less likely"
                },
                {
                    "type": "openpi_entity",
                    "entity": "countertop",
                    "attribute": "clean",
                    "change": "more likely"
                },
                {
                    "type": "openpi_entity",
                    "entity": "countertop",
                    "attribute": "dirty",
                    "change": "less likely"
                },
                {
                    "type": "openpi_entity",
                    "entity": "cutting board",
                    "attribute": "clean",
                    "change": "more likely"
                },
                {
                    "type": "openpi_entity",
                    "entity": "cutting board",
                    "attribute": "dirty",
                    "change": "less likely"
                },
                {
                    "type": "openpi_entity",
                    "entity": "utensil",
                    "attribute": "clean",
                    "change": "more likely"
                },
                {
                    "type": "openpi_entity",
                    "entity": "utensil",
                    "attribute": "dirty",
                    "change": "less likely"
                },
                {
                    "type": "openpi_entity",
                    "entity": "counter",
                    "attribute": "wet",
                    "change": "more likely"
                },
                {
                    "type": "openpi_entity",
                    "entity": "counter",
                    "attribute": "dry",
                    "change": "less likely"
                },
                {
                    "type": "openpi_entity",
                    "entity": "wash cloth",
                    "attribute": "on the counter",
                    "change": "more likely"
                },
                {
                    "type": "openpi_entity",
                    "entity": "wash cloth",
                    "attribute": "in the sewing box",
                    "change": "less likely"
                },
                {
                    "type": "openpi_entity",
                    "entity": "washing cloth",
                    "attribute": "heavier",
                    "change": "more likely"
                },
                {
                    "type": "openpi_entity",
                    "entity": "washing cloth",
                    "attribute": "light",
                    "change": "less likely"
                },
                {
                    "type": "openpi_entity",
                    "entity": "cutting board",
                    "attribute": "wet",
                    "change": "more likely"
                },
                {
                    "type": "openpi_entity",
                    "entity": "cutting board",
                    "attribute": "dry",
                    "change": "less likely"
                },
                {
                    "type": "openpi_entity",
                    "entity": "board",
                    "attribute": "wet",
                    "change": "more likely"
                },
                {
                    "type": "openpi_entity",
                    "entity": "board",
                    "attribute": "dry",
                    "change": "less likely"
                }
            ],
            [
                {
                    "type": "step",
                    "step": "Rinse produce with cool or cold water"
                },
                {
                    "type": "entity",
                    "entity": "produce",
                    "attribute": "containing harmful bacteria",
                    "change": "less likely"
                },
                {
                    "type": "multihop",
                    "event": "I eat the produce and get sick.",
                    "change": "less likely"
                },
                {
                    "type": "openpi_entity",
                    "entity": "water",
                    "attribute": "in residue on the counter",
                    "change": "more likely"
                },
                {
                    "type": "openpi_entity",
                    "entity": "water",
                    "attribute": "in hose",
                    "change": "less likely"
                },
                {
                    "type": "openpi_entity",
                    "entity": "water",
                    "attribute": "in the bucket",
                    "change": "more likely"
                },
                {
                    "type": "openpi_entity",
                    "entity": "water",
                    "attribute": "in the pipes",
                    "change": "less likely"
                },
                {
                    "type": "openpi_entity",
                    "entity": "cool water",
                    "attribute": "in drain",
                    "change": "more likely"
                },
                {
                    "type": "openpi_entity",
                    "entity": "cool water",
                    "attribute": "in faucet",
                    "change": "less likely"
                },
                {
                    "type": "openpi_entity",
                    "entity": "countertop",
                    "attribute": "wet",
                    "change": "more likely"
                },
                {
                    "type": "openpi_entity",
                    "entity": "countertop",
                    "attribute": "dry",
                    "change": "less likely"
                },
                {
                    "type": "openpi_entity",
                    "entity": "countertop",
                    "attribute": "clean",
                    "change": "more likely"
                },
                {
                    "type": "openpi_entity",
                    "entity": "countertop",
                    "attribute": "dirty",
                    "change": "less likely"
                },
                {
                    "type": "openpi_entity",
                    "entity": "mix",
                    "attribute": "warm",
                    "change": "more likely"
                },
                {
                    "type": "openpi_entity",
                    "entity": "mix",
                    "attribute": "soapy",
                    "change": "less likely"
                },
                {
                    "type": "openpi_entity",
                    "entity": "mix",
                    "attribute": "warm",
                    "change": "more likely"
                },
                {
                    "type": "openpi_entity",
                    "entity": "mix",
                    "attribute": "soapy",
                    "change": "less likely"
                },
                {
                    "type": "openpi_entity",
                    "entity": "salt",
                    "attribute": "in bucket",
                    "change": "more likely"
                },
                {
                    "type": "openpi_entity",
                    "entity": "salt",
                    "attribute": "in carton",
                    "change": "less likely"
                }
            ],
            [
                {
                    "type": "step",
                    "step": "Scrub any produce with a thick skin"
                },
                {
                    "type": "entity",
                    "entity": "produce",
                    "attribute": "containing harmful bacteria",
                    "change": "less likely"
                },
                {
                    "type": "multihop",
                    "event": "I eat the produce and get sick.",
                    "change": "less likely"
                },
                {
                    "type": "openpi_entity",
                    "entity": "rag",
                    "attribute": "wet",
                    "change": "more likely"
                },
                {
                    "type": "openpi_entity",
                    "entity": "rag",
                    "attribute": "dry",
                    "change": "less likely"
                },
                {
                    "type": "openpi_entity",
                    "entity": "water",
                    "attribute": "on the soap",
                    "change": "more likely"
                },
                {
                    "type": "openpi_entity",
                    "entity": "water",
                    "attribute": "in pipes",
                    "change": "less likely"
                },
                {
                    "type": "openpi_entity",
                    "entity": "soap",
                    "attribute": "dry",
                    "change": "more likely"
                },
                {
                    "type": "openpi_entity",
                    "entity": "soap",
                    "attribute": "wet",
                    "change": "less likely"
                },
                {
                    "type": "openpi_entity",
                    "entity": "soap",
                    "attribute": "rinsed of water",
                    "change": "more likely"
                },
                {
                    "type": "openpi_entity",
                    "entity": "soap",
                    "attribute": "soapy",
                    "change": "less likely"
                },
                {
                    "type": "openpi_entity",
                    "entity": "dirt",
                    "attribute": "on the soap",
                    "change": "more likely"
                },
                {
                    "type": "openpi_entity",
                    "entity": "dirt",
                    "attribute": "on the countertop",
                    "change": "less likely"
                },
                {
                    "type": "openpi_entity",
                    "entity": "finish",
                    "attribute": "clean",
                    "change": "more likely"
                },
                {
                    "type": "openpi_entity",
                    "entity": "finish",
                    "attribute": "dirty",
                    "change": "less likely"
                },
                {
                    "type": "openpi_entity",
                    "entity": "produce",
                    "attribute": "clean",
                    "change": "more likely"
                },
                {
                    "type": "openpi_entity",
                    "entity": "produce",
                    "attribute": "dirty",
                    "change": "less likely"
                },
                {
                    "type": "openpi_entity",
                    "entity": "can",
                    "attribute": "open",
                    "change": "more likely"
                },
                {
                    "type": "openpi_entity",
                    "entity": "can",
                    "attribute": "closed",
                    "change": "less likely"
                },
                {
                    "type": "openpi_entity",
                    "entity": "produce",
                    "attribute": "soapy",
                    "change": "more likely"
                },
                {
                    "type": "openpi_entity",
                    "entity": "produce",
                    "attribute": "neutral smelling",
                    "change": "less likely"
                }
            ],
            [
                {
                    "type": "step",
                    "step": "Dry produce after washing."
                },
                {
                    "type": "openpi_entity",
                    "entity": "countertop",
                    "attribute": "moist",
                    "change": "more likely"
                },
                {
                    "type": "openpi_entity",
                    "entity": "countertop",
                    "attribute": "dry",
                    "change": "less likely"
                },
                {
                    "type": "openpi_entity",
                    "entity": "plant",
                    "attribute": "dry",
                    "change": "more likely"
                },
                {
                    "type": "openpi_entity",
                    "entity": "plant",
                    "attribute": "wet",
                    "change": "less likely"
                },
                {
                    "type": "openpi_entity",
                    "entity": "plant",
                    "attribute": "wet",
                    "change": "more likely"
                },
                {
                    "type": "openpi_entity",
                    "entity": "plant",
                    "attribute": "dry",
                    "change": "less likely"
                },
                {
                    "type": "openpi_entity",
                    "entity": "hand",
                    "attribute": "clean",
                    "change": "more likely"
                },
                {
                    "type": "openpi_entity",
                    "entity": "hand",
                    "attribute": "dirty",
                    "change": "less likely"
                },
                {
                    "type": "openpi_entity",
                    "entity": "soap",
                    "attribute": "on the countertop",
                    "change": "more likely"
                },
                {
                    "type": "openpi_entity",
                    "entity": "soap",
                    "attribute": "in a container",
                    "change": "less likely"
                },
                {
                    "type": "openpi_entity",
                    "entity": "water",
                    "attribute": "on the countertop",
                    "change": "more likely"
                },
                {
                    "type": "openpi_entity",
                    "entity": "water",
                    "attribute": "in the faucet",
                    "change": "less likely"
                },
                {
                    "type": "openpi_entity",
                    "entity": "product",
                    "attribute": "dry",
                    "change": "more likely"
                },
                {
                    "type": "openpi_entity",
                    "entity": "product",
                    "attribute": "wet",
                    "change": "less likely"
                },
                {
                    "type": "openpi_entity",
                    "entity": "soap",
                    "attribute": "on the countertop",
                    "change": "more likely"
                },
                {
                    "type": "openpi_entity",
                    "entity": "soap",
                    "attribute": "in a bottle",
                    "change": "less likely"
                },
                {
                    "type": "openpi_entity",
                    "entity": "water",
                    "attribute": "on the countertop",
                    "change": "more likely"
                },
                {
                    "type": "openpi_entity",
                    "entity": "water",
                    "attribute": "in the bucket",
                    "change": "less likely"
                }
            ]
        ]
    },
    "18": {
        "goal": "Store Sweet Potato Pie",
        "annotator": "Shuyan",
        "steps": [
            [
                {
                    "step": "Start"
                }
            ],
            [
                {
                    "type": "step",
                    "step": "Let the pie cool completely on a wire rack."
                },
                {
                    "type": "openpi_entity",
                    "entity": "wire rack",
                    "attribute": "cool",
                    "change": "more likely"
                },
                {
                    "type": "openpi_entity",
                    "entity": "wire rack",
                    "attribute": "room temperature",
                    "change": "less likely"
                },
                {
                    "type": "openpi_entity",
                    "entity": "wire rack",
                    "attribute": "full",
                    "change": "more likely"
                },
                {
                    "type": "openpi_entity",
                    "entity": "wire rack",
                    "attribute": "empty",
                    "change": "less likely"
                },
                {
                    "type": "openpi_entity",
                    "entity": "microwave",
                    "attribute": "on",
                    "change": "more likely"
                },
                {
                    "type": "openpi_entity",
                    "entity": "microwave",
                    "attribute": "off",
                    "change": "less likely"
                },
                {
                    "type": "openpi_entity",
                    "entity": "wire rack",
                    "attribute": "warming",
                    "change": "more likely"
                },
                {
                    "type": "openpi_entity",
                    "entity": "wire rack",
                    "attribute": "cold",
                    "change": "less likely"
                },
                {
                    "type": "openpi_entity",
                    "entity": "wire rack",
                    "attribute": "cool",
                    "change": "more likely"
                },
                {
                    "type": "openpi_entity",
                    "entity": "wire rack",
                    "attribute": "warm",
                    "change": "less likely"
                },
                {
                    "type": "openpi_entity",
                    "entity": "pie",
                    "attribute": "on counter",
                    "change": "more likely"
                },
                {
                    "type": "openpi_entity",
                    "entity": "pie",
                    "attribute": "on wire rack",
                    "change": "less likely"
                },
                {
                    "type": "openpi_entity",
                    "entity": "pie",
                    "attribute": "cool",
                    "change": "more likely"
                },
                {
                    "type": "openpi_entity",
                    "entity": "pie",
                    "attribute": "room temperature",
                    "change": "less likely"
                }
            ],
            [
                {
                    "type": "step",
                    "step": "Wrap the pie pan in plastic wrap to make it air-tight."
                },
                {
                    "type": "entity",
                    "entity": "pie",
                    "attribute": "wrapped",
                    "change": "more likely"
                },
                {
                    "type": "multihop",
                    "event": "I eat the pie",
                    "change": "less likely"
                },
                {
                    "type": "openpi_entity",
                    "entity": "plastic wrap",
                    "attribute": "open",
                    "change": "more likely"
                },
                {
                    "type": "openpi_entity",
                    "entity": "plastic wrap",
                    "attribute": "closed",
                    "change": "less likely"
                },
                {
                    "type": "openpi_entity",
                    "entity": "plastic wrap",
                    "attribute": "on pie pan",
                    "change": "more likely"
                },
                {
                    "type": "openpi_entity",
                    "entity": "plastic wrap",
                    "attribute": "on roll",
                    "change": "less likely"
                },
                {
                    "type": "openpi_entity",
                    "entity": "wire",
                    "attribute": "wrapped around pie pan",
                    "change": "more likely"
                },
                {
                    "type": "openpi_entity",
                    "entity": "wire",
                    "attribute": "balled up",
                    "change": "less likely"
                },
                {
                    "type": "openpi_entity",
                    "entity": "plastic wrap container",
                    "attribute": "empty",
                    "change": "more likely"
                },
                {
                    "type": "openpi_entity",
                    "entity": "plastic wrap container",
                    "attribute": "full",
                    "change": "less likely"
                },
                {
                    "type": "openpi_entity",
                    "entity": "pie pan",
                    "attribute": "wrapped",
                    "change": "more likely"
                },
                {
                    "type": "openpi_entity",
                    "entity": "pie pan",
                    "attribute": "bare",
                    "change": "less likely"
                },
                {
                    "type": "openpi_entity",
                    "entity": "pie pan",
                    "attribute": "wrapped",
                    "change": "more likely"
                },
                {
                    "type": "openpi_entity",
                    "entity": "pie pan",
                    "attribute": "ungathered",
                    "change": "less likely"
                },
                {
                    "type": "openpi_entity",
                    "entity": "pan",
                    "attribute": "covered",
                    "change": "more likely"
                },
                {
                    "type": "openpi_entity",
                    "entity": "pan",
                    "attribute": "open",
                    "change": "less likely"
                },
                {
                    "type": "openpi_entity",
                    "entity": "plastic wrap",
                    "attribute": "around pie pan",
                    "change": "more likely"
                },
                {
                    "type": "openpi_entity",
                    "entity": "plastic wrap",
                    "attribute": "on roll",
                    "change": "less likely"
                },
                {
                    "type": "openpi_entity",
                    "entity": "wire rack",
                    "attribute": "wrapped",
                    "change": "more likely"
                },
                {
                    "type": "openpi_entity",
                    "entity": "wire rack",
                    "attribute": "bare",
                    "change": "less likely"
                }
            ],
            [
                {
                    "type": "step",
                    "step": "Put a layer of foil around the outside of the pie pan."
                },
                {
                    "type": "openpi_entity",
                    "entity": "plastic wrap",
                    "attribute": "open",
                    "change": "more likely"
                },
                {
                    "type": "openpi_entity",
                    "entity": "plastic wrap",
                    "attribute": "closed",
                    "change": "less likely"
                },
                {
                    "type": "openpi_entity",
                    "entity": "pie pan",
                    "attribute": "wrapped",
                    "change": "more likely"
                },
                {
                    "type": "openpi_entity",
                    "entity": "pie pan",
                    "attribute": "bare",
                    "change": "less likely"
                },
                {
                    "type": "openpi_entity",
                    "entity": "pie pan",
                    "attribute": "covered with foil",
                    "change": "more likely"
                },
                {
                    "type": "openpi_entity",
                    "entity": "pie pan",
                    "attribute": "bare",
                    "change": "less likely"
                },
                {
                    "type": "openpi_entity",
                    "entity": "pie pan",
                    "attribute": "covered",
                    "change": "more likely"
                },
                {
                    "type": "openpi_entity",
                    "entity": "pie pan",
                    "attribute": "open",
                    "change": "less likely"
                },
                {
                    "type": "openpi_entity",
                    "entity": "foil",
                    "attribute": "on pie pan",
                    "change": "more likely"
                },
                {
                    "type": "openpi_entity",
                    "entity": "foil",
                    "attribute": "in box",
                    "change": "less likely"
                },
                {
                    "type": "openpi_entity",
                    "entity": "foil",
                    "attribute": "wrapped",
                    "change": "more likely"
                },
                {
                    "type": "openpi_entity",
                    "entity": "foil",
                    "attribute": "flat",
                    "change": "less likely"
                },
                {
                    "type": "openpi_entity",
                    "entity": "foil",
                    "attribute": "around pie pan",
                    "change": "more likely"
                },
                {
                    "type": "openpi_entity",
                    "entity": "foil",
                    "attribute": "on roll",
                    "change": "less likely"
                }
            ],
            [
                {
                    "type": "step",
                    "step": "Keep the pie in the freezer for up to 1 month"
                },
                {
                    "type": "entity",
                    "entity": "the pie",
                    "attribute": "frozen",
                    "change": "more likely"
                },
                {
                    "type": "multihop",
                    "event": "The pie is rock hard.",
                    "change": "more likely"
                },
                {
                    "type": "openpi_entity",
                    "entity": "freezer door",
                    "attribute": "open",
                    "change": "more likely"
                },
                {
                    "type": "openpi_entity",
                    "entity": "freezer door",
                    "attribute": "closed",
                    "change": "less likely"
                },
                {
                    "type": "openpi_entity",
                    "entity": "pie pan",
                    "attribute": "on the table",
                    "change": "more likely"
                },
                {
                    "type": "openpi_entity",
                    "entity": "pie pan",
                    "attribute": "in the pantry",
                    "change": "less likely"
                },
                {
                    "type": "openpi_entity",
                    "entity": "pie",
                    "attribute": "warm",
                    "change": "more likely"
                },
                {
                    "type": "openpi_entity",
                    "entity": "pie",
                    "attribute": "cold",
                    "change": "less likely"
                },
                {
                    "type": "openpi_entity",
                    "entity": "pie pan",
                    "attribute": "in freezer",
                    "change": "more likely"
                },
                {
                    "type": "openpi_entity",
                    "entity": "pie pan",
                    "attribute": "on counter",
                    "change": "less likely"
                },
                {
                    "type": "openpi_entity",
                    "entity": "pie",
                    "attribute": "is thawed",
                    "change": "more likely"
                },
                {
                    "type": "openpi_entity",
                    "entity": "pie",
                    "attribute": "frozen",
                    "change": "less likely"
                },
                {
                    "type": "openpi_entity",
                    "entity": "pie",
                    "attribute": "cold",
                    "change": "more likely"
                },
                {
                    "type": "openpi_entity",
                    "entity": "pie",
                    "attribute": "room temperature",
                    "change": "less likely"
                },
                {
                    "type": "openpi_entity",
                    "entity": "freezer",
                    "attribute": "more full",
                    "change": "more likely"
                },
                {
                    "type": "openpi_entity",
                    "entity": "freezer",
                    "attribute": "less full",
                    "change": "less likely"
                }
            ]
        ]
    },
    "19": {
        "goal": "Store Fresh Mushrooms",
        "annotator": "Shuyan",
        "steps": [
            [
                {
                    "step": "Start"
                }
            ],
            [
                {
                    "type": "step",
                    "step": "Clean the mushrooms first"
                },
                {
                    "type": "entity",
                    "entity": "the mushrooms",
                    "attribute": "clean",
                    "change": "more likely"
                },
                {
                    "type": "openpi_entity",
                    "entity": "mushroom",
                    "attribute": "clean",
                    "change": "more likely"
                },
                {
                    "type": "openpi_entity",
                    "entity": "mushroom",
                    "attribute": "dirty",
                    "change": "less likely"
                },
                {
                    "type": "openpi_entity",
                    "entity": "mushroom",
                    "attribute": "on counter",
                    "change": "more likely"
                },
                {
                    "type": "openpi_entity",
                    "entity": "mushroom",
                    "attribute": "in packet",
                    "change": "less likely"
                },
                {
                    "type": "openpi_entity",
                    "entity": "mushroom",
                    "attribute": "clean",
                    "change": "more likely"
                },
                {
                    "type": "openpi_entity",
                    "entity": "mushroom",
                    "attribute": "dirty",
                    "change": "less likely"
                },
                {
                    "type": "openpi_entity",
                    "entity": "mushroom",
                    "attribute": "clean",
                    "change": "more likely"
                },
                {
                    "type": "openpi_entity",
                    "entity": "mushroom",
                    "attribute": "covered in black stuff",
                    "change": "less likely"
                },
                {
                    "type": "openpi_entity",
                    "entity": "mushroom",
                    "attribute": "dead",
                    "change": "more likely"
                },
                {
                    "type": "openpi_entity",
                    "entity": "mushroom",
                    "attribute": "alive",
                    "change": "less likely"
                },
                {
                    "type": "openpi_entity",
                    "entity": "mushroom",
                    "attribute": "mushy",
                    "change": "more likely"
                },
                {
                    "type": "openpi_entity",
                    "entity": "mushroom",
                    "attribute": "solid",
                    "change": "less likely"
                },
                {
                    "type": "openpi_entity",
                    "entity": "mushroom",
                    "attribute": "covered",
                    "change": "more likely"
                },
                {
                    "type": "openpi_entity",
                    "entity": "mushroom",
                    "attribute": "exposed",
                    "change": "less likely"
                },
                {
                    "type": "openpi_entity",
                    "entity": "cap",
                    "attribute": "off mushroom",
                    "change": "more likely"
                },
                {
                    "type": "openpi_entity",
                    "entity": "cap",
                    "attribute": "on mushroom",
                    "change": "less likely"
                }
            ],
            [
                {
                    "type": "step",
                    "step": "Brush with towel or mushroom brush"
                },
                {
                    "type": "entity",
                    "entity": "the mushrooms",
                    "attribute": "clean",
                    "change": "more likely"
                },
                {
                    "type": "openpi_entity",
                    "entity": "brush",
                    "attribute": "full of mushroom",
                    "change": "more likely"
                },
                {
                    "type": "openpi_entity",
                    "entity": "brush",
                    "attribute": "empty",
                    "change": "less likely"
                },
                {
                    "type": "openpi_entity",
                    "entity": "mushroom brush",
                    "attribute": "dirty",
                    "change": "more likely"
                },
                {
                    "type": "openpi_entity",
                    "entity": "mushroom brush",
                    "attribute": "clean",
                    "change": "less likely"
                },
                {
                    "type": "openpi_entity",
                    "entity": "brush",
                    "attribute": "on the mushroom",
                    "change": "more likely"
                },
                {
                    "type": "openpi_entity",
                    "entity": "brush",
                    "attribute": "off the mushroom",
                    "change": "less likely"
                },
                {
                    "type": "openpi_entity",
                    "entity": "mushroom",
                    "attribute": "clean",
                    "change": "more likely"
                },
                {
                    "type": "openpi_entity",
                    "entity": "mushroom",
                    "attribute": "dirty",
                    "change": "less likely"
                },
                {
                    "type": "openpi_entity",
                    "entity": "towel or mushroom brush",
                    "attribute": "full",
                    "change": "more likely"
                },
                {
                    "type": "openpi_entity",
                    "entity": "towel or mushroom brush",
                    "attribute": "empty",
                    "change": "less likely"
                },
                {
                    "type": "openpi_entity",
                    "entity": "mushroom",
                    "attribute": "cleaner",
                    "change": "more likely"
                },
                {
                    "type": "openpi_entity",
                    "entity": "mushroom",
                    "attribute": "dirty",
                    "change": "less likely"
                },
                {
                    "type": "openpi_entity",
                    "entity": "brush",
                    "attribute": "full of mushroom",
                    "change": "more likely"
                },
                {
                    "type": "openpi_entity",
                    "entity": "brush",
                    "attribute": "empty",
                    "change": "less likely"
                },
                {
                    "type": "openpi_entity",
                    "entity": "mushroom",
                    "attribute": "in hand",
                    "change": "more likely"
                },
                {
                    "type": "openpi_entity",
                    "entity": "mushroom",
                    "attribute": "on counter",
                    "change": "less likely"
                },
                {
                    "type": "openpi_entity",
                    "entity": "the mushroom",
                    "attribute": "brushing",
                    "change": "more likely"
                },
                {
                    "type": "openpi_entity",
                    "entity": "the mushroom",
                    "attribute": "covered in dirt",
                    "change": "less likely"
                },
                {
                    "type": "openpi_entity",
                    "entity": "mushroom",
                    "attribute": "in the hand",
                    "change": "more likely"
                },
                {
                    "type": "openpi_entity",
                    "entity": "mushroom",
                    "attribute": "in the fridge",
                    "change": "less likely"
                }
            ],
            [
                {
                    "type": "step",
                    "step": "Slice and saute the mushrooms."
                },
                {
                    "type": "entity",
                    "entity": "the mushrooms",
                    "attribute": "hot",
                    "change": "more likely"
                },
                {
                    "type": "entity",
                    "entity": "the mushroom",
                    "attribute": "cooked",
                    "change": "more likely"
                },
                {
                    "type": "multihop",
                    "event": "I eat the mushrooms safely.",
                    "change": "more likely"
                },
                {
                    "type": "openpi_entity",
                    "entity": "brush",
                    "attribute": "dirty",
                    "change": "more likely"
                },
                {
                    "type": "openpi_entity",
                    "entity": "brush",
                    "attribute": "clean",
                    "change": "less likely"
                },
                {
                    "type": "openpi_entity",
                    "entity": "knife",
                    "attribute": "wet",
                    "change": "more likely"
                },
                {
                    "type": "openpi_entity",
                    "entity": "knife",
                    "attribute": "dry",
                    "change": "less likely"
                },
                {
                    "type": "openpi_entity",
                    "entity": "mushroom",
                    "attribute": "sliced",
                    "change": "more likely"
                },
                {
                    "type": "openpi_entity",
                    "entity": "mushroom",
                    "attribute": "whole",
                    "change": "less likely"
                },
                {
                    "type": "openpi_entity",
                    "entity": "mushroom",
                    "attribute": "on counter",
                    "change": "more likely"
                },
                {
                    "type": "openpi_entity",
                    "entity": "mushroom",
                    "attribute": "in package",
                    "change": "less likely"
                },
                {
                    "type": "openpi_entity",
                    "entity": "mushroom",
                    "attribute": "clean",
                    "change": "more likely"
                },
                {
                    "type": "openpi_entity",
                    "entity": "mushroom",
                    "attribute": "dirty",
                    "change": "less likely"
                },
                {
                    "type": "openpi_entity",
                    "entity": "cutting board",
                    "attribute": "wet",
                    "change": "more likely"
                },
                {
                    "type": "openpi_entity",
                    "entity": "cutting board",
                    "attribute": "dry",
                    "change": "less likely"
                },
                {
                    "type": "openpi_entity",
                    "entity": "mushroom",
                    "attribute": "sliced",
                    "change": "more likely"
                },
                {
                    "type": "openpi_entity",
                    "entity": "mushroom",
                    "attribute": "whole",
                    "change": "less likely"
                },
                {
                    "type": "openpi_entity",
                    "entity": "mushroom",
                    "attribute": "cut",
                    "change": "more likely"
                },
                {
                    "type": "openpi_entity",
                    "entity": "mushroom",
                    "attribute": "uncut",
                    "change": "less likely"
                },
                {
                    "type": "openpi_entity",
                    "entity": "grinder",
                    "attribute": "dirty",
                    "change": "more likely"
                },
                {
                    "type": "openpi_entity",
                    "entity": "grinder",
                    "attribute": "clean",
                    "change": "less likely"
                },
                {
                    "type": "openpi_entity",
                    "entity": "mushroom",
                    "attribute": "sliced",
                    "change": "more likely"
                },
                {
                    "type": "openpi_entity",
                    "entity": "mushroom",
                    "attribute": "whole",
                    "change": "less likely"
                }
            ],
            [
                {
                    "type": "step",
                    "step": "Let the mushrooms cool"
                },
                {
                    "type": "entity",
                    "entity": "the mushrooms",
                    "attribute": "hot",
                    "change": "less likely"
                },
                {
                    "type": "openpi_entity",
                    "entity": "mushroom",
                    "attribute": "frozen",
                    "change": "more likely"
                },
                {
                    "type": "openpi_entity",
                    "entity": "mushroom",
                    "attribute": "fresh",
                    "change": "less likely"
                },
                {
                    "type": "openpi_entity",
                    "entity": "mushroom",
                    "attribute": "soft",
                    "change": "more likely"
                },
                {
                    "type": "openpi_entity",
                    "entity": "mushroom",
                    "attribute": "hard",
                    "change": "less likely"
                },
                {
                    "type": "openpi_entity",
                    "entity": "mushroom",
                    "attribute": "soft",
                    "change": "more likely"
                },
                {
                    "type": "openpi_entity",
                    "entity": "mushroom",
                    "attribute": "hard",
                    "change": "less likely"
                },
                {
                    "type": "openpi_entity",
                    "entity": "microwave",
                    "attribute": "turned on",
                    "change": "more likely"
                },
                {
                    "type": "openpi_entity",
                    "entity": "microwave",
                    "attribute": "turned off",
                    "change": "less likely"
                },
                {
                    "type": "openpi_entity",
                    "entity": "mushroom",
                    "attribute": "cooked",
                    "change": "more likely"
                },
                {
                    "type": "openpi_entity",
                    "entity": "mushroom",
                    "attribute": "raw",
                    "change": "less likely"
                },
                {
                    "type": "openpi_entity",
                    "entity": "mushroom",
                    "attribute": "cool",
                    "change": "more likely"
                },
                {
                    "type": "openpi_entity",
                    "entity": "mushroom",
                    "attribute": "room temperature",
                    "change": "less likely"
                },
                {
                    "type": "openpi_entity",
                    "entity": "mushroom",
                    "attribute": "soft",
                    "change": "more likely"
                },
                {
                    "type": "openpi_entity",
                    "entity": "mushroom",
                    "attribute": "hard",
                    "change": "less likely"
                },
                {
                    "type": "openpi_entity",
                    "entity": "microwave",
                    "attribute": "on",
                    "change": "more likely"
                },
                {
                    "type": "openpi_entity",
                    "entity": "microwave",
                    "attribute": "off",
                    "change": "less likely"
                },
                {
                    "type": "openpi_entity",
                    "entity": "mushroom",
                    "attribute": "cold",
                    "change": "more likely"
                },
                {
                    "type": "openpi_entity",
                    "entity": "mushroom",
                    "attribute": "warm",
                    "change": "less likely"
                },
                {
                    "type": "openpi_entity",
                    "entity": "microwave",
                    "attribute": "full",
                    "change": "more likely"
                },
                {
                    "type": "openpi_entity",
                    "entity": "microwave",
                    "attribute": "empty",
                    "change": "less likely"
                },
                {
                    "type": "openpi_entity",
                    "entity": "mushroom",
                    "attribute": "cool",
                    "change": "more likely"
                },
                {
                    "type": "openpi_entity",
                    "entity": "mushroom",
                    "attribute": "warm",
                    "change": "less likely"
                },
                {
                    "type": "openpi_entity",
                    "entity": "mushroom",
                    "attribute": "cold",
                    "change": "more likely"
                },
                {
                    "type": "openpi_entity",
                    "entity": "mushroom",
                    "attribute": "hot",
                    "change": "less likely"
                },
                {
                    "type": "openpi_entity",
                    "entity": "mushroom",
                    "attribute": "cooler",
                    "change": "more likely"
                },
                {
                    "type": "openpi_entity",
                    "entity": "mushroom",
                    "attribute": "room temperature",
                    "change": "less likely"
                }
            ],
            [
                {
                    "type": "step",
                    "step": "Freeze in plastic resealable bags"
                },
                {
                    "type": "entity",
                    "entity": "the mushroom",
                    "attribute": "frozen",
                    "change": "more likely"
                },
                {
                    "type": "multihop",
                    "event": "I eat the mushrooms.",
                    "change": "less likely"
                },
                {
                    "type": "openpi_entity",
                    "entity": "mushroom",
                    "attribute": "soft",
                    "change": "more likely"
                },
                {
                    "type": "openpi_entity",
                    "entity": "mushroom",
                    "attribute": "hard",
                    "change": "less likely"
                },
                {
                    "type": "openpi_entity",
                    "entity": "mushroom",
                    "attribute": "removed",
                    "change": "more likely"
                },
                {
                    "type": "openpi_entity",
                    "entity": "mushroom",
                    "attribute": "on counter",
                    "change": "less likely"
                },
                {
                    "type": "openpi_entity",
                    "entity": "mushroom bag",
                    "attribute": "heavier",
                    "change": "more likely"
                },
                {
                    "type": "openpi_entity",
                    "entity": "mushroom bag",
                    "attribute": "light",
                    "change": "less likely"
                },
                {
                    "type": "openpi_entity",
                    "entity": "mushroom",
                    "attribute": "in bag",
                    "change": "more likely"
                },
                {
                    "type": "openpi_entity",
                    "entity": "mushroom",
                    "attribute": "in pan",
                    "change": "less likely"
                },
                {
                    "type": "openpi_entity",
                    "entity": "mushroom",
                    "attribute": "in bag",
                    "change": "more likely"
                },
                {
                    "type": "openpi_entity",
                    "entity": "mushroom",
                    "attribute": "on counter",
                    "change": "less likely"
                },
                {
                    "type": "openpi_entity",
                    "entity": "pan",
                    "attribute": "empty",
                    "change": "more likely"
                },
                {
                    "type": "openpi_entity",
                    "entity": "pan",
                    "attribute": "full",
                    "change": "less likely"
                },
                {
                    "type": "openpi_entity",
                    "entity": "plastic bag",
                    "attribute": "heavier",
                    "change": "more likely"
                },
                {
                    "type": "openpi_entity",
                    "entity": "plastic bag",
                    "attribute": "lighter",
                    "change": "less likely"
                },
                {
                    "type": "openpi_entity",
                    "entity": "mushroom",
                    "attribute": "cold",
                    "change": "more likely"
                },
                {
                    "type": "openpi_entity",
                    "entity": "mushroom",
                    "attribute": "warm",
                    "change": "less likely"
                },
                {
                    "type": "openpi_entity",
                    "entity": "bag",
                    "attribute": "full",
                    "change": "more likely"
                },
                {
                    "type": "openpi_entity",
                    "entity": "bag",
                    "attribute": "empty",
                    "change": "less likely"
                },
                {
                    "type": "openpi_entity",
                    "entity": "bag",
                    "attribute": "full",
                    "change": "more likely"
                },
                {
                    "type": "openpi_entity",
                    "entity": "bag",
                    "attribute": "empty",
                    "change": "less likely"
                },
                {
                    "type": "openpi_entity",
                    "entity": "mushroom",
                    "attribute": "sliced",
                    "change": "more likely"
                },
                {
                    "type": "openpi_entity",
                    "entity": "mushroom",
                    "attribute": "whole",
                    "change": "less likely"
                }
            ]
        ]
    },
    "21": {
        "goal": "Grind coffee beans",
        "annotator": "Shuyan",
        "steps": [
            [
                {
                    "step": "Start."
                }
            ],
            [
                {
                    "type": "step",
                    "step": "Prepare a sealed jar"
                },
                {
                    "type": "openpi_entity",
                    "entity": "the jar",
                    "attribute": "wetter",
                    "change": "more likely"
                },
                {
                    "type": "openpi_entity",
                    "entity": "the jar",
                    "attribute": "dryer",
                    "change": "less likely"
                },
                {
                    "type": "openpi_entity",
                    "entity": "wetter jar",
                    "attribute": "wet",
                    "change": "more likely"
                },
                {
                    "type": "openpi_entity",
                    "entity": "wetter jar",
                    "attribute": "dry",
                    "change": "less likely"
                },
                {
                    "type": "openpi_entity",
                    "entity": "the jar",
                    "attribute": "dirty",
                    "change": "more likely"
                },
                {
                    "type": "openpi_entity",
                    "entity": "the jar",
                    "attribute": "clean",
                    "change": "less likely"
                },
                {
                    "type": "openpi_entity",
                    "entity": "bucket",
                    "attribute": "full",
                    "change": "more likely"
                },
                {
                    "type": "openpi_entity",
                    "entity": "bucket",
                    "attribute": "empty",
                    "change": "less likely"
                },
                {
                    "type": "openpi_entity",
                    "entity": "the jar",
                    "attribute": "heavier",
                    "change": "more likely"
                },
                {
                    "type": "openpi_entity",
                    "entity": "the jar",
                    "attribute": "lighter",
                    "change": "less likely"
                },
                {
                    "type": "openpi_entity",
                    "entity": "the jar",
                    "attribute": "fuller",
                    "change": "more likely"
                },
                {
                    "type": "openpi_entity",
                    "entity": "the jar",
                    "attribute": "less full",
                    "change": "less likely"
                },
                {
                    "type": "openpi_entity",
                    "entity": "water",
                    "attribute": "in the jar",
                    "change": "more likely"
                },
                {
                    "type": "openpi_entity",
                    "entity": "water",
                    "attribute": "in the faucet lines",
                    "change": "less likely"
                },
                {
                    "type": "openpi_entity",
                    "entity": "jar",
                    "attribute": "wet",
                    "change": "more likely"
                },
                {
                    "type": "openpi_entity",
                    "entity": "jar",
                    "attribute": "dry",
                    "change": "less likely"
                }
            ],
            [
                {
                    "type": "step",
                    "step": "Open the lid of the jar"
                },
                {
                    "type": "entity",
                    "entity": "the jar",
                    "attribute": "open",
                    "change": "more likely"
                },
                {
                    "type": "multihop",
                    "event": "I remove all contents from the jar.",
                    "change": "more likely"
                },
                {
                    "type": "openpi_entity",
                    "entity": "jar",
                    "attribute": "wet",
                    "change": "more likely"
                },
                {
                    "type": "openpi_entity",
                    "entity": "jar",
                    "attribute": "dry",
                    "change": "less likely"
                },
                {
                    "type": "openpi_entity",
                    "entity": "water",
                    "attribute": "in jar",
                    "change": "more likely"
                },
                {
                    "type": "openpi_entity",
                    "entity": "water",
                    "attribute": "in faucet",
                    "change": "less likely"
                },
                {
                    "type": "openpi_entity",
                    "entity": "jar",
                    "attribute": "closed",
                    "change": "more likely"
                },
                {
                    "type": "openpi_entity",
                    "entity": "jar",
                    "attribute": "open",
                    "change": "less likely"
                },
                {
                    "type": "openpi_entity",
                    "entity": "jar",
                    "attribute": "sealed",
                    "change": "more likely"
                },
                {
                    "type": "openpi_entity",
                    "entity": "jar",
                    "attribute": "unsealed",
                    "change": "less likely"
                },
                {
                    "type": "openpi_entity",
                    "entity": "bowl",
                    "attribute": "empty",
                    "change": "more likely"
                },
                {
                    "type": "openpi_entity",
                    "entity": "bowl",
                    "attribute": "full",
                    "change": "less likely"
                },
                {
                    "type": "openpi_entity",
                    "entity": "jar",
                    "attribute": "wet",
                    "change": "more likely"
                },
                {
                    "type": "openpi_entity",
                    "entity": "jar",
                    "attribute": "dry",
                    "change": "less likely"
                },
                {
                    "type": "openpi_entity",
                    "entity": "water",
                    "attribute": "in jar",
                    "change": "more likely"
                },
                {
                    "type": "openpi_entity",
                    "entity": "water",
                    "attribute": "in pipes",
                    "change": "less likely"
                },
                {
                    "type": "openpi_entity",
                    "entity": "jar",
                    "attribute": "hot",
                    "change": "more likely"
                },
                {
                    "type": "openpi_entity",
                    "entity": "jar",
                    "attribute": "room temperature",
                    "change": "less likely"
                },
                {
                    "type": "openpi_entity",
                    "entity": "lid",
                    "attribute": "open",
                    "change": "more likely"
                },
                {
                    "type": "openpi_entity",
                    "entity": "lid",
                    "attribute": "closed",
                    "change": "less likely"
                }
            ],
            [
                {
                    "type": "step",
                    "step": "Open the coffee bean bag"
                },
                {
                    "type": "entity",
                    "entity": "the coffee bean bag",
                    "attribute": "open",
                    "change": "more likely"
                },
                {
                    "type": "multihop",
                    "event": "I remove all contents from the coffee bean bag.",
                    "change": "more likely"
                },
                {
                    "type": "openpi_entity",
                    "entity": "fee bean bag",
                    "attribute": "closed",
                    "change": "more likely"
                },
                {
                    "type": "openpi_entity",
                    "entity": "fee bean bag",
                    "attribute": "open",
                    "change": "less likely"
                },
                {
                    "type": "openpi_entity",
                    "entity": "lid",
                    "attribute": "down",
                    "change": "more likely"
                },
                {
                    "type": "openpi_entity",
                    "entity": "lid",
                    "attribute": "up",
                    "change": "less likely"
                },
                {
                    "type": "openpi_entity",
                    "entity": "fee bag",
                    "attribute": "in the jar",
                    "change": "more likely"
                },
                {
                    "type": "openpi_entity",
                    "entity": "fee bag",
                    "attribute": "in hand",
                    "change": "less likely"
                },
                {
                    "type": "openpi_entity",
                    "entity": "fee bag",
                    "attribute": "sealed",
                    "change": "more likely"
                },
                {
                    "type": "openpi_entity",
                    "entity": "fee bag",
                    "attribute": "empty",
                    "change": "less likely"
                },
                {
                    "type": "openpi_entity",
                    "entity": "jar",
                    "attribute": "open",
                    "change": "more likely"
                },
                {
                    "type": "openpi_entity",
                    "entity": "jar",
                    "attribute": "closed",
                    "change": "less likely"
                },
                {
                    "type": "openpi_entity",
                    "entity": "jar",
                    "attribute": "closed",
                    "change": "more likely"
                },
                {
                    "type": "openpi_entity",
                    "entity": "jar",
                    "attribute": "open",
                    "change": "less likely"
                },
                {
                    "type": "openpi_entity",
                    "entity": "fee bean bag",
                    "attribute": "full",
                    "change": "more likely"
                },
                {
                    "type": "openpi_entity",
                    "entity": "fee bean bag",
                    "attribute": "empty",
                    "change": "less likely"
                }
            ],
            [
                {
                    "type": "step",
                    "step": "Open the lid of the grinder."
                },
                {
                    "type": "openpi_entity",
                    "entity": "lid",
                    "attribute": "open",
                    "change": "more likely"
                },
                {
                    "type": "openpi_entity",
                    "entity": "lid",
                    "attribute": "closed",
                    "change": "less likely"
                },
                {
                    "type": "openpi_entity",
                    "entity": "grinder",
                    "attribute": "turning to the side",
                    "change": "more likely"
                },
                {
                    "type": "openpi_entity",
                    "entity": "grinder",
                    "attribute": "still",
                    "change": "less likely"
                },
                {
                    "type": "openpi_entity",
                    "entity": "grinder",
                    "attribute": "in open jar",
                    "change": "more likely"
                },
                {
                    "type": "openpi_entity",
                    "entity": "grinder",
                    "attribute": "in toolbox",
                    "change": "less likely"
                },
                {
                    "type": "openpi_entity",
                    "entity": "jar",
                    "attribute": "open",
                    "change": "more likely"
                },
                {
                    "type": "openpi_entity",
                    "entity": "jar",
                    "attribute": "closed",
                    "change": "less likely"
                },
                {
                    "type": "openpi_entity",
                    "entity": "lid",
                    "attribute": "open",
                    "change": "more likely"
                },
                {
                    "type": "openpi_entity",
                    "entity": "lid",
                    "attribute": "closed",
                    "change": "less likely"
                }
            ],
            [
                {
                    "type": "step",
                    "step": "Pour some coffee beans to the grinder"
                },
                {
                    "type": "entity",
                    "entity": "the grinder",
                    "attribute": "empty",
                    "change": "less likely"
                },
                {
                    "type": "openpi_entity",
                    "entity": "grinder",
                    "attribute": "full",
                    "change": "more likely"
                },
                {
                    "type": "openpi_entity",
                    "entity": "grinder",
                    "attribute": "empty",
                    "change": "less likely"
                },
                {
                    "type": "openpi_entity",
                    "entity": "grinder",
                    "attribute": "full of beans",
                    "change": "more likely"
                },
                {
                    "type": "openpi_entity",
                    "entity": "grinder",
                    "attribute": "empty",
                    "change": "less likely"
                },
                {
                    "type": "openpi_entity",
                    "entity": "fee bean bag",
                    "attribute": "wet",
                    "change": "more likely"
                },
                {
                    "type": "openpi_entity",
                    "entity": "fee bean bag",
                    "attribute": "dry",
                    "change": "less likely"
                }
            ],
            [
                {
                    "type": "step",
                    "step": "Plug in the grinder"
                },
                {
                    "type": "openpi_entity",
                    "entity": "jar",
                    "attribute": "full",
                    "change": "more likely"
                },
                {
                    "type": "openpi_entity",
                    "entity": "jar",
                    "attribute": "empty",
                    "change": "less likely"
                },
                {
                    "type": "openpi_entity",
                    "entity": "fee",
                    "attribute": "being mixed with grinder",
                    "change": "more likely"
                },
                {
                    "type": "openpi_entity",
                    "entity": "fee",
                    "attribute": "sitting there",
                    "change": "less likely"
                },
                {
                    "type": "openpi_entity",
                    "entity": "grinder",
                    "attribute": "on",
                    "change": "more likely"
                },
                {
                    "type": "openpi_entity",
                    "entity": "grinder",
                    "attribute": "off",
                    "change": "less likely"
                },
                {
                    "type": "openpi_entity",
                    "entity": "grinder",
                    "attribute": "wet",
                    "change": "more likely"
                },
                {
                    "type": "openpi_entity",
                    "entity": "grinder",
                    "attribute": "dry",
                    "change": "less likely"
                }
            ],
            [
                {
                    "type": "step",
                    "step": "Set the grinding options"
                },
                {
                    "type": "openpi_entity",
                    "entity": "fee bean bag",
                    "attribute": "emptied",
                    "change": "more likely"
                },
                {
                    "type": "openpi_entity",
                    "entity": "fee bean bag",
                    "attribute": "full of beans",
                    "change": "less likely"
                },
                {
                    "type": "openpi_entity",
                    "entity": "grinder knob",
                    "attribute": "up",
                    "change": "more likely"
                },
                {
                    "type": "openpi_entity",
                    "entity": "grinder knob",
                    "attribute": "down",
                    "change": "less likely"
                },
                {
                    "type": "openpi_entity",
                    "entity": "grinder",
                    "attribute": "used",
                    "change": "more likely"
                },
                {
                    "type": "openpi_entity",
                    "entity": "grinder",
                    "attribute": "unused",
                    "change": "less likely"
                },
                {
                    "type": "openpi_entity",
                    "entity": "grind",
                    "attribute": "on",
                    "change": "more likely"
                },
                {
                    "type": "openpi_entity",
                    "entity": "grind",
                    "attribute": "off",
                    "change": "less likely"
                },
                {
                    "type": "openpi_entity",
                    "entity": "grind",
                    "attribute": "spinning",
                    "change": "more likely"
                },
                {
                    "type": "openpi_entity",
                    "entity": "grind",
                    "attribute": "still",
                    "change": "less likely"
                },
                {
                    "type": "openpi_entity",
                    "entity": "grinder",
                    "attribute": "empty",
                    "change": "more likely"
                },
                {
                    "type": "openpi_entity",
                    "entity": "grinder",
                    "attribute": "full",
                    "change": "less likely"
                },
                {
                    "type": "openpi_entity",
                    "entity": "grinder",
                    "attribute": "on",
                    "change": "more likely"
                },
                {
                    "type": "openpi_entity",
                    "entity": "grinder",
                    "attribute": "off",
                    "change": "less likely"
                }
            ],
            [
                {
                    "type": "step",
                    "step": "Press the button"
                },
                {
                    "type": "openpi_entity",
                    "entity": "grind",
                    "attribute": "on",
                    "change": "more likely"
                },
                {
                    "type": "openpi_entity",
                    "entity": "grind",
                    "attribute": "off",
                    "change": "less likely"
                },
                {
                    "type": "openpi_entity",
                    "entity": "grind knob",
                    "attribute": "open",
                    "change": "more likely"
                },
                {
                    "type": "openpi_entity",
                    "entity": "grind knob",
                    "attribute": "closed",
                    "change": "less likely"
                },
                {
                    "type": "openpi_entity",
                    "entity": "knob",
                    "attribute": "in motion",
                    "change": "more likely"
                },
                {
                    "type": "openpi_entity",
                    "entity": "knob",
                    "attribute": "still",
                    "change": "less likely"
                },
                {
                    "type": "openpi_entity",
                    "entity": "button",
                    "attribute": "pressed on",
                    "change": "more likely"
                },
                {
                    "type": "openpi_entity",
                    "entity": "button",
                    "attribute": "in hand",
                    "change": "less likely"
                },
                {
                    "type": "openpi_entity",
                    "entity": "finger",
                    "attribute": "gripped",
                    "change": "more likely"
                },
                {
                    "type": "openpi_entity",
                    "entity": "finger",
                    "attribute": "relaxed",
                    "change": "less likely"
                }
            ],
            [
                {
                    "type": "step",
                    "step": "Wait until the grinder stops automatically"
                },
                {
                    "type": "entity",
                    "entity": "the coffee bean",
                    "attribute": "grounded",
                    "change": "more likely"
                },
                {
                    "type": "multihop",
                    "event": "The coffee beans are in the shape of powder.",
                    "change": "more likely"
                },
                {
                    "type": "openpi_entity",
                    "entity": "knob",
                    "attribute": "set",
                    "change": "more likely"
                },
                {
                    "type": "openpi_entity",
                    "entity": "knob",
                    "attribute": "in use",
                    "change": "less likely"
                },
                {
                    "type": "openpi_entity",
                    "entity": "grinder",
                    "attribute": "moving",
                    "change": "more likely"
                },
                {
                    "type": "openpi_entity",
                    "entity": "grinder",
                    "attribute": "still",
                    "change": "less likely"
                },
                {
                    "type": "openpi_entity",
                    "entity": "grinder",
                    "attribute": "in motion",
                    "change": "more likely"
                },
                {
                    "type": "openpi_entity",
                    "entity": "grinder",
                    "attribute": "still",
                    "change": "less likely"
                }
            ],
            [
                {
                    "type": "step",
                    "step": "Open the lid of the grinder"
                },
                {
                    "type": "multihop",
                    "event": "I can use the beans to make expresso.",
                    "change": "more likely"
                },
                {
                    "type": "openpi_entity",
                    "entity": "grind knob",
                    "attribute": "in the on position",
                    "change": "more likely"
                },
                {
                    "type": "openpi_entity",
                    "entity": "grind knob",
                    "attribute": "in the off position",
                    "change": "less likely"
                },
                {
                    "type": "openpi_entity",
                    "entity": "lid",
                    "attribute": "open",
                    "change": "more likely"
                },
                {
                    "type": "openpi_entity",
                    "entity": "lid",
                    "attribute": "closed",
                    "change": "less likely"
                },
                {
                    "type": "openpi_entity",
                    "entity": "the lid",
                    "attribute": "now open",
                    "change": "more likely"
                },
                {
                    "type": "openpi_entity",
                    "entity": "the lid",
                    "attribute": "closed",
                    "change": "less likely"
                }
            ],
            [
                {
                    "type": "step",
                    "step": "Pour all the grounded coffee into the jar"
                },
                {
                    "type": "entity",
                    "entity": "the grinder",
                    "attribute": "empty",
                    "change": "more likely"
                },
                {
                    "type": "openpi_entity",
                    "entity": "lid",
                    "attribute": "closed",
                    "change": "more likely"
                },
                {
                    "type": "openpi_entity",
                    "entity": "lid",
                    "attribute": "open",
                    "change": "less likely"
                },
                {
                    "type": "openpi_entity",
                    "entity": "fee",
                    "attribute": "in jar",
                    "change": "more likely"
                },
                {
                    "type": "openpi_entity",
                    "entity": "fee",
                    "attribute": "in grinder",
                    "change": "less likely"
                },
                {
                    "type": "openpi_entity",
                    "entity": "fee",
                    "attribute": "in jar",
                    "change": "more likely"
                },
                {
                    "type": "openpi_entity",
                    "entity": "fee",
                    "attribute": "in jar",
                    "change": "less likely"
                },
                {
                    "type": "openpi_entity",
                    "entity": "jar",
                    "attribute": "full",
                    "change": "more likely"
                },
                {
                    "type": "openpi_entity",
                    "entity": "jar",
                    "attribute": "empty",
                    "change": "less likely"
                },
                {
                    "type": "openpi_entity",
                    "entity": "grinder",
                    "attribute": "empty",
                    "change": "more likely"
                },
                {
                    "type": "openpi_entity",
                    "entity": "grinder",
                    "attribute": "full",
                    "change": "less likely"
                }
            ],
            [
                {
                    "type": "step",
                    "step": "Seal the jar"
                },
                {
                    "type": "entity",
                    "entity": "the jar",
                    "attribute": "open",
                    "change": "less likely"
                },
                {
                    "type": "multihop",
                    "event": "I remove all contents from the jar.",
                    "change": "less likely"
                },
                {
                    "type": "openpi_entity",
                    "entity": "jar",
                    "attribute": "closed",
                    "change": "more likely"
                },
                {
                    "type": "openpi_entity",
                    "entity": "jar",
                    "attribute": "open",
                    "change": "less likely"
                },
                {
                    "type": "openpi_entity",
                    "entity": "lid",
                    "attribute": "sealed",
                    "change": "more likely"
                },
                {
                    "type": "openpi_entity",
                    "entity": "lid",
                    "attribute": "unsealed",
                    "change": "less likely"
                },
                {
                    "type": "openpi_entity",
                    "entity": "jar",
                    "attribute": "sealed",
                    "change": "more likely"
                },
                {
                    "type": "openpi_entity",
                    "entity": "jar",
                    "attribute": "open",
                    "change": "less likely"
                },
                {
                    "type": "openpi_entity",
                    "entity": "jar",
                    "attribute": "more full",
                    "change": "more likely"
                },
                {
                    "type": "openpi_entity",
                    "entity": "jar",
                    "attribute": "less full",
                    "change": "less likely"
                }
            ],
            [
                {
                    "type": "step",
                    "step": "Unplug the grinder."
                },
                {
                    "type": "openpi_entity",
                    "entity": "lid",
                    "attribute": "on the grinder",
                    "change": "more likely"
                },
                {
                    "type": "openpi_entity",
                    "entity": "lid",
                    "attribute": "off the grinder",
                    "change": "less likely"
                },
                {
                    "type": "openpi_entity",
                    "entity": "fee",
                    "attribute": "in jar",
                    "change": "more likely"
                },
                {
                    "type": "openpi_entity",
                    "entity": "fee",
                    "attribute": "in grinder",
                    "change": "less likely"
                },
                {
                    "type": "openpi_entity",
                    "entity": "jar",
                    "attribute": "full",
                    "change": "more likely"
                },
                {
                    "type": "openpi_entity",
                    "entity": "jar",
                    "attribute": "empty",
                    "change": "less likely"
                },
                {
                    "type": "openpi_entity",
                    "entity": "fee",
                    "attribute": "crumpled",
                    "change": "more likely"
                },
                {
                    "type": "openpi_entity",
                    "entity": "fee",
                    "attribute": "in a ball",
                    "change": "less likely"
                }
            ],
            [
                {
                    "type": "step",
                    "step": "Seal the coffee bean bag."
                },
                {
                    "type": "entity",
                    "entity": "the coffee bean bag",
                    "attribute": "open",
                    "change": "less likely"
                },
                {
                    "type": "multihop",
                    "event": "I remove all contents from the coffee bean bag.",
                    "change": "less likely"
                },
                {
                    "type": "openpi_entity",
                    "entity": "bean bag",
                    "attribute": "closed",
                    "change": "more likely"
                },
                {
                    "type": "openpi_entity",
                    "entity": "bean bag",
                    "attribute": "open",
                    "change": "less likely"
                },
                {
                    "type": "openpi_entity",
                    "entity": "fee bag",
                    "attribute": "sealed",
                    "change": "more likely"
                },
                {
                    "type": "openpi_entity",
                    "entity": "fee bag",
                    "attribute": "unsealed",
                    "change": "less likely"
                },
                {
                    "type": "openpi_entity",
                    "entity": "fee bean bag",
                    "attribute": "sealed",
                    "change": "more likely"
                },
                {
                    "type": "openpi_entity",
                    "entity": "fee bean bag",
                    "attribute": "open",
                    "change": "less likely"
                }
            ]
        ]
    },
    "22": {
        "goal": "Make coffee expresso",
        "annotator": "Shuyan",
        "steps": [
            [
                {
                    "step": "Start."
                }
            ],
            [
                {
                    "type": "step",
                    "step": "Power on the expresso machine"
                },
                {
                    "type": "entity",
                    "entity": "the coffee machine",
                    "attribute": "powered on",
                    "change": "more likely"
                },
                {
                    "type": "multihop",
                    "event": "An indicator light shines.",
                    "change": "more likely"
                },
                {
                    "type": "openpi_entity",
                    "entity": "expresso machine",
                    "attribute": "turned on",
                    "change": "more likely"
                },
                {
                    "type": "openpi_entity",
                    "entity": "expresso machine",
                    "attribute": "turned off",
                    "change": "less likely"
                },
                {
                    "type": "openpi_entity",
                    "entity": "machine",
                    "attribute": "on",
                    "change": "more likely"
                },
                {
                    "type": "openpi_entity",
                    "entity": "machine",
                    "attribute": "off",
                    "change": "less likely"
                },
                {
                    "type": "openpi_entity",
                    "entity": "motor",
                    "attribute": "hot",
                    "change": "more likely"
                },
                {
                    "type": "openpi_entity",
                    "entity": "motor",
                    "attribute": "cold",
                    "change": "less likely"
                },
                {
                    "type": "openpi_entity",
                    "entity": "timer",
                    "attribute": "running",
                    "change": "more likely"
                },
                {
                    "type": "openpi_entity",
                    "entity": "timer",
                    "attribute": "off",
                    "change": "less likely"
                },
                {
                    "type": "openpi_entity",
                    "entity": "engine",
                    "attribute": "warm",
                    "change": "more likely"
                },
                {
                    "type": "openpi_entity",
                    "entity": "engine",
                    "attribute": "cold",
                    "change": "less likely"
                },
                {
                    "type": "openpi_entity",
                    "entity": "temp",
                    "attribute": "warm",
                    "change": "more likely"
                },
                {
                    "type": "openpi_entity",
                    "entity": "temp",
                    "attribute": "cold",
                    "change": "less likely"
                },
                {
                    "type": "openpi_entity",
                    "entity": "car power",
                    "attribute": "on",
                    "change": "more likely"
                },
                {
                    "type": "openpi_entity",
                    "entity": "car power",
                    "attribute": "off",
                    "change": "less likely"
                }
            ],
            [
                {
                    "type": "step",
                    "step": "Turn the machine to expresso mode."
                },
                {
                    "type": "openpi_entity",
                    "entity": "expresso",
                    "attribute": "on",
                    "change": "more likely"
                },
                {
                    "type": "openpi_entity",
                    "entity": "expresso",
                    "attribute": "off",
                    "change": "less likely"
                },
                {
                    "type": "openpi_entity",
                    "entity": "power",
                    "attribute": "on",
                    "change": "more likely"
                },
                {
                    "type": "openpi_entity",
                    "entity": "power",
                    "attribute": "off",
                    "change": "less likely"
                },
                {
                    "type": "openpi_entity",
                    "entity": "the machine",
                    "attribute": "hot",
                    "change": "more likely"
                },
                {
                    "type": "openpi_entity",
                    "entity": "the machine",
                    "attribute": "cold",
                    "change": "less likely"
                },
                {
                    "type": "openpi_entity",
                    "entity": "the machine",
                    "attribute": "turned on",
                    "change": "more likely"
                },
                {
                    "type": "openpi_entity",
                    "entity": "the machine",
                    "attribute": "turned off",
                    "change": "less likely"
                },
                {
                    "type": "openpi_entity",
                    "entity": "stove",
                    "attribute": "turned on",
                    "change": "more likely"
                },
                {
                    "type": "openpi_entity",
                    "entity": "stove",
                    "attribute": "turned off",
                    "change": "less likely"
                },
                {
                    "type": "openpi_entity",
                    "entity": "machine",
                    "attribute": "on",
                    "change": "more likely"
                },
                {
                    "type": "openpi_entity",
                    "entity": "machine",
                    "attribute": "off",
                    "change": "less likely"
                }
            ],
            [
                {
                    "type": "step",
                    "step": "Open the container where the grounded coffee is."
                },
                {
                    "type": "openpi_entity",
                    "entity": "container",
                    "attribute": "open",
                    "change": "more likely"
                },
                {
                    "type": "openpi_entity",
                    "entity": "container",
                    "attribute": "closed",
                    "change": "less likely"
                },
                {
                    "type": "openpi_entity",
                    "entity": "fee container",
                    "attribute": "full",
                    "change": "more likely"
                },
                {
                    "type": "openpi_entity",
                    "entity": "fee container",
                    "attribute": "dry",
                    "change": "less likely"
                },
                {
                    "type": "openpi_entity",
                    "entity": "container",
                    "attribute": "full",
                    "change": "more likely"
                },
                {
                    "type": "openpi_entity",
                    "entity": "container",
                    "attribute": "empty",
                    "change": "less likely"
                },
                {
                    "type": "openpi_entity",
                    "entity": "container",
                    "attribute": "full",
                    "change": "more likely"
                },
                {
                    "type": "openpi_entity",
                    "entity": "container",
                    "attribute": "empty",
                    "change": "less likely"
                },
                {
                    "type": "openpi_entity",
                    "entity": "expresso machine",
                    "attribute": "on",
                    "change": "more likely"
                },
                {
                    "type": "openpi_entity",
                    "entity": "expresso machine",
                    "attribute": "off",
                    "change": "less likely"
                },
                {
                    "type": "openpi_entity",
                    "entity": "the container",
                    "attribute": "filled with coffee",
                    "change": "more likely"
                },
                {
                    "type": "openpi_entity",
                    "entity": "the container",
                    "attribute": "empty",
                    "change": "less likely"
                },
                {
                    "type": "openpi_entity",
                    "entity": "container",
                    "attribute": "touching the ground",
                    "change": "more likely"
                },
                {
                    "type": "openpi_entity",
                    "entity": "container",
                    "attribute": "in the corner",
                    "change": "less likely"
                }
            ],
            [
                {
                    "type": "step",
                    "step": "Scoop the right amount of coffee to the portafilter."
                },
                {
                    "type": "openpi_entity",
                    "entity": "fee",
                    "attribute": "in the mug",
                    "change": "more likely"
                },
                {
                    "type": "openpi_entity",
                    "entity": "fee",
                    "attribute": "in the container",
                    "change": "less likely"
                },
                {
                    "type": "openpi_entity",
                    "entity": "fee",
                    "attribute": "poured to portafilter",
                    "change": "more likely"
                },
                {
                    "type": "openpi_entity",
                    "entity": "fee",
                    "attribute": "inside the container",
                    "change": "less likely"
                },
                {
                    "type": "openpi_entity",
                    "entity": "container",
                    "attribute": "full",
                    "change": "more likely"
                },
                {
                    "type": "openpi_entity",
                    "entity": "container",
                    "attribute": "empty",
                    "change": "less likely"
                },
                {
                    "type": "openpi_entity",
                    "entity": "fee",
                    "attribute": "in mug",
                    "change": "more likely"
                },
                {
                    "type": "openpi_entity",
                    "entity": "fee",
                    "attribute": "in container",
                    "change": "less likely"
                },
                {
                    "type": "openpi_entity",
                    "entity": "fee",
                    "attribute": "drier",
                    "change": "more likely"
                },
                {
                    "type": "openpi_entity",
                    "entity": "fee",
                    "attribute": "wet",
                    "change": "less likely"
                }
            ],
            [
                {
                    "type": "step",
                    "step": "Put a cup under the portafilter"
                },
                {
                    "type": "openpi_entity",
                    "entity": "cup",
                    "attribute": "under portafilter",
                    "change": "more likely"
                },
                {
                    "type": "openpi_entity",
                    "entity": "cup",
                    "attribute": "under coffee",
                    "change": "less likely"
                },
                {
                    "type": "openpi_entity",
                    "entity": "cup",
                    "attribute": "closed",
                    "change": "more likely"
                },
                {
                    "type": "openpi_entity",
                    "entity": "cup",
                    "attribute": "open",
                    "change": "less likely"
                },
                {
                    "type": "openpi_entity",
                    "entity": "cup",
                    "attribute": "under the coffee",
                    "change": "more likely"
                },
                {
                    "type": "openpi_entity",
                    "entity": "cup",
                    "attribute": "under the coffee",
                    "change": "less likely"
                },
                {
                    "type": "openpi_entity",
                    "entity": "portafilter",
                    "attribute": "full",
                    "change": "more likely"
                },
                {
                    "type": "openpi_entity",
                    "entity": "portafilter",
                    "attribute": "empty",
                    "change": "less likely"
                }
            ],
            [
                {
                    "type": "step",
                    "step": "Wait until the expresso mode is ready"
                },
                {
                    "type": "openpi_entity",
                    "entity": "fee",
                    "attribute": "light",
                    "change": "more likely"
                },
                {
                    "type": "openpi_entity",
                    "entity": "fee",
                    "attribute": "dark",
                    "change": "less likely"
                },
                {
                    "type": "openpi_entity",
                    "entity": "portafilter",
                    "attribute": "full",
                    "change": "more likely"
                },
                {
                    "type": "openpi_entity",
                    "entity": "portafilter",
                    "attribute": "empty",
                    "change": "less likely"
                }
            ],
            [
                {
                    "type": "step",
                    "step": "Set the machine to expresso producing mode"
                },
                {
                    "type": "openpi_entity",
                    "entity": "power",
                    "attribute": "on",
                    "change": "more likely"
                },
                {
                    "type": "openpi_entity",
                    "entity": "power",
                    "attribute": "off",
                    "change": "less likely"
                },
                {
                    "type": "openpi_entity",
                    "entity": "expresso mode",
                    "attribute": "on",
                    "change": "more likely"
                },
                {
                    "type": "openpi_entity",
                    "entity": "expresso mode",
                    "attribute": "off",
                    "change": "less likely"
                },
                {
                    "type": "openpi_entity",
                    "entity": "machine",
                    "attribute": "to make coffee with a cup",
                    "change": "more likely"
                },
                {
                    "type": "openpi_entity",
                    "entity": "machine",
                    "attribute": "to make coffee",
                    "change": "less likely"
                },
                {
                    "type": "openpi_entity",
                    "entity": "the machine to expresso mode",
                    "attribute": "lit",
                    "change": "more likely"
                },
                {
                    "type": "openpi_entity",
                    "entity": "the machine to expresso mode",
                    "attribute": "unlit",
                    "change": "less likely"
                },
                {
                    "type": "openpi_entity",
                    "entity": "machine to expresso",
                    "attribute": "lit",
                    "change": "more likely"
                },
                {
                    "type": "openpi_entity",
                    "entity": "machine to expresso",
                    "attribute": "unlit",
                    "change": "less likely"
                },
                {
                    "type": "openpi_entity",
                    "entity": "cup",
                    "attribute": "under the machine",
                    "change": "more likely"
                },
                {
                    "type": "openpi_entity",
                    "entity": "cup",
                    "attribute": "under the portafilter",
                    "change": "less likely"
                },
                {
                    "type": "openpi_entity",
                    "entity": "fee",
                    "attribute": "manufactured",
                    "change": "more likely"
                },
                {
                    "type": "openpi_entity",
                    "entity": "fee",
                    "attribute": "to be made",
                    "change": "less likely"
                }
            ],
            [
                {
                    "type": "step",
                    "step": "Stop the coffee machine"
                },
                {
                    "type": "entity",
                    "entity": "the expresso",
                    "attribute": "ready",
                    "change": "more likely"
                },
                {
                    "type": "multihop",
                    "event": "I drink the coffee expresso.",
[truncated: 429,109 more chars]
