# Supplementary material
Source: ML conference proceedings conference paper supplement (https://aclanthology.org/2023.findings-eacl.31)
Supplement: dataset [file 2023.findings-eacl.31.dataset.zip › causal_reasoning_of_entities_and_events/openpi/weiqiu1.0/0hop-pred-test.json]

{
    "1": {
        "goal": "Clean up kitchen counter",
        "annotator": "Hengyan Tao",
        "steps": [
            [
                {
                    "step": "Start."
                }
            ],
            [
                {
                    "type": "step",
                    "step": "Wear rubber gloves."
                }
            ],
            [
                {
                    "type": "step",
                    "step": "Get towels and wipes."
                },
                {
                    "type": "openpi_entity",
                    "entity": "washing machine",
                    "attribute": "full",
                    "change": "more likely"
                },
                {
                    "type": "openpi_entity",
                    "entity": "washing machine",
                    "attribute": "empty",
                    "change": "less likely"
                },
                {
                    "type": "openpi_entity",
                    "entity": "water",
                    "attribute": "on",
                    "change": "more likely"
                },
                {
                    "type": "openpi_entity",
                    "entity": "water",
                    "attribute": "off",
                    "change": "less likely"
                },
                {
                    "type": "openpi_entity",
                    "entity": "laundry",
                    "attribute": "cleaned",
                    "change": "more likely"
                },
                {
                    "type": "openpi_entity",
                    "entity": "laundry",
                    "attribute": "dirty",
                    "change": "less likely"
                },
                {
                    "type": "openpi_entity",
                    "entity": "water",
                    "attribute": "in sink",
                    "change": "more likely"
                },
                {
                    "type": "openpi_entity",
                    "entity": "water",
                    "attribute": "in pipes",
                    "change": "less likely"
                },
                {
                    "type": "openpi_entity",
                    "entity": "water",
                    "attribute": "in sink",
                    "change": "more likely"
                },
                {
                    "type": "openpi_entity",
                    "entity": "water",
                    "attribute": "in pipes",
                    "change": "less likely"
                },
                {
                    "type": "openpi_entity",
                    "entity": "soap",
                    "attribute": "in water",
                    "change": "more likely"
                },
                {
                    "type": "openpi_entity",
                    "entity": "soap",
                    "attribute": "in bottle",
                    "change": "less likely"
                },
                {
                    "type": "openpi_entity",
                    "entity": "wipes",
                    "attribute": "in washing machine",
                    "change": "more likely"
                },
                {
                    "type": "openpi_entity",
                    "entity": "wipes",
                    "attribute": "in pantry",
                    "change": "less likely"
                },
                {
                    "type": "openpi_entity",
                    "entity": "laundry detergent",
                    "attribute": "in water",
                    "change": "more likely"
                },
                {
                    "type": "openpi_entity",
                    "entity": "laundry detergent",
                    "attribute": "in jug",
                    "change": "less likely"
                },
                {
                    "type": "openpi_entity",
                    "entity": "items",
                    "attribute": "in washing machine",
                    "change": "more likely"
                },
                {
                    "type": "openpi_entity",
                    "entity": "items",
                    "attribute": "on table",
                    "change": "less likely"
                },
                {
                    "type": "openpi_entity",
                    "entity": "hands",
                    "attribute": "in the washing machine",
                    "change": "more likely"
                },
                {
                    "type": "openpi_entity",
                    "entity": "hands",
                    "attribute": "at the sides of the washing machine",
                    "change": "less likely"
                },
                {
                    "type": "openpi_entity",
                    "entity": "washing machine",
                    "attribute": "heavier",
                    "change": "more likely"
                },
                {
                    "type": "openpi_entity",
                    "entity": "washing machine",
                    "attribute": "light",
                    "change": "less likely"
                }
            ],
            [
                {
                    "type": "step",
                    "step": "Use wipes to wipe kitchen counter."
                },
                {
                    "type": "entity",
                    "entity": "the Chef",
                    "attribute": "use the counter",
                    "change": "less likely"
                },
                {
                    "type": "openpi_entity",
                    "entity": "counter",
                    "attribute": "wet",
                    "change": "more likely"
                },
                {
                    "type": "openpi_entity",
                    "entity": "counter",
                    "attribute": "dry",
                    "change": "less likely"
                },
                {
                    "type": "openpi_entity",
                    "entity": "kitchen",
                    "attribute": "less likely to have smelly residue",
                    "change": "more likely"
                },
                {
                    "type": "openpi_entity",
                    "entity": "kitchen",
                    "attribute": "likely to have smelly residue",
                    "change": "less likely"
                },
                {
                    "type": "openpi_entity",
                    "entity": "sink",
                    "attribute": "clean",
                    "change": "more likely"
                },
                {
                    "type": "openpi_entity",
                    "entity": "sink",
                    "attribute": "dirty",
                    "change": "less likely"
                },
                {
                    "type": "openpi_entity",
                    "entity": "counter",
                    "attribute": "clear",
                    "change": "more likely"
                },
                {
                    "type": "openpi_entity",
                    "entity": "counter",
                    "attribute": "cluttered",
                    "change": "less likely"
                },
                {
                    "type": "openpi_entity",
                    "entity": "kitchen counter",
                    "attribute": "clean",
                    "change": "more likely"
                },
                {
                    "type": "openpi_entity",
                    "entity": "kitchen counter",
                    "attribute": "dirty",
                    "change": "less likely"
                },
                {
                    "type": "openpi_entity",
                    "entity": "dish soap dispenser",
                    "attribute": "wet",
                    "change": "more likely"
                },
                {
                    "type": "openpi_entity",
                    "entity": "dish soap dispenser",
                    "attribute": "dry",
                    "change": "less likely"
                }
            ],
            [
                {
                    "type": "step",
                    "step": "Use towels to clean kitchen counter."
                },
                {
                    "type": "entity",
                    "entity": "the kitchen counter",
                    "attribute": "cleaned",
                    "change": "more likely"
                },
                {
                    "type": "openpi_entity",
                    "entity": "kitchen counter",
                    "attribute": "wet",
                    "change": "more likely"
                },
                {
                    "type": "openpi_entity",
                    "entity": "kitchen counter",
                    "attribute": "dry",
                    "change": "less likely"
                },
                {
                    "type": "openpi_entity",
                    "entity": "soap",
                    "attribute": "in water",
                    "change": "more likely"
                },
                {
                    "type": "openpi_entity",
                    "entity": "soap",
                    "attribute": "in a container",
                    "change": "less likely"
                },
                {
                    "type": "openpi_entity",
                    "entity": "counter",
                    "attribute": "clean",
                    "change": "more likely"
                },
                {
                    "type": "openpi_entity",
                    "entity": "counter",
                    "attribute": "smelly",
                    "change": "less likely"
                },
                {
                    "type": "openpi_entity",
                    "entity": "counter",
                    "attribute": "wet",
                    "change": "more likely"
                },
                {
                    "type": "openpi_entity",
                    "entity": "counter",
                    "attribute": "dry",
                    "change": "less likely"
                },
                {
                    "type": "openpi_entity",
                    "entity": "sink",
                    "attribute": "full of water",
                    "change": "more likely"
                },
                {
                    "type": "openpi_entity",
                    "entity": "sink",
                    "attribute": "partially full of water",
                    "change": "less likely"
                },
                {
                    "type": "openpi_entity",
                    "entity": "wall",
                    "attribute": "covered",
                    "change": "more likely"
                },
                {
                    "type": "openpi_entity",
                    "entity": "wall",
                    "attribute": "bare",
                    "change": "less likely"
                },
                {
                    "type": "openpi_entity",
                    "entity": "kitchen counter",
                    "attribute": "clean",
                    "change": "more likely"
                },
                {
                    "type": "openpi_entity",
                    "entity": "kitchen counter",
                    "attribute": "dirty",
                    "change": "less likely"
                }
            ],
            [
                {
                    "type": "step",
                    "step": "Let kitchen counter dry."
                },
                {
                    "type": "entity",
                    "entity": "the Chef",
                    "attribute": "use the counter",
                    "change": "more likely"
                },
                {
                    "type": "openpi_entity",
                    "entity": "kitchen",
                    "attribute": "damp",
                    "change": "more likely"
                },
                {
                    "type": "openpi_entity",
                    "entity": "kitchen",
                    "attribute": "soapy",
                    "change": "less likely"
                },
                {
                    "type": "openpi_entity",
                    "entity": "counter",
                    "attribute": "dry",
                    "change": "more likely"
                },
                {
                    "type": "openpi_entity",
                    "entity": "counter",
                    "attribute": "wet",
                    "change": "less likely"
                },
                {
                    "type": "openpi_entity",
                    "entity": "water",
                    "attribute": "in the sink",
                    "change": "more likely"
                },
                {
                    "type": "openpi_entity",
                    "entity": "water",
                    "attribute": "in a faucet",
                    "change": "less likely"
                },
                {
                    "type": "openpi_entity",
                    "entity": "kitchen counter",
                    "attribute": "dry",
                    "change": "more likely"
                },
                {
                    "type": "openpi_entity",
                    "entity": "kitchen counter",
                    "attribute": "wet",
                    "change": "less likely"
                },
                {
                    "type": "openpi_entity",
                    "entity": "bucket",
                    "attribute": "empty",
                    "change": "more likely"
                },
                {
                    "type": "openpi_entity",
                    "entity": "bucket",
                    "attribute": "full",
                    "change": "less likely"
                }
            ]
        ]
    },
    "2": {
        "goal": "Write an essay",
        "annotator": "Hengyan Tao",
        "steps": [
            [
                {
                    "step": "Start."
                }
            ],
            [
                {
                    "type": "step",
                    "step": "Have an idea on what topic about the essay."
                },
                {
                    "type": "openpi_entity",
                    "entity": "idea",
                    "attribute": "in progress",
                    "change": "more likely"
                },
                {
                    "type": "openpi_entity",
                    "entity": "idea",
                    "attribute": "unstarted",
                    "change": "less likely"
                },
                {
                    "type": "openpi_entity",
                    "entity": "topic",
                    "attribute": "defined",
                    "change": "more likely"
                },
                {
                    "type": "openpi_entity",
                    "entity": "topic",
                    "attribute": "undefined",
                    "change": "less likely"
                },
                {
                    "type": "openpi_entity",
                    "entity": "reader",
                    "attribute": "finished with the topic",
                    "change": "more likely"
                },
                {
                    "type": "openpi_entity",
                    "entity": "reader",
                    "attribute": "on the topic",
                    "change": "less likely"
                }
            ],
            [
                {
                    "type": "step",
                    "step": "Have an outline of the essay."
                },
                {
                    "type": "openpi_entity",
                    "entity": "pen",
                    "attribute": "occupied",
                    "change": "more likely"
                },
                {
                    "type": "openpi_entity",
                    "entity": "pen",
                    "attribute": "empty",
                    "change": "less likely"
                },
                {
                    "type": "openpi_entity",
                    "entity": "paper",
                    "attribute": "written on",
                    "change": "more likely"
                },
                {
                    "type": "openpi_entity",
                    "entity": "paper",
                    "attribute": "blank",
                    "change": "less likely"
                },
                {
                    "type": "openpi_entity",
                    "entity": "paper",
                    "attribute": "colored",
                    "change": "more likely"
                },
                {
                    "type": "openpi_entity",
                    "entity": "paper",
                    "attribute": "blank",
                    "change": "less likely"
                },
                {
                    "type": "openpi_entity",
                    "entity": "pencil",
                    "attribute": "in hand",
                    "change": "more likely"
                },
                {
                    "type": "openpi_entity",
                    "entity": "pencil",
                    "attribute": "on the table",
                    "change": "less likely"
                }
            ],
            [
                {
                    "type": "step",
                    "step": "Follow the outline and expand each section."
                },
                {
                    "type": "openpi_entity",
                    "entity": "outline",
                    "attribute": "extended",
                    "change": "more likely"
                },
                {
                    "type": "openpi_entity",
                    "entity": "outline",
                    "attribute": "static",
                    "change": "less likely"
                },
                {
                    "type": "openpi_entity",
                    "entity": "outline",
                    "attribute": "followed",
                    "change": "more likely"
                },
                {
                    "type": "openpi_entity",
                    "entity": "outline",
                    "attribute": "just found out",
                    "change": "less likely"
                },
                {
                    "type": "openpi_entity",
                    "entity": "material",
                    "attribute": "organized",
                    "change": "more likely"
                },
                {
                    "type": "openpi_entity",
                    "entity": "material",
                    "attribute": "disorganized",
                    "change": "less likely"
                },
                {
                    "type": "openpi_entity",
                    "entity": "section",
                    "attribute": "followed",
                    "change": "more likely"
                },
                {
                    "type": "openpi_entity",
                    "entity": "section",
                    "attribute": "unread",
                    "change": "less likely"
                }
            ],
            [
                {
                    "type": "step",
                    "step": "Read the draft essay and refine each section."
                },
                {
                    "type": "openpi_entity",
                    "entity": "essay",
                    "attribute": "read",
                    "change": "more likely"
                },
                {
                    "type": "openpi_entity",
                    "entity": "essay",
                    "attribute": "without a section",
                    "change": "less likely"
                },
                {
                    "type": "openpi_entity",
                    "entity": "section",
                    "attribute": "found",
                    "change": "more likely"
                },
                {
                    "type": "openpi_entity",
                    "entity": "section",
                    "attribute": "missing",
                    "change": "less likely"
                },
                {
                    "type": "openpi_entity",
                    "entity": "hypothesis",
                    "attribute": "tested",
                    "change": "more likely"
                },
                {
                    "type": "openpi_entity",
                    "entity": "hypothesis",
                    "attribute": "being created",
                    "change": "less likely"
                },
                {
                    "type": "openpi_entity",
                    "entity": "passage",
                    "attribute": "read",
                    "change": "more likely"
                },
                {
                    "type": "openpi_entity",
                    "entity": "passage",
                    "attribute": "untransferred",
                    "change": "less likely"
                }
            ],
            [
                {
                    "type": "step",
                    "step": "Submit the essay if needed."
                },
                {
                    "type": "entity",
                    "entity": "the essay",
                    "attribute": "finished",
                    "change": "more likely"
                }
            ]
        ]
    },
    "3": {
        "goal": "Apply for a chess tournament",
        "annotator": "Hengyan Tao",
        "steps": [
            [
                {
                    "step": "Start."
                }
            ],
            [
                {
                    "type": "step",
                    "step": "Check chessaction.com to see what tournaments available."
                },
                {
                    "type": "openpi_entity",
                    "entity": "tennis events",
                    "attribute": "present",
                    "change": "more likely"
                },
                {
                    "type": "openpi_entity",
                    "entity": "tennis events",
                    "attribute": "absent",
                    "change": "less likely"
                },
                {
                    "type": "openpi_entity",
                    "entity": "tennis",
                    "attribute": "available",
                    "change": "more likely"
                },
                {
                    "type": "openpi_entity",
                    "entity": "tennis",
                    "attribute": "missing",
                    "change": "less likely"
                },
                {
                    "type": "openpi_entity",
                    "entity": "search box",
                    "attribute": "open",
                    "change": "more likely"
                },
                {
                    "type": "openpi_entity",
                    "entity": "search box",
                    "attribute": "closed",
                    "change": "less likely"
                },
                {
                    "type": "openpi_entity",
                    "entity": "online searching",
                    "attribute": "found",
                    "change": "more likely"
                },
                {
                    "type": "openpi_entity",
                    "entity": "online searching",
                    "attribute": "unfound",
                    "change": "less likely"
                }
            ],
            [
                {
                    "type": "step",
                    "step": "Check if you can make any of the available dates."
                }
            ],
            [
                {
                    "type": "step",
                    "step": "Choose the dates you can make and follow the procedure to apply."
                },
                {
                    "type": "openpi_entity",
                    "entity": "date",
                    "attribute": "specified",
                    "change": "more likely"
                },
                {
                    "type": "openpi_entity",
                    "entity": "date",
                    "attribute": "indeterminate",
                    "change": "less likely"
                },
                {
                    "type": "openpi_entity",
                    "entity": "calendar",
                    "attribute": "present",
                    "change": "more likely"
                },
                {
                    "type": "openpi_entity",
                    "entity": "calendar",
                    "attribute": "absent",
                    "change": "less likely"
                },
                {
                    "type": "openpi_entity",
                    "entity": "date",
                    "attribute": "made",
                    "change": "more likely"
                },
                {
                    "type": "openpi_entity",
                    "entity": "date",
                    "attribute": "unmade",
                    "change": "less likely"
                }
            ],
            [
                {
                    "type": "step",
                    "step": "Receive the confirmation email that the application is successfully."
                },
                {
                    "type": "entity",
                    "entity": "the application",
                    "attribute": "finished successfully",
                    "change": "more likely"
                },
                {
                    "type": "openpi_entity",
                    "entity": "confirm email",
                    "attribute": "unclicked",
                    "change": "more likely"
                },
                {
                    "type": "openpi_entity",
                    "entity": "confirm email",
                    "attribute": "clicked",
                    "change": "less likely"
                },
                {
                    "type": "openpi_entity",
                    "entity": "confirm email",
                    "attribute": "opened",
                    "change": "more likely"
                },
                {
                    "type": "openpi_entity",
                    "entity": "confirm email",
                    "attribute": "unopened",
                    "change": "less likely"
                },
                {
                    "type": "openpi_entity",
                    "entity": "email",
                    "attribute": "accepted",
                    "change": "more likely"
                },
                {
                    "type": "openpi_entity",
                    "entity": "email",
                    "attribute": "considered",
                    "change": "less likely"
                },
                {
                    "type": "openpi_entity",
                    "entity": "email",
                    "attribute": "opened",
                    "change": "more likely"
                },
                {
                    "type": "openpi_entity",
                    "entity": "email",
                    "attribute": "unopened",
                    "change": "less likely"
                },
                {
                    "type": "openpi_entity",
                    "entity": "event registration",
                    "attribute": "opened",
                    "change": "more likely"
                },
                {
                    "type": "openpi_entity",
                    "entity": "event registration",
                    "attribute": "unopened",
                    "change": "less likely"
                }
            ]
        ]
    },
    "4": {
        "goal": "Mow the lawn",
        "annotator": "Hengyan Tao",
        "steps": [
            [
                {
                    "step": "Start."
                }
            ],
            [
                {
                    "type": "step",
                    "step": "Set up lawn mower."
                },
                {
                    "type": "openpi_entity",
                    "entity": "lawn mower",
                    "attribute": "set up",
                    "change": "more likely"
                },
                {
                    "type": "openpi_entity",
                    "entity": "lawn mower",
                    "attribute": "unset",
                    "change": "less likely"
                },
                {
                    "type": "openpi_entity",
                    "entity": "tractor",
                    "attribute": "turned on",
                    "change": "more likely"
                },
                {
                    "type": "openpi_entity",
                    "entity": "tractor",
                    "attribute": "turned off",
                    "change": "less likely"
                },
                {
                    "type": "openpi_entity",
                    "entity": "lawn mower",
                    "attribute": "set up",
                    "change": "more likely"
                },
                {
                    "type": "openpi_entity",
                    "entity": "lawn mower",
                    "attribute": "unset",
                    "change": "less likely"
                },
                {
                    "type": "openpi_entity",
                    "entity": "setting up lawn mower",
                    "attribute": "known",
                    "change": "more likely"
                },
                {
                    "type": "openpi_entity",
                    "entity": "setting up lawn mower",
                    "attribute": "unknown",
                    "change": "less likely"
                },
                {
                    "type": "openpi_entity",
                    "entity": "motor",
                    "attribute": "plugged in",
                    "change": "more likely"
                },
                {
                    "type": "openpi_entity",
                    "entity": "motor",
                    "attribute": "unplugged",
                    "change": "less likely"
                },
                {
                    "type": "openpi_entity",
                    "entity": "lawn mower",
                    "attribute": "turned on",
                    "change": "more likely"
                },
                {
                    "type": "openpi_entity",
                    "entity": "lawn mower",
                    "attribute": "turned off",
                    "change": "less likely"
                }
            ],
            [
                {
                    "type": "step",
                    "step": "Do the mowing."
                },
                {
                    "type": "entity",
                    "entity": "the lawn",
                    "attribute": "been mowed",
                    "change": "more likely"
                },
                {
                    "type": "openpi_entity",
                    "entity": "mower",
                    "attribute": "on",
                    "change": "more likely"
                },
                {
                    "type": "openpi_entity",
                    "entity": "mower",
                    "attribute": "off",
                    "change": "less likely"
                },
                {
                    "type": "openpi_entity",
                    "entity": "mower",
                    "attribute": "used",
                    "change": "more likely"
                },
                {
                    "type": "openpi_entity",
                    "entity": "mower",
                    "attribute": "unused",
                    "change": "less likely"
                },
                {
                    "type": "openpi_entity",
                    "entity": "mower",
                    "attribute": "outside the garage",
                    "change": "more likely"
                },
                {
                    "type": "openpi_entity",
                    "entity": "mower",
                    "attribute": "inside the garage",
                    "change": "less likely"
                },
                {
                    "type": "openpi_entity",
                    "entity": "mower",
                    "attribute": "in work area",
                    "change": "more likely"
                },
                {
                    "type": "openpi_entity",
                    "entity": "mower",
                    "attribute": "in garage",
                    "change": "less likely"
                },
                {
                    "type": "openpi_entity",
                    "entity": "mower",
                    "attribute": "vertical",
                    "change": "more likely"
                },
                {
                    "type": "openpi_entity",
                    "entity": "mower",
                    "attribute": "horizontal",
                    "change": "less likely"
                },
                {
                    "type": "openpi_entity",
                    "entity": "mower",
                    "attribute": "set",
                    "change": "more likely"
                },
                {
                    "type": "openpi_entity",
                    "entity": "mower",
                    "attribute": "unset",
                    "change": "less likely"
                }
            ],
            [
                {
                    "type": "step",
                    "step": "Finish Mowing."
                },
                {
                    "type": "openpi_entity",
                    "entity": "wood",
                    "attribute": "chopped",
                    "change": "more likely"
                },
                {
                    "type": "openpi_entity",
                    "entity": "wood",
                    "attribute": "whole",
                    "change": "less likely"
                },
                {
                    "type": "openpi_entity",
                    "entity": "mower",
                    "attribute": "ready",
                    "change": "more likely"
                },
                {
                    "type": "openpi_entity",
                    "entity": "mower",
                    "attribute": "unready",
                    "change": "less likely"
                },
                {
                    "type": "openpi_entity",
                    "entity": "mower",
                    "attribute": "on",
                    "change": "more likely"
                },
                {
                    "type": "openpi_entity",
                    "entity": "mower",
                    "attribute": "off",
                    "change": "less likely"
                },
                {
                    "type": "openpi_entity",
                    "entity": "mower",
                    "attribute": "running",
                    "change": "more likely"
                },
                {
                    "type": "openpi_entity",
                    "entity": "mower",
                    "attribute": "idle",
                    "change": "less likely"
                },
                {
                    "type": "openpi_entity",
                    "entity": "mower",
                    "attribute": "wet",
                    "change": "more likely"
                },
                {
                    "type": "openpi_entity",
                    "entity": "mower",
                    "attribute": "dry",
                    "change": "less likely"
                },
                {
                    "type": "openpi_entity",
                    "entity": "mower",
                    "attribute": "powered on",
                    "change": "more likely"
                },
                {
                    "type": "openpi_entity",
                    "entity": "mower",
                    "attribute": "powered down",
                    "change": "less likely"
                },
                {
                    "type": "openpi_entity",
                    "entity": "mower",
                    "attribute": "clean",
                    "change": "more likely"
                },
                {
                    "type": "openpi_entity",
                    "entity": "mower",
                    "attribute": "dirty",
                    "change": "less likely"
                }
            ]
        ]
    },
    "5": {
        "goal": "Heat pancake",
        "annotator": "Hengyan Tao",
        "steps": [
            [
                {
                    "step": "Start."
                }
            ],
            [
                {
                    "type": "step",
                    "step": "Take pancake from refrigerator."
                },
                {
                    "type": "openpi_entity",
                    "entity": "refrigerator",
                    "attribute": "less full",
                    "change": "more likely"
                },
                {
                    "type": "openpi_entity",
                    "entity": "refrigerator",
                    "attribute": "more full",
                    "change": "less likely"
                },
                {
                    "type": "openpi_entity",
                    "entity": "the pancake",
                    "attribute": "inside the refrigerator",
                    "change": "more likely"
                },
                {
                    "type": "openpi_entity",
                    "entity": "the pancake",
                    "attribute": "outside the refrigerator",
                    "change": "less likely"
                },
                {
                    "type": "openpi_entity",
                    "entity": "the pancake",
                    "attribute": "in the trash",
                    "change": "more likely"
                },
                {
                    "type": "openpi_entity",
                    "entity": "the pancake",
                    "attribute": "on the counter",
                    "change": "less likely"
                },
                {
                    "type": "openpi_entity",
                    "entity": "the plate",
                    "attribute": "heavier",
                    "change": "more likely"
                },
                {
                    "type": "openpi_entity",
                    "entity": "the plate",
                    "attribute": "lighter",
                    "change": "less likely"
                },
                {
                    "type": "openpi_entity",
                    "entity": "the plate",
                    "attribute": "on the counter",
                    "change": "more likely"
                },
                {
                    "type": "openpi_entity",
                    "entity": "the plate",
                    "attribute": "in the fridge",
                    "change": "less likely"
                },
                {
                    "type": "openpi_entity",
                    "entity": "plate",
                    "attribute": "in your hand",
                    "change": "more likely"
                },
                {
                    "type": "openpi_entity",
                    "entity": "plate",
                    "attribute": "in fridge",
                    "change": "less likely"
                },
                {
                    "type": "openpi_entity",
                    "entity": "plate",
                    "attribute": "in trash",
                    "change": "more likely"
                },
                {
                    "type": "openpi_entity",
                    "entity": "plate",
                    "attribute": "in box",
                    "change": "less likely"
                },
                {
                    "type": "openpi_entity",
                    "entity": "the plate",
                    "attribute": "on the counter",
                    "change": "more likely"
                },
                {
                    "type": "openpi_entity",
                    "entity": "the plate",
                    "attribute": "off the counter",
                    "change": "less likely"
                },
                {
                    "type": "openpi_entity",
                    "entity": "pan",
                    "attribute": "dirty",
                    "change": "more likely"
                },
                {
                    "type": "openpi_entity",
                    "entity": "pan",
                    "attribute": "clean",
                    "change": "less likely"
                },
                {
                    "type": "openpi_entity",
                    "entity": "the pancake",
                    "attribute": "in the fridge",
                    "change": "more likely"
                },
                {
                    "type": "openpi_entity",
                    "entity": "the pancake",
                    "attribute": "out of the refrigerator",
                    "change": "less likely"
                }
            ],
            [
                {
                    "type": "step",
                    "step": "Put pancake in microwave."
                },
                {
                    "type": "openpi_entity",
                    "entity": "spoon",
                    "attribute": "in microwave",
                    "change": "more likely"
                },
                {
                    "type": "openpi_entity",
                    "entity": "spoon",
                    "attribute": "in drawer",
                    "change": "less likely"
                },
                {
                    "type": "openpi_entity",
                    "entity": "the pancake",
                    "attribute": "cooler",
                    "change": "more likely"
                },
                {
                    "type": "openpi_entity",
                    "entity": "the pancake",
                    "attribute": "warmer",
                    "change": "less likely"
                },
                {
                    "type": "openpi_entity",
                    "entity": "person",
                    "attribute": "satisfied",
                    "change": "more likely"
                },
                {
                    "type": "openpi_entity",
                    "entity": "person",
                    "attribute": "hungry",
                    "change": "less likely"
                },
                {
                    "type": "openpi_entity",
                    "entity": "the pancake",
                    "attribute": "softer",
                    "change": "more likely"
                },
                {
                    "type": "openpi_entity",
                    "entity": "the pancake",
                    "attribute": "harder",
                    "change": "less likely"
                },
                {
                    "type": "openpi_entity",
                    "entity": "microwave",
                    "attribute": "on",
                    "change": "more likely"
                },
                {
                    "type": "openpi_entity",
                    "entity": "microwave",
                    "attribute": "off",
                    "change": "less likely"
                },
                {
                    "type": "openpi_entity",
                    "entity": "microwave",
                    "attribute": "full",
                    "change": "more likely"
                },
                {
                    "type": "openpi_entity",
                    "entity": "microwave",
                    "attribute": "empty",
                    "change": "less likely"
                },
                {
                    "type": "openpi_entity",
                    "entity": "pancake",
                    "attribute": "inside microwave",
                    "change": "more likely"
                },
                {
                    "type": "openpi_entity",
                    "entity": "pancake",
                    "attribute": "outside of microwave",
                    "change": "less likely"
                },
                {
                    "type": "openpi_entity",
                    "entity": "the popsicle",
                    "attribute": "inside the microwave",
                    "change": "more likely"
                },
                {
                    "type": "openpi_entity",
                    "entity": "the popsicle",
                    "attribute": "outside of the microwave",
                    "change": "less likely"
                },
                {
                    "type": "openpi_entity",
                    "entity": "the microwave",
                    "attribute": "containing the popsicle",
                    "change": "more likely"
                },
                {
                    "type": "openpi_entity",
                    "entity": "the microwave",
                    "attribute": "empty",
                    "change": "less likely"
                },
                {
                    "type": "openpi_entity",
                    "entity": "microwave",
                    "attribute": "warm",
                    "change": "more likely"
                },
                {
                    "type": "openpi_entity",
                    "entity": "microwave",
                    "attribute": "cold",
                    "change": "less likely"
                },
                {
                    "type": "openpi_entity",
                    "entity": "the microwave",
                    "attribute": "warm",
                    "change": "more likely"
                },
                {
                    "type": "openpi_entity",
                    "entity": "the microwave",
                    "attribute": "cold",
                    "change": "less likely"
                },
                {
                    "type": "openpi_entity",
                    "entity": "microwave door",
                    "attribute": "open",
                    "change": "more likely"
                },
                {
                    "type": "openpi_entity",
                    "entity": "microwave door",
                    "attribute": "closed",
                    "change": "less likely"
                },
                {
                    "type": "openpi_entity",
                    "entity": "the popsicle",
                    "attribute": "inside the microwave",
                    "change": "more likely"
                },
                {
                    "type": "openpi_entity",
                    "entity": "the popsicle",
                    "attribute": "outside of the microwave",
                    "change": "less likely"
                },
                {
                    "type": "openpi_entity",
                    "entity": "the microwave",
                    "attribute": "heavier",
                    "change": "more likely"
                },
                {
                    "type": "openpi_entity",
                    "entity": "the microwave",
                    "attribute": "lighter",
                    "change": "less likely"
                },
                {
                    "type": "openpi_entity",
                    "entity": "microwave",
                    "attribute": "hot",
                    "change": "more likely"
                },
                {
                    "type": "openpi_entity",
                    "entity": "microwave",
                    "attribute": "cold",
                    "change": "less likely"
                }
            ],
            [
                {
                    "type": "step",
                    "step": "Select reheat option in microwave and press start button."
                },
                {
                    "type": "entity",
                    "entity": "the pancake",
                    "attribute": "hot",
                    "change": "more likely"
                },
                {
                    "type": "openpi_entity",
                    "entity": "microwave",
                    "attribute": "turned on",
                    "change": "more likely"
                },
                {
                    "type": "openpi_entity",
                    "entity": "microwave",
                    "attribute": "turned off",
                    "change": "less likely"
                },
                {
                    "type": "openpi_entity",
                    "entity": "microwave",
                    "attribute": "on",
                    "change": "more likely"
                },
                {
                    "type": "openpi_entity",
                    "entity": "microwave",
                    "attribute": "off",
                    "change": "less likely"
                },
                {
                    "type": "openpi_entity",
                    "entity": "option",
                    "attribute": "full",
                    "change": "more likely"
                },
                {
                    "type": "openpi_entity",
                    "entity": "option",
                    "attribute": "empty",
                    "change": "less likely"
                },
                {
                    "type": "openpi_entity",
                    "entity": "microwave",
                    "attribute": "warm",
                    "change": "more likely"
                },
                {
                    "type": "openpi_entity",
                    "entity": "microwave",
                    "attribute": "cold",
                    "change": "less likely"
                },
                {
                    "type": "openpi_entity",
                    "entity": "button",
                    "attribute": "pressed",
                    "change": "more likely"
                },
                {
                    "type": "openpi_entity",
                    "entity": "button",
                    "attribute": "bare",
                    "change": "less likely"
                },
                {
                    "type": "openpi_entity",
                    "entity": "frying pan",
                    "attribute": "hot",
                    "change": "more likely"
                },
                {
                    "type": "openpi_entity",
                    "entity": "frying pan",
                    "attribute": "cold",
                    "change": "less likely"
                },
                {
                    "type": "openpi_entity",
                    "entity": "mixture",
                    "attribute": "hotter",
                    "change": "more likely"
                },
                {
                    "type": "openpi_entity",
                    "entity": "mixture",
                    "attribute": "cooler",
                    "change": "less likely"
                },
                {
                    "type": "openpi_entity",
                    "entity": "liquid",
                    "attribute": "cooler",
                    "change": "more likely"
                },
                {
                    "type": "openpi_entity",
                    "entity": "liquid",
                    "attribute": "warmer",
                    "change": "less likely"
                },
                {
                    "type": "openpi_entity",
                    "entity": "stove burner",
                    "attribute": "on",
                    "change": "more likely"
                },
                {
                    "type": "openpi_entity",
                    "entity": "stove burner",
                    "attribute": "off",
                    "change": "less likely"
                },
                {
                    "type": "openpi_entity",
                    "entity": "microwave",
                    "attribute": "on",
                    "change": "more likely"
                },
                {
                    "type": "openpi_entity",
                    "entity": "microwave",
                    "attribute": "off",
                    "change": "less likely"
                },
                {
                    "type": "openpi_entity",
                    "entity": "pan",
                    "attribute": "full",
                    "change": "more likely"
                },
                {
                    "type": "openpi_entity",
                    "entity": "pan",
                    "attribute": "empty",
                    "change": "less likely"
                }
            ],
            [
                {
                    "type": "step",
                    "step": "After 2 minutes, Let the pancake rest and take it out from microwave."
                },
                {
                    "type": "openpi_entity",
                    "entity": "pancake",
                    "attribute": "outside fridge",
                    "change": "more likely"
                },
                {
                    "type": "openpi_entity",
                    "entity": "pancake",
                    "attribute": "inside fridge",
                    "change": "less likely"
                },
                {
                    "type": "openpi_entity",
                    "entity": "microwave",
                    "attribute": "full",
                    "change": "more likely"
                },
                {
                    "type": "openpi_entity",
                    "entity": "microwave",
                    "attribute": "empty",
                    "change": "less likely"
                },
                {
                    "type": "openpi_entity",
                    "entity": "the pancake",
                    "attribute": "out of the microwave",
                    "change": "more likely"
                },
                {
                    "type": "openpi_entity",
                    "entity": "the pancake",
                    "attribute": "inside the microwave",
                    "change": "less likely"
                },
                {
                    "type": "openpi_entity",
                    "entity": "food",
                    "attribute": "cooler",
                    "change": "more likely"
                },
                {
                    "type": "openpi_entity",
                    "entity": "food",
                    "attribute": "warmer",
                    "change": "less likely"
                },
                {
                    "type": "openpi_entity",
                    "entity": "meal",
                    "attribute": "cooling",
                    "change": "more likely"
                },
                {
                    "type": "openpi_entity",
                    "entity": "meal",
                    "attribute": "warm",
                    "change": "less likely"
                },
                {
                    "type": "openpi_entity",
                    "entity": "the pancake",
                    "attribute": "outside the microwave",
                    "change": "more likely"
                },
                {
                    "type": "openpi_entity",
                    "entity": "the pancake",
                    "attribute": "inside the microwave",
                    "change": "less likely"
                },
                {
                    "type": "openpi_entity",
                    "entity": "mixture",
                    "attribute": "warmer",
                    "change": "more likely"
                },
                {
                    "type": "openpi_entity",
                    "entity": "mixture",
                    "attribute": "cooler",
                    "change": "less likely"
                },
                {
                    "type": "openpi_entity",
                    "entity": "microwave",
                    "attribute": "heavier",
                    "change": "more likely"
                },
                {
                    "type": "openpi_entity",
                    "entity": "microwave",
                    "attribute": "light",
                    "change": "less likely"
                },
                {
                    "type": "openpi_entity",
                    "entity": "the pancake",
                    "attribute": "cooler",
                    "change": "more likely"
                },
                {
                    "type": "openpi_entity",
                    "entity": "the pancake",
                    "attribute": "warmer",
                    "change": "less likely"
                }
            ]
        ]
    },
    "6": {
        "goal": "Wash your hands",
        "annotator": "Hengyan Tao",
        "steps": [
            [
                {
                    "step": "Start."
                }
            ],
            [
                {
                    "type": "step",
                    "step": "Wet hands with running water."
                },
                {
                    "type": "openpi_entity",
                    "entity": "running water",
                    "attribute": "wet",
                    "change": "more likely"
                },
                {
                    "type": "openpi_entity",
                    "entity": "running water",
                    "attribute": "dry",
                    "change": "less likely"
                },
                {
                    "type": "openpi_entity",
                    "entity": "hand",
                    "attribute": "wet",
                    "change": "more likely"
                },
                {
                    "type": "openpi_entity",
                    "entity": "hand",
                    "attribute": "dry",
                    "change": "less likely"
                },
                {
                    "type": "openpi_entity",
                    "entity": "water",
                    "attribute": "in container",
                    "change": "more likely"
                },
                {
                    "type": "openpi_entity",
                    "entity": "water",
                    "attribute": "in faucet",
                    "change": "less likely"
                }
            ],
            [
                {
                    "type": "step",
                    "step": "Get soap and scrub."
                },
                {
                    "type": "entity",
                    "entity": "the hands",
                    "attribute": "clean",
                    "change": "more likely"
                },
                {
                    "type": "openpi_entity",
                    "entity": "water",
                    "attribute": "in drain",
                    "change": "more likely"
                },
                {
                    "type": "openpi_entity",
                    "entity": "water",
                    "attribute": "in faucet",
                    "change": "less likely"
                },
                {
                    "type": "openpi_entity",
                    "entity": "soap",
                    "attribute": "separated",
                    "change": "more likely"
                },
                {
                    "type": "openpi_entity",
                    "entity": "soap",
                    "attribute": "mixed",
                    "change": "less likely"
                },
                {
                    "type": "openpi_entity",
                    "entity": "soap",
                    "attribute": "separated",
                    "change": "more likely"
                },
                {
                    "type": "openpi_entity",
                    "entity": "soap",
                    "attribute": "mixed",
                    "change": "less likely"
                },
                {
                    "type": "openpi_entity",
                    "entity": "soap",
                    "attribute": "on hands",
                    "change": "more likely"
                },
                {
                    "type": "openpi_entity",
                    "entity": "soap",
                    "attribute": "in bottle",
                    "change": "less likely"
                },
                {
                    "type": "openpi_entity",
                    "entity": "soap",
                    "attribute": "on the hands",
                    "change": "more likely"
                },
                {
                    "type": "openpi_entity",
                    "entity": "soap",
                    "attribute": "in the bottle",
                    "change": "less likely"
                },
                {
                    "type": "openpi_entity",
                    "entity": "soap container",
                    "attribute": "less full",
                    "change": "more likely"
                },
                {
                    "type": "openpi_entity",
                    "entity": "soap container",
                    "attribute": "full",
                    "change": "less likely"
                },
                {
                    "type": "openpi_entity",
                    "entity": "soap",
                    "attribute": "on sink",
                    "change": "more likely"
                },
                {
                    "type": "openpi_entity",
                    "entity": "soap",
                    "attribute": "in bottle",
                    "change": "less likely"
                }
            ],
            [
                {
                    "type": "step",
                    "step": "Rinse and dry."
                },
                {
                    "type": "openpi_entity",
                    "entity": "water",
                    "attribute": "in drain",
                    "change": "more likely"
                },
                {
                    "type": "openpi_entity",
                    "entity": "water",
                    "attribute": "in faucet",
                    "change": "less likely"
                },
                {
                    "type": "openpi_entity",
                    "entity": "face",
                    "attribute": "rinsed",
                    "change": "more likely"
                },
                {
                    "type": "openpi_entity",
                    "entity": "face",
                    "attribute": "soapy",
                    "change": "less likely"
                },
                {
                    "type": "openpi_entity",
                    "entity": "soap",
                    "attribute": "on hands",
                    "change": "more likely"
                },
                {
                    "type": "openpi_entity",
                    "entity": "soap",
                    "attribute": "in bottle",
                    "change": "less likely"
                },
                {
                    "type": "openpi_entity",
                    "entity": "soap",
                    "attribute": "in drain",
                    "change": "more likely"
                },
                {
                    "type": "openpi_entity",
                    "entity": "soap",
                    "attribute": "in bathroom",
                    "change": "less likely"
                },
                {
                    "type": "openpi_entity",
                    "entity": "soap",
                    "attribute": "dry",
                    "change": "more likely"
                },
                {
                    "type": "openpi_entity",
                    "entity": "soap",
                    "attribute": "wet",
                    "change": "less likely"
                }
            ]
        ]
    },
    "7": {
        "goal": "Buy a ticket from SF to Hawaii",
        "annotator": "Hengyan Tao",
        "steps": [
            [
                {
                    "step": "Start."
                }
            ],
            [
                {
                    "type": "step",
                    "step": "Open google flights and check the flights availability during the dates wanted."
                },
                {
                    "type": "openpi_entity",
                    "entity": "airport",
                    "attribute": "chosen",
                    "change": "more likely"
                },
                {
                    "type": "openpi_entity",
                    "entity": "airport",
                    "attribute": "unchosen",
                    "change": "less likely"
                },
                {
                    "type": "openpi_entity",
                    "entity": "airport availability",
                    "attribute": "known",
                    "change": "more likely"
                },
                {
                    "type": "openpi_entity",
                    "entity": "airport availability",
                    "attribute": "unknown",
                    "change": "less likely"
                },
                {
                    "type": "openpi_entity",
                    "entity": "search for \"buses\"",
                    "attribute": "opened",
                    "change": "more likely"
                },
                {
                    "type": "openpi_entity",
                    "entity": "search for \"buses\"",
                    "attribute": "unopened",
                    "change": "less likely"
                },
                {
                    "type": "openpi_entity",
                    "entity": "airport",
                    "attribute": "present",
                    "change": "more likely"
                },
                {
                    "type": "openpi_entity",
                    "entity": "airport",
                    "attribute": "absent",
                    "change": "less likely"
                },
                {
                    "type": "openpi_entity",
                    "entity": "google page for buses",
                    "attribute": "loading",
                    "change": "more likely"
                },
                {
                    "type": "openpi_entity",
                    "entity": "google page for buses",
                    "attribute": "loading",
                    "change": "less likely"
                },
                {
                    "type": "openpi_entity",
                    "entity": "airport information",
                    "attribute": "available",
                    "change": "more likely"
                },
                {
                    "type": "openpi_entity",
                    "entity": "airport information",
                    "attribute": "unavailable",
                    "change": "less likely"
                },
                {
                    "type": "openpi_entity",
                    "entity": "airline schedule",
                    "attribute": "read",
                    "change": "more likely"
                },
                {
                    "type": "openpi_entity",
                    "entity": "airline schedule",
                    "attribute": "unread",
                    "change": "less likely"
                }
            ],
            [
                {
                    "type": "step",
                    "step": "Choose non-stop flights and check if the time slots work."
                },
                {
                    "type": "openpi_entity",
                    "entity": "airline time zone differential",
                    "attribute": "present",
                    "change": "more likely"
                },
                {
                    "type": "openpi_entity",
                    "entity": "airline time zone differential",
                    "attribute": "absent",
                    "change": "less likely"
                },
                {
                    "type": "openpi_entity",
                    "entity": "airline schedule",
                    "attribute": "found",
                    "change": "more likely"
                },
                {
                    "type": "openpi_entity",
                    "entity": "airline schedule",
                    "attribute": "unfound",
                    "change": "less likely"
                },
                {
                    "type": "openpi_entity",
                    "entity": "airline",
                    "attribute": "online",
                    "change": "more likely"
                },
                {
                    "type": "openpi_entity",
                    "entity": "airline",
                    "attribute": "offline",
                    "change": "less likely"
                }
            ],
            [
                {
                    "type": "step",
                    "step": "After deciding right time slots and price, proceed to buy tickets."
                },
                {
                    "type": "openpi_entity",
                    "entity": "price",
                    "attribute": "selected",
                    "change": "more likely"
                },
                {
                    "type": "openpi_entity",
                    "entity": "price",
                    "attribute": "unselected",
                    "change": "less likely"
                },
                {
                    "type": "openpi_entity",
                    "entity": "ticket",
                    "attribute": "purchased",
                    "change": "more likely"
                },
                {
                    "type": "openpi_entity",
                    "entity": "ticket",
                    "attribute": "unpurchased",
                    "change": "less likely"
                },
                {
                    "type": "openpi_entity",
                    "entity": "buy/sell button",
                    "attribute": "clicked",
                    "change": "more likely"
                },
                {
                    "type": "openpi_entity",
                    "entity": "buy/sell button",
                    "attribute": "unclicked",
                    "change": "less likely"
                },
                {
                    "type": "openpi_entity",
                    "entity": "ticket",
                    "attribute": "absent",
                    "change": "more likely"
                },
                {
                    "type": "openpi_entity",
                    "entity": "ticket",
                    "attribute": "occupied",
                    "change": "less likely"
                },
                {
                    "type": "openpi_entity",
                    "entity": "ticket price",
                    "attribute": "selected",
                    "change": "more likely"
                },
                {
                    "type": "openpi_entity",
                    "entity": "ticket price",
                    "attribute": "unselected",
                    "change": "less likely"
                },
                {
                    "type": "openpi_entity",
                    "entity": "buy/sell button",
                    "attribute": "clicked",
                    "change": "more likely"
                },
                {
                    "type": "openpi_entity",
                    "entity": "buy/sell button",
                    "attribute": "unclicked",
                    "change": "less likely"
                },
                {
                    "type": "openpi_entity",
                    "entity": "airline ticket price",
                    "attribute": "selected",
                    "change": "more likely"
                },
                {
                    "type": "openpi_entity",
                    "entity": "airline ticket price",
                    "attribute": "unselected",
                    "change": "less likely"
                }
            ],
            [
                {
                    "type": "step",
                    "step": "Got an email notification that the ticket is ready."
                },
                {
                    "type": "entity",
                    "entity": "the ticket",
                    "attribute": "ready",
                    "change": "more likely"
                },
                {
                    "type": "openpi_entity",
                    "entity": "email notification",
                    "attribute": "clicked",
                    "change": "more likely"
                },
                {
                    "type": "openpi_entity",
                    "entity": "email notification",
                    "attribute": "unclicked",
                    "change": "less likely"
                },
                {
                    "type": "openpi_entity",
                    "entity": "ticket",
                    "attribute": "unclicked",
                    "change": "more likely"
                },
                {
                    "type": "openpi_entity",
                    "entity": "ticket",
                    "attribute": "clicked",
                    "change": "less likely"
                },
                {
                    "type": "openpi_entity",
                    "entity": "email",
                    "attribute": "read",
                    "change": "more likely"
                },
                {
                    "type": "openpi_entity",
                    "entity": "email",
                    "attribute": "unread",
                    "change": "less likely"
                },
                {
                    "type": "openpi_entity",
                    "entity": "airline ticket",
                    "attribute": "purchased",
                    "change": "more likely"
                },
                {
                    "type": "openpi_entity",
                    "entity": "airline ticket",
                    "attribute": "on sale",
                    "change": "less likely"
                }
            ]
        ]
    },
    "8": {
        "goal": "Drive to Los Angelas",
        "annotator": "Hengyan Tao",
        "steps": [
            [
                {
                    "step": "Start."
                }
            ],
            [
                {
                    "type": "step",
                    "step": "Fuel your car and make sure there is enough gasoline."
                },
                {
                    "type": "openpi_entity",
                    "entity": "gas tank",
                    "attribute": "empty",
                    "change": "more likely"
                },
                {
                    "type": "openpi_entity",
                    "entity": "gas tank",
                    "attribute": "full of gas",
                    "change": "less likely"
                },
                {
                    "type": "openpi_entity",
                    "entity": "fuel",
                    "attribute": "combined",
                    "change": "more likely"
                },
                {
                    "type": "openpi_entity",
                    "entity": "fuel",
                    "attribute": "separate",
                    "change": "less likely"
                },
                {
                    "type": "openpi_entity",
                    "entity": "stove",
                    "attribute": "turned on",
                    "change": "more likely"
                },
                {
                    "type": "openpi_entity",
                    "entity": "stove",
                    "attribute": "turned off",
                    "change": "less likely"
                },
                {
                    "type": "openpi_entity",
                    "entity": "the tank",
                    "attribute": "lighter",
                    "change": "more likely"
                },
                {
                    "type": "openpi_entity",
                    "entity": "the tank",
                    "attribute": "heavier",
                    "change": "less likely"
                },
                {
                    "type": "openpi_entity",
                    "entity": "gasoline",
                    "attribute": "invisible",
                    "change": "more likely"
                },
                {
                    "type": "openpi_entity",
                    "entity": "gasoline",
                    "attribute": "visible",
                    "change": "less likely"
                },
                {
                    "type": "openpi_entity",
                    "entity": "gasoline",
                    "attribute": "melted",
                    "change": "more likely"
                },
                {
                    "type": "openpi_entity",
                    "entity": "gasoline",
                    "attribute": "solid",
                    "change": "less likely"
                },
                {
                    "type": "openpi_entity",
                    "entity": "car",
                    "attribute": "turned on",
                    "change": "more likely"
                },
                {
                    "type": "openpi_entity",
                    "entity": "car",
                    "attribute": "turned off",
                    "change": "less likely"
                },
                {
                    "type": "openpi_entity",
                    "entity": "the car",
                    "attribute": "heavier",
                    "change": "more likely"
                },
                {
                    "type": "openpi_entity",
                    "entity": "the car",
                    "attribute": "lighter",
                    "change": "less likely"
                },
                {
                    "type": "openpi_entity",
                    "entity": "gasoline",
                    "attribute": "in car",
                    "change": "more likely"
                },
                {
                    "type": "openpi_entity",
                    "entity": "gasoline",
                    "attribute": "in bottle",
                    "change": "less likely"
                },
                {
                    "type": "openpi_entity",
                    "entity": "car",
                    "attribute": "on",
                    "change": "more likely"
                },
                {
                    "type": "openpi_entity",
                    "entity": "car",
                    "attribute": "off",
                    "change": "less likely"
                },
                {
                    "type": "openpi_entity",
                    "entity": "engine",
                    "attribute": "cool",
                    "change": "more likely"
                },
                {
                    "type": "openpi_entity",
                    "entity": "engine",
                    "attribute": "hot",
                    "change": "less likely"
                },
                {
                    "type": "openpi_entity",
                    "entity": "fuel",
                    "attribute": "burned",
                    "change": "more likely"
                },
                {
                    "type": "openpi_entity",
                    "entity": "fuel",
                    "attribute": "in bottle",
                    "change": "less likely"
                },
                {
                    "type": "openpi_entity",
                    "entity": "the gasoline",
                    "attribute": "in the car",
                    "change": "more likely"
                },
                {
                    "type": "openpi_entity",
                    "entity": "the gasoline",
                    "attribute": "in the bottle",
                    "change": "less likely"
                }
            ],
            [
                {
                    "type": "step",
                    "step": "Hit the I5 road on the way to LA and drive safely."
                },
                {
                    "type": "openpi_entity",
                    "entity": "i5",
                    "attribute": "approaching LA",
                    "change": "more likely"
                },
                {
                    "type": "openpi_entity",
                    "entity": "i5",
                    "attribute": "traveling slowly",
                    "change": "less likely"
                },
                {
                    "type": "openpi_entity",
                    "entity": "car",
                    "attribute": "in drive",
                    "change": "more likely"
                },
                {
                    "type": "openpi_entity",
                    "entity": "car",
                    "attribute": "at rest",
                    "change": "less likely"
                },
                {
                    "type": "openpi_entity",
                    "entity": "car",
                    "attribute": "warm",
                    "change": "more likely"
                },
                {
                    "type": "openpi_entity",
                    "entity": "car",
                    "attribute": "cool",
                    "change": "less likely"
                },
                {
                    "type": "openpi_entity",
                    "entity": "engine",
                    "attribute": "running",
                    "change": "more likely"
                },
                {
                    "type": "openpi_entity",
                    "entity": "engine",
                    "attribute": "off",
                    "change": "less likely"
                },
                {
                    "type": "openpi_entity",
                    "entity": "i5",
                    "attribute": "traveling west on road",
                    "change": "more likely"
                },
                {
                    "type": "openpi_entity",
                    "entity": "i5",
                    "attribute": "traveling east on road",
                    "change": "less likely"
                },
                {
                    "type": "openpi_entity",
                    "entity": "hood",
                    "attribute": "up",
                    "change": "more likely"
                },
                {
                    "type": "openpi_entity",
                    "entity": "hood",
                    "attribute": "down",
                    "change": "less likely"
                },
                {
                    "type": "openpi_entity",
                    "entity": "road",
                    "attribute": "occupied",
                    "change": "more likely"
                },
                {
                    "type": "openpi_entity",
                    "entity": "road",
                    "attribute": "unoccupied",
                    "change": "less likely"
                },
                {
                    "type": "openpi_entity",
                    "entity": "i5 from LA",
                    "attribute": "moving at low speed",
                    "change": "more likely"
                },
                {
                    "type": "openpi_entity",
                    "entity": "i5 from LA",
                    "attribute": "parked at speed",
                    "change": "less likely"
                },
                {
                    "type": "openpi_entity",
                    "entity": "car",
                    "attribute": "heavier",
                    "change": "more likely"
                },
                {
                    "type": "openpi_entity",
                    "entity": "car",
                    "attribute": "lighter",
                    "change": "less likely"
                },
                {
                    "type": "openpi_entity",
                    "entity": "car",
                    "attribute": "on",
                    "change": "more likely"
                },
                {
                    "type": "openpi_entity",
                    "entity": "car",
                    "attribute": "off",
                    "change": "less likely"
                },
                {
                    "type": "openpi_entity",
                    "entity": "road",
                    "attribute": "repaired",
                    "change": "more likely"
                },
                {
                    "type": "openpi_entity",
                    "entity": "road",
                    "attribute": "punctured",
                    "change": "less likely"
                },
                {
                    "type": "openpi_entity",
                    "entity": "hood",
                    "attribute": "up",
                    "change": "more likely"
                },
                {
                    "type": "openpi_entity",
                    "entity": "hood",
                    "attribute": "down",
                    "change": "less likely"
                }
            ],
            [
                {
                    "type": "step",
                    "step": "You see a sign Welcome to LA."
                },
                {
                    "type": "entity",
                    "entity": "you",
                    "attribute": "in LA",
                    "change": "more likely"
                }
            ]
        ]
    },
    "9": {
        "goal": "Boating in lake",
        "annotator": "Hengyan Tao",
        "steps": [
            [
                {
                    "step": "Start."
                }
            ],
            [
                {
                    "type": "step",
                    "step": "Rent a boat."
                },
                {
                    "type": "openpi_entity",
                    "entity": "boat",
                    "attribute": "is now bought",
                    "change": "more likely"
                },
                {
                    "type": "openpi_entity",
                    "entity": "boat",
                    "attribute": "bought",
                    "change": "less likely"
                },
                {
                    "type": "openpi_entity",
                    "entity": "boat",
                    "attribute": "purchased from store",
                    "change": "more likely"
                },
                {
                    "type": "openpi_entity",
                    "entity": "boat",
                    "attribute": "on sale in store",
                    "change": "less likely"
                },
                {
                    "type": "openpi_entity",
                    "entity": "boat",
                    "attribute": "present",
                    "change": "more likely"
                },
                {
                    "type": "openpi_entity",
                    "entity": "boat",
                    "attribute": "absent",
                    "change": "less likely"
                },
                {
                    "type": "openpi_entity",
                    "entity": "person",
                    "attribute": "now in possession of boat",
                    "change": "more likely"
                },
                {
                    "type": "openpi_entity",
                    "entity": "person",
                    "attribute": "in need of boat",
                    "change": "less likely"
                },
                {
                    "type": "openpi_entity",
                    "entity": "boat",
                    "attribute": "at home",
                    "change": "more likely"
                },
                {
                    "type": "openpi_entity",
                    "entity": "boat",
                    "attribute": "at store",
                    "change": "less likely"
                }
            ],
            [
                {
                    "type": "step",
                    "step": "Find a lake which allows boating."
                },
                {
                    "type": "openpi_entity",
                    "entity": "boating",
                    "attribute": "in lake",
                    "change": "more likely"
                },
                {
                    "type": "openpi_entity",
                    "entity": "boating",
                    "attribute": "at store",
                    "change": "less likely"
                },
                {
                    "type": "openpi_entity",
                    "entity": "lake",
                    "attribute": "discovered",
                    "change": "more likely"
                },
                {
                    "type": "openpi_entity",
                    "entity": "lake",
                    "attribute": "undiscovered",
                    "change": "less likely"
                },
                {
                    "type": "openpi_entity",
                    "entity": "boating",
                    "attribute": "found",
                    "change": "more likely"
                },
                {
                    "type": "openpi_entity",
                    "entity": "boating",
                    "attribute": "missing",
                    "change": "less likely"
                },
                {
                    "type": "openpi_entity",
                    "entity": "boat",
                    "attribute": "shiny",
                    "change": "more likely"
                },
                {
                    "type": "openpi_entity",
                    "entity": "boat",
                    "attribute": "dull",
                    "change": "less likely"
                },
                {
                    "type": "openpi_entity",
                    "entity": "lake",
                    "attribute": "owned by the shopper",
                    "change": "more likely"
                },
                {
                    "type": "openpi_entity",
                    "entity": "lake",
                    "attribute": "owned by the store",
                    "change": "less likely"
                },
                {
                    "type": "openpi_entity",
                    "entity": "boat",
                    "attribute": "near boat",
                    "change": "more likely"
                },
                {
                    "type": "openpi_entity",
                    "entity": "boat",
                    "attribute": "away from boat",
                    "change": "less likely"
                }
            ],
            [
                {
                    "type": "step",
                    "step": "Drive to the lake and set the boat in lake."
                },
                {
                    "type": "entity",
                    "entity": "the boat",
                    "attribute": "in lake",
                    "change": "more likely"
                },
                {
                    "type": "openpi_entity",
                    "entity": "engine",
                    "attribute": "warm",
                    "change": "more likely"
                },
                {
                    "type": "openpi_entity",
                    "entity": "engine",
                    "attribute": "hot",
                    "change": "less likely"
                },
                {
                    "type": "openpi_entity",
                    "entity": "boat",
                    "attribute": "at lake",
                    "change": "more likely"
                },
                {
                    "type": "openpi_entity",
                    "entity": "boat",
                    "attribute": "at home",
                    "change": "less likely"
                },
                {
                    "type": "openpi_entity",
                    "entity": "boat",
                    "attribute": "turning",
                    "change": "more likely"
                },
                {
                    "type": "openpi_entity",
                    "entity": "boat",
                    "attribute": "stationary",
                    "change": "less likely"
                },
                {
                    "type": "openpi_entity",
                    "entity": "boat",
                    "attribute": "cold",
                    "change": "more likely"
                },
                {
                    "type": "openpi_entity",
                    "entity": "boat",
                    "attribute": "warm",
                    "change": "less likely"
                },
                {
                    "type": "openpi_entity",
                    "entity": "person",
                    "attribute": "in the water",
                    "change": "more likely"
                },
                {
                    "type": "openpi_entity",
                    "entity": "person",
                    "attribute": "out of the water",
                    "change": "less likely"
                },
                {
                    "type": "openpi_entity",
                    "entity": "boat",
                    "attribute": "set in lake",
                    "change": "more likely"
                },
                {
                    "type": "openpi_entity",
                    "entity": "boat",
                    "attribute": "at home",
                    "change": "less likely"
                },
                {
                    "type": "openpi_entity",
                    "entity": "air in lake",
                    "attribute": "full of holes",
                    "change": "more likely"
                },
                {
                    "type": "openpi_entity",
                    "entity": "air in lake",
                    "attribute": "empty",
                    "change": "less likely"
                },
                {
                    "type": "openpi_entity",
                    "entity": "engine",
                    "attribute": "on",
                    "change": "more likely"
                },
                {
                    "type": "openpi_entity",
                    "entity": "engine",
                    "attribute": "off",
                    "change": "less likely"
                }
            ],
            [
                {
                    "type": "step",
                    "step": "Enjoy the boating."
                },
                {
                    "type": "openpi_entity",
                    "entity": "enjoyment",
                    "attribute": "present",
                    "change": "more likely"
                },
                {
                    "type": "openpi_entity",
                    "entity": "enjoyment",
                    "attribute": "absent",
                    "change": "less likely"
                },
                {
                    "type": "openpi_entity",
                    "entity": "boat",
                    "attribute": "in the evening",
                    "change": "more likely"
                },
                {
                    "type": "openpi_entity",
                    "entity": "boat",
                    "attribute": "in the morning",
                    "change": "less likely"
                },
                {
                    "type": "openpi_entity",
                    "entity": "person",
                    "attribute": "knowledgeable",
                    "change": "more likely"
                },
                {
                    "type": "openpi_entity",
                    "entity": "person",
                    "attribute": "ignorant of everything",
                    "change": "less likely"
                },
                {
                    "type": "openpi_entity",
                    "entity": "boating",
                    "attribute": "balanced",
                    "change": "more likely"
                },
                {
                    "type": "openpi_entity",
                    "entity": "boating",
                    "attribute": "unbalanced",
                    "change": "less likely"
                },
                {
                    "type": "openpi_entity",
                    "entity": "boating",
                    "attribute": "present",
                    "change": "more likely"
                },
                {
                    "type": "openpi_entity",
                    "entity": "boating",
                    "attribute": "absent",
                    "change": "less likely"
                }
            ]
        ]
    },
    "10": {
        "goal": "Implement a code function",
        "annotator": "Hengyan Tao",
        "steps": [
            [
                {
                    "step": "Start."
                }
            ],
            [
                {
                    "type": "step",
                    "step": "Decide what functionality the function needs to implement and the API."
                },
                {
                    "type": "openpi_entity",
                    "entity": "hypothesis",
                    "attribute": "tested",
                    "change": "more likely"
                },
                {
                    "type": "openpi_entity",
                    "entity": "hypothesis",
                    "attribute": "created",
                    "change": "less likely"
                },
                {
                    "type": "openpi_entity",
                    "entity": "functionality",
                    "attribute": "defined",
                    "change": "more likely"
                },
                {
                    "type": "openpi_entity",
                    "entity": "functionality",
                    "attribute": "undefined",
                    "change": "less likely"
                },
                {
                    "type": "openpi_entity",
                    "entity": "documentation",
                    "attribute": "present",
                    "change": "more likely"
                },
                {
                    "type": "openpi_entity",
                    "entity": "documentation",
                    "attribute": "absent",
                    "change": "less likely"
                },
                {
                    "type": "openpi_entity",
                    "entity": "documentation",
                    "attribute": "found",
                    "change": "more likely"
                },
                {
                    "type": "openpi_entity",
                    "entity": "documentation",
                    "attribute": "absent",
                    "change": "less likely"
                },
                {
                    "type": "openpi_entity",
                    "entity": "functionality",
                    "attribute": "defined",
                    "change": "more likely"
                },
                {
                    "type": "openpi_entity",
                    "entity": "functionality",
                    "attribute": "undefined",
                    "change": "less likely"
                }
            ],
            [
                {
                    "type": "step",
                    "step": "Decide what\u2019s the input and output parameters of the function."
                },
                {
                    "type": "openpi_entity",
                    "entity": "function",
                    "attribute": "implemented",
                    "change": "more likely"
                },
                {
                    "type": "openpi_entity",
                    "entity": "function",
                    "attribute": "considered",
                    "change": "less likely"
                },
                {
                    "type": "openpi_entity",
                    "entity": "step",
                    "attribute": "known",
                    "change": "more likely"
                },
                {
                    "type": "openpi_entity",
                    "entity": "step",
                    "attribute": "unknown",
                    "change": "less likely"
                }
            ],
            [
                {
                    "type": "step",
                    "step": "Implement the function."
                },
                {
                    "type": "entity",
                    "entity": "the function",
                    "attribute": "implemented",
                    "change": "more likely"
                },
                {
                    "type": "openpi_entity",
                    "entity": "functionality",
                    "attribute": "implemented",
                    "change": "more likely"
                },
                {
                    "type": "openpi_entity",
                    "entity": "functionality",
                    "attribute": "considered",
                    "change": "less likely"
                },
                {
                    "type": "openpi_entity",
                    "entity": "function",
                    "attribute": "made",
                    "change": "more likely"
                },
                {
                    "type": "openpi_entity",
                    "entity": "function",
                    "attribute": "unmade",
                    "change": "less likely"
                }
            ],
            [
                {
                    "type": "step",
                    "step": "After implementation, do unit test, API test and system test."
                },
                {
                    "type": "openpi_entity",
                    "entity": "system test",
                    "attribute": "complete",
                    "change": "more likely"
                },
                {
                    "type": "openpi_entity",
                    "entity": "system test",
                    "attribute": "incomplete",
                    "change": "less likely"
                },
                {
                    "type": "openpi_entity",
                    "entity": "what unit test",
                    "attribute": "is present",
                    "change": "more likely"
                },
                {
                    "type": "openpi_entity",
                    "entity": "what unit test",
                    "attribute": "absent",
                    "change": "less likely"
                },
                {
                    "type": "openpi_entity",
                    "entity": "test",
                    "attribute": "completed",
                    "change": "more likely"
                },
                {
                    "type": "openpi_entity",
                    "entity": "test",
                    "attribute": "incomplete",
                    "change": "less likely"
                },
                {
                    "type": "openpi_entity",
                    "entity": "unit test",
                    "attribute": "completed",
                    "change": "more likely"
                },
                {
                    "type": "openpi_entity",
                    "entity": "unit test",
                    "attribute": "incomplete",
                    "change": "less likely"
                }
            ]
        ]
    },
    "11": {
        "goal": "\u00ef\u00bb\u00bfMaking a Virgin Strawberry Daiquiri",
        "annotator": "kuan wei",
        "steps": [
            [
                {
                    "step": "Start."
                }
            ],
            [
                {
                    "type": "step",
                    "step": "Fill a blender with cracked ice."
                },
                {
                    "type": "openpi_entity",
                    "entity": "blender",
                    "attribute": "filled with ice",
                    "change": "more likely"
                },
                {
                    "type": "openpi_entity",
                    "entity": "blender",
                    "attribute": "empty",
                    "change": "less likely"
                },
                {
                    "type": "openpi_entity",
                    "entity": "blender",
                    "attribute": "warming",
                    "change": "more likely"
                },
                {
                    "type": "openpi_entity",
                    "entity": "blender",
                    "attribute": "cold",
                    "change": "less likely"
                },
                {
                    "type": "openpi_entity",
                    "entity": "blender",
                    "attribute": "full",
                    "change": "more likely"
                },
                {
                    "type": "openpi_entity",
                    "entity": "blender",
                    "attribute": "empty",
                    "change": "less likely"
                },
                {
                    "type": "openpi_entity",
                    "entity": "cracker",
                    "attribute": "in the blender",
                    "change": "more likely"
                },
                {
                    "type": "openpi_entity",
                    "entity": "cracker",
                    "attribute": "in the box",
                    "change": "less likely"
                },
                {
                    "type": "openpi_entity",
                    "entity": "ice",
                    "attribute": "larger",
                    "change": "more likely"
                },
                {
                    "type": "openpi_entity",
                    "entity": "ice",
                    "attribute": "smaller",
                    "change": "less likely"
                },
                {
                    "type": "openpi_entity",
                    "entity": "ice",
                    "attribute": "cracked",
                    "change": "more likely"
                },
                {
                    "type": "openpi_entity",
                    "entity": "ice",
                    "attribute": "whole",
                    "change": "less likely"
                },
                {
                    "type": "openpi_entity",
                    "entity": "ice",
                    "attribute": "inside blender",
                    "change": "more likely"
                },
                {
                    "type": "openpi_entity",
                    "entity": "ice",
                    "attribute": "outside of blender",
                    "change": "less likely"
                },
                {
                    "type": "openpi_entity",
                    "entity": "ice",
                    "attribute": "inside blender",
                    "change": "more likely"
                },
                {
                    "type": "openpi_entity",
                    "entity": "ice",
                    "attribute": "outside of blender",
                    "change": "less likely"
                },
                {
                    "type": "openpi_entity",
                    "entity": "blender",
                    "attribute": "wet",
                    "change": "more likely"
                },
                {
                    "type": "openpi_entity",
                    "entity": "blender",
                    "attribute": "dry",
                    "change": "less likely"
                }
            ],
            [
                {
                    "type": "step",
                    "step": "Cut and slice 3 ounces (90 grams) of strawberries."
                },
                {
                    "type": "openpi_entity",
                    "entity": "fruit",
                    "attribute": "thinner",
                    "change": "more likely"
                },
                {
                    "type": "openpi_entity",
                    "entity": "fruit",
                    "attribute": "thicker",
                    "change": "less likely"
                },
                {
                    "type": "openpi_entity",
                    "entity": "cutting board",
                    "attribute": "dirty",
                    "change": "more likely"
                },
                {
                    "type": "openpi_entity",
                    "entity": "cutting board",
                    "attribute": "clean",
                    "change": "less likely"
                },
                {
                    "type": "openpi_entity",
                    "entity": "blender",
                    "attribute": "wet",
                    "change": "more likely"
                },
                {
                    "type": "openpi_entity",
                    "entity": "blender",
                    "attribute": "dry",
                    "change": "less likely"
                },
                {
                    "type": "openpi_entity",
                    "entity": "knife",
                    "attribute": "dirty",
                    "change": "more likely"
                },
                {
                    "type": "openpi_entity",
                    "entity": "knife",
                    "attribute": "clean",
                    "change": "less likely"
                },
                {
                    "type": "openpi_entity",
                    "entity": "knife",
                    "attribute": "wet",
                    "change": "more likely"
                },
                {
                    "type": "openpi_entity",
                    "entity": "knife",
                    "attribute": "dry",
                    "change": "less likely"
                }
            ],
            [
                {
                    "type": "step",
                    "step": "Add the strawberries to the blender, along with the sugar and lime juice."
                },
                {
                    "type": "openpi_entity",
                    "entity": "lime juice",
                    "attribute": "in blender",
                    "change": "more likely"
                },
                {
                    "type": "openpi_entity",
                    "entity": "lime juice",
                    "attribute": "in container",
                    "change": "less likely"
                },
                {
                    "type": "openpi_entity",
                    "entity": "lime",
                    "attribute": "wet",
                    "change": "more likely"
                },
                {
                    "type": "openpi_entity",
                    "entity": "lime",
                    "attribute": "dry",
                    "change": "less likely"
                },
                {
                    "type": "openpi_entity",
                    "entity": "blender",
                    "attribute": "fuller",
                    "change": "more likely"
                },
                {
                    "type": "openpi_entity",
                    "entity": "blender",
                    "attribute": "emptier",
                    "change": "less likely"
                },
                {
                    "type": "openpi_entity",
                    "entity": "sugar",
                    "attribute": "liquid",
                    "change": "more likely"
                },
                {
                    "type": "openpi_entity",
                    "entity": "sugar",
                    "attribute": "solid",
                    "change": "less likely"
                },
                {
                    "type": "openpi_entity",
                    "entity": "water",
                    "attribute": "hot",
                    "change": "more likely"
                },
                {
                    "type": "openpi_entity",
                    "entity": "water",
                    "attribute": "cold",
                    "change": "less likely"
                },
                {
                    "type": "openpi_entity",
                    "entity": "lime juice",
                    "attribute": "inside blender",
                    "change": "more likely"
                },
                {
                    "type": "openpi_entity",
                    "entity": "lime juice",
                    "attribute": "outside of blender",
                    "change": "less likely"
                },
                {
                    "type": "openpi_entity",
                    "entity": "lime juice",
                    "attribute": "in blender",
                    "change": "more likely"
                },
                {
                    "type": "openpi_entity",
                    "entity": "lime juice",
                    "attribute": "in jar",
                    "change": "less likely"
                },
                {
                    "type": "openpi_entity",
                    "entity": "sugar",
                    "attribute": "wet",
                    "change": "more likely"
                },
                {
                    "type": "openpi_entity",
                    "entity": "sugar",
                    "attribute": "dry",
                    "change": "less likely"
                },
                {
                    "type": "openpi_entity",
                    "entity": "juice",
                    "attribute": "inside blender",
                    "change": "more likely"
                },
                {
                    "type": "openpi_entity",
                    "entity": "juice",
                    "attribute": "outside of blender",
                    "change": "less likely"
                },
                {
                    "type": "openpi_entity",
                    "entity": "sugar",
                    "attribute": "inside of blender",
                    "change": "more likely"
                },
                {
                    "type": "openpi_entity",
                    "entity": "sugar",
                    "attribute": "outside of blender",
                    "change": "less likely"
                }
            ],
            [
                {
                    "type": "step",
                    "step": "Blend until the mixture is smooth.\u00c2\u00a0"
                },
                {
                    "type": "entity",
                    "entity": "the strawberries",
                    "attribute": "liquid",
                    "change": "more likely"
                },
                {
                    "type": "multihop",
                    "event": "I drink the strawberries.",
                    "change": "more likely"
                },
                {
                    "type": "openpi_entity",
                    "entity": "mixture",
                    "attribute": "smooth",
                    "change": "more likely"
                },
                {
                    "type": "openpi_entity",
                    "entity": "mixture",
                    "attribute": "bumpy",
                    "change": "less likely"
                },
                {
                    "type": "openpi_entity",
                    "entity": "blender",
                    "attribute": "on",
                    "change": "more likely"
                },
                {
                    "type": "openpi_entity",
                    "entity": "blender",
                    "attribute": "off",
                    "change": "less likely"
                },
                {
                    "type": "openpi_entity",
                    "entity": "mixture",
                    "attribute": "silvery gray",
                    "change": "more likely"
                },
                {
                    "type": "openpi_entity",
                    "entity": "mixture",
                    "attribute": "colorless",
                    "change": "less likely"
                },
                {
                    "type": "openpi_entity",
                    "entity": "blender",
                    "attribute": "dirty",
                    "change": "more likely"
                },
                {
                    "type": "openpi_entity",
                    "entity": "blender",
                    "attribute": "clean",
                    "change": "less likely"
                },
                {
                    "type": "openpi_entity",
                    "entity": "mix",
                    "attribute": "blended",
                    "change": "more likely"
                },
                {
                    "type": "openpi_entity",
                    "entity": "mix",
                    "attribute": "still",
                    "change": "less likely"
                },
                {
                    "type": "openpi_entity",
                    "entity": "mixture",
                    "attribute": "small",
                    "change": "more likely"
                },
                {
                    "type": "openpi_entity",
                    "entity": "mixture",
                    "attribute": "large",
                    "change": "less likely"
                }
            ],
            [
                {
                    "type": "step",
                    "step": "Pour the mixture into a glass and garnish it with a strawberry."
                },
                {
                    "type": "openpi_entity",
                    "entity": "mixture",
                    "attribute": "in glass",
                    "change": "more likely"
                },
                {
                    "type": "openpi_entity",
                    "entity": "mixture",
                    "attribute": "in blender",
                    "change": "less likely"
                },
                {
                    "type": "openpi_entity",
                    "entity": "glass",
                    "attribute": "full",
                    "change": "more likely"
                },
                {
                    "type": "openpi_entity",
                    "entity": "glass",
                    "attribute": "empty",
                    "change": "less likely"
                },
                {
                    "type": "openpi_entity",
                    "entity": "glass",
                    "attribute": "cold",
                    "change": "more likely"
                },
                {
                    "type": "openpi_entity",
                    "entity": "glass",
                    "attribute": "room temperature",
                    "change": "less likely"
                },
                {
                    "type": "openpi_entity",
                    "entity": "blender",
                    "attribute": "lighter",
                    "change": "more likely"
                },
                {
                    "type": "openpi_entity",
                    "entity": "blender",
                    "attribute": "heavier",
                    "change": "less likely"
                },
                {
                    "type": "openpi_entity",
                    "entity": "glass",
                    "attribute": "wet",
                    "change": "more likely"
                },
                {
                    "type": "openpi_entity",
                    "entity": "glass",
                    "attribute": "dry",
                    "change": "less likely"
                },
                {
                    "type": "openpi_entity",
                    "entity": "glass",
                    "attribute": "full",
                    "change": "more likely"
                },
                {
                    "type": "openpi_entity",
                    "entity": "glass",
                    "attribute": "empty",
                    "change": "less likely"
                },
                {
                    "type": "openpi_entity",
                    "entity": "glass",
                    "attribute": "dirty",
                    "change": "more likely"
                },
                {
                    "type": "openpi_entity",
                    "entity": "glass",
                    "attribute": "clean",
                    "change": "less likely"
                },
                {
                    "type": "openpi_entity",
                    "entity": "glass",
                    "attribute": "wet",
                    "change": "more likely"
                },
                {
                    "type": "openpi_entity",
                    "entity": "glass",
                    "attribute": "dry",
                    "change": "less likely"
                }
            ],
            [
                {
                    "type": "step",
                    "step": "Serve."
                },
                {
                    "type": "openpi_entity",
                    "entity": "mixture",
                    "attribute": "in glass",
                    "change": "more likely"
                },
                {
                    "type": "openpi_entity",
                    "entity": "mixture",
                    "attribute": "in blender",
                    "change": "less likely"
                },
                {
                    "type": "openpi_entity",
                    "entity": "glass",
                    "attribute": "on the table",
                    "change": "more likely"
                },
                {
                    "type": "openpi_entity",
                    "entity": "glass",
                    "attribute": "in the cupboard",
                    "change": "less likely"
                },
                {
                    "type": "openpi_entity",
                    "entity": "blender",
                    "attribute": "empty",
                    "change": "more likely"
                },
                {
                    "type": "openpi_entity",
                    "entity": "blender",
                    "attribute": "full",
                    "change": "less likely"
                },
                {
                    "type": "openpi_entity",
                    "entity": "glass",
                    "attribute": "full",
                    "change": "more likely"
                },
                {
                    "type": "openpi_entity",
                    "entity": "glass",
                    "attribute": "empty",
                    "change": "less likely"
                },
                {
                    "type": "openpi_entity",
                    "entity": "glass",
                    "attribute": "on table",
                    "change": "more likely"
                },
                {
                    "type": "openpi_entity",
                    "entity": "glass",
                    "attribute": "in cabinet",
                    "change": "less likely"
                },
                {
                    "type": "openpi_entity",
                    "entity": "glass",
                    "attribute": "decorated",
                    "change": "more likely"
                },
                {
                    "type": "openpi_entity",
                    "entity": "glass",
                    "attribute": "undecorated",
                    "change": "less likely"
                }
            ]
        ]
    },
    "12": {
        "goal": "Making Matcha Green Tea the Traditional Way",
        "annotator": "kuan wei",
        "steps": [
            [
                {
                    "step": "Start."
                }
            ],
            [
                {
                    "type": "step",
                    "step": "Boil 3/4 cup (180 ml) of water and pour it into your matcha bowl.\u00c2\u00a0"
                },
                {
                    "type": "openpi_entity",
                    "entity": "water faucet",
                    "attribute": "on",
                    "change": "more likely"
                },
                {
                    "type": "openpi_entity",
                    "entity": "water faucet",
                    "attribute": "off",
                    "change": "less likely"
                },
                {
                    "type": "openpi_entity",
                    "entity": "spoon",
                    "attribute": "wet",
                    "change": "more likely"
                },
                {
                    "type": "openpi_entity",
                    "entity": "spoon",
                    "attribute": "dry",
                    "change": "less likely"
                },
                {
                    "type": "openpi_entity",
                    "entity": "the bowl",
                    "attribute": "now containing the mixture",
                    "change": "more likely"
                },
                {
                    "type": "openpi_entity",
                    "entity": "the bowl",
                    "attribute": "empty",
                    "change": "less likely"
                },
                {
                    "type": "openpi_entity",
                    "entity": "bowl",
                    "attribute": "wet",
                    "change": "more likely"
                },
                {
                    "type": "openpi_entity",
                    "entity": "bowl",
                    "attribute": "dry",
                    "change": "less likely"
                },
                {
                    "type": "openpi_entity",
                    "entity": "water",
                    "attribute": "hot",
                    "change": "more likely"
                },
                {
                    "type": "openpi_entity",
                    "entity": "water",
                    "attribute": "cold",
                    "change": "less likely"
                },
                {
                    "type": "openpi_entity",
                    "entity": "water",
                    "attribute": "hot",
                    "change": "more likely"
                },
                {
                    "type": "openpi_entity",
                    "entity": "water",
                    "attribute": "room temperature",
                    "change": "less likely"
                },
                {
                    "type": "openpi_entity",
                    "entity": "the bowl",
                    "attribute": "heavier",
                    "change": "more likely"
                },
                {
                    "type": "openpi_entity",
                    "entity": "the bowl",
                    "attribute": "lighter",
                    "change": "less likely"
                },
                {
                    "type": "openpi_entity",
                    "entity": "the bowl",
                    "attribute": "wet",
                    "change": "more likely"
                },
                {
                    "type": "openpi_entity",
                    "entity": "the bowl",
                    "attribute": "dry",
                    "change": "less likely"
                },
                {
                    "type": "openpi_entity",
                    "entity": "mixture",
                    "attribute": "in the bowl",
                    "change": "more likely"
                },
                {
                    "type": "openpi_entity",
                    "entity": "mixture",
                    "attribute": "in the pot",
                    "change": "less likely"
                },
                {
                    "type": "openpi_entity",
                    "entity": "matcha",
                    "attribute": "wet",
                    "change": "more likely"
                },
                {
                    "type": "openpi_entity",
                    "entity": "matcha",
                    "attribute": "dry",
                    "change": "less likely"
                },
                {
                    "type": "openpi_entity",
                    "entity": "matcha",
                    "attribute": "hot",
                    "change": "more likely"
                },
                {
                    "type": "openpi_entity",
                    "entity": "matcha",
                    "attribute": "room temperature",
                    "change": "less likely"
                },
                {
                    "type": "openpi_entity",
                    "entity": "matcha",
                    "attribute": "hot",
                    "change": "more likely"
                },
                {
                    "type": "openpi_entity",
                    "entity": "matcha",
                    "attribute": "cold",
                    "change": "less likely"
                },
                {
                    "type": "openpi_entity",
                    "entity": "matcha",
                    "attribute": "cooked",
                    "change": "more likely"
                },
                {
                    "type": "openpi_entity",
                    "entity": "matcha",
                    "attribute": "raw",
                    "change": "less likely"
                },
                {
                    "type": "openpi_entity",
                    "entity": "water",
                    "attribute": "in the bowl",
                    "change": "more likely"
                },
                {
                    "type": "openpi_entity",
                    "entity": "water",
                    "attribute": "in the bucket",
                    "change": "less likely"
                }
            ],
            [
                {
                    "type": "step",
                    "step": "Whisk the hot water with a chasen.\u00c2\u00a0"
                },
                {
                    "type": "openpi_entity",
                    "entity": "the bowl",
                    "attribute": "wetter",
                    "change": "more likely"
                },
                {
                    "type": "openpi_entity",
                    "entity": "the bowl",
                    "attribute": "dryer",
                    "change": "less likely"
                },
                {
                    "type": "openpi_entity",
                    "entity": "water",
                    "attribute": "hot",
                    "change": "more likely"
                },
                {
                    "type": "openpi_entity",
                    "entity": "water",
                    "attribute": "cold",
                    "change": "less likely"
                },
                {
                    "type": "openpi_entity",
                    "entity": "water",
                    "attribute": "hot",
                    "change": "more likely"
                },
                {
                    "type": "openpi_entity",
                    "entity": "water",
                    "attribute": "room temperature",
                    "change": "less likely"
                },
                {
                    "type": "openpi_entity",
                    "entity": "water",
                    "attribute": "in bowl",
                    "change": "more likely"
                },
                {
                    "type": "openpi_entity",
                    "entity": "water",
                    "attribute": "in jug",
                    "change": "less likely"
                },
                {
                    "type": "openpi_entity",
                    "entity": "the bowl",
                    "attribute": "wetter",
                    "change": "more likely"
                },
                {
                    "type": "openpi_entity",
                    "entity": "the bowl",
                    "attribute": "drier",
                    "change": "less likely"
                },
                {
                    "type": "openpi_entity",
                    "entity": "water",
                    "attribute": "in bowl",
                    "change": "more likely"
                },
                {
                    "type": "openpi_entity",
                    "entity": "water",
                    "attribute": "in jug",
                    "change": "less likely"
                },
                {
                    "type": "openpi_entity",
                    "entity": "chasen",
                    "attribute": "wet",
                    "change": "more likely"
                },
                {
                    "type": "openpi_entity",
                    "entity": "chasen",
                    "attribute": "dry",
                    "change": "less likely"
                },
                {
                    "type": "openpi_entity",
                    "entity": "water",
                    "attribute": "in bowl",
                    "change": "more likely"
                },
                {
                    "type": "openpi_entity",
                    "entity": "water",
                    "attribute": "in pot",
                    "change": "less likely"
                },
                {
                    "type": "openpi_entity",
                    "entity": "bowl",
                    "attribute": "containing  hot water",
                    "change": "more likely"
                },
                {
                    "type": "openpi_entity",
                    "entity": "bowl",
                    "attribute": "clean",
                    "change": "less likely"
                }
            ],
            [
                {
                    "type": "step",
                    "step": "Discard the hot water from the bowl."
                },
                {
                    "type": "openpi_entity",
                    "entity": "the bowl",
                    "attribute": "cooler",
                    "change": "more likely"
                },
                {
                    "type": "openpi_entity",
                    "entity": "the bowl",
                    "attribute": "warmer",
                    "change": "less likely"
                },
                {
                    "type": "openpi_entity",
                    "entity": "the bowl",
                    "attribute": "wetter",
                    "change": "more likely"
                },
                {
                    "type": "openpi_entity",
                    "entity": "the bowl",
                    "attribute": "drier",
                    "change": "less likely"
                },
                {
                    "type": "openpi_entity",
                    "entity": "bucket",
                    "attribute": "less full",
                    "change": "more likely"
                },
                {
                    "type": "openpi_entity",
                    "entity": "bucket",
                    "attribute": "more full",
                    "change": "less likely"
                },
                {
                    "type": "openpi_entity",
                    "entity": "hot water",
                    "attribute": "in the bowl",
                    "change": "more likely"
                },
                {
                    "type": "openpi_entity",
                    "entity": "hot water",
                    "attribute": "in the bowl",
                    "change": "less likely"
                },
                {
                    "type": "openpi_entity",
                    "entity": "the bowl",
                    "attribute": "lighter",
                    "change": "more likely"
                },
                {
                    "type": "openpi_entity",
                    "entity": "the bowl",
                    "attribute": "heavier",
                    "change": "less likely"
                },
                {
                    "type": "openpi_entity",
                    "entity": "the bowl",
                    "attribute": "heavier",
                    "change": "more likely"
                },
                {
                    "type": "openpi_entity",
                    "entity": "the bowl",
                    "attribute": "lighter",
                    "change": "less likely"
                },
                {
                    "type": "openpi_entity",
                    "entity": "bowl",
                    "attribute": "less full",
                    "change": "more likely"
                },
                {
                    "type": "openpi_entity",
                    "entity": "bowl",
                    "attribute": "more full",
                    "change": "less likely"
                },
                {
                    "type": "openpi_entity",
                    "entity": "water",
                    "attribute": "in the bowl",
                    "change": "more likely"
                },
                {
                    "type": "openpi_entity",
                    "entity": "water",
                    "attribute": "in the bowl",
                    "change": "less likely"
                },
                {
                    "type": "openpi_entity",
                    "entity": "water",
                    "attribute": "in drain",
                    "change": "more likely"
                },
                {
                    "type": "openpi_entity",
                    "entity": "water",
                    "attribute": "in bowl",
                    "change": "less likely"
                },
                {
                    "type": "openpi_entity",
                    "entity": "water",
                    "attribute": "cooling",
                    "change": "more likely"
                },
                {
                    "type": "openpi_entity",
                    "entity": "water",
                    "attribute": "boiling",
                    "change": "less likely"
                },
                {
                    "type": "openpi_entity",
                    "entity": "water",
                    "attribute": "cooling",
                    "change": "more likely"
                },
                {
                    "type": "openpi_entity",
                    "entity": "water",
                    "attribute": "hot",
                    "change": "less likely"
                }
            ],
            [
                {
                    "type": "step",
                    "step": "Scoop 2 tsp (1.5 heaping teaspoons or 10 g) of matcha into a fine mesh strainer."
                },
                {
                    "type": "openpi_entity",
                    "entity": "bowl",
                    "attribute": "lighter",
                    "change": "more likely"
                },
                {
                    "type": "openpi_entity",
                    "entity": "bowl",
                    "attribute": "heavier",
                    "change": "less likely"
                },
                {
                    "type": "openpi_entity",
                    "entity": "matcha",
                    "attribute": "in saucet",
                    "change": "more likely"
                },
                {
                    "type": "openpi_entity",
                    "entity": "matcha",
                    "attribute": "in bowl",
                    "change": "less likely"
                },
                {
                    "type": "openpi_entity",
                    "entity": "matcha",
                    "attribute": "in the sink",
                    "change": "more likely"
                },
                {
                    "type": "openpi_entity",
                    "entity": "matcha",
                    "attribute": "in the bowl",
                    "change": "less likely"
                },
                {
                    "type": "openpi_entity",
                    "entity": "strainer",
                    "attribute": "dirty",
                    "change": "more likely"
                },
                {
                    "type": "openpi_entity",
                    "entity": "strainer",
                    "attribute": "clean",
                    "change": "less likely"
                },
                {
                    "type": "openpi_entity",
                    "entity": "bowl",
                    "attribute": "empty",
                    "change": "more likely"
                },
                {
                    "type": "openpi_entity",
                    "entity": "bowl",
                    "attribute": "full",
                    "change": "less likely"
                },
                {
                    "type": "openpi_entity",
                    "entity": "bowl",
                    "attribute": "light",
                    "change": "more likely"
                },
                {
                    "type": "openpi_entity",
                    "entity": "bowl",
                    "attribute": "heavy",
                    "change": "less likely"
                },
                {
                    "type": "openpi_entity",
                    "entity": "bowl",
                    "attribute": "less full",
                    "change": "more likely"
                },
                {
                    "type": "openpi_entity",
                    "entity": "bowl",
                    "attribute": "more full",
                    "change": "less likely"
                },
                {
                    "type": "openpi_entity",
                    "entity": "cleaning mixture",
                    "attribute": "wet",
                    "change": "more likely"
                },
                {
                    "type": "openpi_entity",
                    "entity": "cleaning mixture",
                    "attribute": "dry",
                    "change": "less likely"
                },
                {
                    "type": "openpi_entity",
                    "entity": "matcha",
                    "attribute": "dry",
                    "change": "more likely"
                },
                {
                    "type": "openpi_entity",
                    "entity": "matcha",
                    "attribute": "wet",
                    "change": "less likely"
                },
                {
                    "type": "openpi_entity",
                    "entity": "matcha",
                    "attribute": "in the strainer",
                    "change": "more likely"
                },
                {
                    "type": "openpi_entity",
                    "entity": "matcha",
                    "attribute": "in the bowl",
                    "change": "less likely"
                }
            ],
            [
                {
                    "type": "step",
                    "step": "Sift the matcha into your empty, dry bowl."
                },
                {
                    "type": "openpi_entity",
                    "entity": "the matcha",
                    "attribute": "colder",
                    "change": "more likely"
                },
                {
                    "type": "openpi_entity",
                    "entity": "the matcha",
                    "attribute": "warm",
                    "change": "less likely"
                },
                {
                    "type": "openpi_entity",
                    "entity": "matcha",
                    "attribute": "in the bowl",
                    "change": "more likely"
                },
                {
                    "type": "openpi_entity",
                    "entity": "matcha",
                    "attribute": "in the bowl",
                    "change": "less likely"
                },
                {
                    "type": "openpi_entity",
                    "entity": "the bowl",
                    "attribute": "heavier",
                    "change": "more likely"
                },
                {
                    "type": "openpi_entity",
                    "entity": "the bowl",
                    "attribute": "lighter",
                    "change": "less likely"
                },
                {
                    "type": "openpi_entity",
                    "entity": "strainer",
                    "attribute": "wet",
                    "change": "more likely"
                },
                {
                    "type": "openpi_entity",
                    "entity": "strainer",
                    "attribute": "dry",
                    "change": "less likely"
                },
                {
                    "type": "openpi_entity",
                    "entity": "matcha",
                    "attribute": "in strainer",
                    "change": "more likely"
                },
                {
                    "type": "openpi_entity",
                    "entity": "matcha",
                    "attribute": "in bowl",
                    "change": "less likely"
                },
                {
                    "type": "openpi_entity",
                    "entity": "bowl",
                    "attribute": "full",
                    "change": "more likely"
                },
                {
                    "type": "openpi_entity",
                    "entity": "bowl",
                    "attribute": "empty",
                    "change": "less likely"
                },
                {
                    "type": "openpi_entity",
                    "entity": "the bowl",
                    "attribute": "dirty",
                    "change": "more likely"
                },
                {
                    "type": "openpi_entity",
                    "entity": "the bowl",
                    "attribute": "clean",
                    "change": "less likely"
                },
                {
                    "type": "openpi_entity",
                    "entity": "matcha",
                    "attribute": "clean",
                    "change": "more likely"
                },
                {
                    "type": "openpi_entity",
                    "entity": "matcha",
                    "attribute": "dirty",
                    "change": "less likely"
                },
                {
                    "type": "openpi_entity",
                    "entity": "the bowl",
                    "attribute": "dirtier",
                    "change": "more likely"
                },
                {
                    "type": "openpi_entity",
                    "entity": "the bowl",
                    "attribute": "clean",
                    "change": "less likely"
                },
                {
                    "type": "openpi_entity",
                    "entity": "strainer",
                    "attribute": "wet",
                    "change": "more likely"
                },
                {
                    "type": "openpi_entity",
                    "entity": "strainer",
                    "attribute": "dry",
                    "change": "less likely"
                },
                {
                    "type": "openpi_entity",
                    "entity": "bowl",
                    "attribute": "dirty",
                    "change": "more likely"
                },
                {
                    "type": "openpi_entity",
                    "entity": "bowl",
                    "attribute": "clean",
                    "change": "less likely"
                }
            ],
            [
                {
                    "type": "step",
                    "step": "Pour boiling water into a teacup.\u00c2\u00a0"
                },
                {
                    "type": "openpi_entity",
                    "entity": "matcha",
                    "attribute": "dry",
                    "change": "more likely"
                },
                {
                    "type": "openpi_entity",
                    "entity": "matcha",
                    "attribute": "wet",
                    "change": "less likely"
                },
                {
                    "type": "openpi_entity",
                    "entity": "teaspoon",
                    "attribute": "dirty",
                    "change": "more likely"
                },
                {
                    "type": "openpi_entity",
                    "entity": "teaspoon",
                    "attribute": "clean",
                    "change": "less likely"
                },
                {
                    "type": "openpi_entity",
                    "entity": "water",
                    "attribute": "in a cup",
                    "change": "more likely"
                },
                {
                    "type": "openpi_entity",
                    "entity": "water",
                    "attribute": "in a bowl",
                    "change": "less likely"
                },
                {
                    "type": "openpi_entity",
                    "entity": "teacup",
                    "attribute": "heavier",
                    "change": "more likely"
                },
                {
                    "type": "openpi_entity",
                    "entity": "teacup",
                    "attribute": "lighter",
                    "change": "less likely"
                },
                {
                    "type": "openpi_entity",
                    "entity": "tea",
                    "attribute": "cool",
                    "change": "more likely"
                },
                {
                    "type": "openpi_entity",
                    "entity": "tea",
                    "attribute": "hot",
                    "change": "less likely"
                },
                {
                    "type": "openpi_entity",
                    "entity": "matcha",
                    "attribute": "cool",
                    "change": "more likely"
                },
                {
                    "type": "openpi_entity",
                    "entity": "matcha",
                    "attribute": "hot",
                    "change": "less likely"
                },
                {
                    "type": "openpi_entity",
                    "entity": "teacup",
                    "attribute": "full",
                    "change": "more likely"
                },
                {
                    "type": "openpi_entity",
                    "entity": "teacup",
                    "attribute": "empty",
                    "change": "less likely"
                },
                {
                    "type": "openpi_entity",
                    "entity": "teacup",
                    "attribute": "fuller",
                    "change": "more likely"
                },
                {
                    "type": "openpi_entity",
                    "entity": "teacup",
                    "attribute": "emptier",
                    "change": "less likely"
                },
                {
                    "type": "openpi_entity",
                    "entity": "boiling water",
                    "attribute": "in the water",
                    "change": "more likely"
                },
                {
                    "type": "openpi_entity",
                    "entity": "boiling water",
                    "attribute": "in the bowl",
                    "change": "less likely"
                },
                {
                    "type": "openpi_entity",
                    "entity": "water",
                    "attribute": "in bowl",
                    "change": "more likely"
                },
                {
                    "type": "openpi_entity",
                    "entity": "water",
                    "attribute": "in bucket",
                    "change": "less likely"
                },
                {
                    "type": "openpi_entity",
                    "entity": "matcha",
                    "attribute": "dry",
                    "change": "more likely"
                },
                {
                    "type": "openpi_entity",
                    "entity": "matcha",
                    "attribute": "wet",
                    "change": "less likely"
                },
                {
                    "type": "openpi_entity",
                    "entity": "mixture",
                    "attribute": "dry",
                    "change": "more likely"
                },
                {
                    "type": "openpi_entity",
                    "entity": "mixture",
                    "attribute": "wet",
                    "change": "less likely"
                },
                {
                    "type": "openpi_entity",
                    "entity": "water",
                    "attribute": "in a cup",
                    "change": "more likely"
                },
                {
                    "type": "openpi_entity",
                    "entity": "water",
                    "attribute": "in the bowl",
                    "change": "less likely"
                }
            ],
            [
                {
                    "type": "step",
                    "step": "Add a small amount of hot water into the matcha bowl and whisk it.\u00c2\u00a0"
                },
                {
                    "type": "entity",
                    "entity": "the matcha",
                    "attribute": "in the form of powder",
                    "change": "less likely"
                },
                {
                    "type": "multihop",
                    "event": "I drink the matcha.",
                    "change": "more likely"
                },
                {
                    "type": "openpi_entity",
                    "entity": "matcha",
                    "attribute": "cooler",
                    "change": "more likely"
                },
                {
                    "type": "openpi_entity",
                    "entity": "matcha",
                    "attribute": "hot",
                    "change": "less likely"
                },
                {
                    "type": "openpi_entity",
                    "entity": "water",
                    "attribute": "in the bowl",
                    "change": "more likely"
                },
                {
                    "type": "openpi_entity",
                    "entity": "water",
                    "attribute": "in the bowl",
                    "change": "less likely"
                },
                {
                    "type": "openpi_entity",
                    "entity": "pot",
                    "attribute": "emptier",
                    "change": "more likely"
                },
                {
                    "type": "openpi_entity",
                    "entity": "pot",
                    "attribute": "fuller",
                    "change": "less likely"
                },
                {
                    "type": "openpi_entity",
                    "entity": "water",
                    "attribute": "colder",
                    "change": "more likely"
                },
                {
                    "type": "openpi_entity",
                    "entity": "water",
                    "attribute": "boiling",
                    "change": "less likely"
                },
                {
                    "type": "openpi_entity",
                    "entity": "hot water",
                    "attribute": "in a bowl",
                    "change": "more likely"
                },
                {
                    "type": "openpi_entity",
                    "entity": "hot water",
                    "attribute": "in a pot",
                    "change": "less likely"
                },
                {
                    "type": "openpi_entity",
                    "entity": "matcha",
                    "attribute": "wet",
                    "change": "more likely"
                },
                {
                    "type": "openpi_entity",
                    "entity": "matcha",
                    "attribute": "dry",
                    "change": "less likely"
                },
                {
                    "type": "openpi_entity",
                    "entity": "water",
                    "attribute": "cooler",
                    "change": "more likely"
                },
                {
                    "type": "openpi_entity",
                    "entity": "water",
                    "attribute": "boiling",
                    "change": "less likely"
                },
                {
                    "type": "openpi_entity",
                    "entity": "mixture",
                    "attribute": "cooler",
                    "change": "more likely"
                },
                {
                    "type": "openpi_entity",
                    "entity": "mixture",
                    "attribute": "hotter",
                    "change": "less likely"
                },
                {
                    "type": "openpi_entity",
                    "entity": "water",
                    "attribute": "in the bowl",
                    "change": "more likely"
                },
                {
                    "type": "openpi_entity",
                    "entity": "water",
                    "attribute": "in a measuring cup",
                    "change": "less likely"
                },
                {
                    "type": "openpi_entity",
                    "entity": "water",
                    "attribute": "cooling",
                    "change": "more likely"
                },
                {
                    "type": "openpi_entity",
                    "entity": "water",
                    "attribute": "boiling",
                    "change": "less likely"
                },
                {
                    "type": "openpi_entity",
                    "entity": "bowl",
                    "attribute": "heavier",
                    "change": "more likely"
                },
                {
                    "type": "openpi_entity",
                    "entity": "bowl",
                    "attribute": "lighter",
                    "change": "less likely"
                }
            ],
            [
                {
                    "type": "step",
                    "step": "Add the teacup water to the bowl until it's 1/3 full and continue whisking.\u00c2\u00a0"
                },
                {
                    "type": "openpi_entity",
                    "entity": "hot water",
                    "attribute": "hotter",
                    "change": "more likely"
                },
                {
                    "type": "openpi_entity",
                    "entity": "hot water",
                    "attribute": "cooler",
                    "change": "less likely"
                },
                {
                    "type": "openpi_entity",
                    "entity": "water",
                    "attribute": "in bowl",
                    "change": "more likely"
                },
                {
                    "type": "openpi_entity",
                    "entity": "water",
                    "attribute": "away from bowl",
                    "change": "less likely"
                },
                {
                    "type": "openpi_entity",
                    "entity": "teacup",
                    "attribute": "in bowl",
                    "change": "more likely"
                },
                {
                    "type": "openpi_entity",
                    "entity": "teacup",
                    "attribute": "away from bowl",
                    "change": "less likely"
                },
                {
                    "type": "openpi_entity",
                    "entity": "teacup",
                    "attribute": "heavier",
                    "change": "more likely"
                },
                {
                    "type": "openpi_entity",
                    "entity": "teacup",
                    "attribute": "lighter",
                    "change": "less likely"
                },
                {
                    "type": "openpi_entity",
                    "entity": "water",
                    "attribute": "in the bowl",
                    "change": "more likely"
                },
                {
                    "type": "openpi_entity",
                    "entity": "water",
                    "attribute": "in the tap",
                    "change": "less likely"
                },
                {
                    "type": "openpi_entity",
                    "entity": "water",
                    "attribute": "colder",
                    "change": "more likely"
                },
                {
                    "type": "openpi_entity",
                    "entity": "water",
                    "attribute": "warm",
                    "change": "less likely"
                },
                {
                    "type": "openpi_entity",
                    "entity": "matcha",
                    "attribute": "cool",
                    "change": "more likely"
                },
                {
                    "type": "openpi_entity",
                    "entity": "matcha",
                    "attribute": "hot",
                    "change": "less likely"
                },
                {
                    "type": "openpi_entity",
                    "entity": "bowl",
                    "attribute": "more full",
                    "change": "more likely"
                },
                {
                    "type": "openpi_entity",
                    "entity": "bowl",
                    "attribute": "somewhat full",
                    "change": "less likely"
                },
                {
                    "type": "openpi_entity",
                    "entity": "teacup",
                    "attribute": "more full",
                    "change": "more likely"
                },
                {
                    "type": "openpi_entity",
                    "entity": "teacup",
                    "attribute": "less full",
                    "change": "less likely"
                }
            ],
            [
                {
                    "type": "step",
                    "step": "Clean your utensils."
                },
                {
                    "type": "openpi_entity",
                    "entity": "the bowl",
                    "attribute": "cooler",
                    "change": "more likely"
                },
                {
                    "type": "openpi_entity",
                    "entity": "the bowl",
                    "attribute": "warmer",
                    "change": "less likely"
                },
                {
                    "type": "openpi_entity",
                    "entity": "the utensil",
                    "attribute": "clean",
                    "change": "more likely"
                },
                {
                    "type": "openpi_entity",
                    "entity": "the utensil",
                    "attribute": "dirty",
                    "change": "less likely"
                },
                {
                    "type": "openpi_entity",
                    "entity": "the bowl",
                    "attribute": "heavier",
                    "change": "more likely"
                },
                {
                    "type": "openpi_entity",
                    "entity": "the bowl",
                    "attribute": "lighter",
                    "change": "less likely"
                },
                {
                    "type": "openpi_entity",
                    "entity": "utensil",
                    "attribute": "clean",
                    "change": "more likely"
                },
                {
                    "type": "openpi_entity",
                    "entity": "utensil",
                    "attribute": "dirty",
                    "change": "less likely"
                },
                {
                    "type": "openpi_entity",
                    "entity": "the matcha",
                    "attribute": "now free of water",
                    "change": "more likely"
                },
                {
                    "type": "openpi_entity",
                    "entity": "the matcha",
                    "attribute": "containing some water",
                    "change": "less likely"
                },
                {
                    "type": "openpi_entity",
                    "entity": "air",
                    "attribute": "filled with matcha",
                    "change": "more likely"
                },
                {
                    "type": "openpi_entity",
                    "entity": "air",
                    "attribute": "clear",
                    "change": "less likely"
                }
            ]
        ]
    },
    "13": {
        "goal": "How to Make a Watermelon Keg",
        "annotator": "kuan wei",
        "steps": [
            [
                {
                    "step": "Start."
                }
            ],
            [
                {
                    "type": "step",
                    "step": "Wash the watermelon.\u00c2\u00a0"
                },
                {
                    "type": "openpi_entity",
                    "entity": "the pot",
                    "attribute": "heavier",
                    "change": "more likely"
                },
                {
                    "type": "openpi_entity",
                    "entity": "the pot",
                    "attribute": "lighter",
                    "change": "less likely"
                },
                {
                    "type": "openpi_entity",
                    "entity": "watermelon",
                    "attribute": "hydrated",
                    "change": "more likely"
                },
                {
                    "type": "openpi_entity",
                    "entity": "watermelon",
                    "attribute": "dehydrated",
                    "change": "less likely"
                },
                {
                    "type": "openpi_entity",
                    "entity": "watermelon",
                    "attribute": "wet",
                    "change": "more likely"
                },
                {
                    "type": "openpi_entity",
                    "entity": "watermelon",
                    "attribute": "dry",
                    "change": "less likely"
                },
                {
                    "type": "openpi_entity",
                    "entity": "watermelon",
                    "attribute": "wet",
                    "change": "more likely"
                },
                {
                    "type": "openpi_entity",
                    "entity": "watermelon",
                    "attribute": "dry",
                    "change": "less likely"
                },
                {
                    "type": "openpi_entity",
                    "entity": "watermelon",
                    "attribute": "in pot",
                    "change": "more likely"
                },
                {
                    "type": "openpi_entity",
                    "entity": "watermelon",
                    "attribute": "on counter",
                    "change": "less likely"
                },
                {
                    "type": "openpi_entity",
                    "entity": "watermelon",
                    "attribute": "soaked",
                    "change": "more likely"
                },
                {
                    "type": "openpi_entity",
                    "entity": "watermelon",
                    "attribute": "whole",
                    "change": "less likely"
                },
                {
                    "type": "openpi_entity",
                    "entity": "watermelon",
                    "attribute": "in watermelon",
                    "change": "more likely"
                },
                {
                    "type": "openpi_entity",
                    "entity": "watermelon",
                    "attribute": "in kitchen",
                    "change": "less likely"
                },
                {
                    "type": "openpi_entity",
                    "entity": "pot",
                    "attribute": "dirty",
                    "change": "more likely"
                },
                {
                    "type": "openpi_entity",
                    "entity": "pot",
                    "attribute": "clean",
                    "change": "less likely"
                },
                {
                    "type": "openpi_entity",
                    "entity": "the pot",
                    "attribute": "full",
                    "change": "more likely"
                },
                {
                    "type": "openpi_entity",
                    "entity": "the pot",
                    "attribute": "empty",
                    "change": "less likely"
                }
            ],
            [
                {
                    "type": "step",
                    "step": "Mark the cut line."
                },
                {
                    "type": "openpi_entity",
                    "entity": "knife",
                    "attribute": "wet",
                    "change": "more likely"
                },
                {
                    "type": "openpi_entity",
                    "entity": "knife",
                    "attribute": "dry",
                    "change": "less likely"
                },
                {
                    "type": "openpi_entity",
                    "entity": "watermelon",
                    "attribute": "marked",
                    "change": "more likely"
                },
                {
                    "type": "openpi_entity",
                    "entity": "watermelon",
                    "attribute": "whole",
                    "change": "less likely"
                },
                {
                    "type": "openpi_entity",
                    "entity": "cutting board",
                    "attribute": "dirty",
                    "change": "more likely"
                },
                {
                    "type": "openpi_entity",
                    "entity": "cutting board",
                    "attribute": "clean",
                    "change": "less likely"
                },
                {
                    "type": "openpi_entity",
                    "entity": "knife",
                    "attribute": "dirty",
                    "change": "more likely"
                },
                {
                    "type": "openpi_entity",
                    "entity": "knife",
                    "attribute": "clean",
                    "change": "less likely"
                },
                {
                    "type": "openpi_entity",
                    "entity": "cutting board",
                    "attribute": "wet",
                    "change": "more likely"
                },
                {
                    "type": "openpi_entity",
                    "entity": "cutting board",
                    "attribute": "dry",
                    "change": "less likely"
                },
                {
                    "type": "openpi_entity",
                    "entity": "watermelon",
                    "attribute": "cut",
                    "change": "more likely"
                },
                {
                    "type": "openpi_entity",
                    "entity": "watermelon",
                    "attribute": "whole",
                    "change": "less likely"
                },
                {
                    "type": "openpi_entity",
                    "entity": "watermelon",
                    "attribute": "cut",
                    "change": "more likely"
                },
                {
                    "type": "openpi_entity",
                    "entity": "watermelon",
                    "attribute": "whole",
                    "change": "less likely"
                },
                {
                    "type": "openpi_entity",
                    "entity": "knife",
                    "attribute": "sawed",
                    "change": "more likely"
                },
                {
                    "type": "openpi_entity",
                    "entity": "knife",
                    "attribute": "unmarked",
                    "change": "less likely"
                },
                {
                    "type": "openpi_entity",
                    "entity": "saw blade",
                    "attribute": "dirty",
                    "change": "more likely"
                },
                {
                    "type": "openpi_entity",
                    "entity": "saw blade",
                    "attribute": "clean",
                    "change": "less likely"
                },
                {
                    "type": "openpi_entity",
                    "entity": "watermelon",
                    "attribute": "marked",
                    "change": "more likely"
                },
                {
                    "type": "openpi_entity",
                    "entity": "watermelon",
                    "attribute": "clear",
                    "change": "less likely"
                }
            ],
            [
                {
                    "type": "step",
                    "step": "Draw decorative features.\u00c2\u00a0"
                },
                {
                    "type": "openpi_entity",
                    "entity": "knife",
                    "attribute": "wet",
                    "change": "more likely"
                },
                {
                    "type": "openpi_entity",
                    "entity": "knife",
                    "attribute": "dry",
                    "change": "less likely"
                },
                {
                    "type": "openpi_entity",
                    "entity": "design",
                    "attribute": "repeated",
                    "change": "more likely"
                },
                {
                    "type": "openpi_entity",
                    "entity": "design",
                    "attribute": "nonexistant",
                    "change": "less likely"
                },
                {
                    "type": "openpi_entity",
                    "entity": "paper",
                    "attribute": "dirty",
                    "change": "more likely"
                },
                {
                    "type": "openpi_entity",
                    "entity": "paper",
                    "attribute": "clean",
                    "change": "less likely"
                },
                {
                    "type": "openpi_entity",
                    "entity": "ink",
                    "attribute": "dry",
                    "change": "more likely"
                },
                {
                    "type": "openpi_entity",
                    "entity": "ink",
                    "attribute": "wet",
                    "change": "less likely"
                },
                {
                    "type": "openpi_entity",
                    "entity": "chalk",
                    "attribute": "wet",
                    "change": "more likely"
                },
                {
                    "type": "openpi_entity",
                    "entity": "chalk",
                    "attribute": "dry",
                    "change": "less likely"
                },
                {
                    "type": "openpi_entity",
                    "entity": "watermelon",
                    "attribute": "cut",
                    "change": "more likely"
                },
                {
                    "type": "openpi_entity",
                    "entity": "watermelon",
                    "attribute": "intact",
                    "change": "less likely"
                },
                {
                    "type": "openpi_entity",
                    "entity": "watermelon",
                    "attribute": "drawn on",
                    "change": "more likely"
                },
                {
                    "type": "openpi_entity",
                    "entity": "watermelon",
                    "attribute": "plain",
                    "change": "less likely"
                },
                {
                    "type": "openpi_entity",
                    "entity": "ink",
                    "attribute": "on watermelon",
                    "change": "more likely"
                },
                {
                    "type": "openpi_entity",
                    "entity": "ink",
                    "attribute": "in pen",
                    "change": "less likely"
                },
                {
                    "type": "openpi_entity",
                    "entity": "watermelon",
                    "attribute": "drawn on",
                    "change": "more likely"
                },
                {
                    "type": "openpi_entity",
                    "entity": "watermelon",
                    "attribute": "plain",
                    "change": "less likely"
                },
                {
                    "type": "openpi_entity",
                    "entity": "paper",
                    "attribute": "wet",
                    "change": "more likely"
                },
                {
                    "type": "openpi_entity",
                    "entity": "paper",
                    "attribute": "dry",
                    "change": "less likely"
                }
            ],
            [
                {
                    "type": "step",
                    "step": "Cut off the top of the watermelon.\u00c2\u00a0"
                },
                {
                    "type": "entity",
                    "entity": "the watermelon",
                    "attribute": "broken",
                    "change": "more likely"
                },
                {
                    "type": "multihop",
                    "event": "I reach the watermelon's inside.",
                    "change": "more likely"
                },
                {
                    "type": "openpi_entity",
                    "entity": "watermelon",
                    "attribute": "covered",
                    "change": "more likely"
                },
                {
                    "type": "openpi_entity",
                    "entity": "watermelon",
                    "attribute": "bare",
                    "change": "less likely"
                },
                {
                    "type": "openpi_entity",
                    "entity": "paint",
                    "attribute": "on watermelon",
                    "change": "more likely"
                },
                {
                    "type": "openpi_entity",
                    "entity": "paint",
                    "attribute": "in container",
                    "change": "less likely"
                },
                {
                    "type": "openpi_entity",
                    "entity": "knife",
                    "attribute": "wet",
                    "change": "more likely"
                },
                {
                    "type": "openpi_entity",
                    "entity": "knife",
                    "attribute": "dry",
                    "change": "less likely"
                },
                {
                    "type": "openpi_entity",
                    "entity": "watermelon",
                    "attribute": "in wall",
                    "change": "more likely"
                },
                {
                    "type": "openpi_entity",
                    "entity": "watermelon",
                    "attribute": "on counter",
                    "change": "less likely"
                },
                {
                    "type": "openpi_entity",
                    "entity": "watermelon",
                    "attribute": "multiple colors",
                    "change": "more likely"
                },
                {
                    "type": "openpi_entity",
                    "entity": "watermelon",
                    "attribute": "one color",
                    "change": "less likely"
                },
                {
                    "type": "openpi_entity",
                    "entity": "pencil",
                    "attribute": "on table",
                    "change": "more likely"
                },
                {
                    "type": "openpi_entity",
                    "entity": "pencil",
                    "attribute": "in drawer",
                    "change": "less likely"
                },
                {
                    "type": "openpi_entity",
                    "entity": "watermelon",
                    "attribute": "cut",
                    "change": "more likely"
                },
                {
                    "type": "openpi_entity",
                    "entity": "watermelon",
                    "attribute": "intact",
                    "change": "less likely"
                },
                {
                    "type": "openpi_entity",
                    "entity": "watermelon",
                    "attribute": "cut",
                    "change": "more likely"
                },
                {
                    "type": "openpi_entity",
                    "entity": "watermelon",
                    "attribute": "whole",
                    "change": "less likely"
                },
                {
                    "type": "openpi_entity",
                    "entity": "watermelon",
                    "attribute": "silver",
                    "change": "more likely"
                },
                {
                    "type": "openpi_entity",
                    "entity": "watermelon",
                    "attribute": "beige",
                    "change": "less likely"
                },
                {
                    "type": "openpi_entity",
                    "entity": "paintbrush",
                    "attribute": "wet",
                    "change": "more likely"
                },
                {
                    "type": "openpi_entity",
                    "entity": "paintbrush",
                    "attribute": "dry",
                    "change": "less likely"
                },
                {
                    "type": "openpi_entity",
                    "entity": "watermelon",
                    "attribute": "drawn with a line",
                    "change": "more likely"
                },
                {
                    "type": "openpi_entity",
                    "entity": "watermelon",
                    "attribute": "covered in paint",
                    "change": "less likely"
                }
            ],
            [
                {
                    "type": "step",
                    "step": "Gently remove the top.\u00c2\u00a0"
                },
                {
                    "type": "openpi_entity",
                    "entity": "knife",
                    "attribute": "wet",
                    "change": "more likely"
                },
                {
                    "type": "openpi_entity",
                    "entity": "knife",
                    "attribute": "dry",
                    "change": "less likely"
                },
                {
                    "type": "openpi_entity",
                    "entity": "knife",
                    "attribute": "covered in glue",
                    "change": "more likely"
                },
                {
                    "type": "openpi_entity",
                    "entity": "knife",
                    "attribute": "smooth",
                    "change": "less likely"
                },
                {
                    "type": "openpi_entity",
                    "entity": "watermelon",
                    "attribute": "cut",
                    "change": "more likely"
                },
                {
                    "type": "openpi_entity",
                    "entity": "watermelon",
                    "attribute": "intact",
                    "change": "less likely"
                },
                {
                    "type": "openpi_entity",
                    "entity": "watermelon",
                    "attribute": "without decoration",
                    "change": "more likely"
                },
                {
                    "type": "openpi_entity",
                    "entity": "watermelon",
                    "attribute": "whole",
                    "change": "less likely"
                },
                {
                    "type": "openpi_entity",
                    "entity": "watermelon",
                    "attribute": "cut",
                    "change": "more likely"
                },
                {
                    "type": "openpi_entity",
                    "entity": "watermelon",
                    "attribute": "whole",
                    "change": "less likely"
                },
                {
                    "type": "openpi_entity",
                    "entity": "watermelon",
                    "attribute": "cut",
                    "change": "more likely"
                },
                {
                    "type": "openpi_entity",
                    "entity": "watermelon",
                    "attribute": "intact",
                    "change": "less likely"
                },
                {
                    "type": "openpi_entity",
                    "entity": "watermelon",
                    "attribute": "below",
                    "change": "more likely"
                },
                {
                    "type": "openpi_entity",
                    "entity": "watermelon",
                    "attribute": "whole",
                    "change": "less likely"
                },
                {
                    "type": "openpi_entity",
                    "entity": "watermelon",
                    "attribute": "lighter",
                    "change": "more likely"
                },
                {
                    "type": "openpi_entity",
                    "entity": "watermelon",
                    "attribute": "heavier",
                    "change": "less likely"
                }
            ],
            [
                {
                    "type": "step",
                    "step": "Scoop out the watermelon flesh.\u00c2\u00a0"
                },
                {
                    "type": "openpi_entity",
                    "entity": "knife",
                    "attribute": "wet",
                    "change": "more likely"
                },
                {
                    "type": "openpi_entity",
                    "entity": "knife",
                    "attribute": "dry",
                    "change": "less likely"
                },
                {
                    "type": "openpi_entity",
                    "entity": "watermelon",
                    "attribute": "off plant",
                    "change": "more likely"
                },
                {
                    "type": "openpi_entity",
                    "entity": "watermelon",
                    "attribute": "on plant",
                    "change": "less likely"
                },
                {
                    "type": "openpi_entity",
                    "entity": "knife",
                    "attribute": "in hand",
                    "change": "more likely"
                },
                {
                    "type": "openpi_entity",
                    "entity": "knife",
                    "attribute": "on counter",
                    "change": "less likely"
                },
                {
                    "type": "openpi_entity",
                    "entity": "spoon",
                    "attribute": "empty",
                    "change": "more likely"
                },
                {
                    "type": "openpi_entity",
                    "entity": "spoon",
                    "attribute": "full",
                    "change": "less likely"
                },
                {
                    "type": "openpi_entity",
                    "entity": "watermelon",
                    "attribute": "cut into pieces",
                    "change": "more likely"
                },
                {
                    "type": "openpi_entity",
                    "entity": "watermelon",
                    "attribute": "whole",
                    "change": "less likely"
                },
                {
                    "type": "openpi_entity",
                    "entity": "watermelon",
                    "attribute": "cut up",
                    "change": "more likely"
                },
                {
                    "type": "openpi_entity",
                    "entity": "watermelon",
                    "attribute": "whole",
                    "change": "less likely"
                },
                {
                    "type": "openpi_entity",
                    "entity": "cutting board",
                    "attribute": "wet",
                    "change": "more likely"
                },
                {
                    "type": "openpi_entity",
                    "entity": "cutting board",
                    "attribute": "dry",
                    "change": "less likely"
                },
                {
                    "type": "openpi_entity",
                    "entity": "watermelon",
                    "attribute": "in pieces",
                    "change": "more likely"
                },
                {
                    "type": "openpi_entity",
                    "entity": "watermelon",
                    "attribute": "whole",
                    "change": "less likely"
                }
            ],
            [
                {
                    "type": "step",
                    "step": "Save the goodies.\u00c2\u00a0"
                },
                {
                    "type": "openpi_entity",
                    "entity": "bowl",
                    "attribute": "lighter",
                    "change": "more likely"
                },
                {
                    "type": "openpi_entity",
                    "entity": "bowl",
                    "attribute": "heavier",
                    "change": "less likely"
                },
                {
                    "type": "openpi_entity",
                    "entity": "watermelon",
                    "attribute": "sliced",
                    "change": "more likely"
                },
                {
                    "type": "openpi_entity",
                    "entity": "watermelon",
                    "attribute": "whole",
                    "change": "less likely"
                }
            ],
            [
                {
                    "type": "step",
                    "step": "Clean out the inside of the watermelon using a wet paper towel.\u00c2\u00a0"
                },
                {
                    "type": "openpi_entity",
                    "entity": "paper towel",
                    "attribute": "wet",
                    "change": "more likely"
                },
                {
                    "type": "openpi_entity",
                    "entity": "paper towel",
                    "attribute": "dry",
                    "change": "less likely"
                },
                {
                    "type": "openpi_entity",
                    "entity": "watermelon",
                    "attribute": "clean",
                    "change": "more likely"
                },
                {
                    "type": "openpi_entity",
                    "entity": "watermelon",
                    "attribute": "covered in flesh",
                    "change": "less likely"
                },
                {
                    "type": "openpi_entity",
                    "entity": "paper towel",
                    "attribute": "wet",
                    "change": "more likely"
                },
                {
                    "type": "openpi_entity",
                    "entity": "paper towel",
                    "attribute": "dry",
                    "change": "less likely"
                },
                {
                    "type": "openpi_entity",
                    "entity": "paper towel",
                    "attribute": "dirty",
                    "change": "more likely"
                },
                {
                    "type": "openpi_entity",
                    "entity": "paper towel",
                    "attribute": "clean",
                    "change": "less likely"
                },
                {
                    "type": "openpi_entity",
                    "entity": "towel",
                    "attribute": "covered in juice",
                    "change": "more likely"
                },
                {
                    "type": "openpi_entity",
                    "entity": "towel",
                    "attribute": "clean",
                    "change": "less likely"
                },
                {
                    "type": "openpi_entity",
                    "entity": "paper towel",
                    "attribute": "in watermelon",
                    "change": "more likely"
                },
                {
                    "type": "openpi_entity",
                    "entity": "paper towel",
                    "attribute": "on roll",
                    "change": "less likely"
                },
                {
                    "type": "openpi_entity",
                    "entity": "watermelon",
                    "attribute": "dry",
                    "change": "more likely"
                },
                {
                    "type": "openpi_entity",
                    "entity": "watermelon",
                    "attribute": "wet",
                    "change": "less likely"
                }
            ],
            [
                {
                    "type": "step",
                    "step": "Create the \"watermelon keg\".\u00c2\u00a0"
                },
                {
                    "type": "openpi_entity",
                    "entity": "watermelon",
                    "attribute": "neat",
                    "change": "more likely"
                },
                {
                    "type": "openpi_entity",
                    "entity": "watermelon",
                    "attribute": "messy",
                    "change": "less likely"
                },
                {
                    "type": "openpi_entity",
                    "entity": "watermelon",
                    "attribute": "adorned",
                    "change": "more likely"
                },
                {
                    "type": "openpi_entity",
                    "entity": "watermelon",
                    "attribute": "bare",
                    "change": "less likely"
                },
                {
                    "type": "openpi_entity",
                    "entity": "paper towel",
                    "attribute": "present",
                    "change": "more likely"
                },
                {
                    "type": "openpi_entity",
                    "entity": "paper towel",
                    "attribute": "absent",
                    "change": "less likely"
                },
                {
                    "type": "openpi_entity",
                    "entity": "watermelon",
                    "attribute": "decorated",
                    "change": "more likely"
                },
                {
                    "type": "openpi_entity",
                    "entity": "watermelon",
                    "attribute": "ungarnished",
                    "change": "less likely"
                },
                {
                    "type": "openpi_entity",
                    "entity": "watermelon",
                    "attribute": "divided",
                    "change": "more likely"
                },
                {
                    "type": "openpi_entity",
                    "entity": "watermelon",
                    "attribute": "piled",
                    "change": "less likely"
                }
            ],
            [
                {
                    "type": "step",
                    "step": "Fill the fruit keg with your favorite punch recipe."
                },
                {
                    "type": "openpi_entity",
                    "entity": "watermelon",
                    "attribute": "cool",
                    "change": "more likely"
                },
                {
                    "type": "openpi_entity",
                    "entity": "watermelon",
                    "attribute": "hot",
                    "change": "less likely"
                },
                {
                    "type": "openpi_entity",
                    "entity": "bowl",
                    "attribute": "cool",
                    "change": "more likely"
                },
                {
                    "type": "openpi_entity",
                    "entity": "bowl",
                    "attribute": "room temperature",
                    "change": "less likely"
                },
                {
                    "type": "openpi_entity",
                    "entity": "container",
                    "attribute": "empty",
                    "change": "more likely"
                },
                {
                    "type": "openpi_entity",
                    "entity": "container",
                    "attribute": "full",
                    "change": "less likely"
                },
                {
                    "type": "openpi_entity",
                    "entity": "watermelon",
                    "attribute": "cooked",
                    "change": "more likely"
                },
                {
                    "type": "openpi_entity",
                    "entity": "watermelon",
                    "attribute": "raw",
                    "change": "less likely"
                },
                {
                    "type": "openpi_entity",
                    "entity": "food",
                    "attribute": "inside bowl",
                    "change": "more likely"
                },
                {
                    "type": "openpi_entity",
                    "entity": "food",
                    "attribute": "outside of bowl",
                    "change": "less likely"
                },
                {
                    "type": "openpi_entity",
                    "entity": "watermelon",
                    "attribute": "cooler",
                    "change": "more likely"
                },
                {
                    "type": "openpi_entity",
                    "entity": "watermelon",
                    "attribute": "hot",
                    "change": "less likely"
                },
                {
                    "type": "openpi_entity",
                    "entity": "drink",
                    "attribute": "owned by the shopper",
                    "change": "more likely"
                },
                {
                    "type": "openpi_entity",
                    "entity": "drink",
                    "attribute": "owned by the store",
                    "change": "less likely"
                },
                {
                    "type": "openpi_entity",
                    "entity": "food",
                    "attribute": "in cup",
                    "change": "more likely"
                },
                {
                    "type": "openpi_entity",
                    "entity": "food",
                    "attribute": "in bowl",
                    "change": "less likely"
                },
                {
                    "type": "openpi_entity",
                    "entity": "batter",
                    "attribute": "in bowl",
                    "change": "more likely"
                },
                {
                    "type": "openpi_entity",
                    "entity": "batter",
                    "attribute": "in container",
                    "change": "less likely"
                }
            ],
            [
                {
                    "type": "step",
                    "step": "Test first!\u00c2\u00a0"
                },
                {
                    "type": "openpi_entity",
                    "entity": "food recipe",
                    "attribute": "learned",
                    "change": "more likely"
                },
                {
                    "type": "openpi_entity",
                    "entity": "food recipe",
                    "attribute": "unknown",
                    "change": "less likely"
                },
                {
                    "type": "openpi_entity",
                    "entity": "measuring cup",
                    "attribute": "open",
                    "change": "more likely"
                },
                {
                    "type": "openpi_entity",
                    "entity": "measuring cup",
                    "attribute": "closed",
                    "change": "less likely"
                },
                {
                    "type": "openpi_entity",
                    "entity": "watermelon",
                    "attribute": "filleted",
                    "change": "more likely"
                },
                {
                    "type": "openpi_entity",
                    "entity": "watermelon",
                    "attribute": "whole",
                    "change": "less likely"
                },
                {
                    "type": "openpi_entity",
                    "entity": "fish",
                    "attribute": "swimming",
                    "change": "more likely"
                },
                {
                    "type": "openpi_entity",
                    "entity": "fish",
                    "attribute": "still",
                    "change": "less likely"
                },
                {
                    "type": "openpi_entity",
                    "entity": "measuring cup",
                    "attribute": "on the table",
                    "change": "more likely"
                },
                {
                    "type": "openpi_entity",
                    "entity": "measuring cup",
                    "attribute": "in the drawer",
                    "change": "less likely"
                },
                {
                    "type": "openpi_entity",
                    "entity": "phone",
                    "attribute": "on",
                    "change": "more likely"
                },
                {
                    "type": "openpi_entity",
                    "entity": "phone",
                    "attribute": "off",
                    "change": "less likely"
                }
            ],
            [
                {
                    "type": "step",
                    "step": "Add watermelon."
                },
                {
                    "type": "openpi_entity",
                    "entity": "watermelon",
                    "attribute": "in glass",
                    "change": "more likely"
                },
                {
                    "type": "openpi_entity",
                    "entity": "watermelon",
                    "attribute": "in bowl",
                    "change": "less likely"
                },
                {
                    "type": "openpi_entity",
                    "entity": "watermelon",
                    "attribute": "in glass",
                    "change": "more likely"
                },
                {
                    "type": "openpi_entity",
                    "entity": "watermelon",
                    "attribute": "in bowl",
                    "change": "less likely"
                },
                {
                    "type": "openpi_entity",
                    "entity": "drink",
                    "attribute": "ready to drink",
                    "change": "more likely"
                },
                {
                    "type": "openpi_entity",
                    "entity": "drink",
                    "attribute": "unready",
                    "change": "less likely"
                },
                {
                    "type": "openpi_entity",
                    "entity": "bucket",
                    "attribute": "empty",
                    "change": "more likely"
                },
                {
                    "type": "openpi_entity",
                    "entity": "bucket",
                    "attribute": "full",
                    "change": "less likely"
                },
                {
                    "type": "openpi_entity",
                    "entity": "mixture",
                    "attribute": "smooth",
                    "change": "more likely"
                },
                {
                    "type": "openpi_entity",
                    "entity": "mixture",
                    "attribute": "bumpy",
                    "change": "less likely"
                },
                {
                    "type": "openpi_entity",
                    "entity": "glass",
                    "attribute": "wet",
                    "change": "more likely"
                },
                {
                    "type": "openpi_entity",
                    "entity": "glass",
                    "attribute": "dry",
                    "change": "less likely"
                },
                {
                    "type": "openpi_entity",
                    "entity": "watermelon",
                    "attribute": "in glass",
                    "change": "more likely"
                },
                {
                    "type": "openpi_entity",
                    "entity": "watermelon",
                    "attribute": "in plastic",
                    "change": "less likely"
                },
                {
                    "type": "openpi_entity",
                    "entity": "punch",
                    "attribute": "wet",
                    "change": "more likely"
                },
                {
                    "type": "openpi_entity",
                    "entity": "punch",
                    "attribute": "dry",
                    "change": "less likely"
                },
                {
                    "type": "openpi_entity",
                    "entity": "watermelon",
                    "attribute": "wobbling",
                    "change": "more likely"
                },
                {
                    "type": "openpi_entity",
                    "entity": "watermelon",
                    "attribute": "still",
                    "change": "less likely"
                }
            ],
            [
                {
                    "type": "step",
                    "step": "Place the watermelon keg on display.\u00c2\u00a0"
                },
                {
                    "type": "openpi_entity",
                    "entity": "watermelon",
                    "attribute": "in display case",
                    "change": "more likely"
                },
                {
                    "type": "openpi_entity",
                    "entity": "watermelon",
                    "attribute": "in bowl",
                    "change": "less likely"
                },
                {
                    "type": "openpi_entity",
                    "entity": "watermelon",
                    "attribute": "plated",
                    "change": "more likely"
                },
                {
                    "type": "openpi_entity",
                    "entity": "watermelon",
                    "attribute": "unplanted",
                    "change": "less likely"
                },
                {
                    "type": "openpi_entity",
                    "entity": "watermelon",
                    "attribute": "on display",
                    "change": "more likely"
                },
                {
                    "type": "openpi_entity",
                    "entity": "watermelon",
                    "attribute": "in bowl",
                    "change": "less likely"
                },
                {
                    "type": "openpi_entity",
                    "entity": "watermelon",
                    "attribute": "saved",
                    "change": "more likely"
                },
                {
                    "type": "openpi_entity",
                    "entity": "watermelon",
                    "attribute": "unsaved",
                    "change": "less likely"
                },
                {
                    "type": "openpi_entity",
                    "entity": "display",
                    "attribute": "heavier",
                    "change": "more likely"
                },
                {
                    "type": "openpi_entity",
                    "entity": "display",
                    "attribute": "lighter",
                    "change": "less likely"
                },
                {
                    "type": "openpi_entity",
                    "entity": "watermelon",
                    "attribute": "tested",
                    "change": "more likely"
                },
                {
                    "type": "openpi_entity",
                    "entity": "watermelon",
                    "attribute": "plated",
                    "change": "less likely"
                }
            ]
        ]
    },
    "14": {
        "goal": "Making Simple Eggnog",
        "annotator": "kuan wei",
        "steps": [
            [
                {
                    "step": "Start."
                }
            ],
            [
                {
                    "type": "step",
                    "step": "Create the milk mixture."
                },
                {
                    "type": "openpi_entity",
                    "entity": "milk mixture",
                    "attribute": "mixed with other ingredients",
                    "change": "more likely"
                },
                {
                    "type": "openpi_entity",
                    "entity": "milk mixture",
                    "attribute": "by itself",
                    "change": "less likely"
                },
                {
                    "type": "openpi_entity",
                    "entity": "milk",
                    "attribute": "in the bowl",
                    "change": "more likely"
                },
                {
                    "type": "openpi_entity",
                    "entity": "milk",
                    "attribute": "in a container",
                    "change": "less likely"
                },
                {
                    "type": "openpi_entity",
                    "entity": "container",
                    "attribute": "empty",
                    "change": "more likely"
                },
                {
                    "type": "openpi_entity",
                    "entity": "container",
                    "attribute": "full",
                    "change": "less likely"
                },
                {
                    "type": "openpi_entity",
                    "entity": "milk mixture",
                    "attribute": "in bowl",
                    "change": "more likely"
                },
                {
                    "type": "openpi_entity",
                    "entity": "milk mixture",
                    "attribute": "in refrigerator",
                    "change": "less likely"
                },
                {
                    "type": "openpi_entity",
                    "entity": "container",
                    "attribute": "lighter",
                    "change": "more likely"
                },
                {
                    "type": "openpi_entity",
                    "entity": "container",
                    "attribute": "heavier",
                    "change": "less likely"
                },
                {
                    "type": "openpi_entity",
                    "entity": "milk",
                    "attribute": "in bowl",
                    "change": "more likely"
                },
                {
                    "type": "openpi_entity",
                    "entity": "milk",
                    "attribute": "in carton",
                    "change": "less likely"
                }
            ],
            [
                {
                    "type": "step",
                    "step": "Make the egg mixture."
                },
                {
                    "type": "openpi_entity",
                    "entity": "egg mixture",
                    "attribute": "in bowl",
                    "change": "more likely"
                },
                {
                    "type": "openpi_entity",
                    "entity": "egg mixture",
                    "attribute": "in kitchen",
                    "change": "less likely"
                },
                {
                    "type": "openpi_entity",
                    "entity": "egg yolk",
                    "attribute": "broken",
                    "change": "more likely"
                },
                {
                    "type": "openpi_entity",
                    "entity": "egg yolk",
                    "attribute": "whole",
                    "change": "less likely"
                },
                {
                    "type": "openpi_entity",
                    "entity": "bowl",
                    "attribute": "hot",
                    "change": "more likely"
                },
                {
                    "type": "openpi_entity",
                    "entity": "bowl",
                    "attribute": "cool",
                    "change": "less likely"
                },
                {
                    "type": "openpi_entity",
                    "entity": "egg",
                    "attribute": "in the bowl",
                    "change": "more likely"
                },
                {
                    "type": "openpi_entity",
                    "entity": "egg",
                    "attribute": "in the fridge",
                    "change": "less likely"
                },
                {
                    "type": "openpi_entity",
                    "entity": "bowl",
                    "attribute": "wet",
                    "change": "more likely"
                },
                {
                    "type": "openpi_entity",
                    "entity": "bowl",
                    "attribute": "dry",
                    "change": "less likely"
                },
                {
                    "type": "openpi_entity",
                    "entity": "egg mixture",
                    "attribute": "cooked",
                    "change": "more likely"
                },
                {
                    "type": "openpi_entity",
                    "entity": "egg mixture",
                    "attribute": "uncooked",
                    "change": "less likely"
                },
                {
                    "type": "openpi_entity",
                    "entity": "milk mixture",
                    "attribute": "warmer",
                    "change": "more likely"
                },
                {
                    "type": "openpi_entity",
                    "entity": "milk mixture",
                    "attribute": "cooler",
                    "change": "less likely"
                },
                {
                    "type": "openpi_entity",
                    "entity": "egg yolk",
                    "attribute": "broken",
                    "change": "more likely"
                },
                {
                    "type": "openpi_entity",
                    "entity": "egg yolk",
                    "attribute": "whole",
                    "change": "less likely"
                },
                {
                    "type": "openpi_entity",
                    "entity": "mixing spoon",
                    "attribute": "wet",
                    "change": "more likely"
                },
                {
                    "type": "openpi_entity",
                    "entity": "mixing spoon",
                    "attribute": "dry",
                    "change": "less likely"
                },
                {
                    "type": "openpi_entity",
                    "entity": "egg mixture",
                    "attribute": "warm",
                    "change": "more likely"
                },
                {
                    "type": "openpi_entity",
                    "entity": "egg mixture",
                    "attribute": "cool",
                    "change": "less likely"
                },
                {
                    "type": "openpi_entity",
                    "entity": "egg mixture",
                    "attribute": "inside of bowl",
                    "change": "more likely"
                },
                {
                    "type": "openpi_entity",
                    "entity": "egg mixture",
                    "attribute": "outside of bowl",
                    "change": "less likely"
                },
                {
                    "type": "openpi_entity",
                    "entity": "mixing bowl",
                    "attribute": "fuller",
                    "change": "more likely"
                },
                {
                    "type": "openpi_entity",
                    "entity": "mixing bowl",
                    "attribute": "empty",
                    "change": "less likely"
                }
            ],
            [
                {
                    "type": "step",
                    "step": "Add the milk mixture slowly to the egg mixture and cook.\u00c2\u00a0"
                },
                {
                    "type": "openpi_entity",
                    "entity": "egg mixture",
                    "attribute": "wet",
                    "change": "more likely"
                },
                {
                    "type": "openpi_entity",
                    "entity": "egg mixture",
                    "attribute": "dry",
                    "change": "less likely"
                },
                {
                    "type": "openpi_entity",
                    "entity": "mixing bowl",
                    "attribute": "full",
                    "change": "more likely"
                },
                {
                    "type": "openpi_entity",
                    "entity": "mixing bowl",
                    "attribute": "empty",
                    "change": "less likely"
                },
                {
                    "type": "openpi_entity",
                    "entity": "egg mixture",
                    "attribute": "warmer",
                    "change": "more likely"
                },
                {
                    "type": "openpi_entity",
                    "entity": "egg mixture",
                    "attribute": "cooler",
                    "change": "less likely"
                },
                {
                    "type": "openpi_entity",
                    "entity": "mixture",
                    "attribute": "moist",
                    "change": "more likely"
                },
                {
                    "type": "openpi_entity",
                    "entity": "mixture",
                    "attribute": "dry",
                    "change": "less likely"
                },
                {
                    "type": "openpi_entity",
                    "entity": "egg mixture",
                    "attribute": "hot",
                    "change": "more likely"
                },
                {
                    "type": "openpi_entity",
                    "entity": "egg mixture",
                    "attribute": "cool",
                    "change": "less likely"
                },
                {
                    "type": "openpi_entity",
                    "entity": "mixing bowl",
                    "attribute": "containing milk",
                    "change": "more likely"
                },
                {
                    "type": "openpi_entity",
                    "entity": "mixing bowl",
                    "attribute": "empty",
                    "change": "less likely"
                },
                {
                    "type": "openpi_entity",
                    "entity": "milk mixture",
                    "attribute": "wet",
                    "change": "more likely"
                },
                {
                    "type": "openpi_entity",
                    "entity": "milk mixture",
                    "attribute": "dry",
                    "change": "less likely"
                },
                {
                    "type": "openpi_entity",
                    "entity": "milk mixture",
                    "attribute": "hot",
                    "change": "more likely"
                },
                {
                    "type": "openpi_entity",
                    "entity": "milk mixture",
                    "attribute": "cold",
                    "change": "less likely"
                },
                {
                    "type": "openpi_entity",
                    "entity": "milk mixture",
                    "attribute": "heated",
                    "change": "more likely"
                },
                {
                    "type": "openpi_entity",
                    "entity": "milk mixture",
                    "attribute": "room temperature",
                    "change": "less likely"
                }
            ],
            [
                {
                    "type": "step",
                    "step": "Remove the eggnog from the burner."
                },
                {
                    "type": "openpi_entity",
                    "entity": "stove",
                    "attribute": "off",
                    "change": "more likely"
                },
                {
                    "type": "openpi_entity",
                    "entity": "stove",
                    "attribute": "on",
                    "change": "less likely"
                },
                {
                    "type": "openpi_entity",
                    "entity": "eggnog",
                    "attribute": "warmer",
                    "change": "more likely"
                },
                {
                    "type": "openpi_entity",
                    "entity": "eggnog",
                    "attribute": "cold",
                    "change": "less likely"
                },
                {
                    "type": "openpi_entity",
                    "entity": "eggnog",
                    "attribute": "in ash pile",
                    "change": "more likely"
                },
                {
                    "type": "openpi_entity",
                    "entity": "eggnog",
                    "attribute": "in bowl",
                    "change": "less likely"
                },
                {
                    "type": "openpi_entity",
                    "entity": "eggnog",
                    "attribute": "warm",
                    "change": "more likely"
                },
                {
                    "type": "openpi_entity",
                    "entity": "eggnog",
                    "attribute": "hot",
                    "change": "less likely"
                },
                {
                    "type": "openpi_entity",
                    "entity": "egg mixture",
                    "attribute": "cooler",
                    "change": "more likely"
                },
                {
                    "type": "openpi_entity",
                    "entity": "egg mixture",
                    "attribute": "hot",
                    "change": "less likely"
                },
                {
                    "type": "openpi_entity",
                    "entity": "egg mixture",
                    "attribute": "removed",
                    "change": "more likely"
                },
                {
                    "type": "openpi_entity",
                    "entity": "egg mixture",
                    "attribute": "in the mixture",
                    "change": "less likely"
                },
                {
                    "type": "openpi_entity",
                    "entity": "eggnog",
                    "attribute": "warm",
                    "change": "more likely"
                },
                {
                    "type": "openpi_entity",
                    "entity": "eggnog",
                    "attribute": "hot",
                    "change": "less likely"
                },
                {
                    "type": "openpi_entity",
                    "entity": "spoon",
                    "attribute": "dirty",
                    "change": "more likely"
                },
                {
                    "type": "openpi_entity",
                    "entity": "spoon",
                    "attribute": "clean",
                    "change": "less likely"
                },
                {
                    "type": "openpi_entity",
                    "entity": "eggnog",
                    "attribute": "in the ash pile",
                    "change": "more likely"
                },
                {
                    "type": "openpi_entity",
                    "entity": "eggnog",
                    "attribute": "in the pan",
                    "change": "less likely"
                },
                {
                    "type": "openpi_entity",
                    "entity": "eggnog",
                    "attribute": "out of the shell",
                    "change": "more likely"
                },
                {
                    "type": "openpi_entity",
                    "entity": "eggnog",
                    "attribute": "inside the shell",
                    "change": "less likely"
                },
                {
                    "type": "openpi_entity",
                    "entity": "eggnog",
                    "attribute": "in the ash pile",
                    "change": "more likely"
                },
                {
                    "type": "openpi_entity",
                    "entity": "eggnog",
                    "attribute": "in the bowl",
                    "change": "less likely"
                },
                {
                    "type": "openpi_entity",
                    "entity": "bowl",
                    "attribute": "dirty",
                    "change": "more likely"
                },
                {
                    "type": "openpi_entity",
                    "entity": "bowl",
                    "attribute": "clean",
                    "change": "less likely"
                }
            ],
            [
                {
                    "type": "step",
                    "step": "Add the remaining the ingredients.\u00c2\u00a0"
                },
                {
                    "type": "openpi_entity",
                    "entity": "egg mixture",
                    "attribute": "in  bowl",
                    "change": "more likely"
                },
                {
                    "type": "openpi_entity",
                    "entity": "egg mixture",
                    "attribute": "on counter",
                    "change": "less likely"
                },
                {
                    "type": "openpi_entity",
                    "entity": "egg mixture",
                    "attribute": "roiling",
                    "change": "more likely"
                },
                {
                    "type": "openpi_entity",
                    "entity": "egg mixture",
                    "attribute": "standing",
                    "change": "less likely"
                },
                {
                    "type": "openpi_entity",
                    "entity": "bowl",
                    "attribute": "heavier",
                    "change": "more likely"
                },
                {
                    "type": "openpi_entity",
                    "entity": "bowl",
                    "attribute": "lighter",
                    "change": "less likely"
                }
            ],
            [
                {
                    "type": "step",
                    "step": "Cover the eggnog tightly with plastic wrap."
                },
                {
                    "type": "openpi_entity",
                    "entity": "eggnog",
                    "attribute": "covered",
                    "change": "more likely"
                },
                {
                    "type": "openpi_entity",
                    "entity": "eggnog",
                    "attribute": "open",
                    "change": "less likely"
                },
                {
                    "type": "openpi_entity",
                    "entity": "eggnog",
                    "attribute": "covered",
                    "change": "more likely"
                },
                {
                    "type": "openpi_entity",
                    "entity": "eggnog",
                    "attribute": "uncovered",
                    "change": "less likely"
                },
                {
                    "type": "openpi_entity",
                    "entity": "eggnog",
                    "attribute": "covered",
                    "change": "more likely"
                },
                {
                    "type": "openpi_entity",
                    "entity": "eggnog",
                    "attribute": "uncovered",
                    "change": "less likely"
                },
                {
                    "type": "openpi_entity",
                    "entity": "eggnog",
                    "attribute": "covered",
                    "change": "more likely"
                },
                {
                    "type": "openpi_entity",
                    "entity": "eggnog",
                    "attribute": "exposed",
                    "change": "less likely"
                },
                {
                    "type": "openpi_entity",
                    "entity": "eggnog",
                    "attribute": "covered",
                    "change": "more likely"
                },
                {
                    "type": "openpi_entity",
                    "entity": "eggnog",
                    "attribute": "open",
                    "change": "less likely"
                },
                {
                    "type": "openpi_entity",
                    "entity": "plastic wrap",
                    "attribute": "on eggnog",
                    "change": "more likely"
                },
                {
                    "type": "openpi_entity",
                    "entity": "plastic wrap",
                    "attribute": "on roll",
                    "change": "less likely"
                },
                {
                    "type": "openpi_entity",
                    "entity": "egg",
                    "attribute": "covered with pan",
                    "change": "more likely"
                },
                {
                    "type": "openpi_entity",
                    "entity": "egg",
                    "attribute": "free of pan",
                    "change": "less likely"
                },
                {
                    "type": "openpi_entity",
                    "entity": "plastic wrap",
                    "attribute": "secured",
                    "change": "more likely"
                },
                {
                    "type": "openpi_entity",
                    "entity": "plastic wrap",
                    "attribute": "loose",
                    "change": "less likely"
                },
                {
                    "type": "openpi_entity",
                    "entity": "pan",
                    "attribute": "on the table",
                    "change": "more likely"
                },
                {
                    "type": "openpi_entity",
                    "entity": "pan",
                    "attribute": "in the cabinet",
                    "change": "less likely"
                }
            ]
        ]
    },
    "15": {
        "goal": "How to Make Sbiten",
        "annotator": "kuan wei",
        "steps": [
            [
                {
                    "step": "Start."
                }
            ],
            [
                {
                    "type": "step",
                    "step": "Bring 10 1/4 cups of water to a boil."
                },
                {
                    "type": "entity",
                    "entity": "water",
                    "attribute": "cold",
                    "change": "less likely"
                },
                {
                    "type": "multihop",
                    "event": "I drink the water.",
                    "change": "less likely"
                },
                {
                    "type": "openpi_entity",
                    "entity": "stove",
                    "attribute": "on",
                    "change": "more likely"
                },
                {
                    "type": "openpi_entity",
                    "entity": "stove",
                    "attribute": "off",
                    "change": "less likely"
                },
                {
                    "type": "openpi_entity",
                    "entity": "mixture",
                    "attribute": "boiling",
                    "change": "more likely"
                },
                {
                    "type": "openpi_entity",
                    "entity": "mixture",
                    "attribute": "stewed",
                    "change": "less likely"
                },
                {
                    "type": "openpi_entity",
                    "entity": "water",
                    "attribute": "boiling",
                    "change": "more likely"
                },
                {
                    "type": "openpi_entity",
                    "entity": "water",
                    "attribute": "cold",
                    "change": "less likely"
                },
                {
                    "type": "openpi_entity",
                    "entity": "water faucet",
                    "attribute": "turned on",
                    "change": "more likely"
                },
                {
                    "type": "openpi_entity",
                    "entity": "water faucet",
                    "attribute": "off",
                    "change": "less likely"
                },
                {
                    "type": "openpi_entity",
                    "entity": "water",
                    "attribute": "boiling",
                    "change": "more likely"
                },
                {
                    "type": "openpi_entity",
                    "entity": "water",
                    "attribute": "still",
                    "change": "less likely"
                },
                {
                    "type": "openpi_entity",
                    "entity": "pan",
                    "attribute": "hot",
                    "change": "more likely"
                },
                {
                    "type": "openpi_entity",
                    "entity": "pan",
                    "attribute": "cool",
                    "change": "less likely"
                },
                {
                    "type": "openpi_entity",
                    "entity": "mixture",
                    "attribute": "boiling",
                    "change": "more likely"
                },
                {
                    "type": "openpi_entity",
                    "entity": "mixture",
                    "attribute": "still",
                    "change": "less likely"
                },
                {
                    "type": "openpi_entity",
                    "entity": "stove",
                    "attribute": "on",
                    "change": "more likely"
                },
                {
                    "type": "openpi_entity",
                    "entity": "stove",
                    "attribute": "off",
                    "change": "less likely"
                },
                {
                    "type": "openpi_entity",
                    "entity": "water",
                    "attribute": "strong smelling",
                    "change": "more likely"
                },
                {
                    "type": "openpi_entity",
                    "entity": "water",
                    "attribute": "bland smelling",
                    "change": "less likely"
                },
                {
                    "type": "openpi_entity",
                    "entity": "pot",
                    "attribute": "full of puddling",
                    "change": "more likely"
                },
                {
                    "type": "openpi_entity",
                    "entity": "pot",
                    "attribute": "mostly clean",
                    "change": "less likely"
                },
                {
                    "type": "openpi_entity",
                    "entity": "water",
                    "attribute": "hotter",
                    "change": "more likely"
                },
                {
                    "type": "openpi_entity",
                    "entity": "water",
                    "attribute": "room temp",
                    "change": "less likely"
                },
                {
                    "type": "openpi_entity",
                    "entity": "water",
                    "attribute": "hot",
                    "change": "more likely"
                },
                {
                    "type": "openpi_entity",
                    "entity": "water",
                    "attribute": "cool",
                    "change": "less likely"
                },
                {
                    "type": "openpi_entity",
                    "entity": "water",
                    "attribute": "hot",
                    "change": "more likely"
                },
                {
                    "type": "openpi_entity",
                    "entity": "water",
                    "attribute": "cool",
                    "change": "less likely"
                }
            ],
            [
                {
                    "type": "step",
                    "step": "Add the ginger, nutmeg, cloves, cinnamon, honey and\u00c2\u00a0homemade blackberry jam\u00c2\u00a0and stir gently."
                },
                {
                    "type": "openpi_entity",
                    "entity": "ginger",
                    "attribute": "in bowl",
                    "change": "more likely"
                },
                {
                    "type": "openpi_entity",
                    "entity": "ginger",
                    "attribute": "in fridge",
                    "change": "less likely"
                },
                {
                    "type": "openpi_entity",
                    "entity": "mixture",
                    "attribute": "colored",
                    "change": "more likely"
                },
                {
                    "type": "openpi_entity",
                    "entity": "mixture",
                    "attribute": "white",
                    "change": "less likely"
                },
                {
                    "type": "openpi_entity",
                    "entity": "counter",
                    "attribute": "heavier",
                    "change": "more likely"
                },
                {
                    "type": "openpi_entity",
                    "entity": "counter",
                    "attribute": "light",
                    "change": "less likely"
                },
                {
                    "type": "openpi_entity",
                    "entity": "ginger",
                    "attribute": "in bowl",
                    "change": "more likely"
                },
                {
                    "type": "openpi_entity",
                    "entity": "ginger",
                    "attribute": "in bag",
                    "change": "less likely"
                },
                {
                    "type": "openpi_entity",
                    "entity": "cinnamon",
                    "attribute": "inside bowl",
                    "change": "more likely"
                },
                {
                    "type": "openpi_entity",
                    "entity": "cinnamon",
                    "attribute": "outside of bowl",
                    "change": "less likely"
                },
                {
                    "type": "openpi_entity",
                    "entity": "bowl",
                    "attribute": "heavier",
                    "change": "more likely"
                },
                {
                    "type": "openpi_entity",
                    "entity": "bowl",
                    "attribute": "lighter",
                    "change": "less likely"
                }
            ],
            [
                {
                    "type": "step",
                    "step": "Turn the heat down to about medium-low and bring it to a simmer.\u00c2\u00a0"
                },
                {
                    "type": "openpi_entity",
                    "entity": "mixture",
                    "attribute": "simmering",
                    "change": "more likely"
                },
                {
                    "type": "openpi_entity",
                    "entity": "mixture",
                    "attribute": "still",
                    "change": "less likely"
                },
                {
                    "type": "openpi_entity",
                    "entity": "stove",
                    "attribute": "hot",
                    "change": "more likely"
                },
                {
                    "type": "openpi_entity",
                    "entity": "stove",
                    "attribute": "cold",
                    "change": "less likely"
                },
                {
                    "type": "openpi_entity",
                    "entity": "stove",
                    "attribute": "on",
                    "change": "more likely"
                },
                {
                    "type": "openpi_entity",
                    "entity": "stove",
                    "attribute": "off",
                    "change": "less likely"
                },
                {
                    "type": "openpi_entity",
                    "entity": "mixture",
                    "attribute": "simmering",
                    "change": "more likely"
                },
                {
                    "type": "openpi_entity",
                    "entity": "mixture",
                    "attribute": "boiling",
                    "change": "less likely"
                },
                {
                    "type": "openpi_entity",
                    "entity": "stove top",
                    "attribute": "hot",
                    "change": "more likely"
                },
                {
                    "type": "openpi_entity",
                    "entity": "stove top",
                    "attribute": "cold",
                    "change": "less likely"
                },
                {
                    "type": "openpi_entity",
                    "entity": "heat",
                    "attribute": "on",
                    "change": "more likely"
                },
                {
                    "type": "openpi_entity",
                    "entity": "heat",
                    "attribute": "off",
                    "change": "less likely"
                }
            ],
            [
                {
                    "type": "step",
                    "step": "Let cool for 2 minutes.\u00c2\u00a0"
                },
                {
                    "type": "multihop",
                    "event": "I drink the water.",
                    "change": "more likely"
                },
                {
                    "type": "openpi_entity",
                    "entity": "mixture",
                    "attribute": "cooler",
                    "change": "more likely"
                },
                {
                    "type": "openpi_entity",
                    "entity": "mixture",
                    "attribute": "hot",
                    "change": "less likely"
                },
                {
                    "type": "openpi_entity",
                    "entity": "mix",
                    "attribute": "cooled",
                    "change": "more likely"
                },
                {
                    "type": "openpi_entity",
                    "entity": "mix",
                    "attribute": "hot",
                    "change": "less likely"
                },
                {
                    "type": "openpi_entity",
                    "entity": "ginger",
                    "attribute": "soft",
                    "change": "more likely"
                },
                {
                    "type": "openpi_entity",
                    "entity": "ginger",
                    "attribute": "firm",
                    "change": "less likely"
                },
                {
                    "type": "openpi_entity",
                    "entity": "mixture",
                    "attribute": "cooler",
                    "change": "more likely"
                },
                {
                    "type": "openpi_entity",
                    "entity": "mixture",
                    "attribute": "hot",
                    "change": "less likely"
                },
                {
                    "type": "openpi_entity",
                    "entity": "mixture",
                    "attribute": "cool",
                    "change": "more likely"
                },
                {
                    "type": "openpi_entity",
                    "entity": "mixture",
                    "attribute": "hot",
                    "change": "less likely"
                },
                {
                    "type": "openpi_entity",
                    "entity": "ginger",
                    "attribute": "cooler",
                    "change": "more likely"
                },
                {
                    "type": "openpi_entity",
                    "entity": "ginger",
                    "attribute": "hot",
                    "change": "less likely"
                }
            ],
            [
                {
                    "type": "step",
                    "step": "Garnish with a\u00c2\u00a0homemade mint leaf candy\u00c2\u00a0and enjoy!"
                },
                {
                    "type": "openpi_entity",
                    "entity": "cake",
                    "attribute": "heavier",
                    "change": "more likely"
                },
                {
                    "type": "openpi_entity",
                    "entity": "cake",
                    "attribute": "lighter",
                    "change": "less likely"
                },
                {
                    "type": "openpi_entity",
                    "entity": "candy",
                    "attribute": "on cake",
                    "change": "more likely"
                },
                {
                    "type": "openpi_entity",
                    "entity": "candy",
                    "attribute": "in container",
                    "change": "less likely"
                },
                {
                    "type": "openpi_entity",
                    "entity": "candy",
                    "attribute": "cool",
                    "change": "more likely"
                },
                {
                    "type": "openpi_entity",
                    "entity": "candy",
                    "attribute": "hot",
                    "change": "less likely"
                },
                {
                    "type": "openpi_entity",
                    "entity": "candy",
                    "attribute": "on a cake",
                    "change": "more likely"
                },
                {
                    "type": "openpi_entity",
                    "entity": "candy",
                    "attribute": "in a container",
                    "change": "less likely"
                },
                {
                    "type": "openpi_entity",
                    "entity": "candy",
                    "attribute": "warmer",
                    "change": "more likely"
                },
                {
                    "type": "openpi_entity",
                    "entity": "candy",
                    "attribute": "cold",
                    "change": "less likely"
                },
                {
                    "type": "openpi_entity",
                    "entity": "cake",
                    "attribute": "hot",
                    "change": "more likely"
                },
                {
                    "type": "openpi_entity",
                    "entity": "cake",
                    "attribute": "cold",
                    "change": "less likely"
                },
                {
                    "type": "openpi_entity",
                    "entity": "mint leaf candy",
                    "attribute": "warm",
                    "change": "more likely"
                },
                {
                    "type": "openpi_entity",
                    "entity": "mint leaf candy",
                    "attribute": "cool",
                    "change": "less likely"
                },
                {
                    "type": "openpi_entity",
                    "entity": "candy",
                    "attribute": "on top of candy",
                    "change": "more likely"
                },
                {
                    "type": "openpi_entity",
                    "entity": "candy",
                    "attribute": "in pan",
                    "change": "less likely"
                },
                {
                    "type": "openpi_entity",
                    "entity": "mint leaf candy",
                    "attribute": "on cake",
                    "change": "more likely"
                },
                {
                    "type": "openpi_entity",
                    "entity": "mint leaf candy",
                    "attribute": "on spoon",
                    "change": "less likely"
                },
                {
                    "type": "openpi_entity",
                    "entity": "candy container",
                    "attribute": "lighter",
                    "change": "more likely"
                },
                {
                    "type": "openpi_entity",
                    "entity": "candy container",
                    "attribute": "heavier",
                    "change": "less likely"
                },
                {
                    "type": "openpi_entity",
                    "entity": "cake",
                    "attribute": "hot",
                    "change": "more likely"
                },
                {
                    "type": "openpi_entity",
                    "entity": "cake",
                    "attribute": "cool",
                    "change": "less likely"
                },
                {
                    "type": "openpi_entity",
                    "entity": "garnish",
                    "attribute": "dirty",
                    "change": "more likely"
                },
                {
                    "type": "openpi_entity",
                    "entity": "garnish",
                    "attribute": "clean",
                    "change": "less likely"
                }
            ]
        ]
    },
    "16": {
        "goal": "How to Cool a Hot Drink Quickly",
        "annotator": "kuan wei",
        "steps": [
            [
                {
                    "step": "Start."
                }
            ],
            [
                {
                    "type": "step",
                    "step": "Take your drink and pour it from one cup to the other cup."
                },
                {
                    "type": "openpi_entity",
                    "entity": "hand",
                    "attribute": "holding cup",
                    "change": "more likely"
                },
                {
                    "type": "openpi_entity",
                    "entity": "hand",
                    "attribute": "empty",
                    "change": "less likely"
                },
                {
                    "type": "openpi_entity",
                    "entity": "drink",
                    "attribute": "in cup",
                    "change": "more likely"
                },
                {
                    "type": "openpi_entity",
                    "entity": "drink",
                    "attribute": "outside of cupboard",
                    "change": "less likely"
                },
                {
                    "type": "openpi_entity",
                    "entity": "drink",
                    "attribute": "heavy",
                    "change": "more likely"
                },
                {
                    "type": "openpi_entity",
                    "entity": "drink",
                    "attribute": "light",
                    "change": "less likely"
                },
                {
                    "type": "openpi_entity",
                    "entity": "drink",
                    "attribute": "in hand",
                    "change": "more likely"
                },
                {
                    "type": "openpi_entity",
                    "entity": "drink",
                    "attribute": "in cupboard",
                    "change": "less likely"
                },
                {
                    "type": "openpi_entity",
                    "entity": "cup",
                    "attribute": "wet",
                    "change": "more likely"
                },
                {
                    "type": "openpi_entity",
                    "entity": "cup",
                    "attribute": "dry",
                    "change": "less likely"
                },
                {
                    "type": "openpi_entity",
                    "entity": "cup",
                    "attribute": "full",
                    "change": "more likely"
                },
                {
                    "type": "openpi_entity",
                    "entity": "cup",
                    "attribute": "empty",
                    "change": "less likely"
                },
                {
                    "type": "openpi_entity",
                    "entity": "cup",
                    "attribute": "full",
                    "change": "more likely"
                },
                {
                    "type": "openpi_entity",
                    "entity": "cup",
                    "attribute": "empty",
                    "change": "less likely"
                },
                {
                    "type": "openpi_entity",
                    "entity": "cup",
                    "attribute": "wet",
                    "change": "more likely"
                },
                {
                    "type": "openpi_entity",
                    "entity": "cup",
                    "attribute": "dry",
                    "change": "less likely"
                },
                {
                    "type": "openpi_entity",
                    "entity": "drink",
                    "attribute": "alcoholic",
                    "change": "more likely"
                },
                {
                    "type": "openpi_entity",
                    "entity": "drink",
                    "attribute": "non-alcoholic",
                    "change": "less likely"
                }
            ],
            [
                {
                    "type": "step",
                    "step": "Repeat until your drink has cooled down."
                },
                {
                    "type": "entity",
                    "entity": "drink",
                    "attribute": "cold",
                    "change": "more likely"
                },
                {
                    "type": "multihop",
                    "event": "I drink the drink.",
                    "change": "more likely"
                },
                {
                    "type": "openpi_entity",
                    "entity": "drink",
                    "attribute": "agitated",
                    "change": "more likely"
                },
                {
                    "type": "openpi_entity",
                    "entity": "drink",
                    "attribute": "still",
                    "change": "less likely"
                },
                {
                    "type": "openpi_entity",
                    "entity": "person",
                    "attribute": "drinking the shot",
                    "change": "more likely"
                },
                {
                    "type": "openpi_entity",
                    "entity": "person",
                    "attribute": "idle",
                    "change": "less likely"
                },
                {
                    "type": "openpi_entity",
                    "entity": "drink",
                    "attribute": "cool",
                    "change": "more likely"
                },
                {
                    "type": "openpi_entity",
                    "entity": "drink",
                    "attribute": "room temperature",
                    "change": "less likely"
                }
            ],
            [
                {
                    "type": "step",
                    "step": "Once it has cooled down, enjoy your drink."
                },
                {
                    "type": "openpi_entity",
                    "entity": "person",
                    "attribute": "seated",
                    "change": "more likely"
                },
                {
                    "type": "openpi_entity",
                    "entity": "person",
                    "attribute": "standing",
                    "change": "less likely"
                },
                {
                    "type": "openpi_entity",
                    "entity": "drink",
                    "attribute": "dry",
                    "change": "more likely"
                },
                {
                    "type": "openpi_entity",
                    "entity": "drink",
                    "attribute": "wet",
                    "change": "less likely"
                },
                {
                    "type": "openpi_entity",
                    "entity": "drink",
                    "attribute": "cooler",
                    "change": "more likely"
                },
                {
                    "type": "openpi_entity",
                    "entity": "drink",
                    "attribute": "warmer",
                    "change": "less likely"
                },
                {
                    "type": "openpi_entity",
                    "entity": "table",
                    "attribute": "empty",
                    "change": "more likely"
                },
                {
                    "type": "openpi_entity",
                    "entity": "table",
                    "attribute": "occupied",
                    "change": "less likely"
                },
                {
                    "type": "openpi_entity",
                    "entity": "drink",
                    "attribute": "in guest's hand",
                    "change": "more likely"
                },
                {
                    "type": "openpi_entity",
                    "entity": "drink",
                    "attribute": "in cupboard",
                    "change": "less likely"
                },
                {
                    "type": "openpi_entity",
                    "entity": "drink",
                    "attribute": "cooled",
                    "change": "more likely"
                },
                {
                    "type": "openpi_entity",
                    "entity": "drink",
                    "attribute": "warm",
                    "change": "less likely"
                },
                {
                    "type": "openpi_entity",
                    "entity": "drink",
                    "attribute": "cool",
                    "change": "more likely"
                },
                {
                    "type": "openpi_entity",
                    "entity": "drink",
                    "attribute": "hot",
                    "change": "less likely"
                }
            ]
        ]
    },
    "17": {
        "goal": "How to Make Hot Cocoa",
        "annotator": "kuan wei",
        "steps": [
            [
                {
                    "step": "Start."
                }
            ],
            [
                {
                    "type": "step",
                    "step": "Put the milk, sugar, and cocoa powder in a saucepan."
                },
                {
                    "type": "openpi_entity",
                    "entity": "mixing bowl",
                    "attribute": "on the counter",
                    "change": "more likely"
                },
                {
                    "type": "openpi_entity",
                    "entity": "mixing bowl",
                    "attribute": "in the cupboard",
                    "change": "less likely"
                },
                {
                    "type": "openpi_entity",
                    "entity": "measuring cup",
                    "attribute": "dirty",
                    "change": "more likely"
                },
                {
                    "type": "openpi_entity",
                    "entity": "measuring cup",
                    "attribute": "clean",
                    "change": "less likely"
                },
                {
                    "type": "openpi_entity",
                    "entity": "mixing bowl",
                    "attribute": "fuller",
                    "change": "more likely"
                },
                {
                    "type": "openpi_entity",
                    "entity": "mixing bowl",
                    "attribute": "empty",
                    "change": "less likely"
                },
                {
                    "type": "openpi_entity",
                    "entity": "sugar",
                    "attribute": "heated",
                    "change": "more likely"
                },
                {
                    "type": "openpi_entity",
                    "entity": "sugar",
                    "attribute": "room temperature",
                    "change": "less likely"
                },
                {
                    "type": "openpi_entity",
                    "entity": "cocoa powder",
                    "attribute": "in the pan",
                    "change": "more likely"
                },
                {
                    "type": "openpi_entity",
                    "entity": "cocoa powder",
                    "attribute": "in the wrapper",
                    "change": "less likely"
                },
                {
                    "type": "openpi_entity",
                    "entity": "saucepan",
                    "attribute": "full",
                    "change": "more likely"
                },
                {
                    "type": "openpi_entity",
                    "entity": "saucepan",
                    "attribute": "empty",
                    "change": "less likely"
                },
                {
                    "type": "openpi_entity",
                    "entity": "saucepan",
                    "attribute": "filled with ingredients",
                    "change": "more likely"
                },
                {
                    "type": "openpi_entity",
                    "entity": "saucepan",
                    "attribute": "empty",
                    "change": "less likely"
                },
                {
                    "type": "openpi_entity",
                    "entity": "saucepan",
                    "attribute": "heavy",
                    "change": "more likely"
                },
                {
                    "type": "openpi_entity",
                    "entity": "saucepan",
                    "attribute": "light",
                    "change": "less likely"
                },
                {
                    "type": "openpi_entity",
                    "entity": "sugar",
                    "attribute": "in the pan",
                    "change": "more likely"
                },
                {
                    "type": "openpi_entity",
                    "entity": "sugar",
                    "attribute": "in the container",
                    "change": "less likely"
                },
                {
                    "type": "openpi_entity",
                    "entity": "saucepan",
                    "attribute": "hot",
                    "change": "more likely"
                },
                {
                    "type": "openpi_entity",
                    "entity": "saucepan",
                    "attribute": "cool",
                    "change": "less likely"
                }
            ],
            [
                {
                    "type": "step",
                    "step": "Simmer the hot cocoa over medium heat for about 8 to 10 minutes."
                },
                {
                    "type": "openpi_entity",
                    "entity": "the saucepan",
                    "attribute": "fuller",
                    "change": "more likely"
                },
                {
                    "type": "openpi_entity",
                    "entity": "the saucepan",
                    "attribute": "empty",
                    "change": "less likely"
                },
                {
                    "type": "openpi_entity",
                    "entity": "cocoa powder",
                    "attribute": "melted",
                    "change": "more likely"
                },
                {
                    "type": "openpi_entity",
                    "entity": "cocoa powder",
                    "attribute": "hard",
                    "change": "less likely"
                },
                {
                    "type": "openpi_entity",
                    "entity": "cocoa powder",
                    "attribute": "warm",
                    "change": "more likely"
                },
                {
                    "type": "openpi_entity",
                    "entity": "cocoa powder",
                    "attribute": "cold",
                    "change": "less likely"
                },
                {
                    "type": "openpi_entity",
                    "entity": "cocoa",
                    "attribute": "hot",
                    "change": "more likely"
                },
                {
                    "type": "openpi_entity",
                    "entity": "cocoa",
                    "attribute": "room temperature",
                    "change": "less likely"
                },
                {
                    "type": "openpi_entity",
                    "entity": "mixture",
                    "attribute": "hotter",
                    "change": "more likely"
                },
                {
                    "type": "openpi_entity",
                    "entity": "mixture",
                    "attribute": "colder",
                    "change": "less likely"
                },
                {
                    "type": "openpi_entity",
                    "entity": "mixture",
                    "attribute": "in pan",
                    "change": "more likely"
                },
                {
                    "type": "openpi_entity",
                    "entity": "mixture",
                    "attribute": "in saucepan",
                    "change": "less likely"
                },
                {
                    "type": "openpi_entity",
                    "entity": "cocoa powder",
                    "attribute": "hot",
                    "change": "more likely"
                },
                {
                    "type": "openpi_entity",
                    "entity": "cocoa powder",
                    "attribute": "room temperature",
                    "change": "less likely"
                },
                {
                    "type": "openpi_entity",
                    "entity": "the pan",
                    "attribute": "filled with hot cocoa",
                    "change": "more likely"
                },
                {
                    "type": "openpi_entity",
                    "entity": "the pan",
                    "attribute": "empty",
                    "change": "less likely"
                },
                {
                    "type": "openpi_entity",
                    "entity": "hot cocoa",
                    "attribute": "hot",
                    "change": "more likely"
                },
                {
                    "type": "openpi_entity",
                    "entity": "hot cocoa",
                    "attribute": "cold",
                    "change": "less likely"
                },
                {
                    "type": "openpi_entity",
                    "entity": "hot cocoa",
                    "attribute": "in saucepan",
                    "change": "more likely"
                },
                {
                    "type": "openpi_entity",
                    "entity": "hot cocoa",
                    "attribute": "missing from saucepan",
                    "change": "less likely"
                },
                {
                    "type": "openpi_entity",
                    "entity": "cocoa powder",
                    "attribute": "in the pan",
                    "change": "more likely"
                },
                {
                    "type": "openpi_entity",
                    "entity": "cocoa powder",
                    "attribute": "in a package",
                    "change": "less likely"
                }
            ],
            [
                {
                    "type": "step",
                    "step": "Stir in the vanilla and pour the cocoa into mugs.\u00c2\u00a0"
                },
                {
                    "type": "entity",
                    "entity": "the cocoa",
                    "attribute": "in mugs",
                    "change": "more likely"
                },
                {
                    "type": "multihop",
                    "event": "I drink the cocoa from mugs.",
                    "change": "more likely"
                },
                {
                    "type": "openpi_entity",
                    "entity": "mixture",
                    "attribute": "boiled",
                    "change": "more likely"
                },
                {
                    "type": "openpi_entity",
                    "entity": "mixture",
                    "attribute": "unboiled",
                    "change": "less likely"
                },
                {
                    "type": "openpi_entity",
                    "entity": "cocoa powder",
                    "attribute": "in a mugs",
                    "change": "more likely"
                },
                {
                    "type": "openpi_entity",
                    "entity": "cocoa powder",
                    "attribute": "in a container",
                    "change": "less likely"
                },
                {
                    "type": "openpi_entity",
                    "entity": "vanilla bean",
                    "attribute": "in mug",
                    "change": "more likely"
                },
                {
                    "type": "openpi_entity",
                    "entity": "vanilla bean",
                    "attribute": "whole",
                    "change": "less likely"
                },
                {
                    "type": "openpi_entity",
                    "entity": "vanilla bean",
                    "attribute": "inside mug",
                    "change": "more likely"
                },
                {
                    "type": "openpi_entity",
                    "entity": "vanilla bean",
                    "attribute": "outside of mug",
                    "change": "less likely"
                },
                {
                    "type": "openpi_entity",
                    "entity": "mug",
                    "attribute": "heavier",
                    "change": "more likely"
                },
                {
                    "type": "openpi_entity",
                    "entity": "mug",
                    "attribute": "lighter",
                    "change": "less likely"
                },
                {
                    "type": "openpi_entity",
                    "entity": "vanilla",
                    "attribute": "in a mug",
                    "change": "more likely"
                },
                {
                    "type": "openpi_entity",
                    "entity": "vanilla",
                    "attribute": "in a bottle",
                    "change": "less likely"
                }
            ],
            [
                {
                    "type": "step",
                    "step": "Top the hot cocoa with marshmallows or whipped cream before serving."
                },
                {
                    "type": "openpi_entity",
                    "entity": "mixture",
                    "attribute": "hot",
                    "change": "more likely"
                },
                {
                    "type": "openpi_entity",
                    "entity": "mixture",
                    "attribute": "room temperature",
                    "change": "less likely"
                },
                {
                    "type": "openpi_entity",
                    "entity": "hot cocoa",
                    "attribute": "on the counter top",
                    "change": "more likely"
                },
                {
                    "type": "openpi_entity",
                    "entity": "hot cocoa",
                    "attribute": "in the saucepan",
                    "change": "less likely"
                },
                {
                    "type": "openpi_entity",
                    "entity": "hot cocoa",
                    "attribute": "topped off",
                    "change": "more likely"
                },
                {
                    "type": "openpi_entity",
                    "entity": "hot cocoa",
                    "attribute": "plain",
                    "change": "less likely"
                },
                {
                    "type": "openpi_entity",
                    "entity": "whipped cream",
                    "attribute": "on top of marshmallows",
                    "change": "more likely"
                },
                {
                    "type": "openpi_entity",
                    "entity": "whipped cream",
                    "attribute": "in container",
                    "change": "less likely"
                },
                {
                    "type": "openpi_entity",
                    "entity": "chocolate",
                    "attribute": "on mug",
                    "change": "more likely"
                },
                {
                    "type": "openpi_entity",
                    "entity": "chocolate",
                    "attribute": "off of mug",
                    "change": "less likely"
                },
                {
                    "type": "openpi_entity",
                    "entity": "mixture",
                    "attribute": "topped off",
                    "change": "more likely"
                },
                {
                    "type": "openpi_entity",
                    "entity": "mixture",
                    "attribute": "plain",
                    "change": "less likely"
                }
            ]
        ]
    },
    "18": {
        "goal": "How to Make Hot Cocoa From Chocolate",
        "annotator": "kuan wei",
        "steps": [
            [
                {
                    "step": "Start."
                }
            ],
            [
                {
                    "type": "step",
                    "step": "Chop\u00c2\u00a04 ounces (112 g) of bittersweet or semisweet chocolate."
                },
                {
                    "type": "openpi_entity",
                    "entity": "chocolate",
                    "attribute": "in a bowl",
                    "change": "more likely"
                },
                {
                    "type": "openpi_entity",
                    "entity": "chocolate",
                    "attribute": "in a package",
                    "change": "less likely"
                },
                {
                    "type": "openpi_entity",
                    "entity": "cutting board",
                    "attribute": "partway empty",
                    "change": "more likely"
                },
                {
                    "type": "openpi_entity",
                    "entity": "cutting board",
                    "attribute": "full",
                    "change": "less likely"
                },
                {
                    "type": "openpi_entity",
                    "entity": "bittersweet",
                    "attribute": "in a bowl",
                    "change": "more likely"
                },
                {
                    "type": "openpi_entity",
                    "entity": "bittersweet",
                    "attribute": "in a package",
                    "change": "less likely"
                },
                {
                    "type": "openpi_entity",
                    "entity": "chocolate",
                    "attribute": "flavored",
                    "change": "more likely"
                },
                {
                    "type": "openpi_entity",
                    "entity": "chocolate",
                    "attribute": "plain",
                    "change": "less likely"
                },
                {
                    "type": "openpi_entity",
                    "entity": "bittersweet",
                    "attribute": "in a bowl",
                    "change": "more likely"
                },
                {
                    "type": "openpi_entity",
                    "entity": "bittersweet",
                    "attribute": "in a container",
                    "change": "less likely"
                },
                {
                    "type": "openpi_entity",
                    "entity": "chocolate",
                    "attribute": "in a bowl",
                    "change": "more likely"
                },
                {
                    "type": "openpi_entity",
                    "entity": "chocolate",
                    "attribute": "in a package",
                    "change": "less likely"
                },
                {
                    "type": "openpi_entity",
                    "entity": "bittersweet",
                    "attribute": "cut up",
                    "change": "more likely"
                },
                {
                    "type": "openpi_entity",
                    "entity": "bittersweet",
                    "attribute": "whole",
                    "change": "less likely"
                },
                {
                    "type": "openpi_entity",
                    "entity": "spoon",
                    "attribute": "dirty",
                    "change": "more likely"
                },
                {
                    "type": "openpi_entity",
                    "entity": "spoon",
                    "attribute": "clean",
                    "change": "less likely"
                },
                {
                    "type": "openpi_entity",
                    "entity": "bittersweet",
                    "attribute": "on the counter top",
                    "change": "more likely"
                },
                {
                    "type": "openpi_entity",
                    "entity": "bittersweet",
                    "attribute": "in the pantry",
                    "change": "less likely"
                },
                {
                    "type": "openpi_entity",
                    "entity": "bowl",
                    "attribute": "heavier",
                    "change": "more likely"
                },
                {
                    "type": "openpi_entity",
                    "entity": "bowl",
                    "attribute": "lighter",
                    "change": "less likely"
                }
            ],
            [
                {
                    "type": "step",
                    "step": "Heat the milk and salt to a simmer over medium heat.\u00c2\u00a0"
                },
                {
                    "type": "openpi_entity",
                    "entity": "milk",
                    "attribute": "liquid",
                    "change": "more likely"
                },
                {
                    "type": "openpi_entity",
                    "entity": "milk",
                    "attribute": "solid",
                    "change": "less likely"
                },
                {
                    "type": "openpi_entity",
                    "entity": "salt",
                    "attribute": "in pan",
                    "change": "more likely"
                },
                {
                    "type": "openpi_entity",
                    "entity": "salt",
                    "attribute": "in pantry",
                    "change": "less likely"
                },
                {
                    "type": "openpi_entity",
                    "entity": "milk",
                    "attribute": "in pan",
                    "change": "more likely"
                },
                {
                    "type": "openpi_entity",
                    "entity": "milk",
                    "attribute": "in refrigerator",
                    "change": "less likely"
                }
            ],
            [
                {
                    "type": "step",
                    "step": "Whisk in the chopped chocolate.\u00c2\u00a0"
                },
                {
                    "type": "entity",
                    "entity": "chocolate",
                    "attribute": "solid",
                    "change": "less likely"
                },
                {
                    "type": "multihop",
                    "event": "I cut the chocolate.",
                    "change": "less likely"
                },
                {
                    "type": "openpi_entity",
                    "entity": "chocolate",
                    "attribute": "chopped",
                    "change": "more likely"
                },
                {
                    "type": "openpi_entity",
                    "entity": "chocolate",
                    "attribute": "whole",
                    "change": "less likely"
                },
                {
                    "type": "openpi_entity",
                    "entity": "chocolate",
                    "attribute": "warm",
                    "change": "more likely"
                },
                {
                    "type": "openpi_entity",
                    "entity": "chocolate",
                    "attribute": "cool",
                    "change": "less likely"
                },
                {
                    "type": "openpi_entity",
                    "entity": "chocolate",
                    "attribute": "in blender",
                    "change": "more likely"
                },
                {
                    "type": "openpi_entity",
                    "entity": "chocolate",
                    "attribute": "on counter",
                    "change": "less likely"
                },
                {
                    "type": "openpi_entity",
                    "entity": "chocolate",
                    "attribute": "in the blender",
                    "change": "more likely"
                },
                {
                    "type": "openpi_entity",
                    "entity": "chocolate",
                    "attribute": "in a package",
                    "change": "less likely"
                },
                {
                    "type": "openpi_entity",
                    "entity": "chocolate",
                    "attribute": "melted",
                    "change": "more likely"
                },
                {
                    "type": "openpi_entity",
                    "entity": "chocolate",
                    "attribute": "solid",
                    "change": "less likely"
                },
                {
                    "type": "openpi_entity",
                    "entity": "chocolate",
                    "attribute": "whisked in",
                    "change": "more likely"
                },
                {
                    "type": "openpi_entity",
                    "entity": "chocolate",
                    "attribute": "intact",
                    "change": "less likely"
                },
                {
                    "type": "openpi_entity",
                    "entity": "chocolate",
                    "attribute": "in blender",
                    "change": "more likely"
                },
                {
                    "type": "openpi_entity",
                    "entity": "chocolate",
                    "attribute": "in package",
                    "change": "less likely"
                }
            ],
            [
                {
                    "type": "step",
                    "step": "Turn off the burner and stir in vanilla.\u00c2\u00a0"
                },
                {
                    "type": "openpi_entity",
                    "entity": "chocolate",
                    "attribute": "cooked",
                    "change": "more likely"
                },
                {
                    "type": "openpi_entity",
                    "entity": "chocolate",
                    "attribute": "raw",
                    "change": "less likely"
                },
                {
                    "type": "openpi_entity",
                    "entity": "pot",
                    "attribute": "full",
                    "change": "more likely"
                },
                {
                    "type": "openpi_entity",
                    "entity": "pot",
                    "attribute": "empty",
                    "change": "less likely"
                },
                {
                    "type": "openpi_entity",
                    "entity": "spatula",
                    "attribute": "in pot",
                    "change": "more likely"
                },
                {
                    "type": "openpi_entity",
                    "entity": "spatula",
                    "attribute": "on counter",
                    "change": "less likely"
                },
                {
                    "type": "openpi_entity",
                    "entity": "spatula",
                    "attribute": "in pot",
                    "change": "more likely"
                },
                {
                    "type": "openpi_entity",
                    "entity": "spatula",
                    "attribute": "in drawer",
                    "change": "less likely"
                },
                {
                    "type": "openpi_entity",
                    "entity": "spatula",
                    "attribute": "wet",
                    "change": "more likely"
                },
                {
                    "type": "openpi_entity",
                    "entity": "spatula",
                    "attribute": "dry",
                    "change": "less likely"
                },
                {
                    "type": "openpi_entity",
                    "entity": "mixture",
                    "attribute": "stirred together",
                    "change": "more likely"
                },
                {
                    "type": "openpi_entity",
                    "entity": "mixture",
                    "attribute": "separate",
                    "change": "less likely"
                },
                {
                    "type": "openpi_entity",
                    "entity": "vanilla",
                    "attribute": "warm",
                    "change": "more likely"
                },
                {
                    "type": "openpi_entity",
                    "entity": "vanilla",
                    "attribute": "cold",
                    "change": "less likely"
                },
                {
                    "type": "openpi_entity",
                    "entity": "vanilla",
                    "attribute": "in the pot",
                    "change": "more likely"
                },
                {
                    "type": "openpi_entity",
                    "entity": "vanilla",
                    "attribute": "in the bottle",
                    "change": "less likely"
                },
                {
                    "type": "openpi_entity",
                    "entity": "stove burner",
                    "attribute": "hot",
                    "change": "more likely"
                },
                {
                    "type": "openpi_entity",
                    "entity": "stove burner",
                    "attribute": "cool",
                    "change": "less likely"
                }
            ],
            [
                {
                    "type": "step",
                    "step": "Pour the hot chocolate into mugs and serve them with\u00c2\u00a0whipped cream.\u00c2\u00a0"
                },
                {
                    "type": "openpi_entity",
                    "entity": "chocolate",
                    "attribute": "in mugs",
                    "change": "more likely"
                },
                {
                    "type": "openpi_entity",
                    "entity": "chocolate",
                    "attribute": "in pan",
                    "change": "less likely"
                },
                {
                    "type": "openpi_entity",
                    "entity": "chocolate",
                    "attribute": "warm",
                    "change": "more likely"
                },
                {
                    "type": "openpi_entity",
                    "entity": "chocolate",
                    "attribute": "cool",
                    "change": "less likely"
                },
                {
                    "type": "openpi_entity",
                    "entity": "chocolate",
                    "attribute": "in a mugs",
                    "change": "more likely"
                },
                {
                    "type": "openpi_entity",
                    "entity": "chocolate",
                    "attribute": "in a pot",
                    "change": "less likely"
                },
                {
                    "type": "openpi_entity",
                    "entity": "mixture",
                    "attribute": "in mugs",
                    "change": "more likely"
                },
                {
                    "type": "openpi_entity",
                    "entity": "mixture",
                    "attribute": "in pot",
                    "change": "less likely"
                },
                {
                    "type": "openpi_entity",
                    "entity": "chocolate",
                    "attribute": "in mugs",
                    "change": "more likely"
                },
                {
                    "type": "openpi_entity",
                    "entity": "chocolate",
                    "attribute": "in pot",
                    "change": "less likely"
                },
                {
                    "type": "openpi_entity",
                    "entity": "chocolate",
                    "attribute": "hot",
                    "change": "more likely"
                },
                {
                    "type": "openpi_entity",
                    "entity": "chocolate",
                    "attribute": "cold",
                    "change": "less likely"
                }
            ]
        ]
    },
    "19": {
        "goal": "Single-Serving Microwave Cocoa",
        "annotator": "kuan wei",
        "steps": [
            [
                {
                    "step": "Start."
                }
            ],
            [
                {
                    "type": "step",
                    "step": "Mix the cocoa, sugar, and salt together in a mug."
                },
                {
                    "type": "openpi_entity",
                    "entity": "mixture",
                    "attribute": "in mug",
                    "change": "more likely"
                },
                {
                    "type": "openpi_entity",
                    "entity": "mixture",
                    "attribute": "on counter",
                    "change": "less likely"
                },
                {
                    "type": "openpi_entity",
                    "entity": "sugar",
                    "attribute": "in the mug",
                    "change": "more likely"
                },
                {
                    "type": "openpi_entity",
                    "entity": "sugar",
                    "attribute": "in a package",
                    "change": "less likely"
                },
                {
                    "type": "openpi_entity",
                    "entity": "mixture",
                    "attribute": "sweet smelling",
                    "change": "more likely"
                },
                {
                    "type": "openpi_entity",
                    "entity": "mixture",
                    "attribute": "odorless",
                    "change": "less likely"
                },
                {
                    "type": "openpi_entity",
                    "entity": "cocoa powder",
                    "attribute": "in the mug",
                    "change": "more likely"
                },
                {
                    "type": "openpi_entity",
                    "entity": "cocoa powder",
                    "attribute": "in a container",
                    "change": "less likely"
                },
                {
                    "type": "openpi_entity",
                    "entity": "salt",
                    "attribute": "in the mug",
                    "change": "more likely"
                },
                {
                    "type": "openpi_entity",
                    "entity": "salt",
                    "attribute": "in a container",
                    "change": "less likely"
                },
                {
                    "type": "openpi_entity",
                    "entity": "mug",
                    "attribute": "wet",
                    "change": "more likely"
                },
                {
                    "type": "openpi_entity",
                    "entity": "mug",
                    "attribute": "dry",
                    "change": "less likely"
                },
                {
                    "type": "openpi_entity",
                    "entity": "salt",
                    "attribute": "dissolved",
                    "change": "more likely"
                },
                {
                    "type": "openpi_entity",
                    "entity": "salt",
                    "attribute": "in granules",
                    "change": "less likely"
                },
                {
                    "type": "openpi_entity",
                    "entity": "mug",
                    "attribute": "full of ingredients",
                    "change": "more likely"
                },
                {
                    "type": "openpi_entity",
                    "entity": "mug",
                    "attribute": "empty",
                    "change": "less likely"
                },
                {
                    "type": "openpi_entity",
                    "entity": "mug",
                    "attribute": "dirty",
                    "change": "more likely"
                },
                {
                    "type": "openpi_entity",
                    "entity": "mug",
                    "attribute": "clean",
                    "change": "less likely"
                }
            ],
            [
                {
                    "type": "step",
                    "step": "Stir in 1 cup (240\u00c2\u00a0ml) of milk."
                },
                {
                    "type": "entity",
                    "entity": "sugar",
                    "attribute": "in powder form",
                    "change": "less likely"
                },
                {
                    "type": "openpi_entity",
                    "entity": "milk",
                    "attribute": "mixed with cocoa powder",
                    "change": "more likely"
                },
                {
                    "type": "openpi_entity",
                    "entity": "milk",
                    "attribute": "separate from cocoa powder",
                    "change": "less likely"
                },
                {
                    "type": "openpi_entity",
                    "entity": "bowl",
                    "attribute": "fuller",
                    "change": "more likely"
                },
                {
                    "type": "openpi_entity",
                    "entity": "bowl",
                    "attribute": "empty",
                    "change": "less likely"
                },
                {
                    "type": "openpi_entity",
                    "entity": "milk",
                    "attribute": "in the mug",
                    "change": "more likely"
                },
                {
                    "type": "openpi_entity",
                    "entity": "milk",
                    "attribute": "in the fridge",
                    "change": "less likely"
                },
                {
                    "type": "openpi_entity",
                    "entity": "mug",
                    "attribute": "wet",
                    "change": "more likely"
                },
                {
                    "type": "openpi_entity",
                    "entity": "mug",
                    "attribute": "dry",
                    "change": "less likely"
                },
                {
                    "type": "openpi_entity",
                    "entity": "milk",
                    "attribute": "in the bowl",
                    "change": "more likely"
                },
                {
                    "type": "openpi_entity",
                    "entity": "milk",
                    "attribute": "in the carton",
                    "change": "less likely"
                }
            ],
            [
                {
                    "type": "step",
                    "step": "Microwave the mixture for 1 minute."
                },
                {
                    "type": "openpi_entity",
                    "entity": "mixer",
                    "attribute": "on",
                    "change": "more likely"
                },
                {
                    "type": "openpi_entity",
                    "entity": "mixer",
                    "attribute": "off",
                    "change": "less likely"
                },
                {
                    "type": "openpi_entity",
                    "entity": "mixer",
                    "attribute": "turned on",
                    "change": "more likely"
                },
                {
                    "type": "openpi_entity",
                    "entity": "mixer",
                    "attribute": "turned off",
                    "change": "less likely"
                },
                {
                    "type": "openpi_entity",
                    "entity": "m mug",
                    "attribute": "wet",
                    "change": "more likely"
                },
                {
                    "type": "openpi_entity",
                    "entity": "m mug",
                    "attribute": "dry",
                    "change": "less likely"
                },
                {
                    "type": "openpi_entity",
                    "entity": "mixture",
                    "attribute": "smoother",
                    "change": "more likely"
                },
                {
                    "type": "openpi_entity",
                    "entity": "mixture",
                    "attribute": "lumpy",
                    "change": "less likely"
                },
                {
                    "type": "openpi_entity",
                    "entity": "mixer",
                    "attribute": "cold",
                    "change": "more likely"
                },
                {
                    "type": "openpi_entity",
                    "entity": "mixer",
                    "attribute": "room temperature",
                    "change": "less likely"
                },
                {
                    "type": "openpi_entity",
                    "entity": "mixture",
                    "attribute": "moving",
                    "change": "more likely"
                },
                {
                    "type": "openpi_entity",
                    "entity": "mixture",
                    "attribute": "still",
                    "change": "less likely"
                },
                {
                    "type": "openpi_entity",
                    "entity": "mixture",
                    "attribute": "mixed",
                    "change": "more likely"
                },
                {
                    "type": "openpi_entity",
                    "entity": "mixture",
                    "attribute": "unmixed",
                    "change": "less likely"
                },
                {
                    "type": "openpi_entity",
                    "entity": "mixer",
                    "attribute": "on",
                    "change": "more likely"
                },
                {
                    "type": "openpi_entity",
                    "entity": "mixer",
                    "attribute": "off",
                    "change": "less likely"
                },
                {
                    "type": "openpi_entity",
                    "entity": "whisk",
                    "attribute": "wet",
                    "change": "more likely"
                },
                {
                    "type": "openpi_entity",
                    "entity": "whisk",
                    "attribute": "dry",
                    "change": "less likely"
                },
                {
                    "type": "openpi_entity",
                    "entity": "whisk",
                    "attribute": "dirty",
                    "change": "more likely"
                },
                {
                    "type": "openpi_entity",
                    "entity": "whisk",
                    "attribute": "clean",
                    "change": "less likely"
                }
            ],
            [
                {
                    "type": "step",
                    "step": "Stir vanilla into the cocoa before drinking it.\u00c2\u00a0"
                },
                {
                    "type": "multihop",
                    "event": "I drink the sugar.",
                    "change": "more likely"
                },
                {
                    "type": "openpi_entity",
                    "entity": "mixture",
                    "attribute": "more combined",
                    "change": "more likely"
                },
                {
                    "type": "openpi_entity",
                    "entity": "mixture",
                    "attribute": "less combined",
                    "change": "less likely"
                },
                {
                    "type": "openpi_entity",
                    "entity": "mixing cup",
                    "attribute": "fuller",
                    "change": "more likely"
                },
                {
                    "type": "openpi_entity",
                    "entity": "mixing cup",
                    "attribute": "emptier",
                    "change": "less likely"
                },
                {
                    "type": "openpi_entity",
                    "entity": "mixture",
                    "attribute": "drinkable",
                    "change": "more likely"
                },
                {
                    "type": "openpi_entity",
                    "entity": "mixture",
                    "attribute": "powdered",
                    "change": "less likely"
                },
                {
                    "type": "openpi_entity",
                    "entity": "vanilla bean",
                    "attribute": "inside mug",
                    "change": "more likely"
                },
                {
                    "type": "openpi_entity",
                    "entity": "vanilla bean",
                    "attribute": "outside of mug",
                    "change": "less likely"
                },
                {
                    "type": "openpi_entity",
                    "entity": "vanilla bean",
                    "attribute": "wet",
                    "change": "more likely"
                },
                {
                    "type": "openpi_entity",
                    "entity": "vanilla bean",
                    "attribute": "dry",
                    "change": "less likely"
                },
                {
                    "type": "openpi_entity",
                    "entity": "vanilla",
                    "attribute": "in the mug",
                    "change": "more likely"
                },
                {
                    "type": "openpi_entity",
                    "entity": "vanilla",
                    "attribute": "in the pantry",
                    "change": "less likely"
                },
                {
                    "type": "openpi_entity",
                    "entity": "mug",
                    "attribute": "wet",
                    "change": "more likely"
                },
                {
                    "type": "openpi_entity",
                    "entity": "mug",
                    "attribute": "dry",
                    "change": "less likely"
                },
                {
                    "type": "openpi_entity",
                    "entity": "cocoa",
                    "attribute": "inside mug",
                    "change": "more likely"
                },
                {
                    "type": "openpi_entity",
                    "entity": "cocoa",
                    "attribute": "outside of mug",
                    "change": "less likely"
                },
                {
                    "type": "openpi_entity",
                    "entity": "vanilla bean",
                    "attribute": "mixed with cocoa",
                    "change": "more likely"
                },
                {
                    "type": "openpi_entity",
                    "entity": "vanilla bean",
                    "attribute": "separate from cocoa",
                    "change": "less likely"
                },
                {
                    "type": "openpi_entity",
                    "entity": "vanilla",
                    "attribute": "inside mug",
                    "change": "more likely"
                },
                {
                    "type": "openpi_entity",
                    "entity": "vanilla",
                    "attribute": "outside of mug",
                    "change": "less likely"
                }
            ]
        ]
    },
    "20": {
        "goal": "Make Cold Chocolate Drink",
        "annotator": "kuan wei",
        "steps": [
            [
                {
                    "step": "Start."
                }
            ],
            [
                {
                    "type": "step",
                    "step": "Start with a mug of milk or water."
                },
                {
                    "type": "openpi_entity",
                    "entity": "mug",
                    "attribute": "on the counter",
                    "change": "more likely"
                },
                {
                    "type": "openpi_entity",
                    "entity": "mug",
                    "attribute": "in the cupboard",
                    "change": "less likely"
                },
                {
                    "type": "openpi_entity",
                    "entity": "mug",
                    "attribute": "full",
                    "change": "more likely"
                },
                {
                    "type": "openpi_entity",
                    "entity": "mug",
                    "attribute": "empty",
                    "change": "less likely"
                },
                {
                    "type": "openpi_entity",
                    "entity": "milk",
                    "attribute": "in the mug",
                    "change": "more likely"
                },
                {
                    "type": "openpi_entity",
                    "entity": "milk",
                    "attribute": "in the carton",
                    "change": "less likely"
                },
                {
                    "type": "openpi_entity",
                    "entity": "mug",
                    "attribute": "on counter",
                    "change": "more likely"
                },
                {
                    "type": "openpi_entity",
                    "entity": "mug",
                    "attribute": "in cupboard",
                    "change": "less likely"
                },
                {
                    "type": "openpi_entity",
                    "entity": "mug",
                    "attribute": "contains food",
                    "change": "more likely"
                },
                {
                    "type": "openpi_entity",
                    "entity": "mug",
                    "attribute": "empty",
                    "change": "less likely"
                },
                {
                    "type": "openpi_entity",
                    "entity": "mug",
                    "attribute": "full",
                    "change": "more likely"
                },
                {
                    "type": "openpi_entity",
                    "entity": "mug",
                    "attribute": "empty",
                    "change": "less likely"
                },
                {
                    "type": "openpi_entity",
                    "entity": "mug",
                    "attribute": "wet",
                    "change": "more likely"
                },
                {
                    "type": "openpi_entity",
                    "entity": "mug",
                    "attribute": "dry",
                    "change": "less likely"
                },
                {
                    "type": "openpi_entity",
                    "entity": "mug",
                    "attribute": "covered in milk",
                    "change": "more likely"
                },
                {
                    "type": "openpi_entity",
                    "entity": "mug",
                    "attribute": "empty",
                    "change": "less likely"
                },
                {
                    "type": "openpi_entity",
                    "entity": "milk",
                    "attribute": "in mug",
                    "change": "more likely"
                },
                {
                    "type": "openpi_entity",
                    "entity": "milk",
                    "attribute": "in carton",
                    "change": "less likely"
                },
                {
                    "type": "openpi_entity",
                    "entity": "mug",
                    "attribute": "wet",
                    "change": "more likely"
                },
                {
                    "type": "openpi_entity",
                    "entity": "mug",
                    "attribute": "dry",
                    "change": "less likely"
                },
                {
                    "type": "openpi_entity",
                    "entity": "mug",
                    "attribute": "heavier",
                    "change": "more likely"
                },
                {
                    "type": "openpi_entity",
                    "entity": "mug",
                    "attribute": "lighter",
                    "change": "less likely"
                },
                {
                    "type": "openpi_entity",
                    "entity": "milk",
                    "attribute": "in the mug",
                    "change": "more likely"
                },
                {
                    "type": "openpi_entity",
                    "entity": "milk",
                    "attribute": "in a container",
                    "change": "less likely"
                }
            ],
            [
                {
                    "type": "step",
                    "step": "Mix in cocoa powder and sugar to taste.\u00c2\u00a0"
                },
                {
                    "type": "openpi_entity",
                    "entity": "mixture",
                    "attribute": "sticky",
                    "change": "more likely"
                },
                {
                    "type": "openpi_entity",
                    "entity": "mixture",
                    "attribute": "smooth",
                    "change": "less likely"
                },
                {
                    "type": "openpi_entity",
                    "entity": "cocoa powder",
                    "attribute": "in a mug",
                    "change": "more likely"
                },
                {
                    "type": "openpi_entity",
                    "entity": "cocoa powder",
                    "attribute": "in a package",
                    "change": "less likely"
                },
                {
                    "type": "openpi_entity",
                    "entity": "mixture",
                    "attribute": "gritty",
                    "change": "more likely"
                },
                {
                    "type": "openpi_entity",
                    "entity": "mixture",
                    "attribute": "smooth",
                    "change": "less likely"
                },
                {
                    "type": "openpi_entity",
                    "entity": "sugar",
                    "attribute": "in mug",
                    "change": "more likely"
                },
                {
                    "type": "openpi_entity",
                    "entity": "sugar",
                    "attribute": "in package",
                    "change": "less likely"
                },
                {
                    "type": "openpi_entity",
                    "entity": "sugar",
                    "attribute": "in a mug",
                    "change": "more likely"
                },
                {
                    "type": "openpi_entity",
                    "entity": "sugar",
                    "attribute": "in a container",
                    "change": "less likely"
                },
                {
                    "type": "openpi_entity",
                    "entity": "mug",
                    "attribute": "sweet smelling",
                    "change": "more likely"
                },
                {
                    "type": "openpi_entity",
                    "entity": "mug",
                    "attribute": "normal smelling",
                    "change": "less likely"
                },
                {
                    "type": "openpi_entity",
                    "entity": "mug",
                    "attribute": "sweet smelling",
                    "change": "more likely"
                },
                {
                    "type": "openpi_entity",
                    "entity": "mug",
                    "attribute": "plain smelling",
                    "change": "less likely"
                }
            ],
            [
                {
                    "type": "step",
                    "step": "Microwave for 30\u00e2\u20ac\u201c45 seconds.\u00c2\u00a0"
                },
                {
                    "type": "entity",
                    "entity": "the milk",
                    "attribute": "cold",
                    "change": "less likely"
                },
                {
                    "type": "multihop",
                    "event": "I drink the milk.",
                    "change": "less likely"
                },
                {
                    "type": "openpi_entity",
                    "entity": "milk",
                    "attribute": "hot",
                    "change": "more likely"
                },
                {
                    "type": "openpi_entity",
                    "entity": "milk",
                    "attribute": "cold",
                    "change": "less likely"
                },
                {
                    "type": "openpi_entity",
                    "entity": "microwave",
                    "attribute": "turned on",
                    "change": "more likely"
                },
                {
                    "type": "openpi_entity",
                    "entity": "microwave",
                    "attribute": "turned off",
                    "change": "less likely"
                },
                {
                    "type": "openpi_entity",
                    "entity": "mixture",
                    "attribute": "foamy",
                    "change": "more likely"
                },
                {
                    "type": "openpi_entity",
                    "entity": "mixture",
                    "attribute": "smoother",
                    "change": "less likely"
                },
                {
                    "type": "openpi_entity",
                    "entity": "mixture",
                    "attribute": "dissolved",
                    "change": "more likely"
                },
                {
                    "type": "openpi_entity",
                    "entity": "mixture",
                    "attribute": "powdered",
                    "change": "less likely"
                },
                {
                    "type": "openpi_entity",
                    "entity": "microwave",
                    "attribute": "on",
                    "change": "more likely"
                },
                {
                    "type": "openpi_entity",
                    "entity": "microwave",
                    "attribute": "off",
                    "change": "less likely"
                },
                {
                    "type": "openpi_entity",
                    "entity": "kitchen",
                    "attribute": "loud",
                    "change": "more likely"
                },
                {
                    "type": "openpi_entity",
                    "entity": "kitchen",
                    "attribute": "quiet",
                    "change": "less likely"
                },
                {
                    "type": "openpi_entity",
                    "entity": "mug",
                    "attribute": "wet",
                    "change": "more likely"
                },
                {
                    "type": "openpi_entity",
                    "entity": "mug",
                    "attribute": "dry",
                    "change": "less likely"
                },
                {
                    "type": "openpi_entity",
                    "entity": "mug",
                    "attribute": "cold",
                    "change": "more likely"
                },
                {
                    "type": "openpi_entity",
                    "entity": "mug",
                    "attribute": "room temperature",
                    "change": "less likely"
                },
                {
                    "type": "openpi_entity",
                    "entity": "mac",
                    "attribute": "liquid",
                    "change": "more likely"
                },
                {
                    "type": "openpi_entity",
                    "entity": "mac",
                    "attribute": "solid",
                    "change": "less likely"
                }
            ],
            [
                {
                    "type": "step",
                    "step": "Chill for 30\u00e2\u20ac\u201c60 minutes.\u00c2\u00a0"
                },
                {
                    "type": "entity",
                    "entity": "the milk",
                    "attribute": "cold",
                    "change": "more likely"
                },
                {
                    "type": "multihop",
                    "event": "I drink the milk.",
                    "change": "more likely"
                },
                {
                    "type": "openpi_entity",
                    "entity": "microwave",
                    "attribute": "turned on",
                    "change": "more likely"
                },
                {
                    "type": "openpi_entity",
                    "entity": "microwave",
                    "attribute": "turned off",
                    "change": "less likely"
                },
                {
                    "type": "openpi_entity",
                    "entity": "microwave",
                    "attribute": "on",
                    "change": "more likely"
                },
                {
                    "type": "openpi_entity",
                    "entity": "microwave",
                    "attribute": "off",
                    "change": "less likely"
                },
                {
                    "type": "openpi_entity",
                    "entity": "mix",
                    "attribute": "solid",
                    "change": "more likely"
                },
                {
                    "type": "openpi_entity",
                    "entity": "mix",
                    "attribute": "liquid",
                    "change": "less likely"
                },
                {
                    "type": "openpi_entity",
                    "entity": "chocolate",
                    "attribute": "melted",
                    "change": "more likely"
                },
                {
                    "type": "openpi_entity",
                    "entity": "chocolate",
                    "attribute": "solid",
                    "change": "less likely"
                },
                {
                    "type": "openpi_entity",
                    "entity": "mix",
                    "attribute": "cold",
                    "change": "more likely"
                },
                {
                    "type": "openpi_entity",
                    "entity": "mix",
                    "attribute": "room temperature",
                    "change": "less likely"
                },
                {
                    "type": "openpi_entity",
                    "entity": "ice",
                    "attribute": "cool",
                    "change": "more likely"
                },
                {
                    "type": "openpi_entity",
                    "entity": "ice",
                    "attribute": "cold",
                    "change": "less likely"
                },
                {
                    "type": "openpi_entity",
                    "entity": "mug",
                    "attribute": "cold",
                    "change": "more likely"
                },
                {
                    "type": "openpi_entity",
                    "entity": "mug",
                    "attribute": "room temperature",
                    "change": "less likely"
                }
            ],
            [
                {
                    "type": "step",
                    "step": "Add ice."
                },
                {
                    "type": "openpi_entity",
                    "entity": "mixture",
                    "attribute": "warmer",
                    "change": "more likely"
                },
                {
                    "type": "openpi_entity",
                    "entity": "mixture",
                    "attribute": "cold",
                    "change": "less likely"
                },
                {
                    "type": "openpi_entity",
                    "entity": "cocoa powder and sugar",
                    "attribute": "mixed",
                    "change": "more likely"
                },
                {
                    "type": "openpi_entity",
                    "entity": "cocoa powder and sugar",
                    "attribute": "separate",
                    "change": "less likely"
                },
                {
                    "type": "openpi_entity",
                    "entity": "mug",
                    "attribute": "warm",
                    "change": "more likely"
                },
                {
                    "type": "openpi_entity",
                    "entity": "mug",
                    "attribute": "cool",
                    "change": "less likely"
                },
                {
                    "type": "openpi_entity",
                    "entity": "ice",
                    "attribute": "in mixture",
                    "change": "more likely"
                },
                {
                    "type": "openpi_entity",
                    "entity": "ice",
                    "attribute": "in freezer",
                    "change": "less likely"
                },
                {
                    "type": "openpi_entity",
                    "entity": "ice",
                    "attribute": "in the mug",
                    "change": "more likely"
                },
                {
                    "type": "openpi_entity",
                    "entity": "ice",
                    "attribute": "in a container",
                    "change": "less likely"
                },
                {
                    "type": "openpi_entity",
                    "entity": "mixture",
                    "attribute": "cold",
                    "change": "more likely"
                },
                {
                    "type": "openpi_entity",
                    "entity": "mixture",
                    "attribute": "room temperature",
                    "change": "less likely"
                },
                {
                    "type": "openpi_entity",
                    "entity": "mug",
                    "attribute": "colder",
                    "change": "more likely"
                },
                {
                    "type": "openpi_entity",
                    "entity": "mug",
                    "attribute": "room temperature",
                    "change": "less likely"
                },
                {
                    "type": "openpi_entity",
                    "entity": "mixture",
                    "attribute": "cold",
                    "change": "more likely"
                },
                {
                    "type": "openpi_entity",
                    "entity": "mixture",
                    "attribute": "room temperature",
                    "change": "less likely"
                },
                {
                    "type": "openpi_entity",
                    "entity": "mixture",
                    "attribute": "warmer",
                    "change": "more likely"
                },
                {
                    "type": "openpi_entity",
                    "entity": "mixture",
                    "attribute": "cool",
                    "change": "less likely"
                }
            ]
        ]
    },
    "21": {
        "goal": "\ufeffHow to Make Pancakes",
        "annotator": "Pujun Guan",
        "steps": [
            [
                {
                    "step": "Start."
                }
            ],
            [
                {
                    "type": "step",
                    "step": "Crack the eggs into a bowl and beat until creamy. "
                },
                {
                    "type": "openpi_entity",
                    "entity": "bowl",
                    "attribute": "full",
                    "change": "more likely"
                },
                {
                    "type": "openpi_entity",
                    "entity": "bowl",
                    "attribute": "empty",
                    "change": "less likely"
                },
                {
                    "type": "openpi_entity",
                    "entity": "mixture",
                    "attribute": "smooth",
                    "change": "more likely"
                },
                {
                    "type": "openpi_entity",
                    "entity": "mixture",
                    "attribute": "lumpy",
                    "change": "less likely"
                },
                {
                    "type": "openpi_entity",
                    "entity": "bowl",
                    "attribute": "wet",
                    "change": "more likely"
                },
                {
                    "type": "openpi_entity",
                    "entity": "bowl",
                    "attribute": "dry",
                    "change": "less likely"
                },
                {
                    "type": "openpi_entity",
                    "entity": "eggshell",
                    "attribute": "in bowl",
                    "change": "more likely"
                },
                {
                    "type": "openpi_entity",
                    "entity": "eggshell",
                    "attribute": "on counter",
                    "change": "less likely"
                },
                {
                    "type": "openpi_entity",
                    "entity": "mixing bowl",
                    "attribute": "full",
                    "change": "more likely"
                },
                {
                    "type": "openpi_entity",
                    "entity": "mixing bowl",
                    "attribute": "clean",
                    "change": "less likely"
                },
                {
                    "type": "openpi_entity",
                    "entity": "spoon",
                    "attribute": "dirty",
                    "change": "more likely"
                },
                {
                    "type": "openpi_entity",
                    "entity": "spoon",
                    "attribute": "clean",
                    "change": "less likely"
                },
                {
                    "type": "openpi_entity",
                    "entity": "bowl",
                    "attribute": "dirty",
                    "change": "more likely"
                },
                {
                    "type": "openpi_entity",
                    "entity": "bowl",
                    "attribute": "clean",
                    "change": "less likely"
                }
            ],
            [
                {
                    "type": "step",
                    "step": "Melt\u00a0the butter in a microwave-safe bowl."
                },
                {
                    "type": "entity",
                    "entity": "the butter",
                    "attribute": "liquid",
                    "change": "more likely"
                },
                {
                    "type": "openpi_entity",
                    "entity": "bowl",
                    "attribute": "filled with butter",
                    "change": "more likely"
                },
                {
                    "type": "openpi_entity",
                    "entity": "bowl",
                    "attribute": "empty",
                    "change": "less likely"
                },
                {
                    "type": "openpi_entity",
                    "entity": "butter",
                    "attribute": "liquid",
                    "change": "more likely"
                },
                {
                    "type": "openpi_entity",
                    "entity": "butter",
                    "attribute": "solid",
                    "change": "less likely"
                },
                {
                    "type": "openpi_entity",
                    "entity": "bowl",
                    "attribute": "hot",
                    "change": "more likely"
                },
                {
                    "type": "openpi_entity",
                    "entity": "bowl",
                    "attribute": "cool",
                    "change": "less likely"
                },
                {
                    "type": "openpi_entity",
                    "entity": "bowl",
                    "attribute": "full",
                    "change": "more likely"
                },
                {
                    "type": "openpi_entity",
                    "entity": "bowl",
                    "attribute": "empty",
                    "change": "less likely"
                },
                {
                    "type": "openpi_entity",
                    "entity": "microwave",
                    "attribute": "hot",
                    "change": "more likely"
                },
                {
                    "type": "openpi_entity",
                    "entity": "microwave",
                    "attribute": "cold",
                    "change": "less likely"
                },
                {
                    "type": "openpi_entity",
                    "entity": "microwave",
                    "attribute": "hot",
                    "change": "more likely"
                },
                {
                    "type": "openpi_entity",
                    "entity": "microwave",
                    "attribute": "room temperature",
                    "change": "less likely"
                },
                {
                    "type": "openpi_entity",
                    "entity": "microwave",
                    "attribute": "heavier",
                    "change": "more likely"
                },
                {
                    "type": "openpi_entity",
                    "entity": "microwave",
                    "attribute": "lighter",
                    "change": "less likely"
                },
                {
                    "type": "openpi_entity",
                    "entity": "microwave",
                    "attribute": "on",
                    "change": "more likely"
                },
                {
                    "type": "openpi_entity",
                    "entity": "microwave",
                    "attribute": "off",
                    "change": "less likely"
                },
                {
                    "type": "openpi_entity",
                    "entity": "butter",
                    "attribute": "in bowl",
                    "change": "more likely"
                },
                {
                    "type": "openpi_entity",
                    "entity": "butter",
                    "attribute": "in fridge",
                    "change": "less likely"
                },
                {
                    "type": "openpi_entity",
                    "entity": "butter",
                    "attribute": "hot",
                    "change": "more likely"
                },
                {
                    "type": "openpi_entity",
                    "entity": "butter",
                    "attribute": "cold",
                    "change": "less likely"
                },
                {
                    "type": "openpi_entity",
                    "entity": "microwave",
                    "attribute": "dirty",
                    "change": "more likely"
                },
                {
                    "type": "openpi_entity",
                    "entity": "microwave",
                    "attribute": "clean",
                    "change": "less likely"
                },
                {
                    "type": "openpi_entity",
                    "entity": "bowl",
                    "attribute": "dirty",
                    "change": "more likely"
                },
                {
                    "type": "openpi_entity",
                    "entity": "bowl",
                    "attribute": "clean",
                    "change": "less likely"
                }
            ],
            [
                {
                    "type": "step",
                    "step": "Add the butter and milk to the mix."
                },
                {
                    "type": "openpi_entity",
                    "entity": "bowl",
                    "attribute": "full",
                    "change": "more likely"
                },
                {
                    "type": "openpi_entity",
                    "entity": "bowl",
                    "attribute": "empty",
                    "change": "less likely"
                },
                {
                    "type": "openpi_entity",
                    "entity": "butter",
                    "attribute": "liquid",
                    "change": "more likely"
                },
                {
                    "type": "openpi_entity",
                    "entity": "butter",
                    "attribute": "solid",
                    "change": "less likely"
                },
                {
                    "type": "openpi_entity",
                    "entity": "butter",
                    "attribute": "melted",
                    "change": "more likely"
                },
                {
                    "type": "openpi_entity",
                    "entity": "butter",
                    "attribute": "whole",
                    "change": "less likely"
                },
                {
                    "type": "openpi_entity",
                    "entity": "milk",
                    "attribute": "in the bowl",
                    "change": "more likely"
                },
                {
                    "type": "openpi_entity",
                    "entity": "milk",
                    "attribute": "in the fridge",
                    "change": "less likely"
                },
                {
                    "type": "openpi_entity",
                    "entity": "milk",
                    "attribute": "foamy",
                    "change": "more likely"
                },
                {
                    "type": "openpi_entity",
                    "entity": "milk",
                    "attribute": "dry",
                    "change": "less likely"
                },
                {
                    "type": "openpi_entity",
                    "entity": "butter",
                    "attribute": "in the bowl",
                    "change": "more likely"
                },
                {
                    "type": "openpi_entity",
                    "entity": "butter",
                    "attribute": "in the fridge",
                    "change": "less likely"
                },
                {
                    "type": "openpi_entity",
                    "entity": "butter",
                    "attribute": "in bowl",
                    "change": "more likely"
                },
                {
                    "type": "openpi_entity",
                    "entity": "butter",
                    "attribute": "in refrigerator",
                    "change": "less likely"
                },
                {
                    "type": "openpi_entity",
                    "entity": "spoon",
                    "attribute": "dirty",
                    "change": "more likely"
                },
                {
                    "type": "openpi_entity",
                    "entity": "spoon",
                    "attribute": "clean",
                    "change": "less likely"
                },
                {
                    "type": "openpi_entity",
                    "entity": "bowl",
                    "attribute": "full",
                    "change": "more likely"
                },
                {
                    "type": "openpi_entity",
                    "entity": "bowl",
                    "attribute": "empty",
                    "change": "less likely"
                },
                {
                    "type": "openpi_entity",
                    "entity": "bowl",
                    "attribute": "heavier",
                    "change": "more likely"
                },
                {
                    "type": "openpi_entity",
                    "entity": "bowl",
                    "attribute": "lighter",
                    "change": "less likely"
                }
            ],
            [
                {
                    "type": "step",
                    "step": "Heat the frying pan to a medium-low flame. "
                },
                {
                    "type": "openpi_entity",
                    "entity": "butter",
                    "attribute": "liquid",
                    "change": "more likely"
                },
                {
                    "type": "openpi_entity",
                    "entity": "butter",
                    "attribute": "solid",
                    "change": "less likely"
                },
                {
                    "type": "openpi_entity",
                    "entity": "pan",
                    "attribute": "hot",
                    "change": "more likely"
                },
                {
                    "type": "openpi_entity",
                    "entity": "pan",
                    "attribute": "cool",
                    "change": "less likely"
                },
                {
                    "type": "openpi_entity",
                    "entity": "pan",
                    "attribute": "on",
                    "change": "more likely"
                },
                {
                    "type": "openpi_entity",
                    "entity": "pan",
                    "attribute": "off",
                    "change": "less likely"
                },
                {
                    "type": "openpi_entity",
                    "entity": "pan",
                    "attribute": "in the off position",
                    "change": "more likely"
                },
                {
                    "type": "openpi_entity",
                    "entity": "pan",
                    "attribute": "on stove",
                    "change": "less likely"
                },
                {
                    "type": "openpi_entity",
                    "entity": "frying pan",
                    "attribute": "hot",
                    "change": "more likely"
                },
                {
                    "type": "openpi_entity",
                    "entity": "frying pan",
                    "attribute": "cool",
                    "change": "less likely"
                },
                {
                    "type": "openpi_entity",
                    "entity": "stove",
                    "attribute": "on",
                    "change": "more likely"
                },
                {
                    "type": "openpi_entity",
                    "entity": "stove",
                    "attribute": "off",
                    "change": "less likely"
                },
                {
                    "type": "openpi_entity",
                    "entity": "stove",
                    "attribute": "off",
                    "change": "more likely"
                },
                {
                    "type": "openpi_entity",
                    "entity": "stove",
                    "attribute": "on",
                    "change": "less likely"
                },
                {
                    "type": "openpi_entity",
                    "entity": "frying pan",
                    "attribute": "hot",
                    "change": "more likely"
                },
                {
                    "type": "openpi_entity",
                    "entity": "frying pan",
                    "attribute": "cold",
                    "change": "less likely"
                },
                {
                    "type": "openpi_entity",
                    "entity": "stove top",
                    "attribute": "hot",
                    "change": "more likely"
                },
                {
                    "type": "openpi_entity",
                    "entity": "stove top",
                    "attribute": "cold",
                    "change": "less likely"
                },
                {
                    "type": "openpi_entity",
                    "entity": "butter",
                    "attribute": "melted",
                    "change": "more likely"
                },
                {
                    "type": "openpi_entity",
                    "entity": "butter",
                    "attribute": "solid",
                    "change": "less likely"
                },
                {
                    "type": "openpi_entity",
                    "entity": "oil",
                    "attribute": "hot",
                    "change": "more likely"
                },
                {
                    "type": "openpi_entity",
                    "entity": "oil",
                    "attribute": "cool",
                    "change": "less likely"
                }
            ],
            [
                {
                    "type": "step",
                    "step": "Pour butter from the tip of a large spoon or from a pitcher onto the hot griddle or greased frying pan."
                },
                {
                    "type": "openpi_entity",
                    "entity": "butter",
                    "attribute": "liquid",
                    "change": "more likely"
                },
                {
                    "type": "openpi_entity",
                    "entity": "butter",
                    "attribute": "solid",
                    "change": "less likely"
                },
                {
                    "type": "openpi_entity",
                    "entity": "fork",
                    "attribute": "dirty",
                    "change": "more likely"
                },
                {
                    "type": "openpi_entity",
                    "entity": "fork",
                    "attribute": "clean",
                    "change": "less likely"
                },
                {
                    "type": "openpi_entity",
                    "entity": "butter",
                    "attribute": "melted",
                    "change": "more likely"
                },
                {
                    "type": "openpi_entity",
                    "entity": "butter",
                    "attribute": "solid",
                    "change": "less likely"
                },
                {
                    "type": "openpi_entity",
                    "entity": "frying pan",
                    "attribute": "heavier",
                    "change": "more likely"
                },
                {
                    "type": "openpi_entity",
                    "entity": "frying pan",
                    "attribute": "lighter",
                    "change": "less likely"
                },
                {
                    "type": "openpi_entity",
                    "entity": "butter",
                    "attribute": "hot",
                    "change": "more likely"
                },
                {
                    "type": "openpi_entity",
                    "entity": "butter",
                    "attribute": "room temperature",
                    "change": "less likely"
                },
                {
                    "type": "openpi_entity",
                    "entity": "frying pan",
                    "attribute": "hot",
                    "change": "more likely"
                },
                {
                    "type": "openpi_entity",
                    "entity": "frying pan",
                    "attribute": "cold",
                    "change": "less likely"
                },
                {
                    "type": "openpi_entity",
                    "entity": "hand",
                    "attribute": "on wheel",
                    "change": "more likely"
                },
                {
                    "type": "openpi_entity",
                    "entity": "hand",
                    "attribute": "at side",
                    "change": "less likely"
                },
                {
                    "type": "openpi_entity",
                    "entity": "skillet",
                    "attribute": "dirty",
                    "change": "more likely"
                },
                {
                    "type": "openpi_entity",
                    "entity": "skillet",
                    "attribute": "clean",
                    "change": "less likely"
                },
                {
                    "type": "openpi_entity",
                    "entity": "butter",
                    "attribute": "hot",
                    "change": "more likely"
                },
                {
                    "type": "openpi_entity",
                    "entity": "butter",
                    "attribute": "cold",
                    "change": "less likely"
                },
                {
                    "type": "openpi_entity",
                    "entity": "butter",
                    "attribute": "melted",
                    "change": "more likely"
                },
                {
                    "type": "openpi_entity",
                    "entity": "butter",
                    "attribute": "solid",
                    "change": "less likely"
                },
                {
                    "type": "openpi_entity",
                    "entity": "butter",
                    "attribute": "liquid",
                    "change": "more likely"
                },
                {
                    "type": "openpi_entity",
                    "entity": "butter",
                    "attribute": "solid",
                    "change": "less likely"
                },
                {
                    "type": "openpi_entity",
                    "entity": "butter",
                    "attribute": "on the frying pan",
                    "change": "more likely"
                },
                {
                    "type": "openpi_entity",
                    "entity": "butter",
                    "attribute": "in the fridge",
                    "change": "less likely"
                },
                {
                    "type": "openpi_entity",
                    "entity": "skillet",
                    "attribute": "wet",
                    "change": "more likely"
                },
                {
                    "type": "openpi_entity",
                    "entity": "skillet",
                    "attribute": "dry",
                    "change": "less likely"
                }
            ],
            [
                {
                    "type": "step",
                    "step": "Cook for about two minutes or until the pancake is golden."
                },
                {
                    "type": "entity",
                    "entity": "the eggs",
                    "attribute": "liquid",
                    "change": "less likely"
                },
                {
                    "type": "entity",
                    "entity": "the butter",
                    "attribute": "liquid",
                    "change": "less likely"
                },
                {
                    "type": "openpi_entity",
                    "entity": "butter",
                    "attribute": "golden",
                    "change": "more likely"
                },
                {
                    "type": "openpi_entity",
                    "entity": "butter",
                    "attribute": "raw",
                    "change": "less likely"
                },
                {
                    "type": "openpi_entity",
                    "entity": "pan",
                    "attribute": "hot",
                    "change": "more likely"
                },
                {
                    "type": "openpi_entity",
                    "entity": "pan",
                    "attribute": "cool",
                    "change": "less likely"
                },
                {
                    "type": "openpi_entity",
                    "entity": "batter",
                    "attribute": "hotter",
                    "change": "more likely"
                },
                {
                    "type": "openpi_entity",
                    "entity": "batter",
                    "attribute": "cooler",
                    "change": "less likely"
                },
                {
                    "type": "openpi_entity",
                    "entity": "batter",
                    "attribute": "browned",
                    "change": "more likely"
                },
                {
                    "type": "openpi_entity",
                    "entity": "batter",
                    "attribute": "white",
                    "change": "less likely"
                },
                {
                    "type": "openpi_entity",
                    "entity": "butter",
                    "attribute": "cooked",
                    "change": "more likely"
                },
                {
                    "type": "openpi_entity",
                    "entity": "butter",
                    "attribute": "raw",
                    "change": "less likely"
                },
                {
                    "type": "openpi_entity",
                    "entity": "mixture",
                    "attribute": "firm",
                    "change": "more likely"
                },
                {
                    "type": "openpi_entity",
                    "entity": "mixture",
                    "attribute": "soft",
                    "change": "less likely"
                },
                {
                    "type": "openpi_entity",
                    "entity": "pan",
                    "attribute": "fuller",
                    "change": "more likely"
                },
                {
                    "type": "openpi_entity",
                    "entity": "pan",
                    "attribute": "empty",
                    "change": "less likely"
                },
                {
                    "type": "openpi_entity",
                    "entity": "pan",
                    "attribute": "cool",
                    "change": "more likely"
                },
                {
                    "type": "openpi_entity",
                    "entity": "pan",
                    "attribute": "hot",
                    "change": "less likely"
                },
                {
                    "type": "openpi_entity",
                    "entity": "batter",
                    "attribute": "solid",
                    "change": "more likely"
                },
                {
                    "type": "openpi_entity",
                    "entity": "batter",
                    "attribute": "liquid",
                    "change": "less likely"
                },
                {
                    "type": "openpi_entity",
                    "entity": "flour",
                    "attribute": "liquid",
                    "change": "more likely"
                },
                {
                    "type": "openpi_entity",
                    "entity": "flour",
                    "attribute": "solid",
                    "change": "less likely"
                }
            ],
            [
                {
                    "type": "step",
                    "step": "Cook the other side until golden and remove."
                },
                {
                    "type": "openpi_entity",
                    "entity": "other side",
                    "attribute": "cooler",
                    "change": "more likely"
                },
                {
                    "type": "openpi_entity",
                    "entity": "other side",
                    "attribute": "hot",
                    "change": "less likely"
                },
                {
                    "type": "openpi_entity",
                    "entity": "pan",
                    "attribute": "hot",
                    "change": "more likely"
                },
                {
                    "type": "openpi_entity",
                    "entity": "pan",
                    "attribute": "cool",
                    "change": "less likely"
                },
                {
                    "type": "openpi_entity",
                    "entity": "frying pan",
                    "attribute": "hot",
                    "change": "more likely"
                },
                {
                    "type": "openpi_entity",
                    "entity": "frying pan",
                    "attribute": "cool",
                    "change": "less likely"
                },
                {
                    "type": "openpi_entity",
                    "entity": "batter",
                    "attribute": "browned",
                    "change": "more likely"
                },
                {
                    "type": "openpi_entity",
                    "entity": "batter",
                    "attribute": "white",
                    "change": "less likely"
                },
                {
                    "type": "openpi_entity",
                    "entity": "batter",
                    "attribute": "crunchy",
                    "change": "more likely"
                },
                {
                    "type": "openpi_entity",
                    "entity": "batter",
                    "attribute": "soft",
                    "change": "less likely"
                },
                {
                    "type": "openpi_entity",
                    "entity": "filling",
                    "attribute": "golden",
                    "change": "more likely"
                },
                {
                    "type": "openpi_entity",
                    "entity": "filling",
                    "attribute": "white",
                    "change": "less likely"
                },
                {
                    "type": "openpi_entity",
                    "entity": "mixture",
                    "attribute": "smooth",
                    "change": "more likely"
                },
                {
                    "type": "openpi_entity",
                    "entity": "mixture",
                    "attribute": "chunky",
                    "change": "less likely"
                },
                {
                    "type": "openpi_entity",
                    "entity": "the other side",
                    "attribute": "more cooked",
                    "change": "more likely"
                },
                {
                    "type": "openpi_entity",
                    "entity": "the other side",
                    "attribute": "less cooked",
                    "change": "less likely"
                },
                {
                    "type": "openpi_entity",
                    "entity": "butter",
                    "attribute": "cooked",
                    "change": "more likely"
                },
                {
                    "type": "openpi_entity",
                    "entity": "butter",
                    "attribute": "raw",
                    "change": "less likely"
                },
                {
                    "type": "openpi_entity",
                    "entity": "other side",
                    "attribute": "hot",
                    "change": "more likely"
                },
                {
                    "type": "openpi_entity",
                    "entity": "other side",
                    "attribute": "cool",
                    "change": "less likely"
                },
                {
                    "type": "openpi_entity",
                    "entity": "butter",
                    "attribute": "flat",
                    "change": "more likely"
                },
                {
                    "type": "openpi_entity",
                    "entity": "butter",
                    "attribute": "round",
                    "change": "less likely"
                }
            ]
        ]
    },
    "22": {
        "goal": "How to Unclog a Toilet",
        "annotator": "Pujun Guan",
        "steps": [
            [
                {
                    "step": "Start."
                }
            ],
            [
                {
                    "type": "step",
                    "step": "Insert the plunger into the toilet bowl.\u00a0"
                },
                {
                    "type": "openpi_entity",
                    "entity": "toilet bowl",
                    "attribute": "in use",
                    "change": "more likely"
                },
                {
                    "type": "openpi_entity",
                    "entity": "toilet bowl",
                    "attribute": "in storage",
                    "change": "less likely"
                },
                {
                    "type": "openpi_entity",
                    "entity": "toilet bowl",
                    "attribute": "occupied",
                    "change": "more likely"
                },
                {
                    "type": "openpi_entity",
                    "entity": "toilet bowl",
                    "attribute": "open",
                    "change": "less likely"
                },
                {
                    "type": "openpi_entity",
                    "entity": "bowl",
                    "attribute": "sticky",
                    "change": "more likely"
                },
                {
                    "type": "openpi_entity",
                    "entity": "bowl",
                    "attribute": "smooth",
                    "change": "less likely"
                },
                {
                    "type": "openpi_entity",
                    "entity": "toilet bowl",
                    "attribute": "filled with a little bit of liquid",
                    "change": "more likely"
                },
                {
                    "type": "openpi_entity",
                    "entity": "toilet bowl",
                    "attribute": "empty",
                    "change": "less likely"
                },
                {
                    "type": "openpi_entity",
                    "entity": "screwdriver",
                    "attribute": "vertical",
                    "change": "more likely"
                },
                {
                    "type": "openpi_entity",
                    "entity": "screwdriver",
                    "attribute": "horizontal",
                    "change": "less likely"
                },
                {
                    "type": "openpi_entity",
                    "entity": "wall",
                    "attribute": "gripping",
                    "change": "more likely"
                },
                {
                    "type": "openpi_entity",
                    "entity": "wall",
                    "attribute": "dry",
                    "change": "less likely"
                },
                {
                    "type": "openpi_entity",
                    "entity": "the plunger",
                    "attribute": "inserted into the bowl",
                    "change": "more likely"
                },
                {
                    "type": "openpi_entity",
                    "entity": "the plunger",
                    "attribute": "separate",
                    "change": "less likely"
                },
                {
                    "type": "openpi_entity",
                    "entity": "the plunger",
                    "attribute": "inside the bowl",
                    "change": "more likely"
                },
                {
                    "type": "openpi_entity",
                    "entity": "the plunger",
                    "attribute": "outside of the bowl",
                    "change": "less likely"
                },
                {
                    "type": "openpi_entity",
                    "entity": "toilet bowl",
                    "attribute": "full",
                    "change": "more likely"
                },
                {
                    "type": "openpi_entity",
                    "entity": "toilet bowl",
                    "attribute": "empty",
                    "change": "less likely"
                }
            ],
            [
                {
                    "type": "step",
                    "step": "Pump the plunger over the hole.\u00a0"
                },
                {
                    "type": "openpi_entity",
                    "entity": "the toilet bowl",
                    "attribute": "facing upwards",
                    "change": "more likely"
                },
                {
                    "type": "openpi_entity",
                    "entity": "the toilet bowl",
                    "attribute": "facing backwards",
                    "change": "less likely"
                },
                {
                    "type": "openpi_entity",
                    "entity": "hole",
                    "attribute": "full",
                    "change": "more likely"
                },
                {
                    "type": "openpi_entity",
                    "entity": "hole",
                    "attribute": "empty",
                    "change": "less likely"
                },
                {
                    "type": "openpi_entity",
                    "entity": "hand",
                    "attribute": "on top of body",
                    "change": "more likely"
                },
                {
                    "type": "openpi_entity",
                    "entity": "hand",
                    "attribute": "by side of body",
                    "change": "less likely"
                },
                {
                    "type": "openpi_entity",
                    "entity": "the plunger",
                    "attribute": "inside the hole",
                    "change": "more likely"
                },
                {
                    "type": "openpi_entity",
                    "entity": "the plunger",
                    "attribute": "out of the hole",
                    "change": "less likely"
                }
            ],
            [
                {
                    "type": "step",
                    "step": "Flush the toilet to check the drainage."
                },
                {
                    "type": "entity",
                    "entity": "the pipe",
                    "attribute": "been clogged",
                    "change": "less likely"
                },
                {
                    "type": "multihop",
                    "event": "I use the toilet.",
                    "change": "more likely"
                },
                {
                    "type": "openpi_entity",
                    "entity": "bowl",
                    "attribute": "full",
                    "change": "more likely"
                },
                {
                    "type": "openpi_entity",
                    "entity": "bowl",
                    "attribute": "empty",
                    "change": "less likely"
                },
                {
                    "type": "openpi_entity",
                    "entity": "toilet",
                    "attribute": "dry",
                    "change": "more likely"
                },
                {
                    "type": "openpi_entity",
                    "entity": "toilet",
                    "attribute": "wet",
                    "change": "less likely"
                },
                {
                    "type": "openpi_entity",
                    "entity": "toilet",
                    "attribute": "filled with less liquid",
                    "change": "more likely"
                },
                {
                    "type": "openpi_entity",
                    "entity": "toilet",
                    "attribute": "filled with liquid",
                    "change": "less likely"
                },
                {
                    "type": "openpi_entity",
                    "entity": "the drain",
                    "attribute": "dry",
                    "change": "more likely"
                },
                {
                    "type": "openpi_entity",
                    "entity": "the drain",
                    "attribute": "wet",
                    "change": "less likely"
                },
                {
                    "type": "openpi_entity",
                    "entity": "mixture",
                    "attribute": "dry",
                    "change": "more likely"
                },
                {
                    "type": "openpi_entity",
                    "entity": "mixture",
                    "attribute": "wet",
                    "change": "less likely"
                },
                {
                    "type": "openpi_entity",
                    "entity": "toilet",
                    "attribute": "wet",
                    "change": "more likely"
                },
                {
                    "type": "openpi_entity",
                    "entity": "toilet",
                    "attribute": "dry",
                    "change": "less likely"
                },
                {
                    "type": "openpi_entity",
                    "entity": "toilet",
                    "attribute": "clean",
                    "change": "more likely"
                },
                {
                    "type": "openpi_entity",
                    "entity": "toilet",
                    "attribute": "dirty",
                    "change": "less likely"
                }
            ]
        ]
    },
    "23": {
        "goal": "How to Make Rice Cakes",
        "annotator": "Pujun Guan",
        "steps": [
            [
                {
                    "step": "Start."
                }
            ],
            [
                {
                    "type": "step",
                    "step": "Wet your fingers and mold cooked sticky rice into circular cake shapes."
                },
                {
                    "type": "openpi_entity",
                    "entity": "rice",
                    "attribute": "wet",
                    "change": "more likely"
                },
                {
                    "type": "openpi_entity",
                    "entity": "rice",
                    "attribute": "dry",
                    "change": "less likely"
                },
                {
                    "type": "openpi_entity",
                    "entity": "sticky rice",
                    "attribute": "on the fingers",
                    "change": "more likely"
                },
                {
                    "type": "openpi_entity",
                    "entity": "sticky rice",
                    "attribute": "in a bowl",
                    "change": "less likely"
                },
                {
                    "type": "openpi_entity",
                    "entity": "hot water",
                    "attribute": "on the fingers",
                    "change": "more likely"
                },
                {
                    "type": "openpi_entity",
                    "entity": "hot water",
                    "attribute": "in a bowl",
                    "change": "less likely"
                },
                {
                    "type": "openpi_entity",
                    "entity": "sticky rice",
                    "attribute": "soft",
                    "change": "more likely"
                },
                {
                    "type": "openpi_entity",
                    "entity": "sticky rice",
                    "attribute": "hard",
                    "change": "less likely"
                },
                {
                    "type": "openpi_entity",
                    "entity": "bowl",
                    "attribute": "empty",
                    "change": "more likely"
                },
                {
                    "type": "openpi_entity",
                    "entity": "bowl",
                    "attribute": "full",
                    "change": "less likely"
                },
                {
                    "type": "openpi_entity",
                    "entity": "rice",
                    "attribute": "hot",
                    "change": "more likely"
                },
                {
                    "type": "openpi_entity",
                    "entity": "rice",
                    "attribute": "cold",
                    "change": "less likely"
                },
                {
                    "type": "openpi_entity",
                    "entity": "rice",
                    "attribute": "soft",
                    "change": "more likely"
                },
                {
                    "type": "openpi_entity",
                    "entity": "rice",
                    "attribute": "hard",
                    "change": "less likely"
                },
                {
                    "type": "openpi_entity",
                    "entity": "liquid",
                    "attribute": "on the rice",
                    "change": "more likely"
                },
                {
                    "type": "openpi_entity",
                    "entity": "liquid",
                    "attribute": "in a bowl",
                    "change": "less likely"
                }
            ],
            [
                {
                    "type": "step",
                    "step": "Let the shaped cakes dry at room temperature for 1-2 hours."
                },
                {
                    "type": "openpi_entity",
                    "entity": "cake",
                    "attribute": "cool",
                    "change": "more likely"
                },
                {
                    "type": "openpi_entity",
                    "entity": "cake",
                    "attribute": "room temperature",
                    "change": "less likely"
                },
                {
                    "type": "openpi_entity",
                    "entity": "moist rice",
                    "attribute": "on cakes",
                    "change": "more likely"
                },
                {
                    "type": "openpi_entity",
                    "entity": "moist rice",
                    "attribute": "on tray",
                    "change": "less likely"
                },
                {
                    "type": "openpi_entity",
                    "entity": "cake",
                    "attribute": "cold",
                    "change": "more likely"
                },
                {
                    "type": "openpi_entity",
                    "entity": "cake",
                    "attribute": "room temperature",
                    "change": "less likely"
                },
                {
                    "type": "openpi_entity",
                    "entity": "rice",
                    "attribute": "soft",
                    "change": "more likely"
                },
                {
                    "type": "openpi_entity",
                    "entity": "rice",
                    "attribute": "hard",
                    "change": "less likely"
                }
            ],
            [
                {
                    "type": "step",
                    "step": "Pour 44.36 mL (3.000 US tbsp) of olive oil into a skillet."
                },
                {
                    "type": "openpi_entity",
                    "entity": "oil",
                    "attribute": "in the skillet",
                    "change": "more likely"
                },
                {
                    "type": "openpi_entity",
                    "entity": "oil",
                    "attribute": "in the bottle",
                    "change": "less likely"
                },
                {
                    "type": "openpi_entity",
                    "entity": "oil",
                    "attribute": "in pan",
                    "change": "more likely"
                },
                {
                    "type": "openpi_entity",
                    "entity": "oil",
                    "attribute": "in bottle",
                    "change": "less likely"
                },
                {
                    "type": "openpi_entity",
                    "entity": "pan",
                    "attribute": "hot",
                    "change": "more likely"
                },
                {
                    "type": "openpi_entity",
                    "entity": "pan",
                    "attribute": "cool",
                    "change": "less likely"
                },
                {
                    "type": "openpi_entity",
                    "entity": "wood",
                    "attribute": "burning",
                    "change": "more likely"
                },
                {
                    "type": "openpi_entity",
                    "entity": "wood",
                    "attribute": "solid",
                    "change": "less likely"
                },
                {
                    "type": "openpi_entity",
                    "entity": "olive oil",
                    "attribute": "in the skillet",
                    "change": "more likely"
                },
                {
                    "type": "openpi_entity",
                    "entity": "olive oil",
                    "attribute": "in the bottle",
                    "change": "less likely"
                },
                {
                    "type": "openpi_entity",
                    "entity": "oil bottle",
                    "attribute": "less full",
                    "change": "more likely"
                },
                {
                    "type": "openpi_entity",
                    "entity": "oil bottle",
                    "attribute": "more full",
                    "change": "less likely"
                },
                {
                    "type": "openpi_entity",
                    "entity": "oil",
                    "attribute": "mixed",
                    "change": "more likely"
                },
                {
                    "type": "openpi_entity",
                    "entity": "oil",
                    "attribute": "separate",
                    "change": "less likely"
                },
                {
                    "type": "openpi_entity",
                    "entity": "skillet",
                    "attribute": "in use",
                    "change": "more likely"
                },
                {
                    "type": "openpi_entity",
                    "entity": "skillet",
                    "attribute": "in storage",
                    "change": "less likely"
                },
                {
                    "type": "openpi_entity",
                    "entity": "pan",
                    "attribute": "full",
                    "change": "more likely"
                },
                {
                    "type": "openpi_entity",
                    "entity": "pan",
                    "attribute": "empty",
                    "change": "less likely"
                },
                {
                    "type": "openpi_entity",
                    "entity": "skillet",
                    "attribute": "dirty",
                    "change": "more likely"
                },
                {
                    "type": "openpi_entity",
                    "entity": "skillet",
                    "attribute": "clean",
                    "change": "less likely"
                },
                {
                    "type": "openpi_entity",
                    "entity": "oil",
                    "attribute": "stinky",
                    "change": "more likely"
                },
                {
                    "type": "openpi_entity",
                    "entity": "oil",
                    "attribute": "plain smelling",
                    "change": "less likely"
                },
                {
                    "type": "openpi_entity",
                    "entity": "oil",
                    "attribute": "dry",
                    "change": "more likely"
                },
                {
                    "type": "openpi_entity",
                    "entity": "oil",
                    "attribute": "wet",
                    "change": "less likely"
                },
                {
                    "type": "openpi_entity",
                    "entity": "oil",
                    "attribute": "hot",
                    "change": "more likely"
                },
                {
                    "type": "openpi_entity",
                    "entity": "oil",
                    "attribute": "cool",
                    "change": "less likely"
                }
            ],
            [
                {
                    "type": "step",
                    "step": "Bring the oil to a 204.455 \u00b0C (400.019 \u00b0F) boil."
                },
                {
                    "type": "openpi_entity",
                    "entity": "stove",
                    "attribute": "off",
                    "change": "more likely"
                },
                {
                    "type": "openpi_entity",
                    "entity": "stove",
                    "attribute": "on",
                    "change": "less likely"
                },
                {
                    "type": "openpi_entity",
                    "entity": "pan",
                    "attribute": "hotter",
                    "change": "more likely"
                },
                {
                    "type": "openpi_entity",
                    "entity": "pan",
                    "attribute": "cold",
                    "change": "less likely"
                },
                {
                    "type": "openpi_entity",
                    "entity": "pan",
                    "attribute": "hotter",
                    "change": "more likely"
                },
                {
                    "type": "openpi_entity",
                    "entity": "pan",
                    "attribute": "cooler",
                    "change": "less likely"
                },
                {
                    "type": "openpi_entity",
                    "entity": "pan",
                    "attribute": "hot",
                    "change": "more likely"
                },
                {
                    "type": "openpi_entity",
                    "entity": "pan",
                    "attribute": "cool",
                    "change": "less likely"
                },
                {
                    "type": "openpi_entity",
                    "entity": "mixture",
                    "attribute": "cool",
                    "change": "more likely"
                },
                {
                    "type": "openpi_entity",
                    "entity": "mixture",
                    "attribute": "hot",
                    "change": "less likely"
                },
                {
                    "type": "openpi_entity",
                    "entity": "pan",
                    "attribute": "hot",
                    "change": "more likely"
                },
                {
                    "type": "openpi_entity",
                    "entity": "pan",
                    "attribute": "hot",
                    "change": "less likely"
                },
                {
                    "type": "openpi_entity",
                    "entity": "oil",
                    "attribute": "hotter",
                    "change": "more likely"
                },
                {
                    "type": "openpi_entity",
                    "entity": "oil",
                    "attribute": "cooler",
                    "change": "less likely"
                },
                {
                    "type": "openpi_entity",
                    "entity": "stove",
                    "attribute": "off",
                    "change": "more likely"
                },
                {
                    "type": "openpi_entity",
                    "entity": "stove",
                    "attribute": "on",
                    "change": "less likely"
                },
                {
                    "type": "openpi_entity",
                    "entity": "the pan",
                    "attribute": "off",
                    "change": "more likely"
                },
                {
                    "type": "openpi_entity",
                    "entity": "the pan",
                    "attribute": "on fire",
                    "change": "less likely"
                },
                {
                    "type": "openpi_entity",
                    "entity": "flame",
                    "attribute": "present",
                    "change": "more likely"
                },
                {
                    "type": "openpi_entity",
                    "entity": "flame",
                    "attribute": "absent",
                    "change": "less likely"
                },
                {
                    "type": "openpi_entity",
                    "entity": "pan",
                    "attribute": "cooler",
                    "change": "more likely"
                },
                {
                    "type": "openpi_entity",
                    "entity": "pan",
                    "attribute": "hotter",
                    "change": "less likely"
                },
                {
                    "type": "openpi_entity",
                    "entity": "oil",
                    "attribute": "hot",
                    "change": "more likely"
                },
                {
                    "type": "openpi_entity",
                    "entity": "oil",
                    "attribute": "cool",
                    "change": "less likely"
                }
            ],
            [
                {
                    "type": "step",
                    "step": "Place 1-2 rice cakes in the oil. "
                },
                {
                    "type": "openpi_entity",
                    "entity": "oil",
                    "attribute": "cooler",
                    "change": "more likely"
                },
                {
                    "type": "openpi_entity",
                    "entity": "oil",
                    "attribute": "hotter",
                    "change": "less likely"
                },
                {
                    "type": "openpi_entity",
                    "entity": "pan",
                    "attribute": "hot",
                    "change": "more likely"
                },
                {
                    "type": "openpi_entity",
                    "entity": "pan",
                    "attribute": "cool",
                    "change": "less likely"
                },
                {
                    "type": "openpi_entity",
                    "entity": "oil",
                    "attribute": "in the pan",
                    "change": "more likely"
                },
                {
                    "type": "openpi_entity",
                    "entity": "oil",
                    "attribute": "in a bottle",
                    "change": "less likely"
                },
                {
                    "type": "openpi_entity",
                    "entity": "pan",
                    "attribute": "in cupboard",
                    "change": "more likely"
                },
                {
                    "type": "openpi_entity",
                    "entity": "pan",
                    "attribute": "on table",
                    "change": "less likely"
                },
                {
                    "type": "openpi_entity",
                    "entity": "oil",
                    "attribute": "400 degrees fahrenheit",
                    "change": "more likely"
                },
                {
                    "type": "openpi_entity",
                    "entity": "oil",
                    "attribute": "212 degrees fahrenheit",
                    "change": "less likely"
                },
                {
                    "type": "openpi_entity",
                    "entity": "pan",
                    "attribute": "heavier",
                    "change": "more likely"
                },
                {
                    "type": "openpi_entity",
                    "entity": "pan",
                    "attribute": "lighter",
                    "change": "less likely"
                },
                {
                    "type": "openpi_entity",
                    "entity": "pan",
                    "attribute": "dirtier",
                    "change": "more likely"
                },
                {
                    "type": "openpi_entity",
                    "entity": "pan",
                    "attribute": "clean",
                    "change": "less likely"
                },
                {
                    "type": "openpi_entity",
                    "entity": "oil",
                    "attribute": "212 degrees fahrenheit",
                    "change": "more likely"
                },
                {
                    "type": "openpi_entity",
                    "entity": "oil",
                    "attribute": "212 degrees fahrenheit",
                    "change": "less likely"
                }
            ],
            [
                {
                    "type": "step",
                    "step": "Remove the rice cakes from the oil when they rise to the surface."
                },
                {
                    "type": "entity",
                    "entity": "the rice cake",
                    "attribute": "hot",
                    "change": "more likely"
                },
                {
                    "type": "entity",
                    "entity": "the rice cake",
                    "attribute": "crispy",
                    "change": "more likely"
                },
                {
                    "type": "entity",
                    "entity": "the rice cake",
                    "attribute": "hard",
                    "change": "more likely"
                },
                {
                    "type": "openpi_entity",
                    "entity": "oil",
                    "attribute": "cooler",
                    "change": "more likely"
                },
                {
                    "type": "openpi_entity",
                    "entity": "oil",
                    "attribute": "hotter",
                    "change": "less likely"
                },
                {
                    "type": "openpi_entity",
                    "entity": "pan",
                    "attribute": "on the table",
                    "change": "more likely"
                },
                {
                    "type": "openpi_entity",
                    "entity": "pan",
                    "attribute": "in the cupboard",
                    "change": "less likely"
                },
                {
                    "type": "openpi_entity",
                    "entity": "pan",
                    "attribute": "on the stove",
                    "change": "more likely"
                },
                {
                    "type": "openpi_entity",
                    "entity": "pan",
                    "attribute": "on the counter",
                    "change": "less likely"
                },
                {
                    "type": "openpi_entity",
                    "entity": "cake",
                    "attribute": "cooler",
                    "change": "more likely"
                },
                {
                    "type": "openpi_entity",
                    "entity": "cake",
                    "attribute": "hotter",
                    "change": "less likely"
                },
                {
                    "type": "openpi_entity",
                    "entity": "spoon",
                    "attribute": "dirty",
                    "change": "more likely"
                },
                {
                    "type": "openpi_entity",
                    "entity": "spoon",
                    "attribute": "clean",
                    "change": "less likely"
                },
                {
                    "type": "openpi_entity",
                    "entity": "oil",
                    "attribute": "cooler",
                    "change": "more likely"
                },
                {
                    "type": "openpi_entity",
                    "entity": "oil",
                    "attribute": "hotter",
                    "change": "less likely"
                }
            ],
            [
                {
                    "type": "step",
                    "step": "Serve the rice cakes within one day of making them."
                },
                {
                    "type": "entity",
                    "entity": "the rice cake",
                    "attribute": "hot",
                    "change": "less likely"
                },
                {
                    "type": "multihop",
                    "event": "I eat the rice cake safely.",
                    "change": "more likely"
                },
                {
                    "type": "openpi_entity",
                    "entity": "cake",
                    "attribute": "cooling",
                    "change": "more likely"
                },
                {
                    "type": "openpi_entity",
                    "entity": "cake",
                    "attribute": "hot",
                    "change": "less likely"
                },
                {
                    "type": "openpi_entity",
                    "entity": "oil bottle",
                    "attribute": "lighter",
                    "change": "more likely"
                },
                {
                    "type": "openpi_entity",
                    "entity": "oil bottle",
                    "attribute": "heavier",
                    "change": "less likely"
                },
                {
                    "type": "openpi_entity",
                    "entity": "cake",
                    "attribute": "cooler",
                    "change": "more likely"
                },
                {
                    "type": "openpi_entity",
                    "entity": "cake",
                    "attribute": "hotter",
                    "change": "less likely"
                },
                {
                    "type": "openpi_entity",
                    "entity": "serving plate",
                    "attribute": "heavier",
                    "change": "more likely"
                },
                {
                    "type": "openpi_entity",
                    "entity": "serving plate",
                    "attribute": "lighter",
                    "change": "less likely"
                },
                {
                    "type": "openpi_entity",
                    "entity": "cake",
                    "attribute": "on the plate",
                    "change": "more likely"
                },
[truncated: 4,112,004 more chars]
