# Supplementary material
Source: ML conference proceedings conference paper supplement (https://aclanthology.org/2023.findings-eacl.31)
Supplement: dataset [file 2023.findings-eacl.31.dataset.zip › causal_reasoning_of_entities_and_events/openpi/weiqiu1.0/0hop-predictions-formatted.jsonl]

{"id": "Sear a steak|1", "answers": ["temperature of food was cold before and hot afterwards", "temperature of steak was room temperature before and heated afterwards", "temperature of stove was cold before and hot afterwards", "temperature of temperature was unset before and set afterwards", "temperature of room was cold before and hot afterwards", "power of thermostat was turned off before and turned on afterwards", "temperature of pot was cold before and hot afterwards", "temperature of steel rod was cold before and hot afterwards", "temperature of pan was cold before and hot afterwards."]}
{"id": "Sear a steak|2", "answers": ["power of stove was off before and on afterwards", "temperature of pan was cool before and hot afterwards", "state of stove was off before and on afterwards", "temperature of pan was cold before and hot afterwards", "power of stove was off before and on afterwards", "temperature of pan was cool before and hot afterwards", "state of stove was off before and on afterwards", "temperature of stove burner was cold before and hot afterwards", "location of stove was in unit before and in storage afterwards", "temperature of stove burner was cool before and hot afterwards", "temperature of pan was cool before and hot afterwards."]}
{"id": "Sear a steak|3", "answers": ["setting of oil temperature was unset before and set afterwards", "state of pan was empty before and hot afterwards", "temperature of olive oil was cool before and hot afterwards", "temperature of pan was cool before and hot afterwards", "odor of pan was bland smelling before and spicy smelling afterwards", "location of olive oil was in container before and in pan afterwards", "state of smoke was absent before and present afterwards", "temperature of pan was cool before and hot afterwards."]}
{"id": "Sear a steak|4", "answers": ["color of avoyard was white before and browned afterwards", "temperature of avoyard was cool before and hot afterwards", "moisture of skillet was dry before and wet afterwards", "cleanness of skillet was clean before and dirty afterwards", "cooked of steak was raw before and cooked afterwards", "location of olive oil was in a bottle before and on the pan afterwards", "temperature of oil was cool before and hot afterwards", "color of oil was white before and browned afterwards", "color of skillet was shiny before and dark afterwards."]}
{"id": "Sear a steak|5", "answers": ["temperature of food was cool before and hot afterwards", "temperature of pan was cold before and hot afterwards", "temperature of pan was cold before and hot afterwards", "state of food was raw before and cooked afterwards", "readiness of pan was uncooked before and cooked afterwards", "temperature of pan was cold before and hot afterwards", "power of oven was off before and on afterwards", "temperature of oil was cold before and hot afterwards", "location of pan was drawer before and in oven afterwards", "temperature of plate was cold before and hot afterwards", "electric conductivity of stove was off before and on afterwards", "temperature of food was cold before and hot afterwards."]}
{"id": "Sear a steak|6", "answers": ["location of pan was in the cabinet before and on the table afterwards", "volume of sauce was full before and empty afterwards", "temperature of plate was cool before and hot afterwards", "location of plate was in the cabinet before and on the table afterwards", "location of the pan was in the oven before and out of the oven afterwards", "temperature of the food was hot before and cooled afterwards", "temperature of pan was hot before and cooler afterwards", "cleanness of plate was clean before and dirty afterwards", "temperature of pan was hot before and cool afterwards", "location of pan was on stove before and off stove afterwards", "taste of the food was unseasoned before and seasoned afterwards."]}
{"id": "Sear a steak|7", "answers": ["state of the pan was wetter before and drier afterwards", "temperature of the pan was hotter before and cooler afterwards", "cleanness of the pan was dirtier before and cleaner afterwards", "temperature of pan was hot before and cooler afterwards", "location of the pan was out of the oven before and in the oven afterwards", "temperature of sauce was hotter before and cooler afterwards", "temperature of pan was hot before and cool afterwards", "temperature of pan was hot before and cool afterwards", "wetness of pan was wet before and dry afterwards", "cleanness of pan was dirty before and clean afterwards", "temperature of pan was hot before and cool afterwards."]}
{"id": "Do laundry with a washing machine|1", "answers": ["state of door was closed before and open afterwards", "state of door was closed before and open afterwards", "power of washing machine was off before and on afterwards", "openness of door was closed before and open afterwards", "state of door was closed before and open afterwards", "sound of room was peaceful before and noisy afterwards", "power of door was shut before and open afterwards."]}
{"id": "Do laundry with a washing machine|2", "answers": ["openness of door was closed before and open afterwards", "location of laundry was outside of machine before and inside of machine afterwards", "power of washing machine was off before and on afterwards", "weight of washing machine was lighter before and heavier afterwards", "state of door was closed before and open afterwards", "location of laundry was outside of the machine before and inside the machine afterwards", "location of machine was in cupboard before and on counter afterwards."]}
{"id": "Do laundry with a washing machine|3", "answers": ["opening of door was locked before and unlocked afterwards", "state of door was closed before and open afterwards", "power of washing machine was off before and on afterwards", "location of laundry was inside before and outside afterwards", "sound of room was quiet before and loud afterwards", "position of door was closed before and open afterwards", "electric conductivity of washing machine was turned off before and turned on afterwards", "state of door was closed before and open afterwards", "state of door was closed before and open afterwards."]}
{"id": "Do laundry with a washing machine|4", "answers": ["odor of detergent was strong smelling before and neutral smelling afterwards", "location of detergents were in container before and in washing machine afterwards", "fullness of laundry container was fuller before and emptier afterwards", "weight of detergent container was heavier before and lighter afterwards", "volume of laundry compartment was fuller before and emptier afterwards", "location of detergent was in bottle before and in washing machine afterwards", "location of lid was on door before and off door afterwards."]}
{"id": "Do laundry with a washing machine|5", "answers": ["state of person was cycle pediculous before and learned to cycle afterwards", "location of detergent was in container before and in the drain afterwards"]}
{"id": "Do laundry with a washing machine|6", "answers": ["power of power was off before and on afterwards", "state of start was unstarted before and started afterwards", "state of timer was off before and on afterwards", "electric conductivity of washing machine was turned off before and turned on afterwards", "state of timer was off before and on afterwards", "state of the door was closed before and open afterwards", "volume of the door was fuller before and less full afterwards", "state of cycle was complete before and finished afterwards", "state of door was closed before and open afterwards."]}
{"id": "Do laundry with a washing machine|7", "answers": ["temperature of the machine was cooler before and warmer afterwards", "state of laundry was wet before and dry afterwards", "power of washing machine was off before and on afterwards", "volume of the basket was fuller before and empty afterwards", "electric conductivity of washing machine was turned off before and turned on afterwards", "location of detergent was in bottle before and in laundry afterwards", "location of laundry was in basket before and in drying rack afterwards"]}
{"id": "Arrange Flowers in a Vase|1", "answers": ["color of paintbrush was white before and green afterwards", "location of vase was in cupboard before and on counter afterwards", "location of paint was in can before and in vase afterwards"]}
{"id": "Arrange Flowers in a Vase|2", "answers": ["weight of basket was lighter before and heavier afterwards", "location of elastic hair tie was in a basket before and on the table afterwards", "location of tie was on the spool before and on the neck and back end of the flower afterwards", "shape of elastic hair tie was untied before and tied from the spool to the flower afterwards", "composition of flower was unadorned before and adorned with a ribbon afterwards", "location of elastic hair tie was loose before and attached to flower afterwards", "location of ribbon was in the closet before and on the table afterwards", "organization of table was bare before and decorated afterwards."]}
{"id": "Arrange Flowers in a Vase|3", "answers": ["temperature of container was warm before and cool afterwards", "location of cool water was in faucet before and in vase afterwards", "location of water was in the sink before and in the vase afterwards", "state of vase was empty before and full afterwards", "volume of container was full before and empty afterwards", "wetness of vase was dry before and wet afterwards", "wetness of water was dry before and wet afterwards", "volume of bottle was full before and empty afterwards", "wetness of vase was dry before and wet afterwards", "temperature of water was warm before and cool afterwards."]}
{"id": "Arrange Flowers in a Vase|4", "answers": ["location of bleach was outside of spray bottle before and inside bottle afterwards", "volume of spray bottle was empty before and full afterwards", "location of bleach was in the container before and in the water afterwards", "moisture of bow tie was dry before and wet afterwards", "wetness of vase was dry before and wet afterwards", "volume of container was full before and emptier afterwards", "color of water was clear before and whitish afterwards", "location of bleach was in the bottle before and in the sink afterwards", "wetness of elastic hair tie was dry before and wet with bleach afterwards", "wetness of bucket was dry before and wet with bleach afterwards", "weight of bottle was heavy before and light afterwards", "cleanness of bow tie was clean before and dirty afterwards", "color of water was clear before and whitish afterwards."]}
{"id": "Arrange Flowers in a Vase|5", "answers": ["cleanness of vase was dirty before and clean afterwards"]}
{"id": "Arrange Flowers in a Vase|6", "answers": ["state of flower was whole before and cut afterwards."]}
{"id": "Arrange Flowers in a Vase|7", "answers": ["volume of bowl was full before and empty afterwards", "location of flower was outside of vase before and inside vase afterwards", "state of vase was empty before and full afterwards", "location of flower was on counter before and in vase afterwards."]}
{"id": "Wash sneakers|1", "answers": ["clarity of dirt was obscured before and clear afterwards", "location of dirt was on surface before and on rag afterwards", "state of dirt was present before and removed afterwards", "moisture of roller was dry before and wet afterwards", "state of the rag was dry before and wet afterwards", "cleanness of paintbrush was clean before and dirty afterwards", "location of dirt was on surface before and brushed off afterwards", "location of dirt was on surface before and on rag afterwards", "clarity of air was clear before and dusty afterwards."]}
{"id": "Wash sneakers|2", "answers": ["cleanness of shoe was dirty before and clean afterwards", "location of dirt was on shoe before and on ground afterwards."]}
{"id": "Wash sneakers|3", "answers": ["location of soap was in the bottle before and on the feet afterwards", "location of soapy water was in the faucet before and on the shoes afterwards", "state of shoe was soapy before and rinsed afterwards", "dryness of shoe was wet before and dry afterwards", "location of soap was in bottle before and in water afterwards", "location of soapy water was in a bottle before and in a water container afterwards", "location of soapy water was in the bucket before and on the feet afterwards", "location of soapy water was in the faucet before and in a bucket afterwards."]}
{"id": "Wash sneakers|4", "answers": ["location of detergent was in bottle before and on shoes afterwards", "odor of water was soapy before and soapy smelling afterwards", "location of detergent was in a bottle before and on the feet afterwards", "location of detergent was in bottle before and on shoes afterwards", "fullness of bottle was more full before and less full afterwards"]}
{"id": "Wash sneakers|5", "answers": ["smell of sweat was on the sneakers before and gone afterwards", "location of water was on the sweat covered sneakers before and on the towel afterwards", "location of detergent was in bottle before and on sneakers afterwards", "moisture of towel was dry before and wet afterwards", "cleanness of shoe was dirty before and clean afterwards", "wetness of sock was dry before and wet afterwards."]}
{"id": "Wash sneakers|6", "answers": ["moisture of shoe was wet before and dry afterwards", "moisture of surface was wet before and dry afterwards"]}
{"id": "Wash sneakers|7", "answers": ["There will be no change."]}
{"id": "Steam broccoli|1", "answers": ["state of broccoli was messy before and clean afterwards", "moisture of broccoli was dry before and wet afterwards", "state of the broccoli was unsprayed before and pricked afterwards", "cleanness of broccoli was dirty before and cleaner afterwards", "cleanness of broccoli was dirty before and clean afterwards."]}
{"id": "Steam broccoli|2", "answers": ["location of stem was attached before and cut afterwards", "composition of broccoli was whole before and cut afterwards", "length of stem was longer before and shorter afterwards"]}
{"id": "Steam broccoli|3", "answers": ["fullness of saucepan was empty before and full afterwards", "temperature of broccoli was cool before and hot afterwards", "temperature of broccoli was room temperature before and heated afterwards", "location of broccoli was on counter before and in pan afterwards", "weight of broccoli basket was lighter before and heavier afterwards", "cleanness of broccoli was dirty before and clean afterwards", "weight of pan was light before and heavy afterwards", "weight of saucepan was light before and heavier afterwards", "state of broccoli was unstimulated before and stimulated afterwards", "location of broccoli was outside of saucepan before and inside saucepan afterwards."]}
{"id": "Steam broccoli|4", "answers": ["weight of broccoli was heavier before and lighter afterwards", "weight of broccoli was heavier before and lighter afterwards", "location of broccoli was outside of container before and in container afterwards", "weight of the basket was lighter before and heavier afterwards", "fullness of saucepan was emptier before and fuller afterwards", "weight of broccoli was heavier before and lighter afterwards."]}
{"id": "Steam broccoli|5", "answers": ["state of broccoli was cool before and hot afterwards", "temperature of broccoli was cool before and hot afterwards", "temperature of broccoli was cold before and hot afterwards", "location of broccoli was on the counter before and in the steamer basket afterwards", "temperature of broccoli was room temperature before and steamy afterwards", "power of stove was off before and on afterwards", "texture of broccoli was hard before and soft afterwards", "temperature of broccoli was cold before and hot afterwards."]}
{"id": "Steam broccoli|6", "answers": ["temperature of broccoli was hot before and cooler afterwards", "temperature of broccoli was hot before and cooler afterwards", "temperature of broccoli was hotter before and cooler afterwards", "temperature of broccoli was hotter before and cooler afterwards."]}
{"id": "Steam broccoli|7", "answers": ["location of broccoli was on the counter before and in the cupboard afterwards."]}
{"id": "Order food delivery with an app|1", "answers": ["location of location was unchosen before and chosen afterwards", "location of food was in store before and in your home afterwards", "location of location was unchosen before and chosen afterwards", "location of money was in wallet before and in cash register afterwards."]}
{"id": "Order food delivery with an app|2", "answers": ["volume of shopping cart was empty before and full afterwards", "volume of cart was empty before and full afterwards", "location of chicken was on the grill before and on the counter afterwards", "weight of cart was lighter before and heavier afterwards."]}
{"id": "Order food delivery with an app|3", "answers": ["location of package was on the table before and in the shopping cart afterwards", "location of package was at the store before and at the house afterwards", "knowledge of address was unknown before and known afterwards", "state of package was unopened before and opened afterwards."]}
{"id": "Order food delivery with an app|4", "answers": ["location of money was in purse before and at shop afterwards", "volume of wallet was empty before and full afterwards", "weight of shopping cart was lighter before and heavier afterwards", "step of money was in wallet before and at shop afterwards", "volume of account was emptier before and fuller afterwards", "location of cash was in wallet before and at shop afterwards."]}
{"id": "Order food delivery with an app|5", "answers": ["location of money was in purse before and at the cashier afterwards", "volume of cashier's pocket was empty before and filled with cash afterwards", "electric conductivity of phone was turned off before and turned on afterwards", "location of money was in purse before and at the cashier afterwards", "location of driver was at home before and at the store afterwards", "state of call was unmade before and made afterwards."]}
{"id": "Order food delivery with an app|6", "answers": ["volume of cart was empty before and full afterwards", "location of plate was in box before and on table afterwards", "weight of bag was heavy before and light afterwards", "volume of cart was empty before and full afterwards", "container of plate was empty before and picked up afterwards", "location of food was on the table before and in the cart afterwards", "fullness of stomach was less full before and more full afterwards", "cleanness of cart was clean before and dirty afterwards", "state of cart was empty before and full afterwards."]}
{"id": "Take domestic flights|1", "answers": ["location of airline was away before and in airport afterwards", "cost of airline ticket was on sale in store before and purchased from store afterwards", "location of book was in the bag before and on the table afterwards"]}
{"id": "Take domestic flights|2", "answers": ["knowledge of time was earlier before and later afterwards", "location of arrival was in person before and at airport afterwards", "time of departure was evening before and early morning afterwards", "time of departure was evening before and afternoon afterwards", "location of luggage was on table before and in luggage afterwards", "knowledge of time was earlier before and later afterwards", "readiness of door was closed before and open afterwards."]}
{"id": "Take domestic flights|3", "answers": ["location of ink was in pen before and on paper afterwards", "ownership of napkin was owned by the store before and owned by the shopper afterwards", "state of airline account was closed before and opened afterwards", "state of paper was blank before and holding a blank page afterwards", "location of traveler was at home before and at the airport afterwards", "action of hand was still before and moving back and forth afterwards", "knowledge of airport screening was untested before and tested afterwards"]}
{"id": "Take domestic flights|4", "answers": ["bag content of bags was opened before and checked afterwards", "state of luggage was opened before and closed afterwards", "step of bags was unchecked before and checked afterwards", "location of bag was in the checked bag before and in the hand afterwards."]}
{"id": "Take domestic flights|5", "answers": ["state of bag was opened before and closed afterwards", "state of security was unfound before and found afterwards", "step of airport security was incomplete before and complete afterwards."]}
{"id": "Take domestic flights|6", "answers": ["movement of person was stationary before and walking afterwards", "color of screen was black before and white afterwards", "state of yellow was visible before and green afterwards", "location of bag was on the table before and held in hands afterwards."]}
{"id": "Take domestic flights|7", "answers": ["movement of passenger was still before and moving afterwards", "ownership of plane was owned by the airline before and owned by the passenger afterwards", "availability of plane was occupied before and empty afterwards", "weight of bag was heavy before and light afterwards", "composition of group was calling for departure before and calling for a seat afterwards", "sound of plane was quiet before and noisy with people outside afterwards", "organization of airport was unoccupied before and occupied afterwards", "state of person was pushing doorbell before and pushing doorbell afterwards", "knowledge of door was shut before and open afterwards", "state of passenger was inside before and outside afterwards", "sound of gate was quiet before and loud afterwards", "position of luggage was up before and down afterwards."]}
{"id": "Take domestic flights|8", "answers": ["pressure of breathing was heavy before and loose afterwards", "position of seat was occupied before and empty afterwards", "location of person was on the floor before and in the plane afterwards", "brightness of screen was dark before and bright afterwards", "fullness of bag was emptier before and fuller afterwards", "action of person was standing before and sitting afterwards", "location of seat was occupied before and empty afterwards"]}
{"id": "Take domestic flights|9", "answers": ["location of luggage was on the ground before and in the bags afterwards", "fullness of bag was empty before and full afterwards", "orientation of person was standing before and sitting afterwards", "weight of plane was heavier before and lighter afterwards", "location of luggage was on the table before and in the bags afterwards", "location of person was inside the airport before and outside the airport afterwards", "step of plane lands was unready to board before and ready to board afterwards", "weight of plane was heavier before and lighter afterwards", "location of the person was outside the airport before and inside the airport afterwards."]}
{"id": "Take domestic flights|10", "answers": ["location of person was outside of bag before and inside of bag afterwards", "location of person was on the floor before and in the bag afterwards", "location of bag was on the table before and in the person's hand afterwards", "location of the bag was being held before and exiting the plane afterwards", "status of person was in the departure lounge before and exiting the lounge afterwards", "ownership of gate was owned by the airline before and bought by you afterwards", "fullness of luggage was empty before and full afterwards", "fullness of hand was empty before and full afterwards."]}
{"id": "Take domestic flights|11", "answers": ["location of airline was at door before and at door and compartment afterwards", "movement of person was holding door before and exiting afterwards", "location of person was in the front seat before and in the back seat afterwards", "location of the person was outside the plane before and inside the plane afterwards", "fullness of front seat was empty before and full afterwards", "weight of the plane was heavier before and lighter afterwards", "position of body was standing before and sitting afterwards", "fullness of front seat was empty before and full afterwards", "location of person was outside the plane before and inside the plane afterwards", "weight of the plane was heavier before and lighter afterwards", "location of food was in the fridge before and in the bags afterwards."]}
{"id": "Stay at a hotel|1", "answers": ["state of hotel was unavailable before and available afterwards", "location of hotel was online before and in inventory afterwards", "location of computer was missing before and found afterwards", "state of hotel door was closed before and open afterwards", "money amount of hotel was poor before and rich afterwards", "knowledge of computer was uninformative before and informative afterwards", "electric conductivity of computer was turned off before and turned on afterwards", "location of money was in wallet before and in hotel register afterwards", "state of hotel door was closed before and opened afterwards."]}
{"id": "Stay at a hotel|2", "answers": ["location of reservation was missing before and made afterwards", "ownership of hotel website was unpurchased before and purchased afterwards", "electric conductivity of room was turned off before and turned on afterwards", "state of hotel website was unaccessed before and accessed afterwards", "state of cheque was due before and paid for afterwards", "location of hotel was missing for appointment before and present for appointment afterwards", "volume of hotel cash register was empty before and filled with hotels' cash afterwards", "state of hotel phone line was ringing before and idle afterwards."]}
{"id": "Stay at a hotel|3", "answers": ["location of bag was in the hotel register before and at the hotel` hotel` afterwards", "state of room was unarranged before and arranged afterwards", "electric conductivity of hotel door was turned off before and turned on afterwards", "state of person was entering the hotel lobby before and leaving the hotel lobby afterwards", "availability of hotel door was open before and closed afterwards."]}
{"id": "Stay at a hotel|4", "answers": ["state of door was closed before and open afterwards", "state of door was locked before and unlocked afterwards", "position of desk was being cleaned up before and being moved forward afterwards", "state of room was secure before and accessed afterwards", "step of front desk was being cleaned up before and being moved forward afterwards"]}
{"id": "Stay at a hotel|5", "answers": ["location of key was in the drawer before and pressed into the lock box afterwards", "state of door was open before and closed afterwards", "orientation of door was opened before and closed afterwards", "state of room was unlocked before and locked afterwards", "location of person was standing before and sitting in front of the door afterwards."]}
{"id": "Stay at a hotel|6", "answers": ["location of food was missing before and served afterwards", "state of room was idle before and being used afterwards", "color of screen was black before and colored afterwards", "consumption of bandwidth was less available before and more available afterwards", "location of food was in car before and in hotel lobby afterwards", "state of room was being used before and purchased afterwards", "electric conductivity of hotel was turned off before and turned on afterwards."]}
{"id": "Stay at a hotel|7", "answers": ["container of door was closed before and opened afterwards", "location of hotel was at the entrance before and in the back afterwards", "orientation of head was leaning forward before and tilted backward afterwards."]}
{"id": "Project computer screen with an HDMI cable|1", "answers": ["power of computer was off before and on afterwards", "state of computer was off before and on afterwards", "orientation of knob was in the off position before and in the on position afterwards", "state of computer was off before and on afterwards", "step of computer was off before and on afterwards."]}
{"id": "Project computer screen with an HDMI cable|2", "answers": ["state of monitor was off before and on afterwards", "brightness of screen was dark before and bright afterwards", "power of monitor was off before and on afterwards", "brightness of monitor was dark before and bright afterwards", "orientation of monitor knob was in the off position before and in the on position afterwards", "state of monitor was off before and on afterwards", "brightness of screen was dark before and lit up afterwards."]}
{"id": "Project computer screen with an HDMI cable|3", "answers": ["power of monitor was off before and on afterwards", "orientation of monitor was vertical before and horizontal afterwards", "location of mouse cursor was in inventory before and in hand afterwards"]}
{"id": "Project computer screen with an HDMI cable|4", "answers": ["state of monitor was unconnected before and connected afterwards", "connection of monitor was unconnected before and connected afterwards", "electric conductivity of monitor was turned off before and turned on afterwards", "state of computer was disconnected before and connected afterwards", "electric conductivity of monitor was turned off before and turned on afterwards", "electric conductivity of monitor was turned off before and connected afterwards."]}
{"id": "Project computer screen with an HDMI cable|5", "answers": ["state of screen was turned off before and turned on afterwards", "power of monitor was off before and on afterwards", "power of monitor was off before and on afterwards", "state of setting for monitor was unchecked before and checked afterwards", "power of monitor was off before and on afterwards."]}
{"id": "Start a YouTube channel|1", "answers": ["There will be no change."]}
{"id": "Start a YouTube channel|2", "answers": ["organization of channel was random before and named afterwards", "state of name was unwritten before and written afterwards", "state of channel was unmade before and made afterwards", "organization of channel was written before and written afterwards", "knowledge of name was unselected before and selected afterwards", "state of channel was unwritten before and written afterwards."]}
{"id": "Start a YouTube channel|3", "answers": ["step of google account was missing before and registered afterwards", "state of account was missing before and created afterwards", "state of account was unregistered before and registered afterwards", "state of account was unregistered before and registered afterwards."]}
{"id": "Start a YouTube channel|4", "answers": ["state of channel was unmade before and created afterwards", "state of channel was absent before and created afterwards", "state of google account was missing before and present afterwards", "creation of channel was uncreated before and created afterwards."]}
{"id": "Start a YouTube channel|5", "answers": ["cost of art was on sale in store before and purchased from store afterwards", "state of account was unprocured before and procured afterwards", "color of page was bare before and decorated afterwards", "state of url was on google before and added to main page afterwards", "location of ad space was missing before and present afterwards", "location of google ad space was missing before and present afterwards", "state of video was uncut before and cut afterwards."]}
{"id": "Start a YouTube channel|6", "answers": ["step of first video was unposted before and uploaded afterwards", "state of video was absent before and uploaded afterwards", "state of image was absent before and uploaded afterwards."]}
{"id": "Start a YouTube channel|7", "answers": ["state of person was unfollowing others before and following others afterwards"]}
{"id": "Start a YouTube channel|8", "answers": ["state of developer was inactive before and watching afterwards", "state of player was idling before and watching afterwards."]}
{"id": "Make tea with tea bags|1", "answers": ["temperature of water was cold before and hot afterwards", "temperature of water was cold before and boiling afterwards", "state of water faucet was off before and on afterwards", "electric conductivity of stove burner was off before and on afterwards", "temperature of kettle was cool before and hot afterwards", "state of stove was off before and on afterwards", "temperature of water was cold before and hot afterwards", "power of stove was off before and on afterwards", "temperature of water was cold before and hot afterwards", "moisture of pot was dry before and wet afterwards", "temperature of stove top was cool before and hot afterwards", "temperature of water was cold before and hot afterwards", "temperature of pot was cold before and hot afterwards", "temperature of water was cool before and hot afterwards", "temperature of water was cool before and hot afterwards", "wetness of pot was dry before and wet afterwards."]}
{"id": "Make tea with tea bags|2", "answers": ["position of mug was empty before and holding tea bag in hand afterwards", "weight of mug was lighter before and heavier afterwards", "moisture of tea bag was dry before and wet afterwards", "cleanness of mug was clean before and dirty afterwards", "temperature of tea bag was cold before and hot afterwards", "location of mug was in cupboard before and in hand afterwards", "fullness of mug was empty before and full afterwards", "location of tea bag was in a package before and in a mug afterwards", "temperature of mug was room temperature before and hot afterwards", "temperature of cupboard was warm before and hot afterwards", "wetness of mug was dry before and wet afterwards."]}
{"id": "Make tea with tea bags|3", "answers": ["form of tea was uncarbonated before and carbonated afterwards", "state of mug was empty before and holding water afterwards", "wetness of mug was dry before and wet afterwards", "temperature of water was cooler before and boiling afterwards", "cleanness of mug was clean before and covered in water afterwards", "temperature of mug was room temperature before and hot afterwards", "weight of mug was lighter before and heavier afterwards", "wetness of mug was dry before and wet afterwards", "temperature of kettle was cold before and hot afterwards", "cleanness of hand was clean before and covered in water afterwards", "volume of mug was empty before and full afterwards", "location of water was in the kettle before and in the mug afterwards."]}
{"id": "Make tea with tea bags|4", "answers": ["location of tea was in a pot before and in a mug afterwards", "location of mug was in cupboard before and on counter afterwards", "temperature of mug was room temperature before and hot afterwards", "location of tea bag was in hand before and drank afterwards", "state of person was idle before and drinking tea afterwards."]}
{"id": "Install a game on PS5|1", "answers": ["location of person was at home before and at the store afterwards."]}
{"id": "Install a game on PS5|2", "answers": ["knowledge of game was unselected before and selected afterwards", "ownership of game was unpurchased before and purchased afterwards", "state of the game was unchosen before and chosen afterwards."]}
{"id": "Install a game on PS5|3", "answers": ["step of game was unpurchased before and purchased afterwards", "state of game was unselected before and selected afterwards", "state of game was unselected before and selected afterwards", "location of game was at the store before and at home afterwards", "knowledge of price was unknown before and known afterwards", "state of game was unselected before and selected afterwards."]}
{"id": "Install a game on PS5|4", "answers": ["step of purchase was unmade before and made afterwards", "state of game was unfinished before and finished afterwards", "state of credit card was inactive before and loaded afterwards."]}
{"id": "Install a game on PS5|5", "answers": ["state of game was uninstalled before and downloaded afterwards", "state of game was uninstalled before and installed afterwards", "step of game was on before and off afterwards", "electric conductivity of computer was turned off before and turned on afterwards", "location of game was on shelf before and in hand afterwards", "state of game was uninstalled before and installed afterwards."]}
{"id": "Schedule a virtual meeting|1", "answers": ["organization of meeting topic was unselected before and selected afterwards", "knowledge of topic was undefined before and defined afterwards", "knowledge of a topic was undecided before and decided afterwards", "step of list of meetings was unclicked before and clicked afterwards", "availability of a topic was undecided before and chosen afterwards", "knowledge of a topic was unselected before and selected afterwards."]}
{"id": "Schedule a virtual meeting|2", "answers": ["organization of meeting was unstarted before and in progress afterwards", "contact of person was ignored before and reached out afterwards", "state of meeting was thought of before and written down afterwards", "availability of a meeting was in progress before and reached afterwards", "organization of list of meeting was random before and selected afterwards."]}
{"id": "Schedule a virtual meeting|3", "answers": ["state of meeting was considered before and selected afterwards", "state of meeting was unplanned before and planned afterwards", "step of virtual meeting application was unclicked before and clicked afterwards"]}
{"id": "Schedule a virtual meeting|4", "answers": ["organization of meeting was unstarted before and in progress afterwards", "knowledge of everyone was unaware of what to do before and aware afterwards", "step of meeting information was missing before and added afterwards", "state of meeting was unclicked before and clicked afterwards."]}
{"id": "Schedule a virtual meeting|5", "answers": ["state of note was on pad before and in hand afterwards", "weight of paper was heavier before and lighter afterwards", "state of meeting was being planned before and finished afterwards", "state of meeting was unstarted before and in progress afterwards", "action of person was holding the pen before and holding the paper afterwards."]}
{"id": "Schedule a virtual meeting|6", "answers": ["state of meeting was being planned before and started afterwards", "state of meeting was being planned before and started afterwards", "state of person was waiting before and ready afterwards", "knowledge of understanding was absent before and present afterwards", "state of meeting was being planned before and started afterwards."]}
{"id": "Make scrambled eggs|1", "answers": ["temperature of pan was room temperature before and preheated afterwards", "temperature of stove dial was unturned before and turned afterwards", "state of stove top was cold before and hot afterwards", "electric conductivity of stove was turned off before and turned on afterwards", "temperature of pan was cool before and hot afterwards", "location of heat was absent before and in pan afterwards", "state of stove was cold before and hot afterwards", "temperature of oven was cold before and hot afterwards", "electric conductivity of stove was off before and on afterwards."]}
{"id": "Make scrambled eggs|2", "answers": ["temperature of bowl was room temperature before and hot afterwards", "state of mixing bowl was empty before and containing eggs and water afterwards", "color of water was clear before and brown afterwards", "moisture of bowl was dry before and wet afterwards", "cleanness of bowl was clean before and dirty afterwards", "wetness of mixing bowl was dry before and wet afterwards", "location of egg was inside the shell before and in a bowl afterwards", "temperature of bowl was room temperature before and hot afterwards."]}
{"id": "Make scrambled eggs|3", "answers": ["texture of mixture was chunky before and smoother afterwards", "moisture of bowl was dry before and wet afterwards", "cleanness of whisk was clean before and dirty afterwards", "consistency of mixture was less consistent before and more consistent afterwards", "state of mix was unmixed before and mixed afterwards", "temperature of bowl was cool before and warm afterwards", "color of mixture was white before and brown afterwards", "texture of mixture was powdery before and smooth afterwards", "color of mixture was light colored before and dark colored afterwards", "location of liquid was in bowl before and in glass afterwards", "fullness of mixing bowl was empty before and full afterwards"]}
{"id": "Make scrambled eggs|4", "answers": ["volume of the pan was empty before and fuller afterwards", "location of oil was in the bottle before and in the bowl afterwards", "temperature of pan was cool before and warm afterwards", "state of the pan was uncovered before and covered in oil afterwards", "location of oil was in a container before and in the pan afterwards", "volume of bowl was empty before and fuller afterwards", "state of pan was clean before and oily afterwards", "location of oil was in container before and in pan afterwards", "location of pan was in storage before and in use afterwards", "volume of mixing bowl was empty before and full afterwards."]}
{"id": "Make scrambled eggs|5", "answers": ["location of oil was in the bottle before and in the pan afterwards", "location of egg mixture was in bowl before and in pan afterwards", "temperature of oil was cooler before and hotter afterwards", "weight of pan was lighter before and heavier afterwards", "moisture of pan was dry before and wet afterwards", "location of egg mixture was in a bowl before and in the pan afterwards", "temperature of pan was cold before and hot afterwards", "location of oil was in bottle before and in pan afterwards."]}
{"id": "Make scrambled eggs|6", "answers": ["wetness of spoon was dry before and wetter afterwards", "state of mixing bowl was empty before and full afterwards", "speed of whisk was still before and moving rapidly afterwards", "cleanness of spoon was clean before and dirty afterwards", "state of mixing bowl was clean before and sticky afterwards", "cleanness of spoon was clean before and dirty afterwards."]}
{"id": "Make scrambled eggs|7", "answers": ["temperature of mixture was hot before and cooling afterwards", "state of egg was hot before and now cool afterwards", "location of skillet was in the cabinet before and on the countertop afterwards", "location of serving spoon was in the drawer before and on the table afterwards", "location of bowl was in the cupboard before and on the countertop afterwards"]}
{"id": "Eat at a restaurant in the US|1", "answers": ["state of the resturant was needing repaired before and ready to reuture afterwards", "location of rood was at start of reuture before and at resturant afterwards"]}
{"id": "Eat at a restaurant in the US|2", "answers": ["knowledge of size of guests was unknown before and known afterwards", "orientation of host was vague before and followed afterwards", "knowledge of player was inexperienced before and experienced afterwards", "location of arrival was far away before and near afterwards", "state of the host was untrained before and trained afterwards."]}
{"id": "Eat at a restaurant in the US|3", "answers": ["volume of table was empty before and full afterwards", "motion of body was frozen before and moving afterwards", "location of food was in fridge before and in bowl afterwards", "volume of bowl was empty before and full afterwards", "location of food was in fridge before and in bowl afterwards"]}
{"id": "Eat at a restaurant in the US|4", "answers": ["ownership of orange peel was owned by the store before and owned by the person afterwards", "location of mayo was in jar before and on bowl afterwards", "location of pineapple was in the fridge before and on the plate afterwards", "state of stomach was empty before and full afterwards", "state of host was hungry before and satisfied afterwards", "location of mango was in the fridge before and on the plate afterwards", "taste of food was bland before and tasty afterwards", "fullness of bowl was empty before and more full afterwards."]}
{"id": "Eat at a restaurant in the US|5", "answers": ["state of food was unserved before and served afterwards", "completion of task was unfinished before and finished afterwards", "state of food was ready to be served before and eaten afterwards", "location of fork was in the drawer before and in the serving dish afterwards", "completion of task was unfinished before and finished afterwards."]}
{"id": "Eat at a restaurant in the US|6", "answers": ["location of food was on the table before and in the garbage afterwards", "cleanness of table was dirty before and clean afterwards", "state of person was waiting before and cleared off afterwards"]}
{"id": "Eat at a restaurant in the US|7", "answers": ["location of bill was in wallet before and in traveler's bag afterwards", "state of credit card was untouched before and taken out afterwards", "location of cash was in wallet before and in traveler's bag afterwards", "step of food was unpaid before and paid afterwards."]}
{"id": "Eat at a restaurant in the US|8", "answers": ["location of guest was inside before and outside afterwards", "location of eater was at the restaurant before and gone afterwards", "location of your food was leaving before and now leaving afterwards", "state of eater was hungry before and full afterwards."]}
{"id": "Wash Fruit and Vegetables|1", "answers": ["state of washing machine was off before and on afterwards", "electric conductivity of washing machine was turned off before and turned on afterwards", "location of water was in pipes before and in sink afterwards"]}
{"id": "Wash Fruit and Vegetables|2", "answers": ["location of water was in pipes before and in washing cloth afterwards", "location of soap was in bottle before and in washing machine afterwards", "weight of washing machine was light before and heavy afterwards", "location of detergent was in bottle before and in washing machine afterwards", "fullness of washing machine was empty before and full afterwards", "location of water was in pipes before and in washing machine afterwards", "location of soap was in bottle before and in washing machine afterwards", "fullness of washing machine was empty before and full afterwards", "state of washing was under way before and completed afterwards"]}
{"id": "Wash Fruit and Vegetables|3", "answers": ["state of work area was bare before and covered afterwards", "location of tape was on roll before and on cloth afterwards", "moisture of cloth was dry before and wet afterwards", "state of hand was bare before and covered afterwards"]}
{"id": "Wash Fruit and Vegetables|4", "answers": ["cleanness of countertop was dirty before and clean afterwards", "cleanness of countertop was dirty before and cleaner afterwards", "cleanness of cutting board was dirty before and clean afterwards", "location of tool was in the toolbox before and in the counter afterwards", "location of wash cloth was in the sewing box before and on the counter afterwards", "wetness of counter was dry before and wet afterwards", "wetness of cutting board was dry before and wet afterwards", "weight of washing cloth was light before and heavier afterwards", "cleanness of sewing machine was clean before and dirty afterwards", "cleanness of utensil was dirty before and clean afterwards", "moisture of board was dry before and wet afterwards."]}
{"id": "Wash Fruit and Vegetables|5", "answers": ["location of water was in hose before and in residue on the counter afterwards", "moisture of countertop was dry before and wet afterwards", "state of countertop was dirty before and clean afterwards", "location of water was in the pipes before and in the bucket afterwards", "state of mix was soapy before and warm afterwards", "location of cool water was in faucet before and in drain afterwards", "state of mix was soapy before and warm afterwards", "location of salt was in carton before and in bucket afterwards", "state of mix was soapy before and warm afterwards."]}
{"id": "Wash Fruit and Vegetables|6", "answers": ["odor of produce was neutral smelling before and soapy afterwards", "location of dirt was on the countertop before and on the soap afterwards", "location of water was in pipes before and on the soap afterwards", "cleanness of produce was dirty before and clean afterwards", "cleanness of soap was soapy before and rinsed of water afterwards", "moisture of rag was dry before and wet afterwards", "cleanness of finish was dirty before and clean afterwards", "state of can was closed before and open afterwards", "moisture of soap was wet before and dry afterwards."]}
{"id": "Wash Fruit and Vegetables|7", "answers": ["moisture of plant was wet before and dry afterwards", "location of water was in the bucket before and on the countertop afterwards", "wetness of countertop was dry before and moist afterwards", "location of soap was in a container before and on the countertop afterwards", "location of soap was in a bottle before and on the countertop afterwards", "dryness of product was wet before and dry afterwards", "moisture of plant was dry before and wet afterwards", "cleanness of hand was dirty before and clean afterwards", "location of water was in the faucet before and on the countertop afterwards."]}
{"id": "Store Sweet Potato Pie|1", "answers": ["temperature of wire rack was warm before and cool afterwards", "temperature of wire rack was warm before and cool afterwards", "temperature of wire rack was room temperature before and cool afterwards", "electric conductivity of microwave was off before and on afterwards", "temperature of pie was room temperature before and cool afterwards", "temperature of wire rack was cold before and warming afterwards", "state of wire rack was empty before and full afterwards", "temperature of wire rack was room temperature before and cool afterwards", "location of pie was on wire rack before and on counter afterwards."]}
{"id": "Store Sweet Potato Pie|2", "answers": ["location of plastic wrap was on roll before and around pie pan afterwards", "state of pie pan was bare before and wrapped afterwards", "wrapping of pie pan was ungathered before and wrapped afterwards", "state of wire rack was bare before and wrapped afterwards", "location of plastic wrap was on roll before and on pie pan afterwards", "state of pan was open before and covered afterwards", "volume of plastic wrap container was full before and empty afterwards", "shape of wire was balled up before and wrapped around pie pan afterwards", "openness of plastic wrap was closed before and open afterwards."]}
{"id": "Store Sweet Potato Pie|3", "answers": ["location of foil was on roll before and around pie pan afterwards", "location of foil was in box before and on pie pan afterwards", "thickness of pie pan was bare before and covered with foil afterwards", "thickness of pie pan was bare before and wrapped afterwards", "state of pie pan was open before and covered afterwards", "state of foil was flat before and wrapped afterwards", "location of foil was on roll before and around pie pan afterwards", "openness of plastic wrap was closed before and open afterwards."]}
{"id": "Store Sweet Potato Pie|4", "answers": ["weight of freezer was less full before and more full afterwards", "location of pie pan was on counter before and in freezer afterwards", "temperature of pie was cold before and warm afterwards", "state of pie was frozen before and is thawed afterwards", "location of pie pan was in the pantry before and on the table afterwards", "location of freezer door was closed before and open afterwards", "temperature of pie was room temperature before and cold afterwards."]}
{"id": "Store Fresh Mushrooms|1", "answers": ["state of mushroom was solid before and mushy afterwards", "state of mushroom was exposed before and covered afterwards", "location of mushroom was in packet before and on counter afterwards", "cleanness of mushroom was dirty before and clean afterwards", "state of mushroom was covered in black stuff before and clean afterwards", "location of cap was on mushroom before and off mushroom afterwards", "viability of mushroom was alive before and dead afterwards", "cleanness of mushroom was dirty before and clean afterwards."]}
{"id": "Store Fresh Mushrooms|2", "answers": ["cleanness of mushroom was dirty before and clean afterwards", "state of the mushroom was covered in dirt before and brushing afterwards", "cleanness of mushroom brush was clean before and dirty afterwards", "fullness of towel or mushroom brush was empty before and full afterwards", "state of brush was empty before and full of mushroom afterwards", "cleanness of mushroom was dirty before and cleaner afterwards", "location of mushroom was on counter before and in hand afterwards", "location of mushroom was in the fridge before and in the hand afterwards", "location of brush was off the mushroom before and on the mushroom afterwards", "state of brush was empty before and full of mushroom afterwards."]}
{"id": "Store Fresh Mushrooms|3", "answers": ["texture of mushroom was whole before and sliced afterwards", "wholeness of mushroom was whole before and sliced afterwards", "cleanness of brush was clean before and dirty afterwards", "wholeness of mushroom was whole before and sliced afterwards", "moisture of knife was dry before and wet afterwards", "state of mushroom was uncut before and cut afterwards", "state of mushroom was whole before and sliced afterwards", "cleanness of grinder was clean before and dirty afterwards", "moisture of cutting board was dry before and wet afterwards", "cleanness of mushroom was dirty before and clean afterwards", "moisture of knife was dry before and wet afterwards", "location of mushroom was in package before and on counter afterwards."]}
{"id": "Store Fresh Mushrooms|4", "answers": ["age of mushroom was fresh before and frozen afterwards", "temperature of mushroom was warm before and cool afterwards", "temperature of mushroom was room temperature before and cool afterwards", "power of microwave was off before and on afterwards", "state of mushroom was raw before and cooked afterwards", "texture of mushroom was hard before and soft afterwards", "temperature of mushroom was hot before and cold afterwards", "hardness of mushroom was hard before and soft afterwards", "fullness of microwave was empty before and full afterwards", "temperature of mushroom was room temperature before and cooler afterwards", "temperature of mushroom was warm before and cold afterwards", "electric conductivity of microwave was turned off before and turned on afterwards", "state of mushroom was raw before and cooked afterwards", "hardness of mushroom was hard before and soft afterwards."]}
{"id": "Store Fresh Mushrooms|5", "answers": ["state of mushroom was on counter before and removed afterwards", "location of mushroom was in pan before and in bag afterwards", "location of mushroom was on counter before and in bag afterwards", "weight of plastic bag was lighter before and heavier afterwards", "temperature of mushroom was warm before and cold afterwards", "location of mushroom was on counter before and in bag afterwards", "shape of mushroom was whole before and sliced afterwards", "state of bag was empty before and full afterwards", "volume of pan was full before and empty afterwards", "hardness of mushroom was hard before and soft afterwards", "weight of mushroom bag was light before and heavier afterwards", "hardness of mushroom was hard before and soft afterwards", "volume of bag was empty before and full afterwards."]}
{"id": "Grind coffee beans|1", "answers": ["fullness of bucket was empty before and full afterwards", "wetness of wetter jar was dry before and wet afterwards", "volume of the jar was less full before and fuller afterwards", "location of water was in the faucet lines before and in the jar afterwards", "wetness of jar was dry before and wet afterwards", "weight of the jar was lighter before and heavier afterwards", "wetness of the jar was dryer before and wetter afterwards", "cleanness of the jar was clean before and dirty afterwards."]}
{"id": "Grind coffee beans|2", "answers": ["location of water was in faucet before and in jar afterwards", "sealing of jar was unsealed before and sealed afterwards", "openness of lid was closed before and open afterwards", "state of jar was open before and closed afterwards", "wetness of jar was dry before and wet afterwards", "fullness of bowl was full before and empty afterwards", "location of water was in pipes before and in jar afterwards", "wetness of jar was dry before and wet afterwards", "temperature of jar was room temperature before and hot afterwards", "wetness of jar was dry before and wet afterwards."]}
{"id": "Grind coffee beans|3", "answers": ["openness of jar was closed before and open afterwards", "location of coffee bag was in hand before and in the jar afterwards", "container of coffee bag was empty before and sealed afterwards", "openness of coffee bean bag was open before and closed afterwards", "position of lid was up before and down afterwards", "state of jar was open before and closed afterwards", "fullness of coffee bean bag was empty before and full afterwards"]}
{"id": "Grind coffee beans|4", "answers": ["openness of lid was closed before and open afterwards", "state of jar was closed before and open afterwards", "orientation of lid was closed before and open afterwards", "location of grinder was in toolbox before and in open jar afterwards", "orientation of grinder was still before and turning to the side afterwards."]}
{"id": "Grind coffee beans|5", "answers": ["volume of grinder was empty before and full afterwards", "state of grinder was empty before and full of beans afterwards", "moisture of coffee bean bag was dry before and wet afterwards."]}
{"id": "Grind coffee beans|6", "answers": ["power of grinder was off before and on afterwards", "moisture of grinder was dry before and wet afterwards", "composition of coffee was sitting there before and being mixed with grinder afterwards", "volume of jar was empty before and full afterwards."]}
{"id": "Grind coffee beans|7", "answers": ["volume of grinder was full before and empty afterwards", "power of grinder was off before and on afterwards", "volume of coffee bean bag was full of beans before and emptied afterwards", "power of grind was off before and on afterwards", "state of grinder knob was down before and up afterwards", "movement of grind was still before and spinning afterwards", "state of grinder was unused before and used afterwards"]}
{"id": "Grind coffee beans|8", "answers": ["pressure of finger was relaxed before and gripped afterwards", "movement of knob was still before and in motion afterwards", "state of grind was off before and on afterwards", "location of button was in hand before and pressed on afterwards", "openness of grind knob was closed before and open afterwards."]}
{"id": "Grind coffee beans|9", "answers": ["state of knob was in use before and set afterwards", "movement of grinder was still before and moving afterwards", "speed of grinder was still before and in motion afterwards"]}
{"id": "Grind coffee beans|10", "answers": ["state of lid was closed before and open afterwards", "orientation of grind knob was in the off position before and in the on position afterwards", "state of the lid was closed before and now open afterwards."]}
{"id": "Grind coffee beans|11", "answers": ["volume of jar was empty before and full afterwards", "location of coffee was in grinder before and in jar afterwards", "volume of grinder was full before and empty afterwards", "location of coffee was in jar before and in jar afterwards", "orientation of lid was open before and closed afterwards."]}
{"id": "Grind coffee beans|12", "answers": ["fullness of jar was less full before and more full afterwards", "sealing of lid was unsealed before and sealed afterwards", "state of jar was open before and sealed afterwards", "state of jar was open before and closed afterwards."]}
{"id": "Grind coffee beans|13", "answers": ["volume of jar was empty before and full afterwards", "location of coffee was in grinder before and in jar afterwards", "location of lid was off the grinder before and on the grinder afterwards", "shape of coffee was in a ball before and crumpled afterwards."]}
{"id": "Grind coffee beans|14", "answers": ["shape of coffee bean bag was open before and sealed afterwards", "openness of bean bag was open before and closed afterwards", "state of coffee bag was unsealed before and sealed afterwards."]}
{"id": "Make coffee expresso|1", "answers": ["power of machine was off before and on afterwards", "temperature of engine was cold before and warm afterwards", "temperature of temp was cold before and warm afterwards", "electric conductivity of expresso machine was turned off before and turned on afterwards", "power of timer was off before and running afterwards", "temperature of motor was cold before and hot afterwards", "power of car power was off before and on afterwards."]}
{"id": "Make coffee expresso|2", "answers": ["power of expresso was off before and on afterwards", "electric conductivity of the machine was turned off before and turned on afterwards", "electric conductivity of power was off before and on afterwards", "state of machine was off before and on afterwards", "temperature of the machine was cold before and hot afterwards", "electric conductivity of stove was turned off before and turned on afterwards."]}
{"id": "Make coffee expresso|3", "answers": ["state of container was closed before and open afterwards", "container of container was empty before and full afterwards", "orientation of container was in the corner before and touching the ground afterwards", "power of expresso machine was off before and on afterwards", "state of the container was empty before and filled with coffee afterwards", "state of coffee container was dry before and full afterwards", "state of container was empty before and full afterwards."]}
{"id": "Make coffee expresso|4", "answers": ["moisture of coffee was wet before and drier afterwards", "location of coffee was in container before and in mug afterwards", "orientation of container was empty before and full afterwards", "coffee of coffee was inside the container before and poured to portafilter afterwards", "coffee of coffee was in the container before and in the mug afterwards."]}
{"id": "Make coffee expresso|5", "answers": ["location of cup was under the coffee before and under the coffee afterwards", "location of cup was under coffee before and under portafilter afterwards", "fullness of portafilter was empty before and full afterwards", "openness of cup was open before and closed afterwards."]}
{"id": "Make coffee expresso|6", "answers": ["electric conductivity of coffee was dark before and light afterwards", "state of portafilter was empty before and full afterwards."]}
{"id": "Make coffee expresso|7", "answers": ["state of machine to expresso was unlit before and lit afterwards", "mode of machine was to make coffee before and to make coffee with a cup afterwards", "electric conductivity of power was off before and on afterwards", "power of expresso mode was off before and on afterwards", "state of coffee was to be made before and manufactured afterwards", "location of cup was under the portafilter before and under the machine afterwards", "step of the machine to expresso mode was unlit before and lit afterwards."]}
{"id": "Make coffee expresso|8", "answers": ["state of coffee machine was in use before and set to produce mode afterwards", "state of machine was in expresso mode before and stop producing mode afterwards", "scheduling of coffee was withheld before and sipped afterwards."]}
{"id": "Make coffee expresso|9", "answers": ["state of the machine was powered off before and powered on afterwards", "electric conductivity of coffee machine was turned off before and turned on afterwards", "electric conductivity of expresso machine was turned off before and turned on afterwards", "electric conductivity of coffee machine was powered off before and powered on afterwards."]}
{"id": "Bath your dog|1", "answers": ["knowledge of setting was random before and set afterwards", "motion of water was still before and boiling afterwards", "temperature of setting was unset before and set afterwards", "temperature of water was cold before and warm afterwards", "knowledge of setting was undefined before and defined afterwards", "motion of water was still before and bubbling afterwards", "temperature of temperature was unmeasured before and measured afterwards."]}
{"id": "Bath your dog|2", "answers": ["location of water was in faucet before and in dog's mouth afterwards", "wetness of dog was dry before and wet afterwards", "state of water was off before and on afterwards", "wetness of dog was dry before and wet afterwards", "wetness of pool was dry before and wet afterwards", "temperature of water was cold before and hot afterwards", "temperature of dog was cool before and hot afterwards", "wetness of body was dry before and wet afterwards", "location of water was in kettle before and in dog's mouth afterwards."]}
{"id": "Bath your dog|3", "answers": ["location of water was in faucet before and in dog's mouth afterwards", "location of water was in the bottle before and on the dog's skin afterwards", "moisture of dog's hair was dry before and wet afterwards", "location of water was in the faucet before and on the dog afterwards", "fullness of bottle was more full before and less full afterwards", "odor of dog's mouth was neutral smelling before and smelling like vinegar afterwards", "location of water was in bottle before and on dog's body afterwards", "location of water was in faucet before and in dog's hair afterwards", "location of bottle was in the pantry before and on the table afterwards", "wetness of dog's skin was dry before and wet afterwards", "location of vinegar was in bottle before and on dog's hair afterwards."]}
{"id": "Bath your dog|4", "answers": ["location of fur was on dog before and in drain afterwards", "odor of dog was scent free before and filled with water afterwards", "location of dog was inside basin before and outside basin afterwards", "state of fur was visible before and rinsed afterwards", "location of water was in the dog's faucet before and down the drain afterwards", "moisture of dog was dry before and wet afterwards", "location of dog was on floor before and in drain afterwards", "location of soap was in bottle before and on dog afterwards", "wetness of dog was dry before and wet afterwards", "location of dog's hair was on dog before and in drain afterwards", "moisture of dog was dry before and wet afterwards", "location of soap was in bottle before and on dog afterwards", "location of water was in hose before and down drain afterwards", "location of water was in faucet before and in dog afterwards."]}
{"id": "Bath your dog|5", "answers": ["location of dog was in water before and in bag afterwards", "wetness of dog was wet before and dry afterwards", "location of dog was on carpet before and in bag afterwards", "wetness of dog was wet before and dry afterwards", "location of water was in the faucet before and on the dog afterwards", "odor of dog was strong smelling before and plain smelling afterwards", "wetness of dog was wet before and dry afterwards", "location of dog's mouth was on the water before and closed afterwards."]}
{"id": "Bath your dog|6", "answers": ["location of treat was in bottle before and in dog's mouth afterwards", "location of treat was in bag before and in dog's mouth afterwards", "wetness of dog was dry before and wet afterwards", "location of treat was in the bottle before and in the dog's mouth afterwards", "fullness of bottle was full before and partway empty afterwards", "location of treat was in the bottle before and in the dog's mouth afterwards."]}
{"id": "Clean toilet bowl|1", "answers": ["location of soap was in bottle before and in toilet afterwards", "cleanness of toilet was dirty before and clean afterwards", "fullness of toilet was less full before and more full afterwards", "moisture of toilet was dry before and wet afterwards", "wetness of toilet was dry before and wet afterwards", "location of water was in pipes before and in toilet afterwards", "odor of mixture was odorless before and stinky afterwards", "location of soap was in bottle before and in toilet afterwards", "location of water was in faucet before and in drain afterwards", "state of toilet was dirty before and cleaned afterwards", "odor of mixture was odorless before and stinky afterwards", "temperature of mixture was warm before and cool afterwards."]}
{"id": "Clean toilet bowl|2", "answers": ["cleanness of the spoon was clean before and dirty afterwards", "location of the bleach was in the bottle before and in the bowl afterwards", "volume of the bowl was less full before and fuller afterwards", "temperature of bowl was room temperature before and cool afterwards", "fullness of bowl was empty before and full afterwards", "weight of the bowl was lighter before and heavier afterwards", "weight of bleach bottle was heavier before and lighter afterwards", "fullness of bleach bottle was more full before and less full afterwards", "temperature of bowl was room temperature before and cool afterwards", "location of mixture was in the bottle before and in the bowl afterwards", "weight of bleach bottle was heavier before and lighter afterwards", "moisture of bowl was dry before and wet afterwards", "location of mixture was in bottle before and in bowl afterwards", "volume of bowl was empty before and full afterwards", "temperature of mixture was cooler before and warmer afterwards."]}
{"id": "Clean toilet bowl|3", "answers": ["state of bowl was smeared before and scrubbed afterwards", "location of brush was absent before and present afterwards", "location of toilet brush was in storage before and in use afterwards", "cleanness of toilet was dirty before and clean afterwards", "color of toilet was light colored before and dark afterwards", "moisture of brush was dry before and wet afterwards", "location of thread was in a box before and in the toilet afterwards", "state of bowl was stained before and brightened afterwards", "cleanness of toilet brush was clean before and dirty afterwards", "location of water was in faucet before and in bowl afterwards", "wetness of bowl was dry before and wet afterwards", "cleanness of bowl was dirty before and clean afterwards", "moisture of toilet was dry before and wet afterwards", "moisture of cloth was dry before and wet afterwards", "cleanness of wall was dirty before and clean afterwards."]}
{"id": "Clean toilet bowl|4", "answers": ["There will be no change."]}
{"id": "Clean toilet bowl|5", "answers": ["cleanness of toilet was dirty before and clean afterwards", "wetness of toilet was dry before and wet afterwards", "moisture of drain was dry before and wet afterwards", "volume of bowl was full before and empty afterwards", "state of water was still before and boiling afterwards", "temperature of water was cold before and hot afterwards", "color of toilet was discolored before and flushed afterwards", "cleanness of toilet was dirty before and clean afterwards", "location of toilet was on counter before and in hand afterwards."]}
{"id": "Dispose of Dog Poop|1", "answers": ["state of dog was pungent before and gasping for air afterwards", "location of poo was on the dog before and in the trash afterwards", "cleanness of dog poop was on the dog before and picked up afterwards", "location of dog poop was on floor before and in hand afterwards", "volume of dog poo bottle was full before and emptier afterwards", "state of dog poo was liquid before and solid afterwards", "scent of dog was neutral before and scented afterwards."]}
{"id": "Dispose of Dog Poop|2", "answers": ["location of dog poop was on the floor before and in the garbage afterwards", "weight of plastic bag was light before and heavy afterwards", "fullness of dog poop bag was empty before and full afterwards", "location of dog poop was on the floor before and in the bag afterwards", "wetness of plastic bag was dry before and wet afterwards", "weight of dog poop bag was light before and heavy afterwards", "fullness of dog poop bag was empty before and full afterwards", "location of dog poop was on the floor before and in the bag afterwards", "location of dog poop was in a bag before and in the trash afterwards", "composition of dog poop bag was dry before and covered in poo afterwards", "cleanness of plastic bag was clean before and dirty afterwards", "fullness of bag was empty before and full of poo afterwards", "volume of plastic bag was empty before and full afterwards."]}
{"id": "Dispose of Dog Poop|3", "answers": ["location of dog poop was on the floor before and in the bag afterwards", "location of dog poop was on the floor before and in bag afterwards", "length of dog poop was in one piece before and tied up afterwards", "fullness of bag was empty before and more full afterwards", "weight of bag was light before and heavy afterwards", "location of dog poop was on the floor before and in the bag afterwards", "location of dog poop was in plastic bag before and in bag afterwards", "state of bag was open before and closed afterwards", "length of dog poop was in one piece before and tied up afterwards", "location of dog poop was outside of bag before and inside bag afterwards", "composition of bag was open before and closed afterwards", "volume of bag was empty before and full afterwards."]}
{"id": "Dispose of Dog Poop|4", "answers": ["location of bag was in box before and in hand afterwards", "volume of trash can was empty before and full afterwards", "location of dog poop was in bag before and in container afterwards", "location of dog poop was outside of bag before and inside of bag afterwards", "emptiness of bag was empty before and full afterwards", "weight of trash can was light before and heavier afterwards", "location of bag was in hands before and in trash afterwards", "cleanness of dog poop was dirty before and clean afterwards", "location of dog poop was on dog before and in trash afterwards", "state of can was closed before and open afterwards."]}
{"id": "Dispose of Dog Poop|5", "answers": ["location of dog vomit was on the dog before and in the trash afterwards", "location of dog wash was at the dog's house before and in the backyard afterwards"]}
{"id": "Clean and sanitize a cutting board|1", "answers": ["wetness of board was dry before and wet afterwards", "cleanness of spoon was clean before and dirty afterwards", "dryness of deck was dry before and wet afterwards", "wetness of the sponge was dry before and wet afterwards", "location of water was in the bucket before and on the board afterwards", "cleanness of deck was dirty before and clean afterwards", "cleanness of the board was dirty before and clean afterwards", "cleanness of scrub sponge was clean before and dirty afterwards", "location of water was in faucet before and in bowl afterwards", "cleanness of the sponge was clean before and dirty afterwards", "wetness of the board was dry before and wet afterwards."]}
{"id": "Clean and sanitize a cutting board|2", "answers": ["wetness of board was wet before and dry afterwards", "wetness of the sponge was wetter before and drier afterwards", "wetness of the board was wetter before and drier afterwards", "wetness of sponge was wet before and dry afterwards", "moisture of board was wet before and dry afterwards", "wetness of the sponge was wetter before and drier afterwards."]}
{"id": "Clean and sanitize a cutting board|3", "answers": ["location of vinegar was in a bottle before and on the board afterwards", "state of board was dirty before and clean afterwards", "odor of board was bland smelling before and spicy smelling afterwards", "composition of vinegar was in bottle before and on board afterwards", "cleanness of cutting board was dirty before and clean afterwards", "cleanness of cutting board was dirty before and clean afterwards", "state of vinegar was in bottle before and on board afterwards", "texture of board was dry before and wet afterwards", "cleanness of board was dirty before and clean afterwards", "state of vinegar was in a container before and on the board afterwards", "moisture of board was wet before and dry afterwards", "cleanness of board was dirty before and clean afterwards", "location of vinegar was in a bottle before and on the board afterwards", "moisture of knife was dry before and wet afterwards."]}
{"id": "Clean and sanitize a cutting board|4", "answers": ["wetness of board was wet before and dry afterwards", "moisture of board was wet before and dry afterwards", "location of vinegar was in a bottle before and on the board afterwards", "temperature of air was hot before and cool afterwards", "state of the board was wet before and dry afterwards", "location of vinegar was in bottle before and on board afterwards", "temperature of cutting board was room temperature before and cool afterwards", "cleanness of board was dirty before and clean afterwards", "moisture of board was wet before and dry afterwards."]}
{"id": "Fly a Dual Line Kite|1", "answers": ["composition of kite was separated before and attached afterwards", "size of piece of wood was larger before and smaller afterwards", "location of kite was in store before and in your hands afterwards", "organization of kite was together before and separated afterwards."]}
{"id": "Fly a Dual Line Kite|2", "answers": ["distance of kite was away from wind before and toward wind afterwards", "location of back was bent before and straight afterwards", "orientation of person was standing straight before and bent afterwards", "orientation of person was horizontal before and vertical afterwards", "location of kite was loose before and inside afterwards"]}
{"id": "Fly a Dual Line Kite|3", "answers": ["distance of kite was closer before and farther away afterwards", "location of kite was in the hand before and walking backward afterwards"]}
{"id": "Fly a Dual Line Kite|4", "answers": ["orientation of body was leaning forward before and straight afterwards", "pressure of hand was loose before and gripped afterwards."]}
{"id": "Fly a Dual Line Kite|5", "answers": ["location of kite was on the ground before and in the air afterwards", "location of line was behind the person before and away from the person afterwards", "location of line was on ground before and lifted up afterwards", "location of kite was in hand before and on ground afterwards."]}
{"id": "Place a Coin in the Door Hinge|1", "answers": ["ownership of coin was in bag before and in your bag afterwards", "location of coin was in your bag before and in the ring afterwards", "orientation of person was empty handed before and holding the coin afterwards", "state of your bag was empty before and now full afterwards", "location of coin was in bag before and in ring afterwards."]}
{"id": "Place a Coin in the Door Hinge|2", "answers": ["volume of door was closed before and open afterwards", "state of door was closed before and open afterwards", "location of coin was in your bag before and in the room afterwards", "state of door was closed before and open afterwards."]}
{"id": "Place a Coin in the Door Hinge|3", "answers": ["location of coin was outside hinge before and inside hinge afterwards", "location of coin was outside the hinge before and inside the hinge afterwards", "location of the coin was outside the hinge before and inside the hinge afterwards", "location of coin was loose before and in hinge afterwards", "state of hinge was closed before and open afterwards."]}
{"id": "Place a Coin in the Door Hinge|4", "answers": ["tightness of tape was loose before and secured afterwards", "location of coin was out of hinge before and in hinge afterwards", "state of coin was vulnerable before and secured afterwards", "state of door was loose before and tight afterwards", "location of coin was outside hinge before and inside hinge afterwards", "location of tape was on roll before and on coin afterwards."]}
{"id": "Place a Coin in the Door Hinge|5", "answers": ["hardness of lincoln tramp was loose before and tightened afterwards."]}
{"id": "Frame a Puzzle|1", "answers": ["state of frame was considered before and chosen afterwards", "state of the frame was unmeasured before and measured afterwards", "knowledge of frame was unmeasured before and measured afterwards."]}
{"id": "Frame a Puzzle|2", "answers": ["state of material was whole before and cut afterwards", "shape of material was whole before and cut afterwards", "step of backing material was uncut before and cut afterwards", "size of frame was whole before and cut in half afterwards", "composition of frame was uncut before and cut afterwards", "weight of frame was light before and heavier afterwards."]}
{"id": "Frame a Puzzle|3", "answers": ["location of wax paper was in package before and in work area afterwards", "location of wax paper was separate before and attached to frame afterwards", "state of the paper was flat before and sliding afterwards", "state of backing material was unattached before and attached afterwards", "weight of the frame was lighter before and heavier afterwards", "location of wax paper was on table before and in your hands afterwards", "weight of frame was light before and heavier afterwards", "orientation of wax paper was flat before and folded afterwards", "state of backing material was unslated before and slid under puzzle afterwards."]}
{"id": "Frame a Puzzle|4", "answers": ["texture of board was flat before and flattened afterwards", "shape of rolling pin was flat before and flattened afterwards", "state of pin was unused before and used afterwards", "location of wax paper was in package before and on board afterwards", "texture of puzzle was smooth before and sticky afterwards", "location of rolling pin was in box before and in your hand afterwards", "shape of wax paper was flat before and flattened afterwards", "pressure of rolling pin was still before and pressed afterwards."]}
{"id": "Frame a Puzzle|5", "answers": ["stickiness of paintbrush was dry before and sticky afterwards", "texture of table was smooth before and sticky afterwards", "texture of board was smooth before and tacky afterwards", "density of glue was wet before and dry afterwards", "location of glue was in bottle before and on board afterwards", "state of surface was bare before and glued afterwards", "state of the hoopla was unpainted before and painted afterwards", "texture of board was smooth before and sticky afterwards."]}
{"id": "Frame a Puzzle|6", "answers": ["composition of glue was wet before and dry afterwards", "moisture of board was wet before and dry afterwards", "state of glue was liquid before and solid afterwards", "moisture of graphite was wet before and dry afterwards", "state of gameboard was vulnerable before and protected afterwards."]}
{"id": "Frame a Puzzle|7", "answers": ["stickiness of backing material was stickier before and smoother afterwards", "state of the back end of the rope was unattached before and glued afterwards", "location of glue was on the roll before and on the board afterwards", "state of wood was whole before and glued afterwards", "color of surface was unpainted before and painted afterwards", "state of the back end of the rope was unattached before and glued afterwards."]}
{"id": "Frame a Puzzle|8", "answers": ["wetness of board was wet before and dry afterwards", "temperature of board was cool before and warm afterwards", "location of glue was in bottle before and on board afterwards", "state of the puzzle was wet before and now dry afterwards", "wetness of bonding material was wet before and dry afterwards", "texture of board was sticky before and smooth afterwards."]}
{"id": "Frame a Puzzle|9", "answers": ["composition of the puzzle was whole before and partially afterwards", "container of frame was empty before and full afterwards", "size of the puzzle was bigger before and smaller afterwards."]}
{"id": "Set up a tent|1", "answers": ["tarp placement of tarp was away from tent before and placed on tent afterwards", "location of tarp was in storage before and on work area afterwards", "state of tent was bare before and secured afterwards", "state of tent was falling apart before and repaired afterwards", "temperature of tarp was cold before and warming up afterwards", "orientation of tent was folded before and upright afterwards", "state of tent was unattached before and attached afterwards", "temperature of tarp was room temperature before and warm afterwards", "placement of tarp was away from tent before and placed on tent afterwards", "temperature of tarp was cool before and warm afterwards", "orientation of tent was open before and closed with tent afterwards", "location of tarp was on the table before and on the ground afterwards", "temperature of tarp was room temperature before and warm afterwards."]}
{"id": "Set up a tent|2", "answers": ["state of tent was unarranged before and arranged afterwards", "support structure of tent was folded before and flat afterwards", "state of tent was unattached before and attached afterwards", "location of tape was on roll before and on wood afterwards", "position of tent was folded before and upright afterwards"]}
{"id": "Set up a tent|3", "answers": ["orientation of tent was lying horizontally before and on tarp afterwards", "support of tent was unsupported before and supported afterwards", "location of tarp was on the ground before and on the tent afterwards", "shape of tent was flat before and rounded afterwards", "state of tarp was unattached before and attached afterwards", "orientation of tent was horizontal before and upright afterwards", "location of tarp was in the hand before and on the ground afterwards", "area of tarp was spread out before and laid out afterwards", "state of tent was unattached before and attached afterwards."]}
{"id": "Set up a tent|4", "answers": ["There will be no change."]}
{"id": "Set up a tent|5", "answers": ["There will be no change."]}
{"id": "Set up a tent|6", "answers": ["density of floor was flat before and raised afterwards", "weight of tent was lighter before and heavier afterwards"]}
{"id": "Set up a tent|7", "answers": ["location of tent was in middle before and lowered afterwards", "form of ground was dirt before and a tent afterwards", "strength of strength of tent was low before and higher afterwards", "state of ground was even before and holding gaps in it afterwards"]}
{"id": "Set up a tent|8", "answers": ["moisture of ground was dry before and damp afterwards", "location of rain fly was in bag before and on tent afterwards", "form of umbrella was folded before and extended afterwards", "location of umbrella was outside of tent before and on tent afterwards", "state of tent was bare before and covered afterwards", "weight of tent was lighter before and heavier afterwards", "wetness of tent was dry before and wet afterwards", "state of fly was in bag before and on ground afterwards."]}
{"id": "Make a pie crust|1", "answers": ["location of salt was in package before and in bowl afterwards", "cleanness of bowl was clean before and dirty afterwards", "location of flour was in bag before and in bowl afterwards", "location of sugar was in package before and in bowl afterwards", "location of flour was in bag before and in bowl afterwards", "location of salt was in shaker before and in bowl afterwards"]}
{"id": "Make a pie crust|2", "answers": ["weight of bowl was lighter before and heavier afterwards", "shape of butter was uncut before and cut into pieces afterwards", "state of butter was whole before and cut afterwards", "cleanness of cutting board was clean before and dirty afterwards", "moisture of butter was dry before and wet afterwards", "cleanness of cutting board was clean before and dirty afterwards", "size of butter was whole before and cut into pieces afterwards", "composition of butter was whole before and cut up afterwards", "texture of butter was dry before and moist afterwards", "location of butter was in the fridge before and in the bowl afterwards."]}
{"id": "Make a pie crust|3", "answers": ["composition of eggshell was whole before and cracked afterwards", "location of egg was in shell before and in bowl afterwards", "state of mixing bowl was empty before and full afterwards", "composition of egg yolk was whole before and broken afterwards", "state of egg was separate from the yolk before and mixed with the yolk afterwards", "location of egg was in the shell before and in the bowl afterwards", "moisture of bowl was dry before and wet afterwards", "state of butter was unseasoned before and seasoned afterwards", "moisture of salt was dry before and wet afterwards", "location of egg was outside of bowl before and inside bowl afterwards."]}
{"id": "Make a pie crust|4", "answers": ["weight of bowl was lighter before and heavier afterwards", "state of flour was dry before and wet afterwards", "location of dough was in the bowl before and on the floured surface afterwards", "location of egg was in the shell before and on the pan afterwards", "location of egg was in bowl before and on floured surface afterwards", "cleanness of bowl was clean before and dirty afterwards", "wetness of dough was dry before and wet afterwards", "location of bowl was on table before and in work area afterwards", "location of egg was in the shell before and on a floured surface afterwards."]}
{"id": "Make a pie crust|5", "answers": ["shape of dough was round before and flat afterwards", "location of disc was in the bowl before and on the table afterwards", "location of dough was in a bowl before and on a sheet pan afterwards", "fullness of sheet pan was empty before and full afterwards", "texture of dough was soft before and firmer afterwards", "power of hand was relaxed before and being used afterwards", "shape of dough was round before and flat afterwards."]}
{"id": "Make a pie crust|6", "answers": ["location of dough was on table before and in fridge afterwards", "state of fridge was open before and closed afterwards", "texture of mixture was soft before and firmer afterwards", "location of timer was absent before and present afterwards", "temperature of bowl was cool before and warm afterwards", "temperature of oven was cool before and hot afterwards", "temperature of scooper was room temperature before and hot afterwards", "state of timer was off before and on afterwards", "location of dough was in bowl before and on table afterwards", "state of mixture was frozen before and solid afterwards."]}
{"id": "Make a pie crust|7", "answers": ["volume of tray was empty before and full afterwards", "location of dough was on table before and on baking sheet afterwards", "temperature of crust was cool before and hot afterwards", "location of tray was on counter before and on baking sheet afterwards", "state of crust was unattached before and attached afterwards", "state of crust was on table before and on sheet afterwards", "volume of table was empty before and covered afterwards", "temperature of sheet pan was cold before and hot afterwards", "electric conductivity of oven was turned off before and turned on afterwards", "shape of dough was flat before and rolled out afterwards", "location of dough was on the counter before and on the table afterwards", "texture of crust was soft before and more firm afterwards."]}
{"id": "Make a pie crust|8", "answers": ["location of parchment was on roll before and on tray afterwards", "location of parchment was in drawer before and on tray afterwards", "location of crust was in the fridge before and on the counter afterwards", "temperature of crust was warm before and cold afterwards", "texture of crust was soft before and crispy afterwards", "texture of bowl was firmer before and soft afterwards", "location of parchment was in the drawer before and on the table afterwards", "texture of crust was firm before and slightly soft afterwards."]}
{"id": "Make a pie crust|9", "answers": ["temperature of oven was room temperature before and 350 degrees afterwards", "temperature of parchment was room temperature before and 350 degrees afterwards", "state of crust was unbaked before and baked afterwards", "temperature of oven was cool before and hot afterwards", "state of crust was raw before and cooked afterwards", "temperature of oven was cool before and hot afterwards", "location of the pan was in the oven before and out of the oven afterwards", "power of oven was off before and on afterwards", "temperature of oven was cold before and hot afterwards", "state of crust was unripe before and ripe afterwards", "temperature of pan was room temperature before and 350 degrees afterwards", "fullness of oven was empty before and preheated afterwards", "texture of crust was soft before and crispy afterwards."]}
{"id": "Make a pie crust|10", "answers": ["temperature of crust was cool before and hot afterwards", "temperature of crust was room temperature before and baked in 350 degrees afterwards", "texture of crust was soft before and crispy afterwards", "state of crust was raw before and cooked afterwards", "placement of baking sheet was absent before and on table afterwards", "state of oven was off before and on afterwards", "state of crust was raw before and cooked afterwards", "availability of oven was absent before and present afterwards", "temperature of oven was cold before and hot afterwards", "hardness of crust was soft before and hard afterwards", "temperature of oven was cold before and hot afterwards", "power of oven was off before and on afterwards."]}
{"id": "Go to see a musical|1", "answers": ["knowledge of price was unknown before and known afterwards", "location of web site was at the store before and at the home afterwards", "location of computer was in the bedroom before and on the table afterwards", "knowledge of price was unknown before and known afterwards", "location of laptop was on the table before and in the bag afterwards."]}
{"id": "Go to see a musical|2", "answers": ["location of ticket was at store before and at home afterwards", "ownership of ticket was at store before and bought online afterwards", "step of cheapest ticket was unchosen before and chosen afterwards", "location of computer was on the table before and in the glove box afterwards."]}
{"id": "Go to see a musical|3", "answers": ["location of location was at the store before and at the house afterwards", "state of house was uncovered before and covered afterwards", "location of person was at home before and at the concert afterwards."]}
{"id": "Go to see a musical|4", "answers": ["location of person was at start point before and in seat afterwards", "orientation of seat was vacant before and occupied afterwards"]}
{"id": "Go to see a musical|5", "answers": ["state of monitor was off before and on afterwards", "location of person was inside before and outside afterwards", "power of music was on before and off afterwards"]}
{"id": "Go to see a musical|6", "answers": ["movement of person was pressing a button before and jumping afterwards", "location of person was outside of the theater before and inside the theater afterwards", "sound of room was quiet before and noisy afterwards."]}
{"id": "Draw an music animation|1", "answers": ["decoration of background music was undecorated before and decorated afterwards", "knowledge of music background was unselected before and selected afterwards", "composition of background music was unselected before and selected afterwards", "cost of music was on sale in store before and purchased from store afterwards."]}
{"id": "Draw an music animation|2", "answers": ["step of outline was unmade before and made afterwards", "location of pen was on the table before and in the hand afterwards", "state of paper was empty before and written on afterwards", "location of ink was in pen before and on paper afterwards", "location of graphite was in pencil before and on paper afterwards", "step of outline was incomplete before and complete afterwards", "state of paper was blank before and written on afterwards."]}
{"id": "Draw an music animation|3", "answers": ["step of scene was unidentified before and drawn afterwards", "moisture of ink was wet before and dry afterwards", "state of paper was blank before and written on afterwards", "moisture of ink was wet before and dry afterwards", "location of ink was in pen before and on paper afterwards", "state of paper was blank before and written on afterwards", "location of pencil was on the table before and in the hand afterwards", "moisture of ink was wet before and dry afterwards."]}
{"id": "Draw an music animation|4", "answers": ["organization of material was seperate before and combined afterwards", "state of paper was blank before and written on afterwards", "color of paper was blank before and colored afterwards", "state of paper was blank before and written on afterwards", "complexity of scene was undreamed of before and created afterwards."]}
{"id": "Draw an music animation|5", "answers": ["state of video was closed before and open afterwards", "state of video was closed before and opened afterwards", "step of video editor was closed before and open afterwards", "state of video was closed before and open afterwards."]}
{"id": "Draw an music animation|6", "answers": ["volume of drawer was closed before and open afterwards", "state of video was closed before and open afterwards", "step of importing of music and drawings was unmade before and made afterwards", "state of video was unloaded before and loaded afterwards."]}
{"id": "Draw an music animation|7", "answers": ["step of music was unrecorded before and recorded afterwards", "electric conductivity of screen was turned off before and turned on afterwards", "location of music was on shelf before and on timeline afterwards", "location of the music was somewhere else before and on the timeline afterwards", "electric conductivity of timeline was turned off before and turned on afterwards", "state of video was unrecorded before and recorded afterwards."]}
{"id": "Draw an music animation|8", "answers": ["state of timeline was incomplete before and complete afterwards", "state of woohoo video game was absent before and purchased afterwards."]}
{"id": "Draw an music animation|9", "answers": ["location of music was on the table before and in the drawings afterwards", "location of music was off screen before and on screen afterwards."]}
{"id": "Draw an music animation|10", "answers": ["state of software program was closed before and running afterwards", "step of importing of video was unassembled before and assembled afterwards", "state of software program was closed before and open afterwards."]}
{"id": "Apply a screen protector on a phone|1", "answers": ["purchase of protector was at store before and obtained afterwards", "location of protector was at the store before and in your house afterwards", "location of protector was at the store before and at home afterwards."]}
{"id": "Apply a screen protector on a phone|2", "answers": ["location of low-dust workspace was on floor before and in workspace afterwards", "ownership of workspace was owned by store before and bought by you afterwards", "state of workspace was empty before and occupied afterwards", "location of low-dust workspace was somewhere else before and in your workspace afterwards."]}
{"id": "Apply a screen protector on a phone|3", "answers": ["location of soap was in bottle before and in sink afterwards", "location of dirt was on desk before and in sink afterwards", "cleanness of sink was dirty before and clean afterwards", "state of soap was in bottle before and in sink afterwards", "state of water was off before and on afterwards", "volume of sink was empty before and full afterwards", "composition of sink was empty before and full of water afterwards", "moisture of sink was dry before and wet afterwards", "location of soap was in container before and in drain afterwards."]}
{"id": "Apply a screen protector on a phone|4", "answers": ["brightness of screen was dirty before and clean afterwards", "cleanness of screen was dirty before and clean afterwards", "brightness of screen was dirty before and bright afterwards", "location of dirt was on screen before and in drain afterwards."]}
{"id": "Apply a screen protector on a phone|5", "answers": ["state of the screen protector was uninstalled before and installed afterwards", "location of protector was in package before and in hand afterwards", "location of protector was at shop before and at home afterwards."]}
{"id": "Apply a screen protector on a phone|6", "answers": ["state of protector was whole before and peeled afterwards", "state of protector was connected before and disconnected afterwards", "location of protector was on before and off afterwards", "composition of screen protector was connected before and separated afterwards", "location of plastic was on the box before and off the box afterwards", "composition of protector was full of holes before and peeled off afterwards"]}
{"id": "Apply a screen protector on a phone|7", "answers": ["state of protector was unattached before and attached afterwards", "state of protector was whole before and pierced afterwards", "location of protector was in hand before and on screen afterwards", "shape of protector was whole before and peeled afterwards", "organization of screen protector was connected before and disconnected afterwards."]}
{"id": "Apply a screen protector on a phone|8", "answers": ["pressure of grip was loose before and tight afterwards", "orientation of face was facing down before and facing forward afterwards", "state of device was vibrating before and still afterwards", "location of air was on protector before and on person afterwards", "stability of device was connected before and disconnected afterwards", "location of protector was on before and off afterwards."]}
{"id": "Jump a car battery|1", "answers": ["location of hood was closed before and open afterwards", "location of hood was closed before and open afterwards", "state of car was closed before and open afterwards", "power of car was off before and on afterwards", "location of battery was missing from car before and located in car afterwards", "orientation of hood was closed before and open afterwards", "location of hood was in cupboard before and open afterwards."]}
{"id": "Jump a car battery|2", "answers": ["location of disabled car was at home before and outside afterwards", "state of hood was closed before and open afterwards", "brightness of hood light was off before and on afterwards", "electric conductivity of car was turned off before and turned on afterwards", "location of working car was stationary before and moved to car afterwards", "electric conductivity of engine was off before and engaged afterwards", "location of hood was off the car before and on the car afterwards", "orientation of hood was closed before and open afterwards", "location of hood was next to car before and next to disabled car afterwards"]}
{"id": "Jump a car battery|3", "answers": ["location of safety gear was off before and on afterwards", "safety of car was unsafe before and safe afterwards", "safety of vehicle was unsafe before and safe afterwards", "knowledge of gps location of safety gear was unknown before and known afterwards."]}
{"id": "Jump a car battery|4", "answers": ["state of hood was closed before and open afterwards", "state of hood was closed before and open afterwards", "wire of wire was hanging from the hood before and hanging from the hood afterwards."]}
{"id": "Jump a car battery|5", "answers": ["There will be no change."]}
{"id": "Jump a car battery|6", "answers": ["power of engine was powered off before and powered on afterwards", "state of car was off before and on afterwards", "movement of car was stopped before and moving afterwards", "position of hood was down before and up afterwards", "position of hood was down before and up afterwards", "electric conductivity of car was turned off before and turned on afterwards", "speed of car was slow before and fast afterwards", "position of hood was down before and up afterwards", "location of car was outside the car before and inside the car afterwards."]}
{"id": "Jump a car battery|7", "answers": ["state of vehicle was idling before and starting the disabled vehicle afterwards", "location of disabled vehicle was away from work before and near work afterwards", "electric conductivity of plug was disconnected before and plugged in afterwards", "state of disabled vehicle was idling before and starting the disabled vehicle afterwards"]}
{"id": "Jump a car battery|8", "answers": ["state of car was connected before and unconnected afterwards", "state of the cable was connected before and removed afterwards", "location of disabled car was connected before and removed afterwards."]}
{"id": "Jump a car battery|9", "answers": ["state of engine was running before and running afterwards", "running of the car was going strong before and going lighter afterwards", "power of engine was running before and shut down afterwards", "location of the engine was moving forward before and moving backwards afterwards", "location of throttle was held before and unturned afterwards."]}
{"id": "Make Colored Light Bulbs|1", "answers": ["state of bulb was considered before and selected afterwards", "power of faucet was off before and on afterwards", "state of bulb was turned off before and turned on afterwards", "location of switch was loose before and attached to switch afterwards", "brightness of bulb was dark before and bright afterwards", "brightness of bulb was dull before and brighter afterwards", "brightness of bulb was dark before and bright afterwards."]}
{"id": "Make Colored Light Bulbs|2", "answers": ["purchase of special heat-resistant glass paint was at store before and purchased afterwards", "ownership of glass paint was at paintstore before and purchased by you afterwards", "location of glass paint was at store before and at home afterwards."]}
{"id": "Make Colored Light Bulbs|3", "answers": ["location of alcohol was in container before and on bulbs afterwards", "fullness of bottle was more full before and less full afterwards", "cleanness of bulb was dirty before and clean afterwards", "moisture of bulb was dry before and wet afterwards", "alcohol of rubbing alcohol was in bottle before and on bulb afterwards", "location of alcohol was in a bottle before and on a bulb afterwards", "state of bulb was dirty before and clean afterwards", "location of rubbing alcohol was in bottle before and on bulb afterwards", "moisture of bulb was dry before and wet afterwards", "location of alcohol was in bottle before and on bulb afterwards", "moisture of bulb was dry before and wet afterwards."]}
{"id": "Make Colored Light Bulbs|4", "answers": ["location of bulb was on counter before and in basket afterwards", "orientation of light bulb was static before and mounted on table afterwards", "location of plastic was on roll before and on bulb afterwards", "orientation of bulb was horizontally held before and vertically held afterwards", "moisture of bulb was dry before and wet afterwards", "state of light bulb was unlit before and lit afterwards", "location of alcohol was in bottle before and on bulb afterwards", "state of bulb was on table before and lit afterwards", "brightness of light bulb was dark before and bright afterwards."]}
{"id": "Make Colored Light Bulbs|5", "answers": ["color of light bulb was unpainted before and painted afterwards", "location of paint was in can before and on bulb afterwards", "moisture of bulb was dry before and wet afterwards", "state of bulb was bare before and loaded afterwards", "weight of bulb was light before and lighter afterwards", "cleanness of brush was clean before and dirty afterwards", "texture of bulb was smooth before and tacky afterwards", "composition of paint was liquid before and solid afterwards", "state of bulb was unattached before and attached afterwards", "location of paintbrush was in storage before and on light bulb afterwards", "wetness of brush was dry before and wet afterwards", "openness of paint bucket was closed before and open afterwards", "texture of bulb was smooth before and tacky afterwards."]}
{"id": "Make Colored Light Bulbs|6", "answers": ["wetness of sponge was dry before and wet afterwards", "wetness of bulb was wet before and dry afterwards", "moisture of bulb was wet before and dry afterwards", "location of paint was in container before and on bulb afterwards", "wetness of bulb was wet before and dry afterwards", "wetness of bulb was wet before and dry afterwards", "state of paint was wet before and dry afterwards", "wetness of bulb was dry before and wet afterwards", "temperature of bulb was cool before and warm afterwards."]}
{"id": "Make packaged ramen in microwave|1", "answers": ["state of package was full before and empty afterwards", "cleanness of pan was clean before and sticky with noodles afterwards", "state of pan was empty before and full afterwards"]}
{"id": "Make packaged ramen in microwave|2", "answers": ["cleanness of bowl was clean before and dirty afterwards", "location of bowl was on the counter before and in the microwave afterwards", "temperature of bowl was room temperature before and cold afterwards", "temperature of bowl was room temperature before and cold afterwards", "volume of bowl was empty before and full afterwards", "location of water was in faucet before and in bowl afterwards", "volume of bowl was empty before and full afterwards", "temperature of water was hot before and cold afterwards."]}
{"id": "Make packaged ramen in microwave|3", "answers": ["weight of bowl was lighter before and heavier afterwards", "volume of bowl was empty before and full afterwards", "temperature of water was hot before and cooling afterwards", "state of water faucet was off before and on afterwards", "location of water was in the bowl before and in the bowl afterwards", "state of water faucet was off before and on afterwards", "location of water was in the bowl before and in the bowl afterwards", "cleanness of bowl was clean before and dirty afterwards", "volume of microwave was empty before and full afterwards", "location of water was in bowl before and in sink afterwards."]}
{"id": "Make packaged ramen in microwave|4", "answers": ["temperature of water was cold before and hot afterwards", "state of water was boiling before and still afterwards", "temperature of water was cool before and warm afterwards", "volume of microwave was empty before and full afterwards", "state of water was cold before and warm afterwards", "temperature of water was cold before and hot afterwards", "state of water was still before and boiling afterwards"]}
{"id": "Make packaged ramen in microwave|5", "answers": ["volume of microwave was empty before and full afterwards", "temperature of microwave was cold before and hot afterwards", "state of microwave was cold before and hot afterwards", "power of microwave was off before and on afterwards"]}
{"id": "Make packaged ramen in microwave|6", "answers": ["volume of bowl was full before and empty afterwards", "location of bowl was inside the microwave before and outside the microwave afterwards", "volume of microwave was full before and empty afterwards", "temperature of bowl was room temperature before and cold afterwards", "temperature of bowl was room temperature before and cold afterwards"]}
{"id": "Make packaged ramen in microwave|7", "answers": ["location of flavor packet was in package before and in bowl afterwards", "location of the flavor packet was outside of the microwave before and inside the microwave afterwards", "weight of package was heavier before and lighter afterwards", "location of packet was in bowl before and in microwave afterwards", "volume of bowl was empty before and full afterwards", "fullness of microwave was empty before and full afterwards", "volume of bowl was empty before and full afterwards", "location of the flavor packet was in the microwave before and outside the microwave afterwards", "location of mixture was in bowl before and in microwave afterwards."]}
{"id": "Throw a Football|1", "answers": ["placement of football was in hands before and picked up by your throwing hand afterwards", "state of football was unselected before and picked up afterwards", "speed of football was still before and in motion afterwards", "location of football was picked up before and thrown afterwards", "state of hand was empty before and holding football afterwards", "location of football was on ground before and picked up afterwards", "state of your throwing hand was empty before and now holding football afterwards", "availability of football was absent before and present afterwards."]}
{"id": "Throw a Football|2", "answers": ["location of body was in usual stance before and in throwing stance afterwards."]}
{"id": "Throw a Football|3", "answers": ["position of head was facing forward before and facing sideways afterwards", "location of football was held by your hand before and now held by your ear afterwards", "location of football was held by hand before and thrown by ear afterwards", "orientation of ear was uncovered before and covered afterwards", "location of football was held by your hand before and now held by ear afterwards"]}
{"id": "Throw a Football|4", "answers": ["state of ball was unstable before and stabilized afterwards", "state of ball was throwing shoulder before and non-throwing shoulder afterwards", "location of ball was in hands before and on ground afterwards", "stability of ball was loose before and stabilized afterwards", "volume of hand was empty before and holding ball afterwards."]}
{"id": "Throw a Football|5", "answers": ["location of hand was in air before and on ground afterwards", "state of non-throwing hand was releasing the ball before and releasing the ball afterwards", "location of throwing hand was in air before and on ground afterwards", "state of ball was free before and held afterwards", "state of hand was closed before and open afterwards."]}
{"id": "Throw a Football|6", "answers": ["distance of arm was back before and forward afterwards", "state of arm was back before and now released afterwards", "state of arm was down before and up afterwards", "location of throwing hand was on the ground before and in the air afterwards", "state of hand was closed before and open afterwards."]}
{"id": "Throw a Football|7", "answers": ["location of ball was in hand before and out of hand afterwards", "location of ball was in hand before and out of hand afterwards", "movement of arm was still before and in motion afterwards", "location of throwing arm was on ground before and in motion afterwards", "location of football was in hand before and outside of hand afterwards", "speed of arm was still before and in motion afterwards."]}
{"id": "Play the clarinet|1", "answers": ["There will be no change."]}
{"id": "Play the clarinet|2", "answers": ["arrangement of reed was disassembled before and reassembled afterwards", "cleanness of reed was dirty before and clean afterwards", "composition of the mouthpiece was separate before and now together afterwards", "location of reed was in box before and on board afterwards", "cleanness of the reed was dirty before and clean afterwards", "ownership of reed was the property of the store before and owned by the person afterwards."]}
{"id": "Play the clarinet|3", "answers": ["location of hand was down before and up afterwards", "state of the net was loose before and now tight afterwards", "position of the net was down before and up afterwards", "stability of the net was loose before and now tight afterwards", "state of reed was unused before and used afterwards."]}
{"id": "Play the clarinet|4", "answers": ["cleanness of the board was dirty before and clean afterwards", "cleanness of board was dirty before and clean afterwards", "cleanness of the cloth was clean before and dirty afterwards", "state of the board was intact before and disassembled afterwards."]}
{"id": "Wear contact lenses|1", "answers": ["location of soap was in bottle before and in sink afterwards", "state of soap and water were touching before and washed off afterwards", "state of soap was touching before and unwashed afterwards", "location of soap was in container before and in water afterwards", "location of water was in faucet before and in sink afterwards", "volume of soap dispenser was full before and empty afterwards", "state of soap and water were touching before and unwashed afterwards."]}
{"id": "Wear contact lenses|2", "answers": ["location of lid was on the case before and off the case afterwards", "state of lens was covered before and uncovered afterwards", "location of lid was on the case before and off the case afterwards", "orientation of lens was open before and closed afterwards", "location of case was on the table before and on the table afterwards", "state of lens was covered before and uncovered afterwards."]}
{"id": "Wear contact lenses|3", "answers": ["location of finger was in front of lens before and behind lens afterwards", "cleanness of finger was clean before and covered in soap afterwards", "composition of lens was in one piece before and split afterwards", "location of lens was on the case before and in the hand afterwards", "state of lens was attached before and free sliding afterwards."]}
{"id": "Wear contact lenses|4", "answers": ["odor of lens was soapy smelling before and fresh afterwards", "location of clean soap was in bottle before and on lens afterwards", "cleanness of lens was dirty before and clean afterwards", "state of lens was dry before and wet afterwards", "cleanness of the finger was clean before and dirty afterwards", "state of lens was rinsed before and clean afterwards", "state of lens was covered before and uncovered afterwards", "cleanness of contact lens was soapy before and rinsed afterwards."]}
{"id": "Wear contact lenses|5", "answers": ["position of finger was straight before and curled afterwards", "orientation of contact lens was on the table before and in the air afterwards", "orientation of middle finger was straight before and curved afterwards", "state of finger was empty before and holding the lens afterwards", "location of the middle finger was off the lens before and on the lens afterwards."]}
{"id": "Wear contact lenses|6", "answers": ["position of middle finger was straight before and curved afterwards", "location of hand was by side of face before and in between contacts afterwards", "openness of contact lens was closed before and open afterwards."]}
{"id": "Wear contact lenses|7", "answers": ["location of contact lens was close to the eyes before and far from the eyes afterwards"]}
{"id": "Wear contact lenses|8", "answers": ["movement of contact lens was stationary before and moving afterwards", "state of eye was unfocused before and focused afterwards"]}
{"id": "Apply for a UK visa|1", "answers": ["state of webpage was closed before and open afterwards", "location of  center was at http://www before and at  nearby afterwards", "state of application was considered before and made afterwards", "location of address book was at http://www before and at  nearby afterwards", "knowledge of person was ignorant of viaduct center before and knowledgeable of viaduct center afterwards."]}
{"id": "Apply for a UK visa|2", "answers": ["location of your appointment was in person before and now made available afterwards", "cost of appointment was unpurchased before and purchased afterwards", "location of cupboard was in the living room before and outside the living room afterwards", "step of appointment was incomplete before and complete afterwards."]}
{"id": "Apply for a UK visa|3", "answers": ["material of material was unprepared before and prepared afterwards", "location of shovel was in the garage before and in the workshop afterwards", "readiness of workshop was unprepared for material before and prepared for material afterwards", "readiness of material was unprepared before and prepared afterwards."]}
{"id": "Apply for a UK visa|4", "answers": ["location of person was at home before and at your place afterwards", "state of appointment was unmade before and made afterwards", "location of application was at the office before and in the hall afterwards."]}
{"id": "Apply for a UK visa|5", "answers": ["location of person was at home before and in the country afterwards", "location of envelope was in a package before and on the bed afterwards", "state of letter \"o\" was missing before and appearing afterwards", "step of home and receive your visa by mail was unclicked before and clicked afterwards", "status of person was at home before and in the country afterwards", "volume of mailbox was empty before and full afterwards", "state of attachment was missing before and uploaded afterwards", "state of envelope was missing before and attached to letter afterwards."]}
{"id": "Clean baked on grease off glass dishes|1", "answers": ["wetness of spoon was dry before and wet afterwards", "wetness of spoon was dry before and wet afterwards", "weight of the dish was lighter before and heavier afterwards", "location of warm water was outside of bowl before and in bowl afterwards", "volume of the dish was emptier before and fuller afterwards", "weight of bowl was lighter before and heavier afterwards", "state of water faucet was off before and on afterwards", "state of water was pure before and mixed afterwards", "wetness of the dish was dryer before and wetter afterwards", "location of spoon was outside of bowl before and inside bowl afterwards."]}
{"id": "Clean baked on grease off glass dishes|2", "answers": ["volume of the bowl was less full before and fuller afterwards", "location of dish soap was in a container before and in the bowl afterwards", "location of soap mixture was in a spoon before and in the bowl afterwards", "weight of bowl was lighter before and heavier afterwards", "location of soap was outside of bowl before and inside bowl afterwards", "fullness of bowl was emptier before and fuller afterwards", "cleanness of spoon was clean before and dirty afterwards", "cleanness of bowl was clean before and dirty afterwards", "wetness of the bowl was drier before and wetter afterwards", "weight of bowl was lighter before and heavier afterwards", "volume of bowl was empty before and fuller afterwards", "weight of bowl was light before and heavy afterwards", "location of dish soap was outside of bowl before and inside bowl afterwards."]}
{"id": "Clean baked on grease off glass dishes|3", "answers": ["location of dryer sheet was on the counter before and in the glass dish afterwards", "covering of glass dish was bare before and covered afterwards", "location of dryer sheet was in drawer before and in dishwasher afterwards", "location of dryer was in cabinet before and in dishwasher afterwards", "temperature of dish soap was warm before and cold afterwards", "location of tray was in the cupboard before and on the counter afterwards", "volume of dish soap volume was fuller before and emptier afterwards", "state of dryer was dry before and wet afterwards", "weight of dish soap container was heavier before and lighter afterwards", "temperature of dish soap was warm before and cold afterwards", "moisture of dryer was dry before and wet afterwards", "volume of water volume was fuller before and emptier afterwards", "weight of dish was lighter before and heavier afterwards."]}
{"id": "Clean baked on grease off glass dishes|4", "answers": ["movement of water was moving across sponge before and still afterwards", "cleanness of glassware was clean before and dirty afterwards", "temperature of water was cool before and hot afterwards", "movement of sheet was sitting before and moving afterwards", "state of glassware was covered before and bare afterwards", "temperature of bowl was room temperature before and hot afterwards", "temperature of mixture was cooler before and warmer afterwards", "location of person was inside before and outside afterwards", "temperature of glassware was warm before and hot afterwards", "location of towel was in drawer before and in hand afterwards."]}
{"id": "Clean baked on grease off glass dishes|5", "answers": ["cleanness of sponge was clean before and dirty afterwards", "location of grease was on bread before and on towel afterwards", "texture of mixture was sticky before and smooth afterwards", "wetness of baking sheet was wet before and dry afterwards", "location of bread was in the oven before and on the baking sheet afterwards", "cleanness of sponge was clean before and dirty afterwards", "cleanness of baking sheet was dirty before and clean afterwards", "location of grease was on bread before and on towel afterwards", "wetness of baking sheet was wet before and dry afterwards", "texture of baking sheet was sticky before and dry afterwards."]}
{"id": "Prepare a custartd ice cream base|1", "answers": ["state of milk was liquid before and solid afterwards", "volume of the glass was empty before and full afterwards", "temperature of the milk was cold before and warming up afterwards", "location of milk was on shelf before and in glass afterwards", "location of milk was outside of sims before and inside sims afterwards", "hardness of the milk was harder before and softer afterwards", "container of glass was empty before and full afterwards"]}
{"id": "Prepare a custartd ice cream base|2", "answers": ["wetness of salt was dry before and wet afterwards", "wetness of spoon was dry before and wet afterwards", "moisture of salt was dry before and wet afterwards", "location of sugar was outside of bowl before and inside bowl afterwards", "moisture of salt was dry before and wet afterwards"]}
{"id": "Prepare a custartd ice cream base|3", "answers": ["wetness of spoon was dry before and wet afterwards", "location of milk mixture was in the fridge before and in the bowl afterwards", "wetness of bowl was dry before and wet afterwards", "moisture of salt was dry before and wet afterwards", "location of milk was outside of bowl before and inside of bowl afterwards", "temperature of milk mixture was hot before and cooler afterwards", "location of milk was outside of the bowl before and inside the bowl afterwards", "temperature of egg mixture was warm before and cooler afterwards", "state of egg was solid before and liquid afterwards", "location of egg mixture was in the fridge before and in the bowl afterwards."]}
{"id": "Prepare a custartd ice cream base|4", "answers": ["temperature of mixture was cooler before and hotter afterwards", "temperature of mixture was cool before and hot afterwards", "temperature of mixture was room temperature before and hotter afterwards", "power of stove was off before and on afterwards", "temperature of mixture was cool before and hot afterwards", "location of mixture was in the pot before and in the oven afterwards", "temperature of mixture was cold before and hotter afterwards", "temperature of mixture was cooler before and warmer afterwards", "temperature of mixture was cool before and hot afterwards", "wetness of pot was dry before and wet afterwards", "location of mixture was in the pot before and in the oven afterwards."]}
{"id": "Prepare a custartd ice cream base|5", "answers": ["temperature of mix was colder before and warmer afterwards", "taste of mixture was bland before and vanilla infused afterwards", "location of vanilla ice bath was absent before and present afterwards", "state of mixture was cool before and hot afterwards", "location of vanilla ice bath was absent before and present afterwards", "temperature of mixture was warm before and cool afterwards", "texture of mixture was liquidy before and firmer afterwards", "volume of bath was empty before and full afterwards", "moisture of ice bath was dry before and wet afterwards", "location of vanilla ice bath was in the freezer before and in the pot afterwards."]}
{"id": "Prepare a custartd ice cream base|6", "answers": ["hardness of mixture was loose before and firmer afterwards", "texture of mixture was loose before and smoother afterwards", "temperature of mixture was room temperature before and cold afterwards", "moisture of mixture was dry before and wet afterwards", "temperature of mixture was room temperature before and cold afterwards", "temperature of mixture was room temperature before and cold afterwards", "temperature of mixutre was warm before and cold afterwards."]}
{"id": "Fold a shirt|1", "answers": ["location of shirt was in hands before and on flat surface afterwards", "layering of shirt was  flat before and lying flat afterwards", "location of shirt was in arms before and on tray afterwards", "location of shirt was on chair before and on tray afterwards", "coverage of face was uncovered before and covered afterwards", "location of shirt was on the chair before and lying on the flat surface afterwards", "position of shirt was flat before and upright afterwards", "layering of shirt was an exercise before and a family shirt afterwards", "location of shirt was in hand before and on tray afterwards", "covering of face was uncovered before and covered afterwards."]}
{"id": "Fold a shirt|2", "answers": ["shape of fabric was crumpled before and flat afterwards", "thickness of fabric was stretched before and flattened afterwards", "texture of shirt was wrinkled before and smooth afterwards", "shape of fabric was wrinkled before and flat afterwards."]}
{"id": "Fold a shirt|3", "answers": ["shape of shirt was flat before and folded afterwards", "width of the shirt was wider before and narrower afterwards", "shape of the shirt was flat before and folded afterwards", "shape of shirt was flat before and folded afterwards."]}
{"id": "Fold a shirt|4", "answers": ["shape of the fabric was flat before and folded afterwards", "shape of sleeve was straight before and folded afterwards", "width of the fabric was a certain shape before and folded in a different shape afterwards"]}
{"id": "Fold a shirt|5", "answers": ["location of shirt was on counter before and in hand afterwards", "state of shirt was flat before and folded afterwards", "shape of sweater was flat before and folded afterwards", "composition of fabric was straight before and turned afterwards", "length of fabric was longer before and shorter afterwards", "location of shirt was on the table before and in the hands afterwards"]}
{"id": "Fold a shirt|6", "answers": ["shape of fabric was twice as big as it appears on paper before and is smaller as it goes up in the paper afterwards."]}
