# Supplementary material
Source: ML conference proceedings conference paper supplement (https://aclanthology.org/2023.findings-eacl.31)
Supplement: dataset [file 2023.findings-eacl.31.dataset.zip › causal_reasoning_of_entities_and_events/openpi/weiqiu1.0/0hop-predictions-test-formatted.jsonl]

{"id": "Clean up kitchen counter|1", "answers": ["There will be no change."]}
{"id": "Clean up kitchen counter|2", "answers": ["location of items were on table before and in washing machine afterwards", "state of laundry was dirty before and cleaned afterwards", "state of water was off before and on afterwards", "location of wipes were in pantry before and in washing machine afterwards", "weight of washing machine was light before and heavier afterwards", "volume of washing machine was empty before and full afterwards", "location of water was in pipes before and in sink afterwards", "location of water was in pipes before and in sink afterwards", "location of laundry detergent was in jug before and in water afterwards", "location of soap was in bottle before and in water afterwards", "location of hands were at the sides of the washing machine before and in the washing machine afterwards", "location of water was in pipes before and in sink afterwards."]}
{"id": "Clean up kitchen counter|3", "answers": ["cleanness of kitchen counter was dirty before and clean afterwards", "state of kitchen was likely to have smelly residue before and less likely to have smelly residue afterwards", "cleanness of sink was dirty before and clean afterwards", "wetness of dish soap dispenser was dry before and wet afterwards", "state of counter was cluttered before and clear afterwards", "wetness of counter was dry before and wet afterwards."]}
{"id": "Clean up kitchen counter|4", "answers": ["cleanness of kitchen counter was dirty before and clean afterwards", "location of soap was in a container before and in water afterwards", "state of wall was bare before and covered afterwards", "wetness of kitchen counter was dry before and wet afterwards", "state of counter was smelly before and clean afterwards", "state of sink was partially full of water before and full of water afterwards", "moisture of counter was dry before and wet afterwards."]}
{"id": "Clean up kitchen counter|5", "answers": ["wetness of kitchen counter was wet before and dry afterwards", "wetness of counter was wet before and dry afterwards", "fullness of bucket was full before and empty afterwards", "location of water was in a faucet before and in the sink afterwards", "wetness of kitchen counter was wet before and dry afterwards", "state of kitchen was soapy before and damp afterwards."]}
{"id": "Write an essay|1", "answers": ["organization of topic was undefined before and defined afterwards", "topic of idea was unstarted before and in progress afterwards", "focus of reader was on the topic before and finished with the topic afterwards."]}
{"id": "Write an essay|2", "answers": ["location of pencil was on the table before and in hand afterwards", "state of paper was blank before and written on afterwards", "state of paper was blank before and written on afterwards", "state of pen was empty before and occupied afterwards", "color of paper was blank before and colored afterwards."]}
{"id": "Write an essay|3", "answers": ["organization of material was disorganized before andorganized afterwards", "state of outline was just found out before and followed afterwards", "shape of outline was static before and extended afterwards", "state of section was unread before and followed afterwards."]}
{"id": "Write an essay|4", "answers": ["analyse of essay was without a section before and read afterwards", "state of section was missing before and found afterwards", "state of passage was untransferred before and read afterwards", "state of hypothesis was being created before and tested afterwards."]}
{"id": "Write an essay|5", "answers": ["There will be no change."]}
{"id": "Apply for a chess tournament|1", "answers": ["availability of online database of tennis events was absent before and present afterwards", "state of online searching was unfound before and found afterwards", "state of search box was closed before and open afterwards", "availability of online database of tennis was missing before and available afterwards."]}
{"id": "Apply for a chess tournament|2", "answers": ["There will be no change."]}
{"id": "Apply for a chess tournament|3", "answers": ["knowledge of date was indeterminate before and specified afterwards", "state of calendar was absent before and present afterwards", "action of date was unmade before and made afterwards."]}
{"id": "Apply for a chess tournament|4", "answers": ["step of confirm email was unopened before and opened afterwards", "state of email was unopened before and opened afterwards", "state of email was considered before and accepted afterwards", "state of email was unopened before and opened afterwards", "state of confirm email was clicked before and unclicked afterwards", "state of event registration was unopened before and opened afterwards."]}
{"id": "Mow the lawn|1", "answers": ["state of motor was unplugged before and plugged in afterwards", "electric conductivity of lawn mower was turned off before and turned on afterwards", "location of lawn mower was unset before and set up afterwards", "knowledge of setting up lawn mower was unknown before and known afterwards", "electric conductivity of tractor was turned off before and turned on afterwards", "state of lawn mower was unset before and set up afterwards."]}
{"id": "Mow the lawn|2", "answers": ["state of mower was unset before and set afterwards", "orientation of mower was horizontal before and vertical afterwards", "power of mower was off before and on afterwards", "location of mower was in garage before and in work area afterwards", "usage of mower was unused before and used afterwards", "location of mower was inside the garage before and outside the garage afterwards."]}
{"id": "Mow the lawn|3", "answers": ["state of mower was unready before and ready afterwards", "power of mower was off before and on afterwards", "state of mower was idle before and running afterwards", "state of wood was whole before and chopped afterwards", "condition of mower was powered down before and powered on afterwards", "wetness of mower was dry before and wet afterwards", "cleanness of mower was dirty before and clean afterwards."]}
{"id": "Heat pancake|1", "answers": ["cleanness of pan was clean before and dirty afterwards", "location of the plate was off the counter before and on the counter afterwards", "fullness of refrigerator was more full before and less full afterwards", "weight of the plate was lighter before and heavier afterwards", "location of the pancake was outside the refrigerator before and inside the refrigerator afterwards", "location of the pancake was on the counter before and in the trash afterwards", "location of plate was in fridge before and in your hand afterwards", "location of the plate was in the fridge before and on the counter afterwards", "location of the pancake was out of the refrigerator before and in the fridge afterwards", "location of plate was in box before and in trash afterwards."]}
{"id": "Heat pancake|2", "answers": ["location of spoon was in drawer before and in microwave afterwards", "volume of the microwave was empty before and containing the popsicle afterwards", "temperature of the microwave was cold before and warm afterwards", "location of pancake was outside of microwave before and inside microwave afterwards", "weight of the microwave was lighter before and heavier afterwards", "location of the popsicle was outside of the microwave before and inside the microwave afterwards", "location of microwave door was closed before and open afterwards", "temperature of microwave was cold before and warm afterwards", "power of microwave was off before and on afterwards", "composition of the pancake was harder before and softer afterwards", "temperature of the pancake was warmer before and cooler afterwards", "volume of microwave was empty before and full afterwards", "temperature of microwave was cold before and hot afterwards", "temperature of person was hungry before and satisfied afterwards", "location of the popsicle was outside of the microwave before and inside the microwave afterwards."]}
{"id": "Heat pancake|3", "answers": ["temperature of mixture was cooler before and hotter afterwards", "state of button was bare before and pressed afterwards", "location of microwave was off before and on afterwards", "state of option was empty before and full afterwards", "temperature of microwave was cold before and warm afterwards", "power of microwave was off before and on afterwards", "electric conductivity of microwave was turned off before and turned on afterwards", "temperature of liquid was warmer before and cooler afterwards", "temperature of frying pan was cold before and hot afterwards", "power of microwave was off before and on afterwards", "volume of pan was empty before and full afterwards", "electric conductivity of stove burner was off before and on afterwards"]}
{"id": "Heat pancake|4", "answers": ["temperature of mixture was cooler before and warmer afterwards", "location of the pancake was inside the microwave before and outside the microwave afterwards", "volume of microwave was empty before and full afterwards", "location of pancake was inside fridge before and outside fridge afterwards", "location of the pancake was inside the microwave before and out of the microwave afterwards", "temperature of food was warmer before and cooler afterwards", "temperature of meal was warm before and cooling afterwards", "weight of microwave was light before and heavier afterwards", "temperature of the pancake was warmer before and cooler afterwards."]}
{"id": "Wash your hands|1", "answers": ["moisture of running water was dry before and wet afterwards", "wetness of hand was dry before and wet afterwards", "location of water was in faucet before and in container afterwards."]}
{"id": "Wash your hands|2", "answers": ["location of soap was in the bottle before and on the hands afterwards", "soap state of soap was mixed before and separated afterwards", "location of soap was in bottle before and on hands afterwards", "soap container of soap container was full before and less full afterwards", "location of water was in faucet before and in drain afterwards", "location of soap was in bottle before and on hands afterwards", "location of soap was in bottle before and on sink afterwards", "state of soap was mixed before and separated afterwards"]}
{"id": "Wash your hands|3", "answers": ["location of soap was in bottle before and on hands afterwards", "dryness of soap was wet before and dry afterwards", "location of water was in faucet before and in drain afterwards", "cleanness of face was soapy before and rinsed afterwards", "location of soap was in bottle before and on hands afterwards", "location of soap was in bathroom before and in drain afterwards"]}
{"id": "Buy a ticket from SF to Hawaii|1", "answers": ["state of search for \"buses\" was unopened before and opened afterwards", "availability of airport was absent before and present afterwards", "state of google page for buses was loading before and loading afterwards", "state of airline schedule was unread before and read afterwards", "location of airport information was unavailable before and available afterwards", "location of airport was unchosen before and chosen afterwards", "location of airport was unchosen before and chosen afterwards", "step of airport availability was unknown before and known afterwards."]}
{"id": "Buy a ticket from SF to Hawaii|2", "answers": ["knowledge of knowledge of airline time zone differential was absent before and present afterwards", "location of airline was offline before and online afterwards", "state of airline schedule was unfound before and found afterwards"]}
{"id": "Buy a ticket from SF to Hawaii|3", "answers": ["knowledge of price was unselected before and selected afterwards", "ownership of ticket was occupied before and absent afterwards", "cost of ticket was unpurchased before and purchased afterwards", "step of buy/sell button was unclicked before and clicked afterwards", "state of airline ticket price was unselected before and selected afterwards", "state of ticket price was unselected before and selected afterwards", "step of buy/sell button was unclicked before and clicked afterwards."]}
{"id": "Buy a ticket from SF to Hawaii|4", "answers": ["state of email was unread before and read afterwards", "state of ticket was clicked before and unclicked afterwards", "step of email notification was unclicked before and clicked afterwards", "state of airline ticket was on sale before and purchased afterwards."]}
{"id": "Drive to Los Angelas|1", "answers": ["visibility of gasoline was visible before and invisible afterwards", "state of gas tank was full of gas before and empty afterwards", "weight of the tank was heavier before and lighter afterwards", "state of gasoline was solid before and melted afterwards", "temperature of engine was hot before and cool afterwards", "state of fuel was in bottle before and burned afterwards", "state of car was off before and on afterwards", "temperature of engine was hot before and cool afterwards", "location of the gasoline was in the bottle before and in the car afterwards", "weight of the car was lighter before and heavier afterwards", "state of fuel was separate before and combined afterwards", "electric conductivity of car was turned off before and turned on afterwards", "electric conductivity of stove was turned off before and turned on afterwards", "location of gasoline was in bottle before and in car afterwards."]}
{"id": "Drive to Los Angelas|2", "answers": ["power of car was off before and on afterwards", "distance of i5 from LA was parked at speed before and moving at low speed afterwards", "state of hood was down before and up afterwards", "stability of road was punctured before and repaired afterwards", "location of car was at rest before and in drive afterwards", "location of i5 was traveling east on road before and traveling west on road afterwards", "position of hood was down before and up afterwards", "electric conductivity of engine was off before and running afterwards", "temperature of car was cool before and warm afterwards", "weight of car was lighter before and heavier afterwards", "state of road was unoccupied before and occupied afterwards", "speed of i5 was traveling slowly before and approaching LA afterwards."]}
{"id": "Drive to Los Angelas|3", "answers": ["There will be no change."]}
{"id": "Boating in lake|1", "answers": ["location of boat was absent before and present afterwards", "ownership of boat was bought before and is now bought afterwards", "location of boat was at store before and at home afterwards", "cost of boat was on sale in store before and purchased from store afterwards", "location of person was in need of boat before and now in possession of boat afterwards."]}
{"id": "Boating in lake|2", "answers": ["location of boat was away from boat before and near boat afterwards", "state of lake was undiscovered before and discovered afterwards", "location of boating was missing before and found afterwards", "albedo of boat was dull before and shiny afterwards", "ownership of lake was owned by the store before and owned by the shopper afterwards", "location of boating was at store before and in lake afterwards."]}
{"id": "Boating in lake|3", "answers": ["temperature of engine was hot before and warm afterwards", "motion of boat was stationary before and turning afterwards", "location of boat was at home before and at lake afterwards", "power of engine was off before and on afterwards", "state of air in lake was empty before and full of holes afterwards", "location of boat was at home before and set in lake afterwards", "location of boat was at home before and at lake afterwards", "location of person was out of the water before and in the water afterwards", "temperature of boat was warm before and cold afterwards."]}
{"id": "Boating in lake|4", "answers": ["state of enjoyment was absent before and present afterwards", "location of boating was absent before and present afterwards", "mood of boating was unbalanced before and balanced afterwards", "knowledge of person was ignorant of everything before and knowledgeable afterwards", "state of enjoyment was absent before and present afterwards", "location of boat was in the morning before and in the evening afterwards."]}
{"id": "Implement a code function|1", "answers": ["state of documentation was absent before and present afterwards", "state of hypothesis was created before and tested afterwards", "knowledge of functionality was undefined before and defined afterwards", "state of documentation was absent before and found afterwards", "knowledge of scope of functionality was undefined before and defined afterwards."]}
{"id": "Implement a code function|2", "answers": ["organization of step was unknown before and known afterwards", "state of function was considered before and implemented afterwards."]}
{"id": "Implement a code function|3", "answers": ["state of function was unmade before and made afterwards", "state of functionality was considered before and implemented afterwards."]}
{"id": "Implement a code function|4", "answers": ["state of unit test was incomplete before and completed afterwards", "state of test was incomplete before and completed afterwards", "knowledge of you were unaware of what unit test was absent before and is present afterwards", "state of system test was incomplete before and complete afterwards."]}
{"id": "\u00ef\u00bb\u00bfMaking a Virgin Strawberry Daiquiri|1", "answers": ["fullness of blender was empty before and filled with ice afterwards", "container of blender was empty before and full afterwards", "state of ice was whole before and cracked afterwards", "location of ice was outside of blender before and inside blender afterwards", "size of ice was smaller before and larger afterwards", "moisture of blender was dry before and wet afterwards", "temperature of blender was cold before and warming afterwards", "location of cracker was in the box before and in the blender afterwards", "location of ice was outside of blender before and inside blender afterwards."]}
{"id": "\u00ef\u00bb\u00bfMaking a Virgin Strawberry Daiquiri|2", "answers": ["thickness of fruit was thicker before and thinner afterwards", "cleanness of cutting board was clean before and dirty afterwards", "wetness of blender was dry before and wet afterwards", "cleanness of knife was clean before and dirty afterwards", "moisture of knife was dry before and wet afterwards."]}
{"id": "\u00ef\u00bb\u00bfMaking a Virgin Strawberry Daiquiri|3", "answers": ["location of sugar was outside of blender before and inside of blender afterwards", "moisture of sugar was dry before and wet afterwards", "moisture of lime was dry before and wet afterwards", "fullness of blender was emptier before and fuller afterwards", "location of lime juice was outside of blender before and inside blender afterwards", "temperature of water was cold before and hot afterwards", "location of juice was outside of blender before and inside blender afterwards", "state of sugar was solid before and liquid afterwards", "location of lime juice was in container before and in blender afterwards", "location of lime juice was in jar before and in blender afterwards."]}
{"id": "\u00ef\u00bb\u00bfMaking a Virgin Strawberry Daiquiri|4", "answers": ["color of mixture was colorless before and silvery gray afterwards", "power of blender was off before and on afterwards", "texture of mixture was bumpy before and smooth afterwards", "state of mix was still before and blended afterwards", "cleanness of blender was clean before and dirty afterwards", "size of mixture was large before and small afterwards."]}
{"id": "\u00ef\u00bb\u00bfMaking a Virgin Strawberry Daiquiri|5", "answers": ["size of glass was empty before and full afterwards", "location of mixture was in blender before and in glass afterwards", "wetness of glass was dry before and wet afterwards", "location of mixture was in blender before and in glass afterwards", "temperature of glass was room temperature before and cold afterwards", "location of mixture was in blender before and in glass afterwards", "location of mixture was in blender before and in glass afterwards", "moisture of glass was dry before and wet afterwards", "weight of blender was heavier before and lighter afterwards", "fullness of glass was empty before and full afterwards", "location of mixture was in blender before and in glass afterwards", "cleanness of glass was clean before and dirty afterwards", "cleanness of glass was clean before and dirty afterwards"]}
{"id": "\u00ef\u00bb\u00bfMaking a Virgin Strawberry Daiquiri|6", "answers": ["container of blender was full before and empty afterwards", "location of glass was in cabinet before and on table afterwards", "state of glass was empty before and full afterwards", "location of mixture was in blender before and in glass afterwards", "location of glass was in the cupboard before and on the table afterwards", "decoration of glass was undecorated before and decorated afterwards."]}
{"id": "Making Matcha Green Tea the Traditional Way|1", "answers": ["wetness of spoon was dry before and wet afterwards", "wetness of spoon was dry before and wet afterwards", "location of water was in the bucket before and in the bowl afterwards", "state of the bowl was dry before and wet afterwards", "state of water faucet was off before and on afterwards", "moisture of bowl was dry before and wet afterwards", "temperature of water was cold before and hot afterwards", "location of mixture was in the pot before and in the bowl afterwards", "temperature of matcha was room temperature before and hot afterwards", "state of water faucet was off before and on afterwards", "wetness of matcha was dry before and wet afterwards", "state of matcha was raw before and cooked afterwards", "state of the bowl was empty before and now containing the mixture afterwards", "temperature of water was room temperature before and hot afterwards", "weight of the bowl was lighter before and heavier afterwards", "temperature of matcha was cold before and hot afterwards."]}
{"id": "Making Matcha Green Tea the Traditional Way|2", "answers": ["wetness of the bowl was drier before and wetter afterwards", "location of water was in pot before and in bowl afterwards", "temperature of water was room temperature before and hot afterwards", "state of bowl was clean before and containing  hot water afterwards", "temperature of water was cold before and hot afterwards", "state of chasen was dry before and wet afterwards", "wetness of the bowl was dryer before and wetter afterwards", "temperature of water was room temperature before and hot afterwards", "wetness of the bowl was drier before and wetter afterwards", "location of water was in jug before and in bowl afterwards", "location of water was in jug before and in bowl afterwards."]}
{"id": "Making Matcha Green Tea the Traditional Way|3", "answers": ["cleanness of the bowl was drier before and wetter afterwards", "weight of the bowl was heavier before and lighter afterwards", "fullness of bowl was more full before and less full afterwards", "location of water was in the bowl before and in the bowl afterwards", "temperature of the bowl was warmer before and cooler afterwards", "weight of the bowl was lighter before and heavier afterwards", "location of water was in bowl before and in drain afterwards", "location of hot water was in the bowl before and in the bowl afterwards", "temperature of water was hot before and cooling afterwards", "temperature of water was boiling before and cooling afterwards", "location of water was in bowl before and in drain afterwards", "fullness of bucket was more full before and less full afterwards."]}
{"id": "Making Matcha Green Tea the Traditional Way|4", "answers": ["weight of bowl was heavier before and lighter afterwards", "cleanness of strainer was clean before and dirty afterwards", "weight of bowl was heavy before and light afterwards", "location of matcha was in bowl before and in saucet afterwards", "location of matcha was in the bowl before and in the sink afterwards", "wetness of cleaning mixture was dry before and wet afterwards", "state of matcha was wet before and dry afterwards", "cleanness of strainer was clean before and dirty afterwards", "location of matcha was in the bowl before and in the strainer afterwards", "fullness of bowl was more full before and less full afterwards", "fullness of bowl was full before and empty afterwards."]}
{"id": "Making Matcha Green Tea the Traditional Way|5", "answers": ["cleanness of the bowl was clean before and dirtier afterwards", "moisture of strainer was dry before and wet afterwards", "temperature of the matcha was warm before and colder afterwards", "cleanness of bowl was clean before and dirty afterwards", "location of matcha was in the bowl before and in the bowl afterwards", "cleanness of the bowl was clean before and dirty afterwards", "texture of strainer was dry before and wet afterwards", "cleanness of bowl was clean before and dirty afterwards", "fullness of bowl was empty before and full afterwards", "weight of the bowl was lighter before and heavier afterwards", "location of matcha was in bowl before and in strainer afterwards", "cleanness of matcha was dirty before and clean afterwards."]}
{"id": "Making Matcha Green Tea the Traditional Way|6", "answers": ["moisture of matcha was wet before and dry afterwards", "temperature of tea was hot before and cool afterwards", "fullness of teacup was emptier before and fuller afterwards", "location of water was in a bowl before and in a cup afterwards", "wetness of mixture was wet before and dry afterwards", "volume of teacup was empty before and full afterwards", "cleanness of teaspoon was clean before and dirty afterwards", "weight of teacup was lighter before and heavier afterwards", "location of boiling water was in the bowl before and in the water afterwards", "wetness of matcha was wet before and dry afterwards", "location of water was in the bowl before and in a cup afterwards", "temperature of matcha was hot before and cool afterwards", "wetness of matcha was wet before and dry afterwards", "location of water was in a bowl before and in a cup afterwards", "volume of teacup was empty before and full afterwards", "location of water was in bucket before and in bowl afterwards."]}
{"id": "Making Matcha Green Tea the Traditional Way|7", "answers": ["temperature of matcha was hot before and cooler afterwards", "temperature of mixture was hotter before and cooler afterwards", "location of hot water was in a pot before and in a bowl afterwards", "temperature of water was boiling before and colder afterwards", "weight of bowl was lighter before and heavier afterwards", "volume of pot was fuller before and emptier afterwards", "location of water was in a measuring cup before and in the bowl afterwards", "wetness of matcha was dry before and wet afterwards", "temperature of water was boiling before and cooling afterwards", "temperature of water was boiling before and cooler afterwards", "wetness of matcha was dry before and wet afterwards", "location of water was in the bowl before and in the bowl afterwards."]}
{"id": "Making Matcha Green Tea the Traditional Way|8", "answers": ["fullness of teacup was less full before and more full afterwards", "temperature of hot water was cooler before and hotter afterwards", "location of teacup was away from bowl before and in bowl afterwards", "fullness of bowl was somewhat full before and more full afterwards", "distance of water was away from bowl before and in bowl afterwards", "location of water was in the tap before and in the bowl afterwards", "fullness of bowl was somewhat full before and more full afterwards", "temperature of water was warm before and colder afterwards", "temperature of matcha was hot before and cool afterwards", "weight of teacup was lighter before and heavier afterwards."]}
{"id": "Making Matcha Green Tea the Traditional Way|9", "answers": ["cleanness of the utensil was dirty before and clean afterwards", "weight of the bowl was lighter before and heavier afterwards", "temperature of the bowl was warmer before and cooler afterwards", "cleanness of utensil was dirty before and clean afterwards", "state of the matcha was containing some water before and now free of water afterwards", "state of air was clear before and filled with matcha afterwards."]}
{"id": "How to Make a Watermelon Keg|1", "answers": ["wetness of watermelon was dry before and wet afterwards", "hydration of watermelon was dehydrated before and hydrated afterwards", "state of watermelon was dry before and wet afterwards", "state of the pot was empty before and full afterwards", "location of watermelon was in kitchen before and in watermelon afterwards", "composition of watermelon was whole before and soaked afterwards", "wetness of watermelon was dry before and wet afterwards", "cleanness of pot was clean before and dirty afterwards", "weight of the pot was lighter before and heavier afterwards", "location of watermelon was on counter before and in pot afterwards."]}
{"id": "How to Make a Watermelon Keg|2", "answers": ["color of watermelon was clear before and marked afterwards", "moisture of cutting board was dry before and wet afterwards", "cleanness of saw blade was clean before and dirty afterwards", "state of watermelon was whole before and cut afterwards", "cleanness of knife was clean before and dirty afterwards", "composition of watermelon was whole before and cut afterwards", "moisture of knife was dry before and wet afterwards", "marking of watermelon was whole before and marked afterwards", "state of watermelon was whole before and cut afterwards", "state of knife was unmarked before and sawed afterwards", "cleanness of cutting board was clean before and dirty afterwards."]}
{"id": "How to Make a Watermelon Keg|3", "answers": ["shape of watermelon was intact before and cut afterwards", "moisture of ink was wet before and dry afterwards", "state of watermelon was plain before and drawn on afterwards", "moisture of paper was dry before and wet afterwards", "moisture of knife was dry before and wet afterwards", "organization of watermelon was plain before and drawn on afterwards", "moisture of chalk was dry before and wet afterwards", "cleanness of paper was clean before and dirty afterwards", "location of ink was in pen before and on watermelon afterwards", "state of design was nonexistant before and repeated afterwards."]}
{"id": "How to Make a Watermelon Keg|4", "answers": ["state of watermelon was bare before and covered afterwards", "state of watermelon was covered in paint before and drawn with a line afterwards", "location of paint was in container before and on watermelon afterwards", "moisture of paintbrush was dry before and wet afterwards", "location of watermelon was on counter before and in wall afterwards", "moisture of knife was dry before and wet afterwards", "color of watermelon was beige before and silver afterwards", "shape of watermelon was intact before and cut afterwards", "moisture of paintbrush was dry before and wet afterwards", "state of watermelon was whole before and cut afterwards", "color of watermelon was one color before and multiple colors afterwards", "state of watermelon was whole before and cut afterwards", "location of pencil was in drawer before and on table afterwards."]}
{"id": "How to Make a Watermelon Keg|5", "answers": ["shape of watermelon was intact before and cut afterwards", "size of watermelon was whole before and below afterwards", "state of watermelon was whole before and cut afterwards", "weight of watermelon was heavier before and lighter afterwards", "moisture of knife was dry before and wet afterwards", "composition of watermelon was intact before and cut afterwards", "composition of knife was smooth before and covered in glue afterwards", "shape of watermelon was whole before and without decoration afterwards."]}
{"id": "How to Make a Watermelon Keg|6", "answers": ["filled of spoon was full before and empty afterwards", "moisture of knife was dry before and wet afterwards", "state of watermelon was whole before and in pieces afterwards", "moisture of cutting board was dry before and wet afterwards", "size of watermelon was whole before and cut into pieces afterwards", "location of knife was on counter before and in hand afterwards", "location of watermelon was on plant before and off plant afterwards", "composition of watermelon was whole before and cut up afterwards."]}
{"id": "How to Make a Watermelon Keg|7", "answers": ["weight of bowl was heavier before and lighter afterwards", "state of watermelon was whole before and sliced afterwards."]}
{"id": "How to Make a Watermelon Keg|8", "answers": ["state of paper towel was dry before and wet afterwards", "cleanness of paper towel was clean before and dirty afterwards", "moisture of paper towel was dry before and wet afterwards", "texture of watermelon was wet before and dry afterwards", "location of paper towel was on roll before and in watermelon afterwards", "cleanness of towel was clean before and covered in juice afterwards", "state of watermelon was covered in flesh before and clean afterwards."]}
{"id": "How to Make a Watermelon Keg|9", "answers": ["state of watermelon was messy before and neat afterwards", "organization of watermelon was piled before and divided afterwards", "location of paper towel was absent before and present afterwards", "decoration of watermelon was ungarnished before and decorated afterwards", "state of watermelon was bare before and adorned afterwards."]}
{"id": "How to Make a Watermelon Keg|10", "answers": ["location of batter was in container before and in bowl afterwards", "temperature of watermelon was hot before and cool afterwards", "location of food was in bowl before and in cup afterwards", "temperature of bowl was room temperature before and cool afterwards", "ownership of drink was owned by the store before and owned by the shopper afterwards", "location of food was outside of bowl before and inside bowl afterwards", "state of watermelon was raw before and cooked afterwards", "temperature of watermelon was hot before and cooler afterwards", "fullness of container was full before and empty afterwards"]}
{"id": "How to Make a Watermelon Keg|11", "answers": ["power of phone was off before and on afterwards", "speed of fish was still before and swimming afterwards", "location of measuring cup was in the drawer before and on the table afterwards", "knowledge of food recipe was unknown before and learned afterwards", "state of watermelon was whole before and filleted afterwards", "state of measuring cup was closed before and open afterwards."]}
{"id": "How to Make a Watermelon Keg|12", "answers": ["gravitational motion of watermelon was still before and wobbling afterwards", "location of watermelon was in bowl before and in glass afterwards", "moisture of punch was dry before and wet afterwards", "location of watermelon was in plastic before and in glass afterwards", "state of drink was unready before and ready to drink afterwards", "texture of mixture was bumpy before and smooth afterwards", "wetness of glass was dry before and wet afterwards", "volume of bucket was full before and empty afterwards", "location of watermelon was in bowl before and in glass afterwards."]}
{"id": "How to Make a Watermelon Keg|13", "answers": ["state of watermelon was unplanted before and plated afterwards", "weight of display was lighter before and heavier afterwards", "location of watermelon was in bowl before and in display case afterwards", "texture of watermelon was plated before and tested afterwards", "location of watermelon was in bowl before and on display afterwards", "consumption of watermelon was unsaved before and saved afterwards."]}
{"id": "Making Simple Eggnog|1", "answers": ["location of milk was in a container before and in the bowl afterwards", "composition of milk mixture was by itself before and mixed with other ingredients afterwards", "location of milk was in carton before and in bowl afterwards", "volume of container was full before and empty afterwards", "weight of container was heavier before and lighter afterwards", "location of milk mixture was in refrigerator before and in bowl afterwards"]}
{"id": "Making Simple Eggnog|2", "answers": ["moisture of bowl was dry before and wet afterwards", "location of egg was in the fridge before and in the bowl afterwards", "moisture of bowl was dry before and wet afterwards", "temperature of egg mixture was cool before and warm afterwards", "temperature of milk mixture was cooler before and warmer afterwards", "moisture of mixing spoon was dry before and wet afterwards", "location of egg mixture was outside of bowl before and inside of bowl afterwards", "volume of mixing bowl was empty before and fuller afterwards", "composition of egg yolk was whole before and broken afterwards", "state of egg mixture was uncooked before and cooked afterwards", "temperature of bowl was cool before and hot afterwards", "location of egg mixture was in kitchen before and in bowl afterwards", "composition of egg yolk was whole before and broken afterwards."]}
{"id": "Making Simple Eggnog|3", "answers": ["temperature of egg mixture was cooler before and warmer afterwards", "state of mixing bowl was empty before and containing milk afterwards", "texture of mixture was dry before and moist afterwards", "temperature of egg mixture was cool before and hot afterwards", "temperature of milk mixture was room temperature before and heated afterwards", "state of milk mixture was dry before and wet afterwards", "fullness of mixing bowl was empty before and full afterwards", "temperature of milk mixture was cold before and hot afterwards", "wetness of egg mixture was dry before and wet afterwards."]}
{"id": "Making Simple Eggnog|4", "answers": ["state of stove was on before and off afterwards", "location of eggnog was in the pan before and in the ash pile afterwards", "temperature of eggnog was hot before and warm afterwards", "cleanness of bowl was clean before and dirty afterwards", "location of eggnog was inside the shell before and out of the shell afterwards", "temperature of egg mixture was hot before and cooler afterwards", "state of egg mixture was in the mixture before and removed afterwards", "location of eggnog was in bowl before and in ash pile afterwards", "cleanness of spoon was clean before and dirty afterwards", "location of eggnog was in the bowl before and in the ash pile afterwards", "temperature of eggnog was cold before and warmer afterwards", "temperature of eggnog was hot before and warm afterwards."]}
{"id": "Making Simple Eggnog|5", "answers": ["weight of bowl was lighter before and heavier afterwards", "location of egg mixture was on counter before and in  bowl afterwards", "state of egg mixture was standing before and roiling afterwards"]}
{"id": "Making Simple Eggnog|6", "answers": ["form of eggnog was open before and covered afterwards", "state of plastic wrap was loose before and secured afterwards", "exposure of eggnog was exposed before and covered afterwards", "location of plastic wrap was on roll before and on eggnog afterwards", "state of eggnog was uncovered before and covered afterwards", "state of egg was free of pan before and covered with pan afterwards", "location of pan was in the cabinet before and on the table afterwards", "covering of eggnog was uncovered before and covered afterwards", "complexity of eggnog was open before and covered afterwards."]}
{"id": "How to Make Sbiten|1", "answers": ["form of mixture was stewed before and boiling afterwards", "state of water faucet was off before and turned on afterwards", "odor of water was bland smelling before and strong smelling afterwards", "power of stove was off before and on afterwards", "temperature of water was cold before and boiling afterwards", "temperature of water was room temp before and hotter afterwards", "texture of pot was mostly clean before and full of puddling afterwards", "temperature of water was cool before and hot afterwards", "state of water was still before and boiling afterwards", "state of stove was off before and on afterwards", "state of mixture was still before and boiling afterwards", "temperature of pan was cool before and hot afterwards", "temperature of water was cool before and hot afterwards."]}
{"id": "How to Make Sbiten|2", "answers": ["color of mixture was white before and colored afterwards", "location of ginger was in fridge before and in bowl afterwards", "location of cinnamon was outside of bowl before and inside bowl afterwards", "location of ginger was in bag before and in bowl afterwards", "weight of bowl was lighter before and heavier afterwards", "weight of counter was light before and heavier afterwards."]}
{"id": "How to Make Sbiten|3", "answers": ["state of stove was off before and on afterwards", "temperature of mixture was boiling before and simmering afterwards", "state of mixture was still before and simmering afterwards", "temperature of stove top was cold before and hot afterwards", "state of mixture was still before and simmering afterwards", "temperature of stove was cold before and hot afterwards", "power of heat was off before and on afterwards."]}
{"id": "How to Make Sbiten|4", "answers": ["composition of mixture was hot before and cool afterwards", "temperature of mixture was hot before and cooler afterwards", "state of mix was hot before and cooled afterwards", "temperature of ginger was hot before and cooler afterwards", "state of mixture was hot before and cooler afterwards", "texture of ginger was firm before and soft afterwards."]}
{"id": "How to Make Sbiten|5", "answers": ["location of candy was in pan before and on top of candy afterwards", "temperature of candy was hot before and cool afterwards", "temperature of mint leaf candy was cool before and warm afterwards", "location of candy was in container before and on cake afterwards", "temperature of candy was cold before and warmer afterwards", "weight of candy container was heavier before and lighter afterwards", "weight of cake was lighter before and heavier afterwards", "temperature of cake was cold before and hot afterwards", "location of mint leaf candy was on spoon before and on cake afterwards", "location of candy was in a container before and on a cake afterwards", "cleanness of garnish was clean before and dirty afterwards", "temperature of cake was cool before and hot afterwards."]}
{"id": "How to Cool a Hot Drink Quickly|1", "answers": ["location of drink was in cupboard before and in hand afterwards", "composition of drink was non-alcoholic before and alcoholic afterwards", "volume of cup was empty before and full afterwards", "weight of drink was light before and heavy afterwards", "location of drink was outside of cupboard before and in cup afterwards", "moisture of cup was dry before and wet afterwards", "wetness of cup was dry before and wet afterwards", "location of drink was outside of cupboard before and in cup afterwards", "composition of drink was non-alcoholic before and alcoholic afterwards", "fullness of cup was empty before and full afterwards", "volume of hand was empty before and holding cup afterwards."]}
{"id": "How to Cool a Hot Drink Quickly|2", "answers": ["temperature of drink was room temperature before and cool afterwards", "movement of drink was still before and agitated afterwards", "state of person was idle before and drinking the shot afterwards."]}
{"id": "How to Cool a Hot Drink Quickly|3", "answers": ["temperature of drink was warmer before and cooler afterwards", "state of drink was wet before and dry afterwards", "orientation of person was standing before and seated afterwards", "temperature of drink was hot before and cool afterwards", "location of drink was in cupboard before and in guest's hand afterwards", "volume of table was occupied before and empty afterwards", "state of drink was warm before and cooled afterwards."]}
{"id": "How to Make Hot Cocoa|1", "answers": ["fullness of saucepan was empty before and filled with ingredients afterwards", "cleanness of measuring cup was clean before and dirty afterwards", "temperature of saucepan was cool before and hot afterwards", "weight of saucepan was light before and heavy afterwards", "temperature of sugar was room temperature before and heated afterwards", "container of saucepan was empty before and full afterwards", "location of mixing bowl was in the cupboard before and on the counter afterwards", "fullness of mixing bowl was empty before and fuller afterwards", "location of sugar was in the container before and in the pan afterwards", "cleanness of measuring cup was clean before and dirty afterwards", "location of cocoa powder was in the wrapper before and in the pan afterwards"]}
{"id": "How to Make Hot Cocoa|2", "answers": ["state of hot cocoa was cold before and hot afterwards", "volume of the saucepan was empty before and fuller afterwards", "temperature of mixture was colder before and hotter afterwards", "state of the pan was empty before and filled with hot cocoa afterwards", "location of cocoa powder was in a package before and in the pan afterwards", "location of hot cocoa was missing from saucepan before and in saucepan afterwards", "temperature of cocoa powder was room temperature before and hot afterwards", "granularity of cocoa powder was hard before and melted afterwards", "temperature of cocoa was room temperature before and hot afterwards", "temperature of cocoa powder was cold before and warm afterwards", "location of mixture was in saucepan before and in pan afterwards."]}
{"id": "How to Make Hot Cocoa|3", "answers": ["location of vanilla was in a bottle before and in a mug afterwards", "state of mixture was unboiled before and boiled afterwards", "weight of mug was lighter before and heavier afterwards", "state of vanilla bean was whole before and in mug afterwards", "location of cocoa powder was in a container before and in a mugs afterwards", "location of vanilla bean was outside of mug before and inside mug afterwards", "state of vanilla bean was whole before and in mug afterwards"]}
{"id": "How to Make Hot Cocoa|4", "answers": ["flavor of mixture was plain before and topped off afterwards", "location of hot cocoa was in the saucepan before and on the counter top afterwards", "composition of hot cocoa was plain before and topped off afterwards", "location of whipped cream was in container before and on top of marshmallows afterwards", "temperature of mixture was room temperature before and hot afterwards", "location of chocolate was off of mug before and on mug afterwards"]}
{"id": "How to Make Hot Cocoa From Chocolate|1", "answers": ["composition of bittersweet was whole before and cut up afterwards", "location of bittersweet was in a package before and in a bowl afterwards", "fullness of cutting board was full before and partway empty afterwards", "location of chocolate was in a package before and in a bowl afterwards", "location of bittersweet was in the pantry before and on the counter top afterwards", "cleanness of spoon was clean before and dirty afterwards", "taste of chocolate was plain before and flavored afterwards", "location of chocolate was in a package before and in a bowl afterwards", "location of bittersweet was in a container before and in a bowl afterwards", "weight of bowl was lighter before and heavier afterwards", "location of chocolate was in a package before and in a bowl afterwards."]}
{"id": "How to Make Hot Cocoa From Chocolate|2", "answers": ["location of milk was in refrigerator before and in pan afterwards", "state of milk was solid before and liquid afterwards", "location of salt was in pantry before and in pan afterwards."]}
{"id": "How to Make Hot Cocoa From Chocolate|3", "answers": ["composition of chocolate was whole before and chopped afterwards", "shape of chocolate was intact before and whisked in afterwards", "location of chocolate was in package before and in blender afterwards", "location of chocolate was on counter before and in blender afterwards", "location of chocolate was in a package before and in the blender afterwards", "temperature of chocolate was cool before and warm afterwards", "texture of chocolate was solid before and melted afterwards."]}
{"id": "How to Make Hot Cocoa From Chocolate|4", "answers": ["wetness of spatula was dry before and wet afterwards", "state of chocolate was raw before and cooked afterwards", "location of spatula was in drawer before and in pot afterwards", "temperature of stove burner was cool before and hot afterwards", "fullness of pot was empty before and full afterwards", "wetness of spatula was dry before and wet afterwards", "location of vanilla was in the bottle before and in the pot afterwards", "state of mixture was separate before and stirred together afterwards", "location of spatula was in drawer before and in pot afterwards", "temperature of vanilla was cold before and warm afterwards", "location of spatula was on counter before and in pot afterwards."]}
{"id": "How to Make Hot Cocoa From Chocolate|5", "answers": ["location of chocolate was in a pot before and in a mugs afterwards", "temperature of chocolate was cold before and hot afterwards", "location of chocolate was in a pot before and in a mugs afterwards", "location of chocolate was in pan before and in mugs afterwards", "location of mixture was in pot before and in mugs afterwards", "temperature of chocolate was cool before and warm afterwards", "location of chocolate was in pot before and in mugs afterwards"]}
{"id": "Single-Serving Microwave Cocoa|1", "answers": ["moisture of mug was dry before and wet afterwards", "container of mug was empty before and full of ingredients afterwards", "location of cocoa powder was in a container before and in the mug afterwards", "location of sugar was in a package before and in the mug afterwards", "composition of salt was in granules before and dissolved afterwards", "cleanness of mug was clean before and dirty afterwards", "odor of mixture was odorless before and sweet smelling afterwards", "location of salt was in a container before and in the mug afterwards", "location of mixture was on counter before and in mug afterwards."]}
{"id": "Single-Serving Microwave Cocoa|2", "answers": ["volume of bowl was empty before and fuller afterwards", "location of milk was in the fridge before and in the mug afterwards", "location of milk was separate from cocoa powder before and mixed with cocoa powder afterwards", "wetness of mug was dry before and wet afterwards", "location of milk was in the carton before and in the bowl afterwards"]}
{"id": "Single-Serving Microwave Cocoa|3", "answers": ["electric conductivity of mixer was off before and on afterwards", "power of mixer was off before and on afterwards", "texture of mixture was lumpy before and smoother afterwards", "moisture of whisk was dry before and wet afterwards", "cleanness of whisk was clean before and dirty afterwards", "moisture of m mug was dry before and wet afterwards", "temperature of mixer was room temperature before and cold afterwards", "electric conductivity of mixer was turned off before and turned on afterwards", "movement of mixture was still before and moving afterwards", "state of mixture was unmixed before and mixed afterwards."]}
{"id": "Single-Serving Microwave Cocoa|4", "answers": ["mixture of mixture was less combined before and more combined afterwards", "location of vanilla was in the pantry before and in the mug afterwards", "location of vanilla was outside of mug before and inside mug afterwards", "location of cocoa was outside of mug before and inside mug afterwards", "composition of mixture was powdered before and drinkable afterwards", "moisture of mug was dry before and wet afterwards", "fullness of mixing cup was emptier before and fuller afterwards", "state of vanilla bean was separate from cocoa before and mixed with cocoa afterwards", "location of vanilla bean was outside of mug before and inside mug afterwards", "moisture of vanilla bean was dry before and wet afterwards."]}
{"id": "Make Cold Chocolate Drink|1", "answers": ["location of milk was in a container before and in the mug afterwards", "location of mug was in cupboard before and on counter afterwards", "state of mug was empty before and contains food afterwards", "volume of mug was empty before and full afterwards", "wetness of mug was dry before and wet afterwards", "location of milk was in carton before and in mug afterwards", "moisture of mug was dry before and wet afterwards", "moisture of mug was dry before and wet afterwards", "wetness of mug was empty before and covered in milk afterwards", "container of mug was empty before and full afterwards", "volume of mug was empty before and full afterwards", "location of milk was in the carton before and in the mug afterwards", "weight of mug was lighter before and heavier afterwards", "location of mug was in the cupboard before and on the counter afterwards."]}
{"id": "Make Cold Chocolate Drink|2", "answers": ["location of cocoa powder was in a package before and in a mug afterwards", "texture of mixture was smooth before and gritty afterwards", "location of sugar was in a container before and in a mug afterwards", "odor of mug was plain smelling before and sweet smelling afterwards", "location of sugar was in package before and in mug afterwards", "location of cocoa powder was in a package before and in a mug afterwards", "odor of mug was normal smelling before and sweet smelling afterwards", "texture of mixture was smooth before and sticky afterwards."]}
{"id": "Make Cold Chocolate Drink|3", "answers": ["electric conductivity of microwave was off before and on afterwards", "temperature of mug was room temperature before and cold afterwards", "state of mac was solid before and liquid afterwards", "texture of mixture was smoother before and foamy afterwards", "power of microwave was turned off before and turned on afterwards", "temperature of milk was cold before and hot afterwards", "texture of mixture was powdered before and dissolved afterwards", "sound of kitchen was quiet before and loud afterwards", "moisture of mug was dry before and wet afterwards."]}
{"id": "Make Cold Chocolate Drink|4", "answers": ["state of chocolate was solid before and melted afterwards", "temperature of mug was room temperature before and cold afterwards", "electric conductivity of microwave was turned off before and turned on afterwards", "temperature of mix was room temperature before and cold afterwards", "temperature of mug was room temperature before and cold afterwards", "temperature of ice was cold before and cool afterwards", "power of microwave was off before and on afterwards", "state of mix was liquid before and solid afterwards."]}
{"id": "Make Cold Chocolate Drink|5", "answers": ["temperature of mug was cool before and warm afterwards", "location of ice was in freezer before and in mixture afterwards", "temperature of mixture was cold before and warmer afterwards", "temperature of mixture was room temperature before and cold afterwards", "composition of cocoa powder and sugar was separate before and mixed afterwards", "temperature of mug was room temperature before and colder afterwards", "location of ice was in a container before and in the mug afterwards", "state of mixture was cool before and warmer afterwards", "temperature of mixture was room temperature before and cold afterwards."]}
{"id": "\ufeffHow to Make Pancakes|1", "answers": ["cleanness of bowl was clean before and dirty afterwards", "moisture of bowl was dry before and wet afterwards", "moisture of bowl was dry before and wet afterwards", "location of eggshell was on counter before and in bowl afterwards", "cleanness of bowl was clean before and dirty afterwards", "volume of bowl was empty before and full afterwards", "cleanness of spoon was clean before and dirty afterwards", "state of mixing bowl was clean before and full afterwards", "texture of mixture was lumpy before and smooth afterwards."]}
{"id": "\ufeffHow to Make Pancakes|2", "answers": ["state of bowl was empty before and filled with butter afterwards", "electric conductivity of microwave was off before and on afterwards", "cleanness of bowl was clean before and dirty afterwards", "state of butter was solid before and liquid afterwards", "temperature of butter was cold before and hot afterwards", "temperature of microwave was cold before and hot afterwards", "location of butter was in fridge before and in bowl afterwards", "location of butter was in fridge before and in bowl afterwards", "cleanness of microwave was clean before and dirty afterwards", "cleanness of bowl was clean before and dirty afterwards", "temperature of bowl was cool before and hot afterwards", "weight of microwave was lighter before and heavier afterwards", "volume of bowl was empty before and full afterwards", "location of butter was in fridge before and in bowl afterwards", "temperature of microwave was room temperature before and hot afterwards", "cleanness of bowl was clean before and dirty afterwards", "state of butter was solid before and liquid afterwards"]}
{"id": "\ufeffHow to Make Pancakes|3", "answers": ["volume of bowl was empty before and full afterwards", "cleanness of spoon was clean before and dirty afterwards", "composition of butter was whole before and melted afterwards", "state of butter was solid before and liquid afterwards", "texture of milk was dry before and foamy afterwards", "location of milk was in the fridge before and in the bowl afterwards", "location of butter was in refrigerator before and in bowl afterwards", "state of butter was solid before and liquid afterwards", "location of butter was in the fridge before and in the bowl afterwards", "state of butter was solid before and liquid afterwards", "weight of bowl was lighter before and heavier afterwards", "fullness of bowl was empty before and full afterwards"]}
{"id": "\ufeffHow to Make Pancakes|4", "answers": ["location of pan was on stove before and in the off position afterwards", "temperature of frying pan was cool before and hot afterwards", "temperature of pan was cool before and hot afterwards", "temperature of frying pan was cold before and hot afterwards", "state of butter was solid before and liquid afterwards", "temperature of frying pan was cool before and hot afterwards", "power of stove was on before and off afterwards", "temperature of stove top was cold before and hot afterwards", "temperature of pan was cool before and hot afterwards", "texture of butter was solid before and melted afterwards", "state of stove was off before and on afterwards", "temperature of frying pan was cool before and hot afterwards", "temperature of oil was cool before and hot afterwards", "state of pan was off before and on afterwards."]}
{"id": "\ufeffHow to Make Pancakes|5", "answers": ["location of butter was in the fridge before and on the frying pan afterwards", "temperature of butter was cold before and hot afterwards", "state of butter was solid before and melted afterwards", "temperature of frying pan was cold before and hot afterwards", "cleanness of skillet was clean before and dirty afterwards", "composition of butter was solid before and liquid afterwards", "moisture of skillet was dry before and wet afterwards", "temperature of butter was room temperature before and hot afterwards", "texture of butter was solid before and melted afterwards", "cleanness of fork was clean before and dirty afterwards", "weight of frying pan was lighter before and heavier afterwards", "state of butter was solid before and liquid afterwards", "location of hand was at side before and on wheel afterwards."]}
{"id": "\ufeffHow to Make Pancakes|6", "answers": ["texture of mixture was soft before and firm afterwards", "temperature of pan was hot before and cool afterwards", "state of matter of flour was solid before and liquid afterwards", "color of batter was white before and browned afterwards", "temperature of pan was hot before and cool afterwards", "cooked or not of butter was raw before and cooked afterwards", "temperature of pan was cool before and hot afterwards", "texture of butter was raw before and golden afterwards", "temperature of batter was cooler before and hotter afterwards", "cooked or not of butter was raw before and cooked afterwards", "container of pan was empty before and fuller afterwards", "temperature of pan was cool before and hot afterwards", "state of batter was liquid before and solid afterwards."]}
{"id": "\ufeffHow to Make Pancakes|7", "answers": ["texture of batter was soft before and crunchy afterwards", "temperature of other side was hot before and cooler afterwards", "color of batter was white before and browned afterwards", "texture of mixture was chunky before and smooth afterwards", "color of filling was white before and golden afterwards", "composition of the other side was less cooked before and more cooked afterwards", "cooked or not of butter was raw before and cooked afterwards", "state of pan was cool before and hot afterwards", "temperature of other side was cool before and hot afterwards", "temperature of frying pan was cool before and hot afterwards", "shape of butter was round before and flat afterwards."]}
{"id": "How to Unclog a Toilet|1", "answers": ["location of the plunger was separate before and inserted into the bowl afterwards", "location of toilet bowl was in storage before and in use afterwards", "orientation of screwdriver was horizontal before and vertical afterwards", "state of toilet bowl was open before and occupied afterwards", "pressure of wall was dry before and gripping afterwards", "texture of bowl was smooth before and sticky afterwards", "emptiness of toilet bowl was empty before and filled with a little bit of liquid afterwards", "fullness of toilet bowl was empty before and full afterwards", "location of the plunger was outside of the bowl before and inside the bowl afterwards."]}
{"id": "How to Unclog a Toilet|2", "answers": ["state of hole was empty before and full afterwards", "location of the plunger was out of the hole before and inside the hole afterwards", "orientation of the toilet bowl was facing backwards before and facing upwards afterwards", "location of hand was by side of body before and on top of body afterwards"]}
{"id": "How to Unclog a Toilet|3", "answers": ["texture of mixture was wet before and dry afterwards", "volume of toilet was filled with liquid before and filled with less liquid afterwards", "state of the drain was wet before and dry afterwards", "cleanness of toilet was dirty before and clean afterwards", "volume of bowl was empty before and full afterwards", "wetness of toilet was wet before and dry afterwards", "state of toilet was dry before and wet afterwards."]}
{"id": "How to Make Rice Cakes|1", "answers": ["texture of rice was hard before and soft afterwards", "temperature of rice was cold before and hot afterwards", "location of hot water was in a bowl before and on the fingers afterwards", "fullness of bowl was full before and empty afterwards", "texture of sticky rice was hard before and soft afterwards", "location of liquid was in a bowl before and on the rice afterwards", "moisture of rice was dry before and wet afterwards", "location of sticky rice was in a bowl before and on the fingers afterwards"]}
{"id": "How to Make Rice Cakes|2", "answers": ["temperature of cake was room temperature before and cold afterwards", "temperature of cake was room temperature before and cool afterwards", "texture of rice was hard before and soft afterwards", "location of moist rice was on tray before and on cakes afterwards"]}
{"id": "How to Make Rice Cakes|3", "answers": ["location of oil was in the bottle before and in the skillet afterwards", "location of skillet was in storage before and in use afterwards", "temperature of oil was cool before and hot afterwards", "location of oil was in bottle before and in pan afterwards", "temperature of oil was cool before and hot afterwards", "fullness of oil bottle was more full before and less full afterwards", "odor of oil was plain smelling before and stinky afterwards", "location of olive oil was in the bottle before and in the skillet afterwards", "temperature of pan was cool before and hot afterwards", "location of skillet was in storage before and in use afterwards", "cleanness of skillet was clean before and dirty afterwards", "state of pan was empty before and full afterwards", "temperature of oil was cool before and hot afterwards", "state of wood was solid before and burning afterwards", "composition of oil was separate before and mixed afterwards", "moisture of oil was wet before and dry afterwards."]}
{"id": "How to Make Rice Cakes|4", "answers": ["state of the pan was on fire before and off afterwards", "temperature of oil was cooler before and hotter afterwards", "state of stove was on before and off afterwards", "temperature of oil was cool before and hot afterwards", "power of stove was on before and off afterwards", "temperature of oil was cool before and hot afterwards", "temperature of pan was cold before and hotter afterwards", "temperature of pan was cool before and hot afterwards", "temperature of oil was cool before and hot afterwards", "temperature of pan was hot before and hot afterwards", "temperature of pan was cooler before and hotter afterwards", "state of mixture was hot before and cool afterwards", "state of flame was absent before and present afterwards", "temperature of pan was hotter before and cooler afterwards."]}
{"id": "How to Make Rice Cakes|5", "answers": ["cleanness of pan was clean before and dirtier afterwards", "location of pan was on table before and in cupboard afterwards", "temperature of oil was hotter before and cooler afterwards", "temperature of oil was 212 degrees fahrenheit before and 212 degrees fahrenheit afterwards", "container of oil was in a bottle before and in the pan afterwards", "weight of pan was lighter before and heavier afterwards", "temperature of oil was 212 degrees fahrenheit before and 212 degrees fahrenheit afterwards", "temperature of pan was cool before and hot afterwards", "temperature of oil was 212 degrees fahrenheit before and 400 degrees fahrenheit afterwards."]}
{"id": "How to Make Rice Cakes|6", "answers": ["cleanness of spoon was clean before and dirty afterwards", "location of pan was in the cupboard before and on the table afterwards", "location of pan was on the counter before and on the stove afterwards", "temperature of oil was hotter before and cooler afterwards", "temperature of cake was hotter before and cooler afterwards", "temperature of oil was hotter before and cooler afterwards."]}
{"id": "How to Make Rice Cakes|7", "answers": ["temperature of cake was hot before and cooling afterwards", "weight of serving plate was lighter before and heavier afterwards", "weight of oil bottle was heavier before and lighter afterwards", "temperature of cake was hotter before and cooler afterwards", "location of cake was in the skillet before and on the plate afterwards."]}
{"id": "How to Revive a Dying Aloe Vera Plant|1", "answers": ["state of soil was disturbed before and cleared afterwards", "smell of air was smelly before and fragrant afterwards."]}
{"id": "How to Revive a Dying Aloe Vera Plant|2", "answers": ["moisture of soil was dry before and moist afterwards", "location of water was in hose before and in soil afterwards", "moisture of soil was dry before and moist afterwards", "fullness of water bottle was more full before and less full afterwards."]}
{"id": "How to Revive a Dying Aloe Vera Plant|3", "answers": ["moisture of soil was dry before and damp afterwards", "wetness of soil was dry before and moist afterwards", "state of water was off before and on afterwards", "moisture of soil was dry before and wet afterwards", "location of water was in the pipes before and on the leaves afterwards."]}
{"id": "How to Revive a Dying Aloe Vera Plant|4", "answers": ["moisture of soil was dry before and wet afterwards", "location of water was in hose before and on plants afterwards", "location of fertilizer was in container before and in soil afterwards", "wetness of plant was dry before and watered afterwards."]}
{"id": "How to Clean White Shoes|1", "answers": ["wetness of glass was dry before and wet afterwards", "weight of the container of warm water was heavier before and lighter afterwards", "state of the bowl was empty before and now filled with warm water afterwards", "wetness of bowl was dry before and wet afterwards", "state of soap mixture was dry before and wet afterwards", "volume of the bowl was less full before and fuller afterwards", "volume of bowl was empty before and full afterwards", "location of water was in tap before and in bowl afterwards", "composition of mixture was plain before and soapy wet afterwards", "state of soap bottle was closed before and open afterwards", "location of the soap was in a container before and in the bowl afterwards", "location of water was in faucet before and in bowl afterwards", "weight of the bowl was lighter before and heavier afterwards", "location of soap mixture was in the bottle before and in the bowl afterwards", "location of soap bottle was in the pantry before and on the counter top afterwards."]}
{"id": "How to Clean White Shoes|2", "answers": ["dryness of rubber was wet before and dry afterwards", "temperature of eraser was warm before and cool afterwards", "cleanness of rubber was dirty before and cleaned afterwards", "smell of mixture was odorless before and scented afterwards", "state of rubber was solid before and melted afterwards."]}
{"id": "How to Clean White Shoes|3", "answers": ["dampness of surface was dry before and wet with soap afterwards", "location of dirt was on surface before and on brush afterwards", "location of stain was in carpet before and on rag afterwards", "cleanness of brush was clean before and dirty afterwards", "dryness of rubber was dry before and wet afterwards", "state of toothbrush handle was dry before and wet afterwards", "location of dirty was on carpet before and on rag afterwards", "wetness of cleaning rag was dry before and wet afterwards", "location of soap was on the carpet before and on the brush afterwards."]}
{"id": "How to Clean White Shoes|4", "answers": ["location of water was in faucet before and on carpet afterwards", "location of towel was in drawer before and on counter afterwards", "moisture of faucet was dry before and wet afterwards", "weight of towel was lighter before and heavier afterwards", "cleanness of faucet was dirty before and clean afterwards", "wetness of stain was dry before and wet afterwards", "color of water was clear before and brown afterwards", "cleanness of rubber was dirty before and clean afterwards", "pressure of hand was relaxed before and gripping afterwards", "location of towel was on the table before and on the sink afterwards."]}
{"id": "How to Clean White Shoes|5", "answers": ["state of the surface was damp before and dry afterwards", "temperature of water was warm before and cool afterwards", "wetness of foot was wet before and dry afterwards", "temperature of water was warm before and cold afterwards."]}
{"id": "How to Fold a Towel Swan|1", "answers": ["orientation of bathroom was covered before and open afterwards"]}
{"id": "How to Fold a Towel Swan|2", "answers": ["shape of paper was flat before and folded afterwards", "shape of paper was flat before and folded afterwards", "shape of paper was flat before and folded afterwards", "state of paper was straight before and folded afterwards", "shape of towel was flat before and folded afterwards", "shape of folded paper was flat before and folded afterwards."]}
{"id": "How to Fold a Towel Swan|3", "answers": ["shape of paper was flat before and rolled afterwards", "state of towel was flat before and rolled afterwards", "shape of paper was flat before and folded afterwards."]}
{"id": "How to Fold a Towel Swan|4", "answers": ["shape of paper was flat before and folded afterwards", "shape of paper was flat before and folded afterwards"]}
{"id": "How to Fold a Towel Swan|5", "answers": ["orientation of corner was straight before and turned afterwards", "location of hand was on keyboard before and on pillow afterwards", "shape of paper was flat before and creased afterwards", "shape of paper was flat before and elongated afterwards", "shape of paper was flat before and stretched afterwards."]}
{"id": "How to Make a Vodka Watermelon|1", "answers": ["shape of watermelon was whole before and sliced afterwards", "location of bottle cap was on the bottle before and off the bottle afterwards", "moisture of bottle was dry before and wet afterwards", "cleanness of cap was clean before and dirty afterwards", "orientation of watermelon was on counter before and on rind afterwards", "location of watermelon was in fridge before and on rim afterwards", "cleanness of bottle was clean before and dirty afterwards", "cleanness of ring was clean before and covered in watermelon afterwards", "moisture of rind was dry before and wet afterwards", "shape of watermelon was intact before and cut afterwards", "state of watermelon was whole before and sliced afterwards", "shape of watermelon was intact before and cut afterwards", "state of watermelon was whole before and cut afterwards."]}
{"id": "How to Make a Vodka Watermelon|2", "answers": ["state of watermelon was whole before and cut afterwards", "shape of watermelon was intact before and cut with a circle afterwards", "size of watermelon was whole before and cut up afterwards", "state of hole was absent before and present afterwards", "location of pencil was on the table before and in hand afterwards", "shape of watermelon was whole before and cut in half afterwards", "shape of watermelon was intact before and cut afterwards."]}
{"id": "How to Make a Vodka Watermelon|3", "answers": ["location of skewer was in kitchen before and in watermelon afterwards", "cleanness of skewer was clean before and dirty afterwards", "organization of watermelon was whole before and cut up afterwards", "moisture of skewer was dry before and wet afterwards", "shape of watermelon was intact before and cut afterwards", "moisture of knife was dry before and wet afterwards", "location of skewer was on counter before and in pot afterwards", "shape of watermelon was whole before and hole afterwards", "moisture of skewer was dry before and wet afterwards", "moisture of ring was wet before and dry afterwards."]}
{"id": "How to Make a Vodka Watermelon|4", "answers": ["location of vodka was in bottle before and in container afterwards", "color of watermelon was white before and pink afterwards", "weight of bottle was heavy before and light afterwards", "color of watermelon was clear before and lavender green afterwards", "fullness of funnel was empty before and full afterwards", "location of vodka was in the bottle before and in the bowl afterwards", "moisture of bowl was dry before and wet afterwards", "moisture of mixing tool was dry before and wet afterwards", "weight of container was heavy before and light afterwards", "location of vodka was in bottle before and in watermelon afterwards", "weight of bowl was lighter before and heavier afterwards", "cleanness of funnel was clean before and dirty afterwards", "cleanness of fruit was clean before and dirty afterwards", "fullness of bottle was full before and empty afterwards", "volume of bottle was full before and empty afterwards."]}
{"id": "How to Make a Vodka Watermelon|5", "answers": ["location of vodka was in bottle before and in watermelon afterwards", "location of vodka was in bottle before and in watermelon afterwards", "moisture of funnel was dry before and wet afterwards", "state of watermelon was plain before and infused afterwards", "volume of bottle was full before and empty afterwards", "taste of watermelon was bland before and infused with vodka afterwards", "wetness of funnel was dry before and wet afterwards."]}
{"id": "How to Make a Vodka Watermelon|6", "answers": ["temperature of watermelon was hot before and cool afterwards", "temperature of vodka bottle was room temperature before and cold afterwards", "location of vodka watermelon was in refrigerator before and in freezer afterwards", "texture of watermelon was soft before and crunchy afterwards", "fullness of fridge was more full before and less full afterwards", "location of vodka was in the bottle before and in the watermelon afterwards", "temperature of watermelon was warm before and cold afterwards", "fullness of vodka bottle was more full before and less full afterwards", "state of watermelon was raw before and cooked afterwards."]}
{"id": "How to Make a Vodka Watermelon|7", "answers": ["location of vodka watermelon was in fridge before and outside fridge afterwards", "moisture of vodka was wet before and dry afterwards", "temperature of vodka watermelon drink was warm before and cold afterwards", "state of watermelon was liquid before and solid afterwards."]}
{"id": "How to Make Egg White Omelet|1", "answers": ["temperature of olive oil was cold before and hot afterwards", "location of skillet was in the cabinet before and on stove top afterwards", "power of stove was off before and on afterwards", "state of olive oil was cool before and warm afterwards", "temperature of pan was cool before and hot afterwards", "temperature of oil was room temperature before and hot afterwards", "texture of olive oil was hard before and soft afterwards", "location of oil was in bottle before and in pan afterwards", "temperature of burner was off before and on afterwards", "state of pan was empty before and full afterwards", "odor of olive oil was plain smelling before and strong smelling afterwards", "temperature of olive oil was room temperature before and hot afterwards", "temperature of stove was cool before and hot afterwards."]}
{"id": "How to Make Egg White Omelet|2", "answers": ["taste of oil was plain before and sweet smelling afterwards"]}
{"id": "How to Make Egg White Omelet|3", "answers": ["wetness of ham was dry before and moist afterwards", "rawness of tomato was whole before and chopped afterwards", "shape of tomato was whole before and chopped afterwards", "temperature of olive oil was cool before and hot afterwards", "wholeness of tomato was whole before and chopped afterwards", "location of chopped tomato was in the fridge before and on the cutting board afterwards", "temperature of olive oil was cool before and hot afterwards."]}
{"id": "How to Make Egg White Omelet|4", "answers": ["cleanness of spoon was clean before and dirty afterwards", "temperature of stovetop was hot before and cooler afterwards", "location of mixture was in pot before and in bowl afterwards", "temperature of mixture was warm before and cooler afterwards", "temperature of omelet was hot before and cooler afterwards", "temperature of cheese was hot before and cooler afterwards", "volume of pot was full before and empty afterwards", "temperature of ham was hot before and cooler afterwards", "location of mixture was in pot before and in bowl afterwards", "volume of burner was full before and empty afterwards", "temperature of olive oil was hot before and cooler afterwards", "temperature of cheese was hot before and cool afterwards", "state of stove was off before and on afterwards", "volume of pot was full before and empty afterwards", "state of cheese was in block before and shredded afterwards."]}
{"id": "How to Make Egg White Omelet|5", "answers": ["cleanness of bowl was clean before and dirty afterwards", "texture of mixture was thinner before and thicker afterwards", "cleanness of spoon was clean before and dirty afterwards", "location of mixture was in bowl before and in pan afterwards", "temperature of skillet was cool before and hot afterwards", "texture of ham was firm before and soft afterwards", "volume of bowl was empty before and full afterwards", "location of mixture was in bowl before and in pan afterwards", "cleanness of spoon was clean before and dirty afterwards."]}
{"id": "How to Make Egg White Omelet|6", "answers": ["texture of mixture was runny before and smoother afterwards", "temperature of mixture was hot before and cooler afterwards", "thickness of mixture was runny before and thicker afterwards", "cleanness of spoon was clean before and dirty afterwards", "texture of mixture was runny before and thickened afterwards", "temperature of mixture was cool before and hot afterwards."]}
{"id": "How to Make Egg White Omelet|7", "answers": ["temperature of half of omelet was hotter before and cooler afterwards", "temperature of mixture was hot before and cooler afterwards", "volume of skillet was full of olive oil before and empty afterwards", "temperature of pan was hotter before and cooler afterwards", "location of half of the omelet was in the skillet before and in the bowl afterwards", "location of omelet was on the counter before and in the pan afterwards", "emptiness of skillet was full of olive oil before and empty afterwards."]}
{"id": "How to Make Egg White Omelet|8", "answers": ["location of filling was in skillet before and in bowl afterwards", "temperature of filling was hot before and cool afterwards", "shape of mixture was flat before and folded afterwards", "texture of filling was thinner before and thicker with omelet afterwards", "location of spatula was in drawer before and on stove top afterwards", "cleanness of spatula was clean before and dirty afterwards", "volume of pan was full before and empty afterwards", "location of mixture was in pot before and in bowl afterwards", "texture of mixture was runny before and smoother afterwards", "cleanness of spoon was clean before and dirty afterwards", "temperature of mixture was hotter before and cooler afterwards."]}
{"id": "How to Cook BBQ Ribs|1", "answers": ["location of money was in purse before and at shop afterwards", "state of decision of which ribbons to purchase was unmade before and made afterwards."]}
{"id": "How to Cook BBQ Ribs|2", "answers": ["cleanness of pan was clean before and dirty afterwards", "location of water was in pipes before and in bowl afterwards", "movement of water was still before and flowing afterwards", "location of mixing bowl was in the cupboard before and on the table afterwards", "emptiness of bowl was empty before and full afterwards"]}
{"id": "How to Cook BBQ Ribs|3", "answers": ["cleanness of spoon was clean before and dirty afterwards", "mop of mixture was in bowl before and in mop afterwards", "composition of mop was separate before and mixed afterwards", "location of mop was in package before and in hands afterwards", "openness of package was closed before and open afterwards", "cleanness of mop was clean before and dirty afterwards", "state of mop was unmade before and made afterwards."]}
{"id": "How to Cook BBQ Ribs|4", "answers": ["location of bob was above chest before and below chest afterwards", "state of blouse was uncovered before and covered afterwards", "state of bottom was bare before and covered afterwards"]}
{"id": "How to Cook BBQ Ribs|5", "answers": ["location of food was on grill before and on table afterwards", "temperature of grill was cold before and hotter afterwards", "temperature of grill was room temperature before and hot afterwards", "power of grill was off before and on afterwards", "coverage of barbecue was bare before and covered afterwards", "temperature of barbecue was room temperature before and hot afterwards"]}
{"id": "How to Make Kraft Macaroni and Cheese|1", "answers": ["temperature of saucepan was room temperature before and boiling afterwards", "location of water was in the measuring cup before and in the pan afterwards", "power of stove was off before and on afterwards", "fullness of saucepan was empty before and full afterwards", "wetness of pan was dry before and wet afterwards", "state of stove was off before and on afterwards", "location of water was in the measuring cup before and in the pan afterwards", "temperature of saucepan was cool before and hot afterwards", "temperature of water was cool before and hotter afterwards", "temperature of pan was cool before and hot afterwards", "temperature of saucepan was cold before and hot afterwards", "weight of saucepan was lighter before and heavier afterwards", "cleanness of measuring cup was clean before and dirty afterwards."]}
{"id": "How to Make Kraft Macaroni and Cheese|2", "answers": ["texture of macaroni was hard before and soft afterwards", "power of stove was off before and on afterwards", "texture of macaroni was hard before and soft afterwards", "texture of macaroni was hard before and soft afterwards", "temperature of macaroni was cool before and hot afterwards", "texture of mixture was hard before and soft afterwards", "texture of macaroni was hard before and softer afterwards", "state of macaroni was raw before and cooked afterwards", "location of macaroni was on counter before and in pan afterwards."]}
{"id": "How to Make Kraft Macaroni and Cheese|3", "answers": ["weight of macaroni was heavier before and lighter afterwards", "location of water was in a pot before and in the sink afterwards", "location of macaroni was on counter before and in drain afterwards", "location of water was in bowl before and in drain afterwards", "location of macaroni was in container before and in drain afterwards", "volume of pot was full before and empty afterwards", "moisture of drain was dry before and wet afterwards", "weight of bowl was heavy before and light afterwards", "cleanness of towel was clean before and dirty afterwards", "moisture of macaroni was wet before and dry afterwards", "wetness of macaroni was wet before and dry afterwards."]}
{"id": "How to Make Kraft Macaroni and Cheese|4", "answers": ["location of milk was in a container before and in the saucepan afterwards", "location of cheese sauce was in its container before and in pot afterwards", "state of macaroni was full before and empty afterwards", "weight of saucepan was lighter before and heavier afterwards", "temperature of saucepan was room temperature before and hot afterwards", "location of macaroni was in the fridge before and on the counter afterwards", "location of saucepan was in storage before and in use afterwards", "location of milk was in carton before and in pot afterwards", "temperature of macaroni was cold before and hot afterwards", "temperature of saucepan was cool before and hot afterwards", "container of saucepan was holding ingredients before and empty afterwards."]}
{"id": "How to Make Kraft Macaroni and Cheese|5", "answers": ["texture of macaroni was thick before and thinner afterwards", "location of macaroni was in the pot before and in the bowl afterwards", "location of saucepan was on the counter before and on top of the stove top afterwards", "composition of macaroni was whole before and broken afterwards", "location of spoon was in the drawer before and in the saucepan afterwards."]}
{"id": "How to Make Kraft Macaroni and Cheese|6", "answers": ["location of macaroni was in pan before and in refrigerator afterwards", "weight of fridge was lighter before and heavier afterwards", "fullness of saucepan was full before and empty afterwards", "location of macaroni was on stove before and in refrigerator afterwards", "location of macaroni was on stove top before and in refrigerator afterwards", "weight of saucepan was heavier before and lighter afterwards", "fullness of fridge was emptier before and fuller afterwards."]}
{"id": "\ufeffCharge an iPhone|1", "answers": ["state of cable was unplugged before and plugged afterwards", "electric conductivity of charger was unplugged before and plugged in afterwards", "state of cable was unplugged before and plugged in afterwards."]}
{"id": "\ufeffCharge an iPhone|2", "answers": ["location of usb port was missing before and found afterwards", "state of port was plugged in before and unplugged afterwards", "orientation of usb port was plugged into wall before and plugged in afterwards."]}
{"id": "\ufeffCharge an iPhone|3", "answers": ["state of usb port was unplugged before and plugged in afterwards", "state of cable was unplugged before and plugged in afterwards", "power of usb port was off before and on afterwards", "location of cable was loose before and in box afterwards", "power of usb port was off before and on afterwards."]}
{"id": "\ufeffCharge an iPhone|4", "answers": ["weight of your battery was lighter before and heaver afterwards", "state of cable was loose before and taut afterwards", "orientation of cable was on the table before and on the phone afterwards", "state of your phone was unattached before and attached afterwards", "location of cable was on the table before and in the hand afterwards", "tightness of cable was slack before and taut afterwards."]}
{"id": "\ufeffCharge an iPhone|5", "answers": ["electric conductivity of battery was charging before and disconnected afterwards", "state of charging was unperformed before and performed afterwards", "location of the icon was off the screen before and on the screen afterwards", "brightness of screen was dark before and bright afterwards."]}
{"id": "\ufeffCharge an iPhone|6", "answers": ["There will be no change."]}
{"id": "Cut Iceberg Lettuce|1", "answers": ["state of the machine was containing a chip before and now free from the chip afterwards", "location of the core was in the chip before and out of the chip afterwards", "state of aeons was alive before and dead afterwards", "location of chip was attached before and removed afterwards", "weight of the machine was lighter before and heavier afterwards", "location of the inner silicon was attached to the chip before and removed from the chip afterwards", "location of chip was inside before and outside afterwards", "composition of mainboard was intact before and missing the core afterwards", "location of coolant was in cooler before and on table afterwards."]}
{"id": "Cut Iceberg Lettuce|2", "answers": ["There will be no change."]}
{"id": "Cut Iceberg Lettuce|3", "answers": ["size of length was longer before and shorter afterwards", "size of head was whole before and cut in half afterwards", "composition of head was whole before and cut afterwards", "state of the head was whole before and cut in half afterwards", "shape of the head was long before and shorter afterwards", "length of the head was longer before and shorter afterwards."]}
{"id": "Open a Coconut|1", "answers": ["temperature of oven was cold before and hot afterwards", "location of heat was absent before and in oven afterwards", "temperature of oven was cold before and preheated afterwards", "power of oven was off before and on afterwards", "state of oven was off before and on afterwards", "electric conductivity of oven was turned off before and turned on afterwards", "temperature of oven was cold before and hot afterwards."]}
{"id": "Open a Coconut|2", "answers": ["temperature of pan was room temperature before and preheated afterwards", "state of the pan was empty before and filled with coconut afterwards", "temperature of pan was cold before and hot afterwards", "location of coconut was on counter before and on pan afterwards", "shape of coconut was raw before and baked afterwards", "temperature of pan was cold before and hot afterwards", "placement of the coconut was off the pan before and on the pan afterwards", "temperature of pan was room temperature before and preheated afterwards", "temperature of coconut was cold before and hot afterwards", "location of coconut was on counter before and on pan afterwards."]}
{"id": "Open a Coconut|3", "answers": ["location of coconut was on pan before and in towel afterwards", "state of coconut was on counter before and towel afterwards", "state of coconut was on pan before and in towel afterwards", "moisture of towel was dry before and wet afterwards", "location of coconut was on the counter before and in the pan afterwards", "covering of pan was bare before and covered afterwards", "location of towel was on the counter before and in the pan afterwards", "covering of pan was bare before and wrapped afterwards", "location of coconut was on counter before and in pan afterwards."]}
{"id": "Open a Coconut|4", "answers": ["hardness of surface was soft before and hard afterwards", "state of baking pan was uncovered before and covered in coconut oil afterwards", "location of coconut oil was in its container before and on the baking sheet afterwards", "covering of baking pan was bare before and covered with coconut oil afterwards", "location of baking sheet was in the cupboard before and on the table afterwards", "location of coconut was in oven before and in garbage bag afterwards", "weight of frying pan was lighter before and heavier afterwards", "hardness of surface was soft before and hard afterwards", "texture of pan was smooth before and sticky afterwards", "temperature of baking pan was cool before and hot afterwards", "cleanness of frying pan was clean before and dirty afterwards", "cleanness of towel was clean before and dirty afterwards", "location of coconut oil was in container before and on baking sheet afterwards."]}
{"id": "Open a Coconut|5", "answers": ["cleanness of knife was clean before and dirty afterwards", "orientation of meat was on counter horizontally before and on opposite side afterwards", "location of knife was on counter before and between shell afterwards", "location of coconut was in pan before and on counter afterwards", "cleanness of plate was clean before and dirty afterwards", "location of coconut was pan before and on plate afterwards", "shape of coconut was inside shell before and shredded afterwards", "location of knife was in hand before and between the shells afterwards."]}
{"id": "Open a Coconut|6", "answers": ["texture of coconut meat was smooth before and sticky afterwards", "location of fruit was on the cutting board before and in the coconut meat afterwards", "cleanness of cutting board was clean before and dirty afterwards", "location of coconut was in pan before and removed from pan afterwards", "composition of coconut was whole before and peeled afterwards", "cleanness of cutting board was clean before and dirty afterwards", "texture of coconut meat was sticky before and smooth afterwards", "location of coconut was in pan before and out of pan afterwards."]}
{"id": "Snap Your Fingers|1", "answers": ["orientation of thumb was straight before and curved afterwards", "state of thumb was at your side before and at middle finger afterwards", "pressure of thumb was relaxed before and squeezing afterwards", "state of the thumb was at its middle before and pressed afterwards."]}
{"id": "Snap Your Fingers|2", "answers": ["location of pinky was curled up before and flattened out afterwards", "location of finger was in the air before and on the ring finger afterwards", "state of the ring finger was straight before and now curved afterwards", "pressure of thumb was relaxed before and pressed afterwards", "shape of ring finger was straight before and with pinky afterwards", "state of finger was straight before and pressed afterwards", "location of pinky was curled before and straight afterwards."]}
{"id": "Snap Your Fingers|3", "answers": ["pressure of thumb pressure was lower before and higher afterwards", "pressure of middle finger was loose before and tightened afterwards", "density of pressure was nonexistent before and compressed afterwards", "location of middle finger was on the table before and in front of the finger afterwards."]}
{"id": "Snap Your Fingers|4", "answers": ["speed of finger motion was consistent before and fast afterwards."]}
{"id": "Snap Your Fingers|5", "answers": ["motion of finger motion was stationary before and rotating afterwards", "complexity of motion was static before and dynamic afterwards", "skill of person was memorizing the motion before and memorizing the snap afterwards."]}
{"id": "Grow Grass|1", "answers": ["state of seed was unselected before and selected afterwards", "color of seed was brown before and green afterwards"]}
{"id": "Grow Grass|2", "answers": ["There will be no change."]}
{"id": "Grow Grass|3", "answers": ["knowledge of soil's pH level was unknown before and known afterwards", "moisture of soil was dry before and wet afterwards", "knowledge of soil's pH level was unmeasured before and measured afterwards."]}
{"id": "Grow Grass|4", "answers": ["location of paste was in package before and on the table afterwards", "state of the soil was unprepared before and amended afterwards", "location of salt was in container before and on mixture afterwards", "knowledge of soil's pH level was unassessed before and assessed afterwards."]}
{"id": "Grow Grass|5", "answers": ["shape of ground was looser before and compacted afterwards", "size of ground was looser before and compacted afterwards", "shape of soil was round shaped before and looser afterwards", "location of soil was in the bag before and on the ground afterwards", "shape of ground was compacted before and compacted afterwards."]}
{"id": "Grow Grass|6", "answers": ["weight of hand was empty before and holding a small quantity of soil afterwards", "state of grade was unnegotiated before and negotiated afterwards", "location of soil was in old home before and in new home afterwards", "location of soil was in store before and in grade afterwards", "state of soil was ungrown before and mature afterwards", "quantity of soil was insufficient before and more afterwards", "state of grade was unnegotiated before and negotiated afterwards", "state of soil was ungrown before and mature afterwards", "age of soil was old before and new afterwards", "quantity of soil was low before and high/or appropriate afterwards."]}
{"id": "Grow Grass|7", "answers": ["state of soil was stagnant before and spread afterwards", "location of grass seed was in bag before and in soil afterwards", "location of grass seed was in hand before and on the ground afterwards."]}
{"id": "Grow Grass|8", "answers": ["fertilizing of soil was compacted before and spread afterwards", "location of fertilizer was in bag before and on ground afterwards", "state of soil was uninspected before and inspected afterwards", "state of soil was stagnant before and spread afterwards."]}
{"id": "Grow Grass|9", "answers": ["location of material was in shop before and in hands afterwards", "orientation of grass seed was bare before and covered afterwards", "covering of seed was bare before and covered afterwards"]}
{"id": "Grow Grass|10", "answers": ["state of lawn was uncovered before and covered afterwards", "strength of grass seed was stronger before and weaker afterwards", "location of grass seed was on the counter before and over the grass afterwards"]}
{"id": "Grow Grass|11", "answers": ["state of lawn mower was off before and on afterwards", "location of grass mower was on the lawn before and in the mower afterwards", "moisture of mower was dry before and wet afterwards", "location of grass mower was in garage before and outside afterwards", "grass mower angle of view was vertical before and horizontal afterwards", "duration of mow was in power before and off afterwards."]}
{"id": "Germinate Tree Seeds|1", "answers": ["weight of the pot was lighter before and heavier afterwards", "composition of soil was stagnant before and composted afterwards", "location of compost was loose before and in pot afterwards", "weight of the pot was lighter before and heavier afterwards", "volume of pot was empty before and full afterwards", "weight of the pot was lighter before and heavier afterwards."]}
{"id": "Germinate Tree Seeds|2", "answers": ["weight of the pot was lighter before and heavier afterwards", "volume of pot was empty before and full afterwards", "weight of seeds container was heavier before and lighter afterwards", "volume of pot was empty before and full afterwards."]}
{"id": "Germinate Tree Seeds|3", "answers": ["temperature of pot was warm before and cool afterwards", "location of pot was indoors before and outdoors afterwards"]}
{"id": "Germinate Tree Seeds|4", "answers": ["covering of pot was exposed before and covered afterwards", "location of wire mesh was loose before and on the plants afterwards", "location of wire mesh was on roll before and on pot afterwards."]}
{"id": "Germinate Tree Seeds|5", "answers": ["location of water was in the pipes before and in the soil afterwards", "weight of the pot was lighter before and heavier afterwards", "volume of the pot was less full before and fuller afterwards", "moisture of soil was dry before and damp afterwards", "location of water was in pipes before and in soil afterwards."]}
{"id": "Germinate Tree Seeds|6", "answers": ["There will be no change."]}
{"id": "Tie River Tubes Together|1", "answers": ["location of braided water resistant rope was at store before and at home afterwards", "location of rope was at store before and at home afterwards", "ownership of rope was at store before and bought by you afterwards", "coverage of ground was bare before and covered with rope afterwards", "location of rope was at store before and at home afterwards", "resistance of rope was movable before and resisted afterwards", "location of braided water-resistant rope was at store before and at home afterwards."]}
{"id": "Tie River Tubes Together|2", "answers": ["knowledge of tube was unknown before and measured afterwards", "location of measuring tape was on the drawer before and on the hands afterwards", "step of measured distance was uncut before and cut afterwards", "state of rope was untied before and tied afterwards", "length of rope was long before and cut into shorter pieces afterwards", "state of tube was untied before and tied afterwards", "length of rope was long before and cut into shorter pieces afterwards", "location of measuring tape was on the drawer before and on the hands afterwards", "length of rope was long before and short afterwards."]}
{"id": "Tie River Tubes Together|3", "answers": ["location of rope was outside tube before and inside tube afterwards", "volume of tube was empty before and full afterwards", "composition of tube was empty before and covered in rope afterwards", "location of rope was outside the tube before and inside the tube afterwards", "location of rope was in bucket before and on sink afterwards", "shape of rope was straight before and looped afterwards", "orientation of rope was in hands before and tied around the tube afterwards."]}
{"id": "Tie River Tubes Together|4", "answers": ["shape of rope was rolled up before and tied in hole afterwards", "depth of tube was 1/2 full before and filled afterwards", "location of rope was outside tube before and in tube afterwards", "state of tube was dry before and wet afterwards", "shape of rope was straight before and tied afterwards", "location of rope was outside hole before and in tube afterwards."]}
{"id": "Tie River Tubes Together|5", "answers": ["tightness of rope was loose before and tight afterwards", "knot of rope was untied before and tied afterwards", "shape of rope was loose before and tied afterwards", "location of rope was in tube before and tied up afterwards", "shape of rope was straight before and knotted afterwards."]}
{"id": "Tie River Tubes Together|6", "answers": ["volume of tube was loose before and tied afterwards", "location of rope was outside tube before and in tube afterwards", "shape of rope was untied before and tied afterwards", "weight of tube was light before and heavy afterwards", "location of tube was in cupboard before and in tube afterwards", "location of rope was outside tube before and in tube afterwards", "state of tube was loose before and tied afterwards."]}
{"id": "Snorkel in water|1", "answers": ["knowledge of snorkel definition was unknown before and known afterwards", "pressure of back was loose before and tight afterwards", "location of mask was in the drawer before and on the head afterwards", "knowledge of knowledge of what \"shorkel\" (oral masking device) is was absent before and is present afterwards", "location of mask was in drawer before and on face afterwards", "availability of skateboard was absent before and present afterwards", "feel of body was loose before and comfortable afterwards", "position of mask was up before and down afterwards", "texture of skin was dry before and sweaty afterwards."]}
{"id": "Snorkel in water|2", "answers": ["location of mask was off person before and on person afterwards", "state of strap was open before and closed afterwards", "state of the strap was being held before and now removed afterwards", "placement of mask was unworn before and worn afterwards", "state of mouth was uncovered before and covered afterwards", "location of mask was off of the person before and on the person afterwards", "location of mask was on the person before and on the face afterwards", "state of strap was open before and sealed afterwards", "weight of mask was light before and heavy afterwards", "shape of mask was open before and closed afterwards", "location of mask was in drawer before and in hands afterwards", "location of mask was on the person before and on the face afterwards", "location of mask was unattached before and attached afterwards."]}
{"id": "Snorkel in water|3", "answers": ["temperature of stomach was colder before and warmer afterwards", "state of stomach was uncovered before and covered in food afterwards", "location of stomach was in the water before and on the ground afterwards", "location of mask was on table before and on stomach afterwards", "state of stomach was empty before and full afterwards", "location of blanket was on the bed before and on the stomach afterwards", "weight of stomach was light before and heavier afterwards", "location of water was in faucet before and in stomach afterwards"]}
{"id": "Snorkel in water|4", "answers": ["cleanness of mouthpiece was clean before and filled with venomous fish afterwards", "location of venomous fish was off the mouthpiece before and on the mouthpiece afterwards", "location of mouthpiece was in water before and underwater afterwards", "mouth of mouthpiece was underwater before and in water afterwards", "breathrate of breathing was slow before and steady afterwards", "texture of mouth was dry before and moist afterwards", "shape of mouthpiece was open before and closed afterwards", "location of venomous fish was on the mouth before and in the water afterwards."]}
{"id": "Snorkel in water|5", "answers": ["location of mouthpiece was in air before and in tube afterwards", "state of mouth was open before and closed afterwards", "state of tube was punctured before and repaired afterwards", "location of breathing was in before and out afterwards", "state of stomach was empty before and full afterwards", "volume of stomach was empty before and full afterwards."]}
{"id": "Snorkel in water|6", "answers": ["shape of stomach was tanked before and expanded afterwards", "state of vest was unworn before and worn afterwards", "location of vest was in closet before and in your dressing area afterwards", "location of stomach was in port before and out of port afterwards", "location of belt was in hand before and in vest afterwards", "shape of stomach was rounder before and flat afterwards", "location of mask was on the person before and on the person's body afterwards."]}
{"id": "Cook Diced Beef|1", "answers": ["weight of pan was heavier before and lighter afterwards", "state of meat was whole before and cut afterwards", "composition of fat was in pieces before and removed afterwards", "state of meat was fat free before and covered in fat afterwards", "location of fat was on meat before and off meat afterwards", "composition of meat was whole before and shredded afterwards", "cleanness of knife was clean before and dirty afterwards", "weight of pan was heavier before and lighter afterwards", "length of meat was longer before and shorter afterwards", "size of meat was thicker before and thinner afterwards", "state of meat was whole before and cut afterwards."]}
{"id": "Cook Diced Beef|2", "answers": ["composition of meat was whole before and sliced afterwards", "fullness of cutting board was full before and empty afterwards", "shape of meat was whole before and diced afterwards", "cleanness of cutting board was clean before and dirty afterwards", "size of meat was whole before and diced afterwards", "moisture of knife was dry before and wet afterwards", "shape of meat was whole before and diced afterwards."]}
{"id": "Cook Diced Beef|3", "answers": ["location of salt was in a container before and in the bowl afterwards", "location of flour was in packet before and in bowl afterwards", "volume of bowl was empty before and full afterwards", "fullness of bowl was empty before and fuller afterwards", "weight of bowl was light before and heavy afterwards", "cleanness of bowl was clean before and dirty afterwards", "fullness of mixing bowl was empty before and fuller afterwards", "moisture of bowl was dry before and wet afterwards", "cleanness of spoon was clean before and dirty afterwards", "wetness of mixing bowl was dry before and wet afterwards", "moisture of spoon was dry before and wet afterwards", "weight of bowl was light before and heavy afterwards."]}
{"id": "Cook Diced Beef|4", "answers": ["state of stove was off before and on afterwards", "temperature of beef was cool before and hot afterwards", "temperature of skillet was cold before and hot afterwards", "power of stove was off before and on afterwards", "state of oil was cool before and hot afterwards", "cleanness of skillet was clean before and dirty afterwards", "temperature of beef was cold before and hotter afterwards", "wetness of frying pan was dry before and wet afterwards", "location of oil was in bottle before and in pan afterwards", "temperature of stove burner was cool before and hot afterwards", "electric conductivity of stove was off before and on afterwards", "cooking of beef was uncooked before and cooked afterwards", "cleanness of oil pan was clean before and dirty afterwards", "texture of beef was raw before and cooked afterwards."]}
{"id": "Cook Diced Beef|5", "answers": ["state of oil was off before and on afterwards", "volume of pan was empty before and full afterwards", "texture of beef was hard before and softer afterwards", "state of pan was empty before and full afterwards", "temperature of beef was cold before and hotter afterwards", "temperature of stove was cold before and hot afterwards", "texture of mixture was lumpy before and smoother afterwards", "temperature of meat was cool before and hot afterwards."]}
{"id": "Cook Diced Beef|6", "answers": ["location of seasoning was in the cooking pan before and in the dishes afterwards", "moisture of seasoning was wet before and dry afterwards", "ownership of seasoning was owned by store before and bought by you afterwards", "shape of meat was uncut before and cut into cubes afterwards", "moisture of pan was wet before and dry afterwards", "cleanness of plate was clean before and dirty afterwards", "moisture of meat was wet before and dry afterwards."]}
{"id": "Cook Diced Beef|7", "answers": ["moisture of beef was dry before and wet afterwards", "texture of beef was hard before and soft afterwards", "volume of pan was full before and empty afterwards", "temperature of beef was cool before and hot afterwards", "temperature of meat was cold before and hotter afterwards", "temperature of pot was cold before and hot afterwards", "texture of beef was raw before and cooked afterwards", "state of meat was uncooked before and cooked afterwards", "power of stove was off before and on afterwards."]}
{"id": "Cook Diced Beef|8", "answers": ["location of meat was on a plate before and in a bowl afterwards", "flavor of meat was plain before and seasoned afterwards", "composition of beef was plain before and topped off afterwards", "taste of meat was bland before and seasoned afterwards."]}
{"id": "Oven Cook Sausages|1", "answers": ["location of sausage was on counter before and in pan afterwards", "temperature of the sausage was cooler before and warmer afterwards", "location of sausage was in fridge before and in pan afterwards", "location of water was in pipes before and in pan afterwards", "location of sausage was on counter before and in pan afterwards", "temperature of pan was cool before and hot afterwards", "temperature of water was cold before and boiling afterwards"]}
{"id": "Oven Cook Sausages|2", "answers": ["temperature of oven was cold before and hot afterwards", "state of oven knob was off before and on afterwards", "temperature of oven was cool before and hot afterwards", "power of oven was off before and on afterwards", "temperature of stove was cold before and hot afterwards", "state of oven was off before and on afterwards", "temperature of sausage was cold before and hot afterwards", "temperature of oven was cold before and hot afterwards", "texture of sausage was raw before and cooked afterwards."]}
{"id": "Oven Cook Sausages|3", "answers": ["temperature of cutting board was cool before and hot afterwards", "state of sausage was whole before and cut afterwards", "cleanness of knife was clean before and dirty afterwards", "wetness of cutting board was dry before and wet afterwards", "cleanness of cutting board was clean before and dirty afterwards", "length of celery was long before and short afterwards", "size of sausage was whole before and cut into pieces afterwards", "cleanness of cutting board was clean before and dirty afterwards."]}
{"id": "Oven Cook Sausages|4", "answers": ["shape of foil was flat before and crumpled afterwards", "location of baking pan was in cupboard before and on counter afterwards", "container of loaf pan was empty before and full of foil afterwards", "location of foil was on roll before and on sausages afterwards", "shape of foil was flat before and crumpled afterwards", "cleanness of knife was clean before and dirty afterwards", "orientation of baking pan was free of foil before and lined with foil afterwards", "location of foil was on roll before and in pan afterwards", "container of baking pan was empty before and lined with foil afterwards", "moisture of pan was dry before and wet afterwards."]}
{"id": "Oven Cook Sausages|5", "answers": ["weight of baking pan was lighter before and heavier afterwards", "cleanness of wire rack was clean before and dirty afterwards", "location of wire rack was off the pan before and on top of the pan afterwards", "location of grease was in the pan before and on the sausages afterwards", "shape of wire was bundled before and bundled afterwards", "location of wire rack was in the cupboard before and on the counter top afterwards", "location of grease was on the sausages before and on the wire rack afterwards", "location of grease was on sausage before and in pan afterwards."]}
{"id": "Oven Cook Sausages|6", "answers": ["density of sausage was compacted before and aerated afterwards", "weight of pan was lighter before and heavier afterwards", "shape of sausage was rounded before and flat afterwards", "cleanness of wire rack was clean before and dirty afterwards", "cleanness of pan was clean before and dirty afterwards", "cleanness of pan was clean before and dirty afterwards", "shape of sausage was round before and flat afterwards."]}
{"id": "Oven Cook Sausages|7", "answers": ["temperature of sausage was raw before and cooked afterwards", "temperature of sausage was cold before and hot afterwards", "state of pan was empty before and full afterwards", "composition of sausage was raw before and cooked afterwards", "container of oven was empty before and full afterwards", "temperature of pan was cold before and hot afterwards", "temperature of sausage was raw before and cooked afterwards", "state of pan was empty before and full afterwards."]}
{"id": "Oven Cook Sausages|8", "answers": ["temperature of pan was hot before and cold afterwards", "state of sausage was raw before and cooked afterwards", "location of pan was on counter before and in oven afterwards", "location of celery was on the cutting board before and in the pan afterwards", "state of sausage was raw before and cooked afterwards."]}
{"id": "Oven Cook Sausages|9", "answers": ["texture of sausage was soft before and firmer afterwards", "fullness of pan was emptier before and fuller afterwards", "temperature of sausage was cold before and hot afterwards", "fullness of oven was less full before and more full afterwards", "fullness of oven was less full before and more full afterwards"]}
{"id": "Oven Cook Sausages|10", "answers": ["size of sausage was whole before and cut into cubes afterwards", "size of sausage was large before and smaller afterwards", "fullness of pan was less full before and more full afterwards", "emptiness of pan was empty before and full afterwards", "time of the time was earlier before and later afterwards", "texture of sausage was raw before and cooked afterwards", "weight of the pan was lighter before and heavier afterwards", "weight of pan was lighter before and heavier afterwards", "texture of sausage was raw before and cooked afterwards."]}
{"id": "Oven Cook Sausages|11", "answers": ["texture of sausage was harder before and softer afterwards", "fullness of fridge was more full before and less full afterwards", "color of sausage was pink before and browned afterwards", "location of sausage was out of oven before and in oven afterwards", "location of sausage was in the fridge before and in a pan afterwards."]}
{"id": "Oven Cook Sausages|12", "answers": ["size of sausage was whole before and sliced afterwards", "taste of sausage was bland before and tasty afterwards", "temperature of sausage was warm before and hot afterwards", "state of sausage was uncooked before and cooked afterwards", "temperature of pan was cold before and hot afterwards", "location of sausage was on counter before and in pan afterwards."]}
{"id": "Oven Cook Sausages|13", "answers": ["state of thermometer was off before and on afterwards", "power of thermometer was off before and on afterwards", "temperature of sausage was hot before and warm afterwards", "movement of meat was stationary before and moving afterwards", "shape of sausage was raw before and cooked afterwards", "state of sausage was raw before and cooked afterwards."]}
{"id": "Take a shower|1", "answers": ["location of clothing was on before and off afterwards", "position of back was straight before and hunched over afterwards"]}
{"id": "Take a shower|2", "answers": ["state of faucet was turned on before and turned off afterwards", "location of water was in hose before and in sink afterwards", "orientation of head was upright before and tilted up afterwards", "temperature of body was hot before and cooler afterwards", "temperature of water was cold before and hot afterwards", "pressure of body was hot before and cooled afterwards", "temperature of faucet was cold before and hot afterwards", "position of swimmer was on ground before and removed afterwards", "temperature of nozzle was cold before and hot afterwards."]}
{"id": "Take a shower|3", "answers": ["state of hand was open before and closed afterwards", "location of water was in faucet before and in sink afterwards", "location of water was in pipes before and in sink afterwards", "pressure of body was tense before and relaxed afterwards", "temperature of water was hot before and cool afterwards", "pressure of sink was under water before and under water afterwards."]}
{"id": "Take a shower|4", "answers": ["state of sink faucet was turned off before and turned on afterwards", "location of soap was in bottle before and in sink afterwards", "location of water was in faucet before and in sink afterwards", "location of water was in pipes before and in sink afterwards", "location of detergent was in bottle before and in sink afterwards", "location of hair dryer was in closet before and in hand afterwards", "location of soap was in bottle before and in sink afterwards."]}
{"id": "Take a shower|5", "answers": ["state of shirt was dry before and wet afterwards", "state of sink was empty before and full afterwards", "state of hair dryer was off before and on afterwards", "location of soap was in bottle before and on clothes afterwards", "moisture of towel was dry before and wet afterwards", "location of soap was in bottle before and in sink afterwards", "location of hair dryer was in the closet before and on the sink afterwards", "location of water was in pipes before and in drain afterwards."]}
{"id": "Take a shower|6", "answers": ["state of nozzle was dry before and wet afterwards", "location of water was in the pipes before and on the walls afterwards", "state of faucet was off before and on afterwards", "temperature of water was cold before and warm afterwards", "location of soap was in the bottle before and in the sink afterwards", "state of nozzle was dry before and wet afterwards", "state of nozzle was open before and closed afterwards", "moisture of nozzle was dry before and wet afterwards."]}
{"id": "Take a shower|7", "answers": ["state of body was wet before and dry afterwards", "state of hair was wet before and dry afterwards", "wetness of nozzle was wet before and dry afterwards", "location of hair was on body before and in drain afterwards", "location of water was in the nozzle before and in the dryer afterwards", "location of soap was in bottle before and on body afterwards."]}
{"id": "Take a photo|1", "answers": ["state of camera was closed before and open afterwards", "power of phone was off before and on afterwards", "openness of camera was closed before and open afterwards", "location of camera was in the cradle before and on the table afterwards", "state of camera was closed before and opened afterwards", "color of screen was black before and white afterwards", "power of phone was off before and on afterwards", "openness of camera was closed before and open afterwards."]}
{"id": "Take a photo|2", "answers": ["state of camera was off before and on afterwards", "step of camera was unset before and set up afterwards", "state of camera was off before and on afterwards", "camera of camera was turned off before and in use afterwards", "state of camera was off before and on afterwards."]}
{"id": "Take a photo|3", "answers": ["state of photo button was unclicked before and clicked afterwards", "power of camera was off before and on afterwards", "state of camera was off before and on afterwards", "state of photo button was unclicked before and clicked afterwards", "step of take photo button was unclicked before and clicked afterwards", "state of camera was off before and on afterwards", "location of camera was on the table before and in the camera box afterwards."]}
{"id": "Take a photo|4", "answers": ["state of photo was unentered before and entered afterwards", "location of phone was unconnected to the camera before and connected to the camera afterwards", "state of the photo was unentered before and entered afterwards", "state of button was unclicked before and clicked afterwards", "step of camera was unclicked before and clicked afterwards", "location of the photo was outside of the camera bubble before and inside the camera bubble afterwards."]}
{"id": "Buy a pen|1", "answers": ["location of game store was absent before and present afterwards"]}
{"id": "Buy a pen|2", "answers": ["location of pen was in the drawer before and in the hand afterwards", "ownership of pen was owned by the store before and owned by you afterwards", "location of pen was at the store before and in your house afterwards", "state of search on google for pen was unopened before and opened afterwards", "state of search box was closed before and open afterwards", "location of pen was at store before and at home afterwards."]}
{"id": "Buy a pen|3", "answers": ["step of cashier was at the store before and at the pen's place afterwards", "location of pen was in the cash register before and in the pen afterwards", "ownership of pen was owned by the store before and owned by the shopper afterwards", "pen location of pen was in store before and at pen's place afterwards", "ownership of money was in purse before and in pen afterwards", "action of pen was still before and in hand afterwards"]}
{"id": "Buy a pen|4", "answers": ["location of pen was in the store before and at the cashier's home afterwards", "ownership of pen was in store before and at your home afterwards", "cost of pen was on sale at store before and purchased from store afterwards", "location of pen was at store before and at home afterwards"]}
{"id": "Buy a pen|5", "answers": ["location of pen was at the store before and at home afterwards", "state of the pen was with you before and gone afterwards", "location of pen was with store before and with cashier afterwards"]}
{"id": "Make pancakes|1", "answers": ["moisture of bowl was dry before and wet afterwards", "volume of bowl was empty before and full afterwards", "power of mixer was off before and on afterwards", "moisture of bowl was dry before and wet afterwards", "wetness of bowl was dry before and wet afterwards", "temperature of egg yolk was cold before and melting afterwards", "location of egg was inside an egg shell before and removed from an egg shell afterwards", "moisture of bowl was dry before and wet afterwards", "state of mixing bowl was empty before and full afterwards", "wetness of egg yolk was dry before and wet afterwards"]}
{"id": "Make pancakes|2", "answers": ["location of butter was in refrigerator before and in bowl afterwards", "cleanness of bowl was clean before and dirty afterwards", "wetness of the bowl was dry before and wet afterwards", "power of mixer was off before and on afterwards", "electric conductivity of mixer was turned off before and turned on afterwards", "form of butter was solid before and liquid afterwards", "wetness of bowl was dry before and wetter afterwards", "fullness of bowl was empty before and full afterwards", "state of butter was solid before and melted afterwards", "shape of egg was shell before and cracked afterwards", "cleanness of bowl was clean before and dirty afterwards", "cleanness of spoon was clean before and dirty afterwards", "composition of eggshell was whole before and cracked afterwards", "composition of egg yolk was whole before and cracked afterwards", "state of the bowl was empty before and filled with butter afterwards"]}
{"id": "Make pancakes|3", "answers": ["location of milk was in a bottle before and in a bowl afterwards", "cleanness of bowl was clean before and dirty afterwards", "cleanness of bowl was clean before and dirty afterwards", "volume of butter bottle was full before and empty afterwards", "weight of bowl was lighter before and heavier afterwards", "state of butter was solid before and liquid afterwards", "volume of bowl was empty before and full afterwards", "location of milk was in carton before and in bowl afterwards", "weight of bowl was lighter before and heavier afterwards", "location of butter was in the fridge before and in the bowl afterwards", "location of butter was in the fridge before and in the bowl afterwards", "location of milk was in carton before and in bowl afterwards"]}
{"id": "Make pancakes|4", "answers": ["temperature of pan was cool before and hot afterwards", "state of pan was cold before and hot afterwards", "electric conductivity of stove burner was off before and on afterwards", "location of milk was in refrigerator before and in pan afterwards", "temperature of butter was room temperature before and heated afterwards", "state of butter was solid before and liquid afterwards", "state of butter was solid before and melted afterwards", "moisture of pan was dry before and wet afterwards", "power of stove burner was off before and on afterwards", "state of butter was solid before and liquid afterwards", "wetness of pan was dry before and wetter afterwards", "location of butter was in refrigerator before and in the pan afterwards", "temperature of butter was cold before and warm afterwards", "state of stove burner was off before and on afterwards."]}
{"id": "Make pancakes|5", "answers": ["cleanness of pan was clean before and dirty afterwards", "fullness of frying pan was empty before and fuller afterwards", "cleanness of frying pan was clean before and dirty afterwards", "temperature of mixture was cooler before and hotter afterwards", "location of batter was in a bowl before and on the pan afterwards", "location of batter was in a measuring cup before and on the frying pan afterwards", "temperature of butter was cool before and hot afterwards", "state of stove was off before and on afterwards", "cleanness of frying pan was clean before and dirty afterwards", "location of batter was in measuring cup before and on the griddle afterwards", "location of grease was in the pan before and on the griddle afterwards."]}
{"id": "Make pancakes|6", "answers": ["cooked status of brownie batter was raw before and cooked afterwards", "color of batter was whitish yellow before and browned brown afterwards", "location of mixture was in bowl with butter before and in pan with butter afterwards", "location of butter was in the fridge before and on the pan afterwards", "texture of griddle was soft before and crunchy afterwards", "cooked or not of egg was raw before and cooked afterwards", "time of the time was earlier before and later afterwards", "location of batter was in the bowl before and on the grill afterwards", "texture of cheese was firm before and soft afterwards", "taste of batter was inedible before and tasty afterwards."]}
{"id": "Make pancakes|7", "answers": ["location of batter was in the pan before and on the other side of the pan afterwards", "temperature of other side of the pan was cooler before and warmer afterwards", "taste of batter was plain before and greasy afterwards", "texture of batter was firm before and soft afterwards", "location of butter was in the fridge before and on the other side of the pan afterwards", "temperature of other side of pan was cold before and hot afterwards."]}
{"id": "Make pancakes|8", "answers": ["location of sauce was in the pan before and on the bread afterwards."]}
{"id": "Make paper airplane|1", "answers": ["location of money was in the drawer before and in the cash register afterwards", "location of paper was in the drawer before and in the hand afterwards", "ownership of paper was owned by the store before and owned by the shopper afterwards", "state of paper was for sale in store before and bought from store afterwards", "location of cash was in the wallet before and in the cash register afterwards", "location of money was in wallet before and in cash register afterwards", "state of paper was for sale in store before and bought from store afterwards"]}
{"id": "Make paper airplane|2", "answers": ["state of paper was in need of a paper crease before and in hand afterwards", "size of paper was whole before and in half afterwards", "location of paper was on table before and in hand afterwards", "size of paper was in fair share before and odd sized afterwards", "state of letter was uncut before and cut afterwards", "shape of paper was uncut before and cut afterwards."]}
{"id": "Make paper airplane|3", "answers": ["state of paper was a crease before and a fold afterwards", "location of paper was in package before and in hand afterwards", "shape of paper was flat before and folded afterwards", "shape of paper was straight before and creased afterwards", "location of paper was outside of crease before and in crease afterwards", "shape of letter was straight before and folded afterwards", "orientation of paper was flat before and folded afterwards", "state of crease was absent before and present afterwards", "location of ink was in pen before and on paper afterwards."]}
{"id": "Make paper airplane|4", "answers": ["location of bottom point was away from letter before and over letter afterwards", "state of paper was unheld before and held afterwards", "location of folded paper was in hand before and above letter afterwards", "state of letter spool was off before and on afterwards", "shape of paper was flat before and folded afterwards."]}
{"id": "Make paper airplane|5", "answers": ["state of paper was flat before and folded afterwards", "shape of paper was flat before and folded afterwards", "shape of paper was flat before and folded afterwards", "orientation of paper was straight before and folded afterwards", "shape of paper was flat before and folded afterwards."]}
{"id": "Make paper airplane|6", "answers": ["state of paper was flat before and folded afterwards", "shape of paper was flat before and folded afterwards", "state of paper was unfolded before and folded afterwards", "orientation of paper was straight before and folded afterwards", "length of paper was longer before and shorter afterwards."]}
{"id": "Make paper airplane|7", "answers": ["shape of paper was flat before and folded afterwards", "state of crease was unattached before and attached afterwards", "shape of paper was flat before and folded afterwards", "state of paper was folded before and stitched afterwards", "shape of paper was flat before and folded afterwards."]}
{"id": "Download a movie|1", "answers": ["location of search engine was absent before and present afterwards", "state of free movie site was unchosen before and chosen afterwards", "state of web browser was on site without film site before and on site with film site afterwards", "location of film site was at home before and on free site afterwards", "state of film site was unselected before and selected afterwards."]}
{"id": "Download a movie|2", "answers": ["state of search for a movie was unopened before and opened afterwards", "state of youtube website was considered before and searched afterwards", "state of starcraft was loading before and loaded afterwards", "step of free movie site was unseen before and seen afterwards", "state of starcraft was loading before and unloaded afterwards", "electric conductivity of computer was turned off before and turned on afterwards", "location of starcraft was on a page before and in a browser afterwards."]}
{"id": "Download a movie|3", "answers": ["step of download was still in progress before and finished afterwards", "state of tv was off before and on afterwards", "state of tv was on schedule before and deactivated afterwards", "state of tv was off screen before and in search box afterwards", "step of movie was unselected before and selected afterwards", "state of google for movie was unselected before and selected afterwards."]}
{"id": "Download a movie|4", "answers": ["state of film was unselected before and selected afterwards", "state of film was unselected before and selected afterwards", "step of movie quality was unselected before and selected afterwards", "state of browser was closed before and open afterwards", "state of tv was unselected before and selected afterwards", "location of url was in browser before and in a search box afterwards."]}
{"id": "Download a movie|5", "answers": ["step of download button was unclicked before and clicked afterwards", "state of browser was on a stop screen before and in a browser afterwards", "state of software program was on before and off afterwards", "step of download button was unclicked before and clicked afterwards", "state of browser was on a screen before and in a browser afterwards", "state of box was closed before and open afterwards."]}
{"id": "Endorse the check|1", "answers": ["knowledge of knowledge of the verification method was absent before and present afterwards", "state of the box was closed before and open afterwards", "state of hardware was inspected before and confirmed afterwards", "knowledge of person was ignorant of the verification method before and knowledgeable of the verification method afterwards."]}
{"id": "Endorse the check|2", "answers": ["knowledge of names was unknown before and known afterwards", "knowledge of board was unregulated before and verified afterwards", "verification of veracity of the check was incorrect before and verified afterwards", "organization of board was unselected before and selected afterwards", "knowledge of state education website was unverified before and verified afterwards", "verification of car was untested before and tested afterwards."]}
{"id": "Endorse the check|3", "answers": ["state of back was unmarked before and marked afterwards", "color of back of check was black before and gray afterwards", "knowledge of line was unidentified before and identified afterwards", "coverage of back of checked was uncovered before and covered by the endorsement afterwards", "state of back was unverified before and verified afterwards", "color of back of check was uncolored before and colored afterwards", "state of back was unchecked before and checked afterwards."]}
{"id": "Endorse the check|4", "answers": ["state of name was untyped before and typed on the back of the check afterwards", "step of name was unsigned before and signed afterwards", "color of line was blank before and marked with a line afterwards", "color of the back of the check was unmarked before and marked with a line afterwards."]}
{"id": "Endorse the check|5", "answers": ["step of credit card was unopened before and opened afterwards", "location of check was missing from bank before and located at bank afterwards", "location of name was on the form before and doneg on the form afterwards", "state of name was uncreated before and created afterwards", "location of check was at the bank before and with the person doing the check afterwards", "state of your name was absent before and signed on afterwards", "verification of credit card was unverified before and verified afterwards", "location of name was present before and absent afterwards."]}
{"id": "How to build a fire|1", "answers": ["step of firewood was unprocured before and procured afterwards", "state of wood was whole before and cut afterwards", "state of the wood was whole before and cut afterwards", "length of wood was longer before and shorter afterwards", "state of wood was whole before and cut afterwards", "weight of the log was heavier before and lighter afterwards", "state of wood was whole before and trimmed afterwards."]}
{"id": "How to build a fire|2", "answers": ["location of wood was stored before and out on the workshop afterwards", "location of firewood was at store before and at home afterwards", "availability of tinder was unavailable before and available afterwards"]}
{"id": "How to build a fire|3", "answers": ["temperature of planter was warm before and cool afterwards", "wetness of planter was dry before and wet afterwards", "dryness of area was dry before and wet with timber afterwards", "material of dry surface was unchosen before and chosen afterwards", "knowledge of material  was unchosen before and chosen afterwards."]}
{"id": "How to build a fire|4", "answers": ["organization of firewood was random before and measured/selected by you afterwards", "state of fire structure was considered before and built afterwards", "state of planter was whole before and cut afterwards", "step of cross fire structure was unbuilt before and built afterwards", "state of firewood was considered before and built afterwards", "state of planter was whole before and cut afterwards", "knowledge of firewood was undetermined before and selected afterwards"]}
{"id": "How to build a fire|5", "answers": ["temperature of site was cooler before and warmer afterwards", "light of light was dark before and lighter afterwards", "strength of fire resistance was low before and high afterwards", "state of lighter was unburned before and burned afterwards", "location of lighter was in store before and at home afterwards", "use of lighter was unused before and used in firewood burning cases afterwards", "temperature of lighter was room temperature before and hot afterwards", "state of fire was absent before and started afterwards", "temperature of lighter was cold before and hot afterwards", "temperature of lighter was cool before and hot afterwards."]}
{"id": "Bake a potato|1", "answers": ["location of potato was on the counter before and in the bowl afterwards", "location of potato was on the counter before and in the bowl afterwards", "state of the right type of potato was undecided before and chosen afterwards."]}
{"id": "Bake a potato|2", "answers": ["cleanness of bowl was clean before and dirty afterwards", "fullness of bowl was empty before and full afterwards", "location of water was in the pipes before and in the potatoes afterwards", "state of potatoes were unwashed before and washed afterwards", "location of potato was on counter before and in sink afterwards", "location of detergent was in bottle before and in potato afterwards", "location of detergent was in container before and in water afterwards", "cleanness of spoon was clean before and dirty afterwards", "state of wash was unplanned before and planned afterwards", "state of water was off before and on afterwards."]}
{"id": "Bake a potato|3", "answers": ["cleanness of potato was dirty before and clean afterwards", "location of olive oil was in a bottle before and on the potato afterwards", "moisture of potato's dry skin was dry before and wet afterwards", "location of pepper was in a package before and on the potato afterwards", "location of black pepper was in a container before and on the potato afterwards", "location of oil was in bottle before and on potato afterwards", "weight of bottle was heavy before and light afterwards"]}
{"id": "Bake a potato|4", "answers": ["cleanness of plate was clean before and dirty afterwards", "location of potato was on counter before and on plate afterwards", "temperature of potato was cold before and hot afterwards", "state of potato was dry before and oiled afterwards", "location of potato was on the counter before and on a plate afterwards", "location of plate was in cabinet before and on table afterwards", "weight of plate was lighter before and heavier afterwards", "cleanness of plate was clean before and dirty afterwards", "volume of plate was empty before and full afterwards", "weight of microwave was empty before and full afterwards", "volume of dish was empty before and full afterwards", "location of potato was on counter before and on plate afterwards", "weight of plate was lighter before and heavier afterwards."]}
{"id": "Bake a potato|5", "answers": ["electric conductivity of stove was off before and on afterwards", "temperature of plate was room temperature before and cool afterwards", "location of plate was in the cabinet before and on the table afterwards", "volume of microwave was empty before and full afterwards", "temperature of plate was room temperature before and cold afterwards", "volume of plate was empty before and full afterwards."]}
{"id": "Bake a potato|6", "answers": ["electric conductivity of microwave was turned off before and turned on afterwards", "temperature of potato was cold before and warm afterwards", "location of plate was in the dishwasher before and on the counter afterwards", "location of potato was in microwave before and on plate afterwards", "location of plate was outside of microwave before and inside microwave afterwards", "power of microwave was off before and on afterwards", "temperature of plate was room temperature before and hot afterwards", "state of microwave was empty before and contains potato afterwards", "electric conductivity of stovetop was off before and on afterwards."]}
{"id": "Bake a potato|7", "answers": ["cleanness of plate was clean before and dirty afterwards", "temperature of potato was cool before and warm afterwards", "state of potato was empty before and full afterwards", "location of potato was on counter before and on plate afterwards", "state of plate was empty before and full afterwards", "location of potato was on counter before and plate afterwards."]}
{"id": "Jump start a car|1", "answers": ["state of battery was stale before and found afterwards", "state of search was performed on car before and performed on new car afterwards", "distance of i was farther from car before and closer to car afterwards", "distance of car was farther from home before and closer to home afterwards", "distance of i was farther from car before and closer to car afterwards", "battery of battery was dormant before and activated afterwards", "location of new car was at home before and with good battery afterwards."]}
{"id": "Jump start a car|2", "answers": ["location of car was at start point before and near finished car afterwards", "brightness of car was dark before and lit afterwards", "electric conductivity of car was turned off before and turned on afterwards", "location of other car was idle before and parked afterwards", "state of searching was in progress before and complete afterwards", "location of car was at start point before and near finished car afterwards", "step of car was idle before and parked afterwards", "location of other car was empty before and parked afterwards."]}
{"id": "Jump start a car|3", "answers": ["state of car was noticed before and found afterwards", "power of car was off before and on afterwards", "pressure of body was relaxed before and tense afterwards", "state of hood was off before and on afterwards", "state of car was idle before and running afterwards", "temperature of hood was cold before and warm afterwards", "state of car was idling before and parked afterwards", "location of car was outside before and in the hood afterwards", "temperature of hood was cold before and warm afterwards."]}
{"id": "Jump start a car|4", "answers": ["knowledge of location was unknown before and known afterwards", "state of car was idling before and parked afterwards", "brightness of hood was dark before and lit afterwards", "pressure of driver was relaxed before and pushing afterwards", "knowledge of driver was uneducated before and educated afterwards", "location of car was without battery before and with battery afterwards", "power of car was off before and on afterwards", "location of battery was in charger before and in hood afterwards", "location of hood was empty before and being searched afterwards."]}
{"id": "Jump start a car|5", "answers": ["location of i was in car before and out of car afterwards", "connection of car was disconnected before and connected afterwards", "speed of car was motionless before and moving afterwards", "organization of cable was unattached before and attached afterwards"]}
{"id": "Jump start a car|6", "answers": ["power of car was off before and on afterwards", "state of the car was idle before and being used afterwards", "electric conductivity of car was turned off before and turned on afterwards", "electric conductivity of engine was off before and started afterwards", "state of car was off before and running afterwards", "electric conductivity of car engine was off before and on afterwards", "step of car was idle before and running afterwards", "electric conductivity of car was turned off before and turned on afterwards", "electric conductivity of gasoline was turned off before and turned on afterwards", "start of car was off before and started afterwards", "step of car was idle before and running afterwards."]}
{"id": "Jump start a car|7", "answers": ["state of car was showing signs before and ready for use afterwards", "knowledge of work car status was unknown before and known afterwards", "state of car was showing signs before and registered afterwards", "location of disabled vehicle was at work before and in the garage afterwards", "knowledge of work car was unlocated before and located afterwards", "electric conductivity of car was turned off before and turned on afterwards", "location of car was at work before and in the garage afterwards."]}
{"id": "Jump start a car|8", "answers": ["state of car was connected before and unconnected afterwards", "usage of jumpsuit was off before and on afterwards", "knowledge of ability to recognize car with mobility flaw was missing before and present afterwards", "state of hood was unlocated before and located afterwards", "state of car was starting before and finished afterwards."]}
{"id": "Jump start a car|9", "answers": ["state of engine was shut down before and running afterwards", "power of car was disconnected before and running afterwards", "location of disabled car was at home before and in the workspace afterwards", "state of car was on break before and running afterwards", "electric conductivity of car was turned off before and turned on afterwards", "state of cable was disconnected before and connected afterwards", "power of car was off before and on afterwards."]}
{"id": "Install a game on the Playstation|1", "answers": ["ocation of the Playstation was at the store before and at home afterwards", "location of the psp was at the store before and at home afterwards", "ownership of the psp was unpurchased before and purchased afterwards", "state of the game was for sale before and purchased afterwards", "location of money was in the wallet before and in the game register afterwards", "state of ring was inactive before and activated afterwards", "location of psp was missing from game before and at the game afterwards", "location of cd was on shelf before and on the table afterwards."]}
{"id": "Install a game on the Playstation|2", "answers": ["lectricity supply of the tv was without electricity before and connected to the tv afterwards", "state of the Playstation was unconnected before and connected afterwards", "state of tv was disconnected before and connected afterwards", "electric conductivity of the tv was turned off before and turned on afterwards", "state of psp was turned off before and turned on afterwards", "location of the Playstation was out of the box before and inside the box afterwards."]}
{"id": "Install a game on the Playstation|3", "answers": ["tate of box was unplugged before and plugged afterwards", "power of console was off before and on afterwards", "electric conductivity of plug was disconnected before and plugged in afterwards", "state of the Playstation was unplugged before and plugged in afterwards", "power of console was off before and on afterwards", "state of usb port was unplugged before and plugged in afterwards", "location of console was on the table before and in the box afterwards", "location of wire was missing from console before and in the console afterwards", "state of console was disconnected before and connected afterwards."]}
{"id": "Install a game on the Playstation|4", "answers": ["tate of button was loose before and compressed afterwards", "pressure of the power button was unpushed before and pushed afterwards", "power of power button was unpushed before and pushed afterwards."]}
{"id": "Install a game on the Playstation|5", "answers": ["ppearance of profile was missing before and created afterwards", "existence of user was anonymous before and created afterwards."]}
{"id": "Install a game on the Playstation|6", "answers": ["tate of system software was uninstalled before and installed afterwards", "state of game software was uninstalled before and installed afterwards", "state of internet connection was missing before and present afterwards", "state of game was uninstalled before and installed afterwards"]}
{"id": "Install a game on the Playstation|7", "answers": ["ate of the game was uninstalled before and installed afterwards", "state of software program was uninstalled before and installed afterwards", "state of game was uninstalled before and installed afterwards", "step of game was uninstalled before and installed afterwards."]}
{"id": "Install a game on the Playstation|8", "answers": ["ate of game was unselected before and selected afterwards", "step of the game was unselected before and selected afterwards."]}
{"id": "Make a purchase on Amazon|1", "answers": ["state of brower was closed before and open afterwards", "state of your web brower was closed before and open afterwards", "state of web browser was blank before and brower afterwards", "location of brower was on the internet before and off the internet afterwards", "power of browser was off before and on afterwards", "state of web brower was off before and on afterwards."]}
{"id": "Make a purchase on Amazon|2", "answers": ["state of www was absent before and entered afterwards", "state of www was absent before and present afterwards", "step of wwwwww was unclicked before and clicked afterwards", "state of browser was on address bar before and on web address bar afterwards."]}
{"id": "Make a purchase on Amazon|3", "answers": ["location of the item was outside of the Amazon search bar before and inside the Amazon search bar afterwards", "state of search for \"amazon\" was unentered before and entered afterwards", "state of web brower was unused before and being used afterwards", "state of bar was empty before and filled out afterwards", "step of item was unclicked before and clicked afterwards", "state of the item was unselected before and selected afterwards", "location of item was outside of the search bar before and inside the search bar afterwards."]}
{"id": "Make a purchase on Amazon|4", "answers": ["step of single item search was unclicked before and clicked afterwards."]}
{"id": "Make a purchase on Amazon|5", "answers": ["volume of cart was full before and empty afterwards", "state of item was unselected before and selected afterwards", "step of quantity was unselected before and selected afterwards", "step of product was unselected before and selected afterwards."]}
{"id": "Make a purchase on Amazon|6", "answers": ["location of product information was unselected before and selected afterwards", "step of add to cart was unclicked before and clicked afterwards", "state of item was unselected before and selected afterwards."]}
{"id": "Make a purchase on Amazon|7", "answers": ["location of cart was on my device before and on the shopping cart afterwards", "location of item was outside the basket of the cart before and in the cart afterwards", "state of item was unselected before and selected afterwards", "state of cart was empty before and full afterwards."]}
{"id": "Make a purchase on Amazon|8", "answers": ["step of checkout was unclicked before and clicked afterwards", "state of cart was unclicked before and clicked afterwards", "state of item order was unclicked before and clicked afterwards", "step of cart was at the store before and at home afterwards", "state of brower was on before and done afterwards."]}
{"id": "Make a purchase on Amazon|9", "answers": ["state of package was delivered to store before and on store to be delivered afterwards", "step of customers was untouched before and being processed afterwards", "state of address bar was empty before and completed afterwards", "step of shipping address was unclicked before and clicked afterwards."]}
{"id": "Make a purchase on Amazon|10", "answers": ["step of the money was in a wallet before and in the cashier's drawer afterwards", "state of credit card information was unconfirmed before and confirmed afterwards", "state of shipping information was unclicked before and clicked afterwards", "state of address bar was empty before and completed afterwards", "step of payment was unclicked before and clicked afterwards."]}
{"id": "Make a purchase on Amazon|11", "answers": ["state of code was unclicked before and clicked afterwards", "availability of code was non-transferrable before and redeemed for money afterwards", "step of code was unclicked before and clicked afterwards."]}
{"id": "Make a purchase on Amazon|12", "answers": ["state of product placement was unverified before and verified afterwards", "knowledge of user was uninformed before and informed afterwards."]}
{"id": "Make a purchase on Amazon|13", "answers": ["step of order was unplaced before and placed afterwards", "state of item was on shelves before and placed in store afterwards", "ownership of item was on shelves before and in store afterwards", "weight of shipping option was unclicked before and clicked afterwards", "step of order was being made before and finished afterwards."]}
{"id": "Turn on the radio in the car|1", "answers": ["state of key was in box before and removed afterwards", "state of car was locked before and unlocked afterwards", "step of car was unlocked before and unsearched afterwards", "state of key was unpurchased before and purchased afterwards", "state of car was unlocked before and locked afterwards."]}
{"id": "Turn on the radio in the car|2", "answers": ["state of door was closed before and open afterwards", "state of door was closed before and open afterwards", "location of key was inside the car before and outside the car afterwards", "location of car door was locked before and unlocked afterwards", "state of door was closed before and open afterwards", "position of key was on the table before and in hand afterwards", "sound of door was quiet before and making noise afterwards", "state of door was closed before and open afterwards."]}
{"id": "Turn on the radio in the car|3", "answers": ["temperature of i was cold before and warm afterwards", "orientation of driver was standing before and seated afterwards", "position of body was upright before and lying down afterwards", "orientation of i was standing up before and sitting in car afterwards", "location of seat was empty before and opened afterwards", "motion of wheel was still before and moving afterwards."]}
{"id": "Turn on the radio in the car|4", "answers": ["electric conductivity of ignition slot was empty before and full afterwards", "location of key was outside ignition slot before and inside ignition slot afterwards", "state of car door was closed before and open afterwards", "location of key was outside ignition slot before and inside ignition slot afterwards", "ignition of car was off before and on afterwards", "state of car door was closed before and open afterwards", "location of driver was outside before and inside afterwards."]}
{"id": "Turn on the radio in the car|5", "answers": ["pressure of finger was on ignition button before and left alone afterwards", "state of door was closed before and open afterwards", "orientation of key was horizontal before and vertical afterwards", "ignition of ignition was off before and on afterwards", "pressure of wheel was shaking before and relaxed afterwards", "state of car was off before and on afterwards", "pressure of car was pressurized before and pressurized afterwards", "state of button was unpressed before and pressed afterwards", "state of button was loose before and pressed afterwards", "state of button was unpressed before and pressed afterwards."]}
{"id": "Turn on the radio in the car|6", "answers": ["pressure of finger was stretching before and relaxing afterwards", "state of button was resting before and pressed afterwards", "position of key was horizontal before and vertical afterwards", "location of key was outside ignition slot before and inside ignition slot afterwards", "state of door was open before and closed afterwards", "state of button was unpressed before and pressed afterwards", "step of radio button was unpressed before and pressed afterwards."]}
{"id": "Turn on the radio in the car|7", "answers": ["state of channel was unselected before and selected afterwards", "step of the tuning channel was unprogrammed before and tuned afterwards", "electric conductivity of radio was turned off before and turned on afterwards", "step of desired channel was untuned before and tuned afterwards."]}
{"id": "apply for graduate school|1", "answers": ["cost of money for program was unavailable before and available afterwards", "knowledge of program was unknown before and known afterwards", "availability of program was unselected before and selected afterwards", "selection of a program was unselected before and selected afterwards."]}
{"id": "apply for graduate school|2", "answers": ["cost of fee for availability of a program was unknown before and known afterwards", "knowledge of program name was unknown before and known afterwards", "cost of money for education was unknown before and known afterwards", "availability of a program was unknown before and found afterwards", "availability of chair was absent before and present afterwards", "knowledge of cost was indeterminate before and determined afterwards."]}
{"id": "apply for graduate school|3", "answers": ["state of software was uninstalled before and installed afterwards", "state of software was uninstalled before and installed afterwards", "state of missed opportunity to take required test was present before and absent afterwards", "knowledge of types of tools needed was unknown before and known afterwards", "knowledge of possible testing tools was unknown before and known afterwards", "knowledge of tool utilization was unknown before and known afterwards."]}
{"id": "apply for graduate school|4", "answers": ["writing of statement was typed out before and pasted into a note afterwards", "state of statement was untaken before and taken afterwards", "state of the statement was unrecorded before and recorded afterwards", "step of personal statement was untaken before and taken afterwards", "length of written statement was longer before and shorter afterwards", "volume of hand was empty before and holding pen afterwards", "state of notebook was closed before and open afterwards", "state of statement was untaken before and taken afterwards"]}
{"id": "apply for graduate school|5", "answers": ["material of material was as follows before and omitted afterwards", "state of statement was untaken before and taken afterwards", "state of personal statement was untaken before and taken afterwards", "knowledge of material was as follows before and supplemented afterwards", "location of material was in memory before and out of memory afterwards", "state of screening was incomplete before and complete afterwards", "material of material was as follows before and omitted afterwards", "state of material was taken before and interpreted afterwards."]}
{"id": "apply for graduate school|6", "answers": ["state of application was absent before and completed afterwards", "state of statement was absent before and uploaded afterwards", "focus of attention was on other things before and on personal statement afterwards", "content of web page was empty before and filled with information afterwards", "state of web application was unentered before and entered afterwards."]}
{"id": "apply for graduate school|7", "answers": ["availability of proof of attendance was absent before and present afterwards", "length of time since high school was short before and hiked afterwards", "state of body was standing before and sitting afterwards"]}
{"id": "Using a dishwasher to clean dishes|1", "answers": ["wetness of tap water was dry before and wet afterwards", "state of tap water was empty before and full afterwards", "weight of dish was light before and heavier afterwards", "location of dish was on the counter before and in the dishwasher afterwards", "wetness of tap water was dry before and wet afterwards", "location of dish was outside of pot before and inside pot afterwards", "cleanness of tap water was clean before and dirty afterwards", "moisture of tap was dry before and wet afterwards", "volume of the pot was less full before and fuller afterwards", "location of dish soap was in the container before and in the dishwasher afterwards."]}
{"id": "Using a dishwasher to clean dishes|2", "answers": ["cleanness of dishwashers were dirty before and clean afterwards", "state of tap water was off before and on afterwards", "fullness of dishwashers were empty before and full afterwards", "moisture of tap water was dry before and wet afterwards", "location of dishes were on the counter before and in the dishwasher afterwards", "weight of the dishwasher was lighter before and heavier afterwards", "location of dishwashers were in the pantry before and in the sink afterwards", "location of dishwasher was outside the dishwasher before and inside the dishwasher afterwards."]}
{"id": "Using a dishwasher to clean dishes|3", "answers": ["location of detergent was in a bottle before and in the dishwasher afterwards", "cleanness of dishwasher was clean before and dirty afterwards", "location of soap was in a bottle before and in the dishwasher afterwards", "location of detergent was in bottle before and in water afterwards", "cleanness of dishwasher was clean before and dirty afterwards", "volume of the dishwasher was empty before and full afterwards."]}
{"id": "Using a dishwasher to clean dishes|4", "answers": ["temperature of the dishwashers were cool before and warm afterwards", "fullness of dishwasher was empty before and full afterwards", "location of detergent was in a container before and in the sink afterwards", "cleanness of dishwasher was clean before and dirty afterwards", "location of water was in pipes before and in dishwasher afterwards", "volume of the dishwasher was empty before and fuller afterwards", "location of tap water was in the tap before and in the dishwasher afterwards", "weight of the dishwasher was lighter before and heavier afterwards", "volume of the dishwasher was empty before and fuller afterwards", "wetness of detergent was dry before and wet afterwards", "weight of detergent container was heavier before and lighter afterwards", "fullness of dishwasher was empty before and full afterwards."]}
{"id": "Using a dishwasher to clean dishes|5", "answers": ["cleanness of the dishwashers were clean before and dirty afterwards", "location of dishwashers were in the pantry before and on the counter top afterwards", "volume of the dishwasher was fuller before and emptier afterwards", "location of water was in pipes before and in the drain afterwards", "cleanness of the dishwasher was dirty before and cleaner afterwards", "fullnesss of dishwasher was full before and empty afterwards", "volume of bowl was full before and empty afterwards", "location of water was in pipes before and in dishwasher afterwards."]}
{"id": "Refill the tank of a gas car|1", "answers": ["location of car was away before and at gas station afterwards", "location of location was outside the gas station before and inside the gas station afterwards."]}
{"id": "Refill the tank of a gas car|2", "answers": ["speed of gas was moving fast before and slowing afterwards", "orientation of person was straight before and turned afterwards", "direction of car was moving before and moving afterwards", "location of person was in the doorway before and behind the gas pump afterwards", "distance of car was far before and in front afterwards", "state of door was closed before and open afterwards."]}
{"id": "Refill the tank of a gas car|3", "answers": ["location of the credit card was in a pocket before and out of the pocket afterwards", "location of credit card was in wallet before and in gas station afterwards", "state of the gas station was without a credit card before and now has a credit card afterwards", "location of card was in wallet before and out of wallet afterwards", "location of card was outside of gas station before and inside gas station afterwards."]}
{"id": "Refill the tank of a gas car|4", "answers": ["pressure of the gas pump was off before and on afterwards", "location of credit card was in pocket before and on the table afterwards", "location of the gas was outside of the wallet before and inside the wallet afterwards", "location of gas station was unlocated before and located afterwards", "state of license plate was CR2640 before and displayed on gas pump afterwards", "state of gas pump was off before and on afterwards."]}
{"id": "Refill the tank of a gas car|5", "answers": ["state of fuel grade was unselected before and selected afterwards", "location of the gas station was away from you before and closer afterwards", "location of gas station foot was on gas before and off gas afterwards", "step of fuel grade was unselected before and selected afterwards", "state of credit card was unselected before and selected afterwards", "location of gas pump was away from station before and near station afterwards."]}
{"id": "Refill the tank of a gas car|6", "answers": ["state of gas pump was off before and on afterwards", "position of nozzle was attached to column before and pulled back afterwards", "location of fuel was in the bottle before and back out afterwards", "location of fuel was in bottle before and in gas pump afterwards", "state of nozzle was detached before and attached afterwards", "placement of back of column was bare before and pumping afterwards", "state of column was dry before and fueling afterwards."]}
{"id": "Buying snacks in a grocery store |1", "answers": ["location of location was random before and at the store afterwards", "location of location was at the store before and at home afterwards."]}
{"id": "Buying snacks in a grocery store |2", "answers": ["There will be no change."]}
{"id": "Buying snacks in a grocery store |3", "answers": ["location of bag was on the table before and in the basket afterwards", "weight of bag was heavy before and light afterwards", "fullness of basket was empty before and full afterwards", "location of chocolate was in the fridge before and in the bag afterwards", "location of peanut butter was in the fridge before and in the bag afterwards", "state of bag was empty before and full afterwards", "volume of bag was empty before and full afterwards"]}
{"id": "Buying snacks in a grocery store |4", "answers": ["location of money was in purse before and in register afterwards", "location of bag was at the store before and at the house afterwards", "ownership of popcorn was owned by the store before and owned by the shopper afterwards", "state of register was empty before and full afterwards."]}
{"id": "Buying snacks in a grocery store |5", "answers": ["location of money was in purse before and at register afterwards", "location of snack was at store before and at your home afterwards", "state of cashier was idle before and processing cash afterwards", "volume of cashier's hand was empty before and holding cash afterwards."]}
{"id": "Cook whole fish|1", "answers": ["cleanness of knife was clean before and dirty afterwards", "ownership of fish was unpurchased before and purchased afterwards", "location of fish was at store before and at home afterwards", "ownership of whole fish was unpurchased before and bought afterwards", "state of fish was whole before and purchased afterwards."]}
{"id": "Cook whole fish|2", "answers": ["cleanness of fish was dirty before and clean afterwards", "location of fish was in the fridge before and in the shop afterwards", "ownership of fish was owned by the store before and owned by the shopper afterwards", "weight of fish was light before and heavier afterwards", "composition of fish was whole before and filleted afterwards", "smell of fish was smelly before and smelling like fish afterwards", "cleanness of fish was dirty before and clean afterwards", "fullness of fish tank was less full before and more full afterwards", "smell of fish was unscented before and scented afterwards", "state of fish was whole before and filleted afterwards."]}
{"id": "Cook whole fish|3", "answers": ["cleanness of fish was dirty before and clean afterwards", "weight of fish was light before and heavier afterwards", "wetness of towel was dry before and wet afterwards", "moisture of fish was dry before and wet afterwards", "location of fish was on counter before and in towel afterwards", "weight of fish was light before and heavier afterwards", "wetness of towel was dry before and wet afterwards", "wetness of fish was dry before and wet afterwards", "fullness of towel was empty before and full afterwards", "cleanness of fish was dirty before and clean afterwards", "location of whole fish was at store before and at home afterwards."]}
{"id": "Cook whole fish|4", "answers": ["cleanness of fish was dirty before and clean afterwards", "wetness of towel was dry before and wet afterwards", "dryness of fish was dry before and oily afterwards", "weight of fish was light before and heavy afterwards", "location of fish was in the fridge before and on the drying rack afterwards", "fullness of drying rack was empty before and full afterwards", "location of fish was in packaging before and in a towel afterwards", "state of fish was raw before and cooked afterwards", "cleanness of fish was dirty before and clean afterwards", "temperature of fish was cool before and warm afterwards", "fullness of towel was empty before and full afterwards", "location of fish was at store before and at home afterwards", "location of fish was at the store before and in the drying rack afterwards."]}
{"id": "Cook whole fish|5", "answers": ["weight of oil bottle was heavier before and lighter afterwards", "cleanness of fish was dirty before and clean afterwards", "location of oil bottle was in the pantry before and on the table afterwards", "location of fish was in the fryer before and out and drained afterwards", "location of oil was in a bottle before and on the fish afterwards", "wetness of fish was dry before and oily afterwards", "location of fish was in a frying pan before and out and taken out afterwards", "cleanness of frying pan was dirty before and clean afterwards", "volume of frying pan was full before and empty afterwards", "fullness of bucket was more full before and less full afterwards", "cleanness of fish was dirty before and clean afterwards", "volume of bucket was full before and empty afterwards."]}
{"id": "Cook whole fish|6", "answers": ["weight of pan was heavy before and light afterwards", "location of oil was in the fish before and in a container afterwards", "taste of fish was plain before and flavored afterwards", "location of sauce was in package before and in pan afterwards", "location of fish was in boat before and out of boat afterwards", "weight of pan was lighter before and heavier afterwards", "texture of fish was dry before and oily afterwards", "location of oil was in bottle before and in pan afterwards", "volume of pan was empty before and full afterwards", "weight of sauce bottle was heavier before and lighter afterwards", "odor of fish was plain smelling before and fragrant afterwards", "state of fish was dry before and oily afterwards."]}
{"id": "Cook whole fish|7", "answers": ["cooked of fish was raw before and cooked afterwards", "temperature of pan was cold before and hot afterwards", "temperature of fish was cold before and warm afterwards", "texture of fish was hard before and soft afterwards", "cleanness of fish was dirty before and clean afterwards", "state of sauce was uncooked before and cooked afterwards", "temperature of fish was room temperature before and heated afterwards", "moisture of pan was dry before and wet afterwards", "composition of fish was separate before and mixed afterwards", "cooked of oil was raw before and cooked afterwards", "state of fish was raw before and cooked afterwards."]}
{"id": "Cook whole fish|8", "answers": ["location of fish was in pan before and on table afterwards", "state of fish was without sauce before and served afterwards."]}
{"id": "Watch a movie at theater|1", "answers": ["knowledge of you were unaware if a film was good before and now aware if a film is good afterwards", "state of search engine was closed before and opened afterwards", "state of film was unsaved before and saved afterwards", "state of computer was off before and on afterwards", "state of film was considered before and found afterwards."]}
{"id": "Watch a movie at theater|2", "answers": ["knowledge of film was unlocated before and located afterwards", "ownership of ticket was owned by the store before and bought by you afterwards", "state of search on google for \"bought ticket online\" was unopened before and opened afterwards", "state of ticket was unsold before and purchased afterwards", "knowledge of film was unlocated before and located afterwards", "location of movie was on shelf before and in your car afterwards", "money amount of ticket was insufficient before and sufficient afterwards", "state of store was open before and closed afterwards."]}
{"id": "Watch a movie at theater|3", "answers": ["location of person was at home before and on the road afterwards", "ownership of ticket was on line before and bought afterwards", "state of store was considered before and selected afterwards", "location of film was at home before and on a street afterwards", "money of ticket was unbought before and bought afterwards", "ownership of car was owned by the store before and owned by the shopper afterwards."]}
{"id": "Watch a movie at theater|4", "answers": ["location of starboard computer was missing before and present afterwards", "location of ticket was missing before and present afterwards", "state of appointment was unstarted before and in progress afterwards", "state of ticket agent was uncontacted before and contacted afterwards", "knowledge of ticket price was unknown before and known afterwards", "knowledge of starboard computer port was unclicked before and clicked afterwards", "knowledge of ticket buy was unverified before and verified afterwards", "state of screening was unsigned before and open afterwards", "location of movie was at the theater before and in the house afterwards", "location of starboard computer was absent before and present afterwards."]}
{"id": "Watch a movie at theater|5", "answers": ["knowledge of enjoyment was unknown before and known afterwards", "state of movie was unplayed before and purchased afterwards", "location of money was in purse before and at the theater afterwards", "state of screening was unplayed before and accepted afterwards", "ownership of ticket was owned by the store before and bought by you afterwards", "location of movie was on the table before and in front of the theater afterwards", "availability of screening site was unavailable before and available afterwards", "state of computer was off before and on afterwards."]}
{"id": "Charge cell phone|1", "answers": ["position of phone was empty before and occupied afterwards", "location of phone was off the table before and on the table afterwards"]}
{"id": "Charge cell phone|2", "answers": ["state of the phone charger was unplugged before and plugged in afterwards", "location of charger was at store before and in your house afterwards", "location of phone charger was at shop before and at home afterwards", "state of charger was unplugged before and plugged in afterwards", "orientation of finder was stationary before and running afterwards", "power of phone was off before and on afterwards."]}
{"id": "Charge cell phone|3", "answers": ["state of phone was unattached before and connected afterwards", "location of the phone charger was elsewhere before and connected to the charger afterwards", "location of charger was loose before and plugged in afterwards", "power of phone was off before and on afterwards", "state of the phone was off before and now on afterwards", "location of charger was unplugged before and plugged in afterwards", "state of the phone was unconnected to the charger before and connected to the charger afterwards."]}
{"id": "Charge cell phone|4", "answers": ["state of phone charger was charging before and disconnected afterwards", "state of phone charger was unconnected before and connected afterwards", "electric conductivity of phone was turned off before and turned on afterwards", "location of charger was unplugged into wall before and plugged in into wall afterwards", "location of charger was unconnected before and connected to phone afterwards", "organization of phone was unconnected before and connected afterwards", "state of unplugged phone charger was unconnected from the phone before and connected to the phone afterwards."]}
{"id": "Make an apple pie|1", "answers": ["cleanness of bowl was clean before and dirty afterwards", "location of salt was in the cannister before and in the bowl afterwards", "cleanness of whisk was clean before and dirty afterwards", "location of salt was in cannister before and in bowl afterwards", "location of flour was in bag before and in bowl afterwards", "cleanness of bowl was clean before and dirty afterwards"]}
{"id": "Make an apple pie|2", "answers": ["moisture of bowl was dry before and wet afterwards", "location of butter was in the fridge before and in the bowl afterwards", "cleanness of bowl was clean before and dirty afterwards", "location of butter was in fridge before and in bowl afterwards", "weight of bowl was lighter before and heavier afterwards", "texture of mixture was dry before and wetter afterwards", "state of butter was whole before and cut into cubes afterwards", "fullness of bowl was empty before and full afterwards", "form of butter was solid before and liquid afterwards", "texture of dough was dry before and moist afterwards", "location of mixing bowl was on counter before and in hand afterwards", "weight of bowl was light before and heavier afterwards."]}
{"id": "Make an apple pie|3", "answers": ["wetness of parchment was dry before and wet afterwards", "state of dough was flat before and rounded afterwards", "fullness of bowl was empty before and full afterwards", "location of parchment was on the table before and in the hand afterwards", "cleanness of rolling pin was clean before and dirty afterwards", "volume of bowl was empty before and fuller afterwards", "shape of dough was flat before and rounded afterwards", "state of dough was unrolled before and rolled afterwards", "size of dough was random before and rounded afterwards."]}
{"id": "Make an apple pie|4", "answers": ["location of brown sugar was in container before and on cookie sheet afterwards", "fullness of plastic bag was empty before and full of ingredients afterwards", "cleanness of rolling pin was clean before and dirty afterwards", "location of seasoning was in bowl before and on cookie sheet afterwards", "location of brown sugar was in the package before and in the bowl afterwards", "texture of cookie dough was smooth before and sticky afterwards", "texture of sugar was powdery before and wetter afterwards", "shape of mixture was flat before and rounded afterwards", "location of seasoning was in the container before and on the cookie sheet afterwards", "weight of plastic bag was lighter before and heavier afterwards", "cleanness of rolling pin was clean before and dirty afterwards", "shape of mixture was flat before and rounded afterwards."]}
{"id": "Make an apple pie|5", "answers": ["location of seasoning was in bowl before and on cookie sheet afterwards", "location of peel was on the counter before and on the cookie sheet afterwards", "wholeness of cookie was whole before and crunched up afterwards", "shape of cookie dough was whole before and in pieces afterwards", "cleanness of knife was clean before and dirty afterwards", "ownership of seasoning was available for purchased before and purchased afterwards", "location of peel was on the counter before and on the cookie sheet afterwards", "location of seasoning was in the bowl before and on the cookie sheet afterwards", "state of cookie dough was whole before and in pieces afterwards", "shape of cookie dough was round shaped before and peeled afterwards."]}
{"id": "Make an apple pie|6", "answers": ["location of apple was outside of bag before and inside of bag afterwards", "location of apple was on counter before and in bag afterwards", "location of the apple was outside of the bag before and inside the bag afterwards", "location of cinnamon was on plant before and inside bag afterwards", "orientation of bag was horizontal before and vertical afterwards", "size of orange was on the outside of the bag before and inside the bag afterwards", "state of chipboard was whole before and cut into chunks afterwards", "volume of bag was empty before and full afterwards", "texture of bag was smooth before and sticky afterwards", "texture of peel was whole before and cut afterwards", "shape of the apple was whole before and in half afterwards", "orientation of the apple was atop the bag before and outside of the bag afterwards", "weight of bag was light before and heavier afterwards."]}
{"id": "Make an apple pie|7", "answers": ["location of bag was in the cabinet before and on the table afterwards", "state of pie was unassembled before and assembled afterwards", "form of pie was unformed before and assembled afterwards", "location of orange peel was on the counter before and on the pie afterwards."]}
{"id": "Make an apple pie|8", "answers": ["temperature of pan was room temperature before and hot afterwards", "texture of filling was thinner before and thicker afterwards", "texture of pie was soft before and firmer afterwards", "composition of pie was raw before and cooked afterwards", "color of dough was white before and browned afterwards", "temperature of pie was cooler before and hotter afterwards", "texture of mixture was thinner before and thicker afterwards", "state of crust was whole before and cut afterwards", "state of dough was raw before and cooked afterwards", "temperature of oven was cold before and hot afterwards", "location of cookie sheet was on tray before and in oven afterwards", "location of pie was in box before and on counter afterwards."]}
{"id": "Make an apple pie|9", "answers": ["temperature of plate was cold before and hot afterwards", "location of pie was in the freezer before and in the pan afterwards", "temperature of plate was room temperature before and cool afterwards", "location of pie was in the oven before and on the counter afterwards", "temperature of pie was hot before and cooling afterwards", "electric conductivity of oven was on before and off afterwards", "time of the time was earlier before and later afterwards", "temperature of pie was hot before and cool afterwards", "location of lid was on the counter before and on the pie afterwards", "size of pie was large before and small afterwards."]}
{"id": "Make an apple pie|10", "answers": ["shape of pie was whole before and cut into slices afterwards", "location of pie was on table before and in pan afterwards", "location of graham cracker was on counter before and on plate afterwards", "composition of pie was in half before and eaten afterwards", "cleanness of cutting board was clean before and dirty afterwards", "location of pie was on the counter before and in the eater's hand afterwards", "taste of pie was unseasoned before and seasoned afterwards", "location of graham cracker was in refrigerator before and on table afterwards", "texture of pie was soft before and crispy afterwards", "moisture of knife was dry before and wet afterwards", "location of cream was in a container before and on the pie afterwards", "texture of pie was firm before and soft afterwards."]}
{"id": "Repotting a house plant|1", "answers": ["possession of pot was for sale before and purchased afterwards", "location of new pot was at store before and at home afterwards", "location of old pot was at store before and at home afterwards."]}
{"id": "Repotting a house plant|2", "answers": ["state of pot was wet before and dry afterwards", "state of new pot was uncovered before and covered afterwards", "state of towel was flat before and rolled afterwards", "state of pot was dirty before and cleaned afterwards", "location of towel was on counter before and in hand afterwards", "location of towel was on table before and in pot afterwards."]}
{"id": "Repotting a house plant|3", "answers": ["state of pot was containing the plant before and separated afterwards", "location of plant was on counter before and in pot afterwards", "location of pot was in cabinet before and removed from cabinet afterwards."]}
{"id": "Repotting a house plant|4", "answers": ["cleanness of pot was dirtier before and cleaner afterwards", "location of dirt was outside of pot before and inside pot afterwards", "location of dirt was in old pot before and in new pot afterwards."]}
{"id": "Repotting a house plant|5", "answers": ["temperature of pot was cool before and hot afterwards", "temperature of pot was cold before and hot afterwards", "location of pot was indoors before and in out of pot afterwards."]}
{"id": "Repotting a house plant|6", "answers": ["wetness of soil was drier before and wetter afterwards", "thickness of soil was thinner before and thicker afterwards", "moisture of plant was dry before and wet afterwards", "location of water was in the pipes before and in the plants pots afterwards", "state of the pot was dry before and wet afterwards", "wetness of pot was dry before and watered afterwards."]}
{"id": "Repotting a house plant|7", "answers": ["odor of the pot was smell free before and stinky afterwards", "cleanness of area around the plant was dirtier before and cleaner afterwards", "location of dirt was on plants before and removed afterwards."]}
{"id": "Building a shelf|1", "answers": ["There will be no change."]}
{"id": "Building a shelf|2", "answers": ["weight of wall was light before and heavier afterwards", "size of wood was unmeasured before and measured afterwards", "weight of scale was heavy before and light afterwards"]}
{"id": "Building a shelf|3", "answers": ["length of wood was measured before and cut into the appropriate length afterwards", "size of wood was whole before and cut into appropriate length afterwards", "composition of lumber was uncut before and cut afterwards", "state of wood was whole before and cut afterwards", "length of timber was uncut before and cut to desired length afterwards."]}
{"id": "Building a shelf|4", "answers": ["weight of board was heavier before and lighter afterwards", "state of wood was unshaven before and sanded afterwards", "color of wood was colorful before and dingy black afterwards", "moisture of stain was wet before and dry afterwards", "step of wood was smooth before and soggy afterwards", "texture of wood was rough before and smooth afterwards", "temperature of wood was cool before and warm afterwards", "texture of wood was uneven before and even afterwards", "location of grit was on wood before and off wood afterwards", "color of wood was light before and dark afterwards", "cleanness of sandpaper was clean before and dirty afterwards", "temperature of wood was room temperature before and cool afterwards", "cleanness of firewood was dirty before and clean afterwards", "texture of paint was smooth before and tacky afterwards", "cleanness of sandpaper was clean before and dirty afterwards", "cleanness of wood was dirty before and clean afterwards."]}
{"id": "Building a shelf|5", "answers": ["orientation of installation was horizontal before and vertical afterwards", "state of installation was incomplete before and complete afterwards", "location of installation hardware was in store before and in your home afterwards", "state of installation was incomplete before and complete afterwards", "electric conductivity of computer was turned off before and turned on afterwards", "availability of electric conductivity of lumber was absent before and present afterwards."]}
{"id": "Building a shelf|6", "answers": ["location of wood shelf was off of rig before and on rig afterwards", "availability of hardware store was unable to locate wood shelf before and able to locate wood shelf afterwards", "location of shelf was uninstalled on the rig before and installed on the rig afterwards", "placement of the wood shelf was loose before and now installed on the rig afterwards", "strength of the wood shelf was loose before and tight afterwards", "state of installation was unassembled before and installed afterwards"]}
{"id": "Building a shelf|7", "answers": ["location of furniture was loose before and on the shelf afterwards", "location of furniture was on the table before and added to the shelf afterwards", "weight of shelf was lighter before and heavier afterwards"]}
{"id": "Washing dishes|1", "answers": ["fullness of sink was emptier before and fuller afterwards", "temperature of the sink was cooler before and warmer afterwards", "temperature of water was warm before and cool afterwards", "fullness of sink was empty before and full afterwards", "cleanness of the sink was needing cleaning before and ready to be cleaned afterwards."]}
{"id": "Washing dishes|2", "answers": ["moisture of sponge was dry before and wet afterwards", "texture of the sponge was dry before and wet afterwards", "location of soap was in bottle before and on sponge afterwards", "cleanness of sponge was clean before and dirty afterwards", "volume of the bowl was fuller before and less full afterwards", "wetness of the sponge was dry before and wet afterwards", "state of sponge was dry before and wet afterwards", "location of dish soap was outside of bowl before and inside bowl afterwards", "weight of the bowl was lighter before and heavier afterwards", "wetness of sponge was dry before and wet afterwards."]}
{"id": "Washing dishes|3", "answers": ["odor of dish soap was smell free before and strong smelling afterwards", "location of dish soap was on sponge before and on sponge afterwards"]}
{"id": "Washing dishes|4", "answers": ["cleanness of drying rack was bare before and covered with dish soap afterwards", "cleanness of drying rack was clean before and dirty afterwards", "location of dish soap was in bowl before and in drying rack afterwards"]}
{"id": "Washing dishes|5", "answers": ["location of dish soap was in bowl before and in drying rack afterwards", "location of dish soap was in bowl before and in drying rack afterwards."]}
{"id": "Washing dishes|6", "answers": ["state of dish soap was wet before and dry afterwards", "location of dish soap was in bowl before and in drying rack afterwards", "location of dish soap was in the bowl before and in the drying rack afterwards."]}
{"id": "Make a bed|1", "answers": ["covering of mattress was bare before and covered afterwards", "fullness of striping area was less full before and more full afterwards"]}
{"id": "Make a bed|2", "answers": ["weight of mattress was heavier before and lighter afterwards"]}
{"id": "Make a bed|3", "answers": ["cleanness of sheet was covered in sheets before and cleaned out afterwards", "fullness of bed was empty before and full afterwards", "weight of sheet was lighter before and heavier afterwards", "cleanness of first was dirty before and clean afterwards", "area of sheet was covered in sheets before and striped afterwards."]}
{"id": "Make a bed|4", "answers": ["orientation of flat sheet tuck was away from mattress before and under foot of mattress afterwards", "placement of the mattress was being tucked under the foot before and being put on first afterwards", "orientation of sheet was flat before and pinned afterwards", "state of foot was bare before and covered afterwards", "weight of the mattress was lighter before and heavier afterwards."]}
{"id": "Make a bed|5", "answers": ["orientation of comforter was loose before and attached to mattress afterwards", "covering of mattress was bare before and covered with comforter afterwards", "location of comforter was on table before and under mattress afterwards", "location of comforter was in hand before and under mattress afterwards", "location of comforter was on bed before and on mattress afterwards", "orientation of mattress was open before and closed afterwards."]}
{"id": "Make a bed|6", "answers": ["bareness of mattress was bare before and covered afterwards", "fullness of head of mattress was more full before and less full afterwards", "location of comforter was on table before and under head of mattress afterwards", "cover of head of the mattress was bare before and covered afterwards", "location of pillowcase was on the bed before and on the head of the mattress afterwards", "location of pillow was away from mattress before and under mattress afterwards."]}
{"id": "Make a bed|7", "answers": ["weight of mattress was lighter before and heavier afterwards", "fullness of bed was less full before and more full afterwards", "covering of mattress was bare before and covered afterwards"]}
{"id": "Create a gmail account|1", "answers": ["state of chrome browser was closed before and open afterwards", "state of search for google chrome was missing before and completed afterwards", "location of chrome browser was on the internet before and in a browser afterwards", "state of search for chrome was unopened before and opened afterwards", "state of search for chocolate was unopened before and opened afterwards."]}
{"id": "Create a gmail account|2", "answers": ["location of chrome browser was on the left before and on the right hand of the browser window afterwards", "state of browser was on Gmail before and on chrome afterwards", "state of chrome browser was unloaded before and opened afterwards", "step of Gmail shortcut was unclicked before and clicked afterwards", "state of window was empty before and filled with a link afterwards."]}
{"id": "Create a gmail account|3", "answers": ["state of account was unselected before and selected afterwards", "state of account button was unclicked before and clicked afterwards", "step of \"create an account\" was unclicked before and clicked afterwards", "state of google chrome browser was on account creation page before and on account creation page afterwards."]}
{"id": "Create a gmail account|4", "answers": ["state of account was unentered before and entered afterwards", "step of next step was unclicked before and clicked afterwards", "state of account was unclicked before and clicked afterwards", "step of next step was unclicked before and clicked afterwards", "state of password was unentered before and entered afterwards", "step of next item was unclicked before and clicked afterwards."]}
{"id": "Create a gmail account|5", "answers": ["state of account was unselected before and selected afterwards", "state of background was customized before and customized afterwards", "step of background was unselected before and selected afterwards", "complexity of email was unselected before and selected afterwards."]}
{"id": "Create a gmail account|6", "answers": ["state of email was being exchanged before and being delivered afterwards", "step of email was unopened on the contacts page before and being delivered to the contacts page afterwards"]}
{"id": "Wax a car|1", "answers": ["cleanness of the car was dirty before and cleaner afterwards", "location of grime was on the floor before and in the cleaner afterwards", "state of car was dirty before and clean afterwards", "moisture of grime was wet before and dry afterwards", "cleanness of car was dirty before and clean afterwards", "state of the grime was on the car before and being cleaned afterwards", "location of grime was in the spray bottle before and on the car afterwards."]}
{"id": "Wax a car|2", "answers": ["temperature of car was cool before and warm afterwards", "location of car was out of sun before and in sun afterwards", "wetness of car was dry before and wet afterwards", "location of grass was untouched before and in sun afterwards", "location of brake pedal was in use before and removed afterwards", "location of gas pedal was depressed before and elevated afterwards", "location of grass was on the ground before and in the shade afterwards", "electric conductivity of car was turned off before and turned on afterwards."]}
{"id": "Wax a car|3", "answers": ["location of wax was in shop before and at home afterwards", "location of wax was in shop before and at home afterwards", "location of pad was in store before and at home afterwards", "cleanness of wax was dirty before and clean afterwards", "texture of car was dirty before and smooth afterwards", "location of wax was in shop before and at home afterwards", "location of wax was at store before and at home afterwards."]}
{"id": "Wax a car|4", "answers": ["location of wax was in wax before and on the car afterwards", "texture of car was sticky before and smooth afterwards", "location of wax was in tin before and on car afterwards", "state of pad was was unwooed before and wooed afterwards", "state of wax was dry before and wet afterwards", "texture of seat was uncomfortable before and comfortable afterwards", "location of wax was in tin before and on car afterwards", "wetness of wax was dry before and damp afterwards", "location of wax was in tin before and on car afterwards."]}
{"id": "Wax a car|5", "answers": ["composition of wax was wet before and dried afterwards", "state of car paint was vulnerable before and protected afterwards", "location of wax was in tin before and on car afterwards", "wetness of wax was wet before and dry afterwards", "wetness of paint was wet before and dry afterwards", "state of the wax was wet before and dried afterwards", "location of wax was in tin before and on car afterwards."]}
{"id": "Wax a car|6", "answers": ["wetness of car was damp before and dry afterwards", "location of car was in sun before and in vacuum afterwards", "wetness of wax was wet before and dry afterwards", "state of paint was vulnerable before and protected afterwards", "location of wax was on wax before and on car afterwards", "viscosity of wax was thick before and thin afterwards", "weight of wax was full before and empty afterwards."]}
{"id": "Wax a car|7", "answers": ["cleanness of cloth was clean before and dirty afterwards", "location of wax was on car before and on cloth afterwards", "state of the wax was unwiped before and wiped away afterwards", "location of wax was on the car before and on the cloth afterwards", "waxiness of the cloth was waxy before and smooth afterwards", "waxiness of wax was sticky before and dry afterwards."]}
{"id": "Wax a car|8", "answers": ["There will be no change."]}
{"id": "Stay at Airbnb|1", "answers": ["search status of airbnb was unlocated before and located afterwards", "status of suitable airbnb was unlocated before and located afterwards", "state of search was entered before and performed afterwards", "availability of airbnb was unavailable before and available afterwards", "state of device was closed before and open afterwards", "knowledge of location of suitable airbnb was unknown before and known afterwards", "state of google for tv was unavailable before and available afterwards", "status of google for tv was uninstalled before and installed afterwards", "electric conductivity of tv was turned off before and turned on afterwards", "electric conductivity of stove was turned off before and turned on afterwards."]}
{"id": "Stay at Airbnb|2", "answers": ["location of reservation was in an account before and accessed through the website afterwards", "step of book was unsold before and sold afterwards", "location of book was at home before and on airbnb afterwards", "state of book was unowned before and bought afterwards", "location of address was original home before and different from airbnb afterwards."]}
{"id": "Stay at Airbnb|3", "answers": ["location of place was unarranged before and arranged afterwards", "cost of airbnb was unpurchased before and purchased afterwards", "availability of airbnb was uncontacted before and called afterwards", "state of date was unstarted before and started afterwards", "location of person was home before and at the airport afterwards", "step of appointment was unmade before and made afterwards", "location of person was in house before and outside afterwards", "location of schedule was unmade before and made afterwards."]}
{"id": "Stay at Airbnb|4", "answers": ["state of green light was green before and red afterwards", "availability of host was unnotified of appointment before and notified of appointment afterwards", "state of thermostat was unchecked before and checked afterwards", "knowledge of thermostat was unchecked before and checked afterwards", "electric conductivity of thermostat was turned off before and turned on afterwards", "state of wrist was relaxed before and pressed afterwards", "state of error was displayed before and omitting afterwards."]}
{"id": "Stay at Airbnb|5", "answers": ["location of bag was in the guest's hand before and out of the guest's hand afterwards", "state of door was locked before and unlocked afterwards", "orientation of door was open before and closed afterwards", "state of envelope was opened before and closed afterwards", "state of thermos was turned off before and turned on afterwards", "orientation of bag was unpackaged before and packed afterwards", "weight of bag was lighter before and heavier afterwards."]}
{"id": "Stay at Airbnb|6", "answers": ["location of bag was off the host before and on the host afterwards", "state of enjoyment was absent before and present afterwards", "state of host was idling before and enjoying meal afterwards", "state of food was uneaten before and eaten afterwards", "state of host was hungry before and satiated afterwards", "state of bed was empty before and occupied afterwards."]}
{"id": "Stay at Airbnb|7", "answers": ["state of tv was off before and on afterwards", "orientation of face was facing down before and facing forward afterwards", "state of wrist was bare before and covered afterwards", "container of fridge was full before and empty afterwards", "consumption of food was unconsumed before and consumed afterwards."]}
{"id": "Use an oil diffuser|1", "answers": ["state of lid was closed before and open afterwards", "state of diffuser lid was closed before and open afterwards", "openness of lid was closed before and open afterwards", "position of hood was closed before and open afterwards", "state of oil diffuser lid was closed before and opened afterwards", "state of lid was closed before and opened afterwards."]}
{"id": "Use an oil diffuser|2", "answers": ["state of the oil diffuser lid was unselected before and selected afterwards", "location of oil was in the bottle before and on the windshield afterwards", "state of diffuser lid was unattached before and attached afterwards", "location of the oil diffuser lid was elsewhere before and on the roof of the house afterwards", "knowledge of knowledge od which oil diffuser lid is needed was absent before and present afterwards."]}
{"id": "Use an oil diffuser|3", "answers": ["location of oil was in bottle before and in diffuser afterwards", "location of the oil was in the bottle before and in the diffuser afterwards", "location of oil was in bottle before and in diffuser afterwards", "location of oil was in bottle before and in diffuser afterwards", "state of diffuser was empty before and full afterwards", "location of the oil was in the bottle before and in the diffuser afterwards", "weight of the diffuser was lighter before and heavier afterwards."]}
{"id": "Use an oil diffuser|4", "answers": ["volume of container was empty before and full afterwards", "volume of container was empty before and full afterwards", "weight of oil diffuser was light before and heavy afterwards", "location of oil was in the bottle before and in the diffuser afterwards", "location of water was outside of container before and inside of container afterwards", "location of bucket was outside of diffuser before and inside diffuser afterwards", "weight of oil diffuser was lighter before and heavier afterwards", "location of water was in the faucet before and in the container afterwards", "wetness of container was dry before and wet afterwards", "state of diffuser lid was off before and on afterwards."]}
{"id": "Use an oil diffuser|5", "answers": ["openness of lid was closed before and open afterwards", "state of oil was liquid before and gas afterwards", "composition of lid was leaky before and sealed afterwards", "volume of the diffuser lid was emptier before and fuller afterwards", "location of water was in the pipes before and in the air afterwards", "openness of diffuser lid was open before and closed afterwards."]}
{"id": "Use an oil diffuser|6", "answers": ["visibility of diffuser was invisible before and visible afterwards", "state of diffuser was off before and on afterwards", "state of diffuser was unlocated before and located afterwards", "orientation of airflow was limited before and increased afterwards", "state of the diffuser lid was loose before and tight afterwards", "orientation of lid was horizontal before and vertical afterwards", "orientation of oil was horizontal before and vertical afterwards", "airflow of diffuser was static before and manual afterwards."]}
{"id": "Use an oil diffuser|7", "answers": ["electric conductivity of diffuser was turned off before and turned on afterwards", "speed of oil was still before and running afterwards", "appearance of diffuser was bare before and ready to use afterwards."]}
{"id": "Take a shower|1", "answers": ["temperature of pool was warm before and cool afterwards", "sound of water was quiet before and roaring afterwards", "power of faucet was off before and on afterwards", "temperature of water was room temp before and cool afterwards", "electric conductivity of stove was off before and on afterwards."]}
{"id": "Take a shower|2", "answers": ["state of plunging was undone before and undressed afterwards", "dress of plunging was unshaven before and trimmed afterwards", "location of plunging shoes was off before and on feet afterwards", "texture of dress was loose before and tight afterwards."]}
{"id": "Take a shower|3", "answers": ["temperature of body was warm before and cooler afterwards", "temperature of person was hot before and cooler afterwards", "state of water was warm before and cool afterwards", "temperature of temperature was untested before and tested afterwards", "temperature of temperature was unadjusted before and adjusted afterwards", "temperature of temperature was untested before and tested afterwards."]}
{"id": "Take a shower|4", "answers": ["temperature of body was warm before and cool afterwards", "location of person was inside before and outside afterwards", "state of door was closed before and open afterwards", "temperature of water was cold before and warm afterwards", "temperature of person was hot before and cool afterwards", "orientation of head was upright before and tilted afterwards"]}
{"id": "Take a shower|5", "answers": ["location of soap was in bottle before and on hands afterwards", "location of soap was in bathroom before and in arms afterwards"]}
{"id": "Take a shower|6", "answers": ["location of soap was in bottle before and in hair afterwards", "location of conditioner was in bottle before and on hair afterwards", "moisture content of hair conditioner was dry before and damp afterwards", "location of conditioner was in the bottle before and on the head afterwards", "texture of hair was silky before and smooth afterwards", "state of conditioner was liquid before and soap afterwards", "location of conditioner was in the bottle before and on the hair afterwards", "location of water was in the faucet before and in the sink afterwards."]}
{"id": "Take a shower|7", "answers": ["location of head was in the chair before and down a drain afterwards", "state of face was flushed before and rinsed afterwards", "location of face was in chair before and down drain afterwards", "state of hair was bleachy before and conditioned afterwards", "location of cap was on the hair before and off the hair afterwards."]}
{"id": "Take a shower|8", "answers": ["location of head was up before and down afterwards", "temperature of head was warm before and cool afterwards", "orientation of door was open before and closed afterwards."]}
{"id": "Take a shower|9", "answers": ["state of elevator was locked before and unlocked afterwards", "location of person was inside before and outside afterwards"]}
{"id": "Hit a tennis ball with a tennis racquet|1", "answers": ["location of ball was in air before and in air afterwards", "velocity of ball was at apex before and decelerating afterwards", "distance of distance from pole was large before and small afterwards", "location of ball was in your hand before and in the air afterwards", "speed of person was still before and throwing afterwards", "power of arm was relaxed before and throwing afterwards", "location of ball was at the person's hand before and in the air afterwards", "distance of the ball was far before and close afterwards."]}
{"id": "Hit a tennis ball with a tennis racquet|2", "answers": ["distance of the ball was in your hand before and now in the air afterwards", "speed of the ball was still before and now in motion afterwards", "location of the ball was in the hands before and now in the air afterwards", "distance of the ball was close to you before and now let go of you afterwards", "weight of the ball was heavier before and now lighter afterwards", "shape of the ball was still before and now bouncing afterwards."]}
{"id": "Hit a tennis ball with a tennis racquet|3", "answers": ["orientation of body was to the side before and at the top of the ball afterwards", "speed of ball was consistent before and bouncing afterwards", "location of the ball was to the side before and at the top of the ball afterwards."]}
{"id": "Hit a tennis ball with a tennis racquet|4", "answers": ["location of ball was on ground before and in air afterwards", "distance of ball was close to body before and far from body afterwards", "speed of ball was slow before and fast afterwards."]}
{"id": "Hit a tennis ball with a tennis racquet|5", "answers": ["length of arm was swinging back before and swinging back afterwards", "movement of ball was stationary before and moving afterwards", "shape of arm was back before and now swinging back afterwards", "state of ball was still before and moving afterwards", "location of ball was at hips before and at knees afterwards", "speed of ball was still before and in motion afterwards."]}
{"id": "Hit a tennis ball with a tennis racquet|6", "answers": ["location of the racquet was away from your shoulder before and now behind your shoulder afterwards", "state of shoulder was dry before and wet afterwards", "location of the ball was still before and now spinning afterwards", "state of the racquet was separated before and joined afterwards", "position of the raquet was down before and up afterwards"]}
{"id": "Throw a frisbee|1", "answers": ["altitude of your foot was above the ground before and touching the ground afterwards", "location of frisbee was on ground before and picked up afterwards", "orientation of person was standing before and standing afterwards", "state of the frisbee was unselected before and picked up afterwards", "state of person was sitting before and standing afterwards."]}
{"id": "Throw a frisbee|2", "answers": ["position of frisbee was on ground before and held by person afterwards", "orientation of person was standing near frisbee before and holding the frisbee afterwards", "state of person was holding the frisbee before and holding the frisbee afterwards", "orientation of person was vertical before and horizontal afterwards", "orientation of person was standing before and crouched afterwards."]}
{"id": "Throw a frisbee|3", "answers": ["location of frisbee was flying away before and towards chest afterwards", "location of the frisbee was in the air before and now away from the chest afterwards", "orientation of frisbee was aimed low before and aimed high afterwards", "state of air was empty before and filled with frisbee afterwards."]}
{"id": "Throw a frisbee|4", "answers": ["length of arm was extended before and flexed afterwards", "arm length of arm was long before and shorter afterwards", "location of frisbee was in air before and on ground afterwards", "state of arm was loose before and stretched afterwards", "location of frisbee was in air before and on ground afterwards."]}
{"id": "Throw a frisbee|5", "answers": ["location of frisbee was stuck in air before and free afterwards", "location of frisbee was stuck in air before and released afterwards", "state of frisbee was held before and released afterwards."]}
{"id": "Throw a frisbee|6", "answers": ["position of arm was back before and bent afterwards", "speed of person was still before and moving afterwards", "location of frisbee was flying through the air before and back to your body afterwards", "state of arm was locked before and released afterwards", "stability of momentum was maintained before and lost afterwards"]}
{"id": "Snowboarding down a skii slope|1", "answers": ["location of skii was in air before and in room afterwards", "orientation of person was standing before and sitting afterwards", "location of body was upright before and leaning forward afterwards"]}
{"id": "Snowboarding down a skii slope|2", "answers": ["strength of strap was flimsy before and strong afterwards", "state of strap was unattached before and attached afterwards", "safety of body was unprotected before and protected afterwards", "strength of snowboard was insecure before and secure afterwards", "orientation of position was bare before and secured afterwards", "location of snowboard was in the closet before and on the hands afterwards", "state of strap was tight before and loose afterwards", "location of snowboard was in the closet before and on the hands afterwards."]}
{"id": "Snowboarding down a skii slope|3", "answers": ["movement of body was straight before and turned afterwards", "position of person was upright before and leaning down afterwards", "location of snowboard was on the side of the road before and on the side of the road afterwards", "location of snowboard was on ground before and on slope afterwards."]}
{"id": "Snowboarding down a skii slope|4", "answers": ["direction of ski slope was slope before and steep slope afterwards", "direction of ski slope direction was northwest before and northwest afterwards", "position of body was upright before and leaning down afterwards"]}
{"id": "Snowboarding down a skii slope|5", "answers": ["location of skiier was on ground before and on snowboard afterwards", "movement of body was upright before and sliding down slope afterwards", "orientation of rider was vertical before and horizontal afterwards", "orientation of rider was in the snow before and on the ground afterwards", "location of snowboarding was on the ground before and on the person's legs afterwards", "position of rider was on ground before and on snowboard afterwards", "position of skiier was on the ground before and on the snowboard afterwards."]}
{"id": "Snowboarding down a skii slope|6", "answers": ["motion of snowboard was stationary before and moving afterwards", "orientation of stance was static before and forward afterwards", "location of skateboard was in the garage before and on the ground afterwards", "location of snowboarding was in the garage before and on the ground in front of the skier afterwards"]}
{"id": "Shoot an arrow|1", "answers": ["position of arm was up before and down afterwards", "location of the bow was up before and is in the hand afterwards", "state of the bow was held without dominant hand before and held with dominant hand afterwards", "state of hand was empty before and holding bow afterwards", "distance of my dominant hand was below waist before and above waist afterwards", "state of non-dominant hand was empty before and holding bow afterwards"]}
{"id": "Shoot an arrow|2", "answers": ["location of dominant hand was elsewhere before and held in hand afterwards", "location of bow was in hand before and in air afterwards", "location of dominant hand was elsewhere before and with your dominant hand afterwards", "state of hand was empty before and holding arrow afterwards", "state of arrow was free before and held afterwards", "orientation of dominant hand was horizontal before and vertical afterwards", "hand of hand was holding nothing before and holding arrow afterwards", "fullness of hand was empty before and full afterwards."]}
{"id": "Shoot an arrow|3", "answers": ["location of dominant hand was elsewhere before and on the bow afterwards", "state of arm was down before and up afterwards", "location of arrow was in hand before and on ground afterwards", "orientation of non-bowling hand was empty before and holding arrow afterwards", "state of hand was empty before and holding arrow afterwards", "action of dominant hand was holding the bow before and pulling the arrow afterwards", "location of arrow was in hand before and on ground afterwards."]}
{"id": "Shoot an arrow|4", "answers": ["direction of string was held by dominant hand before and pulled backwards afterwards", "state of the bow string was attached to the bow before and pulled back from the bow afterwards", "position of arrow was pointing up before and pointing down afterwards", "location of arrow was in hand before and on string afterwards", "location of bow string was on the table before and pulled back from the table afterwards", "position of the bow string was in a different position before and now in a position similar to arrow afterwards", "location of bow string was on the table before and on the string afterwards", "location of arrow was pointing up before and pointing down afterwards."]}
{"id": "Shoot an arrow|5", "answers": ["state of arrow was aimed at string before and aimed in the opposite direction afterwards"]}
{"id": "Shoot an arrow|6", "answers": ["position of bow string was pulled back before and pulled back afterwards", "state of back was bent before and straight afterwards", "orientation of bow was pulled back before and pulled in the opposite direction afterwards."]}
{"id": "Shoot an arrow|7", "answers": ["state of the bow was still before and now released afterwards", "location of string was pulled back before and now released afterwards", "orientation of hand was closed before and open afterwards."]}
{"id": "Taking an at-home COVID test|1", "answers": ["state of box was closed before and open afterwards", "openness of packaging was closed before and open afterwards", "location of packaging was on the table before and in the box afterwards", "state of the box was closed before and open afterwards", "weight of box was lighter before and heavier afterwards", "location of wrapper was in box before and on box afterwards", "volume of box was empty before and full afterwards", "weight of package was lighter before and heavier afterwards", "openness of packaging was closed before and open afterwards."]}
{"id": "Taking an at-home COVID test|2", "answers": ["cleanness of package was dirty before and clean afterwards", "state of package was sealed before and opened afterwards", "location of skin was on the nose before and on the bottle afterwards", "composition of mouth was filled with saliva before and dry afterwards", "location of person was outside the package before and inside the package afterwards", "location of swab was on the person before and in the trash afterwards", "moisture of person's bottle was dry before and wet afterwards", "location of person was at home before and at the office afterwards", "cleanness of bottle was dirty before and clean afterwards", "state of bottle was sealed before and opened afterwards", "location of bowl was on the counter before and in the package afterwards."]}
{"id": "Taking an at-home COVID test|3", "answers": ["location of cap was on the cap before and off the cap afterwards", "location of cap was on the nose before and off the nose afterwards", "location of nose was on the bottle before and nose clean afterwards", "orientation of bottle was open before and closed with a cap afterwards", "volume of nose was covered in scooge before and uncovered afterwards", "moisture of cap was dry before and wet afterwards", "moisture of cap was dry before and wet afterwards", "location of cap was on the bottle before and on the nose afterwards", "orientation of nose was vertical before and horizontal afterwards", "container of nose was open before and closed with cap afterwards."]}
{"id": "Taking an at-home COVID test|4", "answers": ["location of swab was in bottle before and in mouth afterwards", "state of mouth was dry before and moist afterwards", "moisture of swab was dry before and wet afterwards", "composition of nose was dry before and moist afterwards", "location of swab was in bucket before and on sink afterwards", "location of swab was in bucket before and on sink afterwards", "size of swab was small before and large afterwards", "size of face was small before and large afterwards."]}
{"id": "Taking an at-home COVID test|5", "answers": ["state of container was empty before and full afterwards", "moisture of cap was dry before and wet afterwards", "moisture of bowl was dry before and wet afterwards", "location of swab was in bowl before and in container afterwards", "location of swab was in bowl before and in container afterwards", "volume of container was empty before and full afterwards", "state of nose was dry before and wet afterwards", "wetness of swab was in bowl before and in liquid container afterwards", "moisture of container was dry before and wet afterwards", "state of liquid container was empty before and filled with nose and throat swab afterwards."]}
{"id": "Taking an at-home COVID test|6", "answers": ["state of nose was open before and closed afterwards", "moisture of swab was wet before and dry afterwards", "state of container was open before and closed afterwards", "location of swab was in bowl before and in container afterwards", "location of container was on table before and in hand afterwards", "state of the bowl was open before and sealed afterwards", "visibility of the container was visible before and invisible afterwards", "composition of the bowl was open before and closed afterwards", "volume of container was empty before and full afterwards", "orientation of container was open before and closed afterwards", "moisture of container was wet before and dry afterwards", "state of bowl was open before and sealed afterwards", "state of nose was open before and closed afterwards."]}
{"id": "Taking an at-home COVID test|7", "answers": ["state of bowl was empty before and full afterwards", "location of container was on the counter before and in the mixing cup afterwards", "moisture of container was dry before and wet afterwards", "weight of bowl was lighter before and heavier afterwards", "moisture of swab was dry before and wet afterwards", "volume of container was empty before and full afterwards", "moisture of bowl was dry before and wet afterwards", "wetness of container was dry before and wet afterwards", "fullness of mixing cup was emptier before and fuller afterwards", "composition of container was dry before and moist afterwards."]}
{"id": "Taking an at-home COVID test|8", "answers": ["volume of container was full before and empty afterwards", "moisture of glass was dry before and wet afterwards", "state of device was empty before and full afterwards", "volume of container was full before and empty afterwards", "pressure of hand was relaxed before and gripped afterwards", "weight of device was lighter before and heavier afterwards", "location of liquid was in the container before and inside the device afterwards", "volume of container was full before and empty afterwards", "location of container was on the table before and in the hand afterwards", "location of liquid was in container before and inside device afterwards", "pressure of container was open before and closed afterwards."]}
{"id": "Taking an at-home COVID test|9", "answers": ["volume of bottle was full before and empty afterwards", "volume of container was full before and empty afterwards", "moisture of spoon was dry before and wet afterwards", "temperature of container was room temperature before and cold afterwards", "orientation of container was open before and closed with lid afterwards", "volume of bottle was full before and empty afterwards", "location of liquid was inside container before and outside container afterwards", "state of container was opened before and closed afterwards."]}
{"id": "Taking an at-home COVID test|10", "answers": ["state of device was idle before and used afterwards", "knowledge of comprehension of the numbers was absent before and present afterwards", "location of device was in hands before and on the table afterwards", "location of tablet was in hands before and in the mouth afterwards."]}
{"id": "Wash hands with soap|1", "answers": ["moisture of glas was dry before and wet afterwards", "location of water was in kettle before and in hand afterwards", "moisture of glas was dry before and wet afterwards", "moisture of glas was dry before and wet afterwards", "state of water was off before and on afterwards"]}
{"id": "Wash hands with soap|2", "answers": ["location of soap was in bottle before and in hands afterwards", "location of soap dispenser was in cupboard before and in hand afterwards", "weight of bottle was heavier before and lighter afterwards", "location of water was in faucet before and in spray bottle afterwards", "volume of bottle was full before and empty afterwards", "volume of basin was full before and empty afterwards", "motion of pump was still before and moving afterwards", "location of water was in pipes before and in spray bottle afterwards", "location of soap dispenser was at home before and at hand afterwards."]}
{"id": "Wash hands with soap|3", "answers": ["volume of mixing bowl was full before and empty afterwards", "location of soap was in mixing bowl before and in hands afterwards", "location of water was in pipes before and in mixing cup afterwards", "state of soap mix was mixed before and poured afterwards"]}
{"id": "Wash hands with soap|4", "answers": ["fullness of hand was empty before and full afterwards", "location of soap was in the bottle before and in the water afterwards"]}
{"id": "Wash hands with soap|5", "answers": ["location of soap was in the bath before and on the hands afterwards", "location of soap was in the bath before and on the hands afterwards", "fullness of bath towel was full before and empty afterwards."]}
{"id": "Making boba milk tea|1", "answers": ["electric conductivity of stove was off before and on afterwards", "location of water was in faucet before and in bowl afterwards", "wetness of bowl was dry before and wet afterwards", "location of boiling water was in the kettle before and in the bowl afterwards", "temperature of water was cool before and hotter afterwards", "temperature of water was at room temperature before and hot afterwards", "temperature of tap was cool before and hot afterwards", "weight of kettle was heavier before and lighter afterwards", "temperature of water was cold before and boiling afterwards", "taste of water was bland before and tasty afterwards", "color of water was clear before and colored afterwards", "temperature of bowl was cool before and hot afterwards", "fullness of bucket was more full before and less full afterwards", "temperature of water was tepid before and hot afterwards", "weight of bucket was light before and heavy afterwards", "location of hot water was in the faucet before and in the bowl afterwards", "electric conductivity of stove was turned off before and turned on afterwards."]}
{"id": "Making boba milk tea|2", "answers": ["wetness of spoon was dry before and wet afterwards", "state of powder was separate before and mixed afterwards", "temperature of water was cool before and hot afterwards", "moisture of spoon was dry before and wet afterwards", "state of water was unmixed before and mixed afterwards", "weight of bowl was lighter before and heavier afterwards", "state of boba powder was separate before and mixed afterwards", "location of water was in pot before and in bowl afterwards", "weight of mixing bowl was lighter before and heavier afterwards", "location of boba powder was in packet before and in bowl afterwards", "composition of water was pure before and mixed with ingredients afterwards", "location of boba powder was in packet before and in bowl afterwards", "moisture of spoon was dry before and wet afterwards", "location of powder was in packet before and in bowl afterwards", "weight of mixing bowl was lighter before and heavier afterwards."]}
{"id": "Making boba milk tea|3", "answers": ["temperature of boba powder was cold before and warm afterwards", "temperature of water was cold before and boiling afterwards", "temperature of mixture was cool before and hot afterwards", "temperature of water was cool before and hot afterwards", "power of stove was off before and on afterwards", "temperature of water was cool before and hot afterwards", "state of mixture was uncooked before and cooked afterwards", "temperature of boba powder was cool before and warm afterwards", "composition of water was pure before and mixed with tapioca balls afterwards", "temperature of water was cold before and hot afterwards"]}
{"id": "Making boba milk tea|4", "answers": ["There will be no change."]}
{"id": "Making boba milk tea|5", "answers": ["location of ice was in the freezer before and in the bowl afterwards", "temperature of the ice container was warmer before and colder afterwards", "weight of the bowl was lighter before and heavier afterwards", "location of the ice was outside of the bowl before and inside the bowl afterwards", "fullness of bowl was emptier before and fuller afterwards", "location of the ice container was in the freezer before and on the tapioca balls afterwards", "temperature of water was hot before and cooled down afterwards", "temperature of the bowl was hotter before and cooler afterwards", "weight of bowl was light before and heavier afterwards."]}
{"id": "Making boba milk tea|6", "answers": ["temperature of mixture was warmer before and colder afterwards", "fullness of cup was less full before and more full afterwards", "temperature of boba drink was hot before and cooler afterwards", "weight of bottle was heavier before and lighter afterwards", "location of drink was in the bottle before and in the cup afterwards", "weight of bowl was lighter before and heavier afterwards", "volume of cup was empty before and full afterwards", "location of mixture was in bowl before and in glass afterwards", "temperature of boba drink was warm before and cold afterwards."]}
{"id": "Making boba milk tea|7", "answers": ["composition of mixture was separate before and mixed afterwards", "weight of the bowl was lighter before and heavier afterwards", "state of strainer was in the container before and poured over the mixture afterwards", "location of drink was in a bowl before and in a cup afterwards", "weight of the bowl was lighter before and heavier afterwards", "temperature of drink was hot before and cooled afterwards", "volume of bowl was full before and empty afterwards."]}
{"id": "Climbing a rock|1", "answers": ["state of hand was loose before and gripped afterwards"]}
{"id": "Climbing a rock|2", "answers": ["There will be no change."]}
{"id": "Climbing a rock|3", "answers": ["There will be no change."]}
{"id": "Climbing a rock|4", "answers": ["position of body was down before and up afterwards"]}
{"id": "Climbing a rock|5", "answers": ["There will be no change."]}
{"id": "Climbing a rock|6", "answers": ["power of grip was more relaxed before and more fierce afterwards."]}
{"id": "Changing a flat tire with a spare tire|1", "answers": ["container of tire was partially loaded before and fully loaded afterwards", "location of tire was in the garage before and on the workbench afterwards", "location of tire was in box before and outside afterwards", "location of tire was on the work surface before and in a container afterwards", "weight of the tire was lighter before and heavier afterwards", "fullness of container was emptier before and fuller afterwards", "location of tire was on the work surface before and in the hand afterwards", "location of the tire was elsewhere before and in the container afterwards", "container of tire was empty before and full afterwards", "fullness of tire container was empty before and full afterwards", "container of wheel was full before and empty afterwards."]}
{"id": "Changing a flat tire with a spare tire|2", "answers": ["position of tire was held up before and free afterwards", "location of tire was in stack before and on ground afterwards", "weight of tire was heavy before and light afterwards", "location of tire was stationary before and on side afterwards", "shape of tire was rolled up before and flat afterwards", "volume of stack was full before and empty afterwards", "location of tire was in hand before and on side afterwards."]}
{"id": "Changing a flat tire with a spare tire|3", "answers": ["state of car was flat before and lifted afterwards", "location of the car was in an upright position before and lifted afterwards", "orientation of tire was horizontal before and vertical afterwards", "height of the tire was shorter before and taller afterwards", "state of car was only lifting a tire once before and now lifting a tire two times afterwards", "shape of tire was straight before and twisted afterwards", "weight of the tire was lighter before and heavier afterwards", "height of tire height was lower before and higher afterwards", "location of scissor jack was in your hand before and on the ground afterwards", "weight of tire was flat before and lifted afterwards", "placement of the tire was out of position before and now in position afterwards."]}
{"id": "Changing a flat tire with a spare tire|4", "answers": ["state of nut was solid before and bolt separated afterwards", "position of the wrench was flat before and lifted afterwards", "angle of tire was level with floor before and 45 degrees to floor afterwards", "weight of the tire was lighter before and heavier afterwards", "speed of tire was stationary before and moving afterwards", "location of wrench was on ground before and in hand afterwards", "location of the wrench was in the garage before and in your hands afterwards", "orientation of tire bolt was perpendicular to floor before and parallel to floor afterwards", "location of nut was on floor before and in hand afterwards."]}
{"id": "Changing a flat tire with a spare tire|5", "answers": ["state of car was electrically connected before and disconnected afterwards", "location of the flat tire was off the car before and now on the car afterwards", "shape of tire was straight before and twisted afterwards", "location of tire was on axle before and off axle afterwards", "orientation of tire was upright before and turned afterwards", "resistance of car axle was free standing before and pushed backward afterwards", "shape of the tire was straight before and now twisted afterwards."]}
{"id": "Changing a flat tire with a spare tire|6", "answers": ["location of the tire was out of the axle before and on the axle afterwards", "weight of the car was lighter before and heavier afterwards", "location of tire was in the garage before and on the axle afterwards", "location of the tire was out of the axle before and now in the axle afterwards", "orientation of tire was horizontal before and vertical afterwards", "location of tire was on the ground before and above the car afterwards."]}
{"id": "Changing a flat tire with a spare tire|7", "answers": ["location of tire was on the ground before and on the axle afterwards", "pressure of hand was relaxed before and gripped afterwards", "location of tire was off the axle before and on the axle afterwards", "location of tire was free before and attached to car afterwards", "weight of car was lighter before and heavier afterwards", "state of axle was unattached before and attached afterwards", "placement of the tire was flat before and now pinned afterwards", "weight of the axle was lighter before and now heavier afterwards."]}
{"id": "Changing a flat tire with a spare tire|8", "answers": ["pressure of wheel was upright before and twisting afterwards", "securing of tire was locked in place before and free afterwards", "pressure of wheel was heavier before and lighter afterwards", "location of the wrench was on the table before and in the axling afterwards", "stability of the axling was loose before and tight afterwards", "strength of the axling was loose before and tight afterwards."]}
{"id": "Make bread|1", "answers": ["location of water was in cupboard before and in bowl afterwards", "location of salt was in bag before and in bowl afterwards", "weight of bowl was lighter before and heavier afterwards", "location of flour was in the package before and in the bowl afterwards", "volume of bowl was empty before and fuller afterwards", "location of water was in measuring cup before and in bowl afterwards", "volume of bowl was empty before and full afterwards", "fullness of bowl was empty before and full afterwards", "volume of bowl was empty before and full afterwards", "location of salt was in bag before and in bowl afterwards", "location of flour was in package before and in bowl afterwards", "cleanness of bowl was clean before and dirty afterwards."]}
{"id": "Make bread|2", "answers": ["wetness of yeast was dry before and wet afterwards", "location of water was in the measuring cup before and in the bowl afterwards", "wetness of bowl was dry before and wet afterwards", "location of water was in measuring cup before and in bowl afterwards", "location of warm water was in measuring cup before and in bowl afterwards", "location of water was in spoon before and in bowl afterwards", "location of salt was in measuring cup before and in bowl afterwards", "state of mixing bowl was empty before and full afterwards", "volume of bowl was empty before and fuller afterwards", "location of water was outside of bowl before and inside bowl afterwards", "wetness of flour was dry before and wet afterwards", "location of warm water was outside of bowl before and inside bowl afterwards", "location of salt was outside of bowl before and inside bowl afterwards."]}
{"id": "Make bread|3", "answers": ["texture of mixture was thinner before and thicker afterwards", "color of water was clear before and cloudy afterwards", "speed of mixer was still before and moving afterwards", "location of bowl was on table before and in hand afterwards", "location of bowl was clean before and dirty afterwards", "color of water was clear before and foamy afterwards", "composition of mixture was stratified before and mixed afterwards", "wetness of bowl was dry before and wet afterwards", "cleanness of spoon was clean before and dirty afterwards", "location of bowl was on the counter before and in the bowl afterwards", "composition of mixture was lumpy before and foamy afterwards."]}
{"id": "Make bread|4", "answers": ["wetness of salt was dry before and wet afterwards", "location of flour was in container before and in bowl afterwards", "location of salt was in container before and in bowl afterwards", "temperature of mixture was cool before and warm afterwards", "volume of bowl was empty before and full afterwards", "state of mixture was separate before and mixed afterwards", "volume of bowl was empty before and fuller afterwards", "location of flour was in packet before and in bowl afterwards", "location of salt was in bag before and in bowl afterwards", "location of flour was in its place before and in bowl afterwards", "weight of bowl was lighter before and heavier afterwards", "temperature of yeast was cool before and warm afterwards."]}
{"id": "Make bread|5", "answers": ["state of dough was solitary before and combined afterwards", "location of dough was on counter before and in knead afterwards", "texture of mixture was loose before and smooth afterwards", "location of dough was on table before and in cloth afterwards", "state of dough was loose before and formed afterwards", "state of mixture was solitary before and combined afterwards."]}
{"id": "Make bread|6", "answers": ["shape of dough was balled before and unshaped afterwards", "state of dough was raw before and risen afterwards", "size of dough was in one piece before and in multiple pieces afterwards", "shape of dough was round before and flat afterwards", "moisture of bowl was dry before and wet afterwards", "shape of dough was round before and halved afterwards."]}
{"id": "Make bread|7", "answers": ["form of dough was balled before and risen afterwards", "location of the loaf was in a bowl before and in a pan afterwards", "temperature of dough was cold before and hot afterwards", "location of mixture was in bowl before and in pan afterwards", "power of oven was off before and on afterwards", "weight of the loaf was lighter before and heavier afterwards", "moisture of dough was dry before and wet afterwards", "location of dough was in a bowl before and in a pan afterwards", "fullness of bowl was more full before and less full afterwards", "location of mixture was in bowl before and in pan afterwards", "form of dough was loose before and in ball afterwards", "location of mixture was in a bowl before and in a loaf afterwards", "location of bowl was on table before and in loaf afterwards."]}
{"id": "Make bread|8", "answers": ["location of bread was in oven before and in oven afterwards", "temperature of dough was cool before and hot afterwards", "temperature of oven was cold before and hot afterwards", "temperature of bread was room temperature before and hot afterwards", "time of the time was earlier before and later afterwards", "power of oven was off before and on afterwards", "moisture of bread was dry before and wet afterwards", "temperature of dough was cold before and hot afterwards", "orientation of bread was on cookie sheet before and on center of cookie sheet afterwards", "state of mixture was raw before and cooked afterwards", "color of dough was white before and golden brown afterwards", "texture of dough was soft before and firm afterwards", "container of oven was empty before and full afterwards", "state of mixture was raw before and cooked afterwards."]}
{"id": "Make bread|9", "answers": ["location of bread was in the oven before and on the counter afterwards", "temperature of bread was hot before and cool afterwards", "power of oven was on before and off afterwards", "texture of dough was soft before and firmer afterwards", "temperature of oven was hot before and cool afterwards", "location of bread was on table before and in oven afterwards", "state of loaf was raw before and cooked afterwards", "texture of dough was soft before and firmer afterwards", "state of oven was on before and off afterwards", "temperature of loaf was hot before and cold afterwards", "location of bread was in oven before and in pan afterwards."]}
{"id": "Make bread|10", "answers": ["location of bread was in the oven before and on a plate afterwards", "location of bread was in oven before and in pan afterwards", "time of the bread was cooking before and done afterwards", "temperature of bread was hot before and cool afterwards", "texture of bread was soft before and crunchy afterwards", "power of oven was on before and off afterwards", "moisture of bread was wet before and dry afterwards", "temperature of oven was hotter before and cooler afterwards", "temperature of bread was hot before and cold afterwards", "composition of bread was raw before and cooked afterwards", "temperature of oven was hot before and cool afterwards."]}
{"id": "Make instant cup noodles|1", "answers": ["plastic packaging of plastic was on roll before and off roll afterwards", "location of plastic packaging was in box before and on counter afterwards", "location of plastic wrap was in box before and on counter afterwards", "state of table was covered before and uncovered afterwards", "location of plastic was in the box before and removed from box afterwards", "location of plastic packaging was on the table before and on the table afterwards."]}
{"id": "Make instant cup noodles|2", "answers": ["state of cup halfway was closed before and open afterwards", "location of plastic was on counter before and in cup afterwards", "state of top half of cup was closed before and open afterwards", "orientation of cup halfway was open before and closed afterwards."]}
{"id": "Make instant cup noodles|3", "answers": ["weight of cup half way was heavier before and lighter afterwards", "location of boiling water was in the cup before and in the cup afterwards", "fullness of cup half way was emptier before and fuller afterwards", "fullness of cup was partially full before and all too full afterwards", "location of water was in the cup before and in the cup afterwards", "wetness of cup half way was dry before and wet afterwards", "weight of cup half way was lighter before and heavier afterwards", "wetness of cup half way was dry before and wet afterwards", "location of boiling water was in the cup before and in the cup afterwards."]}
{"id": "Make instant cup noodles|4", "answers": ["location of lid was on the counter before and on the cup afterwards", "openness of lid was closed before and open afterwards", "state of cup was open before and closed afterwards", "openness of lid was closed before and open afterwards", "state of cup was open before and closed afterwards", "wetness of spoon was dry before and wet afterwards", "location of water was in the cup before and in the cup afterwards", "state of cup was open before and closed afterwards", "location of spoon was outside of cup before and inside cup afterwards."]}
{"id": "Make instant cup noodles|5", "answers": ["state of timer was off before and on afterwards", "location of the timer was absent before and present afterwards", "location of timer was on the counter before and in the cup afterwards", "step of timer was unlit before and lit afterwards", "electric conductivity of stove was turned off before and turned on afterwards", "state of timer was off before and on afterwards", "setting of timer was unset before and set afterwards", "location of timer finger was touching air before and touching the knob afterwards."]}
{"id": "Make instant cup noodles|6", "answers": ["electric conductivity of timer was turned off before and turned on afterwards", "state of timer was dormant before and running afterwards", "time of the timer was running out before and done running afterwards", "power of timer was off before and on afterwards", "time of timer was off before and on afterwards", "wetness of cup halfway was dry before and wet afterwards", "location of water was in the cup before and in the cup afterwards."]}
{"id": "Make instant cup noodles|7", "answers": ["state of person was idle before and enjoying the noodles afterwards", "container of cup was empty before and full afterwards"]}
{"id": "Do laundry|1", "answers": ["There will be no change."]}
{"id": "Do laundry|2", "answers": ["location of pocket was unnoticed before and found afterwards"]}
{"id": "Do laundry|3", "answers": ["volume of washing machine was empty before and full afterwards", "location of clothes were on the table before and in the washing machine afterwards", "weight of the basket was lighter before and heavier afterwards", "state of clothing was in machine before and purchased afterwards", "state of washing machine was off before and on afterwards", "location of white clothes were outside washing machine before and inside washing machine afterwards", "volume of basket was empty before and full afterwards."]}
{"id": "Do laundry|4", "answers": ["location of soap was in a bottle before and in the washing machine afterwards", "weight of the bottle was heavier before and lighter afterwards", "weight of the washing machine was lighter before and heavier with water afterwards", "fullness of washing machine was empty before and full afterwards", "temperature of the water was warmer before and cooler afterwards", "location of soap was in bottle before and in washing machine afterwards", "volume of washing machine was empty before and full afterwards", "location of water was in pipes before and in sink afterwards", "temperature of machine was cool before and warm afterwards", "volume of washing machine was empty before and full afterwards", "location of soap was outside of machine before and inside machine afterwards", "temperature of water was hot before and cooling afterwards", "fullness of washing machine was empty before and full afterwards", "volume of the bottle was fuller before and less full afterwards."]}
{"id": "Do laundry|5", "answers": ["state of pump was off before and on afterwards", "electric conductivity of washing machine was turned off before and turned on afterwards", "movement of water was still before and spinning afterwards", "location of soap was in the bottle before and in the washing machine afterwards", "temperature of water was cold before and warm afterwards", "temperature of water was cool before and hot afterwards", "volume of washing machine was empty before and full afterwards", "speed of washing machine was still before and moving afterwards."]}
{"id": "Do laundry|6", "answers": ["state of motor was off before and on afterwards", "temperature of water was cold before and hot afterwards", "state of wicking machine was off before and on afterwards", "power of washing machine was off before and on afterwards", "power of spinning pump was off before and on afterwards", "state of washing machine was off before and on afterwards", "state of washing machine was off before and on afterwards", "orientation of washing machine was upside down before and vertically afterwards", "electric conductivity of washing machine was turned off before and turned on afterwards."]}
{"id": "Do laundry|7", "answers": ["power of washing machine was off before and on afterwards", "electric conductivity of washing machine was turned off before and turned on afterwards", "electric conductivity of washing machine was turned off before and turned on afterwards", "state of washing machine was idle before and finished afterwards", "temperature of the water was warmer before and colder afterwards", "speed of machine was moving slowly before and moving fast afterwards", "state of washing machine was off before and on afterwards", "electric conductivity of washing machine was turned off before and turned on afterwards."]}
{"id": "Do laundry|8", "answers": ["volume of washing machine was full before and empty afterwards", "location of clothes were on the washing machine before and in the trash afterwards", "electric conductivity of washing machine was turned off before and turned on afterwards", "location of clothes were on the machine before and in the washing machine afterwards."]}
{"id": "Hard-boil an egg.|1", "answers": ["wetness of pot was dry before and wet afterwards", "state of pot was empty before and full afterwards", "volume of water volume was greater before and lesser afterwards", "temperature of pot was room temperature before and hot afterwards", "location of cold water was absent before and in pot afterwards", "temperature of water was cold before and warm afterwards", "wetness of pot was dry before and wet afterwards", "volume of pot was empty before and full afterwards", "volume of pot was empty before and full afterwards", "volume of pot was empty before and full afterwards", "temperature of water was cooler before and hotter afterwards."]}
{"id": "Hard-boil an egg.|2", "answers": ["moisture of pot was dry before and wet afterwards", "location of egg was outside of pot before and inside of pot afterwards", "volume of pot was empty before and full afterwards", "temperature of egg was room temperature before and cold afterwards", "location of water was outside of pot before and inside of pot afterwards", "state of water faucet was off before and on afterwards", "fullness of pot was empty before and full afterwards", "cleanness of pot was clean before and dirty afterwards", "location of egg was in package before and in pot afterwards", "volume of pot was empty before and full afterwards", "weight of egg pan was lighter before and heavier afterwards", "location of egg was outside of pot before and inside of pot afterwards."]}
{"id": "Hard-boil an egg.|3", "answers": ["temperature of pot was cool before and hot afterwards", "temperature of pot was cold before and hot afterwards", "location of egg was outside of pot before and inside pot afterwards", "temperature of pot was cool before and hot afterwards", "power of stove was off before and on afterwards", "temperature of stove was cold before and hot afterwards", "temperature of water was cold before and boiling afterwards", "temperature of egg was cool before and hot afterwards", "temperature of water was cold before and hot afterwards", "location of lid was off of the stove before and on the stove afterwards."]}
{"id": "Hard-boil an egg.|4", "answers": ["movement of water was still before and boiling afterwards", "texture of pot was smooth before and sticky afterwards", "motion of water was still before and simmering afterwards", "temperature of water was cold before and boiling afterwards", "state of stove was off before and on afterwards", "stability of pan was empty before and full afterwards", "temperature of water was cold before and hot afterwards", "location of lid was off of the stove before and on the stove afterwards", "temperature of water was room temperature before and hot afterwards", "hardness of water was hard before and soft afterwards", "moisture of pot was dry before and wet afterwards."]}
{"id": "Hard-boil an egg.|5", "answers": ["temperature of egg was cool before and hot afterwards", "motion of water was still before and boiling afterwards", "color of water was clear before and brown afterwards", "state of stove was off before and on afterwards", "temperature of water was room temperature before and hot afterwards", "power of stove was off before and on afterwards", "temperature of water was cool before and hot afterwards", "volume of pot was filled with boiling water before and filled with less liquid afterwards", "state of egg was raw before and cooked afterwards", "texture of egg was raw before and cooked afterwards", "temperature of water was cold before and hot afterwards", "texture of water was soft before and harder afterwards."]}
{"id": "Hard-boil an egg.|6", "answers": ["temperature of pot was hotter before and cooler afterwards", "volume of pot was fuller before and emptier afterwards", "state of stove was off before and on afterwards", "temperature of egg was hot before and cooler afterwards", "location of pot was on stove before and off stove afterwards."]}
{"id": "Hard-boil an egg.|7", "answers": ["state of egg was hot before and cold afterwards", "location of lid was on the counter before and on the burner afterwards", "temperature of pot was hot before and cool afterwards", "state of egg was hard before and soft afterwards", "temperature of pot was cool before and hot afterwards", "location of egg was in the pot before and removed afterwards", "temperature of stove was cool before and hot afterwards", "temperature of egg was cool before and hot afterwards", "temperature of stove was cool before and hot afterwards."]}
{"id": "Mail a postcard|1", "answers": ["object of postcard was unowned before and owned by you afterwards", "location of the postcard was elsewher before and with you afterwards", "location of postcard was at the store before and with you afterwards."]}
{"id": "Mail a postcard|2", "answers": ["location of postcard was on the table before and on the table afterwards", "location of postcard was in a package before and on the table afterwards", "writing of message was blank before and written on afterwards"]}
{"id": "Mail a postcard|3", "answers": ["contents of address bar was empty before and fuller afterwards", "content of postcard was empty before and written on afterwards", "location of person was outside of state before and inside of state afterwards", "location of address was in person before and added to postcard afterwards", "step of person was empty handed before and written on afterwards."]}
{"id": "Mail a postcard|4", "answers": ["location of postcard was at the store before and in the house afterwards", "location of postcard was at the store before and in the house afterwards", "volume of cash register was emptier before and fuller afterwards."]}
{"id": "Mail a postcard|5", "answers": ["location of stamp was at store before and in your house afterwards", "ownership of stamp was in store before and bought by you afterwards"]}
{"id": "Mail a postcard|6", "answers": ["location of stamp was in package before and affixed to poster afterwards", "location of stamp was unattached before and attached afterwards", "state of stamp was unattached before and glued afterwards."]}
{"id": "Mail a postcard|7", "answers": ["fullness of mailbox was less full before and more full afterwards", "location of postcard was in envelope before and in mailbox afterwards", "location of stamp was in package before and in mailbox afterwards."]}
{"id": "Drying damp book|1", "answers": ["cleanness of floor was cluttered before and cleared afterwards", "space of floor was cluttered before and empty afterwards", "dryness of room was dry before and damp afterwards", "cleanness of room was clean before and dirty afterwards", "state of room was vacant before and found afterwards", "dryness of grass was dry before and damp afterwards."]}
{"id": "Drying damp book|2", "answers": ["location of book was in the drawer before and next to the room afterwards", "orientation of book was lying horizontally before and upright in room afterwards", "state of room was empty before and read afterwards", "state of dry room was unmarked before and found afterwards", "position of book was loose before and upright afterwards", "position of book was off the book before and on the book afterwards."]}
{"id": "Drying damp book|3", "answers": ["state of book was in hands before and upright afterwards", "state of hand was empty before and holding book afterwards", "orientation of book was lying horizontally before and lying vertically afterwards", "location of book was on the table before and in the hands afterwards."]}
{"id": "Drying damp book|4", "answers": ["state of book was in need of air movement monitor before and turned on afterwards", "orientation of book was in a pile before and upright in room Fan out pages Direct airflow on book was unventilated before and ventilated afterwards", "state of book was in need of manual before and manual afterwards", "location of book was on table before and in hands afterwards."]}
{"id": "Drying damp book|5", "answers": ["weight of book was heavier before and lighter afterwards", "location of book was under weight before and tucked under weight afterwards", "location of book was under heavy before and under light afterwards"]}
{"id": "Fold a paper airplane|1", "answers": ["state of paper was uncreased before and reased afterwards", "location of paper was in hand before and on desk afterwards", "location of pen was on the table before and in the hand afterwards", "position of hand was empty before and holding paper afterwards", "position of paper was folded before and flat afterwards", "paper of paper was folded before and uncreased afterwards."]}
{"id": "Fold a paper airplane|2", "answers": ["location of paper was in hand before and in front of a person afterwards", "location of paper was on a table before and in front of a person afterwards", "size of paper was uncreased before and half-length afterwards", "location of crease paper was in a package before and on your desk afterwards", "state of paper was undisturbed before and moved afterwards", "orientation of person was facing paper before and facing paper afterwards."]}
{"id": "Fold a paper airplane|3", "answers": ["state of paper was folded before and open afterwards", "state of paper was folded before and reassembled afterwards", "position of folded paper was folded before and open afterwards", "state of paper was closed before and open afterwards", "location of paper was on table before and in front of a person afterwards", "state of crease was uncovered before and covered afterwards", "orientation of paper was folded before and folded afterwards", "location of crease paper was on the table before and in front of a person afterwards."]}
{"id": "Fold a paper airplane|4", "answers": ["state of paper was folded before and open afterwards", "shape of paper was flat before and creased afterwards", "size of paper was flat before and folded afterwards", "state of paper was uncreased before and re-opened afterwards", "state of crease was uncreased before and folded afterwards", "shape of paper was flat before and folded afterwards", "length of paper was long before and cut in half afterwards."]}
{"id": "Fold a paper airplane|5", "answers": ["state of paper was creased before and folded afterwards", "shape of paper was flat before and folded afterwards", "shape of paper was flat before and folded afterwards", "size of paper was larger before and smaller afterwards", "state of paper was opened before and closed afterwards", "state of paper was whole before and folded afterwards", "shape of paper was flat before and folded afterwards."]}
{"id": "Fold a paper airplane|6", "answers": ["shape of paper was flat before and folded afterwards", "size of paper was bigger before and smaller afterwards", "state of paper was new before and folded afterwards", "shape of paper was flat before and folded afterwards", "shape of paper was straight before and creased afterwards", "state of paper was new before and folded afterwards", "shape of paper was flat before and creased afterwards."]}
{"id": "Fold a paper airplane|7", "answers": ["composition of crease was unventilated before and creased afterwards", "shape of paper was flat before and folded afterwards", "state of paper was uncreased before and creased afterwards", "shape of paper was flat before and folded afterwards", "state of paper was straight before and turned afterwards", "shape of paper was flat before and folded afterwards."]}
{"id": "Wrapping a Toga|1", "answers": ["shape of cloth was flat before and folded in half afterwards", "state of the folded material was straight before and now folded afterwards", "shape of cloth was flat before and folded afterwards", "shape of cloth was flat before and folded afterwards", "length of cloth was single length before and double length afterwards."]}
{"id": "Wrapping a Toga|2", "answers": ["shape of cloth was flat before and folded afterwards", "location of cloth was in usual location before and in hand afterwards", "length of cloth was straight before and folded in half afterwards", "state of cloth was unfolded before and folded afterwards", "location of cloth was in the linen closet before and in the dressing area afterwards", "shape of cloth was flat before and folded afterwards", "shape of cloth was flat before and folded in half afterwards", "state of shoulder was bare before and covered by cloth afterwards", "shape of cloth was flat before and folded afterwards", "length of cloth was long before and shorter afterwards."]}
{"id": "Wrapping a Toga|3", "answers": ["location of draping cloth was on table before and in hand afterwards", "position of draping cloth was bare before and draped afterwards", "state of cloth was loose before and now raked afterwards", "length of draping cloth was flat before and folded afterwards", "shape of cloth was flat before and folded afterwards", "shape of drape was straight before and in half afterwards"]}
{"id": "Wrapping a Toga|4", "answers": ["state of cloth was bare before and wrapped afterwards", "state of cloth was exposed before and wrapped afterwards", "width of the cloth was wider before and narrower afterwards", "shape of cloth was flat before and folded afterwards"]}
{"id": "Wrapping a Toga|5", "answers": ["state of cloth was loose before and tuck tied afterwards", "location of draping was loose before and under the shoulder afterwards", "location of cloth was on the table before and wrapped around the shoulder afterwards", "location of draping cloth was in hand before and in front of shoulder afterwards"]}
{"id": "Prepare a Milkshake|1", "answers": ["temperature of ice cream was cold before and melting afterwards", "location of ice cream container was on counter before and in blender afterwards", "container of blender was empty before and full afterwards", "location of ice cream container was on the counter before and in the blender afterwards", "temperature of ice cream was room temperature before and cold afterwards", "weight of blender was light before and heavy afterwards", "location of ice cream was outside of blender before and inside blender afterwards", "location of ice cream was on counter before and in blender afterwards", "temperature of mixture was room temperature before and cold afterwards", "temperature of ice cream was cooler before and warmer afterwards", "volume of blender was empty before and full afterwards."]}
{"id": "Prepare a Milkshake|2", "answers": ["volume of blender was empty before and full afterwards", "container of blender was empty before and filled with ice cream afterwards", "size of ice cream was small before and large afterwards", "cleanness of blender was clean before and dirty afterwards", "weight of blender was light before and heavy afterwards", "location of milk was in the fridge before and in the blender afterwards", "location of ice cream was in the freezer before and in the blender afterwards", "container of blender was empty before and filled with milk afterwards", "moisture of ice cream was dry before and wet afterwards", "container of blender was empty before and filled with milk afterwards", "location of milk was in carton before and in blender afterwards", "moisture of blender was dry before and wet afterwards", "composition of ice cream was pureed milk before and combined with ice cream afterwards", "state of ice cream was plain before and combines ice cream afterwards", "temperature of milk was cold before and warm afterwards"]}
{"id": "Prepare a Milkshake|3", "answers": ["location of milk was in the fridge before and in the blender afterwards", "location of milk was outside blender before and inside blender afterwards", "temperature of milk was room temperature before and colder afterwards", "temperature of blender was warmer before and cooler afterwards", "temperature of ice cream was room temperature before and cold afterwards", "volume of blender was empty before and full afterwards", "temperature of ice cream was room temperature before and cold afterwards", "shape of ice cream was flat before and rounded afterwards", "moisture of blender was dry before and wet afterwards."]}
{"id": "Prepare a Milkshake|4", "answers": ["state of blender was on before and off afterwards", "state of blender was on before and off afterwards", "location of milk was in the carton before and in the blender afterwards", "location of ice cream was in the freezer before and in the blender afterwards", "power of blender was off before and on afterwards", "composition of ice cream was whole before and blended afterwards", "moisture of blender was dry before and wet afterwards."]}
{"id": "Prepare a Milkshake|5", "answers": ["volume of blender was full before and empty afterwards", "location of mixture was in blender before and in cup afterwards", "weight of blender was heavier before and lighter afterwards", "size of ice cream was larger before and smaller afterwards", "wetness of blender was dry before and wetter afterwards", "state of cup was empty before and full afterwards", "location of mixture was in the blender before and in a cup afterwards", "weight of cup was light before and heavier afterwards", "cleanness of cup was clean before and dirty afterwards", "cleanness of blender was clean before and covered in mixture afterwards", "weight of blender was heavier before and lighter afterwards."]}
{"id": "Prepare a Milkshake|6", "answers": ["container of cup was empty before and full of ice cream afterwards", "fullness of blender was less full before and more full afterwards", "location of mixture was outside of blender before and inside of blender afterwards", "location of straw was outside of blender before and inside blender afterwards", "moisture of straw was dry before and wet afterwards", "cleanness of straw was clean before and dirty afterwards."]}
{"id": "Supercharge a Tesla|1", "answers": ["state of controller was unplugged before and plugged afterwards", "location of key was in a pocket before and in the console afterwards", "electric conductivity of car was turned off before and turned on afterwards", "location of current charge was missing before and present afterwards", "state of supercharger was off before and on afterwards", "electric conductivity of vehicle was turned off before and turned on afterwards", "electric conductivity of battery was dormant before and activated afterwards", "state of car was disconnected before and connected afterwards", "location of controller was missing before and present afterwards."]}
{"id": "Supercharge a Tesla|2", "answers": ["state of shifter was off before and on afterwards", "electric conductivity of car was turned off before and turned on afterwards", "location of shifter was stationary before and moved afterwards", "location of the mouse cursor was at the top of the screen before and at the top of the screen afterwards", "location of supercharger drive was missing from the car before and in the car afterwards", "location of shifter was in drive before and in park afterwards", "electric conductivity of the electric conductivity of the car was turned off before and turned on afterwards", "electric conductivity of car was turned off before and turned on afterwards."]}
{"id": "Supercharge a Tesla|3", "answers": ["location of shifter was in drive before and in stop afterwards", "electric conductivity of car was turned off before and turned on afterwards", "location of electric conductivity of the car was turned off before and in a supercharger afterwards", "location of car was at the store before and in the house afterwards", "state of the supercharger was unengaged before and engaged afterwards", "location of the shifter was in drive before and in stop afterwards", "state of the supercharger was away from the car before and in the car afterwards."]}
{"id": "Supercharge a Tesla|4", "answers": ["state of port was closed before and open afterwards", "electric conductivity of plug was disconnected before and plugged in afterwards", "location of charge port was on the floor before and in the console afterwards", "power of electric conductivity was off before and on afterwards", "state of port was closed before and open afterwards", "state of supercharger was off before and on afterwards."]}
{"id": "Supercharge a Tesla|5", "answers": ["state of port was closed before and open afterwards", "volume of charge port was full before and empty afterwards", "power of car power was off before and on afterwards", "location of plug was disconnected before and inserted afterwards", "state of supercharger was off before and on afterwards", "electric conductivity of car power was off before and on afterwards", "location of charge port was on the door before and in the driver's hand afterwards", "location of charge was unplugged into the car before and plugged into the car afterwards", "charge of port was empty before and full afterwards."]}
{"id": "Supercharge a Tesla|6", "answers": ["state of port was unplugged before and plugged afterwards", "state of the charge port was empty before and filled afterwards", "location of the charger was elsewhere before and in the charge port afterwards", "location of charger's door was closed before and open afterwards", "location of charger was away from car before and in car afterwards", "power of power was off before and on afterwards."]}
{"id": "Supercharge a Tesla|7", "answers": ["state of charger's charge port was empty before and full afterwards", "location of charger's charge port was in car before and outside car afterwards", "power of car was off before and on afterwards", "state of charge port was unplugged before and plugged in afterwards", "location of charge port was inside car before and outside car afterwards", "electric conductivity of vehicle was turned off before and turned on afterwards."]}
{"id": "Play music from a phone over bluetooth speaker|1", "answers": ["electric conductivity of bluetooth was turned off before and turned on afterwards", "location of bluetooth speaker was outside of psp before and inside psp afterwards", "placement of bluetooth speaker was unplaced before and placed into pairing mode afterwards", "state of psp was unconnected before and connected afterwards", "power of bluetooth was off before and on afterwards", "volume of psp was idle before and running afterwards", "orientation of bluetooth speaker was unconnected before and connected afterwards", "location of bluetooth speaker was in the legume before and in the psp afterwards."]}
{"id": "Play music from a phone over bluetooth speaker|2", "answers": ["state of battery was charged before and empty afterwards", "electric conductivity of bluetooth was turned off before and turned on afterwards", "electric conductivity of the phone was turned off before and turned on afterwards", "state of bluetooth was unconnected before and connected afterwards", "power of bluetooth was off before and on afterwards", "state of bluetooth was turned off before and open afterwards", "state of internet connection was unconnected before and connected afterwards"]}
{"id": "Play music from a phone over bluetooth speaker|3", "answers": ["state of screen was blank before and beeped afterwards", "step of bluetooth speaker was unselected before and selected afterwards", "electric conductivity of screen was turned off before and turned on afterwards", "volume of battery level was low before and high afterwards", "electric conductivity of psp was turned off before and turned on afterwards", "state of screen was off before and on afterwards", "orientation of box was closed before and open afterwards"]}
{"id": "Play music from a phone over bluetooth speaker|4", "answers": ["state of music application was closed before and open afterwards", "state of music was unselected before and selected afterwards", "electric conductivity of phone was turned off before and turned on afterwards", "electric conductivity of music was turned off before and turned on afterwards", "location of music application was unselected before and selected afterwards", "location of music was on the screen before and in the music application afterwards", "sound of music was quiet before and loud afterwards", "electric conductivity of phone was turned off before and turned on afterwards", "state of music was turned off before and selected afterwards", "location of key was outside ignition before and inside ignition afterwards", "state of phone was turned off before and turned on afterwards."]}
{"id": "Play music from a phone over bluetooth speaker|5", "answers": ["state of music application was unselected before and selected afterwards", "state of music was on before and off afterwards", "sound of music was silent before and playing afterwards", "state of music was off before and on afterwards", "step of music application was unselected before and selected afterwards", "power of music was off before and on afterwards", "state of music was turned off before and selected afterwards", "sound of music was silent before and playing afterwards."]}
{"id": "Remove shoe odor with baking soda|1", "answers": ["location of baking soda was in box before and in bowl afterwards", "location of baking soda was in cabinet before and on shoe afterwards", "location of shoe was on counter before and in hand afterwards", "cleanness of measuring cup was clean before and dirty afterwards", "location of baking soda was in the cabinet before and in the shoe afterwards", "fullness of bowl was empty before and more full afterwards", "location of baking soda was in box before and in shoe afterwards", "weight of shoe was lighter before and heavier afterwards", "cleanness of shoe was clean before and dirty afterwards", "location of baking soda was in its container before and in shoe afterwards", "volume of box was full before and empty afterwards."]}
{"id": "Remove shoe odor with baking soda|2", "answers": ["fullness of baking soda container was more full before and less full afterwards", "cleanness of shoe shaker was cleaner before and dirtier afterwards", "location of baking soda was in container before and in shoe afterwards", "wetness of baking soda was dry before and wet with water afterwards", "location of baking soda was in box before and in shoe afterwards", "composition of shoe shake was plain before and combined afterwards", "location of baking soda was in box before and in shoe afterwards", "location of spoon was outside of box before and inside box afterwards", "weight of shoe shake was lighter before and heavier afterwards", "location of spoon was outside of box before and inside box afterwards", "weight of shoe shake was light before and heavy afterwards", "location of baking soda was in a container before and in the shoe afterwards", "wetness of shoe shake was drier before and wetter afterwards."]}
{"id": "Remove shoe odor with baking soda|3", "answers": ["weight of shoe shake bottle was lighter before and heavier afterwards", "wetness of baking soda was dry before and wet afterwards", "state of shoe shake was empty before and full afterwards", "fullness of baking soda bottle was more full before and less full afterwards", "color of bottle was white before and brown afterwards", "location of baking soda was in a box before and in the shoe afterwards", "wetness of shoe polish was dry before and wet afterwards", "dryness of baking soda was dry before and wet afterwards", "weight of shoe shake bottle was heavier before and lighter afterwards."]}
{"id": "Remove shoe odor with baking soda|4", "answers": ["location of baking soda was in bag before and in shoe afterwards", "location of baking soda was in bag before and in shoe afterwards", "wetness of shoe was dry before and damp afterwards", "weight of shoe was lighter before and heavier afterwards", "cleanness of shoe was clean before and dirty afterwards", "moisture of baking soda was dry before and wet afterwards", "weight of shoe was light before and heavy afterwards", "wetness of shoe was dry before and wet afterwards", "wetness of baking soda was in bag before and in shoe afterwards", "weight of shoe was light before and heavy afterwards."]}
{"id": "Pour a beer into a glass|1", "answers": ["location of glass was in cupboard before and on counter afterwards", "state of glass was dirty before and clean afterwards", "cleanness of glass was covered in paper before and clean afterwards", "location of glass was on the table before and in a hand afterwards", "state of paper was pristine before and ripped afterwards", "location of glass was on table before and in hand afterwards", "cleanness of glass was dirty before and clean afterwards."]}
{"id": "Pour a beer into a glass|2", "answers": ["location of glass was on the table before and in the beer can afterwards", "location of glass was away from beer before and close afterwards", "orientation of glass was on counter horizontally before and vertically afterwards", "state of beer can or bottle was closed before and open afterwards."]}
{"id": "Pour a beer into a glass|3", "answers": ["location of glass was on the table before and held by the person afterwards", "location of glass was in hand before and in beer can afterwards", "orientation of person was sitting before and holding the beer afterwards", "volume of glass was empty before and full afterwards", "state of beer can was closed before and open afterwards."]}
{"id": "Pour a beer into a glass|4", "answers": ["temperature of glass was room temperature before and cold afterwards", "location of beer was in can before and in glass afterwards", "container of glass was empty before and full afterwards", "location of beer was in bottle before and in glass afterwards", "volume of bottle was full before and empty afterwards", "state of beer was liquid before and carbonated afterwards", "weight of bottle was heavier before and lighter afterwards", "fullness of glass was empty before and fuller afterwards", "composition of beer was pure before and infused afterwards", "composition of glass was empty before and full afterwards", "location of glass was in the can before and in the beer afterwards", "location of cap was on the bottle before and off the bottle afterwards", "location of cap was on the bottle before and off the bottle afterwards."]}
{"id": "Pour a beer into a glass|5", "answers": ["state of glass was empty before and full afterwards", "location of foam was in container before and in glass afterwards", "composition of beer can or bottle was empty before and full afterwards", "weight of glass was light before and heavy afterwards", "location of foam was in bottle before and in glass afterwards", "volume of bottle was empty before and full afterwards", "container of bottle was holding a glass before and holding a glass afterwards", "fullness of glass was empty before and full afterwards", "location of beer was in bottle before and in glass afterwards", "cleanness of glass was clean before and dirty afterwards", "location of container of beer can was in the cupboard before and on the table afterwards."]}
{"id": "Remove gum from the bottom of a shoe|1", "answers": ["location of bag was outside of plastic bag before and inside plastic bag afterwards", "location of shoe was on counter before and in plastic bag afterwards", "position of plastic bag was empty before and now holding shoe afterwards", "location of shoe was outside of plastic bag before and inside plastic bag afterwards", "container of plastic bag was empty before and full afterwards", "fullness of plastic bag was empty before and partially full afterwards", "weight of plastic bag was light before and heavy afterwards", "weight of bag was light before and heavy afterwards", "moisture of inside was dry before and wet afterwards."]}
{"id": "Remove gum from the bottom of a shoe|2", "answers": ["location of plastic bag was outside of bag before and inside of bag afterwards", "pressure of plastic bag was loose before and compressed afterwards", "location of plastic bag was in front of shoe before and behind shoe afterwards", "position of plastic bag was free before and pinned afterwards", "location of shoe was on table before and in bag afterwards", "state of plastic bag was open before and closed afterwards", "volume of plastic bag was empty before and full afterwards", "location of shoe skin was on the foot before and off the foot afterwards", "pressure of bag was loose before and compressed afterwards", "pressure of plastic bag was free before and pressed against gum afterwards."]}
{"id": "Remove gum from the bottom of a shoe|3", "answers": ["temperature of plastic bag was room temperature before and cold afterwards", "location of bag was out of freezer before and in freezer afterwards", "weight of plastic bag was lighter before and heavier afterwards", "temperature of shoe was room temperature before and cold afterwards", "location of bag was on counter before and in freezer afterwards", "location of shoe bag was outside of freezer before and inside freezer afterwards", "fullness of freezer was less full before and more full afterwards", "temperature of bag was warm before and cold afterwards."]}
{"id": "Remove gum from the bottom of a shoe|4", "answers": ["wetness of shoe was dry before and wet afterwards", "temperature of plastic bag was room temperature before and cold afterwards", "location of shoe was outside bag before and inside bag afterwards", "volume of bag was empty before and full afterwards", "temperature of bag was room temperature before and cold afterwards."]}
{"id": "Remove gum from the bottom of a shoe|5", "answers": ["location of shoe was in freezer before and out of freezer afterwards", "state of bagged shoe was stuck to the metal before and removed from the metal afterwards", "time of the time was earlier before and later afterwards", "location of shoe bagged shoe was in freezer before and in hand afterwards", "weight of the bagged shoe was heavier before and lighter afterwards", "state of bagged shoe was stuck before and removed afterwards", "state of the bagged shoe was wet before and dry afterwards", "location of shoe bag was in the freezer before and out of the freezer afterwards."]}
{"id": "Remove gum from the bottom of a shoe|6", "answers": ["location of shoe was in bag before and in trash afterwards", "location of bagged shoe was in freezer before and out of freezer afterwards", "fullness of plastic bag was more full before and less full afterwards", "temperature of bagged shoe was room temperature before and cold afterwards", "location of shoe was in plastic bag before and out of plastic bag afterwards", "location of bagged shoe was on counter before and in trash afterwards."]}
{"id": "Make sushi|1", "answers": ["orientation of dial was on counter before and is turned to off afterwards", "state of rice cooker was on before and off afterwards", "state of rice cooker was off before and on afterwards", "temperature of rice cooker was cool before and hot afterwards", "power of stove was off before and on afterwards", "temperature of rice cooker was room temperature before and hot afterwards", "temperature of rice cooker was cold before and hot afterwards", "electric conductivity of stovetop was turned off before and turned on afterwards."]}
{"id": "Make sushi|2", "answers": ["weight of rice cooker was lighter before and heavier afterwards", "location of rice was in a package before and in the rice cooker afterwards", "fullness of rice cooker was emptier before and fuller afterwards", "location of rice cooker lid was on before and off afterwards", "location of lid was off rice cooker before and on rice cooker afterwards", "weight of rice cooker was light before and heavier afterwards", "moisture of rice cooker was dry before and wet afterwards", "state of rice cooker was off before and on afterwards", "location of lid was on the counter before and on the rice cooker afterwards."]}
{"id": "Make sushi|3", "answers": ["temperature of rice cooker was cool before and hot afterwards", "state of timer was off before and on afterwards", "power of timer was off before and on afterwards", "texture of rice was hard before and soft afterwards", "temperature of rice cooker was cold before and hot afterwards", "temperature of stove burner was cold before and hot afterwards", "color of rice was pale before and brown afterwards", "temperature of rice cooker was cool before and hot afterwards", "location of timer was absent before and in the pot afterwards", "state of timer was off before and on afterwards."]}
{"id": "Make sushi|4", "answers": ["state of rice was in the pot before and on the plate afterwards", "moisture of rice was wet before and dry afterwards", "location of rice was in the bowl before and on the plate afterwards", "temperature of rice was hot before and cooler afterwards", "state of plate was uncovered before and covered afterwards", "weight of rice cooker was lighter before and heavier afterwards", "temperature of rice was cool before and hot afterwards", "texture of rice was soft before and firm afterwards."]}
{"id": "Make sushi|5", "answers": ["state of rice was raw before and cooked afterwards", "weight of the rice was heavier before and lighter afterwards", "location of fish was in bowl before and on rice afterwards", "cleanness of fork was clean before and dirty afterwards", "location of fish was outside of pan before and on rice afterwards", "temperature of the rice was cooler before and warmer afterwards", "temperature of fish was raw before and cooked afterwards", "cleanness of spoon was clean before and dirty afterwards", "location of the rice was in a bowl before and on the plate afterwards", "taste of rice was plain before and seasoned afterwards", "composition of rice was whole before and cooked afterwards", "cleanness of the plate was cleaner before and dirtier afterwards."]}
{"id": "Make sushi|6", "answers": ["location of wasabi was in package before and in pan afterwards", "location of soy sauce was in container before and added to rice afterwards", "location of wasabi was in package before and on rice afterwards", "taste of rice was plain before and soy sauce flavored afterwards", "temperature of rice was cool before and hot afterwards", "location of wasabi was in package before and on rice afterwards", "odor of rice was plain smelling before and spicy smelling afterwards."]}
{"id": "Make sushi|7", "answers": ["location of sushi was in a bowl before and on a plate afterwards", "location of rice was in pan before and on plate afterwards", "emptiness of plate was empty before and full afterwards", "cleanness of plate was clean before and dirty afterwards", "state of plate was empty before and full afterwards", "location of rice was in pan before and on plate afterwards", "location of wasabi was in pan before and on plate afterwards", "taste of rice was plain before and sauced afterwards."]}
{"id": "Make a chicken sandwich|1", "answers": ["cleanness of knife was clean before and dirty afterwards", "location of chicken was in the fridge before and on the counter afterwards", "temperature of chicken was room temperature before and cold afterwards", "location of chicken was in fridge before and in pan afterwards", "location of raw chicken was at store before and at home afterwards", "weight of pan was lighter before and heavier afterwards", "volume of fridge was full before and empty afterwards", "location of chicken was outside of pan before and inside pan afterwards", "ownership of chicken was owned by the store before and owned by the shopper afterwards."]}
{"id": "Make a chicken sandwich|2", "answers": ["state of the water was boiling before and now starting to simmer afterwards", "power of stove was off before and on afterwards", "state of water was hot before and cooling afterwards", "temperature of water was hot before and cooler afterwards", "wetness of chicken was dry before and wet afterwards", "temperature of water was boiling before and hot afterwards", "temperature of pan was cool before and hot afterwards", "wetness of pan was dry before and wet afterwards", "state of water was raw before and cooked afterwards", "temperature of water was boiling before and cooling afterwards."]}
{"id": "Make a chicken sandwich|3", "answers": ["fullness of pan was less full before and more full afterwards", "state of water was boiling before and simmering afterwards", "temperature of chicken was raw before and hot afterwards", "location of chicken was in cooler before and in hot water afterwards", "location of water was in bottle before and inside pot afterwards", "temperature of water was boiling before and boiling afterwards", "cleanness of pot was clean before and dirty afterwards", "temperature of water was cooler before and hot afterwards", "color of water was clear before and brown afterwards", "wetness of water was dry before and wet afterwards", "temperature of water was cold before and hot afterwards", "temperature of chicken was raw before and boiled afterwards."]}
{"id": "Make a chicken sandwich|4", "answers": ["cooked status of pan was empty before and full afterwards", "location of chicken was inside hot water before and outside water afterwards", "temperature of pan was cold before and hot afterwards", "location of water was inside water dish before and inside water afterwards", "container of pan was empty before and full afterwards", "temperature of water was cold before and boiling afterwards", "cleanness of chicken was dirty before and clean afterwards", "location of chicken was in stove before and out of stove afterwards", "fullness of pan was empty before and fuller afterwards."]}
{"id": "Make a chicken sandwich|5", "answers": ["organization of bread was on counter before and taken out afterwards", "temperature of bread was cool before and hot afterwards", "location of bread was in package before and on counter afterwards."]}
{"id": "Make a chicken sandwich|6", "answers": ["odor of bread was normal smelling before and odiferous afterwards", "location of mayo was in container before and on mixture afterwards", "taste of bread was plain before and seasoned afterwards", "weight of mayo jar was heavier before and lighter afterwards", "location of mayo was in the jar before and on the bread afterwards", "location of lettuce was missing from mixture before and in mixture afterwards", "taste of bread was bare before and mayo flavored afterwards", "weight of mayo jar was heavier before and lighter afterwards", "taste of bread was plain before and mayo flavored afterwards", "fullness of mayo jar was more full before and less full afterwards."]}
{"id": "Make a chicken sandwich|7", "answers": ["organization of chicken was whole before and sliced afterwards", "texture of chicken was hard before and soft afterwards", "location of mayo was in can before and on bread afterwards", "taste of chicken was plain before and sauced afterwards", "cleanness of cutting board was clean before and dirty afterwards", "odor of chicken was bland smelling before and fresh tasty smelling afterwards", "moisture of knife was dry before and wet afterwards", "cleanness of knife was clean before and dirty afterwards."]}
{"id": "Make a chicken sandwich|8", "answers": ["location of chicken was in the box before and in a serving dish afterwards", "temperature of bread was cold before and hot afterwards", "temperature of chicken was cool before and hot afterwards", "location of chicken was in pan before and on plate afterwards."]}
{"id": "Make a delux chicken sandwich|1", "answers": ["location of chicken was in the fridge before and in the bowl afterwards", "location of chicken was on counter before and in bowl afterwards", "ownership of chicken was at store before and purchased afterwards", "shape of chicken was raw before and cooked afterwards", "location of chicken was in package before and in bowl afterwards", "location of chicken was at store before and at home afterwards", "cooked or not of chicken was raw before and cooked afterwards", "moisture of chicken was dry before and wet afterwards", "cleanness of bowl was clean before and dirty afterwards", "location of chicken was at store before and at home afterwards."]}
{"id": "Make a delux chicken sandwich|2", "answers": ["state of water was cold before and boiling afterwards", "volume of strainer was full before and empty afterwards", "state of water faucet was off before and on afterwards", "electric conductivity of stove burner was off before and on afterwards", "volume of water volume was greater before and lesser afterwards", "temperature of water was cold before and boiling afterwards", "state of chicken was raw before and cooked afterwards", "temperature of water was cooler before and hotter afterwards", "temperature of pan was cooler before and hot afterwards", "temperature of water was cold before and hot afterwards", "temperature of chicken was cold before and hot afterwards", "wetness of chicken was dry before and wet afterwards", "wetness of water was drier before and wetter afterwards", "temperature of water was cold before and hot afterwards."]}
{"id": "Make a delux chicken sandwich|3", "answers": ["location of hot water was outside water before and inside water afterwards", "temperature of chicken was cold before and hot afterwards", "state of water faucet was off before and on afterwards", "electric conductivity of stove burner was off before and on afterwards", "temperature of water was cooler before and hotter afterwards", "wetness of chicken was dry before and wet afterwards", "temperature of water was room temperature before and boiling afterwards", "temperature of chicken was cool before and hot afterwards", "volume of water volume was greater before and lesser afterwards", "temperature of water was cooler before and hot afterwards", "location of chicken was outside water before and inside water afterwards", "temperature of pan was cold before and hot afterwards", "temperature of water was cool before and hot afterwards", "state of stove was off before and on afterwards."]}
{"id": "Make a delux chicken sandwich|4", "answers": ["location of chicken was outside hot water before and inside hot water afterwards", "location of chicken was outside water before and inside water afterwards", "cooked or not of chicken was raw before and cooked afterwards", "moisture of chicken was dry before and wet afterwards", "fullness of pan was emptier before and fuller afterwards", "taste of water was plain before and flavored afterwards", "temperature of water was boiling before and hot afterwards", "temperature of chicken was raw before and cooked afterwards", "cleanness of chicken was dirty before and clean afterwards", "color of water was clear before and colored afterwards."]}
{"id": "Make a delux chicken sandwich|5", "answers": ["location of pan was on stove before and off stove afterwards", "temperature of pan was cool before and hot afterwards", "temperature of pan was cold before and hot afterwards", "temperature of pan was cold before and hot afterwards", "time of time was day before and after pan was boiling afterwards", "state of pan was cool before and hot afterwards", "temperature of chicken was cool before and hot afterwards", "temperature of pan was cool before and hot afterwards", "temperature of pan was cool before and hot afterwards."]}
{"id": "Make a delux chicken sandwich|6", "answers": ["state of pan was empty before and full afterwards", "temperature of bacon was cool before and hot afterwards", "location of pan was outside of pan before and inside pan afterwards", "weight of pan was lighter before and heavier afterwards", "location of bacon was outside of pan before and inside pan afterwards", "fullness of pan was empty before and full afterwards", "temperature of pan was cool before and hot afterwards."]}
{"id": "Make a delux chicken sandwich|7", "answers": ["texture of bacon was firm before and soft afterwards", "location of bacon was on stove before and in pan afterwards", "texture of meat was solid before and soft afterwards", "state of meat was raw before and cooked afterwards", "temperature of bacon was cool before and hot afterwards", "location of pan was on stove top before and on counter afterwards", "temperature of bacon was cold before and hot afterwards", "state of pan was off before and on afterwards."]}
{"id": "Make a delux chicken sandwich|8", "answers": ["location of bacon was on stove before and in pan afterwards", "location of the bacon was on the counter before and in the pan afterwards", "location of meat was on counter before and in pan afterwards", "temperature of bacon was cool before and hot afterwards", "temperature of pan was cool before and hot afterwards."]}
{"id": "Make a delux chicken sandwich|9", "answers": ["location of bread was in package before and on counter afterwards", "location of bread was in package before and on counter afterwards", "texture of bread was firm before and soft afterwards."]}
{"id": "Make a delux chicken sandwich|10", "answers": ["location of mayo was in container before and on bread afterwards", "composition of lettuce was whole before and cut up afterwards", "odor of bread was bland smelling before and tasty smelling afterwards", "location of mayo was in a jar before and on the bread afterwards", "taste of bread was plain before and mayo flavored afterwards", "location of mayo was in jar before and on bread afterwards."]}
{"id": "Make a delux chicken sandwich|11", "answers": ["cleanness of pan was clean before and dirty afterwards", "location of mayo was in container before and in mixture afterwards", "location of bacon was on counter before and on bread afterwards", "location of mayo was in container before and in bread afterwards", "taste of bread was bare before and cooked afterwards", "weight of plate was lighter before and heavier afterwards", "location of bacon was on counter before and on bread afterwards", "weight of plate was lighter before and heavier afterwards."]}
{"id": "Make a delux chicken sandwich|12", "answers": ["location of mayo was in container before and on bread afterwards", "taste of chicken was braed before and fried afterwards", "temperature of chicken was cooler before and hotter afterwards", "composition of chicken was meatless before and meatloaf afterwards", "shape of chicken was in chunk before and sliced afterwards", "cleanness of cutting board was clean before and dirty afterwards", "texture of knife was smooth before and sticky afterwards", "weight of chicken was heavier before and lighter afterwards", "volume of pot was full before and empty afterwards", "texture of meat was firm before and soft afterwards", "cleanness of knife was clean before and dirty afterwards."]}
{"id": "Make a delux chicken sandwich|13", "answers": ["volume of pot was full before and empty afterwards", "state of chicken was hot before and cooled afterwards", "location of chicken was in pot before and in bowl afterwards", "taste of soup was lacking chicken flavor before and infused with chicken flavor afterwards", "weight of pot was heavier before and lighter afterwards", "location of chicken was on stove before and in serving bowl afterwards", "weight of serving plate was lighter before and heavier afterwards."]}
{"id": "Make a southern fav dish - chicken waffle|1", "answers": ["location of chicken was in package before and in pan afterwards", "ownership of chicken was available for purchase before and purchased afterwards", "volume of pan was empty before and full afterwards", "location of chicken was at store before and at home afterwards", "location of can of chicken was at store before and purchased afterwards."]}
{"id": "Make a southern fav dish - chicken waffle|2", "answers": ["state of water was boiling before and boiling afterwards", "wetness of pan was dry before and wet afterwards", "state of stove was off before and on afterwards", "temperature of water was hot before and cool afterwards", "wetness of chicken was dry before and wet afterwards", "location of water was in faucet before and in pot afterwards", "temperature of water was hot before and cooling down afterwards", "temperature of water was hot before and cooler afterwards", "moisture of pot was dry before and wet afterwards."]}
{"id": "Make a southern fav dish - chicken waffle|3", "answers": ["container of hot water was in faucet before and in pan afterwards", "wetness of chicken was dry before and wet afterwards", "location of chicken was outside water before and inside water afterwards", "temperature of chicken was raw before and cooked afterwards", "temperature of pan was cool before and hot afterwards", "temperature of stove was cold before and hot afterwards", "volume of water volume in kettle was greater before and lesser afterwards", "state of water was cool before and boiled afterwards", "fullness of pan was emptier before and fuller afterwards", "temperature of water was cold before and hotter afterwards", "temperature of water was boiling before and hot afterwards", "location of chicken was outside water before and inside water afterwards."]}
{"id": "Make a southern fav dish - chicken waffle|4", "answers": ["location of chicken was inside hot water before and outside hot water afterwards", "location of chicken was in pan before and in pot afterwards", "temperature of chicken was cool before and hot afterwards", "volume of pan was full before and empty afterwards", "state of chicken was raw before and cooked afterwards", "temperature of pan was cold before and hot afterwards", "state of stove was off before and on afterwards."]}
{"id": "Make a southern fav dish - chicken waffle|5", "answers": ["location of chicken was in pan before and outside pan afterwards", "temperature of waffle was cold before and hot afterwards", "state of mixed chicken was raw before and cooked afterwards", "temperature of chicken was cold before and hot afterwards", "location of waffle was in its place before and in chicken afterwards", "weight of pan was lighter before and heavier afterwards", "texture of chicken was hard before and soft afterwards."]}
{"id": "Make a southern fav dish - chicken waffle|6", "answers": ["color of water was clear before and garnished afterwards", "temperature of water was boiling before and cooling afterwards", "location of waffle was in storage before and in use afterwards", "wetness of waffle was dry before and wet afterwards", "location of strawberry jelly was in container before and on waffle afterwards", "location of waffle was in kitchen before and at home afterwards."]}
{"id": "Make a southern fav dish - chicken waffle|7", "answers": ["location of maple syrup was in bottle before and on waffle afterwards", "location of maple syrup bottle was in the pantry before and on the table afterwards", "taste of waffle was bare before and decorated afterwards", "taste of waffle was without maple syrup before and now with maple syrup afterwards", "temperature of maple syrup was cold before and hot afterwards", "location of maple syrup was in bottle before and on waffle afterwards."]}
{"id": "Make a southern fav dish - chicken waffle|8", "answers": ["moisture of cutting board was dry before and wet afterwards", "texture of chicken was harder before and softer afterwards", "cleanness of knife was clean before and dirty afterwards", "location of chicken was in bowl before and on waffle afterwards", "moisture of cutting board was dry before and wet afterwards", "location of chicken was on counter before and on waffle afterwards", "shape of chicken was intact before and sliced afterwards", "weight of bowl was heavier before and lighter afterwards", "location of chicken was in bowl before and outside bowl afterwards", "location of knife was in drawer before and on counter afterwards", "size of chicken was whole before and sliced afterwards."]}
{"id": "Make a southern fav dish - chicken waffle|9", "answers": ["location of chicken was on counter before and in bowl afterwards", "location of chicken was in the middle before and on waffle afterwards", "weight of plate was lighter before and heavier afterwards", "state of waffle was full before and empty afterwards", "location of chicken was in the middle before and on waffle afterwards", "cleanness of plate was clean before and dirty afterwards", "volume of plate was empty before and full afterwards."]}
{"id": "Send a mail to a friend|1", "answers": ["pressure of grip was loose before and tight afterwards", "location of paper was on table before and in hand afterwards", "container of paper was in hand before and out of hand afterwards", "volume of container was full before and empty afterwards", "weight of paper was heavier before and lighter afterwards", "location of paper was in package before and on table afterwards."]}
{"id": "Send a mail to a friend|2", "answers": ["state of the paper was carrying a pen before and now picked up afterwards", "location of pen was on the table before and in the hand afterwards", "location of pen was down before and up afterwards", "pressure of hand was relaxed before and squeezing afterwards", "wetness of hand was dry before and wet afterwards."]}
{"id": "Send a mail to a friend|3", "answers": ["location of pen was on the table before and in your hand afterwards", "appearance of paper was blank before and decorated afterwards", "state of letter was on the table before and in hand afterwards", "appearance of paper was blank before and decorated afterwards", "volume of hand was empty before and holding pen afterwards."]}
{"id": "Send a mail to a friend|4", "answers": ["state of paper was unfolded before and folded afterwards", "location of pen was in hand before and in envelope afterwards", "shape of paper was flat before and folded afterwards", "state of letter was in envelope before and removed afterwards", "location of paper was on table before and in hand afterwards", "letters of contact person was outside of paper before and inside of paper afterwards", "contents of envelope was empty before and filled with paper afterwards", "state of paper was whole before and folded afterwards."]}
{"id": "Send a mail to a friend|5", "answers": ["state of envelope was empty before and filled afterwards", "location of stamp was outside of envelope before and inside envelope afterwards", "weight of envelope was light before and heavier afterwards", "location of paper was in package before and on table afterwards", "state of letter was unopened before and opened afterwards", "state of letter was unshaped before and shaped afterwards", "shape of paper was flat before and shaped afterwards", "composition of paper was flat before and folded afterwards"]}
{"id": "Send a mail to a friend|6", "answers": ["There will be no change."]}
{"id": "Send a mail to a friend|7", "answers": ["location of envelope was in hand before and in mailbox afterwards", "volume of hand was full before and empty afterwards", "location of letter was in the mailbox before and in a different mailbox afterwards", "weight of mailbox was lighter before and heavier afterwards", "weight of mailbox was light before and heavier afterwards", "location of friend's information was in the envelope before and on the paper afterwards."]}
{"id": "Wrap a present for Christmas.|1", "answers": ["location of wrapping paper was in package before and in hands afterwards", "state of the wrapping paper was empty before and now full of wrapping paper afterwards", "location of wrapping paper was in a package before and on your desk afterwards", "location of wrapping paper was in storage before and on your desk afterwards", "weight of the wrapping paper was lighter before and heavier afterwards"]}
{"id": "Wrap a present for Christmas.|2", "answers": ["location of wrapping paper was in package before and in center of box afterwards", "weight of envelope was lighter before and heavier afterwards", "location of wrapping paper was in hand before and in the middle afterwards", "volume of box was empty before and full afterwards."]}
{"id": "Wrap a present for Christmas.|3", "answers": ["shape of measuring tape was rolled up before and flat afterwards", "length of measuring tape was closed before and open afterwards", "state of measuring tape was closed before and open afterwards."]}
{"id": "Wrap a present for Christmas.|4", "answers": ["thickness of paper was flat before and creased afterwards."]}
{"id": "Wrap a present for Christmas.|5", "answers": ["shape of paper was flat before and folded afterwards", "shape of paper was flat before and creased afterwards", "state of paper was straight before and with a corner cut in the middle afterwards."]}
{"id": "Wrap a present for Christmas.|6", "answers": ["There will be no change."]}
{"id": "Wrap a present for Christmas.|7", "answers": ["There will be no change."]}
{"id": "Wrap a present for Christmas.|8", "answers": ["location of tea was in a bowl before and in the air afterwards", "location of ink was in pen before and on paper afterwards", "complexity of tea cup was uncovered before and covered afterwards"]}
{"id": "Make oven baked french fries.|1", "answers": ["temperature of oven was cool before and hot afterwards", "location of baking sheet was in box before and in oven afterwards", "temperature of oven was cold before and preheated afterwards", "power of oven was off before and on afterwards", "temperature of oven was cold before and hot afterwards", "location of baking sheet was in drawer before and in oven afterwards", "state of oven was off before and on afterwards", "state of oven was off before and on afterwards", "location of baking sheet was in a drawer before and in the oven afterwards", "temperature of oven was cool before and hot afterwards", "temperature of oven was cool before and hot afterwards", "location of baking sheet was in box before and in oven afterwards."]}
{"id": "Make oven baked french fries.|2", "answers": ["cleanness of knife was clean before and dirty afterwards", "fullness of cutting board was full before and empty afterwards", "cleanness of knife was clean before and dirty afterwards", "texture of cutting board was smooth before and sticky afterwards", "cleanness of knife was clean before and dirty afterwards", "location of potato was on the cutting board before and in the pan afterwards", "weight of baking sheet was lighter before and heavier afterwards", "cleanness of cutting board was clean before and dirty afterwards."]}
{"id": "Make oven baked french fries.|3", "answers": ["cleanness of cutting board was clean before and dirty afterwards", "fullness of cutting board was empty before and full afterwards", "cleanness of cutting board was clean before and dirty afterwards", "cleanness of knife was clean before and dirty afterwards", "state of potato was whole before and cut into strips afterwards", "moisture of knife was dry before and wet afterwards", "cleanness of potatoes were dirty before and washed afterwards", "location of knife was in the drawer before and on the table afterwards", "sound of kitchen was quiet before and loud afterwards", "texture of knife blade was smooth before and sticky afterwards"]}
{"id": "Make oven baked french fries.|4", "answers": ["location of oil was in a bottle before and in the pan afterwards", "weight of oil bottle was heavier before and lighter afterwards", "cleanness of frying pan was clean before and dirty afterwards", "taste of oil was plain before and salted afterwards", "temperature of oil was cool before and hot afterwards", "temperature of potato was cool before and hot afterwards", "composition of french fry was whole before and cut up afterwards", "volume of pan was empty before and fuller afterwards", "temperature of oil was cold before and hot afterwards", "weight of frying pan was lighter before and heavier afterwards", "cleanness of plate was clean before and dirty afterwards", "temperature of pan was cool before and hot afterwards", "location of olive oil was in a bottle before and on the potatoes afterwards", "moisture of salt was dry before and oily afterwards"]}
{"id": "Make oven baked french fries.|5", "answers": ["location of plate was on the counter before and on the table afterwards", "location of hot sheet was on the counter before and in the oven afterwards", "cleanness of plate was clean before and dirty afterwards", "temperature of pan was hot before and cool afterwards", "temperature of frying pan was hot before and cool afterwards", "state of hot sheet was empty before and full afterwards", "weight of plate was lighter before and heavier afterwards", "container of plate was empty before and holding the french fry afterwards", "cleanness of plate was clean before and dirty afterwards", "temperature of frying pan was hot before and cooling afterwards", "temperature of sheet was hot before and cooling afterwards"]}
{"id": "Make oven baked french fries.|6", "answers": ["power of oven was off before and on afterwards", "temperature of frying pan was cool before and hot afterwards", "temperature of exterior was cold before and hot afterwards", "temperature of oil was cold before and hot afterwards", "texture of french fry was raw before and tender afterwards", "state of potato was raw before and cooked afterwards", "fullness of oven was empty before and fuller afterwards", "temperature of oil was cold before and hot afterwards", "container of oven was empty before and full afterwards", "time of the timer was off before and on afterwards", "state of fry was raw before and cooked afterwards."]}
{"id": "Make oven baked french fries.|7", "answers": ["location of brownie batter was in the pan before and on the ham afterwards", "power of oven was off before and on afterwards", "temperature of ham was cold before and hot afterwards", "composition of french fryer was raw before and is baked afterwards", "temperature of grill was cool before and hot afterwards", "orientation of fork was vertical before and horizontal afterwards", "composition of french fryer was raw before and is fried afterwards."]}
{"id": "Make oven baked french fries.|8", "answers": ["temperature of oil was cool before and hot afterwards", "state of cheese was raw before and melted afterwards", "location of cheese was in fridge before and out of fridge afterwards", "power of oven was on before and off afterwards", "composition of food was raw before and cooked afterwards", "temperature of oven was hot before and cool afterwards", "state of fridge door was closed before and open afterwards", "texture of cheese was solid before and soft afterwards", "state of refridgerator was heating before and cooling afterwards", "temperature of frying pan was cool before and hot afterwards", "location of plate was in the cabinet before and on the table afterwards"]}
{"id": "Play with a cat at a friend's house|1", "answers": ["location of house was far before and near afterwards", "state of house was deserted before and entered afterwards", "action of person was waiting before and going afterwards."]}
{"id": "Play with a cat at a friend's house|2", "answers": ["knowledge of location of cat was unknown before and located afterwards", "state of your character was looking for the cat before and finding the cat afterwards", "location of cat was in friend's house before and at the house afterwards."]}
{"id": "Play with a cat at a friend's house|3", "answers": ["state of the fur was starting to lose its coat before and is starting to lose its coat afterwards", "state of cat was being petrified before and being pat afterwards", "location of cat was at home before and on a street afterwards", "location of the cat was elsewhere before and on the street afterwards."]}
{"id": "Play with a cat at a friend's house|4", "answers": ["cleanness of plate was clean before and full of food afterwards", "state of cat was hungry before and full afterwards", "hunger of cat was hungry before and full afterwards", "location of food was in the fridge before and on the plate afterwards", "location of plate was in the cupboard before and on the table afterwards."]}
{"id": "Play with a cat at a friend's house|5", "answers": ["state of cat was hungry before and full afterwards", "activity of cat was inactive before and active afterwards", "state of cat was hungry before and full afterwards", "hunger of cat was hungry before and satiated afterwards."]}
{"id": "Play with a cat at a friend's house|6", "answers": ["location of the cat was on the floor before and out of the room afterwards", "location of cat was in the open before and in a bag afterwards."]}
{"id": "Play league of legends with online friends|1", "answers": ["location of cellphone was in the house before and in the bag afterwards", "location of the cellphone was elsewhere before and in the hand afterwards", "location of cellphone was on the table before and in the bag afterwards", "location of cellphone was outside the house before and inside the house afterwards", "ownership of cellphone was owned by the store before and owned by the shopper afterwards."]}
{"id": "Play league of legends with online friends|2", "answers": ["functionality of phone was shut off before and on afterwards", "state of phone was logged off before and logged on afterwards", "state of god of war was loading before and loading afterwards", "availability of login was missing before and present afterwards", "state of internet connection was unavailable before and available afterwards", "state of game was off before and on afterwards", "state of game was logged off before and logged on afterwards", "event of alliance was undefeated before and defeated afterwards", "state of god mode was off before and on afterwards", "location of person was inside the house before and outside the house afterwards."]}
{"id": "Play league of legends with online friends|3", "answers": ["state of channel was logged out before and logged in afterwards", "state of game was on before and on afterwards", "state of the chat was off before and on afterwards", "state of diva was logged off before and logged on afterwards", "location of player was offline before and in the discord channel afterwards."]}
{"id": "Play league of legends with online friends|4", "answers": ["state of event was unperformed before and performed afterwards", "state of channel was unselected before and selected afterwards", "state of channel was unselected before and selected afterwards."]}
{"id": "Play league of legends with online friends|5", "answers": ["state of back was normal before and powered up afterwards", "location of back button was touching air before and away from air afterwards", "state of the phone was idle before and being used afterwards", "power of back button was off before and on afterwards."]}
{"id": "Play league of legends with online friends|6", "answers": ["state of game lobby was unloaded before and loaded afterwards", "state of game lobby was idle before and started afterwards", "state of game lobby was off before and on afterwards."]}
{"id": "Play league of legends with online friends|7", "answers": ["state of game lobby was uninvited before and invited afterwards", "state of lobby was empty before and occupied afterwards."]}
{"id": "Play league of legends with online friends|8", "answers": ["state of game was unentered before and entered afterwards", "step of matching queue was unreached before and entered afterwards", "state of person was waiting before and playing afterwards."]}
{"id": "Play league of legends with online friends|9", "answers": ["state of game was unplayed before and played afterwards", "state of game was ongoing before and over afterwards", "state of game was unplayed before and beaten afterwards", "state of ladder was unbeaten before and beaten afterwards", "power of game was off before and on afterwards."]}
{"id": "Take a vacation to Iceland|1", "answers": ["knowledge of route was unplanned before and planned afterwards", "knowledge of route was indeterminate before and determined afterwards", "knowledge of cost was indeterminate before and determined afterwards", "knowledge of cost was indeterminate before and determined afterwards."]}
{"id": "Take a vacation to Iceland|2", "answers": ["object of vacation was unchosen before and chosen afterwards", "status of vacation approval was absent before and present afterwards", "state of meeting with manager was absent before and held afterwards", "state of vacation was unstarted before and in progress afterwards", "knowledge of permission to go to Iceland was withheld before and given afterwards", "location of airport was absent before and present afterwards", "availability of vacation planning permission was withheld before and given afterwards."]}
{"id": "Take a vacation to Iceland|3", "answers": ["accessibility of airline ticket sales agent was unnoticed before and noticed afterwards", "ownership of book was absent before and purchased afterwards", "location of ticket office was absent before and present afterwards", "purchase of ticket was unpurchased before and purchased afterwards", "ownership of airline ticket sales receipt was absent before and present afterwards", "knowledge of knowledge of what to book was missing before and present afterwards"]}
{"id": "Take a vacation to Iceland|4", "answers": ["location of map was in the bag before and on the table afterwards", "ownership of book was property of the store before and property of the shopper afterwards", "location of money was in the wallet before and in the cash register afterwards", "ownership of ticket agent was the property of the store before and the property of the shopper afterwards."]}
{"id": "Take a vacation to Iceland|5", "answers": ["location of person was at home before and in Iceland afterwards", "state of account was closed before and open afterwards", "location of luggage was at home before and on a plane afterwards", "cost of ticket was unpurchased before and purchased afterwards", "weight of bag was heavy before and light afterwards", "location of luggage was at home before and at the airport afterwards."]}
{"id": "Take a vacation to Iceland|6", "answers": ["cost of car was for sale before and bought afterwards", "electric conductivity of car was turned off before and turned on afterwards", "electric conductivity of bus was turned off before and turned on afterwards", "location of person was home before and outside afterwards", "location of car was at home before and at the hotels afterwards", "location of electric car was at home before and in hotel afterwards", "electric conductivity of car was unplugged before and plugged in afterwards", "electric conductivity of train was turned off before and turned on afterwards."]}
{"id": "Take a vacation to Iceland|7", "answers": ["movement of person was stationary before and moving afterwards"]}
{"id": "Plan for a 3-day trip in Rome|1", "answers": ["state of search engine was dormant before and running afterwards", "activity of computer was idle before and processing new web activity afterwards"]}
{"id": "Plan for a 3-day trip in Rome|2", "answers": ["knowledge of tour schedule was unknown before and known afterwards", "state of list of papazza was closed before and open afterwards", "location of list of papazza was absent before and present afterwards", "location of activity was unplanned before and planned afterwards", "knowledge of travel schedule was unknown before and known afterwards"]}
{"id": "Plan for a 3-day trip in Rome|3", "answers": ["state of book was unavailable before and purchased afterwards", "volume of bag was empty before and full afterwards", "knowledge of location was unselected before and selected afterwards", "location of money was in purse before and in hotel register afterwards."]}
{"id": "Plan for a 3-day trip in Rome|4", "answers": ["electric conductivity of phone was off before and on afterwards", "state of information was absent before and present afterwards", "electric conductivity of computer was turned off before and turned on afterwards"]}
{"id": "Plan for a 3-day trip in Rome|5", "answers": ["state of credit was uncharged before and charged afterwards", "location of hotel was in open before and selected afterwards", "location of book was at the hotel before and at home afterwards", "state of menu was unchecked before and checked afterwards", "ownership of book was owned by hotel before and bought by you afterwards"]}
{"id": "Subscribe to Amazon Prime|1", "answers": ["state of www was unlocated before and located afterwards", "availability of google was absent before and present afterwards", "availability of pmazon site was unavailable before and available afterwards", "state of product pages was unfound before and found afterwards", "electric conductivity of pmx was turned off before and turned on afterwards", "location of pmazon website was absent before and present afterwards", "electric conductivity of computer was turned off before and turned on afterwards."]}
{"id": "Subscribe to Amazon Prime|2", "answers": ["step of account was unmade before and created afterwards", "state of password was non-existent before and created afterwards", "state of account was empty before and created afterwards", "state of password was non-existent before and created afterwards."]}
{"id": "Subscribe to Amazon Prime|3", "answers": ["state of product search engine was unopened before and opened afterwards", "state of product name was trending before and entered afterwards", "step of \"prime membership\" was unfound before and found afterwards", "color of page was blank before and searched afterwards", "state of search bar was empty before and filled with shoppers before and filled with shoppers afterwards."]}
{"id": "Subscribe to Amazon Prime|4", "answers": ["state of webpage was unclicked before and clicked afterwards", "step of application for membership was at http://www before and at www afterwards", "availability of membership was missing before and found afterwards", "state of page was being browsed before and loading afterwards", "state of browser was on login page before and on membership page afterwards."]}
{"id": "Subscribe to Amazon Prime|5", "answers": ["occupation of account was empty before and filled out afterwards", "step of personal information was unfilled before and filled out afterwards", "step of credit card information was unfilled before and filled out afterwards", "fullness of credit card information bucket was full before and emptier afterwards."]}
{"id": "Subscribe to Amazon Prime|6", "answers": ["step of finalization was unclicked before and clicked afterwards", "state of confirm button was missing before and present afterwards", "state of credit card information was unconfirmed before and confirmed afterwards", "step of finalization was unclicked before and clicked afterwards", "availability of confirm button was missing before and present afterwards", "state of credit card information was unconfirmed before and confirmed afterwards."]}
{"id": "Install Python on a computer|1", "answers": ["knowledge of definition of pseud was unknown before and known afterwards", "state of documentation was unread before and read afterwards", "state of documentation was absent before and found afterwards", "state of google was searched before and in once place afterwards", "electric conductivity of computer was turned off before and turned on afterwards", "state of google was searched before and found afterwards."]}
{"id": "Install Python on a computer|2", "answers": ["state of the download was unistalled before and installed afterwards", "state of computer was off before and on afterwards", "state of updated software was uninstalled before and installed afterwards", "electric conductivity of computer was turned off before and turned on afterwards", "step of python was missing for the current machine before and downloaded for the current machine afterwards", "location of software was online before and in device afterwards", "electric conductivity of computer was turned off before and turned on afterwards", "state of hardware was uninstalled before and installed afterwards."]}
{"id": "Install Python on a computer|3", "answers": ["step of download was unclicked before and clicked afterwards", "state of download was clicked before and unclicked afterwards", "state of installer was clicked before and unclicked afterwards", "state of browser was on download page before and on download page afterwards."]}
{"id": "Install Python on a computer|4", "answers": ["state of next prompt was unseen before and visible afterwards", "step of next in prompt was unclicked before and clicked afterwards", "state of next button was unclicked before and clicked afterwards", "state of installation was unclicked before and clicked afterwards", "location of next button was on the top of the screen before and on the bottom of the screen afterwards."]}
{"id": "Install Python on a computer|5", "answers": ["state of next prompt was unseen before and visible afterwards", "step of installation was incomplete before and complete afterwards", "state of installation was still to complete before and complete afterwards", "step of next prompt was unclicked before and clicked afterwards."]}
{"id": "Install Python on a computer|6", "answers": ["state of click event was unstarted before and completed afterwards", "state of installation was incomplete before and complete afterwards", "step of finish was unclicked before and clicked afterwards", "state of download was in progress before and complete afterwards."]}
{"id": "Buy a large standing desk for an apartment|1", "answers": ["knowledge of it was unknown if the standing desk was a known existence before and a known existence afterwards", "knowledge of it was unknown if the standing desk was a known existence before and a known existence afterwards."]}
{"id": "Buy a large standing desk for an apartment|2", "answers": ["state of price was unclicked before and clicked afterwards", "knowledge of price was unselected before and selected afterwards", "state of option of measuring tape was unclicked before and clicked afterwards."]}
{"id": "Buy a large standing desk for an apartment|3", "answers": ["state of decision which desk to buy was unmade before and made afterwards", "knowledge of desk was undecided before and decided afterwards", "knowledge of price was undetermined before and determined afterwards."]}
{"id": "Buy a large standing desk for an apartment|4", "answers": ["ownership of decision on size was unmade before and made afterwards."]}
{"id": "Buy a large standing desk for an apartment|5", "answers": ["state of price was unselected before and selected afterwards", "knowledge of price was undecided before and decided afterwards", "cost of living costs of living was lower before and higher afterwards", "state of price was undecided before and decided afterwards."]}
{"id": "Buy a large standing desk for an apartment|6", "answers": ["state of webpage was unclicked before and clicked afterwards", "step of buying was unclicked before and clicked afterwards", "state of price was unselected before and selected afterwards"]}
{"id": "Buy a large standing desk for an apartment|7", "answers": ["step of personal information was unfilled before and filled out afterwards", "activity of credit card was dormant before and being used afterwards", "volume of credit card information account was empty before and full afterwards", "location of credit card was in wallet before and out of wallet afterwards."]}
{"id": "Buy a large standing desk for an apartment|8", "answers": ["step of purchase was unconfirmed before and confirmed afterwards", "volume of account was empty before and full afterwards", "state of credit card information was unconfirmed before and confirmed afterwards."]}
{"id": "Order takeout food from the best Indian restaurant in the city|1", "answers": ["knowledge of google was missing before and found afterwards", "location of the search bar was idle before and being used afterwards", "state of best indian restaurant was unchosen before and chosen afterwards."]}
{"id": "Order takeout food from the best Indian restaurant in the city|2", "answers": ["knowledge of website was unlocated before and located afterwards", "location of food was absent before and present afterwards", "knowledge of website was unlocated before and located afterwards."]}
{"id": "Order takeout food from the best Indian restaurant in the city|3", "answers": ["knowledge of menu was unseen before and seen afterwards", "state of menu was unclicked before and clicked afterwards", "location of menu was in google before and on india website afterwards."]}
{"id": "Order takeout food from the best Indian restaurant in the city|4", "answers": ["There will be no change."]}
{"id": "Order takeout food from the best Indian restaurant in the city|5", "answers": ["location of food was unselected before and selected afterwards", "step of order was unmade before and made afterwards", "state of menu was unclicked before and clicked afterwards", "state of button for menu was unclicked before and clicked afterwards."]}
{"id": "Order takeout food from the best Indian restaurant in the city|6", "answers": ["location of dish was unselected before and selected afterwards", "step of order page was unfollowed before and followed afterwards", "state of dish was unselected before and selected afterwards", "volume of menu was unfound before and found afterwards."]}
{"id": "Order takeout food from the best Indian restaurant in the city|7", "answers": ["state of credit card was non-existent before and filled out afterwards", "location of credit card was in wallet before and out of wallet afterwards", "volume of shopping cart was empty before and full afterwards", "step of food order was unclicked before and clicked afterwards", "weight of shopping cart was lighter before and heavier afterwards", "volume of credit card information was empty before and full afterwards", "fullness of credit card account was emptier before and fuller afterwards."]}
{"id": "Order takeout food from the best Indian restaurant in the city|8", "answers": ["location of credit card was in wallet before and out of wallet afterwards", "step of order was unfollowed before and followed afterwards", "volume of bank account was full before and empty afterwards", "state of confirm button was unclicked before and clicked afterwards", "action of person was clicking the confirm button before and continuing with the order afterwards", "state of credit card information was unconfirmed before and confirmed afterwards."]}
{"id": "Make bubble tea at home|1", "answers": ["location of brown sugar was at the store before and in the carton afterwards."]}
{"id": "Make bubble tea at home|2", "answers": ["location of milk was in carton before and in container afterwards", "location of milk was in the fridge before and in the carton afterwards", "weight of carton was heavier before and lighter afterwards", "fullness of carton was empty before and full afterwards", "state of carton was empty before and full afterwards", "location of milk was in the fridge before and in the container afterwards", "ownership of milk was available for purchase before and purchased afterwards."]}
{"id": "Make bubble tea at home|3", "answers": ["location of milk was in refrigerator before and in bowl afterwards", "fullness of bowl was emptier before and fuller afterwards", "cleanness of bowl was clean before and dirty afterwards", "moisture of mixing cup was dry before and wet afterwards", "location of milk was in fridge before and in bowl afterwards", "volume of mixing cup was empty before and fuller afterwards", "weight of bowl was lighter before and heavier afterwards", "volume of bowl was empty before and fuller afterwards", "location of milk was in carton before and in bowl afterwards."]}
{"id": "Make bubble tea at home|4", "answers": ["state of mix was emulsified before and liquid afterwards", "power of microwave was off before and on afterwards", "state of mixture was cool before and warm afterwards", "composition of chocolate was solid powder before and liquid afterwards", "composition of mixture was emulsified before and microwave afterwards"]}
{"id": "Make bubble tea at home|5", "answers": ["volume of cup was empty before and full afterwards", "cleanness of cup was clean before and dirty afterwards", "state of cup was empty before and full afterwards", "volume of cup was empty before and full afterwards", "temperature of the cup was cooler before and warmer afterwards", "wetness of the cup was dryer before and wetter afterwards", "location of cup was outside of cup before and inside cup afterwards", "weight of cup was lighter before and heavier afterwards."]}
{"id": "Make bubble tea at home|6", "answers": ["weight of the cup was lighter before and heavier afterwards", "volume of cup was empty before and full afterwards", "wetness of cup was dry before and wet afterwards", "location of milk was in the carton before and in the cup afterwards", "state of cup was empty before and full afterwards", "volume of carton was full before and empty afterwards", "temperature of cup was room temperature before and cold afterwards."]}
{"id": "Make bubble tea at home|7", "answers": ["wetness of cup was drier before and wetter afterwards", "location of milk was in the carton before and in the cup afterwards", "moisture of cup was dry before and wet afterwards", "location of milk was in the carton before and in the cup afterwards", "state of mixture was unformed before and mixed afterwards."]}
{"id": "\ufeffCook Basmati Brown Rice|1", "answers": ["temperature of soil was warm before and cool afterwards", "moisture of soil was dry before and wet afterwards", "composition of water was by itself before and mixed with soil afterwards", "moisture of salt was dry before and moist afterwards", "location of water was in the pipes before and in a bucket afterwards", "wetness of salt was dry before and wet afterwards", "readiness of water was unprepared before and prepared afterwards."]}
{"id": "\ufeffCook Basmati Brown Rice|2", "answers": ["moisture of salt was dry before and wet afterwards", "location of salt was in cupboard before and on counter afterwards", "volume of water volume was lower before and higher afterwards", "state of salt was unapplied before and applied afterwards", "composition of salt was separate before and mixed afterwards", "temperature of water was cool before and hot afterwards", "composition of salt was crystallized before and dissolved afterwards", "temperature of salt was cold before and hotter afterwards", "dilution of salt was weak before and strong afterwards", "state of salt was unapplied before and applied afterwards", "moisture of salt was dry before and wet afterwards", "cleanness of salt shaker was clean before and dirty afterwards", "location of salt was in package before and in water afterwards", "volume of bowl was fuller before and emptier afterwards."]}
{"id": "\ufeffCook Basmati Brown Rice|3", "answers": ["temperature of water was cold before and hot afterwards", "state of rice was uncooked before and cooked afterwards", "temperature of water was room temperature before and hot afterwards", "volume of the bowl was filled with more water before and filled with less water afterwards", "location of salt was in cup before and in bowl afterwards", "volume of bowl was empty before and full afterwards", "composition of water was pure before and mixed with salt afterwards", "temperature of salt was cold before and hotter afterwards", "location of water was in tap before and in bowl afterwards", "wetness of the bowl was drier before and wetter afterwards", "wetness of salt was dry before and wet afterwards", "volume of bowl was empty before and fuller afterwards", "location of water was in bag before and in bowl afterwards", "volume of pot was full before and empty afterwards."]}
{"id": "\ufeffCook Basmati Brown Rice|4", "answers": ["temperature of mixture was cooler before and hotter afterwards", "wetness of rice was dry before and wet afterwards", "temperature of water was cool before and hot afterwards", "state of rice was uncooked before and cooked afterwards", "wetness of rice was dry before and wet afterwards", "location of water was outside of pot before and inside pot afterwards", "temperature of water was room temperature before and hot afterwards", "temperature of water was cool before and hot afterwards", "temperature of rice was room temperature before and hot afterwards", "temperature of water was room temperature before and hot afterwards", "state of water was still before and boiling afterwards", "wetness of rice was dry before and wet afterwards."]}
{"id": "\ufeffCook Basmati Brown Rice|5", "answers": ["temperature of water was hot before and cool afterwards", "texture of rice was hard before and soft afterwards", "power of stove was off before and on afterwards", "texture of water was firm before and runny afterwards", "state of rice was uncooked before and cooked afterwards", "wetness of rice was dry before and wet afterwards", "temperature of water was cold before and hot afterwards", "texture of water was granular before and runny afterwards."]}
{"id": "\ufeffCook Basmati Brown Rice|6", "answers": ["weight of water pitcher was heavier before and lighter afterwards", "texture of pot was wet before and dry afterwards", "state of rice was hot before and warm afterwards", "location of towel was on counter before and on burner afterwards", "location of pan was on counter before and in hand afterwards", "cleanness of towel was clean before and dirty afterwards", "temperature of water was hot before and cooling down afterwards", "temperature of pan was cool before and hot afterwards", "wetness of towel was dry before and wet afterwards", "state of stove was off before and on afterwards", "power of stove was on before and off afterwards", "location of pan was on the counter before and on the burner afterwards", "temperature of rice was hot before and cool afterwards."]}
{"id": "\ufeffCook Basmati Brown Rice|7", "answers": ["wetness of rice was wet before and dry afterwards", "texture of rice was hard before and soft afterwards", "location of towel was on counter before and over rice afterwards", "temperature of rice was hot before and cool afterwards", "temperature of rice was hot before and cooler afterwards", "wetness of rice was wet before and dry afterwards", "temperature of pan was hot before and cooler afterwards", "state of rice was hot before and dry afterwards", "state of rice was uncooked before and cooked afterwards", "state of rice was uncooked before and cooked afterwards", "location of rice was in pot before and on burner afterwards", "temperature of pan was hot before and cooling afterwards", "moisture of towel was dry before and wet afterwards."]}
{"id": "\ufeffCook Basmati Brown Rice|8", "answers": ["cleanness of rice was unfluffed before and fanned afterwards", "moisture of rice was dry before and wet afterwards", "location of rice was in bowl before and in cup afterwards", "taste of rice was plain before and flavored afterwards", "cleanness of cup was clean before and dirty afterwards", "location of rice was in its place before and in cup afterwards", "location of straw was loose before and in rice afterwards", "moisture of rice was dry before and wet afterwards", "fullness of rice bowl was fuller before and emptier afterwards", "texture of rice was hard before and soft afterwards", "location of rice was in pot before and in cup afterwards", "state of ban was absent before and on afterwards", "state of rice was raw before and cooked afterwards", "state of water was still before and boiling afterwards."]}
{"id": "Paint a picture|1", "answers": ["space of space was unprepared before and prepared afterwards", "preparedness of space was unprepared before and prepared afterwards."]}
{"id": "Paint a picture|2", "answers": ["space of space was empty before and occupied by painting project afterwards", "moisture of ink was wet before and dry afterwards", "space of sketch was empty before and occupied by painting afterwards", "color of paint was empty before and lined afterwards", "state of space was bare before and painted afterwards", "location of pencil was on the table before and in hand afterwards", "state of paper was blank before and written on afterwards", "location of paint was in bottle before and on table afterwards", "color of table was bare before and painted afterwards."]}
{"id": "Paint a picture|3", "answers": ["color of space was less colorful before and more colorful afterwards", "color of paint was unpacked before and packed afterwards", "location of paint was in packet before and on table afterwards", "wetness of paint was dry before and wet afterwards", "moisture of table was dry before and wet afterwards", "location of paint was in container before and on wall afterwards", "location of pencil was in hand before and on table afterwards", "composition of paint was uncoated before and coated afterwards", "weight of painting container was heavy before and light afterwards", "location of paint was in the bottle before and on the table afterwards", "texture of paint was rough before and smooth afterwards", "cleanness of table was clean before and covered in paint afterwards", "color of space was lighter colored before and darker colored afterwards."]}
{"id": "Paint a picture|4", "answers": ["color of paper was blank before and marked with color afterwards", "color of brush was bare before and brush Used for paint prep before and use for painting afterwards", "moisture of paint was wet before and dry afterwards", "cleanness of paint brush was clean before and dirty afterwards."]}
{"id": "Paint a picture|5", "answers": ["complexity of background was plain before and decorated afterwards", "state of surface was bare before and painted afterwards", "color of background was unainted before and painted afterwards", "moisture of paint was wet before and dry afterwards", "cleanness of brush was clean before and dirty afterwards", "coverage of wall was uncovered before and covered with paint afterwards", "cleanness of brush was clean before and dirty afterwards", "moisture of paint was wet before and dry afterwards", "moisture of paint was wet before and dry afterwards", "openness of paint bucket was closed before and open afterwards."]}
{"id": "Paint a picture|6", "answers": ["color of background was bare before and painted afterwards", "moisture of brush was dry before and wet afterwards", "color of background was neutral before and colorful afterwards", "moisture of paintbrush was dry before and wet afterwards", "state of matter of brush was dry before and wet afterwards", "weight of paint container was heavier before and lighter afterwards", "cleanness of brush was clean before and dirty afterwards."]}
{"id": "Paint a picture|7", "answers": ["location of paint was in container before and on walls afterwards", "moisture of brush was dry before and wet afterwards", "wetness of paint was wet before and dry afterwards", "state of wall was bare before and painted afterwards", "moisture of brush was dry before and wet afterwards", "moisture of brush was dry before and wet afterwards", "location of paint was in bottle before and on wall afterwards", "moisture of paintbrush was dry before and wet afterwards."]}
{"id": "Paint a picture|8", "answers": ["location of paint was on brush before and hung on wall afterwards", "wetness of wall was dry before and wet afterwards", "color of background was bare before and painted afterwards", "state of painting was over before and done afterwards."]}
{"id": "Unlock iPhone|1", "answers": ["orientation of dial was in set up before and turned on afterwards", "state of phone was off before and on afterwards", "state of tv was off before and on afterwards"]}
{"id": "Unlock iPhone|2", "answers": ["location of right button was resting before and pressed afterwards", "state of phone was resting before and pressed afterwards", "state of right button was unpressed before and pressed afterwards", "state of iMessage was unselected before and selected afterwards", "orientation of phone was open before and closed afterwards."]}
{"id": "Unlock iPhone|3", "answers": ["state of face identification was unactivated before and activated afterwards", "state of your face identification was pressed before and unpressed afterwards", "power of phone was off before and on afterwards", "state of finger was touching the screen before and touching the screen afterwards", "orientation of face identification was random before and connected to device afterwards", "location of face identification was in your hand before and on the screen afterwards", "pressure of finger was resting before and pushing afterwards."]}
{"id": "Unlock iPhone|4", "answers": ["state of finger tip was untouched before and pressed afterwards", "state of phone was resting before and pressed afterwards", "pressure of finger was loose before and tight afterwards", "location of face identification was in keypad before and pressed on keypad afterwards", "state of key was unlocated before and located afterwards", "step of phone was unpressed before and pressed afterwards."]}
{"id": "Unlock iPhone|5", "answers": ["state of passcode was unentered before and entered afterwards", "state of face identification was entered before and performed afterwards", "state of your phone was being utilized before and turned off afterwards", "power of phone was off before and on afterwards", "state of passcode was unpressed before and pressed afterwards."]}
{"id": "Unlock iPhone|6", "answers": ["location of finger was on screen before and on code afterwards", "color of screen was black before and white afterwards", "state of phone was considered before and pressed afterwards."]}
{"id": "Braid Hair|1", "answers": ["state of hair was unbrushable before and brushable afterwards", "location of brush was in closet before and on the counter afterwards", "state of hair was away from brush before and combattable afterwards."]}
{"id": "Braid Hair|2", "answers": ["state of hair was untied before and tied afterwards", "location of hair was on bar before and in hand afterwards", "state of hair was untied before and tied afterwards", "state of hair was loose before and combinned afterwards."]}
{"id": "Braid Hair|3", "answers": ["composition of hair was separated before and combined afterwards", "state of hair was spread out before and in section afterwards", "organization of hair was disorganized before and organized afterwards", "organization of hair was separate before and combed afterwards."]}
{"id": "Braid Hair|4", "answers": ["length of hair was long before and shorter afterwards", "shape of hair was separated before and sectioned afterwards", "organization of hair was scattered before and consolidated afterwards", "state of hair was clumped before and straightened out afterwards."]}
{"id": "Braid Hair|5", "answers": ["state of hair was disorganized before and divided afterwards", "organization of hair was disorganized before and cross sectioned afterwards", "thickness of hair was thinner before and thicker afterwards."]}
{"id": "Braid Hair|6", "answers": ["state of hair was braided before and braided afterwards", "location of hair was in one section before and in a section afterwards", "shape of hair was long before and braided afterwards."]}
{"id": "Braid Hair|7", "answers": ["weight of hair tie was light before and heavier afterwards", "color of hair tie was white before and red afterwards", "state of braid was in progress before and finished afterwards", "location of braid was on the table before and in hand afterwards", "state of braid was untied before and tied afterwards", "color of hair tie was white before and red afterwards."]}
{"id": "Braid Hair|8", "answers": ["state of braid was unset before and set afterwards", "location of thread was in the hair bow before and tied to the hair tie afterwards", "shape of hair tie was loose before and tied in bow afterwards", "location of thread was in the hair bow before and in the set braid afterwards", "length of braid was long before and shorter afterwards."]}
{"id": "Putting on Contact Lenses|1", "answers": ["location of soap was in bottle before and in sink afterwards", "state of hands were dirty before and washing afterwards", "state of soap was diluted before and condensed afterwards", "location of soap was in container before and in sink afterwards", "moisture of sink was dry before and wet afterwards", "cleanness of soap dispenser was clean before and dirty afterwards", "location of soap was in bottle before and in sink afterwards", "location of detergent was in bottle before and in sink afterwards", "state of sink was empty before and full afterwards."]}
{"id": "Putting on Contact Lenses|2", "answers": ["location of lid was on the case before and off the case afterwards", "state of lens was covered before and uncovered afterwards", "orientation of lens was on one side before and facing forward afterwards", "location of lid was on before and off afterwards", "organization of case was messy before and organized afterwards", "state of lens was dirty before and clean afterwards", "location of lid was on the case before and off the case afterwards", "knowledge of knowledge of what contacts are was absent before and is present afterwards."]}
{"id": "Putting on Contact Lenses|3", "answers": ["location of finger was down before and up afterwards", "location of lens was attached to case before and removed from case afterwards", "state of lens was covered before and uncovered afterwards", "location of case was on the table before and in front of you afterwards", "state of lens was tight before and loose afterwards."]}
{"id": "Putting on Contact Lenses|4", "answers": ["cleanness of hand was clean before and dirty afterwards", "state of lens was dirty before and clean afterwards", "location of solution was in the container before and on the lens afterwards", "location of lid was on the case before and off the case afterwards", "moisture of lens was dry before and wet afterwards", "state of lens was foggy before and rinsed afterwards", "cleanness of contactslip was clean before and dirty afterwards", "location of water was in faucet before and in lens afterwards", "moisture of lens was dry before and wet afterwards", "moisture of finger was dry before and wet afterwards", "moisture of lens was dry before and wet afterwards."]}
{"id": "Putting on Contact Lenses|5", "answers": ["location of lens was on the table before and off the table afterwards", "state of lens was dry before and rinsed afterwards", "location of contact lens was on the case before and on the finger afterwards", "location of finger was in front of the case before and behind the case afterwards", "location of glue was in bottle before and on lens afterwards", "composition of sealant was thick before and thin afterwards", "cleanness of finger was clean before and covered in solution afterwards", "location of  lens was on the table before and on the contacts afterwards", "pressure of finger was relaxed before and gripped afterwards."]}
{"id": "Putting on Contact Lenses|6", "answers": ["position of middle finger was by your side before and up by your middle finger afterwards", "state of contact lens was open before and closed afterwards", "location of middle finger was on the case before and off the case afterwards", "state of your middle finger was empty before and holding a lens afterwards", "location of contact lens was on the case before and off the case afterwards", "composition of contact lens was intact before and rinsed of lens afterwards."]}
{"id": "Putting on Contact Lenses|7", "answers": ["location of lens was facing away from body before and facing forward afterwards", "orientation of contact lens was facing forward before and facing sideways afterwards", "state of middle finger was relaxed before and pushing through lens afterwards", "location of contact lens was facing forward before and facing backwards afterwards."]}
{"id": "Putting on Contact Lenses|8", "answers": ["location of contact lens was on the case before and on the iris afterwards", "state of hand was closed before and open afterwards", "location of contact lens was off the case before and on the case afterwards", "location of contact lens was on the case before and on the iris afterwards", "state of lens was uncovered before and covered afterwards."]}
{"id": "Putting on Contact Lenses|9", "answers": ["movement of contact was stationary before and moving afterwards", "movement of my middle finger was still before and moving slowly afterwards."]}
{"id": "Putting on Contact Lenses|10", "answers": ["movement of contact was stationary before and moving rapidly afterwards", "location of the contact lens was against the iris before and off the iris afterwards", "state of lens was uncovered before and covered afterwards."]}
{"id": "Putting on Contact Lenses|11", "answers": ["location of hand was in front of lens before and behind lens afterwards", "location of lid was on lens before and off lens afterwards"]}
{"id": "Make French Fries|1", "answers": ["temperature of oven was cool before and hot afterwards", "temperature of oven was cool before and hot afterwards", "state of oven was off before and on afterwards", "power of heat was off before and on afterwards", "temperature of oven temperature was cold before and hot afterwards", "electric conductivity of oven was turned off before and turned on afterwards", "temperature of oven was cold before and hot afterwards", "temperature of oven knob was in the off position before and in the on position afterwards."]}
{"id": "Make French Fries|2", "answers": ["temperature of oven was cold before and 425 degrees afterwards", "temperature of oven was cold before and hot afterwards", "fullness of bowl was empty before and full afterwards", "cleanness of peeler was clean before and dirty afterwards", "cleanness of plate was clean before and dirty afterwards", "location of peeler was in the box before and on the plate afterwards", "weight of bowl was lighter before and heavier afterwards", "weight of bowl was lighter before and heavier afterwards."]}
{"id": "Make French Fries|3", "answers": ["cleanness of knife was clean before and dirty afterwards", "cleanness of cutting board was clean before and dirty afterwards", "fullness of oven was less full before and more full afterwards", "cleanness of knife was clean before and dirty afterwards", "cleanness of cutting board was clean before and dirty afterwards", "cleanness of knife was clean before and dirty afterwards", "cleanness of plate was clean before and dirty afterwards."]}
{"id": "Make French Fries|4", "answers": ["fullness of pan was emptier before and fuller afterwards", "weight of oil bottle was heavier before and lighter afterwards", "location of oil was in bottle before and in pan afterwards", "weight of oil bottle was heavier before and lighter afterwards", "volume of pan was empty before and fuller afterwards", "cleanness of knife was clean before and dirty afterwards", "moisture of knife was dry before and wet afterwards", "cleanness of plate was clean before and dirty afterwards", "volume of pan was empty before and fuller afterwards", "weight of oil bottle was heavier before and lighter afterwards", "weight of plate was lighter before and heavier afterwards", "cleanness of frying pan was clean before and dirty afterwards", "fullness of pan was emptier before and fuller afterwards"]}
{"id": "Make French Fries|5", "answers": ["cleanness of frying pan was clean before and dirty afterwards", "shape of potato was whole before and diced afterwards", "wetness of frying pan was dry before and oily afterwards", "location of oil was in the bottle before and in the pan afterwards", "moisture of salt was dry before and wet afterwards", "fullness of frying pan was empty before and full afterwards", "location of oil was in the bottle before and on the pan afterwards", "cleanness of knife was clean before and dirty afterwards", "taste of oil was plain before and garlicky afterwards", "location of salt was in the cannister before and in the potatoes afterwards", "state of cheese was in block before and shredded afterwards."]}
{"id": "Make French Fries|6", "answers": ["state of cheese was in block before and shredded afterwards", "temperature of oil was cool before and hot afterwards", "state of pan was cold before and hot afterwards", "state of fryer was off before and on afterwards", "texture of oil was solid before and melted afterwards", "temperature of fryer was cold before and hot afterwards", "state of food was uncooked before and cooked afterwards", "state of oven was off before and on afterwards."]}
{"id": "Make French Fries|7", "answers": ["location of oil was in its container before and on the potatoes afterwards", "state of oil was separate before and mixed afterwards", "cleanness of fork was clean before and dirty afterwards", "state of cheese was in block form before and shredded afterwards", "moisture of potato was dry before and oiled afterwards", "texture of oil was firm before and soft afterwards", "taste of taste was unknown before and known afterwards", "temperature of fryer was cold before and hot afterwards", "temperature of cheese was cold before and hot afterwards", "state of oil was separate before and mixed afterwards"]}
{"id": "Tie a shoe|1", "answers": ["pressure of pressure of foot was loose before and tightened afterwards", "placement of shoe was loose before and on flat surface afterwards", "location of shoe was away from body before and on flat surface afterwards", "state of shoe was unpacked before and packed afterwards", "weight of shoe size was normal before and heavier afterwards", "location of shoe was loose before and on floor afterwards", "shape of shoe skin was flatter before and more rounded afterwards", "state of floor was clear before and occupied afterwards."]}
{"id": "Tie a shoe|2", "answers": ["location of shoe was on floor before and in loop afterwards", "material of shoe was made of few materials before and made of many materials afterwards", "composition of shoe skin was smooth before and laces afterwards", "location of shoe was on floor before and in loop afterwards", "lining of shoe was unlaces before and laces afterwards", "location of shoe was on the floor before and in the loop afterwards."]}
{"id": "Tie a shoe|3", "answers": ["location of other hand was elsewhere before and wrapped around lace afterwards", "state of lace was loose before and looped afterwards", "location of other hand was elsewhere before and on the loop afterwards", "wrapping of lace was empty before and wrapped around loop afterwards", "state of other hand was bare before and using my hand afterwards."]}
{"id": "Tie a shoe|4", "answers": ["state of lace was loose before and looped afterwards", "location of shoe was on floor before and in other hand afterwards", "composition of loop was without a loop before and looped afterwards", "state of shoe was loose before and knotted afterwards."]}
{"id": "Tie a shoe|5", "answers": ["location of shoe was on floor before and in other area afterwards", "location of shoelace was outside hole before and inside hole afterwards", "stability of loop was free before and held afterwards", "location of shoe was on the floor before and on the floor on which to loop afterwards."]}
{"id": "Tie a shoe|6", "answers": ["There will be no change."]}
{"id": "Tie a shoe|7", "answers": ["state of shoe was unsteady before and steady afterwards", "stability of lace was loose before and tight afterwards", "movement of foot was stationary before and moving afterwards", "location of shoe was on floor before and in hand afterwards."]}
{"id": "Make macaroni and cheese|1", "answers": ["location of water was in the pipes before and in the pot afterwards", "location of pot was in inventory before and in hand afterwards", "weight of the pot was lighter before and heavier afterwards", "container of pot was empty before and full afterwards", "moisture of pot was dry before and wet afterwards", "state of the pot was empty before and now full afterwards", "state of pot was empty before and full afterwards", "weight of the pot was lighter before and heavier afterwards."]}
{"id": "Make macaroni and cheese|2", "answers": ["weight of the pot was lighter before and heavier afterwards", "temperature of pot was cold before and hot afterwards", "state of stove was off before and on afterwards", "location of the pot was elsewhere before and on the stove afterwards", "electric conductivity of stove was turned off before and turned on afterwards", "location of pot was on counter before and in pot afterwards", "temperature of the pot was cold before and hot afterwards."]}
{"id": "Make macaroni and cheese|3", "answers": ["weight of the pot was heavier before and lighter afterwards", "wetness of pot was dry before and wet afterwards", "location of water was in the pipes before and in the pot afterwards", "fullness of pot was empty before and full afterwards", "moisture of pot was dry before and wet afterwards", "location of water was in the pipes before and in the pot afterwards", "wetness of the pot was dryer before and wetter afterwards", "location of pot was on counter before and on stove afterwards", "temperature of pot was cool before and hot afterwards", "volume of the pot was less full before and fuller afterwards", "weight of pot was light before and heavy afterwards."]}
{"id": "Make macaroni and cheese|4", "answers": ["form of starch was solid before and liquid afterwards", "temperature of water was cool before and hot afterwards", "temperature of pot was cold before and hot afterwards", "power of stove was off before and on afterwards", "temperature of stove was cold before and hot afterwards", "wetness of pot was dry before and wet afterwards", "temperature of water was cold before and hot afterwards", "location of water was in pot before and in sink afterwards", "temperature of pot was cold before and hot afterwards."]}
{"id": "Make macaroni and cheese|5", "answers": ["container of pan was full of food before and empty afterwards", "location of macaroni was on counter before and in pan afterwards", "fullness of pan was empty before and full afterwards", "wetness of pan was dry before and wet afterwards", "location of pan was in cupboard before and on stove afterwards", "location of macaroni was on counter before and in pan afterwards."]}
{"id": "Make macaroni and cheese|6", "answers": ["temperature of macaroni was hot before and cooler afterwards", "location of macaroni was in the package before and in the pan afterwards", "temperature of pot was hot before and cold afterwards", "cooking of macaroni was uncooked before and cooked afterwards", "weight of pan was lighter before and heavier afterwards", "cooking of macaroni was uncooked before and cooked afterwards", "volume of pot was empty before and full afterwards."]}
{"id": "Make macaroni and cheese|7", "answers": ["cleanness of pan was clean before and dirty afterwards", "weight of saucepan was lighter before and heavier afterwards", "weight of saucepan was lighter before and heavier afterwards", "state of macaroni was raw before and cooked afterwards", "wetness of macaroni was dry before and wet afterwards", "temperature of pan was cool before and hot afterwards", "location of macaroni was in pot before and in saucepan afterwards", "temperature of macaroni was cold before and hot afterwards", "location of macaroni was in pan before and on stove afterwards", "location of saucepan was in drawer before and on stove top afterwards."]}
{"id": "Make macaroni and cheese|8", "answers": ["cleanness of macaroni was dirty before and clean afterwards", "location of cheese was off of the macaroni before and on the macaroni afterwards", "hardness of macaroni was hard before and soft afterwards", "weight of saucepan was lighter before and heavier afterwards", "temperature of macaroni was cold before and hot afterwards", "cleanness of pot was clean before and dirty afterwards", "location of cheese was in package before and on stove afterwards", "temperature of macaroni was cold before and hot afterwards", "state of cheese was uncooked before and cooked afterwards", "wetness of macaroni was dry before and wet afterwards", "location of cheese was in package before and on stove afterwards", "temperature of macaroni was cool before and hot afterwards."]}
{"id": "Make macaroni and cheese|9", "answers": ["texture of cheese was loose before and tight afterwards", "composition of the cheese was separate before and mixed with the macaroni afterwards", "volume of pot was full before and empty afterwards", "state of macaroni was uncovered before and covered afterwards", "texture of cheese was hard before and soft afterwards."]}
{"id": "Make macaroni and cheese|10", "answers": ["temperature of macaroni was cold before and hot afterwards", "temperature of mixture was hot before and warm afterwards", "state of macaroni was solid before and melted afterwards", "thickness of cheese was thinner before and thicker afterwards", "location of cheese was on counter before and over cheese afterwards", "taste of cheese was inedible before and edible afterwards", "fullness of saucepan was full before and empty afterwards."]}
{"id": "Make macaroni and cheese|11", "answers": ["location of macaroni was on the counter before and in the eater's hand afterwards", "texture of macaroni was raw before and cooked afterwards", "cleanness of plate was clean before and dirty afterwards", "location of macaroni was on counter before and in eater's hands afterwards", "location of cheese was in pot before and on macaroni afterwards", "temperature of macaroni was cool before and hot afterwards", "texture of cheese was solid before and melted afterwards."]}
{"id": "Take the ferry to Rockaway Beach in Queens, New York|1", "answers": ["knowledge of definition of wall was unknown before and known afterwards."]}
{"id": "Take the ferry to Rockaway Beach in Queens, New York|2", "answers": ["state of person was wanting a ferry ticket before and in possession of a ticket afterwards", "ownership of ticket was in store before and bought afterwards", "ownership of ticket was returned before and obtained afterwards", "location of money was in wallet before and in envelope afterwards", "location of trip was in midtown before and at sea afterwards", "possession of wallet was full before and empty afterwards."]}
{"id": "Take the ferry to Rockaway Beach in Queens, New York|3", "answers": ["step of waiting in line was unstarted before and in progress afterwards", "location of rockaway was at stop before and in line afterwards", "state of line was unstarted before and started afterwards", "location of person was standing near the train before and sitting in line afterwards."]}
{"id": "Take the ferry to Rockaway Beach in Queens, New York|4", "answers": ["step of getting on the ferry was unfollowed before and followed afterwards", "location of person was off the ferry before and on the ferry afterwards", "location of person was off the ferry before and on the ferry afterwards"]}
{"id": "Take the ferry to Rockaway Beach in Queens, New York|5", "answers": ["location of person was outside of line before and inside of line afterwards", "location of seat was empty before and occupied afterwards", "weight of seat was light before and heavier afterwards."]}
{"id": "Take the ferry to Rockaway Beach in Queens, New York|6", "answers": ["location of person was on ground before and in water afterwards", "location of person was off the boat before and on the boat afterwards", "state of rockaway beach was unheld before and held afterwards."]}
{"id": "Take the ferry to Rockaway Beach in Queens, New York|7", "answers": ["location of person was on ground before and in water afterwards", "motion of person was moving before and stopped afterwards", "position of person was upright before and falling down afterwards", "location of person was on ground before and in water afterwards."]}
{"id": "Apply for a PhD|1", "answers": ["There will be no change."]}
{"id": "Apply for a PhD|2", "answers": ["choice of field was random before and chosen afterwards", "knowledge of field was unknown before and known afterwards"]}
{"id": "Apply for a PhD|3", "answers": ["state of hired gun was unemployed before and hired afterwards", "knowledge of person was unskilled before and skilled afterwards", "state of experience was lacking before and gained afterwards", "state of your position was lacking before and well-known afterwards"]}
{"id": "Apply for a PhD|4", "answers": ["writing of email was unopened before and opened afterwards", "state of position was vacant before and filled afterwards", "state of email was unopened before and opened afterwards."]}
{"id": "Apply for a PhD|5", "answers": ["state of agenda was nonexistant before and identified afterwards", "knowledge of focus was unknown before and known afterwards", "knowledge of budget was unknown before and known afterwards", "state of course was planned before and completed afterwards", "knowledge of task order was nonexistent before and specified afterwards", "step of new endeavor was unstarted before and in progress afterwards."]}
{"id": "Apply for a PhD|6", "answers": ["writing of statement was blank before and written afterwards", "volume of hand was empty before and holding pen afterwards", "state of paper was empty before and written afterwards", "state of statement of purpose was absent before and present afterwards", "state of paper was empty before and written afterwards", "organization of organization was vague before and specific afterwards", "content of paper was empty before and written afterwards", "state of statement of purpose was absent before and present afterwards", "purpose of statement was vague before and concrete afterwards."]}
{"id": "Apply for a PhD|7", "answers": ["state of paper was unread before and read afterwards", "length of time since grade was short before and long afterwards", "state of writing was non-existent before and in progress afterwards."]}
{"id": "Apply for a PhD|8", "answers": ["fullness of email account was empty before and full afterwards", "step of application was unposted before and posted afterwards", "fullness of webpage was less full before and more full afterwards", "state of application was considered before and accepted afterwards", "fullness of website was less full before and more full afterwards."]}
{"id": "Apply for a PhD|9", "answers": ["state of application was considered before and accepted afterwards", "time of appointment was month before and weeks afterwards", "state of application was pending before and accepted afterwards", "length of time since application was pending before and completed afterwards", "length of time since application was pending before and accepted afterwards."]}
{"id": "Play pickup basketball|1", "answers": ["volume of drawer was empty before and full afterwards", "texture of skin was dry before and sweaty afterwards"]}
{"id": "Play pickup basketball|2", "answers": ["state of area was poor before and good afterwards", "location of person was at home before and at courts afterwards."]}
{"id": "Play pickup basketball|3", "answers": ["There will be no change."]}
{"id": "Play pickup basketball|4", "answers": ["location of person was off the bench before and on the bench afterwards."]}
{"id": "Play pickup basketball|5", "answers": ["movement of the basketball was still before and moving afterwards", "state of game was on hold before and in progress afterwards", "state of game was on hold before and started afterwards", "motion of ball was still before and moving afterwards."]}
{"id": "Play pickup basketball|6", "answers": ["location of water was in bottle before and in mouth afterwards", "hydration of player was dehydrated before and hydrated afterwards", "location of water was in bottle before and in mouth afterwards", "state of person was thirsty before and satiated afterwards"]}
{"id": "Melt sugar|1", "answers": ["volume of sugar container was full before and empty afterwards", "location of sugar was in pantry before and in measuring cup afterwards", "moisture of sugar was dry before and wet afterwards", "state of sugar was solid before and liquid afterwards", "state of sugar was in granules before and dissolved afterwards", "weight of bowl was lighter before and heavier afterwards", "cleanness of measuring cup was clean before and dirty afterwards", "state of sugar was plain before and labeled afterwards", "location of sugar was in package before and in bowl afterwards", "cleanness of sugar measuring cup was clean before and dirty afterwards", "cleanness of sugar measuring cup was clean before and covered in sugar afterwards", "moisture of sugar was dry before and wet afterwards."]}
{"id": "Melt sugar|2", "answers": ["location of sugar was in container before and in pot afterwards", "temperature of water was cool before and warm afterwards", "temperature of water was cool before and warm afterwards", "fullness of pot was empty before and full afterwards", "cleanness of pot was clean before and dirty afterwards", "location of water was outside of pot before and inside pot afterwards", "location of sugar was outside of pot before and inside pot afterwards", "state of sugar was solid before and dissolved afterwards", "temperature of water was cool before and hot afterwards", "location of sugar was in package before and in pot afterwards", "location of cold water was outside of pot before and inside pot afterwards."]}
{"id": "Melt sugar|3", "answers": ["temperature of sugar was room temperature before and hot afterwards", "location of pot was on counter before and on stove afterwards", "temperature of stove was cool before and hot afterwards", "temperature of water was cool before and hot afterwards", "fullness of pot was empty before and full afterwards", "temperature of mixture was cooler before and hotter afterwards", "temperature of pot was cool before and hot afterwards", "state of stove was off before and on afterwards", "state of stove was off before and on afterwards", "volume of pot was empty before and full afterwards", "temperature of mixture was room temperature before and hot afterwards."]}
{"id": "Melt sugar|4", "answers": ["state of sugar was solid before and dissolved afterwards", "state of mixture was still before and stirred and agitated afterwards", "temperature of sugar was room temperature before and warm afterwards", "texture of sugar was granular before and dissolved afterwards."]}
{"id": "Melt sugar|5", "answers": ["state of sugar was solid before and melted afterwards", "state of the sugar was less solid before and less solid afterwards", "temperature of sugar was room temperature before and warm afterwards", "temperature of pot was cold before and hot afterwards", "location of stirring utensil was in drawer before and in pot afterwards", "age of the sugar was old before and fresh afterwards", "location of stirring utensil was in drawer before and in pot afterwards."]}
{"id": "Melt sugar|6", "answers": ["state of sugar was cool before and warm afterwards", "location of candy thermometer was absent before and present afterwards", "temperature of candy thermometer was neutral temperature before and warm afterwards", "state of sugar was solid before and melting afterwards", "temperature of sugar was cool before and warm afterwards", "temperature of mixture was cool before and hot afterwards."]}
{"id": "Make Rice Vinegar|1", "answers": ["composition of water was isolated before and mixed with rice afterwards", "state of rice was isolated before and mixed afterwards", "location of rice was in bag before and in bowl afterwards", "moisture of rice was dry before and wet afterwards", "location of water was outside of bowl before and inside bowl afterwards", "container of rice was in bag before and in bowl afterwards", "composition of rice was isolated before and mixed with starter afterwards", "state of rice was unbroked before and broken afterwards", "volume of water volume was greater before and lesser afterwards", "moisture of rice was dry before and wet afterwards", "location of starter was outside of bowl before and inside bowl afterwards", "location of rice was outside of bowl before and inside bowl afterwards", "location of water was outside of bowl before and inside bowl afterwards."]}
{"id": "Make Rice Vinegar|2", "answers": ["composition of rice was isolated before and combined with water afterwards", "coverage of starter was uncovered before and covered afterwards", "location of water was in a can before and in a bowl afterwards", "moisture of rice was dry before and wet afterwards", "location of starter was missing from rice before and in rice afterwards", "state of the rice was unbalanced before and balanced afterwards", "composition of starter was isolated before and combined with water afterwards", "moisture of rice was dry before and wet afterwards", "location of water was in a can before and in a bowl afterwards", "location of rice was in packet before and in bowl afterwards", "composition of the rice was isolated before and mixed with the rice afterwards", "location of rice was outside of mix before and inside mix afterwards", "location of water was outside of mix before and inside mixture afterwards", "location of the starter was outside of the rice before and inside the rice afterwards", "location of starter was missing from rice before and in rice afterwards"]}
{"id": "Make Rice Vinegar|3", "answers": ["location of rice was outside of container before and inside of container afterwards", "location of water was outside of container before and inside of container afterwards", "moisture of rice was dry before and wet afterwards", "location of rice was in package before and in container afterwards", "weight of rice container was lighter before and heavier afterwards", "composition of water was isolated before and mixed with starter afterwards", "volume of container was empty before and full afterwards", "location of water was outside of container before and inside of container afterwards", "moisture of starter was dry before and wet afterwards", "moisture of starter was bare before and wet afterwards", "location of rice was outside of container before and inside of container afterwards."]}
{"id": "Make Rice Vinegar|4", "answers": ["covering of container with chessecloth was bare before and covered afterwards", "covering of rice was uncovered before and covered afterwards", "location of chesse cloth was in its place before and covering rice container afterwards", "state of rice was uncovered before and covered with chessecloth afterwards", "covering of water was uncovered before and covered afterwards", "location of rice was in the pantry before and on the counter top afterwards", "state of rice was uncovered before and covered afterwards", "weight of rice container was lighter before and heavier afterwards", "covering of rice was bare before and covered afterwards", "covering of container was uncovered before and covered afterwards", "location of chessecloth was in the linen closet before and on the counter top afterwards", "container of rice was uncovered before and covered afterwards."]}
{"id": "Make Rice Vinegar|5", "answers": ["location of bowl was on the table before and in the hand afterwards", "location of mixture was in bowl before and in container afterwards", "emptiness of container was empty before and full afterwards", "temperature of rice was cool before and warm afterwards", "location of rice was in the pot before and in the container afterwards", "state of water was pure before and mixed with rice afterwards", "moisture of rice was dry before and wet afterwards", "container of container was empty before and full of rice and starter afterwards."]}
{"id": "Make Rice Vinegar|6", "answers": ["moisture of rice was dry before and wet afterwards", "stability of mixture was loose before and mixed and tested afterwards", "moisture of rice was dry before and wet afterwards", "power of tap was off before and on afterwards", "moisture of starter was dry before and wet afterwards", "moisture of chessecloth was dry before and wet afterwards", "temperature of water was cold before and hot afterwards", "openness of container was closed before and open afterwards."]}
{"id": "Make Rice Vinegar|7", "answers": ["wetness of rice was dry before and wet afterwards", "taste of mixture was sweet before and vinegar tasting afterwards", "cleanness of rice was dirty before and clean afterwards", "moisture of rice was dry before and wet afterwards", "wetness of rice was dry before and wet afterwards", "state of rice was untested before and tested afterwards."]}
{"id": "Make Rice Vinegar|8", "answers": ["composition of the mixture was mixed with chessecloth before and uncovered afterwards", "cleanness of filter was clean before and dirty afterwards", "moisture of chessecloth was dry before and wet afterwards", "color of water was clear before and vinegar colored afterwards", "state of the mixture was unverified before and verified afterwards", "visibility of the mixture was in the container before and out of the container afterwards."]}
{"id": "Make Rice Vinegar|9", "answers": ["location of vinegar was on the container before and in the fridge afterwards", "taste of mixture was less vinegary before and vinegar tasting afterwards", "moisture of vinegar was dry before and wet afterwards", "state of mix was uncloaked before and peeled afterwards", "location of vinegar was in the bottle before and in the container afterwards", "texture of mixture was loose before and tight afterwards", "state of chessecloth was dry before and wet afterwards."]}
{"id": "Make Rice Vinegar|10", "answers": ["cleanness of vinegar was dirty before and clean afterwards", "location of vinegar was in bowl before and on salad afterwards", "cleanness of bowl was dirty before and cleaner afterwards", "moisture of cheesecloth was dry before and wet afterwards", "texture of bowl was dry before and rougher afterwards."]}
{"id": "Write a book report|1", "answers": ["task of project was unstarted before and started afterwards", "state of task was unstarted before and started afterwards"]}
{"id": "Write a book report|2", "answers": ["knowledge of knowlwedge of what a book is was absent before and is present afterwards", "state of book was unread before and read afterwards", "location of book was on shelf before and in hands afterwards."]}
{"id": "Write a book report|3", "answers": ["state of paper was blank before and written on afterwards", "volume of hand was empty before and holding book afterwards", "state of notebook was closed before and open afterwards", "state of paper was blank before and annotated afterwards", "activity of hand was still before and active afterwards."]}
{"id": "Write a book report|4", "answers": ["state of paper was blank before and written on afterwards", "location of pencil was on the table before and in hand afterwards", "state of outline was absent before and created afterwards", "state of paper was blank before and written on afterwards", "step of outline was absent before and created afterwards", "state of notebook was closed before and open afterwards."]}
{"id": "Write a book report|5", "answers": ["state of outline was closed before and open afterwards", "state of your section was without an introduction before and now written about afterwards", "state of outline was closed before and open afterwards", "state of conclusion was unread before and read afterwards", "location of notebook was in a drawer before and on the table afterwards."]}
{"id": "Write a book report|6", "answers": ["state of setting was unresearched before and researched afterwards", "state of book cover was blank before and covered in a section afterwards", "step of setting was unclear before and known afterwards", "state of outline was absent before and created afterwards", "state of book cover was bare before and covered in a section afterwards"]}
{"id": "Write a book report|7", "answers": ["state of outline was unread before and read afterwards", "state of book cover was bare before and covered afterwards", "location of book cover was on the cover before and in the hand afterwards", "state of section was unread before and read afterwards", "location of book was in hand before and reviewed afterwards."]}
{"id": "Write a book report|8", "answers": ["clarity of plot was unconfirmed before and confirmed afterwards", "state of book was unread before and read afterwards."]}
{"id": "Write a book report|9", "answers": ["state of outline was closed before and open afterwards", "state of book was unread before and read afterwards", "state of line length was vague before and prominent afterwards", "activity of reader was inactive before and active afterwards."]}
{"id": "Write a book report|10", "answers": ["state of style was nonexistent before and prominent afterwards", "state of book was unread before and read afterwards", "length of line was even before and cut afterwards."]}
{"id": "Write a book report|11", "answers": ["step of note was blank before and written afterwards", "state of tone was absent before and prominent afterwards", "state of conclusion was absent before and present afterwards", "state of book was unsigned before and signed afterwards."]}
{"id": "Write a book report|12", "answers": ["location of paper was in hands before and on desk afterwards", "state of paper was blank before and written on afterwards", "state of paper was blank before and annotated afterwards", "step of paper was blank before and edited afterwards"]}
{"id": "Write a book report|13", "answers": ["step of someone else was reading the paper before and now reading the paper afterwards", "state of paper was blank before and edited afterwards."]}
{"id": "Write a book report|14", "answers": ["pressure of task was unhear before and studied afterwards", "state of paper was empty before and full afterwards", "state of paper was blank before and written on afterwards."]}
{"id": "Wash dirty clothes by hand|1", "answers": ["color of clothing was white before and colored afterwards", "clothes of clothing was white before and colored afterwards", "color of clothing was white before and colored afterwards", "state of clothing was separated before and separated afterwards", "state of person was clothed before and alone afterwards", "color of clothing was white before and colored afterwards."]}
{"id": "Wash dirty clothes by hand|2", "answers": ["location of clothes were in closet before and in washing machine afterwards", "location of washing supplies were put away before and laid in a clean container afterwards", "location of white clothes were in the closet before and on the washing machine afterwards", "location of colored clothes were in container before and in washing machine afterwards"]}
{"id": "Wash dirty clothes by hand|3", "answers": ["location of soap was in bottle before and on stain remover afterwards", "weight of container was lighter before and heavier afterwards", "location of stain remover was in container before and on clothes afterwards", "cleanness of stain remover was clean before and dirty afterwards", "moisture of fabric was dry before and wet afterwards", "location of white clothes were in a container before and treated with a pre-wash stain remover afterwards", "wetness of stained was dry before and wet afterwards", "fullness of container was fuller before and emptier afterwards", "state of soap was in bottle before and rubbed on stain remover afterwards", "weight of washing machine was lighter before and heavier afterwards", "location of soap was in bottle before and in container afterwards", "fullness of container was full before and empty afterwards."]}
[truncated: 345,098 more chars]
