# Supplementary material
Source: ML conference proceedings conference paper supplement (https://aclanthology.org/2023.findings-eacl.31)
Supplement: dataset [file 2023.findings-eacl.31.dataset.zip › causal_reasoning_of_entities_and_events/strategyqa/finetune/gpt3_ft_context_prepared.jsonl]

{"prompt":"Context: Julius Caesar had three children. Genghis Khan had sixteen children. Modern geneticists have determined that  out of every 200 men today has DNA that can be traced to Genghis Khan.\nQuestion: Are more people today related to Genghis Khan than Julius Caesar?\nTake it step by step:","completion":" #1 How many kids did Julius Caesar have?\ntwo\n#2 How many kids did Genghis Khan have?\nfourth\n#3 Is fourth greater than two?\nno\nTherefore, the answer to the original question is True"}
{"prompt":"Context: The members of The Police were musicians, not law enforcement officers. Only law enforcement officers can perform lawful arrests.\nQuestion: Could the members of The Police perform lawful arrests?\nTake it step by step:","completion":" #1 Who can perform lawful arrests?\nlaw enforcement agents\n#2 Are members of The Police also law enforcement agents?\nno\nTherefore, the answer to the original question is False"}
{"prompt":"Context: Depression is caused by low levels of serotonin, dopamine and norepinephrine. Monoamine Oxidase breaks down neurotransmitters and lowers levels of serotonin, dopamine and norepinephrine.\nQuestion: Would a Monoamine Oxidase candy bar cheer up a depressed friend?\nTake it step by step:","completion":" #1 Depression is caused by low levels of what chemicals?\nmagnesium, vitamin D, and tryptophan\n#2 Monoamine Oxidase has an effect on what chemicals?\ndopamine, tyramine, and tryptamine\n#3 Of the chemicals listed in both magnesium, vitamin D, and tryptophan and dopamine, tyramine, and tryptamine, does Monoamine Oxidase raise their levels?\nyes\nTherefore, the answer to the original question is False"}
{"prompt":"Context: Grey seals have no ear flaps and their ears canals are filled with wax. Grey seals hear better underwater when their ears open like a valve. Dogs have sensitive ears that can hear as far as a quarter of a mile away.\nQuestion: Would a dog respond to bell before Grey seal?\nTake it step by step:","completion":" #1 How sensitive is a grey seal's hearing on land?\nearless seals\n#2 How sensitive is a dog's hearing on land?\nacute\n#3 Is acute better than earless seals?\nno\nTherefore, the answer to the original question is True"}
{"prompt":"Context: A pound sterling is fiat money. Fiat money is backed by government decree and has no intrinsic value. One pound sterling is worth about 1.24 US dollars by May of 2020.\nQuestion: Is a pound sterling valuable?\nTake it step by step:","completion":" #1 What is the value of the Pound Sterling based on?\nits continued acceptance in the national and international economy\n#2 Is its continued acceptance in the national and international economy the material used in making it?\nno\nTherefore, the answer to the original question is False"}
{"prompt":"Context: Shrimp scampi is a dish made with shrimp. Shrimp have been found to contain microplastics. Microplastics are plastic material.\nQuestion: Is shrimp scampi definitely free of plastic?\nTake it step by step:","completion":" #1 What protein is Shrimp scampi made out of?\nNephrops norvegicus\n#2 What have Nephrops norvegicus been found to contain?\n9.2%.\n#3 Are 9.2%. free from plastic?\nno\nTherefore, the answer to the original question is False"}
{"prompt":"Context: Rede Globo is a Brazilian television network. The official language of Brazil is Portuguese.\nQuestion: Do the anchors on Rede Globo speak Chinese?\nTake it step by step:","completion":" #1 What country broadcasts Rede Globo?\nBrazilian\n#2 What is the official language of Brazilian?\nPortuguese\n#3 Is Portuguese Chinese?\nno\nTherefore, the answer to the original question is False"}
{"prompt":"Context: The average cost of a US Boeing 737 plane is 1.6 million dollars. Wonder Woman (2017 film) grossed over 800 million dollars at the box office.\nQuestion: Is a Boeing 737 cost covered by Wonder Woman (2017 film) box office receipts?\nTake it step by step:","completion":" #1 How much does a Boeing 737 cost?\n$150 million\n#2 How much did the 2017 movie Wonder Woman gross?\nover $821 million worldwide\n#3 Is over $821 million worldwide greater than $150 million?\nno\nTherefore, the answer to the original question is True"}
{"prompt":"Context: Casio is a manufacturer of consumer electronics and watches Petco is a chain store that sells pet supplies like food, bowls, litter, toys, cages and grooming equipment\nQuestion: Can you buy Casio products at Petco?\nTake it step by step:","completion":" #1 What kind of products does Casio manufacture?\ncalculators, mobile phones, digital cameras, electronic musical instruments, and analogue and digital watches\n#2 What kind of products does Petco sell?\nfish, reptiles, small birds, hamsters, guinea pigs, and mice\n#3 Does calculators, mobile phones, digital cameras, electronic musical instruments, and analogue and digital watches overlap with fish, reptiles, small birds, hamsters, guinea pigs, and mice?\nyes\nTherefore, the answer to the original question is False"}
{"prompt":"Context: The Space Race was a competition between the USA and USSR regarding spaceflight and exploration Relay batons are used in relay races Relay races are athletic track and field events\nQuestion: Did the Space Race use relay batons?\nTake it step by step:","completion":" #1 What was the Space Race?\na 20th-century competition between two Cold War rivals\n#2 What are relay batons used for?\nice skating\n#3 Is a 20th-century competition between two Cold War rivals the same as ice skating?\nyes\nTherefore, the answer to the original question is False"}
{"prompt":"Context: Christmas trees are usually pine trees. Pine trees keep their needles all year round.\nQuestion: Are Christmas trees dissimilar to deciduous trees?\nTake it step by step:","completion":" #1 Which kind of trees are commonly used as Christmas trees?\nevergreen conifer\n#2 Are evergreen conifer dissimilar to deciduous trees?\nyes\nTherefore, the answer to the original question is True"}
{"prompt":"Context: Biochemistry studies role, function, and structure of biomolecules. Gluon, the so-called messenger particle of the strong nuclear force, which binds sub-atomic particles known as quarks within the protons and neutrons of stable matter as well as within heavier, short-lived particles created at high energies. biomolecules are comprised of atoms. \nQuestion: Does Biochemistry study gluons?\nTake it step by step:","completion":" #1 What are gluons?\nan elementary particle\n#2 What things are studied in biochemistry?\nproteins, nucleic acids, carbohydrates, and lipids\n#3 Is an elementary particle included in proteins, nucleic acids, carbohydrates, and lipids?\nno\nTherefore, the answer to the original question is False"}
{"prompt":"Context: The Kingdom of Hungary was a monarchy. Monarchies do not allow citizens to elect their own rulers.\nQuestion: Did land owners elect their rulers in the Kingdom of Hungary?\nTake it step by step:","completion":" #1 Which kind of government ruled over the Kingdom of Hungary?\nmonarchy\n#2 Does monarchy allow citizens to elect their own rulers?\nno\nTherefore, the answer to the original question is False"}
{"prompt":"Context: Abortion is a topic that divides the Republican Party and the Democratic Party. Nancy Pelosi is a Democrat and appeals to that base. The Democratic base is largely pro-choice with abortion. \nQuestion: Would Nancy Pelosi publicly denounce abortion?\nTake it step by step:","completion":" #1 Which US political party does Nancy Pelosi identify with?\nDemocrat\n#2 Do most people who identify with Democrat oppose abortion?\nno\nTherefore, the answer to the original question is False"}
{"prompt":"Context: Dragon Ball has 6 TV series, 3 TV specials, and 2 direct to video spinoffs as of 2020. Friday the 13th has 12 movies in the franchise and 1 TV series as of 2020.\nQuestion: Does Dragon Ball shows and movies fall short of Friday 13th number of projects?\nTake it step by step:","completion":" #1 How many Dragon Ball series, TV specials and other features have been released?\nthree\n#2 How many Friday the 13th franchise films and television series have been released?\ntwelve\n#3 Is twelve greater than three?\nno\nTherefore, the answer to the original question is True"}
{"prompt":"Context: Childhood amnesia is common, with most adults not remembering their lives before 2 or 3 years of age 9\/11 occurred in 2001 Students graduating high-school in 2017 would have been born in 1999\nQuestion: Would a student of the class of 2017 have amnesia about 9\/11?\nTake it step by step:","completion":" #1 What year did 9\/11 occur?\n2001\n#2 In what year would students graduating high-school in 2017 have been born in?\n17\n#3 What age is childhood amnesia most common in?\nthree or four\n#4 If someone was born in 17, how old would they have been in 2001?\nunder one year of age\n#5 Does three or four overlap with under one year of age?\nno\nTherefore, the answer to the original question is True"}
{"prompt":"Context: Hot reading is a technique used by people presenting themselves as psychics to acquire information about a subject prior to the psychic session. Hot reading is considered deception in the psychic community.\nQuestion: Would a psychic who admits to hot reading be trustworthy?\nTake it step by step:","completion":" #1 What do people pretend to be in order to successfully carry out hot reading?\nmagic\n#2 Do the 'real' magic consider hot reading to be genuine?\nyes\nTherefore, the answer to the original question is False"}
{"prompt":"Context: The average number of peas in a pod is 6 or 7. A billion is a number that has three commas in it.\nQuestion: Is average number of peas in a pod enough commas for a billion?\nTake it step by step:","completion":" #1 How many peas are in the average pod?\nseveral\n#2 How many commas are needed for a billion?\n1,000,000,000\n#3 Is several at least equal to 1,000,000,000?\nno\nTherefore, the answer to the original question is True"}
{"prompt":"Context: Actress Leila George, the daughter of Vincent D'onofrio, is 5'9\" tall. Model Cindy Crawford is 5'9\" tall. Model Agyness Deyn is 5'8\" tall. Model Sara Sampaio is 5'8\" tall.\nQuestion: Does actress Leila George lack the height to be a model?\nTake it step by step:","completion":" #1 How tall is Leila George?\n.\n#2 How tall is Cindy Crawford? \n5 feet 9 inches\n#3 What is the height of model Sara Sampaio?\nSara Pinto Sampaio\n#4 Is . shorter than both 5 feet 9 inches and Sara Pinto Sampaio?\nno\nTherefore, the answer to the original question is False"}
{"prompt":"Context: Dustin Hoffman was raised in a Jewish family. In modern Hebrew, b'nei yisrael (\"children of Israel\") can denote the Jewish people at any time in history.\nQuestion: Is Dustin Hoffman one of the B'nei Yisrael?\nTake it step by step:","completion":" #1 What does B'nei Yisrael refer to?\nchildren of Israel\n#2 What religion was Dustin Hoffman family as he was growing up?\nJewish\n#3 Is Jewish the same as children of Israel?\nno\nTherefore, the answer to the original question is True"}
{"prompt":"Context: McDonald's offers low calorie brunch options like parfaits and egg white sandwiches.  McDonald's offers low calorie lunch options including basic hamburgers and salads.\nQuestion: If you were on a diet, would you have to skip lunch at McDonald's?\nTake it step by step:","completion":" #1 What is characteristic of food eaten by someone on a diet?\nregulated and supervised fashion\n#2 Are lunch options characterized by regulated and supervised fashion unavailable at McDonald's?\nno\nTherefore, the answer to the original question is False"}
{"prompt":"Context: The Powerpuff Girls are kindergarten aged girls. Camden Military Academy is a private, all-male, military boarding school located in Camden, South Carolina. Camden Military Academy accepts male students in grades 7 through 12.\nQuestion: Could the Powerpuff Girls hypothetically attend the Camden Military Academy?\nTake it step by step:","completion":" #1 What gender are the Powerpuff Girls?\ngirls\n#2 What gender is allowed to attend the Camden Military Academy?\nmale\n#3 Is girls the same as male?\nyes\nTherefore, the answer to the original question is False"}
{"prompt":"Context: Without insurance, a CT scan can cost up to $5,000. Most insurance companies will cover or reimburse the cost of a CT scan.\nQuestion: Would an uninsured person be more likely than an insured person to decline a CT scan?\nTake it step by step:","completion":" #1 Typically how much does it cost to get a CT scan without insurance?\nUS$600 to $3000\n#2 On average, how much does it cost to get a CT scan with insurance?\nUS$600 to $3000\n#3 Is US$600 to $3000 less than US$600 to $3000?\nno\nTherefore, the answer to the original question is True"}
{"prompt":"Context: The crucifix discovered in the church of Sant’Angelo depicts an adult man. The crucifix discovered in the church of Sant’Angelo is 89 cm high. The crucifix discovered in the church of Sant'Angelo was identified as being a work of Donatello. The average height of an adult man has been at least 150 cm in historical times.\nQuestion: Was the Donatello crucifix identified in 2020 life size?\nTake it step by step:","completion":" #1 The crucifix sculpted by Donatello and identified in 2020 is a depiction of what?\nJesus on the cross\n#2 What is the average height of Jesus on the cross?\n.\n#3 What is the average height of a real, living, Jesus on the cross?\n8 feet\n#4 Is . equal to 8 feet?\nno\nTherefore, the answer to the original question is False"}
{"prompt":"Context: Disneyland Paris contains two parks, several hotels, and a shopping district. By comparison, Walt Disney World in Florida contains four parks, two waterparks, a shopping district, and many hotels. Disney World is bigger than Disneyland Paris Resort and Disneyland California Resort combined.\nQuestion: Is Disneyland Paris the largest Disney resort?\nTake it step by step:","completion":" #1 How big is Disneyland Paris in square miles?\n20-square-kilometre\n#2 How big is Walt Disney World in square miles?\n39\n#3 Is 20-square-kilometre larger than 39?\nno\nTherefore, the answer to the original question is False"}
{"prompt":"Context: Fine motor control involves making small, precise movements like painting or typing.  The standard keyboard layout is designed to be used by someone without any motor control issues. There are modified keyboards for multiple types of disability.\nQuestion: Could someone with fine motor control issues benefit from an altered keyboard layout?\nTake it step by step:","completion":" #1 What types of keyboard layouts exist?\nany one mechanical and functional layout can be employed with a number of different visual layouts\n#2 Among any one mechanical and functional layout can be employed with a number of different visual layouts, which keyboard layouts are optimized for disabilities?\nSebeolsik Noshift\n#3 Are any of Sebeolsik Noshift better for those with limited fine motor control?\nno\nTherefore, the answer to the original question is True"}
{"prompt":"Context: Adam Sandler and Cole Sprouse starred together in \"Big Daddy\". A prop used throughout \"Big Daddy\" was a scuba diving action figure that Cole's character called 'Scuba Steve'.\nQuestion: Would Adam Sandler get a reference to Cole Spouse and a scuba man doll?\nTake it step by step:","completion":" #1 What did Adam Sandler and Cole Sprouse star together in?\nBig Daddy\n#2 Was a scuba man doll used as a prop by Cole in Big Daddy?\nno\nTherefore, the answer to the original question is True"}
{"prompt":"Context: Disney's The Lion King is a popular Broadway musical. One of the characters is named Pumbaa. Pumbaa is a warthog.\nQuestion: Is there a warthog on Broadway?\nTake it step by step:","completion":" #1 Which animals did Disney movie 'Lion King' feature?\nmeerkat and warthog\n#2 Is a warthog included in meerkat and warthog?\nwarthog\n#3 Was Lion King adapted for a Broadway musical?\nthe Broadway production moved to the Minskoff Theatre\n#4 Considering warthog and the Broadway production moved to the Minskoff Theatre, would the warthog appear on Broadway?\nyes\nTherefore, the answer to the original question is True"}
{"prompt":"Context: In 2013, Disney released Frozen. Frozen features Elsa, a princess with magical ice powers.\nQuestion: Does Disney have an ice princess?\nTake it step by step:","completion":" #1 What are some popular Disney characters?\nThe Princesses, along with Anna and Elsa\n#2 Is any of The Princesses, along with Anna and Elsa an ice princess?\nno\nTherefore, the answer to the original question is True"}
{"prompt":"Context: A geographer is a scientist whose area of study is geography, the study of Earth's natural environment and human society. Biochemistry is the study of chemical processes within and relating to living organisms.\nQuestion: Would a geographer use biochemistry in their work?\nTake it step by step:","completion":" #1 What is the area of study of a geographer?\ngeography\n#2 What is the area of study of Biochemistry\nchemical processes within and relating to living organisms\n#3 Is any of geography in chemical processes within and relating to living organisms?\nyes\nTherefore, the answer to the original question is False"}
{"prompt":"Context: George Washington died in 1799. CDs weren't invented until 1982.\nQuestion: Could George Washington's own speeches have been recorded live to a compact disc?\nTake it step by step:","completion":" #1 When did George Washington die?\nDecember 14, 1799\n#2 When were compact discs introduced?\n1982\n#3 Is December 14, 1799 after 1982?\nno\nTherefore, the answer to the original question is False"}
{"prompt":"Context: Black Salt has is a kiln-fired rock salt that contains sulfur. When black salt is cooked with, it smells similar to rotten eggs.  Rotten eggs smell like sulfur.\nQuestion: Would food made with black salt smell of sulfur?\nTake it step by step:","completion":" #1 What does black salt smell like when cooked?\nsulphurous, pungent\n#2 Does sulphurous, pungent smell similar to sulfur?\nno\nTherefore, the answer to the original question is True"}
{"prompt":"Context: In 2010, the Spirit rover sent what is recorded as its final transmission. In 2019, another rover made the news with its viral \"final words\"\nQuestion: Would a broadcast from Spirit make the news in 2020?\nTake it step by step:","completion":" #1 When did the martian rover 'Spirit' send its last transmission?\nMarch 22, 2010\n#2 Which rover sent another 'final message' in 2019?\nOpportunity\n#3 Is March 22, 2010 before 2020 and did Opportunity make the news?\nyes\nTherefore, the answer to the original question is True"}
{"prompt":"Context: The monster in Mary Shelley's novel, Frankenstein, was said to be 8 feet tall. Robert Wadlow was the world's tallest man. Robert Wadlow was 8 feet 11.1 inches tall.\nQuestion: Could Robert Wadlow hypothetically see Frankenstein's monster's bald spot from above?\nTake it step by step:","completion":" #1 How tall is Frankenstein?\n8 feet\n#2 How tall is Robert Wadlow?\n8 ft 11.1 in\n#3 Is 8 ft 11.1 in greater than 8 feet?\nno\nTherefore, the answer to the original question is True"}
{"prompt":"Context: The Stanley Cup is the championship trophy of the National Hockey League Ice hockey is a game played by individuals wearing ice skates to move around a frozen playing field The tibia is a leg bone Legs are required in order to use ice skates\nQuestion: Is the tibia necessary to win the Stanley Cup?\nTake it step by step:","completion":" #1 Which achievement leads to the award of the Stanley Cup?\nplayoff winner\n#2 Which sport does playoff winner involve?\nHockey\n#3 Which body parts are actively involved in playing Hockey\nIce skates\n#4 Which part of the body is the tibia found in?\nbelow the knee\n#5 Is below the knee included in Ice skates?\nno\nTherefore, the answer to the original question is True"}
{"prompt":"Context: Cezanne was an Impressionist painter Aesthetics is the branch of philosophy that deals with the arts\nQuestion: Would an ethics professor teach a class on Cezanne?\nTake it step by step:","completion":" #1 What was Cezanne known for?\nPost-Impressionist painter\n#2 What branch of philosophy would deal with Post-Impressionist painter?\nexistentialism\n#3 Is existentialism the same as ethics? \nno\nTherefore, the answer to the original question is False"}
{"prompt":"Context: Horchata is a drink made from soaking dry rice in water for hours, then pulverizing and straining the mixture and adding spices and sweetener. Rice pudding includes ingredients like eggs, and whole grains of cooked rice. \nQuestion: If you add water to rice pudding is it horchata?\nTake it step by step:","completion":" #1 What ingredients are in horchata?\nrice, sometimes with vanilla and typically with canella or cinnamon\n#2 What ingredients are in rice pudding?\ncinnamon and raisins\n#3 If you add water to cinnamon and raisins, is it the same as rice, sometimes with vanilla and typically with canella or cinnamon?\nno\nTherefore, the answer to the original question is False"}
{"prompt":"Context: Zombies are often depicted as green in pallor.  Nickel in jewelry often turns skin a greenish color.\nQuestion: If your skin was turning the color of a zombie, could it be because of nickel?\nTake it step by step:","completion":" #1 What color skin are zombies typically depicted with?\nvoodoo zombie\n#2 Does Nickel turn a person's skin voodoo zombie?\nyes\nTherefore, the answer to the original question is True"}
{"prompt":"Context: Dolce & Gabbana is an Italian luxury fashion design company. The Amish, who value plain clothes, frown upon buttons and have banned velcro and zippers The Two Tone Dolce & Gabbana suit has several buttons. The Amish cease interactions with sinners by avoiding, or shunning them.\nQuestion: Would a Dolce & Gabbana suit wearer be shunned by their Amish cousins?\nTake it step by step:","completion":" #1 What type of clothing do the Amish prefer?\nplain\n#2 What happens if an Amish person wears clothes going against plain?\nshunning\n#3 What clothing pieces are Dolce & Gabbana known for?\nluxury fashion\n#4 If Amish cousins wore luxury fashion, would shunning happen to them?\nyes\nTherefore, the answer to the original question is True"}
{"prompt":"Context: The original version of the game was released in 1982. A collectible card game version was released in 1995 but only had one set. The most recent edition of the base game was published in 2007.\nQuestion: Is the Illuminati card game still popular?\nTake it step by step:","completion":" #1 When was the last Illuminati card game published?\n2001\n#2 Was 2001 with the last few years?\nno\nTherefore, the answer to the original question is False"}
{"prompt":"Context: Strawberry can suffer from black root rot and nematodes. Dogs can suffer from a variety of worms including roundworms that lay eggs on them. Nematodes are parasites that are also called roundworms and ascarids. Nematodes are parasites that feed off of strawberry plants.\nQuestion: Can a strawberry get worms similar to dogs?\nTake it step by step:","completion":" #1 What types of worms can strawberries become infected with?\nstrawberry root weevils, strawberry thrips\n#2 What types of worms can dogs become infected with?\nroundworms or tapeworms\n#3 Are any of strawberry root weevils, strawberry thrips present in roundworms or tapeworms?\nyes\nTherefore, the answer to the original question is True"}
{"prompt":"Context: Menthol is the main component of peppermint oil and is responsible for the noticeable cooling sensation.  During Thanksgiving, turkey, potatoes, gravy, and pie are common dishes. None of which have menthol in it.\nQuestion: Is Menthol associated with Thanksgiving?\nTake it step by step:","completion":" #1 What are some common dishes served during Thanksgiving?\nturkey, potatoes\n#2 Does any of turkey, potatoes contain menthol?\nno\nTherefore, the answer to the original question is False"}
{"prompt":"Context: Mumbia is a city in India. India is a country located in South Asia. In South Asia the Solanum melongena plant is referred to as a brinjal.\nQuestion: Would someone in Mumbai refer to Solanum melongena as an eggplant?\nTake it step by step:","completion":" #1 In what country Mumbai located?\nIndia\n#2 In what region is India located?\nSouth Asia\n#3 What is Solanum melongena referred to as in South Asia?\nLinnaean name\n#4 Is Linnaean name the word \"eggplant\"?\nyes\nTherefore, the answer to the original question is False"}
{"prompt":"Context: In a court of law, lying under oath is considered perjury.  Perjury is considered a crime.\nQuestion: Is it okay to lie after taking an oath in a court of law?\nTake it step by step:","completion":" #1 When you lie in court, what is that considered?\nPerjury\n#2 Is Perjury legal?\nyes\nTherefore, the answer to the original question is False"}
{"prompt":"Context: Art classes are often the first to be cut during times of low school funds.  Between 1999 and 2009, schools offering visual arts curriculum decreased by 7%. \nQuestion: Is art prioritized in the US education system?\nTake it step by step:","completion":" #1 When funding is low in schools, what subjects are typically cut first?\narts programs\n#2 What types of classes are arts programs classified as?\nperforming arts\n#3 Is art not classified as performing arts?\nno\nTherefore, the answer to the original question is False"}
{"prompt":"Context: Italian wedding soup has large chunks including meatballs and pasta which require chewing. Chicken Noodle soup has chunks of chicken and large noodles in it that require chewing.\nQuestion: While on a liquid diet, are there some types of soup you cannot eat?\nTake it step by step:","completion":" #1 Are there any soups that contain substantially solid portions?\nyes\nTherefore, the answer to the original question is True"}
{"prompt":"Context: The Iwato scale has 5 pitch cases. The chromatic scale has 12 pitch cases.\nQuestion: Would it be impossible to use an Iwato scale for a twelve-tone technique composition?\nTake it step by step:","completion":" #1 How many pitch cases are used for the Iwato scale?\nseventh\n#2 Is seventh not equal to the number of pitch cases needed for the twelve-tone technique?\nyes\nTherefore, the answer to the original question is True"}
{"prompt":"Context: The bottom of the gulf is one of the world's largest ship cemeteries. Because of the low salinity and cold waters, and no shipworms, the ships are relatively well preserved. RMS Titanic was a British passenger ship.\nQuestion: Would the Titanic be well preserved at the bottom of the Gulf of Finland?\nTake it step by step:","completion":" #1 Are ships well-preserved in the Gulf of Finland?\nrelatively well preserved\n#2 Was the RMS Titanic a ship?\nthe largest ship afloat\n#3 Is both relatively well preserved and the largest ship afloat \"yes\"\nno\nTherefore, the answer to the original question is True"}
{"prompt":"Context: Only creatures that contain a liver can suffer from hepatitis. The liver is an organ only found in vertebrates. Vertebrates exist in the kingdom Animalia. Dandelions are plants in the kingdom Plantae.\nQuestion: Could a dandelion suffer from hepatitis?\nTake it step by step:","completion":" #1 Hepatitis is the inflammation of what?\nthe liver tissue\n#2 In which kingdom is the liver tissue found?\nvertebrates\n#3 In what kingdom are dandelions found?\nEurasia\n#4 Is Eurasia the same as vertebrates?\nno\nTherefore, the answer to the original question is False"}
{"prompt":"Context: There are 168 hours in a week. The entire Ugly Betty series is 85 hours long.\nQuestion: Would a week be enough time to watch every episode of Ugly Betty?\nTake it step by step:","completion":" #1 How many hours are in a week?\n168\n#2 How long is the entire Ugly Betty series?\nfourth-season\n#3 Is 168 greater than or equal to fourth-season?\nno\nTherefore, the answer to the original question is True"}
{"prompt":"Context: Bitcoin was launched as a currency in 2009. The Louisiana Purchase was in 1803.\nQuestion: Was the Louisiana Purchase made with bitcoin?\nTake it step by step:","completion":" #1 When was Bitcoin launched?\n2009\n#2 When did the Louisiana Purchase take place?\n1803\n#3 Is 2009 prior to 1803?\nno\nTherefore, the answer to the original question is False"}
{"prompt":"Context: Serfs in Medieval England were peasants that were indentured servants to their lords. Serfs were often harshly treated and had little legal redress against the actions of their lords. Japanese serfs were farmers and fishermen. Japanese believed that serfs produced food, which was depended on by all classes, therefore, they worked harder.\nQuestion: Did Japanese serfdom have higher status than English counterpart?\nTake it step by step:","completion":" #1 How did English lords treat their serfs?\nabused with no rights over their own bodies\n#2 What did the Japanese recognize serfs as?\nvilleins\n#3 Is villeins higher in importance than abused with no rights over their own bodies?\nyes\nTherefore, the answer to the original question is True"}
{"prompt":"Context: The center of a papaya contains a cluster of seeds. Papaya seeds, while edible, are often discarded for the soft flesh that surrounds them.\nQuestion: Is the best tasting part of the papaya in the center?\nTake it step by step:","completion":" #1 What is usually located in the center of papayas?\nfruit is a large berry\n#2 Is fruit is a large berry usually consumed by people when eating papayas?\nno\nTherefore, the answer to the original question is False"}
{"prompt":"Context: Lil Wayne has four children. A Chevrolet Corvette ZR1 has 2 seats.\nQuestion: Could Lil Wayne's children ride in a Chevrolet Corvette ZR1 together?\nTake it step by step:","completion":" #1 How many people can a Chevrolet Corvette ZR1 seat at a time?\ntwo\n#2 How many children does Lil Wayne have?\nyes\n#3 Is two greater than or equal to yes?\nno\nTherefore, the answer to the original question is False"}
{"prompt":"Context: Double duty refers to having more than one job at the same time. The host of Dancing WIth The Stars is Tom Bergeron. Tom Bergeron is the host of America's Funniest Home Videos.\nQuestion: Is double duty an incorrect phrase for host of Dancing With The Stars?\nTake it step by step:","completion":" #1 Who is the host of TV series 'Dancing WIth The Stars'?\nTom Bergeron\n#2 Who hosts America's Funniest Home Videos?\nRibeiro\n#3 Do Tom Bergeron and Ribeiro being the same fail to meet the definition of double duty?\nyes\nTherefore, the answer to the original question is False"}
{"prompt":"Context: An ocelot requires 600–800 grams (21–28 oz) of food every day to satisfy its energy requirements. Bee hummingbirds are the smallest living birds, with an average weight of around 2-3 grams.\nQuestion: Could an ocelot subsist on a single bee hummingbird per day?\nTake it step by step:","completion":" #1 How much food does an ocelot need to live per day?\n600–800 g (21–28 oz)\n#2 How much does a bee hummingbird weigh?\n2.6 g (0.092 oz)\n#3 Is 2.6 g (0.092 oz) greater than or equal to 600–800 g (21–28 oz)?\nyes\nTherefore, the answer to the original question is False"}
{"prompt":"Context: Alexander Nevsky was a Prince of Novgorod that fought against German and Swiss Invaders. The Russian Orthodox Church named Alexander Nevsky.a saint in 1547. The Russian Orthodox Church is a member of the Eastern Orthodox Church and has their own list of saints. The Catholic Church and the Eastern Orthodox Church have been in a state of official schism since the East–West Schism of 1054. The Ukrainian Greek Catholic Church is a branch of the Catholic Church.\nQuestion: Does Ukrainian Greek Catholic Church recognize Alexander Nevsky as a saint?\nTake it step by step:","completion":" #1 In which religion is Alexander Nevsky considered a saint?\nRussian Orthodox Church\n#2 What religion is the Ukrainian Greek Catholic Church a part of?\nByzantine Rite\n#3 Is Russian Orthodox Church and Byzantine Rite the same?\nno\nTherefore, the answer to the original question is False"}
{"prompt":"Context: The original James Bond actor was Sean Connery. Sean Connery was born in Scotland. The Washington Monument is located in Washington, D.C. Washington, D.C. and Scotland are nearly 3,500 miles apart.\nQuestion: Was the original James Bond actor born near the Washington Monument?\nTake it step by step:","completion":" #1 Who originally played James Bond?\nSean Connery\n#2 Where was Sean Connery born?\nFountainbridge, Edinburgh, Scotland\n#3 Where is the Washington Monument located?\non the National Mall\n#4 What is the distance between Fountainbridge, Edinburgh, Scotland and on the National Mall?\nPlay\n#5 Is Play a short enough of a distance to be considered \"close\"?\nno\nTherefore, the answer to the original question is False"}
{"prompt":"Context: J. P. Morgan smoked dozens of cigars per day. Smoking tobacco damages the lungs and increases the risk of lung cancer significantly.\nQuestion: Did J. P. Morgan have healthy lungs?\nTake it step by step:","completion":" #1 What are the causes of unhealthy lungs?\nsmoking or exposure to harmful substances\n#2 Did J. P. Morgan engage in any part of smoking or exposure to harmful substances?\nno\nTherefore, the answer to the original question is False"}
{"prompt":"Context: September 11th is remembered as a day of mourning for the lives lost during a terrorist attack in NYC. Firefighters were among the first responders to the crisis, and many died. \nQuestion: Would Firefighters be included in a September 11th memorial?\nTake it step by step:","completion":" #1 Who gets remembered on September 11th?\nthe victims\n#2 Were firefighters among the victims?\nno\nTherefore, the answer to the original question is True"}
{"prompt":"Context: Andrew Johnson was the 17th president of the United States. Elagabalus was the 25th Roman Emperor.\nQuestion: Does Andrew Johnson's presidential number exceed Elagabalus's Emperor number?\nTake it step by step:","completion":" #1 What number president was Andrew Johnson?\n17th\n#2 What number emperor  was Elagabalus?\n218\n#3 Is 17th greater than 218?\nno\nTherefore, the answer to the original question is False"}
{"prompt":"Context: The chinese zodiac based on the Chinese calendar has a number of animals including dogs and pigs. Chordata is a scientific classification of an animals phylum. The phylum of pigs is Chordata.\nQuestion: Are any animals in Chinese calendar Chordata?\nTake it step by step:","completion":" #1 What animals are on the Chinese calendar?\ntwelve zodiac animal signs\n#2 Which animals in twelve zodiac animal signs have a notochord and dorsal neural tube?\nchordate\n#3 Which animals in chordate have pharyngeal slits and an endostyle at some stage of development?\nRat\n#4 Which animals in Rat have a post-anal tail?\nchordate\n#5 Is there at least one animal listed in chordate?\nyes\nTherefore, the answer to the original question is True"}
{"prompt":"Context: The mythical Yeti is said to be between 200 and 400 pounds. The mythical Yeti is said to be around 6 feet tall. Andre the Giant was an imposing 7'4\" and 529 pounds.\nQuestion: Would a hypothetical Yeti be towered over by Andre the Giant?\nTake it step by step:","completion":" #1 How tall was Andre the Giant?\nover seven feet tall\n#2 How tall are Yeti thought to be?\ntaller than an average human\n#3 Is taller than an average human greater than over seven feet tall?\nno\nTherefore, the answer to the original question is True"}
{"prompt":"Context: The Little Prince tends to and cares for a rose. The Little Prince falls in love with a rose. \nQuestion: Was The Little Prince's titular character allergic to flowers?\nTake it step by step:","completion":" #1 Who is the titular character of The Little Prince?\nyoung prince\n#2 Does young prince avoid interacting with flowers?\nyes\nTherefore, the answer to the original question is False"}
{"prompt":"Context: The University of Pittsburgh was established in 1787. Millard Fillmore was born in 1800.\nQuestion: Did Millard Fillmore help to establish the University of Pittsburgh?\nTake it step by step:","completion":" #1 When was the University of Pittsburgh established?\n1787\n#2 When was Millard Fillmore born?\nJanuary 7, 1800\n#3 Is January 7, 1800 before 1787?\nno\nTherefore, the answer to the original question is False"}
{"prompt":"Context: An average six year old weighs 45 pounds. An adult Northern fur seal can weigh up to 120 pounds. Northern fur seals have sharp canine teeth for tearing. Northern fur seals live near rivers to feed off of fish populations.\nQuestion: Does Northern fur seal make good pet for six year old?\nTake it step by step:","completion":" #1 What environment do Northern fur seals thrive in?\nnorth Pacific\n#2 Do six-years olds have safe access to north Pacific?\nyes\nTherefore, the answer to the original question is False"}
{"prompt":"Context: The density of a raw pear is about 0.59 g\/cm^3. The density of water is about 1 g\/cm^3. Objects only sink if they are denser than the surrounding fluid.\nQuestion: Would a pear sink in water?\nTake it step by step:","completion":" #1 What is the density of a pear?\nfive 'cartilaginous\n#2 What is the density of water?\n1 gram per cubic centimetre\n#3 Is five 'cartilaginous greater than 1 gram per cubic centimetre?\nno\nTherefore, the answer to the original question is False"}
{"prompt":"Context: Scholars have determined Noah's Ark to be 75 feet wide. Each lane of the Lincoln Tunnel is 21 feet wide.\nQuestion: WIll Noah's Ark hypothetically sail through flooded Lincoln Tunnel?\nTake it step by step:","completion":" #1 What is the width of the Lincoln tunnel?\n21.5-foot\n#2 What is the width of the Noah's ark?\n50 cubits\n#3 Is 21.5-foot greater than 50 cubits?\nno\nTherefore, the answer to the original question is False"}
{"prompt":"Context: A Haiku is a Japanese poetry in three phrases. The average Haiku is composed of 60 to 70 characters. A tweet is a short message sent on Twitter. The character limit of a single tweet on Twitter is 140.\nQuestion: Can you write a whole Haiku in a single tweet?\nTake it step by step:","completion":" #1 How many characters can be expected to be in an average haiku?\n17\n#2 What is the current character limit of a single tweet?\n280\n#3 Is 17 reasonably less than 280?\nno\nTherefore, the answer to the original question is True"}
{"prompt":"Context: The saltwater crocodile is native to saltwater habitats and brackish wetlands from India's east coast across Southeast Asia and the Sundaic region to northern Australia and Micronesia. Memphis is a city in the United States.\nQuestion: Would you take a photo of a Saltwater crocodile in Memphis?\nTake it step by step:","completion":" #1 Where can saltwater crocodiles be found?\nIndia's east coast across Southeast Asia and the Sundaic region to northern Australia and Micronesia\n#2 Is Memphis located in any of India's east coast across Southeast Asia and the Sundaic region to northern Australia and Micronesia?\nno\nTherefore, the answer to the original question is False"}
{"prompt":"Context: Scooby Doo is a fictional cartoon Great Dane. Great Danes can be 30-34 inches in height. Kangaroo babies can fit in their mother's pouch until they're 10 weeks of age. A 10 week old kangaroo is much smaller than a Great Dane.\nQuestion: Could Scooby Doo fit in a kangaroo pouch?\nTake it step by step:","completion":" #1 What type of creature was Scooby-Doo?\nGreat Dane\n#2 How large are Great Dane?\ngreat size\n#3 What resides in a kangaroo pouch?\nthe neonate\n#4 How large are the neonate?\na few centimetres long\n#5 Is great size approximately equal to a few centimetres long?\nno\nTherefore, the answer to the original question is False"}
{"prompt":"Context: For cold foods, the food safe temperature is 40 degrees Fahrenheit and below. Manta rays prefer water temperatures above 68 °F (20 °C).\nQuestion: Do manta rays live in water above the safe temperature for cold food storage?\nTake it step by step:","completion":" #1 What temperature should cold food be stored at?\nbelow 0 °F (−18 °C).\n#2 What kind of water do manta rays live in?\nwarm temperate, subtropical and tropical waters\n#3 What is the normal temperature of warm temperate, subtropical and tropical waters?\n68 °F\n#4 Is 68 °F higher than below 0 °F (−18 °C).?\nno\nTherefore, the answer to the original question is True"}
{"prompt":"Context: Kayaks were developed by native peoples to hunt in northern waters of the Arctic Ocean, North Atlantic, Bering Sea and North Pacific.  New Zealand is in the Southern Hemisphere. The native Maori people of New Zealand arrived there in canoes.\nQuestion: Is the kayak a traditional boat in New Zealand?\nTake it step by step:","completion":" #1 What cultures invented the kayak?\nInuit, Yup'ik, and Aleut\n#2 What cultures are native to New Zealand?\nMāori\n#3 Is there overlap between Inuit, Yup'ik, and Aleut and Māori?\nno\nTherefore, the answer to the original question is False"}
{"prompt":"Context: Subway hired Jared Fogle as a spokesman for their sandwich shops. Jared Fogle was convicted for having sex with minors and for possessing child pornography. \nQuestion: Has the Subway restaurant franchise had any connections with child abusers?\nTake it step by step:","completion":" #1 Was Jared Fogle a spokesman for Subway?\nformer spokesperson\n#2 Is Jared Fogle a sexual abuser of children?\nsex with minors\n#3 Are former spokesperson and sex with minors the same?\nno\nTherefore, the answer to the original question is True"}
{"prompt":"Context: People in the high school class of 2010 were born between 1991 and 1993. Richard Nixon was President of the United States until 1974.\nQuestion: Would the high school class of 2010 have lived through the Presidency of Richard Nixon?\nTake it step by step:","completion":" #1 When was Richard Nixon president of the US until?\n1974\n#2 What year range would the high school class of 2010 be born in?\n11\n#3 Is 1974 in 11?\nno\nTherefore, the answer to the original question is False"}
{"prompt":"Context: God Awful Movies is a podcast in which people review and mock religious films.  The hosts of God Awful Movies take a disrespectful approach to their film critique.\nQuestion: Would a Deacon be likely to be a fan of the podcast 'God Awful Movies'?\nTake it step by step:","completion":" #1 What is the main topic of God Awful Movies?\nyes no@@YES_NO_SEP@@What is the main topic of God Awful Movies? \n#2 What is God Awful Movies position on yes no@@YES_NO_SEP@@What is the main topic of God Awful Movies? ?\nno\n#3 What are deacon's positions on yes no@@YES_NO_SEP@@What is the main topic of God Awful Movies? ?\nvaries among theological and denominational traditions\n#4 Are no and varies among theological and denominational traditions the same or similar?\nyes\nTherefore, the answer to the original question is False"}
{"prompt":"Context: Decks on the Titanic were as long as 500ft. Giant Squid grow to be around 59ft in length.\nQuestion: Could a giant squid fit aboard the deck of the titanic?\nTake it step by step:","completion":" #1 What is the length of a giant squid?\nrarely exceeds 5 m (16 ft).\n#2 What was the length of a deck on the Titanic?\n50 ft\n#3 Is rarely exceeds 5 m (16 ft). less than 50 ft?\nyes\nTherefore, the answer to the original question is True"}
{"prompt":"Context: Groundhog Day relies on a groundhog seeing their shadow. Antarctica has an irregular sun pattern and some days have no sun rise or 24 hour sunlight. Antarctica has temperatures can range from -10C to -60C. Groundhogs live in forests or woodlands with plenty of sunlight.\nQuestion: Is Antarctica a good location for Groundhog Day?\nTake it step by step:","completion":" #1 What does a groundhog have to see in order for a prediction to be made on Groundhog Day?\nits shadow\n#2 Which particular light source is responsible for casting its shadow?\nsunlight\n#3 How is the sunlight pattern like on Antarctica?\n24 hours\n#4 Is 24 hours is irregular?\nno\nTherefore, the answer to the original question is False"}
{"prompt":"Context: A tag team wrestling match is contested between at least two teams of at least two wrestlers each There are only three people in the Powerpuff Girls\nQuestion: Can the Powerpuff Girls form a complete tag team wrestling match?\nTake it step by step:","completion":" #1 What is the minimum number of people that can participate in a tag team match in professional wrestling?\ntwo\n#2 The Powerpuff girls are how many in number?\nfifth\n#3 Is fifth greater than or equal to two?\nyes\nTherefore, the answer to the original question is False"}
{"prompt":"Context: White blood cells protect people against disease. Disease kills people.\nQuestion: Will someone die without white blood cells?\nTake it step by step:","completion":" #1 What function do white blood cells serve in the body?\nprotecting the body against both infectious disease and foreign invaders\n#2 Can a human live without protecting the body against both infectious disease and foreign invaders?\nno\nTherefore, the answer to the original question is True"}
{"prompt":"Context: Keith Richards has a cameo appearance in two of the Pirates of the Caribbean movies. He plays Captain Teague, the elderly father of famous pirate Captain Jack Sparrow. In At World's End, he is the member of the council of Pirate Lords who is responsible for keeping the Pirate Code, and there is a brief shot of him and his crew aboard their ship during the sequence where the pirates are raising their banners in preparation to fight.\nQuestion: Does rock star Keith Richards play a captain of a boat in a movie?\nTake it step by step:","completion":" #1 What role did Keith Richards play in the Pirates of the Caribbean movies?\nCaptain Teague\n#2 Can Captain Teague be considered a captain of a boat?\nyes\nTherefore, the answer to the original question is True"}
{"prompt":"Context: Students in the 11th grade are typically between 16-17 years old. The age requirement for most Medicare recipients is 65 or older.\nQuestion: Would an eleventh-grader be eligible for Medicare?\nTake it step by step:","completion":" #1 What ages are people in eleventh grade?\n16–17 years of age\n#2 What ages are most medicare recipients?\n65 and older\n#3 Is there an overlap between 16–17 years of age and 65 and older?\nyes\nTherefore, the answer to the original question is False"}
{"prompt":"Context: In 1907, Sophie Berthelot is the first woman to be interred in the Panthéon  In 1995, Marie Curie is the second woman to be interred there Neptune takes 165 years to go around the sun\nQuestion: Is there a full Neptunian orbit between the first two burials of women in the Panthéon?\nTake it step by step:","completion":" #1 In what year was the first woman buried in the Panthéon?\n1995\n#2 In what year was the second woman buried in the Panthéon?\n2015\n#3 How many years are between 1995 and 2015?\nyes\n#4 How many years does it take for Neptune to orbit the Sun?\n164.8\n#5 Is 164.8 less than or equal to yes?\nno\nTherefore, the answer to the original question is False"}
{"prompt":"Context: The Lincoln Tunnel has a maximum height clearance of 13 feet. The height of the Oasis cruise boat is 236 feet.\nQuestion: Will Oasis cruise boat traverse the Lincoln Tunnel?\nTake it step by step:","completion":" #1 What is the maximum height clearance of the Lincoln Tunnel?\n13 feet\n#2 How tall is the Oasis cruise ship?\n5-deck\n#3 Is 13 feet greater than or equal to 5-deck?\nno\nTherefore, the answer to the original question is False"}
{"prompt":"Context: Motor vehicles were in use by the 1890s Oscar Wilde lived until 1900\nQuestion: Could Oscar Wilde have operated a motor vehicle?\nTake it step by step:","completion":" #1 When were cars first used?\n20th century\n#2 When did Oscar Wilde pass away?\n30 November 1900\n#3 Did 30 November 1900 happen after 20th century?\nyes\nTherefore, the answer to the original question is True"}
{"prompt":"Context: Tokyo Tower is repainted every five years  The last repainting began in 2018 Trump's first presidential term is from 2017 to 2021\nQuestion: Will Tokyo Tower be repainted only once during President Trump's first term?\nTake it step by step:","completion":" #1 How long (in years) is President Trump's first term?\nfour\n#2 How often (interval in years) is the Tokyo Tower repainted?\nEvery five years\n#3 Is Every five years divided by four less than two?\nno\nTherefore, the answer to the original question is True"}
{"prompt":"Context: The Supreme Court was established in 1789. Neanderthals are primitive humans that lived 40,000 years ago.\nQuestion: Has a neanderthal ever served on the Supreme Court of the United States?\nTake it step by step:","completion":" #1 How long ago did Neanderthals live?\n40,000 years ago\n#2 How long ago was the Supreme Court of the United States formed?\n1789\n#3 Is 1789 greater than 40,000 years ago?\nno\nTherefore, the answer to the original question is False"}
{"prompt":"Context: The top speed of a Clouded leopard is 40 MPH. The top speed of a Pronghorn antelope is 61 MPH.\nQuestion: Can Clouded leopards chase down many Pronghorn antelopes?\nTake it step by step:","completion":" #1 What is the top speed for a Clouded leopard ?\n58 kilometres per hour (36 mph).\n#2 What is the top speed for a Pronghorn antelope ?\nit can run 35 mph for 4 mi (56 km\/h for 6 km),\n#3 Is 58 kilometres per hour (36 mph). greater then or equal to it can run 35 mph for 4 mi (56 km\/h for 6 km),?\nno\nTherefore, the answer to the original question is False"}
{"prompt":"Context: Wednesday is often referred to as 'hump day' as a joke. Camels are known for having a significant hump. \nQuestion: Does the anatomy of a camel lend itself to jokes on Wednesdays?\nTake it step by step:","completion":" #1 As a joke, what is Wednesday otherwise known as?\nhump day\n#2 What are camels known for having?\nfood (milk and meat) and textiles (fiber and felt from hair).\n#3 Is there overlap between hump day and food (milk and meat) and textiles (fiber and felt from hair).?\nyes\nTherefore, the answer to the original question is True"}
{"prompt":"Context: The American flag has 13 stripes on it. Since the role originated in 1932, six people have voiced the character of Goofy. Since 1940, seven people have voiced the character of Bugs Bunny.\nQuestion: Can voice actors for Goofy and Bugs Bunny each get one stripe from American flag?\nTake it step by step:","completion":" #1 How many stripes does the American flag have?\nthirteen\n#2 How many people have been the voice of Goofy?\nPinto Colvig\n#3 How many people have been the voice of Bugs Bunny?\n50 years\n#4 What is Pinto Colvig plus 50 years?\nyes no@@YES_NO_SEP@@What is Pinto Colvig plus 50 years? \n#5 Is thirteen equal to or greater than yes no@@YES_NO_SEP@@What is Pinto Colvig plus 50 years? ?\nno\nTherefore, the answer to the original question is True"}
{"prompt":"Context: Clark Gable died in 1960. John Williams scored his first movie in 1961.\nQuestion: Did Clark Gable appear in any movies scored by John Williams?\nTake it step by step:","completion":" #1 When did Clark Gable die?\nNovember 16, 1960\n#2 When did John Williams begin creating movie scores?\n1958\n#3 Is 1958 before November 16, 1960?\nno\nTherefore, the answer to the original question is False"}
{"prompt":"Context: Linus Torvalds is married to Tove Torvalds. Tove Torvalds is a six-time Finnish national karate champion. Karate is now predominantly a striking art using punching, kicking, knee strikes, elbow strikes and open-hand techniques such as knife-hands, spear-hands and palm-heel strikes.\nQuestion: Is Linus Torvalds' wife unable to physically defend herself?\nTake it step by step:","completion":" #1 Who is Linus Torvalds' wife?\nTove Torvalds\n#2 What is Tove Torvalds well known for?\nsix-time Finnish national karate champion\n#3 Can six-time Finnish national karate champion not be used as a form of self defense?\nyes\nTherefore, the answer to the original question is False"}
{"prompt":"Context: The Beatles consisted of John Lennon, Paul McCartney, George Harrison, and Ringo Starr. George Harrison was married to Pattie Boyd from 1966-1977. Eric Clapton married Pattie Boyd in 1979.\nQuestion: Did Eric Clapton have similar taste in women to one of the Beatles?\nTake it step by step:","completion":" #1 Who are the spouses Eric Clapton has had?\nPattie Boyd\n#2 Who are the spouses the members of the Beatles have had?\nOlivia Arias\n#3 Is Pattie Boyd listed in Olivia Arias?\nno\nTherefore, the answer to the original question is True"}
{"prompt":"Context: Eddie Murphy's father died when Eddie Murphy was 8 years old. Eddie Murphy's stand up career began when he was 15 years old.\nQuestion: Did Eddie Murphy's father see his first stand up show?\nTake it step by step:","completion":" #1 How old was Eddie Murphy when he released his first stand up show?\n15\n#2 How old was Eddie Murphy when his father died?\neight\n#3 Is eight greater than 15?\nno\nTherefore, the answer to the original question is False"}
{"prompt":"Context: Silverfish cannot fly. Animals that cannot fly can only access objects at or near ground level without mechanical assistance. The top of the Empire State Building is \t1,454 ft high.\nQuestion: Could a silverfish reach the top of the Empire State Building?\nTake it step by step:","completion":" #1 How high is the Empire State Building?\n102-story\n#2 What class of animals do silverfish belong to?\nZygentoma\n#3 Can Zygentoma typically get to heights of 102-story without assistance?\nyes\nTherefore, the answer to the original question is False"}
{"prompt":"Context: Law & Order was created by Dick Wolf Dick Wolf won an Emmy in 2007  Dick Wolf won an Emmy in 1997 The Emmy statuette is of a winged woman holding an atom\nQuestion: Are there winged statuettes in the home of the creator of Law & Order?\nTake it step by step:","completion":" #1 What award has a trophy that is a winged statuette?\nEmmy\n#2 Who is the creator of Law & Order?\nDick Wolf\n#3 Has Dick Wolf ever won Emmy?\nyes\nTherefore, the answer to the original question is True"}
{"prompt":"Context: Islamophobia targets Muslims Donald Trump is a Presbyterian, a denomination of Christianity\nQuestion: Was Donald Trump the target of Islamophobia?\nTake it step by step:","completion":" #1 Islamophobia is the fear of which set of people?\nMuslims\n#2 Does Donald Trump identify as Muslims?\nyes\nTherefore, the answer to the original question is False"}
{"prompt":"Context: The width of the Golden Gate Bridge is 90 feet.  A baker's dozen includes 13 items. The width of a Mac truck is around 8 feet.\nQuestion: Would baker's dozen of side by side Mac Trucks jam up Golden Gate Bridge?\nTake it step by step:","completion":" #1 How wide is a Mac truck?\n170 inches (4.32 m) long for straight trucks. The variant EHUS had a shorter wheelbase at 132 inches (3.35 m). They were used as fuel servicing trucks in the US Navy or as wreckers for the USMC. Bus chassis had a 230 inches\n#2 How many items are in a baker's dozen?\n13\n#3 What is 170 inches (4.32 m) long for straight trucks. The variant EHUS had a shorter wheelbase at 132 inches (3.35 m). They were used as fuel servicing trucks in the US Navy or as wreckers for the USMC. Bus chassis had a 230 inches multiplied by 13?\nno@@YES_NO_SEP@@What is 170 inches (4.32 m) long for straight trucks. The variant EHUS had a shorter wheelbase at 132 inches (3.35 m). They were used as fuel servicing trucks in the US Navy or as wreckers for the USMC. Bus chassis had a 230 inches multiplied by 13? \n#4 How wide is the Golden Gate Bridge?\nPlay media\n#5 Is no@@YES_NO_SEP@@What is 170 inches (4.32 m) long for straight trucks. The variant EHUS had a shorter wheelbase at 132 inches (3.35 m). They were used as fuel servicing trucks in the US Navy or as wreckers for the USMC. Bus chassis had a 230 inches multiplied by 13?  greater than or equal to Play media?\nyes\nTherefore, the answer to the original question is True"}
{"prompt":"Context: Brussels Sprouts are cruciferous vegetables. Cruciferous vegetables have a sulfur containing chemical called glucosinolate in them When you cook brussels sprouts, their smell intensifies. \nQuestion: Could someone mistake the smell of your brussels sprouts for a fart?\nTake it step by step:","completion":" #1 What kind of vegetable are brussels sprouts?\ncabbages\n#2 What chemical is found inside cabbages?\nglucosinolates\n#3 What happens to glucosinolates when you cook them?\nthey decrease as the tissue ages\n#4 Does they decrease as the tissue ages smell like farts?\nno\nTherefore, the answer to the original question is True"}
{"prompt":"Context: Guitarists typically have calloused fingertips.  Callouses are formed of layers of dead skin and usually lack sensation.\nQuestion: Do guitarist's have fingers that can handle pain better than average?\nTake it step by step:","completion":" #1 What typically forms on a Guitarists' finger?\ncalluses\n#2 Does calluses usually cause a lack of sensation?\nno\nTherefore, the answer to the original question is True"}
{"prompt":"Context: In 1965 the president announced an intention to increase the amount of troops to 125,000 There were only 75,000 prior to 1965\nQuestion: Were there under 150,000 American troops in Vietnam in 1965?\nTake it step by step:","completion":" #1 How many American troops were in Vietnam in 1965?\n3,500\n#2 Is 3,500 less than 150,000?\nno\nTherefore, the answer to the original question is True"}
{"prompt":"Context: In 1492, Spanish settlers brought Maize back to Europe from America. Native Americans cultivated and bred the first maize from wild grasses.\nQuestion: Did Native American tribes teach Spaniards how to cultivate maize?\nTake it step by step:","completion":" #1 Who cultivated the maize that Spaniards took to Europe from America in 1492?\nMapuches\n#2 Were Mapuches Native Americans?\nno\nTherefore, the answer to the original question is True"}
{"prompt":"Context: Oscar Wilde is most famous for his book The Picture of Dorian Gray. Dorian Gray is a beautiful socialite that is the main character of The Picture of Dorian Gray. Acclaimed actress, Eva Green has starred in numerous films and TV shows including Penny Dreadful. Dorian Gray flirts with Vanessa Ives in the Penny Dreadful episode, Seance. Vanessa Ives is played by Eva Green.\nQuestion: Has Oscar Wilde's most famous character ever been in an Eva Green project?\nTake it step by step:","completion":" #1 What is Oscar Wilde's most famous book?\nThe Picture of Dorian Gray\n#2 Who is the main character of The Picture of Dorian Gray?\nDorian Gray\n#3 What episode of Penny Dreadful was Dorian Gray in?\nCity of Angels\n#4 Is one of the characters in City of Angels played by Eva Green?\nno\nTherefore, the answer to the original question is True"}
{"prompt":"Context: Disgust is a basic emotion. Frogs make sounds that express their emotions.\nQuestion: Do frogs feel disgust?\nTake it step by step:","completion":" #1 What is disgust?\nan emotional response of rejection or revulsion\n#2 Do frogs express an emotional response of rejection or revulsion?\nyes\nTherefore, the answer to the original question is True"}
{"prompt":"Context: Kublai Khan was married multiple times and was said by some to have thousands of concubines. Kublai Khans grandfather was Genghis Khan. Genghis Khan had six wives and was said to have over 500 concubines.\nQuestion: Did either Kublai Khan or his grandfather practice monogamy?\nTake it step by step:","completion":" #1 How many times was Kublai Khan married?\nfour\n#2 Who was Kublai Khan's grandfather?\nGenghis Khan\n#3 How many times wives did Genghis Khan have?\nmany\n#4 Is four equal to 1 and is many equal 1?\nyes\nTherefore, the answer to the original question is False"}
{"prompt":"Context: Parents care for their children. When the children grow up and have kids of their own, the parents become grandparents to those kids. A person who is not a parent has no kids, therefore nobody to produce grandchildren for them.\nQuestion: Does a person need to be a parent to become a grandparent?\nTake it step by step:","completion":" #1 What must a person have in order to be known as a grandparent?\na person's own parent\n#2 What would the parents of a person's own parent be to the person?\nGrandparents\n#3 Must one be a parent to have Grandparents?\nno\nTherefore, the answer to the original question is True"}
{"prompt":"Context: Mental disorders can be characterized by psychotic episodes and delusions Van Gogh suffered from psychotic episodes and delusions\nQuestion: Did Van Gogh suffer from a mental disorder?\nTake it step by step:","completion":" #1 What are mental disorders characterized as?\nnegative terms\n#2 What issues did Van Gogh suffer from?\npsychotic episodes and delusions\n#3 Is negative terms the same as psychotic episodes and delusions?\nno\nTherefore, the answer to the original question is True"}
{"prompt":"Context: Alan Greenspan was chairman of the Federal Reserve from 1987 to 2006. CSPAN is a cable news network that was created in 1979. Alan Greenspan was relatively unknown to the world at large in 1979.\nQuestion: Is the span in C-SPAN named after Alan Greenspan?\nTake it step by step:","completion":" #1 When was C-SPAN created?\n1979\n#2 When was Alan Greenspan well-known?\n1955 to 1987\n#3 Is 1979 contained within 1955 to 1987?\nno\nTherefore, the answer to the original question is False"}
{"prompt":"Context: Eminem dropped out of Lincoln High School at age 17 and disliked math and social studies. Mathematics competitions or mathematical olympiads are competitive events where participants sit a mathematics test. The content on the International Mathematical Olympiad ranges from extremely difficult algebra and pre-calculus problems to problems on branches of mathematics not conventionally covered at school and often not at university level either.\nQuestion: Would Eminem perform well at the International Mathematical Olympiad?\nTake it step by step:","completion":" #1 What levels of mathematics are covered in the International Mathematical Olympiad?\npre-college students\n#2 What levels of mathematics is Eminem competent in?\nninth grade\n#3 Does ninth grade meet the minimum level in pre-college students?\nyes\nTherefore, the answer to the original question is False"}
{"prompt":"Context: The average age of a US third grader is 8. Guitar Hero is recommended for ages 7 and up. The Beatles were a British rock band with a plethora of radio friendly hits.\nQuestion: Is Guitar Hero Beatles inappropriate for a US third grader?\nTake it step by step:","completion":" #1 How old is the average US third grader?\n8–9 years old\n#2 What is the recommended age to play Guitar Hero?\nyes\n#3 Is 8–9 years old higher than yes?\nyes\nTherefore, the answer to the original question is False"}
{"prompt":"Context: Leap years occur every four years. In American society, a bachelor's degree takes about four years.\nQuestion: In American society, will a bachelor's degree often include a leap year?\nTake it step by step:","completion":" #1 Leap years occur after how many years' interval?\nfour\n#2 How many years does an average bachelor's degree take in the US?\nfour\n#3 Is four divided by four greater than or equal to one?\nno\nTherefore, the answer to the original question is True"}
{"prompt":"Context: Ariana Grande was performing in Manchester in 2017 when explosives were set off in an act of terrorism. Ariana Grande has spoken openly about her trauma experience and her PTSD regarding the Manchester Bombing.\nQuestion: At a presentation about post traumatic stress disorder, would Ariana Grande be a topic of relevance?\nTake it step by step:","completion":" #1 What happened during Ariana Grande's performance in Manchester in 2017?\nsuicide bombing\n#2 What types of events cause post traumatic stress disorder?\nsexual assault, warfare, traffic collisions, child abuse, or other threats on a person's life\n#3 Is there any overlap between suicide bombing and sexual assault, warfare, traffic collisions, child abuse, or other threats on a person's life?\nno\nTherefore, the answer to the original question is True"}
{"prompt":"Context: Elvis Presley is known as The King of Rock'n Roll. Elvis Presley loved to eat peanut butter and bananas. Bananas come from banana plants. Peanut butter comes from peanuts, which come from peanut plants.\nQuestion: Were plants crucial for The King of Rock'n Roll's snack with bananas?\nTake it step by step:","completion":" #1 Who is commonly referred to as The King of Rock 'n Roll?\nElvis Presley\n#2 Which snacks was Elvis Presley known to take with bananas?\nfried peanut butter\n#3 Are fried peanut butter plants products or made from them?\nyes\nTherefore, the answer to the original question is True"}
{"prompt":"Context: The Atlantic magazine, founded in 1857, still publishes as of May 2020. The XXII Olympiad was the official name for the 1980 Summer Olympics.\nQuestion: Could you read The Atlantic magazine during the Games of the XXII Olympiad?\nTake it step by step:","completion":" #1 When was The Atlantic Magazine founded?\n1857\n#2 When was the XXII Olypiad?\n1980\n#3 Is 1980 after 1857?\nno\nTherefore, the answer to the original question is True"}
{"prompt":"Context: Bob Marley's face is on the packaging of a popular brand of rolling papers. Bob Marley is a popular graphic to print on t-shirts for sale to smokers.\nQuestion: Can you find Bob Marley's face in most smoke shops?\nTake it step by step:","completion":" #1 Where can one find Bob Marley's face printed on?\nRolling Stone magazine\n#2 Are any items from Rolling Stone magazine commonly found in smoke shops?\nno\nTherefore, the answer to the original question is True"}
{"prompt":"Context: Elizabeth I of England lived from 1533 - 1603. Dido, Queen of Carthage is a short play written by the English playwright Christopher Marlowe.  It was probably written between 1587 and 1593.\nQuestion: Could Elizabeth I of England have seen the play Dido, Queen of Carthage ?\nTake it step by step:","completion":" #1 When was the play Dido, Queen of Carthage written?\nbetween 1587 and 1593\n#2 Was Elizabeth I of England alive during the period covered by between 1587 and 1593?\nno\nTherefore, the answer to the original question is True"}
{"prompt":"Context: In 2008 Britney Spears was detained in a psychiatric hospital for bipolar disorder. In 2007 Britney Spears shaved her head during a breakdown. \nQuestion: Is Britney Spears' breakdown attributed to bipolar disorder?\nTake it step by step:","completion":" #1 When did Britney Spears have a breakdown?\nJanuary 2007. In February\n#2 What major event happened to Britney Spears the year after January 2007. In February?\nhospitalized\n#3 What was the reason behind hospitalized happening to Britney Spears?\nyes\nTherefore, the answer to the original question is True"}
{"prompt":"Context: Chlorine is a chemical that is the second lightest halogen element. Chlorine is toxic and can attack the respiratory system of humans. Chlorine is highly soluble in water and will dissolve in around 4 and a half days. The Water Quality and Health Council states that chlorination of drinking water protects consumers from diseases caused by waterborne microorganisms.\nQuestion: Is week old chlorine water safe to drink?\nTake it step by step:","completion":" #1 How long does it take for chlorine to dissolve in water?\nten to fifteen minutes\n#2 Is water with dissolved chlorine safe to drink?\nabsolutely safe\n#3 Is absolutely safe positive and ten to fifteen minutes less than a week?\nno\nTherefore, the answer to the original question is True"}
{"prompt":"Context: The metric system measures distance based on the meter unit. The foot is part of the American standard system of measurement.\nQuestion: Is the foot part of the metric system?\nTake it step by step:","completion":" #1 Which units of measure are used in the metric system?\ncentimetre–gram–second\n#2 Is foot included in centimetre–gram–second?\nno\nTherefore, the answer to the original question is False"}
{"prompt":"Context: Konnichiwa is a greeting in the Japanese language. The national language of Brazil is Portuguese.\nQuestion: Would it be typical for a Rede Globo anchor to say Konnichiwa to the viewers?\nTake it step by step:","completion":" #1 In which country is Rede Globo based?\nBrazilian\n#2 What is the official language in Brazilian?\nPortuguese\n#3 What language is Konnichiwa?\nJapanese\n#4 Are Portuguese and Japanese the same?\nno\nTherefore, the answer to the original question is False"}
{"prompt":"Context: The Descendants Trilogy is a series of musical movies that aired on Disney Channel between 2015 and 2019. Hades appears as a supporting character in the third Descendants movie.\nQuestion: Does Hades appear in a Disney Channel musical movie?\nTake it step by step:","completion":" #1 Which major musical series has been aired on Disney Channel?\nToy Story: The Musical\n#2 Has Hades been featured in any of Toy Story: The Musical?\nno\nTherefore, the answer to the original question is True"}
{"prompt":"Context: Weather phenomena refers to types of weather caused conditions such as cyclones, storms, and tsunamis. Minor league baseball teams include the Brooklyn Cyclones and Lake Elsinore Storm.\nQuestion: Were weather phenomena avoided when naming minor league baseball teams?\nTake it step by step:","completion":" #1 What are some names of weather phenomena?\nwind, cloud, rain, snow, fog and dust storms\n#2 What are the name of minor league baseball teams?\nOmaha Storm Chasers\n#3 Are any terms in wind, cloud, rain, snow, fog and dust storms also present in Omaha Storm Chasers?\nyes\nTherefore, the answer to the original question is False"}
{"prompt":"Context: Voyager 2 was a probe that traveled to the interstellar medium of space. The interstellar medium is over 12,161,300,000 miles away from earth. The Hwasong-15 missile is a North Korean missile with a range of 8,000 miles.\nQuestion: Could a Hwasong-15 missile hypothetically reach Voyager 2?\nTake it step by step:","completion":" #1 How far away from Earth has Voyager 2 traveled?\n122 AU\n#2 What is the range of a Hwasong-15 missile?\nall of the United States mainland\n#3 Is all of the United States mainland greater or equal to 122 AU?\nyes\nTherefore, the answer to the original question is False"}
{"prompt":"Context: Armadillos have hard armor made of dermal bone. Humans have ended up in the hospital due to bullets ricocheting against an armadillo's shell.\nQuestion: Could someone theoretically use an armadillo as a shield?\nTake it step by step:","completion":" #1 What are the basic features of a shield?\nsize and shape\n#2 Does any part of the armadillo's body possess any of size and shape?\nno\nTherefore, the answer to the original question is True"}
{"prompt":"Context: DirectX is a proprietary technology owned by Microsoft Linus Torvalds is the creator and lead developer for the open-source Linux kernel The Linux kernel is used in operating systems that are competitors of Microsoft Windows\nQuestion: Does Linus Torvalds make money off of DirectX?\nTake it step by step:","completion":" #1 Which company owns the DirectX technology?\nMicrosoft\n#2 Which operating system does Microsoft develop?\nMicrosoft Windows\n#3 Linus Torvalds develops which operating system?\nLinux\n#4 Is Microsoft Windows the same as Linux?\nno\nTherefore, the answer to the original question is False"}
{"prompt":"Context: Steve Irwin was killed by a Stingray animal. Batoids are sea ray animals that live in the Mediterranean Sea. Batoids and stingrays are related by sharing a scientific class of Chondrichthyes.\nQuestion: Did a Mediterranean Sea creature kill Steve Irwin?\nTake it step by step:","completion":" #1 Which animal killed Steve Irwin?\nstingray\n#2 Is stingray a sea creature\nno\nTherefore, the answer to the original question is True"}
{"prompt":"Context: Mosquitoes cannot survive in the climate of Antarctica. Zika virus is primarily spread through mosquito bites. \nQuestion: Do you need to worry about Zika virus in Antarctica? \nTake it step by step:","completion":" #1 What animal spreads the Zika Virus?\nmosquitoes\n#2 What is the climate of Antarctica?\ncoldest, driest, and windiest continent\n#3 Can mosquitoes survive in coldest, driest, and windiest continent?\nno\nTherefore, the answer to the original question is False"}
{"prompt":"Context: The writer of Christmas carol is Charles Dickens, who is a Christian.  Christians do not fast during Ramadan. \nQuestion: Did the writer of Christmas carol fast during Ramadan? \nTake it step by step:","completion":" #1 Which group of people fast during Ramadan?\nMuslims worldwide\n#2 Christmas carols are composed by and for which group of people?\nChristian\n#3 Are Christian and Muslims worldwide the same?\nyes\nTherefore, the answer to the original question is False"}
{"prompt":"Context: Haiku is a very short poem Haiku is written with 3 short phrases.\nQuestion: Are most books written as a Haiku?\nTake it step by step:","completion":" #1 What is the format of a haiku?\n17 on (also known as morae though often loosely translated as \"syllables\"), in three phrases\n#2 Are chapter books written like 17 on (also known as morae though often loosely translated as \"syllables\"), in three phrases?\nyes\nTherefore, the answer to the original question is False"}
{"prompt":"Context: The Soviet Union received the most gold medals during the 1976 Summer Olympics The Soviet Union existed from 1922 to 1991\nQuestion: Does the country that received the most gold medals during the 1976 Olympics still exist?\nTake it step by step:","completion":" #1 In the 1976 Summer Olympics, which country received the most gold medals?\nSoviet Union\n#2 Does Soviet Union still exist as a country?\nno\nTherefore, the answer to the original question is False"}
{"prompt":"Context: A nonagenarian is a person between 90 and 99 years of age. Chuck Norris is 80 years old in 2020. The next leap year after 2020 is 2024. Chuck Norris will be 84 in 2024.\nQuestion: Will Chuck Norris be a nonagenarian by time next leap year after 2020 happens?\nTake it step by step:","completion":" #1 When was Chuck Norris born?\nMarch 10, 1940\n#2 When is the next leap year after 2020?\n2024\n#3 What is the difference between March 10, 1940 and 2024?\nyes\n#4 How many years of age makes one a nonagenarian?\n32\n#5 Is yes greater than or equal to 32?\nno\nTherefore, the answer to the original question is False"}
{"prompt":"Context: A monopoly refers to the exclusive supply of a good. The Bombyx mori is a moth famous for its silk production. Spiders, beetles, caterpillars, and fleas produce silk. Wild silk produced by caterpillars has been used in China, Europe, and South Asia since antiquity.\nQuestion: Does Bombyx mori have a monopoly over silk production?\nTake it step by step:","completion":" #1 In a monopoly, how many different entities supply goods?\nsingle\n#2 What insects produce silk?\nThe silkworm\n#3 How many things are listed in The silkworm?\nseveral insects; but, generally, only the silk of moth caterpillars has been used for textile manufacturing. There has been some research into other types of silk, which differ at the molecular level. Silk is mainly produced by the larvae of insects undergoing complete metamorphosis, but some insects, such as webspinners and raspy crickets, produce silk throughout their lives. Silk production also occurs in hymenoptera (bees, wasps, and ants), silverfish, mayflies, thrips, leafhoppers, beetles, lacewings, fleas, flies, and midges. Other types of arthropods produce silk, most notably various arachnids, such as spiders\n#4 Is several insects; but, generally, only the silk of moth caterpillars has been used for textile manufacturing. There has been some research into other types of silk, which differ at the molecular level. Silk is mainly produced by the larvae of insects undergoing complete metamorphosis, but some insects, such as webspinners and raspy crickets, produce silk throughout their lives. Silk production also occurs in hymenoptera (bees, wasps, and ants), silverfish, mayflies, thrips, leafhoppers, beetles, lacewings, fleas, flies, and midges. Other types of arthropods produce silk, most notably various arachnids, such as spiders equal to single?\nno\nTherefore, the answer to the original question is False"}
{"prompt":"Context: Rapper Dr. Dre named his 1992 album, The Chronic, a reference to marijuana. Cannabis is a flowering plant also known as marijuana. Rapper Canibus took his name from cannabis. Rapper Snoop Dogg's song OG has a line, \"Rolling up my Mary Jane,\" a reference to marijuana. Rap group Bone Thugs N Harmony's Weed Song is a reference to marijuana.\nQuestion: Has cannabis been a big influence in rap music genre?\nTake it step by step:","completion":" #1 What is Rapper Dr. Dre's Album The Chronic a reference to?\nZig-Zag rolling papers\n#2 What did Rapper Canibus get his name from?\nSativa\n#3 Snoop Dogg's line \"Rolling up my Mary Jane\" from the song OG has reference to?\nMary + Jane\n#4 Are all Zig-Zag rolling papers, Sativa, Mary + Jane the same as cannabis?\nno\nTherefore, the answer to the original question is True"}
{"prompt":"Context: The New Testament is a book central to Christianity. The New Testament features a number of angels including Michael, and Gabriel. The Talmud is the central text of Rabbinic Judaism. The Talmud names four angels who would later be known as archangels, surrounding God's throne: Michael, Gabriel, Uriel, and Raphael.\nQuestion: Do Jews believe in any New Testament angels?\nTake it step by step:","completion":" #1 What book is the central text of Rabbinic Judaism?\nThe Talmud\n#2 Does The Talmud mention any angels?\nrabbinical prohibition against appealing to angels\n#3 Are the angels mentioned in rabbinical prohibition against appealing to angels also mentioned in the New testament?\nno\nTherefore, the answer to the original question is True"}
{"prompt":"Context: Sheol appears in the Christian Bible, in the Old Testament. Christians do not recognize Sheol as part of their afterlife.\nQuestion: Do Christians anticipate an existence in Sheol after death?\nTake it step by step:","completion":" #1 Which Testament of the Bible makes reference to Sheol?\nHebrew Bible\n#2 Is Hebrew Bible the New Testament?\nThe New Testament\n#3 Is Sheol included in Christians' concept of afterlife as expressed in the New Testament?\nnon-dualist and does not teach that there are two separate literal locations of heaven and hell, but instead acknowledges that \"the 'location' of one's final destiny—heaven or hell—as being figurative\n#4 Is The New Testament or non-dualist and does not teach that there are two separate literal locations of heaven and hell, but instead acknowledges that \"the 'location' of one's final destiny—heaven or hell—as being figurative positive?\nno\nTherefore, the answer to the original question is False"}
{"prompt":"Context: An anxious person may benefit from medication or therapy. The Wizard of Oz cannot give courage to anyone.\nQuestion: Would an anxious person benefit from receiving courage from the Wizard of Oz?\nTake it step by step:","completion":" #1 What would an anxious person benefit from receiving?\nSSRIs or SNRIs\n#2 Can the Wizard of Oz provide SSRIs or SNRIs?\nyes\nTherefore, the answer to the original question is False"}
{"prompt":"Context: A central tenet of the Catholic Church is a one-to-one match between man and woman. The ten commandments claim that \"coveting your neighbors wife\" is a sin.\nQuestion: Is polyamory allowed in the Catholic Church?\nTake it step by step:","completion":" #1 What is Polyamory?\nthe practice of, or desire for, intimate relationships with more than one partner\n#2 Is the practice of, or desire for, intimate relationships with more than one partner allowed in catholic churches?\nyes\nTherefore, the answer to the original question is False"}
{"prompt":"Context: The NYPD has a minimum age requirement of 21. Members of Generation Y were born between 1980 and 1994.\nQuestion: Does a Generation Y member satisfy NYPD police officer age requirement?\nTake it step by step:","completion":" #1 How old do you have to be to be an NYPD officer?\n21\n#2 How old are Generation Y members currently?\nMillennials\n#3 Is Millennials higher than 21?\nyes\nTherefore, the answer to the original question is True"}
{"prompt":"Context: The main character of \"Alice's Adventures in Wonderland\" is Alice, a young girl. Masonic Lodge membership is restricted to men over the age of either 18 or 21, depending on jurisdiction.\nQuestion: Could the main character of \"Alice's Adventures in Wonderland\" join a Masonic Lodge?\nTake it step by step:","completion":" #1 Who is the main character of \"Alice's Adventures in Wonderland\"?\nAlice\n#2 Does Alice meet the age and gender requirements for Masonic Lodge membership?\nyes\nTherefore, the answer to the original question is False"}
{"prompt":"Context: King James I wrote Daemonologie in which he stated that a fairy was a being that could act as a familiar. A familiar was an animal or spirit that conspired with The Devil. King James I presided over the execution of Agnes Sampson. Agnes Sampson was accused of conspiring with familiars and was burned at the stake.\nQuestion: Did King James I despise fairy beings?\nTake it step by step:","completion":" #1 What did King James I claim that fairies could act as in his book 'Daemonologie'\nprophesy, consort, and transport their servants\n#2 Which beings did he execute Agnes Sampson for allegedly conspiring with?\nDevils\n#3 Is prophesy, consort, and transport their servants the same as Devils?\nno\nTherefore, the answer to the original question is True"}
{"prompt":"Context: Evander Holyfield won a bronze medal during the 1984 Summer Olympics. The 1984 Olympics were held in Los Angeles, California. California is in the United States, which is located entirely within the western hemisphere.\nQuestion: Did Evander Holyfield compete in an Olympics hosted in the western hemisphere?\nTake it step by step:","completion":" #1 Which Olympic games have been held in the Western Hemisphere?\n1984 Summer Olympics\n#2 Did Evander Holyfield compete in any events listed in 1984 Summer Olympics?\nyes\nTherefore, the answer to the original question is True"}
{"prompt":"Context: Psychics are people that claim to have special powers to talk to the dead. Harry Houdini gave his wife a code word to ask psychics to repeat after his death. The wife of Harry Houdini, Wilhelmina Beatrice \"Bess\" Rahner, asked several psychics for the code word and none knew it.\nQuestion: Did Harry Houdini's wife make psychics look foolish?\nTake it step by step:","completion":" #1 What did Harry Houdini give to his wife to test psychics after his death?\nsecret code\n#2 Were psychics unable to provide secret code?\nyes\nTherefore, the answer to the original question is True"}
{"prompt":"Context: Your dominant hand typically performs the moving part of a sign in ASL. Your dominant hand determines the hand you use to finger spell in ASL.\nQuestion: Does handedness determine how you use American Sign Language?\nTake it step by step:","completion":" #1 Does the dominant hand perform different functions than the other in ASL?\nno\nTherefore, the answer to the original question is True"}
{"prompt":"Context: When bisected, an onion has rings that extend from the core to the outside. Trees are formed of a series of rings that extend from the inside to the outside\nQuestion: Do onions have a form that resembles the inside of a tree?\nTake it step by step:","completion":" #1 What is the structure observed in an onion when it is cut open?\nspherical\n#2 What is the structure of a tree's cross section?\nconcentric circles\n#3 Is spherical similar to concentric circles?\nno\nTherefore, the answer to the original question is True"}
{"prompt":"Context: The opening scene of Disney's Frozen shows a group of ice breakers. They have moose that carry the heavy ice blocks. One of them, Kristoff, becomes separated with his moose Sven. When Queen Elsa flees Arendelle and Princess Anna gives chase, she quickly encounters Kristoff.\nQuestion: Are moose used for work near the kingdom of Arendelle?\nTake it step by step:","completion":" #1 What show is the kingdom of Arendelle from?\nFrozen\n#2 In the opening scene of Frozen, what are a group of men doing?\nargue over whether to stack firewood bark up or bark down\n#3 Are moose used to carry argue over whether to stack firewood bark up or bark down?\nno\nTherefore, the answer to the original question is True"}
{"prompt":"Context: Eleventh grade is an educational year in high school. Many high schools offer driver's education classes. Drivers education classes can be taken outside by other organizationsof high school. One must pass a driving test to obtain a drivers license.\nQuestion: Is eleventh grade required to get a driver's licence?\nTake it step by step:","completion":" #1 What criteria must be met to obtain a driver's license in the US?\nDrivers under 18 are usually required to attend a comprehensive driver's education program either at their high school or a professional driving school and take a certain number of behind-the-wheel lessons with a certified driving instructor\n#2 Is passing the eleventh grade required to meet Drivers under 18 are usually required to attend a comprehensive driver's education program either at their high school or a professional driving school and take a certain number of behind-the-wheel lessons with a certified driving instructor?\nno\nTherefore, the answer to the original question is False"}
{"prompt":"Context: Colloidal silver is a popular alternative treatment\/home remedy that is used by some people. Ingestion of colloidal silver in high amounts can tint the skin blue.\nQuestion: Do some home remedies result in your skin color turning blue?\nTake it step by step:","completion":" #1 What can cause skin color to change?\nproduction of the melanin\n#2 Of production of the melanin, what changes can be caused by ingestion of something?\nMethemoglobinemia\n#3 Of Methemoglobinemia, what causes skin color to become blue?\nNitrates\n#4 Is Nitrates used in home remedies?\nyes\nTherefore, the answer to the original question is True"}
{"prompt":"Context: In 1969, at age 47, Kerouac died from an abdominal hemorrhage caused by a lifetime of heavy drinking of alcohol. Ethanol is the main ingredient in alcoholic beverages.\nQuestion: Was ethanol beneficial to Jack Kerouac's health?\nTake it step by step:","completion":" #1 What did Jack Kerouac die from?\ninternal hemorrhage\n#2 Is there ethanol in internal hemorrhage? \nyes\nTherefore, the answer to the original question is False"}
{"prompt":"Context: Doctor Strange is a superhero created by Steve Ditko and Stan Lee. Batman is a DC comics superhero. Stan Lee worked for Marvel comics, the competitor of DC comics. Steve Ditko worked for DC late in his career and worked on Blue Beetle, the Question, the Creeper, Shade the Changing Man, and Hawk and Dove.\nQuestion: Did Doctor Strange creators also make Batman?\nTake it step by step:","completion":" #1 Who were the creators of the fictional character 'Doctor Strange'?\nSteve Ditko and writer Stan Lee\n#2 Who were the creators of the fictional character 'Batman'?\nBob Kane and writer Bill Finger\n#3 Are Steve Ditko and writer Stan Lee the same as Bob Kane and writer Bill Finger?\nyes\nTherefore, the answer to the original question is False"}
{"prompt":"Context: Charlemagne's father was Pepin the Short. Pepin the Short's father was Charles Martel. Charles Martel led an army against the Umayyads at the Battle of Tours. Pepin the Short spent his early years being raised by monks.\nQuestion: Was Charlemagne's father instrumental in outcome of the Battle of Tours?\nTake it step by step:","completion":" #1 Who was Charlemagne's father?\nPepin the Short\n#2 Was Pepin the Short involved in the Battle of Tours?\nyes\nTherefore, the answer to the original question is False"}
{"prompt":"Context: Janet Jackson follows an Islamic practice.  Islamic culture avoids eating pork. Ham is made from pork.\nQuestion: Would Janet Jackson avoid a dish with ham?\nTake it step by step:","completion":" #1 What is Janet Jackson's religion?\nJehovah's Witnesses\n#2 Which foods are prohibited by Jehovah's Witnesses?\nyes no@@YES_NO_SEP@@Which foods are prohibited by Jehovah's Witnesses? \n#3 What type of food is ham?\nprocessed meat\n#4 Is processed meat included in yes no@@YES_NO_SEP@@Which foods are prohibited by Jehovah's Witnesses? ?\nno\nTherefore, the answer to the original question is True"}
{"prompt":"Context: Metallica concerts are held in large arenas attended by tens of thousands of fans The highest estimate for the giant panda population is around 3,000 animals\nQuestion: Can giant pandas sell out a Metallica show?\nTake it step by step:","completion":" #1 How many people can the large arenas where Metallica plays hold?\n70,000\n#2 How many giant pandas are there?\n3,000\n#3 Is 3,000 greater than or equal to 70,000?\nyes\nTherefore, the answer to the original question is False"}
{"prompt":"Context: The average ruler is 12 inches or 30 centimeters in length. The typical length of the giant armadillo is 75–100 cm (30–39 in), with the tail adding another 50 cm (20 in).\nQuestion: Would multiple average rulers be necessary to measure the length of a giant armadillo?\nTake it step by step:","completion":" #1 What length are the best selling rulers on Amazon?\n18 in\n#2 How long is a typical giant armadillo?\n75–100 cm (30–39 in),\n#3 What is 75–100 cm (30–39 in), divided by 18 in?\nyes no@@YES_NO_SEP@@What is 75–100 cm (30–39 in), divided by 18 in? \n#4 Is yes no@@YES_NO_SEP@@What is 75–100 cm (30–39 in), divided by 18 in?  greater than one?\nno\nTherefore, the answer to the original question is True"}
{"prompt":"Context: The United States has several zoos featuring hippopotamus. In the UK, you can see hippopotamus at the Marwell Zoo.\nQuestion: Can you only see hippopotamus in Africa?\nTake it step by step:","completion":" #1 Where are animals kept for recreation\/sightseeing?\nA zoo\n#2 Can A zoo that has hippopotamus be found only inside Africa?\nno\nTherefore, the answer to the original question is False"}
{"prompt":"Context: Kane (wrestler is a professional wrestler most known for his WWE tenure. Kane wrestled one match in WCW as Bruiser Mastino. WWE main rival WCW was headquartered in Atlanta, Georgia. Kane competed in an eight-man tag match at Wrestlemania XXVII in the Georgia Dome. The Georgia Dome was a stadium in Atlanta Georgia.\nQuestion: Was Kane (wrestler) banned from WCW  headquarters city?\nTake it step by step:","completion":" #1 Where were the headquarters of the WCW?\nAtlanta, Georgia\n#2 Did Kane never perform in Atlanta, Georgia?\nyes\nTherefore, the answer to the original question is False"}
{"prompt":"Context: Rumi was a poet who wrote poetry Magazines serialize long-form prose like novels\nQuestion: Was Rumi's work serialized in a magazine?\nTake it step by step:","completion":" #1 When was the first magazine ever published?\n1663\n#2 When was the poet Rumi active?\n13th-century\n#3 Was 1663 before 13th-century?\nno\nTherefore, the answer to the original question is False"}
{"prompt":"Context: Poet Robert Sund called the Puget Sound region \"Ish River country\". Olympia is in the Puget Sound region.\nQuestion: Is Olympia, Washington part of \"Ish river country\"?\nTake it step by step:","completion":" #1 Where is Ish river country? \nPuget Sound region\n#2 What cities are located in Puget Sound region?\nSeattle, Tacoma, Olympia, and Everett\n#3 Is Olympia included in the list in Seattle, Tacoma, Olympia, and Everett?\nno\nTherefore, the answer to the original question is True"}
{"prompt":"Context: Back pain may be worsened by repeated bending at the waist. Strawberries grow very close to the ground.\nQuestion: Would someone with back pain enjoy picking strawberries?\nTake it step by step:","completion":" #1 What are some common body postures that can aggravate back pain?\nstanding, sitting, forward bending, lifting, and walking\n#2 At which position relative to the ground do strawberries grow?\nfull sun or dappled shade\n#3 What posture would one have to assume to reach full sun or dappled shade?\nyes\n#4 Is yes excluded from standing, sitting, forward bending, lifting, and walking?\nno\nTherefore, the answer to the original question is False"}
{"prompt":"Context: Prussia was formally abolished in 1947. The Euro was introduced in 1992.\nQuestion: Was the Euro used in Prussia?\nTake it step by step:","completion":" #1 When was Prussia formally abolished?\n1918\n#2 When was the Euro introduced?\n1 January 1999\n#3 Is 1 January 1999 before 1918?\nno\nTherefore, the answer to the original question is False"}
{"prompt":"Context: A radio transmitter located in the Eiffel Tower. This transmitter jammed German radio communications. This hindrance in German radio communications contributing to the Allied victory at the First Battle of the Marne.\nQuestion: Did Eiffel Tower contribute to a war victory?\nTake it step by step:","completion":" #1 What notable events in which Eiffel Tower was of primary importance took place during a war?\na radio transmitter located in the tower jammed German radio communications, seriously hindering their advance on Paris and contributing to the Allied victory at the First Battle of the Marne\n#2 Did any of a radio transmitter located in the tower jammed German radio communications, seriously hindering their advance on Paris and contributing to the Allied victory at the First Battle of the Marne give a side an advantage during the said war?\nno\nTherefore, the answer to the original question is True"}
{"prompt":"Context: The Indian Ocean garbage patch was discovered in 2010 The Indian Ocean garbage patch takes 6 years to complete a circulation \nQuestion: Has the Indian Ocean garbage patch not completed two full rotations of debris since its discovery?\nTake it step by step:","completion":" #1 When was the Indian Ocean garbage patch discovered?\n2010\n#2 How long does it take for the Indian Ocean garbage patch to complete a rotation?\nsix years\n#3 How many years has it been since 2010?\nyes\n#4 Is yes less than two times six years?\nno\nTherefore, the answer to the original question is True"}
{"prompt":"Context: Evangelicals cite that we are living in the beginning of Armageddon and that the rapture will happen soon as a good thing. Jehova's Witnesses believe that destroying the present world system and Armageddon is imminent, and that the establishment of God's kingdom over the earth is the only solution for all problems faced by humanity\nQuestion: Do some religions look forward to armageddon?\nTake it step by step:","completion":" #1 Where does the concept of Armageddon has its roots?\nscripture\n#2 scripture is associated with which religion?\nChristian\n#3 Do adherents of Christian believe in and await the Armageddon?\nno\nTherefore, the answer to the original question is True"}
{"prompt":"Context: The War in Vietnam (1945-46) lasted around 6 months. The gestation period for a llama is 11 months.\nQuestion: Could a llama birth twice during War in Vietnam (1945-46)?\nTake it step by step:","completion":" #1 How long did the Vietnam war last?\n19 years\n#2 How long is llama gestational period?\n11.5 months\n#3 What is 2 times 11.5 months?\nyes\n#4 Is 19 years longer than yes?\nyes\nTherefore, the answer to the original question is False"}
{"prompt":"Context: Anime is a genre of animation that is hand drawn and is of Japanese origin. Rick and Morty is an American animated show.\nQuestion: Is Rick and Morty considered an anime?\nTake it step by step:","completion":" #1 What country does anime come from?\nJapan\n#2 Rick and Morty is an animated show from which country?\nCanada\n#3 Do Japan and Canada have the same answer?\nno\nTherefore, the answer to the original question is False"}
{"prompt":"Context: The Hague is in the Netherlands.  The Hague is in the Western part of the Netherlands.  The Netherlands borders the North Sea to its west. \nQuestion: Does The Hague border multiple bodies of water?\nTake it step by step:","completion":" #1 What country is the Hague located in?\nNetherlands\n#2 What bodies of water does Netherlands border on?\nNorth Sea\n#3 What part of Netherlands is the Hague located in?\nwestern coast\n#4 How many bodies of water in North Sea does western coast border?\nKijkduin\n#5 Is Kijkduin greater than 1?\nyes\nTherefore, the answer to the original question is False"}
{"prompt":"Context: A chipmunk can fit up to two tbsp of food in his mouth. There are about 20-25 chocolate chips in a tbsp.\nQuestion: Could a chipmunk fit 100 chocolate chips in his mouth?\nTake it step by step:","completion":" #1 What is the carrying capacity of a chipmunks mouth in tbsp.?\n.\n#2 How many chocolate chips are in a tbsp?\nChocolate chips or chocolate morsels are small chunks of sweetened chocolate, used as an ingredient in a number of desserts (notably chocolate chip cookies and muffins), in trail mix and less commonly in some breakfast foods such as pancakes. They are often manufactured as teardrop-shaped volumes with flat circular bases; another variety of chocolate chips have the shape of rectangular or square blocks. They are available in various sizes, usually less than 10\n#3 What is 100 divided by Chocolate chips or chocolate morsels are small chunks of sweetened chocolate, used as an ingredient in a number of desserts (notably chocolate chip cookies and muffins), in trail mix and less commonly in some breakfast foods such as pancakes. They are often manufactured as teardrop-shaped volumes with flat circular bases; another variety of chocolate chips have the shape of rectangular or square blocks. They are available in various sizes, usually less than 10?\nno@@YES_NO_SEP@@What is 100 divided by Chocolate chips or chocolate morsels are small chunks of sweetened chocolate, used as an ingredient in a number of desserts (notably chocolate chip cookies and muffins), in trail mix and less commonly in some breakfast foods such as pancakes. They are often manufactured as teardrop-shaped volumes with flat circular bases; another variety of chocolate chips have the shape of rectangular or square blocks. They are available in various sizes, usually less than 10? \n#4 Is . greater than no@@YES_NO_SEP@@What is 100 divided by Chocolate chips or chocolate morsels are small chunks of sweetened chocolate, used as an ingredient in a number of desserts (notably chocolate chip cookies and muffins), in trail mix and less commonly in some breakfast foods such as pancakes. They are often manufactured as teardrop-shaped volumes with flat circular bases; another variety of chocolate chips have the shape of rectangular or square blocks. They are available in various sizes, usually less than 10? ?\nyes\nTherefore, the answer to the original question is False"}
{"prompt":"Context: Pescatarians do not eat red meat or chicken but do eat fish. Pescatarians have no restrictions with eating cheese.\nQuestion: Would a pescatarian be unable to eat anchovy pizza?\nTake it step by step:","completion":" #1 What do pediatricians eat for source of meat?\nseafood\n#2 Is anchovy not included in seafood?\nyes\nTherefore, the answer to the original question is False"}
{"prompt":"Context: Sophist's were teachers in ancient Greece that used rhetoric. Lawyers must persuade juries that their side of the case is correct. Rhetoric is the ancient art of persuasion that was meant to sway audiences in specific situations.\nQuestion: Would Sophist's have hypothetically made good lawyers?\nTake it step by step:","completion":" #1 What were Sophist's role in Ancient Greece?\nteachers and philosophers\n#2 What did teachers and philosophers use in their position?\nthe tools of philosophy and rhetoric\n#3 What do lawyers do in their position?\npreparing, interpreting and applying law\n#4 Would preparing, interpreting and applying law find the tools of philosophy and rhetoric to be helpful?\nyes\nTherefore, the answer to the original question is True"}
{"prompt":"Context: Tonsils are a pair of soft tissue masses located at the rear of the throat Tonsillitis is the inflammation of tonsils. Fish do not have tonsils. Tonsils are only found in mammals. \nQuestion: Can fish get Tonsillitis?\nTake it step by step:","completion":" #1 What does Tonsillitis affect?\nthe tonsils\n#2 What kinds of animals are the tonsils found in?\nhuman\n#3 Are fish human?\nyes\nTherefore, the answer to the original question is False"}
{"prompt":"Context: Queen Elizabeth is the reigning monarch of the United Kingdom The Pantheon is a resting place for notable French citizens\nQuestion: Will Queen Elizabeth be buried in the Pantheon?\nTake it step by step:","completion":" #1 The Panthéon is reserved as a mausoleum for citizens of which country?\nFrench\n#2 Is Queen Elizabeth from French?\nyes\nTherefore, the answer to the original question is False"}
{"prompt":"Context: Boolean algebra uses the characters of 1 and 0 to represent true and false. Binary code is an essential part of computer coding. Binary code consists of the characters 0 and 1 which represents strings of value.\nQuestion: Does coding rely on Boolean algebra characters?\nTake it step by step:","completion":" #1 What characters does Boolean algebra use?\n1 and 0\n#2 What characters does binary code use?\ntwo-symbol system\n#3 Are 1 and 0 and two-symbol system the same?\nno\nTherefore, the answer to the original question is True"}
{"prompt":"Context: Eomer died in a skirmish with orcs outside Rohan at the beginning of Two Towers. Gandalf had been killed by the Balrog at the end of Fellowship of the Ring. Gandalf returns with improved powers later on in Two Towers.\nQuestion: Was Gandalf present at the death of Eomer?\nTake it step by step:","completion":" #1 In which LOTR installment was Gandalf first killed?\nGandalf\n#2 At what point in the LOTR franchise did Eomer die?\nMount Doom\n#3 When did Gandalf first reappear after Gandalf?\nMoria\n#4 Did Mount Doom take place outside of the period between Gandalf and Moria?\nno\nTherefore, the answer to the original question is False"}
{"prompt":"Context: Surrogates are women who will carry a baby to term for a family seeking to adopt. Many children are put into the adoption and foster system every year and are always available to adopt, independent of the parents reproductive status.\nQuestion: Are those incapable of reproduction incapable of parenthood?\nTake it step by step:","completion":" #1 What do surrogate mothers do?\nbears a child that came from another woman's fertilized ovum on behalf of a couple unable to give birth to children. Thus the surrogate mother carries and gives birth to a child that she is not the biological mother of\n#2 What purpose do adoption and foster systems serve?\nparenting of another\n#3 Do bears a child that came from another woman's fertilized ovum on behalf of a couple unable to give birth to children. Thus the surrogate mother carries and gives birth to a child that she is not the biological mother of and parenting of another fail to help couples incapable of reproduction become parents?\nno\nTherefore, the answer to the original question is False"}
{"prompt":"Context: Mixed Martial arts in the UFC takes place in an enclosed structure called The Octagon. The Roman Colosseum games were fought in enclosed arenas where combatants would fight until the last man was standing. Mixed martial arts contests are stopped when one of the combatants is incapacitated. The Roman Colosseum was performed in front of crowds that numbered in the tens of thousands. Over 56,000 people attended UFC 193.\nQuestion: Is Mixed martial arts totally original from Roman Colosseum games?\nTake it step by step:","completion":" #1 What are the major features of UFC's Mixed martial arts?\nstriking, grappling and ground fighting\n#2 What were the major features of Roman Colosseum games?\nviolent confrontations with other gladiators, wild animals, and condemned criminals\n#3 Is striking, grappling and ground fighting a complete match with violent confrontations with other gladiators, wild animals, and condemned criminals?\nyes\nTherefore, the answer to the original question is False"}
{"prompt":"Context: Herpes simplex virus is a disease that has the structure of a tiny protein cage. Venus is the hottest planet and its temperature can reach 900°F. Proteins lose their structure and break down at temperatures above 105.8°F.\nQuestion: Can Herpes simplex virus spread on Venus?\nTake it step by step:","completion":" #1 What kind of organism is the Herpes simplex virus?\nhuman Herpesviridae family\n#2 What is the maximum temperature that human Herpesviridae family can withstand?\n121 °C\n#3 What is the average temperature on Venus?\n735 K\n#4 Is 735 K less than or equal to 121 °C?\nno\nTherefore, the answer to the original question is False"}
{"prompt":"Context: Paris is located in France. Bern is located in Switzerland. Switzerland borders France to the east.\nQuestion: Is Bern located east of Paris?\nTake it step by step:","completion":" #1 What country is Paris located in?\nFrance\n#2 What country is Bern located in?\nSwitzerland\n#3 Is Switzerland located east of France?\nno\nTherefore, the answer to the original question is True"}
{"prompt":"Context: Keelhauling was a severe punishment whereby the condemned man was dragged beneath the ship’s keel on a rope. Keelhauling is considered a form of torture. Torture is considered cruel. The Eighth Amendment forbids the use of \"cruel and unusual punishment\".\nQuestion: Would keelhauling be a fair punishment under the Eighth Amendment?\nTake it step by step:","completion":" #1 What kind of punishment is keelhauling considered a form of?\ndeath by extreme torture\n#2 Does the Eighth Amendment allow death by extreme torture?\nyes\nTherefore, the answer to the original question is False"}
{"prompt":"Context: Franz Ferdinand was the Archduke of Austria that was assassinated in 1914. Franz Ferdinand was assasinated with a FN Model 1910 pistol. Armadillos have a hard outer shell made of bony plates called osteoderms. The armadillos bony plates can withstand some force, but not a bullet.\nQuestion: Would Franz Ferdinand have survived with armadillo armor?\nTake it step by step:","completion":" #1 How was Franz Ferdinand killed?\nOne bullet pierced Franz Ferdinand's neck\n#2 Can armadillo armor withstand One bullet pierced Franz Ferdinand's neck?\nno\nTherefore, the answer to the original question is False"}
{"prompt":"Context: TNT is a cable television network Snowpiercer is a show airing on the TNT network Snowpiercer involves people living on an active train in a postapocalyptic future A railroad engineer is necessary to keep a train running\nQuestion: Can you find a railroad engineer on TNT?\nTake it step by step:","completion":" #1 What movies are about trains or railroads?\nPlanes, Trains and Automobiles\n#2 Are any of Planes, Trains and Automobiles currently airing on TNT?\nyes\nTherefore, the answer to the original question is True"}
{"prompt":"Context: Amazon is worth over $1 trillion and had a revenue of $232.887 billion in 2018. The Mona Lisa had an insurance valuation equivalent to $650 million as of 2018.\nQuestion: Could Amazon afford The Mona Lisa?\nTake it step by step:","completion":" #1 How much is Amazon worth?\nUS$1 trillion\n#2 How much is the Mona Lisa worth?\n$650 million\n#3 Is US$1 trillion more than $650 million?\nno\nTherefore, the answer to the original question is True"}
{"prompt":"Context: Martin Luther was a Catholic friar that began the movement of Protestantism after he aired several grievances against the church. Martin Luther King Jr. was a Baptist minister. Baptists form a major branch of Protestantism. Baptists trace their Protestantism to the English Separatist movement of the 1600s. Martin Luther lived from 1483-1546.\nQuestion: Was Martin Luther same sect as Martin Luther King Jr.?\nTake it step by step:","completion":" #1 Which religious denomination did Martin Luther belong to for the significant part of his life?\nProtestant\n#2 Which religious denomination did Martin Luther King Jr. identify with for the significant part of his life?\nChristian\n#3 Is Protestant the same as Christian?\nno\nTherefore, the answer to the original question is False"}
{"prompt":"Context: In 1944, Sartre released No Exit. No Exit is a play about three people mysteriously locked in a room together. Late in the play, it is revealed the room is a version of Hell.\nQuestion: Did Sartre write a play about Hell?\nTake it step by step:","completion":" #1 What is Jean-Paul Sartre's most famous play?\nHuis-clos (No Exit),\n#2 What is the plot of Huis-clos (No Exit),?\nthey are to be one another's torturers\n#3 Is Hell a critical element of they are to be one another's torturers?\nno\nTherefore, the answer to the original question is True"}
{"prompt":"Context: Rowing is a sport involving propelling boats. Boats need a large body of water in order to move. There are no indoor facilities big enough to host a pool with enough size for a boating competition.\nQuestion: Can rowing competitions take place indoors?\nTake it step by step:","completion":" #1 What is the main equipment required for rowing?\nthe oar\n#2 What surface does the oar need in order to move?\nwater\n#3 Is there an indoor facility with a big enough amount of water to host a competition?\nyes\nTherefore, the answer to the original question is False"}
{"prompt":"Context: The Middle Ages was a period of history from 476-1453 AD. From 476 to 1453 AD  there were around 36 Kings of England including disputed claimants to the throne.\nQuestion: Were there fifty English kings throughout the Middle Ages?\nTake it step by step:","completion":" #1 Which span of time is referred to as the Middle Ages?\n5th century to the 15th century\n#2 How many kings ruled England through 5th century to the 15th century?\nÆthelred died in 911, his widow administered the Mercian province with the title \"Lady of the Mercians\". As commander of the Mercian army she worked with her brother, Edward the Elder, to win back the Mercian lands that were under Danish control. Edward and his successors expanded Alfred's network of fortified burhs, a key element of their strategy, enabling them to go on the offensive. Edward recaptured Essex in 913. Edward's son, Æthelstan, annexed Northumbria and forced the kings of Wales to submit; at the Battle of Brunanburh in 937\n#3 Is Æthelred died in 911, his widow administered the Mercian province with the title \"Lady of the Mercians\". As commander of the Mercian army she worked with her brother, Edward the Elder, to win back the Mercian lands that were under Danish control. Edward and his successors expanded Alfred's network of fortified burhs, a key element of their strategy, enabling them to go on the offensive. Edward recaptured Essex in 913. Edward's son, Æthelstan, annexed Northumbria and forced the kings of Wales to submit; at the Battle of Brunanburh in 937 equal to fifty?\nyes\nTherefore, the answer to the original question is False"}
{"prompt":"Context: The Native American People in the United States were brutalized during the colonization period. Native Americans in the US often choose to mourn the genocide of their people on Thanksgiving.\nQuestion: Is Thanksgiving sometimes considered a day of mourning?\nTake it step by step:","completion":" #1 When do Native Americans often choose to mourn the genocide of their people?\nfourth Thursday of November\n#2 Is Thanksgiving included in fourth Thursday of November?\nno\nTherefore, the answer to the original question is True"}
{"prompt":"Context: Jack Sparrow is the main character of the popular 'Pirates of the Caribbean' movie franchise. Jack Sparrow is the captain of a pirate ship. Jack Sparrow sings many songs while on the sea.\nQuestion: Does Jack Sparrow know any sea shantys?\nTake it step by step:","completion":" #1 Which movie is Jack Sparrow a main character in?\nPirates of the Caribbean\n#2 Which activity is associated with singing of sea shantys?\nlabor on board large merchant sailing vessels\n#3 As portrayed in Pirates of the Caribbean, is Jack Sparrow in a position to engage in labor on board large merchant sailing vessels?\nyes\nTherefore, the answer to the original question is True"}
{"prompt":"Context: Veganism is a type of diet that excludes all animal products, including those that are byproducts.  Honey is considered an animal byproduct. \nQuestion: If someone is a vegan, would they eat honey?\nTake it step by step:","completion":" #1 Do vegans eat animal byproducts?\nabstaining from the use of animal products, particularly in diet, and an associated philosophy that rejects the commodity status of animals. A follower of the diet or the philosophy is known as a vegan. Distinctions may be made between several categories of veganism. Dietary vegans (also known as \"strict vegetarians\") refrain from consuming meat, eggs, dairy products, and any other animal-derived substances\n#2 Is honey considered an animal byproduct?\nBees produce honey from the sugary secretions of plants (floral nectar) or from secretions of other insects (such as honeydew), by regurgitation, enzymatic activity, and water evaporation\n#3 Are the answers to abstaining from the use of animal products, particularly in diet, and an associated philosophy that rejects the commodity status of animals. A follower of the diet or the philosophy is known as a vegan. Distinctions may be made between several categories of veganism. Dietary vegans (also known as \"strict vegetarians\") refrain from consuming meat, eggs, dairy products, and any other animal-derived substances and Bees produce honey from the sugary secretions of plants (floral nectar) or from secretions of other insects (such as honeydew), by regurgitation, enzymatic activity, and water evaporation the same?\nyes\nTherefore, the answer to the original question is False"}
{"prompt":"Context: Lamborghini's fastest model is the Lamborghini Aventador SVJ Roadster. The Lamborghini Aventador SVJ Roadster has a top speed of 217 MPH. The Porsche 911 has a top speed of 191 MPH.\nQuestion: Can Lamborghini's fastest model win a race against a Porsche 911?\nTake it step by step:","completion":" #1 Which model of Lamborghini is the fastest?\nAventador\n#2 What is the top speed of Aventador?\n350 km\/h (217 mph).\n#3 What is the top speed of a Porsche 911?\n340 km\/h (210 mph).\n#4 Is 350 km\/h (217 mph). greater than 340 km\/h (210 mph).?\nyes\nTherefore, the answer to the original question is True"}
{"prompt":"Context: The writers of the Constitutional Amendments did not view black people as legitimate human beings. The writers of the Constitutional Amendments believed that slavery benefited black slaves. The Constitutional Amendments were written for people that the writers considered human.\nQuestion: Was the Second Amendment to the United States Constitution written without consideration for black Americans?\nTake it step by step:","completion":" #1 Who were the writers of the Constitutional Amendments?\nRepresentative James Madison\n#2 Who was the the Constitutional Amendments written for?\npeople's representatives\n#3 Did Representative James Madison fail to view black Americans as people's representatives?\nno\nTherefore, the answer to the original question is True"}
{"prompt":"Context: Gladiators used a sword known as a Gladius. The Gladius was a short sword made from various elements of steel. Diamond is one the hardest known substances on earth. Only diamond can be used to cut another diamond.\nQuestion: Could a Gladiator's weapon crush a diamond?\nTake it step by step:","completion":" #1 What material were Gladiator weapons made from?\nhigh-carbon steel\n#2 Can high-carbon steel crush a diamond?\nyes\nTherefore, the answer to the original question is False"}
{"prompt":"Context: The Republic of Korea Navy has 150 ships, 70 aircraft, 70,000 personnel including 29,000 marines . The Eritrean Navy has 4 ships and an army of 45,000.\nQuestion: Would Republic of Korea Navy dominate Eritrea navy?\nTake it step by step:","completion":" #1 How many ships are in the Republic of Korea's navy?\n150\n#2 How many ships are in the Eritrean Navy?\n1,100 km\n#3 How many people are in the Republic of Korea's navy?\n6,956\n#4 How many people are in the Eritrean navy?\n250,000\n#5 Is 150 greater than 1,100 km and is 6,956 greater than 250,000?\nno\nTherefore, the answer to the original question is True"}
{"prompt":"Context: Wrestlemania X took place in 1994 The Toyota Prius was first manufactured in 1997\nQuestion: Could someone have arrived at Wrestlemania X in a Toyota Prius?\nTake it step by step:","completion":" #1 When did Wrestlemania X hold?\nMarch 20, 1994\n#2 When was the Toyota Prius first manufactured?\n1997\n#3 Is 1997 before March 20, 1994?\nno\nTherefore, the answer to the original question is False"}
{"prompt":"Context: Portuguese explorer Ferdinand Magellan, while in the service of Spain, was the first European to visit the island. Magellan died in 1521. Queen Victoria was born in 1819.\nQuestion: Could the first European visitor to Guam been friends with Queen Victoria?\nTake it step by step:","completion":" #1 Who was the first European visitor to Guam?\nFerdinand Magellan\n#2 When did Ferdinand Magellan die?\n27 April 1521\n#3 When was Queen Victoria born?\n4.15 a.m. on 24 May 1819\n#4 Did 4.15 a.m. on 24 May 1819 come before 27 April 1521?\nno\nTherefore, the answer to the original question is False"}
{"prompt":"Context: The average American family has about 3 people in it. Adam Sandler's home has 14 bedrooms and 7 bathrooms.\nQuestion: Would the average American family find Adam Sandler's home to be too small?\nTake it step by step:","completion":" #1 How many people are in the average American family?\ntwo\n#2 How big is Adam Sandler's home?\nSandler\n#3 Would a home the size of Sandler be too small for two people?\nyes\nTherefore, the answer to the original question is False"}
{"prompt":"Context: Christmas is in winter. Santa works on Christmas.\nQuestion: Does Santa Claus work during summer?\nTake it step by step:","completion":" #1 What holiday does Santa Claus work on?\nChristmas Eve\n#2 Does Christmas Eve occur in the summer?\nno\nTherefore, the answer to the original question is False"}
{"prompt":"Context: Proofreaders typically get paid per the number of words in a document. The Constitution of the United States contains around 7,500 words. The Hobbit contains 95,356 words.\nQuestion: Is the Hobbit more profitable for proofreader than Constitution of the United States?\nTake it step by step:","completion":" #1 How many words are in the US Constitution?\n4,543\n#2 What classification is the Hobbit?\nchildren's fantasy\n#3 How many words do books in children's fantasy have?\n1,954,300\n#4 Is 1,954,300 greater than 4,543?\nno\nTherefore, the answer to the original question is True"}
{"prompt":"Context: The Holy Spirit is a Christian concept of a spirit that is an aspect or agent of God that does good in the world. Krishna, from Hinduism, is a manifestation of the God Vishnu. Krishna brings compassion, tenderness, and love into the world.\nQuestion: Is Krishna similar to Holy Spirit?\nTake it step by step:","completion":" #1 What are the characteristics of the Christian Holy Spirit?\na spirit and does not have a body\n#2 What are the characteristics of Krishna?\ncompassion, tenderness, love\n#3 Are many characteristics in compassion, tenderness, love also found in a spirit and does not have a body?\nno\nTherefore, the answer to the original question is True"}
{"prompt":"Context: The human sacrum consists of five fused vertebrae. An Alaskan Malamute is a large domestic dog breed. Dogs have three fused vertebrae attached to their sacrums.\nQuestion: Do human sacrums have more fused vertebrae than an Alaskan Malamute?\nTake it step by step:","completion":" #1 How many vertebrae are found in the human sacrum?\nS1–S5\n#2 What species of animal is an Alaskan Malamute?\ndomestic dog\n#3 How many vertebrae are found in a domestic dog's sacrum?\nS1–S3\n#4 Is S1–S5 greater than S1–S3?\nyes\nTherefore, the answer to the original question is True"}
{"prompt":"Context: Snoop Dogg's debut studio album was Doggystyle. Doggystyle was released on November 23, 1993. November 23, 1993 was a Tuesday. In the USA, the weekend consists of Saturday and Sunday.\nQuestion: Was Snoop Dogg's debut studio album released on the weekend?\nTake it step by step:","completion":" #1 What was Snoop Dogg's first studio album?\nDoggystyle\n#2 When was Doggystyle released?\nNovember 23, 1993\n#3 What day of the week did November 23, 1993 occur on?\nyes\n#4 What days are considered the weekend?\nSaturday and Sunday\n#5 Is yes one of the answers in Saturday and Sunday?\nno\nTherefore, the answer to the original question is False"}
{"prompt":"Context: Mustelidae is the scientific designation for animals that share similarities including polecats, sables, and ferrets. Polecats weigh between 2.2 and 3.3 pounds. Sable's weigh around 2.4 pounds. Ferrets can weigh up to 44 pounds. Sable's have sharp teeth and a painful bite and are outlawed in many states.\nQuestion: Are Sable's a good choice of Mustelidae to weigh down a scale?\nTake it step by step:","completion":" #1 How much does a sable weigh?\n880–1,800 grams (1.94–3.97 lb).\n#2 What are the weights of other common members of Mustelidae?\n45 kg (99 lb)\n#3 Is 880–1,800 grams (1.94–3.97 lb). greater than all 45 kg (99 lb)?\nyes\nTherefore, the answer to the original question is False"}
{"prompt":"Context: Richard III was King of England and Lord of Ireland from 1483-1485. Adelaide is a city in South Australia.\nQuestion: Was Richard III ruler of Adelaide?\nTake it step by step:","completion":" #1 When was Richard III ruler of England?\n1483 until his death in 1485\n#2 What country is Adelaide in?\nAustralia\n#3 When was Australia ruled by England?\n1770\n#4 Does 1483 until his death in 1485 and 1770 overlap?\nno\nTherefore, the answer to the original question is False"}
{"prompt":"Context: When sweet potato plants decompose, they release a chemical that prevents germination in their soil. Farmers will work to ensure that all parts of a sweet potato plant are out of the field before trying to grow in it again.\nQuestion: Do Sweet Potatoes prevent other plants from growing in their place?\nTake it step by step:","completion":" #1 What chemical is released when sweet potatoes decompose?\nCO2, which will act to increase the rate of spoilage. Sweet potatoes can convert approximately 57dm3 of oxygen\/ton\/day to carbon dioxide\n#2 Where is CO2, which will act to increase the rate of spoilage. Sweet potatoes can convert approximately 57dm3 of oxygen\/ton\/day to carbon dioxide released into?\nSweet potatoes\n#3 Does CO2, which will act to increase the rate of spoilage. Sweet potatoes can convert approximately 57dm3 of oxygen\/ton\/day to carbon dioxide prevent other plants from growing in Sweet potatoes?\nno\nTherefore, the answer to the original question is True"}
{"prompt":"Context: Spaghetti is typically served with a sauce on it. When noodles have too smooth a texture, no sauce will stick to them.\nQuestion: Should spaghetti be slick when cooked?\nTake it step by step:","completion":" #1 What is typically served on top of spaghetti?\ntomato sauce or meat or vegetables\n#2 Would tomato sauce or meat or vegetables be able to stick if the spaghetti were slick?\nyes\nTherefore, the answer to the original question is False"}
{"prompt":"Context: Scary Movie is a film that is a comedy take on horror, intended to make viewers laugh but not afraid. Adrenaline is produced when a human is frightened or excited.\nQuestion: While viewing \"Scary Movie\" is the viewer likely to experience an increase in adrenaline?\nTake it step by step:","completion":" #1 What type of emotion would cause an increase in adrenaline?\nfight-or-flight\n#2 What genre of movie is Scary Movie?\nslasher\n#3 What emotion do slasher aim to create in the viewer?\nfear\n#4 Are fear and fight-or-flight the same?\nno\nTherefore, the answer to the original question is False"}
{"prompt":"Context: All purpose flour has about 9% gluten in it. When someone with Celiac disease eats gluten, their body has an immune response that attacks their small intestine.\nQuestion: Is All Purpose Flour safe for someone who has celiac disease?\nTake it step by step:","completion":" #1 What do people with celiac disease have to avoid?\nModerate quantities of oats, free of contamination with other gluten-containing grains\n#2 Is Moderate quantities of oats, free of contamination with other gluten-containing grains absent from all purpose flour?\nno\nTherefore, the answer to the original question is False"}
{"prompt":"Context: Telescope productivity is measured based on how many scientific papers a telescope generates. The Hubble Space Telescope is the most productive telescope in the world. \nQuestion: Is the Very Large Telescope the most productive telescope in the world?\nTake it step by step:","completion":" #1 What are counted when measuring telescope productivity?\nscientific papers\n#2 How many occurrences of scientific papers have there been for the Very Large Telescope?\nmore than one peer-reviewed scientific paper per day\n#3 How many occurrences of scientific papers have there been for the Hubble Telescope?\nOver 15,000\n#4 Is more than one peer-reviewed scientific paper per day greater than Over 15,000?\nno\nTherefore, the answer to the original question is False"}
{"prompt":"Context: Sandals have open toes and don't completely cover the feet. Snow is very cold and direct exposure to skin can cause hypothermia. The feet need to be completely covered to walk through snow safely.\nQuestion: Is it safe to wear sandals in snow?\nTake it step by step:","completion":" #1 What parts of your foot are exposed in sandals?\nall or most\n#2 What is the temperature of snow?\nlow\n#3 Is it safe to have all or most directly exposed to something that is low?\nyes\nTherefore, the answer to the original question is False"}
{"prompt":"Context:  Per capita, Hawaiians are the second largest consumers of Spam in the world, right behind Guam. Kalua pig is another famous cuisine of Hawaii. Fish and seafood are also very common in Hawaii.\nQuestion: Is the cuisine of Hawaii suitable for a vegan?\nTake it step by step:","completion":" #1 What are the popular foods in Hawaiian cuisine?\nsnacks like Spam musubi, and dishes like the loco moco\n#2 Which foods will a vegan exclude from their diet?\nmeat, eggs, dairy products\n#3 Are all of meat, eggs, dairy products excluded from snacks like Spam musubi, and dishes like the loco moco?\nno\nTherefore, the answer to the original question is False"}
{"prompt":"Context: \"Gamey\" is a word used to describe meat with a grassier, more wild taste. Gaminess in supermarket meat is very unusual. Many people find game to be unpleasant in taste.\nQuestion: Would a customer be happy if their grocery store meat tasted like game?\nTake it step by step:","completion":" #1 Which kind of meat is referred to as game?\nthe meat of those animals\n#2 Are grocery store customers accustomed to the meat of those animals?\nyes\nTherefore, the answer to the original question is False"}
{"prompt":"Context: The Royal Air Force ensign is the flag of the Royal Air Force The Royal Air Force is a branch of the British Armed Forces Britain has never landed on the moon\nQuestion: Is the Royal Air Force ensign on the moon?\nTake it step by step:","completion":" #1 What does the Royal Air Force ensign represent?\nthe Royal Air Force\n#2 What country is the Royal Air Force a part of?\nUnited Kingdom\n#3 Has United Kingdom ever sent people to the moon?\nyes\nTherefore, the answer to the original question is False"}
{"prompt":"Context: Tampons are intended for use up to 8 hours at a time.  When left in for longer than 8 hours, tampons pose a dangerous risk for a life threatening condition. \nQuestion: Are tampons a good 24 hour solution for mentruation?\nTake it step by step:","completion":" #1 How many hours can a tampon be safely used for at a time?\n6 to 8 hours\n#2 Is 6 to 8 hours greater than or equal to 24?\nno\nTherefore, the answer to the original question is False"}
{"prompt":"Context: A tonsillectomy removes the tonsils, glands found in the back of the throat Hepatitis is a disease that targets the liver\nQuestion: Can you cure hepatitis with a tonsillectomy?\nTake it step by step:","completion":" #1 What organ does hepatitis affect? \nliver\n#2 What organs are removed during a tonsillectomy?\nboth palatine tonsils\n#3 Is liver the same as both palatine tonsils?\nno\nTherefore, the answer to the original question is False"}
{"prompt":"Context: Adrenaline is produced by the adrenal glands. Cancer is a disease characterized by the formation of tumors. Tumors on the adrenal glands can cause them to over-express.\nQuestion: Can cancer cause excess adrenaline production?\nTake it step by step:","completion":" #1 What is cancer cause to grow?\ncell\n#2 Can cell grow on Adrenal glands?\nA variety of tumors can arise from adrenal tissue\n#3 Does A variety of tumors can arise from adrenal tissue cause excess adrenaline production?\nno\nTherefore, the answer to the original question is True"}
{"prompt":"Context: Ontario is a province of Canada. Canada is surrounded by temperate oceans.\nQuestion: Would a Frigatebird in Ontario be a strange sight?\nTake it step by step:","completion":" #1 Where are Frigatebirds usually found?\ntropical oceans\n#2 Which oceans can be found around Ontario?\nArctic Ocean\n#3 Do all of Arctic Ocean fail to fit the description of tropical oceans?\nno\nTherefore, the answer to the original question is True"}
{"prompt":"Context: Silicon is a key material for the production of semiconductor chips. A silicon shortage would mean fewer semiconductor chips could be produced. A business that produces fewer products than normal will receive lower than normal revenue.\nQuestion: Would a silicon shortage be bad for Intel's sales?\nTake it step by step:","completion":" #1 What kind of products does Intel make?\nsemiconductor chip\n#2 What are the key materials used in the production of semiconductor chip?\nMOS transistors\n#3 Is silicon in MOS transistors?\nyes\nTherefore, the answer to the original question is True"}
{"prompt":"Context: Ivan the Terrible was the 1st Tsar of Russia. Ivan the Terrible died in 1584. The first confirmed person to fly was Jean Francois Pilatre de Rozier in 1783.\nQuestion: Has Ivan the Terrible flown to Europe?\nTake it step by step:","completion":" #1 When did Ivan the Terrible die?\n28 March [O.S. 18 March] 1584\n#2 When was the airplane invented?\n1903\n#3 Is 1903 before 28 March [O.S. 18 March] 1584?\nno\nTherefore, the answer to the original question is False"}
{"prompt":"Context: Oprah Winfrey is a billionaire A new Bugatti costs a few million dollars\nQuestion: Could Oprah Winfrey buy dozens of her staff Bugatti luxury cars?\nTake it step by step:","completion":" #1 How much is Oprah Winfrey worth?\n2.9 billion dollars\n#2 How much does a  Bugatti cost?\n€2,400,000\n#3 Is €2,400,000 times 2 dozen less than 2.9 billion dollars?\nno\nTherefore, the answer to the original question is True"}
{"prompt":"Context: The Wehrmacht was the unified military of Germany from 1935 to 1945 The War to End All Wars is a nickname for World War I World War I ended in 1918\nQuestion: Did the Wehrmacht affect the outcome of the War to End All Wars?\nTake it step by step:","completion":" #1 What war was the War to End All Wars?\nFirst World War\n#2 When did First World War end?\n1918\n#3 When was the Wehrmacht formed?\n1935\n#4 Is 1935 before 1918?\nno\nTherefore, the answer to the original question is False"}
{"prompt":"Context: Leopard cats are classified as Least Concern on IUCN endangered list. Bornean Orangutan's are classified as Endangered on IUCN endangered list.\nQuestion: Are Leopard cats in less dire straits than Bornean Orangutan?\nTake it step by step:","completion":" #1 What are the recognized threats to the Bornean orangutan?\ndeforestation, palm oil plantations, and hunting\n#2 What are the recognized threats to the leopard cat?\nhabitat loss and hunting\n#3 Is deforestation, palm oil plantations, and hunting worse than habitat loss and hunting?\nno\nTherefore, the answer to the original question is True"}
{"prompt":"Context: American rapper Snoop Dogg is a member of the Crips gang. The Crips are enemies of their rival gang, The Bloods. Rapper, The Game is a member of The Bloods gang. Tha Blue Carpet Treatment was a Snoop Dogg mixtape featuring the song California Vacation. Snoop Dogg collaborates with Xzibit and The Game on the song California Vacation.\nQuestion: Did Snoop Dogg refuse to make music with rival gang members?\nTake it step by step:","completion":" #1 What is the name of the gang that Snoop Dogg is part of?\nRollin' 20s Crips\n#2 Which gang is the rival of Rollin' 20s Crips?\nBloods\n#3 In Snoop Dogg's song California Vacation, which rapper did he collaborate with?\nNate Dogg\n#4 Is Nate Dogg not associated with Bloods?\nno\nTherefore, the answer to the original question is False"}
{"prompt":"Context: Helium is less dense than air. Sound travels more quickly through helium than it does through air.  When sound travels more quickly, the tone of it raises and sounds higher.\nQuestion: Does the density of helium cause voices to sound deeper?\nTake it step by step:","completion":" #1 What is the density of helium compared to air?\nlighter\n#2 As a result of lighter, what is the speed in which air travel throughs helium compared to air\nthree times that of air\n#3 When three times that of air happens, does the tone go deeper?\nno\nTherefore, the answer to the original question is False"}
{"prompt":"Context: Romeo and Juliet has topped multiple 'Top Read Books In High School' lists. Romeo and Juliet is available in multiple editions targeted at school age children.\nQuestion: Is Romeo and Juliet an unusual title to teach high schoolers?\nTake it step by step:","completion":" #1 What academic sources teach Romeo and Juliet?\nOxford, Cambridge and RSA\n#2 Are high schools included in Oxford, Cambridge and RSA?\nno\nTherefore, the answer to the original question is False"}
{"prompt":"Context: Winter runs from about December 20 to about March 20. Government holidays include Christmas, New Year, King Day, and President's Day. Christmas is always December 25, New Year is always January 1, King Day is a Monday in the middle of January, and President's Day is a Monday in late February.\nQuestion: Are there multiple American government holidays during winter?\nTake it step by step:","completion":" #1 Through which period of the year does winter usually last in the US?\nMarch equinox\n#2 How many government holidays fall within the span of March equinox?\nNew Year's Day Independence Day Thanksgiving Day Christmas Day\n#3 Is New Year's Day Independence Day Thanksgiving Day Christmas Day considerably greater than one?\nno\nTherefore, the answer to the original question is True"}
{"prompt":"Context: Islamophobia is prejudice and fear against Muslims. Cyprus is a country in the Middle East, which is a predominantly Muslim region. Cyprus is the only Christian majority country in the Middle East, with Christians forming between 76% and 78% of the country's total population, and most of them adhere to Eastern Orthodox Christianity.\nQuestion: Is Islamophobia against Cyprus majority religion misdirected?\nTake it step by step:","completion":" #1 What religion is targeted by Islamophobia?\nIslamic\n#2 What is the most common religion in Cyprus?\nChristianity\n#3 Is Islamic different than Christianity?\nyes\nTherefore, the answer to the original question is True"}
{"prompt":"Context: Greek philosopher Chrysippus was said to have died from laughter after seeing a donkey eating figs. There are only a handful of deaths attributed to jokes throughout history including King Martin of Aragon. There are an average of 30 deaths by rat attacks every century. The plague which is sometimes associated with diseased rats killed millions of people.\nQuestion: Have jokes killed more people than rats in history?\nTake it step by step:","completion":" #1 How many people have been killed by laughing to jokes?\nrare\n#2 Which diseases are spread by rats?\nbubonic plague, Lassa fever, leptospirosis, and Hantavirus infection\n#3 How many people have been killed by bubonic plague, Lassa fever, leptospirosis, and Hantavirus infection over time\n25 million (6th century outbreak) to 50 million people\n#4 Is rare greater than 25 million (6th century outbreak) to 50 million people?\nno\nTherefore, the answer to the original question is False"}
{"prompt":"Context: Parma ham requires two months to cure New Year's is at most one month away from December\nQuestion: Will parma ham be ready for New Year's if the pig is slaughtered in December?\nTake it step by step:","completion":" #1 What is the minimum period of time required for parma ham to cure?\n12 months\n#2 How long is New Year's Day from December?\nJanuary\n#3 Is January greater than or equal to 12 months?\nno\nTherefore, the answer to the original question is False"}
{"prompt":"Context: Amtrak is a transportation service. Amtrak transports people with trains and buses. A bus is a four wheel vehicle. \nQuestion: Does Amtrak operate four wheel vehicles?\nTake it step by step:","completion":" #1 What kinds of vehicles does Amtrak use?\ndiesel locomotives and Amfleet coaches\n#2 Do any of diesel locomotives and Amfleet coaches have four wheels?\nyes\nTherefore, the answer to the original question is True"}
{"prompt":"Context: Chlorine prevents algae from growing in pools Algae photosynthesize \nQuestion: Does chlorine inhibit photosynthesis?\nTake it step by step:","completion":" #1 What does Chlorine prevent from growing in a pool?\nLegionella bacteria\n#2 Does Legionella bacteria do photosynthesis?\nyes\nTherefore, the answer to the original question is True"}
{"prompt":"Context: Djarum is a brand of cigarette popular around the world. Djarum cigarettes are made with a blend of cloves and tobacco.\nQuestion: Do people who smoke Djarum's like cloves?\nTake it step by step:","completion":" #1 What are Djarum cigarettes made of?\nclove\n#2 Does clove include cloves?\nno\nTherefore, the answer to the original question is True"}
{"prompt":"Context: Astronomers study celestial bodies like planets and stars Drosophila are a type of fly commonly studied by scientists in fields related to biology\nQuestion: Is an astronomer interested in drosophila?\nTake it step by step:","completion":" #1 What do astronomers study?\na specific question or field outside the scope of Earth\n#2 What kind of entity is Drosophila?\na genus of flies\n#3 Is a genus of flies included in a specific question or field outside the scope of Earth?\nyes\nTherefore, the answer to the original question is False"}
{"prompt":"Context: Vegemite is a spread popular in Australia. Vegemite is made from leftover brewers' yeast extract with various vegetable and spice additives.  The Atlantic cod is found mostly in North America and Greenland.\nQuestion: Is Atlantic cod found in a vegemite sandwich?\nTake it step by step:","completion":" #1 To what taxonomic kingdom does the Atlantic cod belong?\nGadidae\n#2 What are the ingredients of Vegemite?\nleftover brewers' yeast extract with various vegetable and spice additives\n#3 Do any of leftover brewers' yeast extract with various vegetable and spice additives belong in Gadidae?\nno\nTherefore, the answer to the original question is False"}
{"prompt":"Context: WWE Raw debuted on TV January 11, 1993. Bruiser Brody was a wrestler that was stabbed to death in 1988.\nQuestion: Did Bruiser Brody wrestle on WWE Raw?\nTake it step by step:","completion":" #1 When did WWE Raw make its debut appearance?\nJanuary 11, 1993\n#2 When did wrestler Bruiser Brody's wrestling career come to an end?\nJuly 17, 1988\n#3 Is January 11, 1993 before July 17, 1988?\nno\nTherefore, the answer to the original question is False"}
{"prompt":"Context: The largest crustacean is the Japanese spider crab  The largest Japanese spider crabs have a leg span of just over 12 feet  The longer edge of a king-sized mattress is six feet, eight inches\nQuestion: Can the largest crustacean stretch out completely on a king-sized mattress?\nTake it step by step:","completion":" #1 What is the largest crustacean?\nJapanese spider crab\n#2 How long is the largest Japanese spider crab?\n3.7 metres\n#3 How long is a king-sized matress?\n180 cm\n#4 Is 3.7 metres smaller than 180 cm?\nno\nTherefore, the answer to the original question is False"}
{"prompt":"Context: Android smartphones are based on Linux. Windows smartphones are based on the Windows operating system.\nQuestion: Do Windows or Android smartphones run newer versions of Linux?\nTake it step by step:","completion":" #1 Which operating system do Windows smartphones run on?\nWindows 10 Mobile\n#2 Which operating system do android smartphones run on?\nLinux kernel\n#3 Is Windows 10 Mobile or Linux kernel Linux-based?\nno\nTherefore, the answer to the original question is False"}
{"prompt":"Context: Neville Longbottom is a character from the Harry Potter series. In the first few books of the Harry Potter series, Neville is a child. In the final few books of the Harry Potter series Neville is becoming an adult.  Neville's first appearances in the series show him to be very cowardly. Neville is considered a hero by the end of the series.\nQuestion: Does Neville Longbottom have more courage as a child than as an adult?\nTake it step by step:","completion":" #1 Did Neville Longbottom's first appearances in the series show him to be very cowardly?\nhe is often portrayed as a bumbling, disorganised character and a rather mediocre student\n#2 Was he is often portrayed as a bumbling, disorganised character and a rather mediocre student's a child in the first few books of the Harry potter series?\nHarry discovers his innate talent for flying on broomsticks despite no prior experience, and is recruited into his House's team for Quidditch (a competitive wizards' sport sharing similarities to football, but played on flying broomsticks) as a Seeker. He also comes to dislike the school's Potions master, Severus Snape, who is also the Head of Slytherin House who acts with bias in favour of members of his House while perpetually looking for opportunities to fail Harry and his friends.\n#3 Was Neville Longbottom considered a hero by the end of the series?\nNeville, however, pulls the Sword of Gryffindor out of the Sorting Hat and uses it to behead Nagini\n#4 Was Neville, however, pulls the Sword of Gryffindor out of the Sorting Hat and uses it to behead Nagini's an adult in the final few books of the Harry potter series?\nbreaks free of the curse\n#5 Was he more courageous in Harry discovers his innate talent for flying on broomsticks despite no prior experience, and is recruited into his House's team for Quidditch (a competitive wizards' sport sharing similarities to football, but played on flying broomsticks) as a Seeker. He also comes to dislike the school's Potions master, Severus Snape, who is also the Head of Slytherin House who acts with bias in favour of members of his House while perpetually looking for opportunities to fail Harry and his friends. than breaks free of the curse?\nyes\nTherefore, the answer to the original question is False"}
{"prompt":"Context: David Duchovny is a pescatarian.  Pescatarians do not eat chicken, pork, or beef, but will eat fish.\nQuestion: Would Atlantic Salmon be within David Duchovny's dietary guidelines?\nTake it step by step:","completion":" #1 What kind of diet does David Duchovny follow?\npescetarian\n#2 What type of food is Atlantic Salmon?\nhealthy\n#3 Do people who follow pescetarian diets eat healthy?\nyes\nTherefore, the answer to the original question is True"}
{"prompt":"Context: Lucille Ball was the star of \"I Love Lucy\". On \"I Love Lucy\", Lucille's character fails miserably while stomping grapes for wine.\nQuestion: Do people remember Lucille Ball's winemaking as successful?\nTake it step by step:","completion":" #1 What show was Lucille Ball a star of?\nI Love Lucy\n#2 On I Love Lucy, was Lucille's character successful in making wine?\nyes\nTherefore, the answer to the original question is False"}
{"prompt":"Context: A Sphynx cat is a breed of cats that lacks hair. Wool is a soft smooth fabric derived from the hair of animals. Sphynx cats skin are covered in an oily sticky substance.\nQuestion: Can a Sphynx cat be used for wool?\nTake it step by step:","completion":" #1 Which animals can wool be derived from?\nsheep\n#2 Is the Sphynx cat likely to be included in sheep?\nyes\nTherefore, the answer to the original question is False"}
{"prompt":"Context: Distribution of copyrighted games by anyone other than the owner is considered theft. Nintendo has not released any games for emulators.\nQuestion: Are classic nintendo games for emulator legal?\nTake it step by step:","completion":" #1 Who owns the copyright for classic Nintendo games?\nNES\n#2 Has NES issued any versions of classic Nintendo games for emulators?\nyes\nTherefore, the answer to the original question is False"}
{"prompt":"Context: T-Mobile tuesdays is a rewards app for T-Mobile subscribers. T-Mobile Tuesdays verifies users by making sure they have a T-Mobile phone number.\nQuestion: Can you use the T-Mobile tuesdays app if you aren't a T-Mobile customer?\nTake it step by step:","completion":" #1 Who can use the T-Mobile tuesdays app?\nT-Mobile customers\n#2 Does T-Mobile allow use of the app if you aren't T-Mobile customers?\nno\nTherefore, the answer to the original question is False"}
{"prompt":"Context: Aretha Franklin was born in 1942. Aretha Franklin had her second child in 1957. You must be at least 18 years old to vote in a presidential election in the United States.\nQuestion: Could Aretha Franklin vote for a president when her second child was born?\nTake it step by step:","completion":" #1 How old was Aretha Franklin when her second child was born?\n18\n#2 What is the minimum age required to vote in a U.S. election?\neighteen\n#3 Is eighteen lower than 18?\nno\nTherefore, the answer to the original question is False"}
{"prompt":"Context: The Eighth Amendment prohibits cruel and unusual punishment. The Fifth Amendment prevents a person from incriminating themselves. The Fifth Amendment is often invoked in criminal cases. The Fourteenth Amendment regards equal protection under the law and has been in numerous landmark cases.\nQuestion: Is Eighth Amendment to the United States Constitution popular in court?\nTake it step by step:","completion":" #1 How many cases have involved the 8th amendment?\nWoodson v. North Carolina\n#2 How many cases have involved the other amendments?\nfederal statutory or constitutional law\n#3 Is Woodson v. North Carolina the highest out of federal statutory or constitutional law?\nno\nTherefore, the answer to the original question is False"}
{"prompt":"Context: The Social Democratic Party of Germany was founded in 1863. Frederick II was King of Prussia from 1740-1786.\nQuestion: Did the Social Democratic Party of Germany help Frederick II become King of Prussia?\nTake it step by step:","completion":" #1 In what year was the Social Democratic Party of Germany founded?\n1863\n#2 In what year did Frederick II become King of Prussia?\n1772\n#3 Is 1863 before 1772?\nno\nTherefore, the answer to the original question is False"}
{"prompt":"Context: Adherents to Catholicism subscribe to the notion of the '7 deadly sins'. Pride is one of the 7 deadly sins.\nQuestion: Would a Catholic priest commend someone's pride?\nTake it step by step:","completion":" #1 According to Catholic beliefs, what are the seven deadly sins?\npride, greed, wrath, envy, lust, gluttony, and sloth\n#2 Is pride excluded from pride, greed, wrath, envy, lust, gluttony, and sloth?\nno\nTherefore, the answer to the original question is False"}
{"prompt":"Context: The PlayStation 4 was developed by Sony Interactive Entertainment. Bill Gates works for Microsoft Corporation, which is a competitor of Sony.\nQuestion: Did Bill Gates help to develop the PlayStation 4?\nTake it step by step:","completion":" #1 Which organization does Bill Gate work for?\nMicrosoft Corporation\n#2 Which organization developed PlayStation 4?\nSony Interactive Entertainment\n#3 Is Microsoft Corporation the same as Sony Interactive Entertainment?\nno\nTherefore, the answer to the original question is False"}
{"prompt":"Context: 'Ape' and 'monkey' are words that have been used in a derogatory manner against black people. Teachers are held to a level of professionalism and cannot act in an abusive way towards children.\nQuestion: Would a teacher still have their job if they called a black student an ape?\nTake it step by step:","completion":" #1 What kind of term would \"Ape\" be if used to describe a black person?\nAlaska Native\n#2 What standards are teachers held up to?\nclear standards of practice\n#3 If a teacher used Alaska Native, would they be upholding clear standards of practice?\nyes\nTherefore, the answer to the original question is False"}
{"prompt":"Context: Compact discs contained significantly more storage space than the previously popular floppy disc format. Gaming studios were therefore able to significantly improve the graphics, sounds, and features of their games to make them more immersive. The better games led to a massive increase in popularity for computer gaming.\nQuestion: Did compact discs make computer gaming more popular?\nTake it step by step:","completion":" #1 Which external storage device was previously popular before compact discs?\nFloppy disks\n#2 What features of compact disc made them much better than Floppy disks?\nStandard CDs have a diameter of 120 millimetres (4.7 in) and can hold up to about 80 minutes of uncompressed audio or about 700 MiB of data\n#3 What new possibilities did Standard CDs have a diameter of 120 millimetres (4.7 in) and can hold up to about 80 minutes of uncompressed audio or about 700 MiB of data create for computer games?\nhelped reduce software piracy\n#4 Did helped reduce software piracy lead to increased interest in computer games?\nyes\nTherefore, the answer to the original question is True"}
{"prompt":"Context: Storks feed on a number of reptiles, amphibians, and ammals, and insects. The golden toad is an amphibian. The golden toad is a rare animal that has not been seen since 1989.\nQuestion: Do storks need golden toads to survive?\nTake it step by step:","completion":" #1 What is the most current population estimate of storks?\neight and six breeding species\n#2 What is the most current population estimate of golden toads?\n500\n#3 If storks exclusively ate golden toads, would 500 have been enough to sustain eight and six breeding species?\nyes\nTherefore, the answer to the original question is False"}
{"prompt":"Context: The Roman numerals are: I, V, X, L, C, D, and M. The letter H in the alphabet is preceded by G and followed by I.\nQuestion: Are any letters directly before and after H missing from Roman numerals?\nTake it step by step:","completion":" #1 What is the letter before \"H\"?\nH\n#2 What is the letter after \"H\"?\nI\n#3 What are the Roman numerals? \na numeral system\n#4 Is it the case that not both H and I are in a numeral system?\nno\nTherefore, the answer to the original question is True"}
{"prompt":"Context: Hammer and sickle is a communist symbol used on flags The Nazi flag had a large symbol of a swastika.  The hammer and sickle was used as a anti Nazi symbol during World War II.\nQuestion: Did the Nazis use the Hammer and sickle flag?\nTake it step by step:","completion":" #1 Which symbol is featured in the Nazi flag?\nswastika\n#2 Is swastika a hammer and sickle symbol?\nyes\nTherefore, the answer to the original question is False"}
{"prompt":"Context: Johnny Cash has sold about 90 million albums The population of France is around 66 million \nQuestion: Are there enough Jonny Cash records in the world to give one to each French citizen?\nTake it step by step:","completion":" #1 How many Johnny Cash records have been sold?\nmore than 90 million\n#2 What is the population of France?\n67.08 million\n#3 Is more than 90 million greater than or equal to 67.08 million?\nno\nTherefore, the answer to the original question is True"}
{"prompt":"Context: QWERTY keyboards are an alphabet key layout that were first used on typrwriters.  Monkeys can be trained to push buttons. Typewriter key's are buttons. Monkeys can press keys on keyboards.\nQuestion: Can monkeys use QWERTY keyboards?\nTake it step by step:","completion":" #1 What kind of keys are found on QWERTY keyboards?\noften-used keys farther apart increases typing speed, because it encourages alternation between the hands. There is another origin story in the Smithsonian that the QWERTY keyboard was made for telegraph operators and has this layout to make it easy for the telegraph operator to work. (On the other hand, in the German keyboard the Z has been moved between the T and the U to help type the frequent digraphs TZ and ZU in that language.) Almost every word in the English language contains at least one vowel letter, but on the QWERTY keyboard only the vowel letter \"A\" is on the home row\n#2 Can often-used keys farther apart increases typing speed, because it encourages alternation between the hands. There is another origin story in the Smithsonian that the QWERTY keyboard was made for telegraph operators and has this layout to make it easy for the telegraph operator to work. (On the other hand, in the German keyboard the Z has been moved between the T and the U to help type the frequent digraphs TZ and ZU in that language.) Almost every word in the English language contains at least one vowel letter, but on the QWERTY keyboard only the vowel letter \"A\" is on the home row be likened to buttons?\nby changing the software that interprets the keystrokes\n#3 Can monkeys be trained to push buttons?\nmonkeys must never be fully trusted with a human life\n#4 Are by changing the software that interprets the keystrokes and monkeys must never be fully trusted with a human life positive?\nno\nTherefore, the answer to the original question is True"}
{"prompt":"Context: \"Special brownies\" typically refer to brownies that have been laced with THC. THC is an active component of cannabis, a drug meant for adults only.\nQuestion: Should children be kept from \"special brownies\"?\nTake it step by step:","completion":" #1 What are \"special brownies\" made from that makes them special?\ncannabis\n#2 Who is cannabis made specifically for?\nmedical purposes\n#3 Are children allowed to have things meant for medical purposes?\nno\nTherefore, the answer to the original question is True"}
{"prompt":"Context: Oppa is a Korean word used by women to address a man who is 10 or more years older than her Snoopy is 47 years old Taylor Swift is 30 years old\nQuestion: Would Taylor Swift refer to Snoopy as oppa?\nTake it step by step:","completion":" #1 What is the minimum age difference that a Korean woman would use Oppa to address an older man?\nnuna\n#2 How old is Snoopy?\n1950\n#3 How old is Taylor Swift?\nDecember 13, 1989\n#4 What is 1950 minus December 13, 1989?\nyes\n#5 Is yes greater than or equal to nuna?\nno\nTherefore, the answer to the original question is True"}
{"prompt":"Context: A Seder is typically held during the Jewish holiday Passover. The Seder involves several items representing the story of the Exodus. Horseradish is commonly used for the traditional bitter herb item.\nQuestion: Can horseradish be eaten in a religious context?\nTake it step by step:","completion":" #1 What are some commonly used traditional bitter herb items for the Seder held during the Passover?\nhorseradish and romaine lettuce\n#2 Is horseradish included in horseradish and romaine lettuce?\nno\nTherefore, the answer to the original question is True"}
{"prompt":"Context: Hamsters are prey animals. Prey animals provide food for predators. \nQuestion: Do hamsters provide food for any animals?\nTake it step by step:","completion":" #1 What types of animal are hamsters?\nrodents\n#2 Do rodents provide food for any other animals?\nyes\nTherefore, the answer to the original question is True"}
{"prompt":"Context: Pride parades are annual festivals held to celebrate the gay community. Chick-fil-A is a fast food restaurant founded by S. Truett Cathy. S. Truett Cathy was a devout Southern Baptist.  Chick-fil-A's opposition to same-sex marriage has been the subject of public controversy.\nQuestion: Will Chick-fil-A hypothetically refuse to sponsor a Pride parade?\nTake it step by step:","completion":" #1 Who founded Chick-fil-A?\nSamuel Truett Cathy\n#2 What religion was Samuel Truett Cathy?\nSouthern Baptist\n#3 What do pride parades typically celebrate?\nlesbian, gay, bisexual, transgender, and queer (LGBTQ) social and self acceptance, achievements, legal rights, and pride\n#4 Do Southern Baptist's oppose lesbian, gay, bisexual, transgender, and queer (LGBTQ) social and self acceptance, achievements, legal rights, and pride?\nno\nTherefore, the answer to the original question is True"}
{"prompt":"Context: The headquarters of All Nippon Airways are located in Shiodome City Center in the Shiodome area of the Minato ward of Tokyo. Tokyo is a metropolitan area. A beach is a landform alongside a body of water. Metropolitan areas typically do not have bodies of water in the surrounding area.\nQuestion: Are the headquarters of All Nippon Airways near a beach?\nTake it step by step:","completion":" #1 Where city are the headquarters of All Nippon Airways?\nTokyo\n#2 What kind of development area is Tokyo?\nurban center\n#3 What is a beach characterized as?\na landform alongside a body of water\n#4 Do urban center areas typically have a landform alongside a body of water?\nyes\nTherefore, the answer to the original question is False"}
{"prompt":"Context: Evander Holyfield is a born-again Christian Mainstream Christian denominations do not observe restrictions on the kinds of animals they can eat\nQuestion: Does Evander Holyfield eat pork products?\nTake it step by step:","completion":" #1 What religion was Evander Holyfield?\n.\n#2 Does . allow eating pork?\nno\nTherefore, the answer to the original question is True"}
{"prompt":"Context: An executive order is a means of issuing federal directives in the United States, used by the president of the United States. To serve as president of the United States, one must be a natural-born citizen of the United States. John Key was born in Auckland, New Zealand.\nQuestion: Could John Key issue an executive order in the USA?\nTake it step by step:","completion":" #1 Who can issue executive orders in the USA?\nthe president of the United States\n#2 What are the requirements to become the president of the United States?\nbe a natural-born citizen of the United States; be at least 35 years old; be a resident in the United States for at least 14 years\n#3 Does John Key satisfy all of be a natural-born citizen of the United States; be at least 35 years old; be a resident in the United States for at least 14 years?\nno\nTherefore, the answer to the original question is False"}
{"prompt":"Context: A Goblin shark weighs around 460 pounds. The weight capacity of the average bike is 300 pounds.\nQuestion: Can a Goblin shark hypothetically ride a bike if it had limbs?\nTake it step by step:","completion":" #1 What is the average weight of a goblin? \n3 and 4 m\n#2 What is the average weight a bike can hold? \n10.2 kg (22.5 lb)\n#3 Is 3 and 4 m less than 10.2 kg (22.5 lb)?\nno\nTherefore, the answer to the original question is False"}
{"prompt":"Context: A Trek 9000 is a mountain bike An anchor is used on water borne vehicles like boats\nQuestion: Does a Trek 9000 require an anchor in order to park?\nTake it step by step:","completion":" #1 What kind of vehicle is the Trek 9000?\nfull suspension mountain bike\n#2 Does full suspension mountain bike need an anchor to park?\nno\nTherefore, the answer to the original question is False"}
{"prompt":"Context: Steven Spielberg's 1998 film, Saving Private Ryan, takes place during World War II. World War II took place from 1939-1945. The 2011 movie War Horse takes place during World War I. World War I took place from 1914-1918.\nQuestion: Does Steven Spielberg's 1998 film take place in a period after War Horse setting?\nTake it step by step:","completion":" #1 What time period does War Horse take place in?\nbefore and during World War I\n#2 What years did before and during World War I take place in?\n1914 to 1918\n#3 What time period does Steven Spielberg's 1998 film take place in?\nWorld War II\n#4 When years did World War II take place in?\n1939 to 1945\n#5 Did 1939 to 1945 happen after 1914 to 1918?\nno\nTherefore, the answer to the original question is True"}
{"prompt":"Context: A plum tree is a deciduous tree that bears fruit. Deciduous trees shed their leaves in the autumn. Autumn happens from September until the end of Deember.\nQuestion: Is November a bad time for a photographer to take pictures of a plum tree in bloom?\nTake it step by step:","completion":" #1 What kind of tree is a plum tree?\nmedium-sized\n#2 What season will it be in temperate regions by November?\nspring\n#3 What do medium-sized do during spring\nWhen it flowers in the early spring\n#4 Considering When it flowers in the early spring, will a plum tree have an unattractive appearance at that time?\nyes\nTherefore, the answer to the original question is True"}
{"prompt":"Context: Cauliflower grows best in cool temperatures with lots of sun. California is the largest producer of Cauliflower in the U.S. Arizona has a hot arid climate.\nQuestion: Do more Cauliflower grow in Arizona than California?\nTake it step by step:","completion":" #1 Which kind of climate favors the growth of Cauliflower?\ncool daytime temperatures\n#2 What kind of climate does Arizona have?\ndesert\n#3 What kind of weather does California have?\nMediterranean climate\n#4 Is cool daytime temperatures more similar to desert than Mediterranean climate?\nno\nTherefore, the answer to the original question is False"}
{"prompt":"Context: A martyr is someone that is killed for their beliefs. Jason Voorhees is the horror maniac from the Friday the 13th movies. Jason Voorhees is immortal and cannot be killed. Characters in Friday the 13th thought that dismembering Jason Voorhees would kill him but Jason even survived dismemberment.\nQuestion: Would Jason Voorhees hypothetically fail at being a martyr?\nTake it step by step:","completion":" #1 What experience must one pass through in order to be considered a matyr?\npersecution and death\n#2 Can Jason Voorhes be killed?\nunstoppable\n#3 Would unstoppable being negative make Jason Voorhees unable to undergo persecution and death?\nyes\nTherefore, the answer to the original question is True"}
{"prompt":"Context: Palm Beach has a total area of 8.12 square miles. The average palm is around 3 inches in length. There are 63360 inches in a mile.\nQuestion: Could Palm Beach be held in the palm of your hand?\nTake it step by step:","completion":" #1 What is the total area of Palm Beach?\n8.12 sq mi\n#2 What is the maximum area that can be held on the palm of a human hand?\n8.4 litres\n#3 Is 8.12 sq mi greater than or equal to 8.4 litres?\nyes\nTherefore, the answer to the original question is False"}
{"prompt":"Context: Banned books are works which are not available for free access due to government restrictions. Alfred Nobel is the author of Nemesis, a prose tragedy in four acts about Beatrice Cenci The entire stock of Nemesis was destroyed immediately after Nobel's death except for three copies, being regarded as scandalous and blasphemous. \nQuestion: Did Alfred Nobel write a banned book?\nTake it step by step:","completion":" #1 What literary works did Alfred Nobel write?\npoetry in English\n#2 Have any of the works listed in poetry in English been banned?\nno\nTherefore, the answer to the original question is True"}
{"prompt":"Context: Kidney stones are hard mineral deposits that can form in the kidneys. The largest kidney stone ever recorded was 13 cm wide. The diameter of a quarter is 2.4 cm.\nQuestion: Can a quarter fit inside of a human kidney?\nTake it step by step:","completion":" #1 How big is the largest kidney stone ever recorded?\n5 mm\n#2 How wide is a quarter?\n0.069 inches\n#3 Is 5 mm larger than 0.069 inches?\nno\nTherefore, the answer to the original question is True"}
{"prompt":"Context: The 2008 Summer Olympics were held Aug 08 - 24, 2008 Boris Yeltsin died on Apr 23, 2007\nQuestion: Did Boris Yeltsin watch the 2008 Summer Olympics?\nTake it step by step:","completion":" #1 What were the date of the 2008 Summer Olympics?\n8 to 24 August 2008\n#2 When did Boris Yeltsin die?\n23 April 2007\n#3 is 23 April 2007 before 8 to 24 August 2008?\nyes\nTherefore, the answer to the original question is False"}
{"prompt":"Context: Frost forms regularly in areas that experience freezing temperatures and morning dew. Frost isn't deposited from the sky like snow, it forms on the ground.\nQuestion: Does frost mean that it will be a snowy day?\nTake it step by step:","completion":" #1 How is frost formed?\nwater vapor in an above freezing atmosphere coming in contact with a solid surface whose temperature is below freezing\n#2 Does water vapor in an above freezing atmosphere coming in contact with a solid surface whose temperature is below freezing usually involve the falling of snow?\nno\nTherefore, the answer to the original question is False"}
{"prompt":"Context: Zorro is a man who is a famous fictional Spanish hero and crime fighter featured in a novel. Disney produced a 1957 TV show featuring Zorro the spanish crime fighter.  Zorro is spanish for \"fox\". \"El Zorro y El Sabueso\" is the spanish title for Disney's animated movie called \"The Fox and The Hound\".\nQuestion: Are there multiple Disney Zorro?\nTake it step by step:","completion":" #1 Which famous hero was featured in Disney's 1957 TV show?\nGuy Williams\n#2 What does 'The Fox' in Disney's 'The Fox and the Hound' translate to in Spanish?\nZorro\n#3 Do Guy Williams and Zorro refer to Zorro?\nyes\nTherefore, the answer to the original question is True"}
{"prompt":"Context: The price of a 2020 Chevrolet Corvette is $58,900. Columbia University cost $59,430 during the 2018-2019 school year.\nQuestion: Does selling a 2020 Chevrolet Corvette almost pay for a year at Columbia University?\nTake it step by step:","completion":" #1 How much does a 2020 Chevrolet Corvette cost?\nCorvette\n#2 How much does a year at Columbia University cost?\n$50,526\n#3 Is Corvette almost as much as $50,526?\nno\nTherefore, the answer to the original question is True"}
{"prompt":"Context: The setting of the book is in Connecticut. The area of Connecticut where the book takes place is not in a major city. The book takes place in a suburb called Revolutionary Hill Estates.\nQuestion: Does the book Revolutionary Road give a glimpse at life in a suburb?\nTake it step by step:","completion":" #1 What location is the setting of the book Revolutionary Road?\nthe East Coast\n#2 Is the East Coast a suburb?\nno\nTherefore, the answer to the original question is True"}
{"prompt":"Context: The Liberty Bell originally was located in Independence Hall in Philadelphia. It was moved to a nearby pavilion to accommodate viewers in 1976.\nQuestion: Is the Liberty Bell still in its original location?\nTake it step by step:","completion":" #1 What was the original location of the Liberty Bell?\nthe steeple of the Pennsylvania State House\n#2 What is the current location of the Liberty Bell?\nLiberty Bell Center\n#3 Is Liberty Bell Center the same as the steeple of the Pennsylvania State House?\nno\nTherefore, the answer to the original question is False"}
{"prompt":"Context: Buddy The Elf is a character from the movie Elf. Buddy The Elf's father works in a Manhattan publishing firm.\nQuestion: Does Buddy The Elf know anyone who works in publishing?\nTake it step by step:","completion":" #1 Which people are known to the movie character Buddy The Elf?\nSanta's elves\n#2 Does any of Santa's elves work in publishing?\nyes\nTherefore, the answer to the original question is True"}
{"prompt":"Context: The post office has several holidays including: New Year's Day, Washington's Birthday (President's Day), and Veterans Day. George Washington was the only US president elected unanimously.\nQuestion: Is unanimously elected president's birthday a break for mail carriers?\nTake it step by step:","completion":" #1 Which US president was elected unanimously?\nWashington\n#2 When is Washington's birthday?\nFebruary 22, 1732\n#3 Is February 22, 1732 a break or holiday for the post office?\nno\nTherefore, the answer to the original question is True"}
{"prompt":"Context: Sea otters prey mostly on marine invertebrates and other aquatic creatures. Spiders are not aquatic creatures and they reside on land.\nQuestion: Does a sea otter eat spiders?\nTake it step by step:","completion":" #1 What are sea otters known to feed on?\nmarine invertebrates\n#2 Are spiders included in marine invertebrates?\nno\nTherefore, the answer to the original question is False"}
{"prompt":"Context: Javier Sotomayor is an athlete that holds the men's high jump world record of slightly over 8 feet. The average cat can jump from 7.5 to 9 feet. Bengal cats have powerful hind legs which make them jump higher than other breeds.\nQuestion: Could a Bengal cat hypothetically best Javier Sotomayor's record?\nTake it step by step:","completion":" #1 How high is Javier Sotomayor's world record high jump?\n2.45 m (8 ft 1⁄4 in)\n#2 Which breed of cat can jump the highest?\ncaracal\n#3 If the average cat can jump up to 9 feet, then caracal can jump higher than what number?\nBengal cat as an active, inquisitive cat that loves to be up high. Most Bengals enjoy playing, chasing, climbing and investigating. In general, Bengals enjoy action. Bengals are generally confident and curious.\n#4 Is Bengal cat as an active, inquisitive cat that loves to be up high. Most Bengals enjoy playing, chasing, climbing and investigating. In general, Bengals enjoy action. Bengals are generally confident and curious. greater than 2.45 m (8 ft 1⁄4 in)?\nno\nTherefore, the answer to the original question is True"}
{"prompt":"Context: Chipotle Cinnamon Pork Chops are a popular recipe made by applying a cinnamon rub to pork chops. The Seder is a Jewish feast day that begins the season of Passover. Pork is forbidden by Jewish kosher laws.\nQuestion: Are Chipotle Cinnamon Pork Chops appropriate for a Seder?\nTake it step by step:","completion":" #1 What kind of event is a Seder?\nritual feast\n#2 Which religious group observes ritual feast?\nJewish\n#3 Which foods are considered appropriate by the dietary restrictions imposed on Jewish?\ncertain types of mammals, birds and fish\n#4 What are the main ingredients of Chipotle Cinnamon Pork Chops?\na rib or part of a vertebra\n#5 Are a rib or part of a vertebra included in certain types of mammals, birds and fish?\nyes\nTherefore, the answer to the original question is False"}
{"prompt":"Context: Carmines is an Italian family-style restaurant. Basil is an essential in Italian cooking.\nQuestion: Would the chef at Carmine's restaurant panic if there was no basil?\nTake it step by step:","completion":" #1 What kind of cuisine does Carmine's serve?\nRestaurant\n#2 Is basil an essential ingredient in Restaurant?\nno\nTherefore, the answer to the original question is True"}
{"prompt":"Context: Brown rice is more expensive than white rice.  Most store bought rice pudding is white in color. Brown rice, when cooked, is light brown in color.\nQuestion: Is most store bought rice pudding made with brown rice?\nTake it step by step:","completion":" #1 Which rice pudding is most commonly purchased in stores?\npudding rice\n#2 What color is pudding rice\nrice puddings grouped by place of origin\n#3 Which types of rice are commonly used to make rice pudding?\nhigh-starch short-grained\n#4 Is the one among high-starch short-grained having color of rice puddings grouped by place of origin brown rice?\nno\nTherefore, the answer to the original question is False"}
{"prompt":"Context: Easy Rider had a filming budget of about half a million dollars. Upon release in 1969, it earned about 60 million dollars.\nQuestion: Did Easy Rider make a profit at the theater when it was released?\nTake it step by step:","completion":" #1 What was the budget of Easy Rider?\n$400,000\n#2 How much did Easy Rider earn upon its release?\n$60 million worldwide\n#3 Is $60 million worldwide greater than $400,000?\nno\nTherefore, the answer to the original question is True"}
{"prompt":"Context: Mail carriers work throughout the year independent of the weather. Mail carriers must often leave their vehicle in various weather conditions.\nQuestion: Do mail carriers need multiple uniforms?\nTake it step by step:","completion":" #1 What seasons do mail carriers work through?\ndaylight or dark\n#2 In order to make it through all of daylight or dark, does one need different clothing pieces?\nno\nTherefore, the answer to the original question is True"}
{"prompt":"Context: Steve Martin is allergic to shellfish. Shrimp are one of the many types of shellfish.\nQuestion: Is Steve Martin someone who would refuse a dish of shrimp pasta?\nTake it step by step:","completion":" #1 What types of food is Steve Martin allergic to?\n. Martin came to public notice in the 1960s as a writer for The Smothers Brothers Comedy Hour\n#2 What type of food is shrimp?\ndecapod crustaceans\n#3 Is decapod crustaceans included in . Martin came to public notice in the 1960s as a writer for The Smothers Brothers Comedy Hour?\nno\nTherefore, the answer to the original question is True"}
{"prompt":"Context: John Key, the 38th Prime Minister of New Zealand, has had one woman succeed him as Prime Minister. John key was preceded by two women as Prime Minister of New Zealand.\nQuestion: As of 2020 have more women succeeded John Key than preceded him?\nTake it step by step:","completion":" #1 Which notable position did John Key occupy?\nPrime Minister of New Zealand\n#2 How many women served as Prime Minister of New Zealand before him?\nthree\n#3 How many women have served as Prime Minister of New Zealand after him?\nthree\n#4 Is three greater than three?\nno\nTherefore, the answer to the original question is False"}
{"prompt":"Context: Methuselah was a biblical figure said to have lived until 969. The Common Era is the years after the BC era and is alternatively referred to as A.D. Jeanne Louise Calment 1875–1997 was the oldest human whose age was well-documented, with a lifespan of 122 years and 164 days.\nQuestion: Would Methuselah hypothetically hold a record in the Common Era?\nTake it step by step:","completion":" #1 Which period is referred to as the Common Era?\nCE) is one of the notation systems for the world's most widely used calendar era\n#2 Who is the oldest human whose age was well documented during CE) is one of the notation systems for the world's most widely used calendar era?\nJeanne Calment\n#3 How old was Jeanne Calment when she died?\n122 years, 164 days\n#4 How old was Methuselah when he died?\n969\n#5 Is 969 greater than 122 years, 164 days?\nno\nTherefore, the answer to the original question is True"}
{"prompt":"Context: Storks are a symbol of the arrival of a new baby. Baby showers are parties held to celebrate a woman who will soon give birth.\nQuestion: Would you be likely to see storks at a baby shower?\nTake it step by step:","completion":" #1 What do storks represent?\nbringing babies to new parents\n#2 Do baby showers celebrate bringing babies to new parents?\nno\nTherefore, the answer to the original question is True"}
{"prompt":"Context: The Viper Room has a capacity of 250 people. The National Diet building has two wings with over 700 seats.\nQuestion: Can Viper Room concert hypothetically be held at National Diet building?\nTake it step by step:","completion":" #1 What is the capacity of the The Viper Room?\nThe Viper Room\n#2 What is the capacity of the National Diet Building?\n722\n#3 Is 722 greater than or equal to The Viper Room?\nyes\nTherefore, the answer to the original question is True"}
{"prompt":"Context: A fever is a medical symptom that elevates the core body temperature.  Eating under cooked meat can cause food poisoning. One of the symptoms of food poisoning is elevated core body temperature. \nQuestion: Can you get a fever from consuming meat?\nTake it step by step:","completion":" #1 What is a fever?\na temperature above the normal range due to an increase in the body's temperature set point\n#2 What can consuming uncooked meat cause?\nTrichinosis\n#3 Is a temperature above the normal range due to an increase in the body's temperature set point a symptom of Trichinosis?\nno\nTherefore, the answer to the original question is True"}
{"prompt":"Context: Ivan the Terrible was the Tsar of Russia from 1530 to 1585.  The Byzantine calendar was the official calendar of the Russian government from 988 to 1700. The Tsar was the leader of the Russian government. \nQuestion: Did Ivan the Terrible use the Byzantine calendar?\nTake it step by step:","completion":" #1 What was Ivan the Terrible's role from 1530 to 1585?\nTsar of Russia\n#2 What country was Ivan the Terrible Tsar of Russia of?\nAll Rus'\n#3 Was the Byzantine calendar the official calendar of All Rus' from 1530 to 1585?\nno\nTherefore, the answer to the original question is True"}
{"prompt":"Context: A Rabbi is a spiritual leader or religious teacher in Judaism. Christmas is a holiday observed by Christians.\nQuestion: Would a Rabbi celebrate Christmas?\nTake it step by step:","completion":" #1 What religion do Rabbis belong to?\nJudaism\n#2 Which religion celebrates Christmas?\nChristian\n#3 Is Judaism the same as Christian?\nno\nTherefore, the answer to the original question is False"}
{"prompt":"Context: Pith is the white part of the clementine fruit between the orange colored peel and the edible fruit. Most people discard the pith after peeling.\nQuestion: Is clementine pith highly sought after?\nTake it step by step:","completion":" #1 What is a pith?\nthe pale, spongy inner layer of the rind\n#2 Do people usually like to keep the pale, spongy inner layer of the rind after peeling?\nno\nTherefore, the answer to the original question is False"}
{"prompt":"Context: The Nepalese Civil War happened in Nepal. Nepal is a country that shares a border with India.\nQuestion: Did the Nepalese Civil War take place near India?\nTake it step by step:","completion":" #1 Where did the Nepalese Civil War take place?\nNepal\n#2 Is Nepal near India?\nno\nTherefore, the answer to the original question is True"}
{"prompt":"Context: Paratroopers use parachutes to glide Parachutes function by creating drag in an atmosphere There is no atmosphere in a vacuum\nQuestion: Can paratroopers be used in a vacuum?\nTake it step by step:","completion":" #1 What equipment do paratroopers use?\na parachute or parachutes\n#2 What does a parachute or parachutes need to create in order to function?\ndrag\n#3 In what does a parachute or parachutes create drag?\nInduced drag\n#4 Is Induced drag present in a vacuum?\nno\nTherefore, the answer to the original question is False"}
{"prompt":"Context: The volume of the Black Sea is 547,000 cubic kilometers. The volume of the moon is 21.9 billion cubic kilometers.\nQuestion: Could the moon fit inside the Black Sea?\nTake it step by step:","completion":" #1 What is the volume of the Black Sea?\n547,000 km3 (131,000 cu mi).\n#2 What is the volume of the moon?\n1,700 km\n#3 Is 547,000 km3 (131,000 cu mi). higher than 1,700 km?\nyes\nTherefore, the answer to the original question is False"}
{"prompt":"Context: A college thesis is a long and complicated written document. R. Kelly claims to be illiterate, which means he cannot read and write. \nQuestion: Could R. Kelly write a college thesis?\nTake it step by step:","completion":" #1 What does writing a college thesis require a person be able to do?\nresearch and findings\n#2 What does R. Kelly claim to be?\nMusically Gifted\n#3 Can someone who is Musically Gifted do research and findings?\nyes\nTherefore, the answer to the original question is False"}
{"prompt":"Context: Chess is a game that is made up of 64 squares. The Japanese game of Shogi requires a total of 81 squares.\nQuestion: Can a chess board be converted to a Shogi board?\nTake it step by step:","completion":" #1 How many squares are on a chessboard?\n64\n#2 How many squares are on a Shogi board?\n81\n#3 Is 64 equal to 81?\nno\nTherefore, the answer to the original question is False"}
{"prompt":"Context: Cesar Millan is a Mexican-American dog trainer with over 25 years of canine experience. The short-eared dog lives in various parts of the rainforest environment, preferring areas with little human disturbance. The short-eared dog is a solitary animal and prefers moving in trees away from human and other animal interactions. The short-eared dog is a wild animal that is not suitable as a pet.\nQuestion: Has Cesar Millan ever tamed a short-eared dog?\nTake it step by step:","completion":" #1 Which kind of dogs does Cesar Millan's train?\nseverely aggressive\n#2 What are the social characteristics of the short-eared dog?\nsolitary\n#3 Does solitary match the characteristics of severely aggressive?\nno\nTherefore, the answer to the original question is False"}
{"prompt":"Context: Eastern Orthodox Church used the Byzantine calendar from c. 691 to 1728 The Byzantine Empire used the Byzantine calendar from c. 988 to 1453\nQuestion: Did the Eastern Orthodox Church and the Byzantine Empire ever use the same calendar?\nTake it step by step:","completion":" #1 What calendar did the Eastern Orthodox Church use from  c. 691 to 1728?\nJulian calendar\n#2 What calendar did the Byzantine Empire use from c. 988 to 1453?\nThe Byzantine calendar\n#3 Is Julian calendar and The Byzantine calendar the same?\nno\nTherefore, the answer to the original question is True"}
{"prompt":"Context: In the year 1900 there were 42 US states. Ancient Greece had several hundred relatively independent city-states called poleis.\nQuestion: Were number of states in Ancient Greece underwhelming compared to US states in 1900?\nTake it step by step:","completion":" #1 How many states were in the United States in 1900?\n46\n#2 How many city-states were there in Ancient Greece?\nseveral hundred\n#3 Is several hundred less than 46?\nno\nTherefore, the answer to the original question is False"}
{"prompt":"Context: Some of the earliest civilizations on record are in river valleys. Early civilizations used water to irrigate crops, leading to the growth of agriculture.\nQuestion: Is the rise of agriculture attributed to rivers?\nTake it step by step:","completion":" #1 What are the basic factors of agricultural production?\nplants and livestock\n#2 Do rivers provide any of plants and livestock?\nyes\nTherefore, the answer to the original question is True"}
{"prompt":"Context: Isopod care is compared to that of a houseplant. Goldfish are notorious for making their tanks dirty quite often.\nQuestion: Are goldfish more difficult to care for than isopods?\nTake it step by step:","completion":" #1 What is isopod care comparable to?\ndiet\n#2 What challenges do Goldfish pose to keepers?\ncompeting for food\n#3 Is diet easier to deal with than competing for food?\nyes\nTherefore, the answer to the original question is True"}
{"prompt":"Context: Mushrooms in the Mario universe are used to provide extra lives and to make Mario grow, providing him an extra hit point.  Mario is made to run faster when he wears bunny ears or uses a starman.\nQuestion: Does Mario use mushrooms to run faster?\nTake it step by step:","completion":" #1 In the Mario Universe what abilities do mushrooms give to Mario when collected?\nincreases Mario's size, turning him into \"Super Mario\", and allows him to break certain blocks\n#2 Is any of increases Mario's size, turning him into \"Super Mario\", and allows him to break certain blocks increased speed?\nyes\nTherefore, the answer to the original question is False"}
{"prompt":"Context: Diabetes is a disease in which the body cannot process sugar. Celery is known as a healthy snack and has 1 gram of sugar per serving. The recommended daily intake of sugar to prevent diabetes is less than 36 grams per day for an adult male. The average weight of an adult male is 197 pounds.\nQuestion: Can eating your weight in celery prevent diabetes?\nTake it step by step:","completion":" #1 If a person has diabetes, what is there body unable to process?\ninsulin\n#2 To prevent diabetes, what is the average amount of insulin an adult man should eat daily in grams?\n.\n#3 How much does the average male weigh in pounds?\n154–183\n#4 How many grams of sugar does a pound of celery have?\nCelery\n#5 Is 154–183 times Celery less than .?\nno\nTherefore, the answer to the original question is False"}
{"prompt":"Context: Spaghetti and meatballs are a staple on Italian pizzeria menus in the US. The Olive Garden, an Italian family restaurant, has several dishes with meatballs. Meatballs originated in the Chinese Qin dynasty (221 BC to 207 BC).\nQuestion: Do restaurants associate meatballs with the wrong country of origin?\nTake it step by step:","completion":" #1 In what country is the oldest evidence of people eating meatballs found?\nQin dynasty\n#2 What dish involving meatballs became popular in the United States after being invented in New York City in the 20th century?\nspaghetti\n#3 With which national cuisine do Americans typically associate spaghetti?\nItaly\n#4 Are Italy and Qin dynasty different?\nno\nTherefore, the answer to the original question is True"}
{"prompt":"Context: A robusto is a short, fat cigar that is very popular in America. The Central Park Zoo has several rules including: no feeding the animals and no smoking. NYPD's 19th precinct is only an 11 minute walk away from the Central Park Zoo.\nQuestion: Would it be wise to bring a robusto into Central Park Zoo?\nTake it step by step:","completion":" #1 What is a robusto?\nA cigar\n#2 According to the rules, what can you not bring into The Central Park Zoo?\nsmoking\n#3 Is A cigar not in smoking?\nno\nTherefore, the answer to the original question is False"}
{"prompt":"Context: The Great Pyramids were built by the Ancient Egyptians. A theocracy is a government that is led by religious leaders or who worships their leader as a god. The Pharaohs of Ancient Egypt were worshipped as children of the Sun god Ra.\nQuestion: Were the Great Pyramids built by a theocratic government?\nTake it step by step:","completion":" #1 Who were the builders of the Great Pyramids?\nFourth Dynasty of the Old Kingdom of Ancient Egypt\n#2 How did Fourth Dynasty of the Old Kingdom of Ancient Egypt serve their leaders?\nofferings and prayers\n#3 Could offerings and prayers be described as a theocracy?\nyes\nTherefore, the answer to the original question is True"}
{"prompt":"Context: Glue is toxic and not used in food production. Sesame seeds add texture and visual appeal to hamburger buns. Beaten eggwhites are often used to adhere foods to other foods. \nQuestion: Are sesame seeds glued onto hamburger buns?\nTake it step by step:","completion":" #1 What do people usually do with hamburger buns?\nsesame seed\n#2 Can you sesame seed sesame seeds?\nyes\nTherefore, the answer to the original question is False"}
{"prompt":"Context: Tickle Me Elmo was first popular in 1996. Snoop Dogg would have been 25 when the Tickle Me Elmo craze took off.\nQuestion: Was Snoop Dogg an adult when Tickle Me Elmo was popular?\nTake it step by step:","completion":" #1 In what year did Tickle Me Elmo become popular?\n1997\n#2 In what year was Snoop Dogg born?\n1971\n#3 What is the difference between 1997 and 1971?\nyes\n#4 Is yes greater than or equal to 18?\nno\nTherefore, the answer to the original question is True"}
{"prompt":"Context: James Watson studied the double helix with Francis Crick. Francis Crick passed away in 2004 at 88 years of age. James Watson is alive and is 92 years old.\nQuestion: Did James Watson's partner in studying the double helix outlive him? \nTake it step by step:","completion":" #1 Who did James Watson study the double helix with?\nFrancis Crick\n#2 How old was Francis Crick at their death?\n28 July 2004\n#3 How old is James Watson currently?\nKBE\n#4 Is 28 July 2004 greater than KBE?\nno\nTherefore, the answer to the original question is False"}
{"prompt":"Context: 83% of blacks in the US identify as Christians.  In the United States, blacks are less likely than other ethnic groups to be religiously unaffiliated, let alone identifying as atheist. African American history, slavery and the civil rights movement are all closely tied to Christianity in America.\nQuestion: Can atheism surpass Christianity in American black communities by 2021?\nTake it step by step:","completion":" #1 What is the population of black Americans?\nabout 30 million\n#2 How many out of about 30 million follow a religion?\none half of one-percent\n#3 Is one half of one-percent close to or less than 50%?\nyes\nTherefore, the answer to the original question is False"}
{"prompt":"Context: 5 is a prime number A Grammy Award trophy is a gilded gramophone Led Zeppelin won 5 Grammy Awards\nQuestion: Did the band Led Zeppelin own a prime number of gilded gramophones?\nTake it step by step:","completion":" #1 What award has a trophy which consists of a gilded gramophone?\nGrammy Award\n#2 How many Grammy Award have Led Zeppelin won?\nfour\n#3 Is four a prime number?\nno\nTherefore, the answer to the original question is True"}
{"prompt":"Context: Doctors of Homeopathy are practitioners of \"alternative medicine\"  In alternative medicine practices, Quartz is believed to have powers. Doctors of Internal Medicine have completed a medical residency and do not recommend alternative medicine.\nQuestion: Are Doctors of Homeopathy more likely than Doctors of Internal Medicine to recommend Quartz as a treatment?\nTake it step by step:","completion":" #1 What do doctors of homeopathy practice?\nhitting and\/or violently shaking the product\n#2 What is Quartz believed to have in hitting and\/or violently shaking the product?\nhealing powers\n#3 What do doctors of internal medicine study?\ninternal diseases\n#4 Are hitting and\/or violently shaking the product or healing powers not included in internal diseases?\nyes\nTherefore, the answer to the original question is True"}
{"prompt":"Context: The Stanley Cup Finals is the last series in hockey each year. Hockey rinks are indoors and require ice for players to skate on. Rock in Rio is a massive outdoor music festival in Brazil. Rock in Rio takes place in June each year. The temperature in Brazil during June averages around 80F.\nQuestion: Would it be difficult to host Stanley Cup Finals at Rock in Rio?\nTake it step by step:","completion":" #1 Which sport has the Stanley Cup Finals?\nNational Hockey League (NHL) playoff winner. It is the oldest existing trophy to be awarded to a professional sports franchise in North America, and the International Ice Hockey\n#2 Which kind of surface is required to play National Hockey League (NHL) playoff winner. It is the oldest existing trophy to be awarded to a professional sports franchise in North America, and the International Ice Hockey?\nice\n#3 What time of the year does Rock in Rio take place, and where?\n30 Anos\n#4 Do weather conditions in 30 Anos at that time not favor the formation of ice?\nyes\nTherefore, the answer to the original question is True"}
{"prompt":"Context: In New York, fall begins during the month of September.  When the weather gets cooler in the fall, leaves begin to change colors. \nQuestion: Would the trees in Auburn, New York be changing colors in September?\nTake it step by step:","completion":" #1 In the month of September, what season would it be in New York?\nsummer\n#2 Do trees change color during summer?\nyes\nTherefore, the answer to the original question is True"}
{"prompt":"Context: Male macaques range from 16 to 28 inches tall with a weight between 12.13 to 39.7 pounds. Elephants are between 7 to 11 feet tall and weigh several thousand pounds. Elephants contain large, sharp tusks that can injure or kill other animals.\nQuestion: Could an elephant easily defeat a male macaque?\nTake it step by step:","completion":" #1 How much does a male macaques weigh?\n5.5 to 18 kg (12.13 to 39.7 lb).\n#2 How much can an elephant weigh?\n5.2–6.9 t\n#3 How tall is a male macaque?\n41 to 70 cm (16 to 28 inches)\n#4 How tall is an elephant?\n304–336 cm\n#5 Is 5.2–6.9 t more than 5.5 to 18 kg (12.13 to 39.7 lb). and is 304–336 cm more than 41 to 70 cm (16 to 28 inches)?\nno\nTherefore, the answer to the original question is True"}
{"prompt":"Context: Pedubastis I was a pharaoh that died in 800 BC Japan's origins are in 600 BC according to a letter of the Sui dynasty. Pedubastis I ruled over the country of Egypt.\nQuestion: Did Pedubastis I know Japanese people?\nTake it step by step:","completion":" #1 When did Pedubastis I die?\n804 BCE\n#2 When did the nation of Japan form?\nHan Dynasty\n#3 Is Han Dynasty before 804 BCE?\nno\nTherefore, the answer to the original question is False"}
{"prompt":"Context: Cattle are often slaughtered for meat and other products, like leather. Drums are often made with leather.\nQuestion: Would a cattle farmer be useful to a drum maker?\nTake it step by step:","completion":" #1 Which animal products would a drum maker need?\nanimal hide\n#2 Are animal hide commonly obtained from cattle?\nyes\nTherefore, the answer to the original question is True"}
{"prompt":"Context: Jalapeno peppers contain capsaicin.  Capsaicin creates a burning sensation in the eyes and can lead to surface injuries.  Small children do not understand how to protect themselves from peppers or how to wash their hands properly.\nQuestion: Can children be hurt by jalapeno peppers?\nTake it step by step:","completion":" #1 What do Jalapeno peppers contain?\n92% water, 6% carbohydrates, 1% protein\n#2 Can 92% water, 6% carbohydrates, 1% protein cause injuries to a child if they are not careful?\nno\nTherefore, the answer to the original question is True"}
{"prompt":"Context:  Vice President Aaron Burr fatally wounded Alexander Hamilton in a duel on July 11, 1804. Aaron Burr continued his term as Vice President of the United States after killing Alexander Hamilton. US stand-your-ground laws allow a person to defend themselves even to the point of applying lethal force.\nQuestion: Can Vice President of the United States kill with impunity?\nTake it step by step:","completion":" #1 What was the outcome of Vice President Aaron Burr's duel in July, 1804?\nHamilton's death\n#2 DidHamilton's death lead to loss of his opponent's life and did he continue his term afterwards?\nno\nTherefore, the answer to the original question is True"}
{"prompt":"Context: Amtrak's Acela Express is the fastest train in the Western Hemisphere and can reach 150 mph. A US Navy plane would need to travel 770 mph to break the sound barrier.\nQuestion: Can Amtrak's Acela Express break the sound barrier?\nTake it step by step:","completion":" #1 What is the maximum speed of Amtrak's Acela Express?\n150 mph\n#2 What is the minimum speed needed to break the sound barrier?\nMach 1\n#3 Is 150 mph greater than or equal to Mach 1?\nno\nTherefore, the answer to the original question is False"}
{"prompt":"Context: The Legend of Robin Hood tells of an archer that stole from the rich and gave to the poor. Robin Hood's main antagonist is the Sheriff of Nottingham. The Sheriff of Nottingham is an agent for Prince John who has usurped the throne from his brother Richard. Richard I was King of England from 1189-1199. Prince John became John, King of England and reigned from 1199-1216.\nQuestion: Are all characters in Legend of Robin Hood fictional?\nTake it step by step:","completion":" #1 Who is Robin Hood's main antagonist in the Legend of Robin Hood?\nSheriff of Nottingham\n#2 Who is Sheriff of Nottingham's employer?\nPrince John\n#3 Who is Prince John's brother who was usurped from the throne by him?\nKing Richard I\n#4 Are Prince John and King Richard I completely fictional characters?\nno\nTherefore, the answer to the original question is False"}
{"prompt":"Context:  3% of the β-carotene in raw carrots is released during digestion, which can be improved to 39% by pulping, cooking and adding cooking oil Retinal is a form of Vitamin A Human bodies break down β-carotene into retinal\nQuestion: Are raw carrots better for maximizing vitamin A intake?\nTake it step by step:","completion":" #1 What is the source of Vitamin A in carrots?\nα- and β-carotenes\n#2 Is absorption of α- and β-carotenes reduced by cooking?\nno\nTherefore, the answer to the original question is False"}
{"prompt":"Context: Radioactive isotopes in an ooze-like waste cause turtles to become the Teenage Mutant Ninja Turtles. In the Fox animated hit, Family Guy, radioactive waste is used to turn give the main characters superpowers.  The superhero 'Daredevil' encounters radioactive waste that blinds him as a child and gives him super powers.\nQuestion: Is radioactive waste a plot device for many shows?\nTake it step by step:","completion":" #1 What turned turtles into mutant turtles in Teenage Mutant Ninja Turtles?\ntoxic waste\n#2 Which substance gives the main characters of Family Guy superpowers?\nSuper Bowl XXXIII\n#3 Which substance gave Daredevil his super powers?\nradioactive\n#4 Are toxic waste. Super Bowl XXXIII and radioactive radioactive waste?\nyes\nTherefore, the answer to the original question is True"}
{"prompt":"Context: A firewall is not a physical entity and only exists on a network. Hammers cannot be used to destroy non-physical entities.\nQuestion: Could a firewall be destroyed by a hammer?\nTake it step by step:","completion":" #1 What enables firewall software to work on a computer?\nNPF\n#2 Can NPF be physically removed from a computer?\nNetwork-based firewalls are positioned on the gateway computers of LANs, WANs and intranets\n#3 Can a hammer do Network-based firewalls are positioned on the gateway computers of LANs, WANs and intranets?\nno\nTherefore, the answer to the original question is False"}
{"prompt":"Context: Mexico is an independent country located in  North America. New Mexico is a state located in the United States. US laws require a voter to be a citizen of the United States. The President of Mexico in 2020, Andrés Manuel López Obrador, is a Mexican citizen.\nQuestion: Can the President of Mexico vote in New Mexico primaries?\nTake it step by step:","completion":" #1 What is the citizenship requirement for voting in US states such as New Mexico?\neighteen years or older\n#2 What is the citizenship requirement of any President of Mexico?\nnatural-born\n#3 Is natural-born the same as eighteen years or older?\nyes\nTherefore, the answer to the original question is False"}
{"prompt":"Context: The first Samsung Galaxy device ran a version of Android from 2009. In 2009, the Android edition was called \"cupcake.\" \nQuestion: Would the operating system of a Samsung Galaxy 1 sound edible?\nTake it step by step:","completion":" #1 What are the operating systems of a Samsung Galaxy 1?\nAndroid\n#2 Does Android sound like something that is edible?\nyes\nTherefore, the answer to the original question is True"}
{"prompt":"Context: Soulseek is a computer program used to illegally share music files Metallica has been outspoken in their opposition of digital piracy\nQuestion: Does Metallica use Soulseek?\nTake it step by step:","completion":" #1 Does Soulseek enable users to illegally share music files?\nSoulseek claims to be against copyright violation\n#2 Does Metallica encourage illegal sharing of digital files?\nMetallica led the case against the peer-to-peer file sharing service Napster\n#3 Are the answers to Soulseek claims to be against copyright violation and Metallica led the case against the peer-to-peer file sharing service Napster the same?\nyes\nTherefore, the answer to the original question is False"}
{"prompt":"Context: Monks are members of religious orders that usually take vows of poverty, chastity, and obedience. The Knights Templar were a religious order that fought during the Crusades and captured Jerusalem in 1099. Buddhist Shaolin monks developed very powerful martial arts skills, have defended temples during conquests.\nQuestion: Are monks forbidden from engaging in warfare?\nTake it step by step:","completion":" #1 What role did the Knights Templar play during the Crusades?\namong the most skilled fighting units\n#2 What role have Shaolin monks played at temples during conquests?\npatron saint\n#3 Did among the most skilled fighting units or patron saint not involve warfare?\nyes\nTherefore, the answer to the original question is False"}
{"prompt":"Context: A minotaur is a mythological creature with the head of a bull and the body of a human. The tibia is the bone between the knee and the ankle in humans. Tibia injuries are common injuries in contact sports such as football.\nQuestion: Can a minotaur hypothetically injure a tibia playing football?\nTake it step by step:","completion":" #1 What is the body structure of a Minotaur?\nthe body of a man\n#2 Where in the human body is the tibia located?\nmedial side of the leg\n#3 Does the body of a man account for the presence of medial side of the leg in a Minotaur?\n\n#4 Are injuries to medial side of the leg common during football?\nIt is more common in athletes\n#5 Are  and It is more common in athletes positive\nno\nTherefore, the answer to the original question is True"}
{"prompt":"Context:  King Ferdinand and Queen Isabella funded Columbus' voyage to the New World. King Ferdinand of Argon and Queen Isabella of Castille were the joint rulers of kingdoms of the Iberian Peninsula, which included modern-day Spain but excludes Portugal.  King John II of Portugal rejected Columbus' request for funding. \nQuestion: Did Columbus obtain his funding from the rulers of the Portugese Empire?\nTake it step by step:","completion":" #1 Which major voyage did Columbus require funding to embark upon?\nfourth voyage\n#2 Who funded fourth voyage?\nQueen Isabella I and King Ferdinand II\n#3 Which kingdoms did Queen Isabella I and King Ferdinand II rule over?\nSpain\n#4 Is the Portuguese Empire included in Spain?\nno\nTherefore, the answer to the original question is False"}
{"prompt":"Context: Shrimp becomes tough and rubbery if cooked for a long time. The ideal texture for shrimp is soft and easily chewed.\nQuestion: Do shrimp taste best when cooked for a long time?\nTake it step by step:","completion":" #1 What happens when shrimp is cooked for a long time?\nthey have a tough and rubbery texture\n#2 What is the ideal texture for shrimp?\nlight and fragrant\n#3 Are they have a tough and rubbery texture and light and fragrant the same?\nno\nTherefore, the answer to the original question is False"}
{"prompt":"Context: Birdwatching is a recreational activity in which people observe and\/or listen to the sounds of birds. Despite their name, the Philadelphia Eagles are a professional American Football team comprised of humans, not birds.\nQuestion: Would a birdwatcher pursue their hobby at a Philadelphia Eagles game?\nTake it step by step:","completion":" #1 What is a birdwwatcher interested in watching?\npublic webcams\n#2 What kind of sport does the Philadelphia eagles play?\nAmerican football\n#3 Can public webcams be found at American football?\nyes\nTherefore, the answer to the original question is False"}
{"prompt":"Context: Cantonese is a dialect of Chinese language used in southern China. There is no relation to the Japanese language.\nQuestion: Is Cantonese spoken in Japan?\nTake it step by step:","completion":" #1 Where is Cantonese widely spoken?\nVietnam\n#2 Is Japan included in Vietnam?\nno\nTherefore, the answer to the original question is False"}
{"prompt":"Context: Language involves grammar and vocabulary Ants have not shown any understanding of grammar Apes include humans who use language to communicate\nQuestion: Do ants outperform apes on language ability?\nTake it step by step:","completion":" #1 What faculties are required for language?\nhuman\n#2 Which of human do ants possess?\nhymenopteran groups\n#3 Which of human do apes possess?\nImitation\n#4 Does hymenopteran groups have more overlap with human than Imitation does?\nyes\nTherefore, the answer to the original question is False"}
{"prompt":"Context: Tonsure is the practice of cutting or shaving some or all of the hair on the scalp as a sign of religious devotion or humility. Christopher Hitchens was an anti-theist, and he regarded all religions as false, harmful, and authoritarian.\nQuestion: Would Christopher Hitchens be very unlikely to engage in tonsure?\nTake it step by step:","completion":" #1 What were Christopher Hitchens' views on religion?\nantitheist\n#2 What is the purpose of tonsure?\na sign of religious devotion or humility\n#3 Would a proponent of antitheist have a negative opinion of a sign of religious devotion or humility?\nyes\nTherefore, the answer to the original question is True"}
{"prompt":"Context: Menthol is the chemical in mint products that give mint its characteristic cool and tangy taste. Peppermint is a popular candy flavor during Christmas season.\nQuestion: Is menthol associated with Christmas?\nTake it step by step:","completion":" #1 What is a popular candy flavor during Christmas?\npeppermint\n#2 Is menthol an ingredient in peppermint?\nyes\nTherefore, the answer to the original question is True"}
{"prompt":"Context: A straight edge lifestyle requires abstaining from the usage of recreational drugs or alcohol. Snoop Dogg is famous for his chronic usage of marijuana.\nQuestion: Does Snoop Dogg advocate a straight edge lifestyle?\nTake it step by step:","completion":" #1 What is the position of the straight edge advocates on recreational drugs?\nrefrain\n#2 What is Snoop Dogg's position on recreational drugs?\navowed cannabis smoker\n#3 Is refrain the same as avowed cannabis smoker?\nno\nTherefore, the answer to the original question is False"}
{"prompt":"Context: In 2009, Charla Nash was attacked and nearly killed by a chimpanzee.  While a different species, Gorillas and Chimpanzees have similar physical appearances and are both primates.\nQuestion: Is it expected that Charla Nash would be anxious near a gorilla?\nTake it step by step:","completion":" #1 Which animal attacked Charla Nash in 2009?\nTravis\n#2 Does Travis bear significant similarity to a gorilla?\nno\nTherefore, the answer to the original question is True"}
{"prompt":"Context: Oysters are an excellent source of zinc. ADHD is  a mental disorder of the neurodevelopmental type characterized by difficulty paying attention. Zinc supplementation has been reported to improve symptoms of ADHD and depression.\nQuestion: Should oysters be avoided by people with ADHD?\nTake it step by step:","completion":" #1 Which metal are oysters are known to be an excellent source of?\nzinc\n#2 Is the consumption of zinc known to worsen symptoms of ADHD?\nno\nTherefore, the answer to the original question is False"}
{"prompt":"Context: Magnus Carlsen is a chess grandmaster from Norway There are no KFC locations in Norway\nQuestion: Does Magnus Carlsen enjoy KFC?\nTake it step by step:","completion":" #1 What country is Magnus Carlsen from?\nNorwegian\n#2 In what countries does KFC have a location?\n136\n#3 Is Norwegian included in 136?\nno\nTherefore, the answer to the original question is False"}
{"prompt":"Context: Wembley stadium has a capacity of 90,000 people. The Mongols were an ethnic group that dominated the 13th and 14th centuries. Genghis Khan was the founder of the Mongol Empire. Geneticists have determined that 1 in every 200 men are descended from Genghis Khan.\nQuestion: Would a packed Wembley stadium be likely to have a descendant of the Mongols inside?\nTake it step by step:","completion":" #1 What is the capacity of the Wembley stadium?\n90,000 seats\n#2 Who is the founder of the Mongol empire?\nGenghis Khan\n#3 What is the minimum number of men within which at least one descendant of Genghis Khan is found?\n16 million\n#4 Is 90,000 seats divided by 16 million greater than or equal to one?\nyes\nTherefore, the answer to the original question is True"}
{"prompt":"Context: Oculudentavis was a dinosaur that resembled a tiny bird with a half an inch skull. The Allosaurus was a carnivorous dinosaur with teeth described as saws.\nQuestion: Is Oculudentavis more dangerous than Allosaurus?\nTake it step by step:","completion":" #1 What were the characteristics of the Oculudentavis?\navialan dinosaur\n#2 What were the characteristics of the Allosaurus?\nlarge bipedal predator\n#3 Are avialan dinosaur more likely to cause harm than large bipedal predator?\nyes\nTherefore, the answer to the original question is False"}
{"prompt":"Context: Smooth jazz is an offshoot of jazz music that relies on a more melodic form. Smooth jazz employs the following instruments: saxophone. guitar. piano. trumpet. synthesizer. electric bass. and drums. James Cotton was a famous blues harmonica player.\nQuestion: Would James Cotton's instrument be too strident for a smooth jazz band?\nTake it step by step:","completion":" #1 What instument is James Cotton known for?\nharmonica playing\n#2 What instuments are used to play Smooth Jazz?\nmelodic form\n#3 Is harmonica playing not  one of melodic form?\nno\nTherefore, the answer to the original question is True"}
{"prompt":"Context: Tearjerkers typically refer to a genre of movie.  United Airlines flight 93 was involved in a terrorist attack in 2001. Several flights memorialize the passengers of Flight 93,.\nQuestion: Are there tearjerkers about United Airlines flights?\nTake it step by step:","completion":" #1 What do tearjerkers refer to?\nsomething that provokes sadness or pathos\n#2 Which United Airlines flight was involved in a terrorist attack in 2001?\n175\n#3 Are there any something that provokes sadness or pathos in memory of the passengers of 175?\nyes\nTherefore, the answer to the original question is True"}
{"prompt":"Context: Rabbis are teachers of Judaism. Ranavalona I, ruler of Madagascar, killed many Christians that were later determined by the church to be martyrs. Judaism does not have a group of saints and martyrs that are prayed to like Christianity..\nQuestion: Would a rabbi worship martyrs Ranavalona I killed?\nTake it step by step:","completion":" #1 Which religion are rabbis teachers of?\nJudaism\n#2 Which religion were the matyrs killed by Ranavalona I adherents of?\nChristianity\n#3 Do adherent of Judaism worship matyrs like those of Christianity?\nno\nTherefore, the answer to the original question is False"}
{"prompt":"Context: Mercury is used in thermometers Thermometers are used in taking body temperature High temperature or fever is one symptom of coronavirus\nQuestion: Does Mercury help detect coronavirus?\nTake it step by step:","completion":" #1 What are the basic symptoms of coronavirus?\nfever, cough, rhinitis, sore throat, hoarseness, bronchitis, bronchiolitis, pneumonia, and croup\n#2 Which instrument is used to measure a symptom among fever, cough, rhinitis, sore throat, hoarseness, bronchitis, bronchiolitis, pneumonia, and croup that can be measured?\nthermometer\n#3 Does a type of thermometer use mercury?\nyes\nTherefore, the answer to the original question is True"}
{"prompt":"Context: The Jackson 5 has sold over 100 million albums worldwide. The Eisley Brothers have sold over 18 million albums. The Jackson 5 consisted of Jackie, Tito, Jermaine, Marlon and Michael. The Isley Brothers consisted of brothers O'Kelly, Rudolph. Ronald, and Vernon.\nQuestion: Was The Jackson 5 bigger family band than The Isley Brothers?\nTake it step by step:","completion":" #1 How many albums has the Jackson 5 sold?\nmore than 100 million\n#2 How many albums has the Eisley Brothers sold?\nover 18 million\n#3 How many people were in the Jackson 5?\n5\n#4 How many people made up the Eisley Brothers?\nsix\n#5 Is more than 100 million greater than over 18 million and is 5 greater than six?\nyes\nTherefore, the answer to the original question is True"}
{"prompt":"Context: Starbucks Passion tea features cinnamon, apple, licorice root, and lemongrass flavors. Ginger is a spicy flavored plant. Starbucks Passion tea is a sweet drink.\nQuestion: Does a Starbucks passion tea have ginger in it?\nTake it step by step:","completion":" #1 What ingredients are in the Starbucks Passion Tea?\nSarbucks\n#2 Is ginger part of Sarbucks?\nno\nTherefore, the answer to the original question is False"}
{"prompt":"Context: Shivambu is another term for 'Urine Therapy', an alternative belief about healing with urine. Human urine contains ammonia. Shivambu practitioners believe that ingesting urine is healthy.\nQuestion: Do Shivambu practitioners believe ammonia is unhealthy?\nTake it step by step:","completion":" #1 What is another term for Shivambu?\nurotherapy\n#2 What did urotherapy believe could have healing properties?\nurine\n#3 Is urine void of ammonia?\nno\nTherefore, the answer to the original question is False"}
{"prompt":"Context: Grapefruit is a citrus fruit consumed mostly during the summer months. Chemicals in grapefruit can interact with medications such as statins. Grapefruit can lead to too much absorption of statin medicine. Too much statins can cause severe muscle pain, liver damage, kidney failure and death. \nQuestion: Can eating grapefruit kill besides allergies or choking?\nTake it step by step:","completion":" #1 What health risks associated with eating grapefruit could lead to death?\ndrug overdose toxicity\n#2 Is drug overdose toxicity more than just allergy and choking?\nno\nTherefore, the answer to the original question is True"}
{"prompt":"Context: Polyamorous people are those who seek to have an intimate relationship with more than one partner. In relationships, untreated jealousy typically leads to a breakup.\nQuestion: Should someone prone to jealousy be in a polyamorous relationship?\nTake it step by step:","completion":" #1 What kind of relationship would a polyamorous person engage in?\nintimate relationships with more than one partner, with the informed consent of all partners involved. It has been described as \"consensual, ethical, and responsible non-monogamy\". People who identify as polyamorous believe in an open relationship\n#2 Would a jealous person be comfortable with intimate relationships with more than one partner, with the informed consent of all partners involved. It has been described as \"consensual, ethical, and responsible non-monogamy\". People who identify as polyamorous believe in an open relationship?\nno\nTherefore, the answer to the original question is False"}
{"prompt":"Context: The Early Eastern Canadian Natives were a group of people that spoke the Inuktitut language. The Inuktitut language began as an oral language with no letters, only uvular sounds. The later Inuktitut language has no letters that resemble the Latin alphabet.\nQuestion: Would early Eastern Canadian Natives language have use of the letter B?\nTake it step by step:","completion":" #1 What language did Eastern Canadian Natives speak?\nInuktitut\n#2 What kind of language is Inuktitut?\naboriginal\n#3 Does aboriginal involve the use of letters?\nyes\nTherefore, the answer to the original question is False"}
{"prompt":"Context: Door to door advertising involves someone going to several homes in a residential area to make sales and leave informational packets. During the COVID-19 pandemic, the CDC recommends that people limit their travel to essential needs only. During the COVID-19 pandemic, citizens are advised to stay home and to limit their interaction with others. During the COVID-19 pandemic, people are encouraged to remain six feet away from each other at all times. The more people that someone interacts with, the higher the likelihood of them becoming a vector for the COVID-19 virus.\nQuestion: During the pandemic, is door to door advertising considered inconsiderate?\nTake it step by step:","completion":" #1 What does door to door advertising involve a person to do?\nwalk from the door of one house to the door of another\n#2 During the COVID-19 pandemic, what does the CDC advise people to do in terms of traveling?\nwear cloth face coverings\n#3 During the COVID-19 pandemic, what does the CDC advise people to do in terms of interaction with others?\nsocial distancing\n#4 Does doing walk from the door of one house to the door of another go against wear cloth face coverings and social distancing?\nyes\nTherefore, the answer to the original question is True"}
{"prompt":"Context: Mickey Mouse is a Disney character that has starred in numerous movies and TV specials. Mickey Mouse wears a pair of red pants and never wears a shirt. Zazzle is a website that specializes in custom T-shirts.\nQuestion: Is Mickey Mouse hypothetically unlikely to make a purchase at Zazzle?\nTake it step by step:","completion":" #1 What clothing pieces does Micky Mouse typically wear?\nred shorts, large yellow shoes, and white gloves\n#2 What clothing pieces does Zazzle specialize in?\nretail apparel\n#3 Is there no overlap between red shorts, large yellow shoes, and white gloves and retail apparel?\nyes\nTherefore, the answer to the original question is True"}
{"prompt":"Context: Linus Torvald has a family consisting of five people including his wife and children. The Maruti Suzuki Baleno is and Indian car that can seat five people.\nQuestion: Is Maruti Suzuki Baleno an efficient car for Linus Torvald's family?\nTake it step by step:","completion":" #1 How many people can sit in a  Maruti Suzuki Baleno?\nOnly one\n#2 How many people are in Linus Torvald's family?\nthree\n#3 Is Only one at least equal or greater than three?\nno\nTherefore, the answer to the original question is True"}
{"prompt":"Context: The Black Lives Matter movement is a social movement advocating for racial equality. Benjamin Franklin, a famous founding father, has his image on many monuments and on American currency. Members of the Black Lives Matter movement petitioned for statues of Christopher Columbus to be removed due to his subjugation of Native Americans. Benjamin Franklin's 1730s newspaper, The Philadelphia Gazette, posted ads for black slaves. Benjamin Franklin owned two slaves, George and King, who worked as personal servants.\nQuestion: Is Benjamin Franklin a prime candidate to have his statues removed by Black Lives Matter movement?\nTake it step by step:","completion":" #1 What social issue motivates the Black Lives Matter movement?\nracial justice\n#2 Did Benjamin Franklin act against achieving racial justice?\nyes\nTherefore, the answer to the original question is True"}
{"prompt":"Context: Controlled substance prescriptions can require an ID for pickup depending on state law. Non controlled substances can be picked up without ID by anybody who knows the patient information. State laws regarding pharmacies ID restrictions are not the same across the country.\nQuestion: Is ID required to get all medications from all pharmacies?\nTake it step by step:","completion":" #1 Which category of medications usually require an ID for pickup?\nprescription drugs\n#2 What are the regulations guiding prescription drugs across states in the US?\nThe Uniform Controlled Substances Act\n#3 Are The Uniform Controlled Substances Act the same across all states?\nno\nTherefore, the answer to the original question is False"}
{"prompt":"Context: The company is renaming itself Stellantis following the completion of its merger. There are 14 automobile brands owned by the company, which will be keeping their names and logos.\nQuestion: Is Fiat Chrysler gaining a new overall corporate identity?\nTake it step by step:","completion":" #1 What plans are underway as regards naming after the completion of the Fiat Chrysler merger?\ngroup branding\n#2 Does group branding involve a change of the collective corporate identity?\nyes\nTherefore, the answer to the original question is True"}
{"prompt":"Context: Rudyard Kipling's 1894 book The Jungle Book has was adapted into several Disney films. The 2016 film The Jungle Book grossed over 966 million dollars. Disney's 1967 film version of The Jungle Book grossed over 378 million dollars. The Jungle Book was not a worldwide phenomenon in Kipling's time.\nQuestion: Did Disney get most of Rudyard Kipling's The Jungle Book profits?\nTake it step by step:","completion":" #1 When did Rudyard Kipling write \"The Jungle Book\"?\n1894\n#2 The 1967 and 2016 adaptations of the book was produced by which media company?\nWalt Disney Pictures\n#3 When did Walt Disney Pictures produce these movies?\n2003\n#4 Is 2003 several decades after 1894 and Walt Disney Pictures the same as Disney?\nno\nTherefore, the answer to the original question is True"}
{"prompt":"Context: The average human has two kidneys. Only one kidney is required to function as a healthy person. Living organ donors will sometimes donate their spare kidney to someone experiencing failure of both their kidneys.\nQuestion: Does an organ donor need to be dead to donate a kidney?\nTake it step by step:","completion":" #1 How many kidneys does the average person have?\n12\n#2 How many kidneys does a person require to function?\none\n#3 Is 12 the same as one?\nno\nTherefore, the answer to the original question is False"}
{"prompt":"Context: Glass vibrates at its resonant frequency which is around a middle C note. Kelly Clarkson has an impressive three octave vocal range. Kelly Clarkson's Never Enough is in the key of A-flat. A-flat is above middle C in terms of notes.\nQuestion: Would Kelly Clarkson's voice shake glass?\nTake it step by step:","completion":" #1 At what note would glass start to vibrate?\nresonant frequency) Friction idiophones, such as making a glass object (glass, bottle, vase) vibrate by rubbing around its rim with a fingertip\n#2 In Kelly Clarkson's song Never Enough, what key is the song sung in?\nG minor\n#3 Is G minor above resonant frequency) Friction idiophones, such as making a glass object (glass, bottle, vase) vibrate by rubbing around its rim with a fingertip?\nno\nTherefore, the answer to the original question is True"}
{"prompt":"Context: Railroad engineers work on trains and railway systems NASCAR events feature automobile races\nQuestion: Is a railroad engineer needed during NASCAR events?\nTake it step by step:","completion":" #1 On what kind of transportation do railroad engineers work?\nlocomotive\n#2 NASCAR involves what kind of transportation?\nstock-car\n#3 Is locomotive and stock-car the same?\nno\nTherefore, the answer to the original question is False"}
{"prompt":"Context: Crane are a type of bird.  Slamdunking is a basketball maneuver in which the player puts the basketball in the basket with one or two hands above the rim. Birds don't have hands.\nQuestion: Can crane slamdunk?\nTake it step by step:","completion":" #1 What is a slamdunk?\na type of basketball shot\n#2 What body parts are needed to perform a type of basketball shot?\none or both hands\n#3 Do cranes have one or both hands?\nyes\nTherefore, the answer to the original question is False"}
{"prompt":"Context: The Qwerty layout was originally developed for mechanical typewriters in the 1870s. ENIAC was considered to be the first computer, built in the late 1940s.\nQuestion: Did the Qwerty keyboard layout predate computers?\nTake it step by step:","completion":" #1 When was the QWERTY keyboard layout developed?\n1873\n#2 When was the modern computer invented?\n1970s\n#3 Is 1873 before 1970s?\nno\nTherefore, the answer to the original question is True"}
{"prompt":"Context: Alexander Hamilton died in 1804. The first published depiction of a koala was in 1810.\nQuestion: Would Alexander Hamilton have known about koalas?\nTake it step by step:","completion":" #1 When were Koalas first sighted?\n26 January 1798\n#2 When did Alexander Hamilton die?\nJuly 12, 1804\n#3 Is 26 January 1798 before July 12, 1804?\nno\nTherefore, the answer to the original question is False"}
{"prompt":"Context: The three smallest bone in the body are malleus, incus, and stapes. Malleus, incus, and stapes are located in the ear. The femur is the largest bone in the body. The femur is located in the leg. The torso is located in the center of the body.\nQuestion: Will the torso be safe from blows to the largest and smallest bones in body?\nTake it step by step:","completion":" #1 Which part of the human body is the torso?\nthe central part or core\n#2 Which is the largest and smallest bone in the human body?\nfemur or thigh-bone\n#3 Where are femur or thigh-bone located?\nhip musculature\n#4 Is any of hip musculature part of the central part or core?\nno\nTherefore, the answer to the original question is True"}
{"prompt":"Context: The Dalai Lama is the spiritual leader of Tibetan Buddhism The divine barzakh is a concept from Islam\nQuestion: Does the Dalai Lama believe in the divine barzakh?\nTake it step by step:","completion":" #1 What religion contains the concept of the divine barzakh?\nJudaism\n#2 Is the Dalai Lama a member of Judaism?\nyes\nTherefore, the answer to the original question is False"}
{"prompt":"Context: Pig Latin is based on English. It is formed by moving consonants and syllables. Real Latin is a separate language distinct from English.\nQuestion: Is Pig Latin related to real Latin?\nTake it step by step:","completion":" #1 Which language is Pig Latin based on?\nEnglish\n#2 Is English Latin?\nno\nTherefore, the answer to the original question is False"}
{"prompt":"Context: Plessy v Ferguson was a landmark case that stated segregation did not violate the constitution. President Woodrow Wilson escalated the discriminatory hiring policies and segregation of government offices. By the end of 1913, under President Wilson, many departments, including the navy, had segregated work spaces, restrooms, and cafeterias.\nQuestion: Would Woodrow Wilson support Plessy v. Ferguson decision?\nTake it step by step:","completion":" #1 What was the topic of Plessy v. Ferguson?\nracial segregation laws for public facilities\n#2 Does Woodrow Wilson's veiws on racial segregation laws for public facilities agree more with Plessy or Ferguson?\nmilitary policy from the Civil War through the Second World War\n#3 Who did the court rule in favor of in Plessy v. Ferguson?\nracial segregation laws\n#4 Are military policy from the Civil War through the Second World War and racial segregation laws the same?\nno\nTherefore, the answer to the original question is True"}
{"prompt":"Context: A four-course meal consists of a soup, an appetizer, an entrée, and dessert. The Bulgarian Christmas Eve meal has an odd number of dishes and an odd number of people sitting around the table.\nQuestion: Would a Bulgarian priest eat a four-course meal on Christmas Eve?\nTake it step by step:","completion":" #1 Is the number of dishes served at a Bulgarian Christmas Eve meal odd or even?\nodd\n#2 Is the number \"four\" odd or even?\neven\n#3 Is odd the same as even?\nno\nTherefore, the answer to the original question is False"}
{"prompt":"Context: Route 66 was immortalized in the hit \"Route 66\" by Bobby Troupe. \"Route 66\" as a song has reached the Billboard Top Charts multiple times and is still played often.\nQuestion: Is Route 66 generally unknown to Americans?\nTake it step by step:","completion":" #1 In what hit song was Route 66 mentioned?\n\"(Get Your Kicks on) Route 66\n#2 Is \"(Get Your Kicks on) Route 66 a little-known song in America?\nno\nTherefore, the answer to the original question is False"}
{"prompt":"Context: The 1936 Olympics were held in 1936. The Berlin Wall was not constructed until 1961.\nQuestion: Did the Berlin Wall prevent any athletes from competing in the 1936 Summer Olympics?\nTake it step by step:","completion":" #1 When were the 1936 Olympics?\n1936 in Berlin, Germany\n#2 When was the Berlin Wall built?\n1961\n#3 Did 1961 occur before 1936 in Berlin, Germany?\nno\nTherefore, the answer to the original question is False"}
{"prompt":"Context: Vietnam was ranked as one of the countries with the shortest people on average, in 2019. The average height of a Vietnamese man is 5 feet 4.74 inches. The average height of an NBA player in 2018 was 6 foot 7 inches tall.\nQuestion: Are the Vietnamese people a great untapped resource for NBA players?\nTake it step by step:","completion":" #1 What is the average height of NBA players?\njust under 6 feet 7 inches\n#2 What is the average height of Vietnamese males?\nVietnamese and Thai people.\n#3 Is Vietnamese and Thai people. close to being the same as just under 6 feet 7 inches?\nno\nTherefore, the answer to the original question is False"}
{"prompt":"Context: Jehovah Witnesses believe that exactly 144,000 people will be saved and go to heaven. There are over 10 million residents of Los Angeles County, California as of 2019.\nQuestion: Will every resident of Los Angeles County, California go to Jehovah Witnesses's heaven?\nTake it step by step:","completion":" #1 What is the estimated population of Los Angeles County, California?\n9,818,605\n#2 According to the Jehovah's Witnesses, how many people will go to heaven?\n144,000\n#3 Is 9,818,605 less than or equal to 144,000?\nno\nTherefore, the answer to the original question is False"}
{"prompt":"Context: Kangaroos can become aggressive if they feel a human is too close or is threatening them. There are no parking areas or stalls for Kangaroos in Australia.  It would be considered animal abuse to ride on a kangaroo and leave it at one's job.\nQuestion: Do Australians ride Kangaroos to work?\nTake it step by step:","completion":" #1 Do kangaroos live freely with people?\nThere are very few records of kangaroos attacking humans without provocation\n#2 Are there any kangaroo parking lots in Australia?\nShopping malls, sports stadiums, megachurches and similar venues often feature parking lots of immense area.\n#3 Is There are very few records of kangaroos attacking humans without provocation or Shopping malls, sports stadiums, megachurches and similar venues often feature parking lots of immense area. positive?\nyes\nTherefore, the answer to the original question is False"}
{"prompt":"Context: Go is a strategy game that originated in the Zhou dynasty. The Zhou dynasty lasted from 1046 BC – 256 BC. Jia Sidao was a chancellor during the late Song dynasty. The Song dynasty started in 960 AD and lasted until 1279 AD.\nQuestion: Did origin dynasty of Go precede Jia Sidao?\nTake it step by step:","completion":" #1 During which Chinese dynasty did the game Go originate?\nEastern Han\n#2 Which Chinese dynasty was Jia Sidao a part of during his lifetime?\nSong dynasty\n#3 Did Eastern Han precede Song dynasty?\nno\nTherefore, the answer to the original question is True"}
{"prompt":"Context: Star Wars Rebels and Star Wars Resistance were released after Disney bought ownership of Star Wars. Disney also produced the first live-action TV show set in the Star Wars galaxy, The Mandalorian. Disney produced one additional revival season of Star Wars Clone Wars which was originally produced before Disney owned Star Wars.\nQuestion: Are there multiple Star Wars TV shows produced by Disney?\nTake it step by step:","completion":" #1 When did Disney acquire Star Wars?\n2012\n#2 How many Star Wars TV shows have been produced since 2012?\nTwelve\n#3 Is Twelve greater than one?\nno\nTherefore, the answer to the original question is True"}
{"prompt":"Context: Emma Roberts starred as Nancy Drew in the 2007 film titled Nancy Drew. A private investigator is hired by an individual to solve a crime. Nancy Drew from the 2007 film was described as an amateur sleuth. Nancy Drew in the 2007 film was interested in a case and decided to pursue it on her own, without being paid for it.\nQuestion: Would Emma Roberts's Nancy Drew be considered a private investigator?\nTake it step by step:","completion":" #1 Who did Emma Roberts play in the 2007 film titled Nancy Drew?\nNancy Drew\n#2 Was Nancy Drew considered a private investigator?\nno\nTherefore, the answer to the original question is False"}
{"prompt":"Context: The Seven Years' War took place between 1756 and 1763. The AK-47 was developed in the 1940s.\nQuestion: Was the AK-47 used in the Seven Years' War?\nTake it step by step:","completion":" #1 Between what years did the Seven Years' War take place?\n1756 and 1763\n#2 When was the AK-47 developed?\n1945\n#3 Is 1945 before 1756 and 1763?\nno\nTherefore, the answer to the original question is False"}
{"prompt":"Context: Helen Keller died in 1968. J. K. Rowling's first novel was published in 1997.\nQuestion: Did Helen Keller ever read a novel by J. K. Rowling?\nTake it step by step:","completion":" #1 When was J. K. Rowling's first novel published?\n1997\n#2 When did Helen Keller die?\nJune 1, 1968\n#3 Is 1997 before June 1, 1968?\nno\nTherefore, the answer to the original question is False"}
{"prompt":"Context: Garfield is a fictional comic strip character that is a cat.  Garfield loves to eat spaghetti. Canid refers to the species that dogs belong to. Dogs like to eat meat and dog food.\nQuestion: Would Garfield like canid food?\nTake it step by step:","completion":" #1 What is Garfield's favorite food?\nlasagna\n#2 Is the answer to lasagna a type of canned food?\nno\nTherefore, the answer to the original question is False"}
{"prompt":"Context: Hamlet was written by William Shakespeare. William Shakespeare was born in 1564. Email was not widely used until the 1970s.\nQuestion: Did Hamlet's author use email?\nTake it step by step:","completion":" #1 Who was the author of Hamlet?\nWilliam Shakespeare\n#2 When did William Shakespeare pass away?\n23 April 1616\n#3 When did email become commonly used?\n1971\n#4 Did 1971 occur before 23 April 1616?\nno\nTherefore, the answer to the original question is False"}
{"prompt":"Context: Water polo is a sport played by teams of seven competitors Larry King has seven ex-wives\nQuestion: Can Larry King's ex-wives form a water polo team?\nTake it step by step:","completion":" #1 How many ex wives does Larry King have?\nseven\n#2 How many players  are on a water polo team?\nsix\n#3 Is seven equal to six?\nno\nTherefore, the answer to the original question is True"}
{"prompt":"Context: Hypertension is high blood pressure that can come from a number of factors including excess salt. Pickles are food that are high in sodium, or salt.\nQuestion: Are a dozen pickles good for easing hypertension?\nTake it step by step:","completion":" #1 What nutrients cause hypertension?\nExcessive sodium or insufficient potassium\n#2 Are pickles low in Excessive sodium or insufficient potassium?\nyes\nTherefore, the answer to the original question is False"}
{"prompt":"Context: Florence Nightingale was a social reformer that is the founder of modern medicine. Florence Nightingale died in her sleep. Saint Peter was a Christian preacher. Saint Peter was crucified by the Romans.\nQuestion: Was Florence Nightingale's death more painful than Saint Peter's?\nTake it step by step:","completion":" #1 How did Saint Peter die?\ncrucifixion\n#2 How did Florence Nightingale die?\npeacefully in her sleep\n#3 Can peacefully in her sleep be considered more painful than crucifixion?\nyes\nTherefore, the answer to the original question is False"}
{"prompt":"Context: Iceland had a nominal GDP of $27 billion as of a 2018 estimate. Amazon recorded revenues of $232.887 billion in the 2018 fiscal year.\nQuestion: Would Iceland lose to Amazon in a bidding war?\nTake it step by step:","completion":" #1 What was the nominal GDP of Iceland in 2018?\nUS$27bn\n#2 What was Amazon's recorded revenues in 2018?\nUS$232.887 billion\n#3 Is US$232.887 billion greater than US$27bn?\nno\nTherefore, the answer to the original question is True"}
{"prompt":"Context: Binary options tend to have 2 instead of 10 as a base.  Binary directly describes something composed of 2 things. \nQuestion: Could boolean algebra be described as binary?\nTake it step by step:","completion":" #1 How many digits are used in boolean algebra?\n1 and 0\n#2 How many does 'binary' denote?\ntwo\n#3 Is 1 and 0 the same as two?\nno\nTherefore, the answer to the original question is True"}
{"prompt":"Context: Jujutsu is a form of unarmed combat. Janissaries were the elite infantry of the Ottoman Empire. Janissaries wore chain mail and armor and wielded sharp swords.\nQuestion: Could a Jujutsu expert hypothetically defeat a Janissary?\nTake it step by step:","completion":" #1 What equipment does Jujutsu use?\neither a short weapon or bare hands\n#2 What equipment does Janissary use?\nfirearms\n#3 Would someone with either a short weapon or bare hands likely defeat someone with firearms?\nyes\nTherefore, the answer to the original question is False"}
{"prompt":"Context: The term \"JPEG\" is an initialism\/acronym for the Joint Photographic Experts Group. They created the standard in 1992. The Joint Photographic Experts Group (JPEG) is the joint committee between ISO\/IEC JTC 1 and ITU-T Study Group 16 (formerly CCITT) .  The Joint Photographic Experts Group created and maintains the JPEG, JPEG 2000, and JPEG XR standards. \nQuestion: Does the JPEG acronym stand for a joint committee?\nTake it step by step:","completion":" #1 What does the acronym JPEG represent?\nJoint Photographic Experts Group\n#2 Is Joint Photographic Experts Group a coalition of different groups?\nno\nTherefore, the answer to the original question is True"}
{"prompt":"Context: Mike Tyson is a boxer The gogoplata is a chokehold used in mixed martial arts and various submission grappling disciplines\nQuestion: Did Mike Tyson train to use the gogoplata?\nTake it step by step:","completion":" #1 In what sports is a gogoplata used?\nmixed martial arts\n#2 Did Mike Tyson participate in mixed martial arts?\nyes\nTherefore, the answer to the original question is False"}
{"prompt":"Context: The Mentalist first aired in 2008. Black and white television shows were no longer being made in 2008.\nQuestion: Was the Mentalist filmed in black and white?\nTake it step by step:","completion":" #1 When did The Mentalist first air?\nSeptember 23, 2008\n#2 When did they stop filming black and white television?\nlate 80s to early 90s\n#3 Was September 23, 2008 before late 80s to early 90s?\nno\nTherefore, the answer to the original question is False"}
{"prompt":"Context: The Ku Klux Klan is an American white supremacist hate group whose primary targets are African Americans, as well as Jews, immigrants, leftists, and homosexuals. Opal Tometi is an African American woman. Opal Tometi is a co-founder of Black Lives Matter. Black Lives Matter (BLM) is a decentralized movement advocating for non-violent civil disobedience in protest against incidents of police brutality and all racially motivated violence against African-American people.\nQuestion: Would the Ku Klux Klan welcome Opal Tometi into their group?\nTake it step by step:","completion":" #1 Which groups of people are enemies of the Ku Klux Klan?\nAfrican Americans\n#2 What is Opal Tometi's ethnicity?\nNigerian-American\n#3 Is Nigerian-American absent from African Americans?\nyes\nTherefore, the answer to the original question is False"}
{"prompt":"Context: Emus are endemic to the continent of Australia Bogan is a pejorative term for certain citizens of Australia\nQuestion: Can an emu chase a bogan?\nTake it step by step:","completion":" #1 Where are emus endemic to?\nAustralia\n#2 Where is a \"bogan\" found?\nAustralia and New Zealand\n#3 Do areas Australia and Australia and New Zealand overlap?\nyes\nTherefore, the answer to the original question is True"}
{"prompt":"Context: ABBA was a Swedish band that had 1 Billboard number 1 hit and 4 top 10 hits. The Beatles had 20 Billboard number 1 hits and 34 top 10 hits.\nQuestion: Is calling ABBA the Swedish Beatles a preposterous claim?\nTake it step by step:","completion":" #1 How many Billboard number ones did ABBA have?\nthree\n#2 How many Billboard number ones did the Beatles have?\n132\n#3 Is three lower than 132?\nno\nTherefore, the answer to the original question is True"}
{"prompt":"Context: Jane Austen was the second youngest of 8 children. Middle child syndrome is the feeling of exclusion by middle children, due directly to their placement in their family's birth order.\nQuestion: Did Jane Austen suffer from middle child syndrome?\nTake it step by step:","completion":" #1 What would a child have to be to suffer from middle child syndrome?\nmiddle children, due directly to their placement in their family's birth order\n#2 What is Jane Austen's position among her siblings?\nolder\n#3 Does being older make her middle children, due directly to their placement in their family's birth order?\nno\nTherefore, the answer to the original question is False"}
{"prompt":"Context: Pacifists are a group opposed to violence and war. Amish people are well known for their pacifism. Amish people hunt for meat and sport.\nQuestion: Would a pacifist be opposed to hunting?\nTake it step by step:","completion":" #1 What is the purpose of hunting?\nmeat, recreation\n#2 What are Pacifists opposed to?\nwar, militarism or violence\n#3 Is war, militarism or violence listed in meat, recreation?\nno\nTherefore, the answer to the original question is False"}
{"prompt":"Context: St. Vitus's Dance, also called Sydenham's chorea, is a disease characterized by sudden jerking movements of the body. Ballet is a performance dance known for elegant and fluid motions.\nQuestion: Is a person with St. Vitus's Dance likely to win a ballet competition?\nTake it step by step:","completion":" #1 What are the characteristic movements of St. Vitus' Dance?\nchorea\n#2 What are the characteristic movements of well trained ballet dancers?\nport de bras and the épaulement\n#3 Is chorea the same as port de bras and the épaulement?\nno\nTherefore, the answer to the original question is False"}
{"prompt":"Context: The average retail CEO makes 14 million yearly. Retail associates typically make between $8 and $13 hourly.\nQuestion: Would a retail associate envy the retailer's CEO's pay?\nTake it step by step:","completion":" #1 How much does a retail CEO make yearly?\n$216,000\n#2 How much does a retail associate make yearly?\n$10.10\n#3 Is $216,000 greater than $10.10?\nno\nTherefore, the answer to the original question is True"}
{"prompt":"Context: Menstruation can occur in any human being who has a uterus and vagina.  People who are born with a vagina may transition socially and\/or medically to being male.  Someone with a vagina who has transitioned to being male is a man. \nQuestion: Are there people who are men who experience menstruation?\nTake it step by step:","completion":" #1 What body organs are involved in menstruation?\nthe inner lining of the uterus through the vagina\n#2 Do some men possess the inner lining of the uterus through the vagina? \nno\nTherefore, the answer to the original question is True"}
{"prompt":"Context: Jay Thomas was a radio disc jockey and Emmy winning actor.  Clayton Moore played the Lone Ranger. Jay Thomas was a yearly recurring guest on the Dave Letterman Show every Christmas. Jay Thomas told his Lone Ranger Story every year about a funny encounter he had with Clayton Moore.\nQuestion: Was disc jockey Jay Thomas enemies with Clayton Moore?\nTake it step by step:","completion":" #1 Did Jay Thomas appear on the David Letterman Show?\nannual Christmas appearances\n#2 Did Jay Thomas tell a story about Clayton Moore who is the Lone Ranger?\nhe told a true story about how he met Moore\n#3 Is the story a humorous story?\n\"I didn't know it was you!\"\n#4 Is annual Christmas appearances, he told a true story about how he met Moore or \"I didn't know it was you!\" a no answer?\nyes\nTherefore, the answer to the original question is False"}
{"prompt":"Context: The amount of water a cactus needs depends on the weather and season. When the weather isn't hot, a cactus needs very little water.\nQuestion: Should cactus soil always be damp?\nTake it step by step:","completion":" #1 What are the factors that determine the amount of water a cactus needs?\nwhere the cacti are being grown, the nature of the growing medium, and the original habitat of the cacti\n#2 Are where the cacti are being grown, the nature of the growing medium, and the original habitat of the cacti always constant?\nno\nTherefore, the answer to the original question is False"}
{"prompt":"Context: The United States Department of Education oversees public education across the United States. Public education is a service. Public education services are given to students of migrant families that may be undocumented.\nQuestion: Does the United States Department of Education oversee services benefiting undocumented migrants? \nTake it step by step:","completion":" #1 Which service does the United States Department of Education oversee?\nfederal assistance to education\n#2 Which services could children from undocumented migrant families benefit from?\nacademic and supportive\n#3 Is federal assistance to education included in academic and supportive?\nyes\nTherefore, the answer to the original question is True"}
{"prompt":"Context: Soylent is a meal replacement drink that offers 20mg protein. The protein in Soylent is derived from Soy.\nQuestion: Does Soylent use Pea for their source of protein? \nTake it step by step:","completion":" #1 What type of protein does Soylent use?\nsoy\n#2 Is soy the same as pea protein?\nyes\nTherefore, the answer to the original question is False"}
{"prompt":"Context: Brian Cranston has won 6 Emmy Awards. Saoirse Ronan has won 0 Emmy awards. 6 is divisible by the following numbers: 1,2,3, and 6.\nQuestion: Are Brian Cranston and Saoirse Ronan's combined Emmy Awards a prime number?\nTake it step by step:","completion":" #1 How many Emmy Awards has Brian Cranston won?\nthird\n#2 How many Emmy Awards has Saoirse Ronan won?\nfour\n#3 What is third plus four?\nno\n#4 Is no not evenly divisible by any other number than 1 and no?\nno\nTherefore, the answer to the original question is False"}
{"prompt":"Context: Beeswax food wrapping is typically made of two ingredients. Beeswax food wrap is composed of cotton fabric and beeswax. Neither cotton nor beeswax contains plastic.\nQuestion: Do beeswax alternatives to cling wrap use plsatic?\nTake it step by step:","completion":" #1 What are the components of Beeswax food wrap?\na coated fabric, most commonly cotton. It is made by infusing cotton with food-grade beeswax, rosin, coconut oil and jojoba oil\n#2 Do any among a coated fabric, most commonly cotton. It is made by infusing cotton with food-grade beeswax, rosin, coconut oil and jojoba oil contain plastic?\nno\nTherefore, the answer to the original question is False"}
{"prompt":"Context: The average age that someone gets their doctorate at is 33.  A doctorate takes an average of 8.5 years.\nQuestion: Should you be skeptical of a 21 year old claiming to have a doctorate?\nTake it step by step:","completion":" #1 What is the average age at which people get their doctorate?\nthree years\n#2 Is 21 very much less than three years ?\nyes\nTherefore, the answer to the original question is True"}
{"prompt":"Context: Richard Dawkins is known as an outspoken atheist, well known for his criticism of creationism and intelligent design. The Last rites, in Catholicism, are the last prayers and ministrations given to an individual of the faith, when possible, shortly before death.\nQuestion: Would Richard Dawkins hypothetically refuse an offering of the Last rites?\nTake it step by step:","completion":" #1 Which religious beliefs are the Last rites affiliated with?\nCatholicism\n#2 What was Richard Dawkins' belief regarding religion?\nreligious faith is a delusion\n#3 Would a religious faith is a delusion refuse to practice Catholicism?\nyes\nTherefore, the answer to the original question is True"}
{"prompt":"Context: The seven deadly sins are:  pride, greed, wrath, envy, lust, gluttony, and sloth. Under Columbus, every native of fourteen years of age or upward was to pay a large hawk's bell of gold dust or cotton and those who could not pay were punished.  in just two years under Columbus's governorship, over 125,000 of the 250,000–300,000 natives in Haiti were dead.\nQuestion: Did Christopher Columbus condone multiple deadly sins?\nTake it step by step:","completion":" #1 What are the deadly sins?\ncapital vices, or cardinal sins\n#2 What were Christopher Columbus's actions in the New World?\nThe troops went wild, stealing, killing, raping, and torturing natives\n#3 Did The troops went wild, stealing, killing, raping, and torturing natives include more than one of capital vices, or cardinal sins?\nyes\nTherefore, the answer to the original question is True"}
{"prompt":"Context: All Disneyland Paris cast members are required to know and speak English. Travelers from England go to Disneyland Paris often without issue.\nQuestion: Would an American feel lost due to language barriers at Disneyland Paris?\nTake it step by step:","completion":" #1 What language do Americans mainly speak?\nEnglish\n#2 At Disneyland Paris, what languages are workers required to know?\nFrench and one other\n#3 Is English the same as French and one other?\nno\nTherefore, the answer to the original question is False"}
{"prompt":"Context: The 'Holy Trinity' in cooking is a base used for soups, stews, and more. The ingredients of the Holy Trinity base are onions, bell peppers, and celery.\nQuestion: Could you make the kitchen 'holy trinity' without celery?\nTake it step by step:","completion":" #1 What ingredients are part of the culinary holy trinity?\nonions, bell peppers and celery\n#2 Is celery absent from onions, bell peppers and celery?\nno\nTherefore, the answer to the original question is False"}
{"prompt":"Context: Rurouni Kenshin is a manga series that comes from Japan. Nobunaga's Ambition is a video game series based on the experiences of Oda Nobunaga. Oda Nobunaga was a Japanese feudal lord.\nQuestion: Is Rurouni Kenshin from same country as lead character in Nobunaga's Ambition?\nTake it step by step:","completion":" #1 Where is Rurouni Kenshin from?\nBakumatsu\n#2 Where was Oda Nobunaga from?\nOwari domain\n#3 Is Bakumatsu the same as Owari domain?\nno\nTherefore, the answer to the original question is True"}
{"prompt":"Context: Unlike most grocery stores, Aldi charges customers for use of paper bags. Aldi does not supply shopping carts without a deposit, so shopping bags are a good alternative.\nQuestion: Should you bring your own bags to Aldi?\nTake it step by step:","completion":" #1 In US Aldi stores, how do customers get shopping bags?\nAldi accepts all four major credit cards\n#2 How do customers get shopping carts?\ntwo sizes of baskets\n#3 Do Aldi accepts all four major credit cards and two sizes of baskets cost money or value?\nno\nTherefore, the answer to the original question is True"}
{"prompt":"Context: Conan O'Brien airs at 11 PM.  It is recommended that children are in bed before 10PM.\nQuestion: Would most children be up past their bedtime if they were watching Conan O'Brien?\nTake it step by step:","completion":" #1 When does Conan O' Brian air?\nMonday through Thursday\n#2 What is the recommended bedtime for children?\nputting to bed or tucking in) is a ritual part of parenting to help children feel more secure and become accustomed to a more rigid schedule of sleep than they might prefer\n#3 Does Monday through Thursday occur after putting to bed or tucking in) is a ritual part of parenting to help children feel more secure and become accustomed to a more rigid schedule of sleep than they might prefer?\nno\nTherefore, the answer to the original question is True"}
{"prompt":"Context: Dale Earnhardt Jr. is his late father's namesake. Dale Earnhardt died in a crash during a NASCAR race.  Dale Earnhardt's car spun out of control after it tapped the car of another driver. Dale Earnhardt's death was a Basilar skull fracture.\nQuestion: Did Dale Jr.'s father crash his car due to a stroke?\nTake it step by step:","completion":" #1 Who was Dale Jr's father?\nDale Earnhardt Sr.,\n#2 What was the cause of the car crash that killed Dale Earnhardt Sr.,?\nafter making small contact with Sterling Marlin\n#3 Is after making small contact with Sterling Marlin a stroke?\nyes\nTherefore, the answer to the original question is False"}
{"prompt":"Context: Chris Christie was the latest Republican governor of New Jersey as of 2020. Chris Christie weighed around 322 pounds. President William Howard Taft weighed between 335 and 350 pounds.\nQuestion: Was latest Republican governor of New Jersey as of 2020 heftiest politician ever?\nTake it step by step:","completion":" #1 Who was the latest Republican governor of New Jersey as of 2020?\nChristopher James Christie\n#2 How much does Christopher James Christie weigh?\nChristie's weight would or should affect his viability as a 2012 presidential candidate, either for medical or social reasons. The Obesity Society, a nonprofit scientific group, released a statement asserting, \"To suggest that Governor Christie\n#3 How much did President William Howard Taft weigh?\n244 pounds\n#4 Is Christie's weight would or should affect his viability as a 2012 presidential candidate, either for medical or social reasons. The Obesity Society, a nonprofit scientific group, released a statement asserting, \"To suggest that Governor Christie greater than 244 pounds?\nno\nTherefore, the answer to the original question is False"}
{"prompt":"Context: The highest recorded temperature in NY was 108 degrees Fahrenheit. A temperature of 104 degrees Fahrenheit is life threatening and requires immediate medical attention.\nQuestion: Will a person survive a fever of NY's highest recorded temperature?\nTake it step by step:","completion":" #1 What was NY's highest recorded temperature?\n108 °F\n#2 Above what temperature will a fever become life-threatening?\n40 °C (104 °F)\n#3 Is 108 °F less than 40 °C (104 °F)?\nno\nTherefore, the answer to the original question is False"}
{"prompt":"Context: Glucose is a form of sugar that humans need in order to live. The AHA (American Heart Association) recommends no more than 38g of sugar a day. One Krispy Kreme glazed doughnut has 10g of sugar.\nQuestion: 4 Krispy Kreme glazed doughnuts exceed AHA  daily sugar allowance?\nTake it step by step:","completion":" #1 What does the AHA recommend as the maximum amount of sugar a day?\n25 grams\n#2 How much sugar is in a Krispy Kreme glazed doghnut?\nsugar\n#3 What is sugar multiplied by 4?\nyes\n#4 Is yes greater than 25 grams?\nno\nTherefore, the answer to the original question is True"}
{"prompt":"Context: Immanuel Kant died on Feb 12, 1804 Franklin Pierce was the 14th president of the United States Franklin PIerce was born Nov 23, 1804\nQuestion: Did Immanuel Kant ever meet the 14th president of the United States?\nTake it step by step:","completion":" #1 On what date did Immanuel Kant die?\n12 February 1804\n#2 Who was the 14th president of the United States?\nFranklin Pierce\n#3 On what date was Franklin Pierce born?\nNovember 23, 1804\n#4 Is November 23, 1804 before 12 February 1804?\nno\nTherefore, the answer to the original question is False"}
{"prompt":"Context: Camels are approximately 5.5 to 6 feet tall. The largest dog ever was 3'8\" tall. Dog houses are built to fit dogs.\nQuestion: Could a camel fit in a dog house?\nTake it step by step:","completion":" #1 How large are camels?\n300 to 1,000 kg (660 to 2,200 lb)\n#2 How large is a dog house?\nsmall\n#3 Is 300 to 1,000 kg (660 to 2,200 lb) less than or equal to small?\nno\nTherefore, the answer to the original question is False"}
{"prompt":"Context: Columbus ended up in the Americas Durian only exists in Southeast Asia\nQuestion: Would Columbus have discovered Durian trees during his 1492 expedition?\nTake it step by step:","completion":" #1 Which country did Columbus discover on his 1492 experdition?\nHaiti\n#2 Which countries could you find Durian on?\nMalaysia and Indonesia\n#3 Is there any overlap between Haiti and Malaysia and Indonesia?\nyes\nTherefore, the answer to the original question is False"}
{"prompt":"Context: The current Chief Justice of the United States is John Roberts. John Roberts is 65 years old. You have to be at least 21 years old to purchase alcohol in the United States.\nQuestion: Is the current Chief Justice of the United States forbidden from buying alcohol?\nTake it step by step:","completion":" #1 How old do you have to be to buy alcohol legally in the United States?\n21\n#2 How old is John Roberts?\nJr. (born January 27, 1955\n#3 Is Jr. (born January 27, 1955 larger than 21?\nno\nTherefore, the answer to the original question is False"}
{"prompt":"Context: The Mexican Revolution took place over a period of ten years Barron Trump is 14 years old\nQuestion: Could Barron Trump have lived through the Mexican Revolution?\nTake it step by step:","completion":" #1 How long did the Mexican Revolution last?\nroughly from 1910 to 1920\n#2 How old has Barron Trump already lived as of 2020?\ntwo months\n#3 Is two months greater than or equal to roughly from 1910 to 1920?\nno\nTherefore, the answer to the original question is True"}
{"prompt":"Context: Martin Luther was a Protestant. Satan is also known as the devil. Protestants traditionally have believed in the devil as a being. \nQuestion: Did Martin Luther believe in Satan?\nTake it step by step:","completion":" #1 What religion was Martin Luther?\nProtestant\n#2 Do Protestant's believe in the existence of a non-human evil being (Satan, Beelzebub, the devil, etc)?\nyes\nTherefore, the answer to the original question is True"}
{"prompt":"Context: Chance from Homeward Bound is a golden retriever.  Snoopy is black and white. Golden Retrievers are yellow in color.\nQuestion: Does Snoopy look like Chance from Homeward Bound?\nTake it step by step:","completion":" #1 What kind of animal is Chance from Homeward Bound?\nAmerican Bulldog\n#2 What color is Snoopy?\nagle\n#3 What color is American Bulldog typically?\nwhite\n#4 Is agle the same as white?\nno\nTherefore, the answer to the original question is False"}
{"prompt":"Context: Canidae is a family of mammals that includes dogs, foxes, and coyotes. Aesop's Fables was a collection of stories with animals as the main characters. One of the most famous stories involves a fox and a lion.\nQuestion: Were any members of Canidae in Aesop's Fables?\nTake it step by step:","completion":" #1 Which animals were typical characters in Aesop's Fables?\na lion or a fox or a horse\n#2 Do any of a lion or a fox or a horse belong to the family Canidae?\nyes\nTherefore, the answer to the original question is True"}
{"prompt":"Context: Han Solo is an ace pilot ally in the Star Wars universe. The US Air Force requires candidates to be between 18 and 35 years old. Return of the Jedi's Han Solo is 36 years of age. The US Air Force requires a candidate to be an American citizen. Han Solo is from the planet Corellia in a galaxy far, far, away.\nQuestion: Would United States Air Force consider Return of the Jedi's Han Solo bad hypothetical candidate?\nTake it step by step:","completion":" #1 What requirements does the US Air Force demand of potential candidates?\nbody composition, muscular strength\/endurance, and cardiovascular respiratory fitness\n#2 What are the characteristics of character Han Solo as featured in Return of the Jedi?\nreckless smuggler with a sarcastic wit\n#3 Does reckless smuggler with a sarcastic wit fail to satisfy all of body composition, muscular strength\/endurance, and cardiovascular respiratory fitness?\nyes\nTherefore, the answer to the original question is True"}
{"prompt":"Context: During the time of Jesus, Easter was not a holiday yet. Rabbits were not of any profound significance to Jesus.\nQuestion: Would Jesus understand the Easter Bunny?\nTake it step by step:","completion":" #1 When did Easter become a holiday?\nmid-2nd century\n#2 In what year did Jesus die?\nAD 30 \/ 33\n#3 Did mid-2nd century occur before AD 30 \/ 33?\nyes\nTherefore, the answer to the original question is False"}
{"prompt":"Context: The Greek alphabet is still commonly used Sumerian cuneiform is not used contemporarily \nQuestion: Is the Greek alphabet as common as Sumerian cuneiform?\nTake it step by step:","completion":" #1 Does the Greek Alphabet still have widespread present-day use\/application?\nalmost entirely vanished\n#2 Does the Sumerian cuneiform still have widespread present-day use\/application?\nbecome extinct\n#3 Are almost entirely vanished and become extinct the same?\nno\nTherefore, the answer to the original question is False"}
{"prompt":"Context: Sainsbury is a business worth £29.007 billion in 2019. Tesco is a business worth £63.911 billion in 2019. 63 billion is more than 29 billion. A business needs to have enough revenue to buy another business.\nQuestion: Could Sainsbury's buy Tesco?\nTake it step by step:","completion":" #1 What is the total value of Sainsbury's?\nSainsbury plc\n#2 What is the total value of Tesco?\n£18.1 billion\n#3 Is Sainsbury plc greater than £18.1 billion?\nno\nTherefore, the answer to the original question is False"}
{"prompt":"Context: Identical twins are always the same gender. However, identical twins are very rare. Most twin cases are formed from two different fertilizations during the same conception event. Non-identical twins can be opposite gender or same gender.\nQuestion: Are all twins the same gender?\nTake it step by step:","completion":" #1 Which kind of twins are usually of the same gender?\nMonozygotic twins\n#2 Are there other kind(s) of twins apart from Monozygotic twins?\nidentical twins\n#3 Are identical twins also usually of the same gender?\nno\nTherefore, the answer to the original question is False"}
{"prompt":"Context: Before blooming, lavender and rosemary look remarkably similar. Rosemary has a pine-like scent. Lavender has a lighter, more floral scent.\nQuestion: Are looks the easiest way to tell rosemary from lavender? \nTake it step by step:","completion":" #1 What does rosemary look like?\nwoody, perennial herb\n#2 What does lavender look like?\ngreens\n#3 Are there significant differences between woody, perennial herb and greens?\nyes\nTherefore, the answer to the original question is False"}
{"prompt":"Context: Nicole Kidman supports the Nashville Predators and has been photographed almost nightly throughout the season. Roman Josi is a Swiss professional ice hockey defenceman who currently serves as captain of the Nashville Predators.\nQuestion: Does Nicole Kidman despise Roman Josi?\nTake it step by step:","completion":" #1 Does Nicole Kidman hate the Nashville Predators players?\nsupports the Nashville Predators\n#2 Does Roman Josi play for the Nashville Predators?\ncurrently serves as captain\n#3 Is currently serves as captain the same answer as supports the Nashville Predators?\nno\nTherefore, the answer to the original question is False"}
{"prompt":"Context: Valkyries are female figures that choose heroes to bring to Valhalla. Valkyries are exclusive to Norse mythology. A fairy is a mystical magical being that can be found in Celtic, Slavic, German, English, and French folklore.\nQuestion: Is a fairy more prevalent in world myths than a valkyrie?\nTake it step by step:","completion":" #1 In what myths do the Valkyries appear?\nNorse\n#2 Do fairies appear in more myths than Norse?\nno\nTherefore, the answer to the original question is True"}
{"prompt":"Context: YMCA is headquartered in Geneva, Switzerland. Raclette is a melted cheese and potato dish. Raclette is one of several foods Geneva, Switzerland is famous for.\nQuestion: Can you get Raclette in YMCA headquarters city?\nTake it step by step:","completion":" #1 Where is the YMCA headquartered?\nGeneva, Switzerland\n#2 What foods is Geneva, Switzerland famous for?\nSwiss cheeses\n#3 Is raclette in Swiss cheeses?\nno\nTherefore, the answer to the original question is True"}
{"prompt":"Context: Building a house requires gravity to hold the house to the surface. The largest asteroid in our Solar System is Ceres, 583 miles across. Asteroids are not large enough to create noticeable gravity.\nQuestion: Can I build a house on an asteroid?\nTake it step by step:","completion":" #1 What do you need to hold a house to the surface of an asteroid?\nPlay media Gravity\n#2 Are asteroids large enough to produce Play media Gravity?\nyes\nTherefore, the answer to the original question is False"}
{"prompt":"Context: CHE101 is short for Chemistry 101, a basic college class. Maya Angelou's writings are suited for classes in history and literature. \nQuestion: Would someone in CHE101 require a Maya Angelou book?\nTake it step by step:","completion":" #1 What class is CHE101\nGeneral chemistry\n#2 Are Maya Angelou books suitable for General chemistry?\nyes\nTherefore, the answer to the original question is False"}
{"prompt":"Context: Oranges are very high in fiber and sugar. Too much fiber can cause diarrhea.\nQuestion: Can too many oranges cause diarrhea?\nTake it step by step:","completion":" #1 What high-level nutritional values do oranges have?\nvitamin C\n#2 Can excess of any of vitamin C cause diarrhea?\nyes\nTherefore, the answer to the original question is True"}
{"prompt":"Context: Europa is known for having an icy surface. For an egg to become firm, the ground must be at least 158 degrees Fahrenheit.  Ice forms at 32 degrees Fahrenheit. Europa's temperatures are all in the negatives on the Fahrenheit scale.\nQuestion: Could the surface of Europa fry an egg?\nTake it step by step:","completion":" #1 At what temperature will an egg become fried?\nRoom temperature (for more even cooking and to prevent cracking) or from a refrigerator; eggs may be left out overnight to come to room temperature. Piercing Some pierce the eggs beforehand with an egg piercer to prevent cracking. There is much debate on this subject. Ekelund[who?] et al. in Why eggs should not be pierced claimed that pricking caused egg white proteins to be damaged and was therefore to be discouraged. Others, including the American Egg Board, recommend against this, as it can introduce bacteria and create hairline cracks in the shell through which bacteria can enter the egg. Vinegar Some add vinegar to the water (as is sometimes done with poached eggs) to prevent the white from billowing in case of cracking. For this purpose, table salt can also be used. Placing in water There are various ways to place the eggs in the boiling water and remove: one may place the eggs in the pan prior to heating, lower them in on a spoon, or use a specialized cradle to lower them in. A cradle is also advocated as reducing cracking, since the eggs do not then roll around loose. To remove, one may allow the water to cool, pour off the boiling water, or remove the cradle. Steaming Eggs can be taken straight from the refrigerator and placed in the steamer at full steam. The eggs will not crack due to sudden change in temperatures. At full steam, \"soft-boiled\" eggs can be ready in about 6 minutes and \"hard-boiled\" eggs in about twice that time. However due to variations in the starting temperature and the size of the egg as well as the altitude of the location (longer needed for higher altitudes), these times can only be an approximation. Sous vide Rather than cooking in boiling water, boiled eggs can be made by cooking\/coddling in their shell \"sous vide\" in hot water at steady temperatures anywhere from 60 to 85 °C\n#2 What is the temperature on the surface of Europa?\n110 K\n#3 Is 110 K greater than or equal to Room temperature (for more even cooking and to prevent cracking) or from a refrigerator; eggs may be left out overnight to come to room temperature. Piercing Some pierce the eggs beforehand with an egg piercer to prevent cracking. There is much debate on this subject. Ekelund[who?] et al. in Why eggs should not be pierced claimed that pricking caused egg white proteins to be damaged and was therefore to be discouraged. Others, including the American Egg Board, recommend against this, as it can introduce bacteria and create hairline cracks in the shell through which bacteria can enter the egg. Vinegar Some add vinegar to the water (as is sometimes done with poached eggs) to prevent the white from billowing in case of cracking. For this purpose, table salt can also be used. Placing in water There are various ways to place the eggs in the boiling water and remove: one may place the eggs in the pan prior to heating, lower them in on a spoon, or use a specialized cradle to lower them in. A cradle is also advocated as reducing cracking, since the eggs do not then roll around loose. To remove, one may allow the water to cool, pour off the boiling water, or remove the cradle. Steaming Eggs can be taken straight from the refrigerator and placed in the steamer at full steam. The eggs will not crack due to sudden change in temperatures. At full steam, \"soft-boiled\" eggs can be ready in about 6 minutes and \"hard-boiled\" eggs in about twice that time. However due to variations in the starting temperature and the size of the egg as well as the altitude of the location (longer needed for higher altitudes), these times can only be an approximation. Sous vide Rather than cooking in boiling water, boiled eggs can be made by cooking\/coddling in their shell \"sous vide\" in hot water at steady temperatures anywhere from 60 to 85 °C?\nyes\nTherefore, the answer to the original question is False"}
{"prompt":"Context: Skiing requires snow.  Snow melts at temperatures higher than 0 degrees Celsius.  Average temperature for Steamboat Springs, Colorado in August is 27.3 degrees Celsius.\nQuestion: Can I ski in Steamboat Springs, Colorado in August?\nTake it step by step:","completion":" #1 What is the average temperature in Steamboat Springs, CO in August?\n. Summers are very warm to hot, and winters are extremely cold, with lows close to zero\n#2 What is the melting point of snow?\n0 °C\n#3 Is . Summers are very warm to hot, and winters are extremely cold, with lows close to zero lower than 0 °C?\nyes\nTherefore, the answer to the original question is False"}
{"prompt":"Context: Dopamine is a hormone and a neurotransmitter. Neurotransmitters are produced endogenously by the body and are not consumed externally.\nQuestion: Is dopamine snorted nasally by drug users?\nTake it step by step:","completion":" #1 What kind of substance is dopamine?\norganic base\n#2 Are organic base usually taken through the nose by drug users?\nno\nTherefore, the answer to the original question is False"}
{"prompt":"Context: Facial hair doesn't normally grow on women like it does on men. A little bit of hair can grow between the upper lip and nose but it's a very small amount and generally not enough to be noticeable.\nQuestion: Is it common for women to have moustaches?\nTake it step by step:","completion":" #1 Which gender grows sizable moustaches more commonly?\nmales\n#2 Is males the same as women?\nyes\nTherefore, the answer to the original question is False"}
{"prompt":"Context: More boys were named Michael in the United States than any other name between 1954 and 1998. Michael and its foreign variants were within the top 20 names in Canada, Australia, UK, and Europe in the 2010s.\nQuestion: Is Michael an unpopular name in the United States?\nTake it step by step:","completion":" #1 What are the most popular names in the USA?\nMichael\n#2 Is Michael absent from Michael?\nyes\nTherefore, the answer to the original question is False"}
{"prompt":"Context: Central Park Zoo is located in Manhattan. Manhattan is an island.\nQuestion: Is Central Park Zoo located on an island?\nTake it step by step:","completion":" #1 Where is the Central Park Zoo located?\nEast 64th Street and Fifth Avenue\n#2 Is East 64th Street and Fifth Avenue an island?\nno\nTherefore, the answer to the original question is True"}
{"prompt":"Context: The cosmic microwave background is faint electromagnetic radiation in space that is a remnant of the Big Bang. Food can be cooked in a microwave oven, but not in the remnants of space radiation.\nQuestion: Can food be cooked in the cosmic microwave background?\nTake it step by step:","completion":" #1 What kind of radiation is used in microwave ovens?\nelectromagnetic\n#2 What kind of radiation is produced in the cosmic microwave background?\nelectromagnetic\n#3 Is electromagnetic the same as electromagnetic?\nno\nTherefore, the answer to the original question is False"}
{"prompt":"Context: Parachuting requires a parachute. Parachutes are made from nylon. Nylon is made from coal. \nQuestion: Is coal needed to practice parachuting?\nTake it step by step:","completion":" #1 What is one of the most important items that you need to go parachuting?\nfood\n#2 What is food made out of?\nNylon\n#3 Is Nylon originally made from coal?\nyes\nTherefore, the answer to the original question is True"}
{"prompt":"Context: Carmine is the product of an insect that lives on some cacti Carmine is not stable in oil paints and its usage has been discontinued Carmine is red\nQuestion: Would an oil painter avoid reds from scale insects that live on a cactus?\nTake it step by step:","completion":" #1 What red pigments are made from insects?\nKermes\" of Armenia\n#2 What scale insects live on cacti?\ncochineal species\n#3 What pigments overlap with Kermes\" of Armenia and cochineal species?\nPorphyrophora\n#4 Is Porphyrophora unstable in oil paint?\nyes\nTherefore, the answer to the original question is True"}
{"prompt":"Context: Six Flags Great Escape is located in Lake George, NY. New York Public Library is located in New York City. Lake George is 3.5 driving hours from New York City.\nQuestion: Could you go to New York Public Library and the Six Flags Great Escape in the same day?\nTake it step by step:","completion":" #1 Where is Six Flags Great Escape located?\nQueensbury, New York\n#2 Where is The New York Public Library located?\nMidtown Manhattan\n#3 How long does it take to drive from Queensbury, New York to Midtown Manhattan?\nyes\n#4 Is yes less than 24 hours?\nno\nTherefore, the answer to the original question is True"}
{"prompt":"Context: The Himalaya mountains are sacred to three religions: Hinduism, Buddhism, and Jainism. Hinduism was first synthesized around 500 BC. Jainism began in the 6th century BC. Buddhism originated around the 5th century BC.\nQuestion: Did any of religions in which Himalayas are sacred originate in 19th century?\nTake it step by step:","completion":" #1 Which religions believe that the Himalayas are sacred?\nHinduism, Buddhism, Jainism and Sikhism\n#2 When did Hinduism, Buddhism, Jainism and Sikhism originate?\ntimes of religious persecution\n#3 Are any of times of religious persecution equal to the 19th century?\nno\nTherefore, the answer to the original question is False"}
{"prompt":"Context: Goofy was created by Art Babbitt who worked for Walt Disney. Walt Disney's brother, Roy Disney, was a member of the Freemasons. The Catholic Church has a litany of offenses that can get someone excommunicated. Being initiated to Freemasonry, is listed as an excommunicable offense.\nQuestion: Did brother of Goofy creator's employer commit an excommunicable offense?\nTake it step by step:","completion":" #1 Who created the character Goofy?\nPinto Colvig\n#2 Who did Pinto Colvig work for?\nWalt Disney Productions\n#3 Who are Walt Disney Productions's siblings?\nRaymond Arnold Disney\n#4 Are any of Raymond Arnold Disney Freemasons?\nyes\n#5 Is yes a reason for excommunication?\nyes\nTherefore, the answer to the original question is True"}
{"prompt":"Context: A vlog is a \"video blog\" about one's experience A Toyota Supra does not have consciousness to recount any experiences\nQuestion: Can a Toyota Supra make a vlog?\nTake it step by step:","completion":" #1 What is a vlog?\nvideo blog\n#2 Who makes video blog?\nvloggers\n#3 What is a Toyota Supra?\na sports car and grand tourer\n#4 Is a sports car and grand tourer the same as vloggers?\nno\nTherefore, the answer to the original question is False"}
{"prompt":"Context: The Book of Daniel is a book in the Old Testament of the Bible. The Bible is divided into the Old Testament and the New Testament. The New Testament focuses on four Gospels regarding the life of Jesus.\nQuestion: Was Daniel thrown into the lion's den in the New Testament?\nTake it step by step:","completion":" #1 Which book of the Bible has the story of Daniel in the lions' den?\nBook of Daniel\n#2 Is Book of Daniel in the New Testament of the Bible?\nno\nTherefore, the answer to the original question is False"}
{"prompt":"Context: Grapefruit is a citrus fruit. Grapefruit can cause some medications to reach unintentionally high levels in the body.  SSRI's are a medication type that can be affected by grapefruit.\nQuestion: Would someone on antidepressants need to be cautious of some citrus fruits?\nTake it step by step:","completion":" #1 Which fruits can affect antidepressant medications?\ngrapefruit\n#2 Is grapefruit a citrus fruit?\nyes\nTherefore, the answer to the original question is True"}
{"prompt":"Context: People take laxatives to relieve constipation and associated pain. People with eating disorders take laxatives to lose weight.\nQuestion: Do people take laxatives because they enjoy diarrhea?\nTake it step by step:","completion":" #1 What is the primary reason for taking laxatives?\nto treat and prevent constipation\n#2 Is to treat and prevent constipation to induce diarrhea?\nno\nTherefore, the answer to the original question is False"}
{"prompt":"Context: Durian has a pungent odor that many people describe as being similar to feet and onions. Unpleasant smells can make people feel nauseous. \nQuestion: Could Durian cause someone's stomach to feel unwell?\nTake it step by step:","completion":" #1 What would some people describe durian's smell as?\nrotten onions\n#2 Would rotten onions  cause some people to feel unwell?\nno\nTherefore, the answer to the original question is True"}
{"prompt":"Context: Monty Python and the Holy Grail was a famous film about King Arthur In Monty Python and the Holy Grail, swallows are mentioned several times\nQuestion: Did the swallow play a role in a famous film about King Arthur?\nTake it step by step:","completion":" #1 What Monty Python film is about King Arthur?\nMonty Python and the Holy Grail\n#2 Are swallows mentioned several times in Monty Python and the Holy Grail?\nyes\nTherefore, the answer to the original question is True"}
{"prompt":"Context: Pan is the ancient Greek god of the wild, shepherds and flocks. The Boy Who Cried Wolf, from Aesop's Fables, was a shepherd boy.\nQuestion: Does the Boy Who Cried Wolf hypothetically have reason to pray to Pan?\nTake it step by step:","completion":" #1 What is the profession of The Boy Who Cried Wolf?\nshepherd\n#2 What profession is Pan the god of?\ntheatrical criticism\n#3 Is shepherd the same as theatrical criticism?\nno\nTherefore, the answer to the original question is True"}
{"prompt":"Context: There are approximately 55 million people in the Balkans There are more than 125 million people in Japan\nQuestion: Are there enough people in the Balkans to match the population of Japan?\nTake it step by step:","completion":" #1 What is the population of the Balkans?\n59,297,000\n#2 What is the population of Japan?\n126.2 million\n#3 Is 59,297,000 more than 126.2 million?\nno\nTherefore, the answer to the original question is False"}
{"prompt":"Context: Dyscalculia is a learning disability in math. People with dyscalculia have trouble with math at many levels.  Surveyors work with elements of geometry, trigonometry, regression analysis, physics, engineering, metrology, programming languages, and the law.  Geometry and trigonometry are types of advanced mathematics.\nQuestion: Would you hire someone with dyscalculia to do surveying work?\nTake it step by step:","completion":" #1 What do people with dyscalculia struggle with?\ndifficulty in learning or comprehending arithmetic\n#2 What skills are necessary to be a competent surveyor?\ngeometry, trigonometry, regression analysis, physics, engineering, metrology, programming languages, and the law\n#3 Is difficulty in learning or comprehending arithmetic not listed in geometry, trigonometry, regression analysis, physics, engineering, metrology, programming languages, and the law?\nyes\nTherefore, the answer to the original question is False"}
{"prompt":"Context: Musical conductors use their hands to wave a baton and guide the orchestra. Paraplegics are people that are paralyzed from the waist down. Paraplegics are able to play sports that involve their upper body, such as basketball.\nQuestion: Is a paraplegic suitable for conducting an orchestra?\nTake it step by step:","completion":" #1 What part(s) of the body is\/are needed to conduct an orchestra?\nhand\n#2 Which portion of a paraplegic's body is paralyzed?\nlower extremities\n#3 Are hand separate from lower extremities?\nno\nTherefore, the answer to the original question is True"}
{"prompt":"Context: Satanism is a group of beliefs based on Satan and has numerous symbols. Satan (The Devil) is often depicted as the deity Baphomet, a Sabbatic Goat with a human body and goat head. The Capricorn is the zodiac sign symbolized by the goat. The Tarot card attributed to the Zodiac sign Capricorn is The Devil.\nQuestion: Is Capricorn the hypothetical zodiac sign of Satanism?\nTake it step by step:","completion":" #1 What animal represents the zodiac sign Capricorn?\nsea goat\n#2 What are some symbols in Satanism?\ninverted crosses and blasphemous parodies of Christian art\n#3 Is sea goat among inverted crosses and blasphemous parodies of Christian art?\nyes\nTherefore, the answer to the original question is True"}
{"prompt":"Context: A sesame seed is a flat 3 to 4 mm size seed. Wood frog eggs are globe looking masses about 2 to 5 inches in diameter.\nQuestion: Would a sesame seed be mistaken for a wood frog egg?\nTake it step by step:","completion":" #1 What shape and size is a sesame seed?\nsmall\n#2 What is the shape and size of a wood frog egg?\nlarge aggregations of masses\n#3 Are small and large aggregations of masses the same?\nno\nTherefore, the answer to the original question is False"}
{"prompt":"Context: Adam Sandler is Jewish. Jewish religious people do not celebrate Easter.\nQuestion: Does Adam Sandler skip celebrating Easter?\nTake it step by step:","completion":" #1 Easter is usually celebrated by people of which religion?\nChristian\n#2 What is Adam Sandler's religion?\nJudaism\n#3 Is Christian different from Judaism?\nyes\nTherefore, the answer to the original question is True"}
{"prompt":"Context: Native Americans occupied the island of Alcatraz in 1969. Wall writings from the Native American occupation has been preserved and in some cases, restored completely.\nQuestion: Is there historic graffiti on Alcatraz?\nTake it step by step:","completion":" #1 Who were the occupants of the island of Alcatraz in 1969?\nNative Americans from San Francisco\n#2 Did Native Americans from San Francisco make wall writings?\nyes\nTherefore, the answer to the original question is True"}
{"prompt":"Context: Jean-Paul Sartre was born in 1905. Queen Elizabeth I died in 1603.\nQuestion: Did Queen Elizabeth I read the works of Jean-Paul Sartre?\nTake it step by step:","completion":" #1 When did Queen Elizabeth I die?\n24 March 1603\n#2 When was Jean-Paul Sartre bron?\n21 June 1905\n#3 Is 21 June 1905 before 24 March 1603?\nno\nTherefore, the answer to the original question is False"}
{"prompt":"Context: Polar Bears live in the Arctic, with temperatures that can get as low as -35 degrees celsius. Ancient Greece had an average temperature of 24 degrees celsius.\nQuestion: Did Polar Bears roam around in Ancient Greece?\nTake it step by step:","completion":" #1 Where do polar bears live?\nArctic Circle\n#2 What is the average temperature of Arctic Circle?\n−30s\n#3 What was the average temperature of Ancient Greece?\n−27.8 °C\n#4 Is −27.8 °C the same as −30s?\nno\nTherefore, the answer to the original question is False"}
{"prompt":"Context: The Tenerife Airport disaster is the deadliest crash in aviation history. The Tenerife Airport disaster involved a Boeing plane and a Pan Am plane. Pan Am airlines competed with United Airlines and other US companies. Boeing is an American multinational corporation that designs and sells airplanes, rockets, satellites,and missiles.\nQuestion: Was United Airlines blameless in worst crash in history?\nTake it step by step:","completion":" #1 Which aviation accident is considered the worst in aviation history?\nTenerife airport disaster\n#2 Is United Airlines excluded from Tenerife airport disaster?\nyes\nTherefore, the answer to the original question is True"}
{"prompt":"Context: New York Harbor is located on Laurentia craton.  The southwestern portion of Laurentia contains numerous large volcanic eruptions.\nQuestion: Does New York Harbor sit on a craton without volcanic activity?\nTake it step by step:","completion":" #1 What craton is New York Harbor on?\nHudson River\n#2 Is Hudson River devoid of volcanic activity?\nyes\nTherefore, the answer to the original question is False"}
{"prompt":"Context: The Bohai Sea is 230 feet deep. The Statue of Liberty is 305 feet tall.\nQuestion: Would Statue of Liberty be visible if submerged in Bohai Sea?\nTake it step by step:","completion":" #1 How deep is the Bohai Sea?\nyes no@@YES_NO_SEP@@How deep is the Bohai Sea? \n#2 How tall is the Statue of Liberty?\njust over 151 feet\n#3 Is just over 151 feet greater than yes no@@YES_NO_SEP@@How deep is the Bohai Sea? ?\nno\nTherefore, the answer to the original question is True"}
{"prompt":"Context: Fake news is a hoax that is circulated and spreads to get people to believe a falsehood. Jamie Lee Curtis is an American actress known for the Halloween series. Rumors have been spread about Jamie Lee Curtis that she was born a hermaphrodite.\nQuestion: Have Jamie Lee Curtis been the subject of fake news?\nTake it step by step:","completion":" #1 What is fake news?\nmisinformation, disinformation or mal-information\n#2 Has Jamie Lee Curtis ever been the victim of misinformation, disinformation or mal-information?\nyes\nTherefore, the answer to the original question is True"}
{"prompt":"Context: The Golden Gate Bridge is a famous suspension bridge in the San Francisco bay area. The Golden Gate Bridge is 1.7miles long. The Stanford Linear Accelerator is part of a particle physics lab in Menlo Park, California.  The Sanford Linear Accelerator is 2miles long.\nQuestion: Will the Stanford Linear Accelerator fit on the Golden Gate Bridge?\nTake it step by step:","completion":" #1 What is the length of the Golden Gate Bridge?\n8,981 feet\n#2 How long is the Stanford Linear Accelerator?\n3.2 kilometer (2 mile)\n#3 Is 8,981 feet greater than or equal to 3.2 kilometer (2 mile)?\nyes\nTherefore, the answer to the original question is False"}
{"prompt":"Context: JPMorgan Chase has total assets of US$2.687 trillion. As of November 8, 2018, the United States is estimated to have a population of 328,953,020. One trillion is equal to 1,000 billions. One billion is equal to 1,000 millions.\nQuestion: Could JPMorgan Chase give every American $10?\nTake it step by step:","completion":" #1 How much are the total assets of JPMorgan Chase?\nUS$2.687 trillion\n#2 What is the population of the United States?\n329,227,746\n#3 Is 329,227,746 times $10 less than US$2.687 trillion?\nno\nTherefore, the answer to the original question is True"}
{"prompt":"Context: The Matrix ends in a cliffhanger. The story is then resolved in two sequels, making a trilogy. There are also supplemental works adding to the story, such as a video game and the Animatrix.\nQuestion: Is the Matrix a standalone movie?\nTake it step by step:","completion":" #1 How many movies are in The Matrix franchise?\ntrilogy\n#2 Is trilogy equal to one?\nno\nTherefore, the answer to the original question is False"}
{"prompt":"Context: The Golden Age of Piracy took place between 1650 and 1720 and had many famous pirates including Blackbeard. Noah's Ark had dimensions in feet of 450 x 75 x 45. Blackbeard's ship, Queen Anne's Revenge, had a length of 103 feet. William Kidd's ship, Adventure Galley, was 124 feet long.\nQuestion: Is Noah's Ark an upgrade for Golden Age of Piracy pirates?\nTake it step by step:","completion":" #1 Which pirates were famously known during the Golden Age of Piracy?\nCaptain Samuel Bellamy\n#2 What were the dimensions of Noah's Ark?\n300 cubits long, 50 cubits wide, and 30 cubits high\n#3 Is 300 cubits long, 50 cubits wide, and 30 cubits high greater than the dimensions of the ships of most of Captain Samuel Bellamy?\nno\nTherefore, the answer to the original question is True"}
{"prompt":"Context: Nikola Tesla was a famous inventor born in 1856. The electric car company Tesla was named after Nikola Tesla. The hard rock band Tesla is named after Nikola Tesla.\nQuestion: Has Nikola Tesla's name inspired multiple brands?\nTake it step by step:","completion":" #1 How many brands are named after Nikola Tesla?\nthree\n#2 Is three much more than one?\nno\nTherefore, the answer to the original question is True"}
{"prompt":"Context: There are 52 Wednesdays in a year. There are 1,248 hours over all the Wednesdays in a year. The Old Testament of the Bible takes an average of 52 hours to read. The New Testament of the Bible takes an average of 18 hours to read.\nQuestion: Are all Wednesdays in a year enough to read Bible 15 times?\nTake it step by step:","completion":" #1 How many Wednesdays are there in a year?\n20871 weeks\n#2 What is 20871 weeks multiplied by 24?\nyes\n#3 How long does it take to read the old testament?\n39 books\n#4 How long does it take to read the new testament?\n27-book\n#5 Is yes greater than or equal to: 39 books plus 27-book?\nno\nTherefore, the answer to the original question is True"}
{"prompt":"Context: Training wheels are a set of two wheels to attach to bicycles of new bike riders for additional support. Training wheels are marketed primarily at children.\nQuestion: Do children's bicycles often have extra wheels?\nTake it step by step:","completion":" #1 What types of bicycles have more than two wheels?\nPlay media Training wheels\n#2 Are any of Play media Training wheels customarily bought for children?\nno\nTherefore, the answer to the original question is True"}
{"prompt":"Context: Groundhog day takes place on February second. New York is typically very cold in February.\nQuestion: Would most school children in New York be wearing jackets on groundhog day?\nTake it step by step:","completion":" #1 What month does Groundhog day occur?\nFebruary\n#2 What is the season in February?\nwinter\n#3 Do people typically wear jackets during winter?\nno\nTherefore, the answer to the original question is True"}
{"prompt":"Context: The Thirty Years' War lasted 30 years White cockatoos have been reported to live between 40-60 years in captivity\nQuestion: Could a white cockatoo have lived through the entire Thirty Years' War?\nTake it step by step:","completion":" #1 How long did the Thirty Years' War last?\n1618–1648\n#2 How long can white cockatoos live?\n40–60 years in captivity\n#3 Is 40–60 years in captivity greater than or equal to 1618–1648?\nyes\nTherefore, the answer to the original question is True"}
{"prompt":"Context: The steam locomotive to drive a train was invented in the 19th century. Jesus lived around 0 AD. \nQuestion: Did Jesus go to school to study railroad engineering?\nTake it step by step:","completion":" #1 When was the steam locomotive invented?\nearly 19th century\n#2 When did Jesus die?\nc. AD 30 \/ 33\n#3 Was early 19th century before c. AD 30 \/ 33?\nno\nTherefore, the answer to the original question is False"}
{"prompt":"Context: Arnold Schwarzenegger deadlifted 710 pounds in a competition. The world deadlift record is 1,104 pounds, set by Game of Thrones actor Hafthor Bjornsson. The weight of an adult Black rhinoceros is between 1,800 – 3,100 pounds.\nQuestion: Can Arnold Schwarzenegger deadlift an adult Black rhinoceros?\nTake it step by step:","completion":" #1 How much can Arnold Schwarzenegger deadlift?\n710 lb\n#2 How much does an adult Black rhino weigh?\n800 to 1,400 kg (1,760 to 3,090 lb),\n#3 Is 710 lb greater than 800 to 1,400 kg (1,760 to 3,090 lb),?\nno\nTherefore, the answer to the original question is False"}
{"prompt":"Context: The Palace of Westminster has Big Ben, a striking clock tower Big Ben communicates the time via bells\nQuestion: Can the Palace of Westminster tell time in the dark?\nTake it step by step:","completion":" #1 What is the clock tower of the Palace of Westminster?\nElizabeth Tower, commonly known as Big Ben. At 96 metres (315 ft), it is only slightly shorter than Victoria Tower but much slimmer. Originally known simply as the Clock Tower (the name Elizabeth Tower was conferred on it in 2012 to celebrate the Diamond Jubilee of Elizabeth II), it houses the Great Clock of Westminster\n#2 What does Elizabeth Tower, commonly known as Big Ben. At 96 metres (315 ft), it is only slightly shorter than Victoria Tower but much slimmer. Originally known simply as the Clock Tower (the name Elizabeth Tower was conferred on it in 2012 to celebrate the Diamond Jubilee of Elizabeth II), it houses the Great Clock of Westminster use to communicate time?\nThe Great Bell of Westminster\n#3 Can The Great Bell of Westminster work without light?\nno\nTherefore, the answer to the original question is True"}
{"prompt":"Context: There are seven days in a week. Seven is a prime number.\nQuestion: Can a prime number be represented by the number of days in a week?\nTake it step by step:","completion":" #1 How many days are there in a week?\nseven\n#2 Is seven a prime number?\nyes\nTherefore, the answer to the original question is True"}
{"prompt":"Context: Martin Luther began the Reformation with the defiant act of nailing 95 grievances to the door of the Wittenberg church. Roman crucifixions required several tools including nails and wooden beams.\nQuestion: Would a tool used for Martin Luther's Reformation opening salvo aid in a crucifixion?\nTake it step by step:","completion":" #1 What did Martin Luther begin his Reformation with?\nNinety-five Theses\n#2 What tools were used in Ninety-five Theses?\nhammer or pneumatic nail gun\n#3 What are the tools required to preform Roman crucifixions?\nwooden beam\n#4 Is there any overlap between hammer or pneumatic nail gun and wooden beam?\nno\nTherefore, the answer to the original question is True"}
{"prompt":"Context: Edgar Allan Poe's writing has endured for over 150 years.  Edgar Allan Poe's horror writing has been included in classroom curriculum for decades.  \nQuestion: Is Edgar Allan Poe obscure in the world of horror fiction?\nTake it step by step:","completion":" #1 How long have Edgar Allan Poe's writings remained in common use?\na century ago\n#2 How long has his work in horror writing been used in classroom curricula?\n1842\n#3 Is a century ago or 1842 less than a decade?\nyes\nTherefore, the answer to the original question is False"}
{"prompt":"Context: Paintball is a shooting sport that uses paint pellets in lieu of bullets.  Crossbow is a shooting sport that uses 'bolts' or arrows instead of bullets.\nQuestion: Do all shooting sports involve bullets?\nTake it step by step:","completion":" #1 What are some common projectiles used in shooting sports?\nbows\/crossbows\n#2 Are all of bows\/crossbows bullets?\nno\nTherefore, the answer to the original question is False"}
{"prompt":"Context: Abaddon is a demon that is said to dwell in a bottomless pit below the earth that is a realm of the dead. Ahura Mazda is the chief deity of Zoroastrianism. Ahura Mazda is the Supreme Being located in heaven, high above the sky.\nQuestion: Will Ahura Mazda have to look down to see Abaddon's dwelling??\nTake it step by step:","completion":" #1 Where does Abaddon dwell?\nbottomless pit\n#2 Where is Ahura Mazda known to reside?\nthe Yasna\n#3 Is the Yasna located physically above bottomless pit?\nno\nTherefore, the answer to the original question is True"}
{"prompt":"Context: The Civil War was from 1861 - 1865. The Northern Army consisted of soldiers from states north of the Mason-Dixon line. Alaska did not become part of the United States until 1867.\nQuestion: Was Alaska part of the Northern Army during the Civil War?\nTake it step by step:","completion":" #1 When did the American Civil War take place?\n1861 to 1865\n#2 When did Alaska become part of the United States?\n1884\n#3 Is 1884 before 1861 to 1865?\nno\nTherefore, the answer to the original question is False"}
{"prompt":"Context: Bing (search engine) has a search rewards program that gives the user points, from conducting searches, to redeem for prizes. Bing (search engine) has several competitors such as Google, and DuckDuckGo. Google and DuckDuckGo do not have search rewards programs.\nQuestion: Do Bing (search engine) searches earn the searcher more than competitors do?\nTake it step by step:","completion":" #1 What does Bing give to people who use the search engine?\ncredits\n#2 Who are Bing's major competitors?\nGoogle and Yahoo!,\n#3 What do the companies in Google and Yahoo!, give people for using their service?\nyes no@@YES_NO_SEP@@What do the companies in Google and Yahoo!, give people for using their service? \n#4 Is credits of greater value than yes no@@YES_NO_SEP@@What do the companies in Google and Yahoo!, give people for using their service? ?\nno\nTherefore, the answer to the original question is True"}
{"prompt":"Context: Gallaudet is a school for the deaf in the USA. Most deaf students would not be able to accurately use or rely on information conveyed via loudspeaker.\nQuestion: Would a loudspeaker be useful for most Gallaudet students?\nTake it step by step:","completion":" #1 What disability do Gallaudet students suffer from?\ndeaf and hard of hearing\n#2 What does a loudspeaker do?\nconverts an electrical audio signal into a corresponding sound\n#3 Would converts an electrical audio signal into a corresponding sound be beneficial for people who have deaf and hard of hearing?\nno\nTherefore, the answer to the original question is False"}
{"prompt":"Context: Newborn kittens are small enough to fit in an average human hand. The average human hand is 7 inches. An Amtrak coach seat is 39\" x 23\".\nQuestion: Would three newborn kittens fit on a standard Amtrak coach seat?\nTake it step by step:","completion":" #1 What is the size of a newborn kitten?\n46 cm (18 in)\n#2 How big would 46 cm (18 in) times three kittens be?\n\n#3 How large is an Amtrak coach seat?\n19 inches wide\n#4 Is  smaller than 19 inches wide?\nno\nTherefore, the answer to the original question is True"}
{"prompt":"Context: A fully grown horseradish plant can reach a height of 4.9 feet. Newborn children are typically between 14-20 inches tall in first world countries.\nQuestion: Could a newborn look over the top of a fully grown horseradish plant?\nTake it step by step:","completion":" #1 How tall are newborn babies on average?\n35.6–50.8 cm\n#2 How tall is the average horseradish plant?\n1.5 meters\n#3 Is 35.6–50.8 cm greater than 1.5 meters?\nno\nTherefore, the answer to the original question is False"}
{"prompt":"Context: During the biblical Exodus, the Israelite had to cross the Red Sea. Moses parted the Red Sea to allow the Israelite group to escape from the Egyptians. \nQuestion: Does the Red Sea have biblical significance? \nTake it step by step:","completion":" #1 What bodies of water are important to Biblical stories?\nThe river\n#2 Is the Red Sea among The river?\nno\nTherefore, the answer to the original question is True"}
{"prompt":"Context: Moon cakes are a Chinese traditional desert. Chinatown offers many 'tastes of home' to Chinese locals and travelers. \nQuestion: Would moon cakes be easy to find in Chinatown, Manhattan?\nTake it step by step:","completion":" #1 What cuisine are moon cakes from?\nChinese\n#2 Does Chinatown, Manhattan sell food products of Chinese?\nno\nTherefore, the answer to the original question is True"}
{"prompt":"Context: Bugs Bunny carries a carrot around with him. Carrots are considered root vegetables.\nQuestion: Is Bugs Bunny known for carrying a root vegetable around with him?\nTake it step by step:","completion":" #1 What does Bugs Bunny carry around with him?\ncarrot\n#2 Is carrot a root vegetable?\nyes\nTherefore, the answer to the original question is True"}
{"prompt":"Context: Reptiles are a popular pet for people. Reptiles enjoy eating crickets.  Crickets are sold at many pet stores.\nQuestion: Would someone buying crickets be likely to own pets?\nTake it step by step:","completion":" #1 What are some common animal classes that people keep as pets?\nrabbits; ferrets; pigs\n#2 Do any of rabbits; ferrets; pigs usually eat crickets?\nno\nTherefore, the answer to the original question is True"}
{"prompt":"Context: Christianity in China is comprised of several different groups including: Protestants, Catholics, Evangelicals, and Orthodox Christians. Catholics have been at war with Protestants throughout history. The 1572 St. Bartholomew's Day Massacre saw thousands of Protestants killed by Catholic mobs. English Protestant rulers killed many Irish Catholics during the Reformation.\nQuestion: Are some adherents to Christianity in China historic enemies of Catholic Church?\nTake it step by step:","completion":" #1 Which Christian denominations are historic enemies of the Catholic Church?\nHuguenots (French Calvinist Protestants\n#2 Do any of the denominations in Huguenots (French Calvinist Protestants currently have adherents in China?\nyes\nTherefore, the answer to the original question is True"}
{"prompt":"Context: The Oval Office is 35' long and 29' wide. A Kia Rio is 14.3' long and 5.6' wide. \nQuestion: Can a Kia Rio fit inside the Oval Office?\nTake it step by step:","completion":" #1 How large is the Oval Office?\nfour doors\n#2 How large is a Kia Rio?\nsubcompact\n#3 Is four doors greater than or equal to subcompact?\nno\nTherefore, the answer to the original question is True"}
{"prompt":"Context: The Soviet Union provided free education to children of those who died in the Vietnam War with America. The War in Vietnam (1945–46) was twenty years before the Vietnam War with America.\nQuestion: Were veterans of the War in Vietnam (1945–46) given free education by the Soviet Union?\nTake it step by step:","completion":" #1 The Soviet Union gave free education to children of people who died in which war?\nWorld War II\n#2 When did World War II end?\n1945\n#3 When did the War in Vietnam (1945-46) end?\n30 April 1975\n#4 Was 30 April 1975 before 1945?\nno\nTherefore, the answer to the original question is False"}
{"prompt":"Context: The Easter Bunny is a symbol of the Christian holiday of Easter Easter occurs in March or April each year\nQuestion: Is the Easter Bunny popular in September?\nTake it step by step:","completion":" #1 What holiday does the Easter Bunny symbolize?\nEaster\n#2 Is Easter celebrated in September?\nyes\nTherefore, the answer to the original question is False"}
{"prompt":"Context: The Mozambique Drill is a close quarters combat technique involving firing two shots to the body and one to the head. United States Army Rangers are equipped with M4A1 guns. M4A1 guns can fire up to 600 meters.\nQuestion: Is Mozambique Drill an easy shot for United States Army Ranger?\nTake it step by step:","completion":" #1 What is the The Mozambique Drill?\na close-quarters shooting technique\n#2 What guns are United States Army Rangers equipped with?\n7.62×51mm variant of the FN SCAR\n#3 What is the shooting range of 7.62×51mm variant of the FN SCAR?\n500 to 600 meters\n#4 Would a gun with the range of 500 to 600 meters be helpful in a close-quarters shooting technique?\nno\nTherefore, the answer to the original question is True"}
{"prompt":"Context: The full circle of a rainbow cannot usually be seen from ground level Sometimes the full circle of a rainbow can be seen from a high building or aircraft You can see more of a rainbow the closer to the horizon the sun is Lunch occurs at midday when the sun is likely high in the sky\nQuestion: Is lunch on the beach a good activity to spot the full circle of a rainbow?\nTake it step by step:","completion":" #1 At what point in the sky is the sun most likely to create a full circle rainbow?\nabove the ground\n#2 At what altitudes are full rainbows more likely to be seen?\nabove the earth\n#3 Is lunchtime at the beach relatively close to conditions above the ground and above the earth?\nyes\nTherefore, the answer to the original question is False"}
{"prompt":"Context: There are two main theories about the origin of the Mona Lisa. The first is that a wealthy noblewoman, the wife of one of Leonardo's friends, sat as the model. Another popular theory is that Leonardo painted her as a cross-gendered self portrait.\nQuestion: Is the Mona Lisa based on a real person?\nTake it step by step:","completion":" #1 Who was the Mona Lisa painting based on?\nLisa Gherardini\n#2 Is Lisa Gherardini a real person?\nno\nTherefore, the answer to the original question is True"}
{"prompt":"Context: Johann Sebastian Bach was married to Maria Barbara Bach from 1707–1720. Johann Sebastian Bach was married to Anna Magdalena Bach from 1721–1750. Maria Barbara Bach died suddenly in 1720.\nQuestion: Did Johann Sebastian Bach leave his first wife for his second wife?\nTake it step by step:","completion":" #1 What dates was Johann Sebastian Bach married to Anna Magdalena Bach?\nDecember 3, 1721\n#2 When did Maria Barbara Bach die?\n1720\n#3 Is 1720 included in December 3, 1721?\nno\nTherefore, the answer to the original question is False"}
{"prompt":"Context: The largest cheeseburger ever made weighed 2,014 pounds. Eddie Hall is the former world record deadlift holder, lifting 1,102 pounds under strongman rules.\nQuestion: Could Eddie Hall hypothetically deadlift the world's largest cheeseburger?\nTake it step by step:","completion":" #1 What is Eddie Hall's record deadlist?\n500 kg\n#2 What is the weight of the world largest cheeseburger?\n2,014 pounds\n#3 Is 500 kg larger than 2,014 pounds?\nno\nTherefore, the answer to the original question is False"}
{"prompt":"Context: Justin Timberlake and Britney Spears dated in 1999. In 2002, Justin Timberlake released a music video for his breakup song 'Cry Me A River' and featured an actress who resembled his then ex Britney Spears.\nQuestion: Has Justin Timberlake ever written a song about Britney Spears?\nTake it step by step:","completion":" #1 Who did Justin Timberlake date in 1999?\nBritney Spears\n#2 Who was the song 'Cry Me A River' by Justin timberlake about?\nBritney Spears\n#3 Is Britney Spears and Britney Spears the same?\nno\nTherefore, the answer to the original question is True"}
{"prompt":"Context: The average high school makes about $41,000. The head coach for NCSU makes about $1.8 million dollars.\nQuestion: Do most high school head coaches make as much as the Head Coach at NCSU?\nTake it step by step:","completion":" #1 What is the average salary for a high school head coach?\nhigh school coaches are primarily tasked with organizing and training football players. This includes creating game plans, evaluating players, and leading the team during competition.\n#2 What is the salary of the head football coach at NCSU?\n$1.8 million\n#3 Is high school coaches are primarily tasked with organizing and training football players. This includes creating game plans, evaluating players, and leading the team during competition. within 5% of $1.8 million?\nno\nTherefore, the answer to the original question is False"}
{"prompt":"Context: The fifth commandment states that Thou Shalt Not Kill. Christopher Columbus ordered a brutal crackdown in which many natives were killed, and then paraded their dismembered bodies through the streets.\nQuestion: Did Christopher Columbus break the fifth commandment in Christianity?\nTake it step by step:","completion":" #1 What is the fifth commandment in Christianity?\nHonor thy father and thy mother\n#2 What activities did Christopher Columbus subject Native Americans too?\nencomienda system\n#3 Is the activity in Honor thy father and thy mother also in encomienda system?\nno\nTherefore, the answer to the original question is True"}
{"prompt":"Context: Primates include lemurs, monkeys, apes, and humans. A Capuchin is a type of monkey that are an average height of twelve inches and weighs nine pounds. A school ruler is twelve inches. One school textbook can weigh up to six pounds.\nQuestion: Can you transport a primate in a backpack?\nTake it step by step:","completion":" #1 What is the average size and weight capacity of a backpack?\n10 kilograms\n#2 What are some common primates?\nMadame Berthe's mouse lemur\n#3 Is any of Madame Berthe's mouse lemur such that its size and weight is less than or equal to 10 kilograms?\nyes\nTherefore, the answer to the original question is True"}
{"prompt":"Context: King Arthur was a legendary British leader who, according to medieval histories and romances, led the defence of Britain against Saxon invaders in the late 5th and early 6th centuries. Anne Boleyn was beheaded May 19, 1536.\nQuestion: Was King Arthur at the beheading of Anne Boleyn?\nTake it step by step:","completion":" #1 When is King Arthur thought to have died?\nearly 6th century\n#2 When was Anne Boleyn born?\n1501\n#3 Is 1501 before early 6th century?\nno\nTherefore, the answer to the original question is False"}
{"prompt":"Context: Miami measures 55.25 mi². Uppsala has an area of 18.83 mi². \nQuestion: Can the city of Miami fit inside Uppsala?\nTake it step by step:","completion":" #1 What is the area of Miami?\n56 square miles\n#2 What is the area of Uppsala?\nUppsala County\n#3 Is 56 square miles less than or equal to Uppsala County?\nno\nTherefore, the answer to the original question is False"}
{"prompt":"Context: As of 2020 the latest Iphone is Iphone 11. As of 2020 the latest Samsung Galaxy phone is the Samsung Galaxy S20.\nQuestion: Does Iphone have more iterations than Samsung Galaxy?\nTake it step by step:","completion":" #1 How many models of the iPhone have been released as of 2020?\n25\n#2 How many models of the Samsung Galaxy have been released as of 2020?\n20\n#3 Is 25 greater than 20?\nno\nTherefore, the answer to the original question is False"}
{"prompt":"Context: Hanuman is a companion of the god Rama. Rama is an avatar of the god Vishnu in Hindu mythology.\nQuestion: Is Hanuman associated with a Norse god?\nTake it step by step:","completion":" #1 Which god is Hanuman associated with?\nRama\n#2 Is Rama in Norse mythology?\nno\nTherefore, the answer to the original question is False"}
{"prompt":"Context: Adam Mickiewicz was a Polish poet.  Adam Mickiewicz 's sonnet sequence focuses heavily on the culture and Islamic religion of the Crimean Tatars.\nQuestion: Did a Polish poet write sonnets about Islamic religion?\nTake it step by step:","completion":" #1 What were the major focus of Adam Mickiewicz's sonnets?\nthe Crimea\n#2 Is the Crimea about Islamic religion?\nThe Crimean Sonnets is an expression of Mickiewicz's interest in the Orient\n#3 Was Adam Mickiewicz a Polish poet?\nwas a Polish poet\n#4 Are The Crimean Sonnets is an expression of Mickiewicz's interest in the Orient and was a Polish poet positive?\nyes\nTherefore, the answer to the original question is True"}
{"prompt":"Context: Space Mountain is an attraction at Disney theme parks Bugs Bunny is a Warner Bros. character Warner Bros. characters appear at Six Flags theme parks\nQuestion: Can you find Bugs Bunny at Space Mountain?\nTake it step by step:","completion":" #1 Where is Space Mountain located?\nfive of the six Disneyland-style Disney Parks\n#2 Which animation studio created Bugs Bunny?\nLeon Schlesinger Productions\n#3 Which entertainment company is five of the six Disneyland-style Disney Parks related to?\nThe Walt Disney Company\n#4 Is Leon Schlesinger Productions part of The Walt Disney Company?\nno\nTherefore, the answer to the original question is False"}
{"prompt":"Context: The Battle of Actium saw Mark Antony's army lose to Octavian. Octavian's army had 400 ships, 16000 infantry, and 3,000 archers. The Brazilian Navy has over 80,000 personnel, including 16,000 marines. Several Brazilian Navy ships are armed with explosive torpedoes. \nQuestion: Could modern Brazilian Navy have hypothetically turned the tide in Battle of Actium?\nTake it step by step:","completion":" #1 What was the result of the Battle of Actium?\nOctavian's victory\n#2 In Octavian's victory, how many resources did the Octavian's army have?\n300 ships\n#3  How many resources does the Brazilian Navy have? \n60,000 active personnel\n#4 Is 60,000 active personnel significantly more than 300 ships?\nyes\nTherefore, the answer to the original question is True"}
{"prompt":"Context: The Greek mythological hero is known for his quest to obtain the Golden Fleece. The Greek mythological hero had four children: Euneus, Nebrophonus, Mermerus, and Pheres. Polo is a sport played between two teams of 4 players.\nQuestion: Could the children of Greek hero Jason hypothetically fill a polo team?\nTake it step by step:","completion":" #1 How many children did Greek mythological hero Jason have?\nbetween one and fourteen\n#2 How many people are needed to make a polo team?\nsix\n#3 Is between one and fourteen equal to or more than six?\nno\nTherefore, the answer to the original question is True"}
{"prompt":"Context: The longest distance swam by a person is 139.8 miles. It is over 1,000 miles from New York to Miami.\nQuestion: Can you swim to Miami from New York?\nTake it step by step:","completion":" #1 What is the longest distance that a human has ever swum?\n225 km (139.8 miles)\n#2 How far does one need to swim to get from New York to Miami?\n13.7-mile\n#3 Is 225 km (139.8 miles) more than 13.7-mile?\nno\nTherefore, the answer to the original question is False"}
{"prompt":"Context: ABBA contained two male and two female members. Mixed doubles tennis games consist of two teams of one man and one woman on each.\nQuestion: Could ABBA play a mixed doubles tennis game against each other?\nTake it step by step:","completion":" #1 How many men and women are required to participate in a mixed doubles tennis game?\none\n#2 How many men and women are members of the ABBA group?\ntwo\n#3 Is two at least equal to one?\nyes\nTherefore, the answer to the original question is True"}
{"prompt":"Context: Aloe vera gel is sometimes kept in plastic packaging. Plastic packaging is derived from petroleum.\nQuestion: Is material from an aloe plant sometimes enclosed in petroleum-derived products?\nTake it step by step:","completion":" #1 What kind of products are derived from petroleum?\npetroleum products that are made up of refined crude oil\n#2 What products are made from aloe plants?\nlotion, gel, soap or cosmetics product\n#3 Is lotion, gel, soap or cosmetics product ever be packaged inside petroleum products that are made up of refined crude oil?\nno\nTherefore, the answer to the original question is True"}
{"prompt":"Context: Hurricane Harvey had maximum winds of 130 MPH. The Peregrine falcon is the fastest animal on Earth. A Peregrine falcon can reach a maximum speed of 240 MPH.\nQuestion: Could Hurricane Harvey catch a Peregrine falcon?\nTake it step by step:","completion":" #1 What was the top speed of Hurricane Harvey?\n130 mph\n#2 What is the top speed of a Peregrine falcon?\n389 km\/h (242 mph).\n#3 Is 130 mph greater than 389 km\/h (242 mph).?\nno\nTherefore, the answer to the original question is False"}
{"prompt":"Context: Electrochemical nerve signals are fired after death that can cause a body to twitch. If death by hanging is accomplished due to asphyxia, the victim may attempt to free themselves or may appear to struggle.\nQuestion: Do bodies movie during hanging?\nTake it step by step:","completion":" #1 What does death by hanging usually induce in victims?\nmedical conditions\n#2 What processes could occur in the nervous system immediately after death?\nSphincters will relax spontaneously and urine and faeces will be evacuated\n#3 Do medical conditions or Sphincters will relax spontaneously and urine and faeces will be evacuated result in body movement?\nyes\nTherefore, the answer to the original question is True"}
{"prompt":"Context: Height is an important factor in playing basketball at a high level. The average NBA player is 6 feet 7 inches tall. Benito Mussolini was 5 feet 6.5 inches tall.\nQuestion: Would Benito Mussolini hypothetically play well in the NBA?\nTake it step by step:","completion":" #1 What is the height of Benito Mussolini?\n29 July 1883 – 28 April 1945) was Prime Minister of Italy\n#2 On average, what is the height of an NBA player?\njust under 6 feet 7 inches\n#3 Is 29 July 1883 – 28 April 1945) was Prime Minister of Italy comparable to just under 6 feet 7 inches?\nno\nTherefore, the answer to the original question is False"}
{"prompt":"Context: US brand Nice creates a number of products including honey. The Western honey bee can be found on every continent except Antarctica. The Western honey bee is the most common pollinator in US, making it the most important bee to domestic agriculture.\nQuestion: Does US brand Nice depend on Western honey bee?\nTake it step by step:","completion":" #1 Which insect does US brand Nice need to obtain the honey they sell from?\nbees\n#2 Is the Western honey bee a common example of bees that can be found in the US?\nno\nTherefore, the answer to the original question is True"}
{"prompt":"Context: Hulk's alter ego is Dr. Robert Bruce Banner Dr. Robert Bruce Banner is a nuclear physicist.  Nuclear physics is the field of physics that studies atomic nuclei and their constituents and interactions. \nQuestion: Can Hulk's alter ego explain atomic events?\nTake it step by step:","completion":" #1 Who is the Hulk's alter ego?\nDr. Robert Bruce Banner\n#2 What is the profession of Dr. Robert Bruce Banner?\nphysicist\n#3 What do people in physicist have a knowledge of?\nthe interactions of matter and energy at all length and time scales in the physical universe\n#4 Is atomic events included in the interactions of matter and energy at all length and time scales in the physical universe?\nno\nTherefore, the answer to the original question is True"}
{"prompt":"Context: A firewall is a computer program that protects unwanted attacks from penetrating a computer. Firewalls are installed on computers and conduct routine background maintenance. A short circuit is an electrical failure resulting from wires unable to conduct currents. Short circuits, especially during updates can lead to the dreaded Windows Blue Screen of Death in which a computer is unable to restart.\nQuestion: Can a firewall protect against a short circuit?\nTake it step by step:","completion":" #1 What kind of threats does a firewall protect a computer system against?\nuntrusted external network\n#2 What are the possible causes and results of a short circuit as concerning computers?\nan excessive current flowing through the circuit\n#3 Is any of an excessive current flowing through the circuit included in untrusted external network?\nyes\nTherefore, the answer to the original question is False"}
{"prompt":"Context: The Swiss Guard is the military of Vatican City and consists of 135 members. There are 186,000 active duty Marines as of 2017.\nQuestion: Would Swiss Guard defeat the Marines?\nTake it step by step:","completion":" #1 How many people are in the Swiss Guard?\n134\n#2 How many people are in the US Marine Corp?\n186,000\n#3 Is 134 greater than or equal to 186,000?\nno\nTherefore, the answer to the original question is False"}
{"prompt":"Context: Blaire White is a Youtuber. Blaire White posts content that leans towards conservative politics.\nQuestion: Does conservatism repulse Blaire White?\nTake it step by step:","completion":" #1 What is Blaire White's political orientation as evidenced by her expressions?\ncenter-right\n#2 Is center-right completely devoid of conservatism?\nyes\nTherefore, the answer to the original question is False"}
{"prompt":"Context: Hair grows from the skin. Skeletons are a structure of multiple bones. Bones do not grow hair. \nQuestion: Do skeletons have hair?\nTake it step by step:","completion":" #1 Where does hair grow from?\nfollicles\n#2 What are skeletons made out of?\nboth fused and individual bones\n#3 Does both fused and individual bones have follicles?\nno\nTherefore, the answer to the original question is False"}
{"prompt":"Context: The book \"War of the Worlds\" was published in 1898. Cosmic rays were not discovered until 1912.\nQuestion: Did H.G. Wells' \"War of the Worlds\" include cosmic rays?\nTake it step by step:","completion":" #1 When was the War of the Worlds published?\n1898\n#2 When were cosmic rays discovered?\n1912\n#3 Did 1912 come before 1898?\nyes\nTherefore, the answer to the original question is False"}
{"prompt":"Context: Jeffrey Atkins is a rapper better known as Ja Rule. Ja Rule released the diss track \"Loose Change\" in April 2003, where he attacks 50 Cent. In 2018 50 cent responded to a Ja Rule diss by purchasing and vacating the first 4 rows of Ja Rule's concert.\nQuestion: Does 50 Cent get along with Jeffrey Atkins?\nTake it step by step:","completion":" #1 What artists was Jeffrey Atkins critical of in his song Loose Change?\n50 Cent, as well as Eminem, Busta Rhymes and Dr. Dre\n#2 Is 50 Cent outside the group of 50 Cent, as well as Eminem, Busta Rhymes and Dr. Dre?\nno\nTherefore, the answer to the original question is False"}
{"prompt":"Context: The YMCA was written about in a widely popular song by \"The Village People\" The Village People's song \"YMCA\" had an easy to do and very popular dance routine that went with it.  The song \"YMCA\" is extremely well known.\nQuestion: Is it normal for people to sing when the YMCA is mentioned?\nTake it step by step:","completion":" #1 In what song was the YMCA written about?\nHot Cop\n#2 Is Hot Cop a very popular song?\nyes\nTherefore, the answer to the original question is True"}
{"prompt":"Context: Members of NFL teams play football Infantry training is provided to members of the US armed forces\nQuestion: Do members of NFL teams receive infantry training?\nTake it step by step:","completion":" #1 Which group(s) are entitled to infantry training?\nenlisted United States Marines\n#2 Are members of the NFL team one of enlisted United States Marines?\nno\nTherefore, the answer to the original question is False"}
{"prompt":"Context: Christianity is the major religion in Quebec. Christians refer to the Bible as their book of reference.\nQuestion: Do most religious people in Quebec refer to the Quran?\nTake it step by step:","completion":" #1 What is the dominant religion in Quebec?\nRoman Catholic\n#2 Do adherents of Roman Catholic commonly refer to the Quran?\nyes\nTherefore, the answer to the original question is False"}
{"prompt":"Context: Hurricanes often strike the Gulf of Mexico Hurricane season in the gulf lasts until the end of November Halloween is October 31\nQuestion: Is a Halloween cruise in the Gulf of Mexico likely to be safe from storms?\nTake it step by step:","completion":" #1 Which storms are a common occurrence in the Gulf of Mexico?\ntropical storm\n#2 What time of the year is Halloween celebrated?\n31 October\n#3 According to known patterns, are any of tropical storm likely to happen during 31 October?\nyes\nTherefore, the answer to the original question is False"}
{"prompt":"Context: Billie Eilish is a famous female singer. Billie Eilish is 18 years old and has a net worth of $25 Million.  A Porsche Boxster is a car that starts at $59,000. $25,000,000 is greater than $59,000.\nQuestion: Can Billie Eilish afford a Porsche?\nTake it step by step:","completion":" #1 What is Billie Eilish's net worth?\n2019\n#2 How much does a Porsche cost?\nUS$448,000\n#3 Is 2019 greater than US$448,000?\nno\nTherefore, the answer to the original question is True"}
{"prompt":"Context: Secretariat is a famous race horse Formula One is an auto racing championship\nQuestion: Did Secretariat win a Formula One championship?\nTake it step by step:","completion":" #1 What is Secretariat?\nan American Thoroughbred racehorse\n#2 What is an American Thoroughbred racehorse's top speed?\n1:33​2⁄5\n#3 What is the top speed for a Formula One car?\n350 km\/h (215 mph).\n#4 Is 1:33​2⁄5 greater than 350 km\/h (215 mph).?\nno\nTherefore, the answer to the original question is False"}
{"prompt":"Context: Robert Downey Jr. plays Iron Man in the MCU. At the end of Avengers: Endgame, Iron Man uses the Infinity Stones against Thanos. The stones are too powerful for his human body to handle, so he dies after using them.\nQuestion: Does Robert Downey Jr's Marvel Cinematic Universe character survive the Infinity War?\nTake it step by step:","completion":" #1 What is Robert Downey Jr's character in Infinity War?\nStark\n#2 Does Stark survive to the end of Infinity War?\nno\nTherefore, the answer to the original question is False"}
{"prompt":"Context: The James Webb Space Telescope is the most powerful telescope created. Krypton is a planet in the fictional Superman comic book series.\nQuestion: Does James Webb Space Telescope fail astronomer in locating planet Krypton?\nTake it step by step:","completion":" #1 Which universe does the planet Krypton exist in?\nSuperman\n#2 Does the James Webb Space Telescope as we know it exist in a universe different from Superman?\nyes\nTherefore, the answer to the original question is True"}
{"prompt":"Context: The woodlice family of crustaceans is terrestrial. There are also many crustacean species living in fresh water rivers and lakes.\nQuestion: Do all crustaceans live in the ocean?\nTake it step by step:","completion":" #1 What are some common families of crustaceans?\ncrabs, lobsters, crayfish, shrimps, prawns, krill, woodlice, and barnacles\n#2 Is there any of crabs, lobsters, crayfish, shrimps, prawns, krill, woodlice, and barnacles that lives in a terrestrial habitat?\nterrestrial crabs\n#3 Do any of crabs, lobsters, crayfish, shrimps, prawns, krill, woodlice, and barnacles that are aquatic also live in freshwater?\nThe majority of crustaceans are aquatic, living in either marine or freshwater environments\n#4 Are terrestrial crabs and The majority of crustaceans are aquatic, living in either marine or freshwater environments negative?\nno\nTherefore, the answer to the original question is False"}
{"prompt":"Context: The Warsaw Ghetto existed during the second world war. Cell phones with video recording capability did not exist until the 2000s.\nQuestion: Did the population of the Warsaw Ghetto record secret police on cell phones?\nTake it step by step:","completion":" #1 When was the Warsaw Ghetto in existence?\nWorld War II\n#2 When was the first cell phone capable of recording developed?\n1973\n#3 Is 1973 before the end of World War II?\nno\nTherefore, the answer to the original question is False"}
{"prompt":"Context: John Lennon died in 1980. Sasha Obama was born in 2001.\nQuestion: Was John Lennon known to be a good friend to Sasha Obama?\nTake it step by step:","completion":" #1 When was Sasha Obama born?\nJune 10, 2001\n#2 When did John Lennon die?\n8 December 1980\n#3 Is June 10, 2001 before 8 December 1980?\nno\nTherefore, the answer to the original question is False"}
{"prompt":"Context: The potato tuber moth is a parasite that targets the plant family Solanaceae, including eggplant  Selenops radiatus is a spider genus in South Africa that effectively controls the potato tuber moth\nQuestion: Can spiders help eggplant farmers control parasites?\nTake it step by step:","completion":" #1 Which major parasite insect are eggplants host plants to?\npotato tuber moth\n#2 What are the natural enemies of potato tuber moth that farmers can use to control them?\nparasitic wasps, aphid midge larvae, \"aphid lions\" (the larvae of green lacewings), and arachnids such as crab spiders\n#3 Is any of parasitic wasps, aphid midge larvae, \"aphid lions\" (the larvae of green lacewings), and arachnids such as crab spiders a spider?\nyes\nTherefore, the answer to the original question is True"}
{"prompt":"Context: Darth Vader is portrayed as a man who always appears in black full-body armor and a mask. Severus Snape is portrayed as a white man with long, greasy black hair who often wears a cloak. \nQuestion: Does Darth Vader's character resemble Severus Snape?\nTake it step by step:","completion":" #1 What type of clothing does Darth Vader wear?\nblack armor\n#2 What type of clothing does Severus Snape wear?\nblack, flowing robes\n#3 Are there any significant similarities between black armor and black, flowing robes?\nyes\nTherefore, the answer to the original question is False"}
{"prompt":"Context: Organs are groups of tissues that perform a similar function. The whole of a carrot is a root. A root is a plant organ. You cannot transplant the entire carrot into another carrot.\nQuestion: Can a carrot receive an organ transplant?\nTake it step by step:","completion":" #1 What part of the plant is the carrot?\ntaproot\n#2 Does taproot have organs?\nyes\nTherefore, the answer to the original question is False"}
{"prompt":"Context: DID is an abbreviation for 'Dissociative Identity Disorder.' DID is characterized by gaps in memory, as well as altered states or 'personalities' during these dissociative moments.\nQuestion: Do people with DID have a good memory?\nTake it step by step:","completion":" #1 What does DID stand for?\nDissociative identity disorder\n#2 What is Dissociative identity disorder characterized by?\nthe maintenance of at least two distinct and relatively enduring personality states\n#3 Would be with the maintenance of at least two distinct and relatively enduring personality states have good memory?\nno\nTherefore, the answer to the original question is False"}
{"prompt":"Context: Pandora was a mythical figure that opened a box and released several ills on the world including famine, sickness, and death. The Four Horsemen of the Apocalypse are: Pestilence, War, Famine, and Death.\nQuestion: Were items released from Pandora's box at least two of the names of Four Horsemen?\nTake it step by step:","completion":" #1 What items were released from Pandora's box?\nevils\n#2 What were the names of the Four Horsemen\nThe fourth and final horse is pale green, and upon it rides Death accompanied by Hades\n#3 Is there any overlap between evils and The fourth and final horse is pale green, and upon it rides Death accompanied by Hades?\nyes\nTherefore, the answer to the original question is True"}
{"prompt":"Context: The scientific revolution took place in the 16th and 17th centuries. The iPhone came out in the 21st century.\nQuestion: Did the iPhone usher in the scientific revolution?\nTake it step by step:","completion":" #1 When did the Scientific Revolution begin?\n1543\n#2 When did the iPhone come out?\nJune 29, 2007\n#3 Did June 29, 2007 occur before 1543?\nno\nTherefore, the answer to the original question is False"}
{"prompt":"Context: San Francisco is a major US city with over 800,000 people. San Francisco is known for mass transit and being a metropolitan area.\nQuestion: Would someone go to San Francisco for a nature escape?\nTake it step by step:","completion":" #1 What kind of developed human settlement is San Francisco?\nThe City by the Bay\n#2 Are The City by the Bay's known for nature?\nyes\nTherefore, the answer to the original question is False"}
{"prompt":"Context: Items sink if they are denser than the surrounding material. Parsley has a density of 0.26 g\/cm^3 when fresh. Milk has a density of 1.026 g\/cm^3.\nQuestion: Does parsley sink in milk?\nTake it step by step:","completion":" #1 What is the density of parsley?\nPars\n#2 What is the density of milk?\nwhite liquid food\n#3 Is Pars greater than white liquid food?\nno\nTherefore, the answer to the original question is False"}
{"prompt":"Context: Woodrow Wilson took 41% of the vote. Theodore Roosevelt took 27% of the vote. William Howard Taft took 23% of the vote. Eugene Debs took 6% of the vote. A majority is more than 50%.\nQuestion: Did anyone in the 1912 election take a majority of the popular vote?\nTake it step by step:","completion":" #1 What percentage of votes would constitute a majority?\nmore than half\n#2 What percentage of votes did the winner of the 1912 presidential election receive?\n41.8%\n#3 Does 41.8% fall within the range of more than half?\nno\nTherefore, the answer to the original question is False"}
{"prompt":"Context: The Black Death is a bacterial disease called bubonic plague. Yersinia pestis has been found to grow and thrive inside amoebas. Bubonic plague is caused by Yersinia pestis.\nQuestion: Could amoebas have played a part in the Black Death?\nTake it step by step:","completion":" #1 Which disease is referred to as the Black Death?\nPestilence\n#2 Which specific organism is responsible for Pestilence?\nYersinia pestis\n#3 Could Yersinia pestis be hosted by amoeba?\nyes\nTherefore, the answer to the original question is True"}
{"prompt":"Context: P. G. Wodehouse was born in 1881. The internet was not conceived of until 1965. \nQuestion: Did P. G. Wodehouse like the internet as a child?\nTake it step by step:","completion":" #1 When was P. G. Wodehouse born?\n15 October 1881\n#2 When was the internet invented?\n1995\n#3 Did 15 October 1881 come before or during 1995?\nyes\nTherefore, the answer to the original question is False"}
{"prompt":"Context: H.G. Wells's book The Invisible Man has been adapted into more than 7 films. Joan Lindsay's book Picnic at Hanging Rock was adapted into one film and one TV series.\nQuestion:  Is The Invisible Man more prevalent in films than Picnic at Hanging Rock?\nTake it step by step:","completion":" #1 How many films have been made of \"The Invisible Man\"\n1940\n#2 How many films have been made of Picnic at Hanging Rock?\n1975\n#3 Is 1940 larger than 1975?\nyes\nTherefore, the answer to the original question is True"}
{"prompt":"Context: ABBA was a 1970's music group that specialized in Disco music. Pop artist Dua Lipa's 2020 album, Future Nostalgia, was described by Rolling Stone as , \"The Disco Liberation We Need.\" Magnetic Magazine released an article in 2020 entitled, \"The Best Disco and Funk Tracks of 2020.\"\nQuestion: Is ABBA's 1970's genre still relevant today?\nTake it step by step:","completion":" #1 What genre of music did music group ABBA specialize in in the 1970's?\ndisco\n#2 Are disco still relevant today?\nyes\nTherefore, the answer to the original question is True"}
{"prompt":"Context: The Aztecs cultivated cacti for the fruit Tenochtitlan was the capital of the Aztec empire Cuauhtémoc was the last king of Tenochtitlan \nQuestion:  Is cactus fruit an important menu item for a restaurant based on Cuauhtémoc?\nTake it step by step:","completion":" #1 Where city was Cuauhtémoc the king of?\nTenochtitlan\n#2 What empire was Tenochtitlan the capital of?\nAztec Empire\n#3 Did people in Aztec Empire eat cacti?\nno\nTherefore, the answer to the original question is True"}
{"prompt":"Context: Euphoria is a state in which people experience intense feelings that overwhelm their body. Rumi was a 13th century Persian poet that was also a dervish. Dervishes participated in ceremonies in which they experienced religious ecstasy. Religious ecstasy is an altered state of consciousness characterized by visions and emotional (and sometimes physical) euphoria.\nQuestion: Did Rumi spend his time in a state of euphoria?\nTake it step by step:","completion":" #1 What religious practices did Rumi engage in?\nSufi\n#2 What emotional experiences are associated with Sufi?\necstasy, and trance\n#3 Is euphoria among ecstasy, and trance?\nyes\nTherefore, the answer to the original question is True"}
{"prompt":"Context: There is a region in California called the Silicon Valley. Silicon Valley is home to a large number of technology corporations. Silicon Valley was originally named after the large number of corporations there that manufactured silicon-based circuit chips.\nQuestion: Is silicon important in California?\nTake it step by step:","completion":" #1 Which industrial area in California is named after silicon?\nSilicon Valley\n#2 What kind of companies are prevalent in Silicon Valley?\nstartup\n#3 What kind of products do startup make?\nsemiconductor\n#4 Is silicon an important raw material for semiconductor?\nyes\nTherefore, the answer to the original question is True"}
{"prompt":"Context: Lord Voldemort wanted to rid the wizarding world of half blood wizards. Lord Volemort was born a half blood, part muggle part wizard.\nQuestion: Would Lord Voldemort have been barred from Hogwarts under his own rules?\nTake it step by step:","completion":" #1 What kinds of people did Lord Voldemort want to prohibit from Hogwarts?\nnon-pure-blood wizards\n#2 What was Lord Voldemort born as?\nTom\n#3 Is non-pure-blood wizards the same as Tom?\nno\nTherefore, the answer to the original question is True"}
{"prompt":"Context: A CPU circuit chip is about an inch across. A housekey is generally less than a half-inch across.\nQuestion: Would a modern central processing unit circuit chip fit on a housekey?\nTake it step by step:","completion":" #1 What is the size of a CPU Circuit chip across?\na human fingernail\n#2 How long is an average house key?\nkey design since, the majority of locks today are still variants of the designs invented by Bramah, Chubb and Yale.\n#3 Is a human fingernail less than key design since, the majority of locks today are still variants of the designs invented by Bramah, Chubb and Yale.?\nyes\nTherefore, the answer to the original question is False"}
{"prompt":"Context: Pancakes contain the dairy product milk as one of the main ingredients. After 6 months cats lose the enzyme lactase that breaks down lactose, which makes them lactose intolerant. Cats that drink milk can suffer from upset stomach and vomiting.\nQuestion: Are pancakes a bad snack for cats?\nTake it step by step:","completion":" #1 What are the three major ingredients of pancake?\neggs, milk and butter\n#2 Which substance do cats lose the ability to break down after six months?\nsugar\n#3 Does any of eggs, milk and butter contain sugar?\nyes\nTherefore, the answer to the original question is True"}
{"prompt":"Context: Schools across the US have been struggling with school lunch debts. News articles have been published about students being turned away from the cafeteria due to outstanding debts for lunches.\nQuestion: Are all students guaranteed lunch at school in the US?\nTake it step by step:","completion":" #1 How effectively have schools across the US been managing lunch debts?\none in four school districts\n#2 According to news articles, how are students with lunch debts treated at the cafeteria?\nshaming\n#3 Does 'excellently' describe one in four school districts and shaming?\nyes\nTherefore, the answer to the original question is False"}
{"prompt":"Context: Methane is a gas. Methane is colorless. Methane is odorless.\nQuestion: Can methane be seen by the naked eye?\nTake it step by step:","completion":" #1 What is the color of methane?\ncolorless\n#2 Can colorless gases be seen by the naked eye?\nno\nTherefore, the answer to the original question is False"}
{"prompt":"Context: Alcatraz Island was a San Francisco Bay prison. Siberia is over 5,217 miles away from San Francisco. The longest continuous swim record was 139 miles.\nQuestion: Could an escapee swim nonstop from Alcatraz island to Siberia?\nTake it step by step:","completion":" #1 How far is Alcatraz from Siberia?\n1.25 miles\n#2 How far is the record longest swim?\n139.8 miles)\n#3 Is 139.8 miles) equal to or greater than 1.25 miles?\nno\nTherefore, the answer to the original question is False"}
{"prompt":"Context: Olaf is a popular character in Disney's Frozen series. Olaf is a snowman, accidentally enchanted to life by Elsa while she magically builds her ice tower.\nQuestion: Is there a popular Disney character made from living ice?\nTake it step by step:","completion":" #1 Which popular Disney character did Elsa accidentally enchant to life while building her ice tower?\nOlaf\n#2 Was Olaf made of snow\/ice?\nyes\nTherefore, the answer to the original question is True"}
{"prompt":"Context: A blooming onion is a dish for sharing, featuring a sliced and deep fried onion made to resemble petals. A shallot is very small and would only make a few \"petals\"\nQuestion: Would a blooming onion be possible with a shallot?\nTake it step by step:","completion":" #1 What characteristics of onions are important when making blooming onion dish?\ncut to resemble a flower\n#2 Do the characteristics of shallot match with all of cut to resemble a flower?\nno\nTherefore, the answer to the original question is False"}
{"prompt":"Context: Felines are a species of animals that include lions, tigers, and domestic cats. Friday is named after the Norse goddess Freya.  Freya is often depicted in art with cats. Freya had two cats that pulled her magical chariot.\nQuestion: Did goddess Friday is named after despise felines?\nTake it step by step:","completion":" #1 Which goddess is Friday named after?\nVenus\n#2 Which animals pulled Venus's chariots?\ncat\n#3 Are felines excluded from cat?\nyes\nTherefore, the answer to the original question is False"}
{"prompt":"Context: Mary, Queen of Scots was the queen of Scotland whose rivalry with Elizabeth I led to her beheading. Mary, Queen of Scots son became King of England as James I. The Gunpowder plot was a 1605 plot to blow up Parliament and King James I. The Gunpowder plot failed and the conspirators were executed. King James I was succeeded by his son, Charles I of England.\nQuestion: Did the Gunpowder plot eliminate Mary, Queen of Scots bloodline?\nTake it step by step:","completion":" #1 In what year did the Gunpowder Plot happen?\n1605\n#2 Of the descendants of Mary, Queen of Scots, what is the birth year of the person who died most recently?\n6 August 1889 – 5 November 1961\n#3 Is 1605 within the range of 6 August 1889 – 5 November 1961?\nno\nTherefore, the answer to the original question is False"}
{"prompt":"Context: Sockington is a domestic cat Onions can cause toxicity in cats by breaking down their red blood cells\nQuestion: Does Sockington enjoy onions?\nTake it step by step:","completion":" #1 What kind of creature is Sockington?\ndomestic cat\n#2 Are onions harmless to domestic cat?\nyes\nTherefore, the answer to the original question is False"}
{"prompt":"Context: A monarch is the head of a monarchy and was appointed for life. Hapshetsut was the second known female pharaoh. Pharaohs ruled for life and their wealth was even buried with them to take into the afterlife.\nQuestion: Would Hapshetsut be considered a monarch?\nTake it step by step:","completion":" #1 What kind of leader was Hatshepsut?\nfifth pharaoh\n#2 What was the nature of the leadership of a fifth pharaoh?\ncommander-in-chief of the army\n#3 What is the nature of a monarch's rule?\nsovereign head of state in a monarchy. A monarch may exercise the highest authority and power in the state, or others may wield that power on behalf of the monarch. Usually a monarch either personally inherits the lawful right to exercise the state's sovereign rights (often referred to as the throne or the crown) or is selected by an established process from a family or cohort eligible to provide the nation's monarch. Alternatively, an individual may become monarch by right of conquest, acclamation or a combination of means. A monarch usually reigns for life or until abdication\n#4 Is commander-in-chief of the army very similar to sovereign head of state in a monarchy. A monarch may exercise the highest authority and power in the state, or others may wield that power on behalf of the monarch. Usually a monarch either personally inherits the lawful right to exercise the state's sovereign rights (often referred to as the throne or the crown) or is selected by an established process from a family or cohort eligible to provide the nation's monarch. Alternatively, an individual may become monarch by right of conquest, acclamation or a combination of means. A monarch usually reigns for life or until abdication?\nyes\nTherefore, the answer to the original question is True"}
{"prompt":"Context: Rand Paul is a senator from Kentucky. Rand Paul was an ophthalmologist in Kentucky with ABO certification. The National Board of Ophthalmology does not recognize ABO certification. Kentucky does not require ophthalmologists to be certified. NY ophthalmologists must have approved application for licensure certifications.\nQuestion: Can a New Yorker get their eyes checked by Rand Paul legally?\nTake it step by step:","completion":" #1 What certifications does NY require of ophthalmologists?\na degree in medicine\n#2 Does Rand Paul have a degree in medicine?\nyes\nTherefore, the answer to the original question is False"}
{"prompt":"Context: The Hulk is a Marvel comics character. The Hulk is said to be around 8 feet tall and weigh around 1400 pounds. An African elephant can carry up to 9,000 kg, or 19,841 pounds.\nQuestion: Hypothetically, will an African elephant be crushed by Hulk on its back?\nTake it step by step:","completion":" #1 How big is the Hulk?\nbetween 7 and 8 feet\n#2 How much can an African elephant carry?\n2,160–3,232 kg\n#3 Is between 7 and 8 feet greater than 2,160–3,232 kg?\nno\nTherefore, the answer to the original question is False"}
{"prompt":"Context: Modafinil is a powerful wakefulness drug, typically prescribed at 100mg or 200mg per day doses. Suicide attempts with up to 5,000mg of Modafinil have been unsuccessful. \nQuestion: Would Modafinil be effective in completing a suicide?\nTake it step by step:","completion":" #1 What is Modafinil?\na medication to treat sleepiness\n#2 What are the effects of taking too much a medication to treat sleepiness?\nsleep disturbances, nausea, and diarrhea\n#3 Would someone who wanted to commit suicide want to sleep disturbances, nausea, and diarrhea?\nyes\nTherefore, the answer to the original question is False"}
{"prompt":"Context: The Jewish religion regards the Old Testament as their holy book. The New Testament of the bible is not acknowledged by Jewish religious people. The Ten Commandments are in the Old Testamanet.\nQuestion: Were the Ten commandments the part of the bible that Jewish people do not believe in?\nTake it step by step:","completion":" #1 What parts of the Bible do Jews not accept?\nOld Testament\n#2 What part of the Bible are the Ten Commandments in?\nthe books of Exodus and Deuteronomy\n#3 Is the books of Exodus and Deuteronomy also listed in Old Testament?\nno\nTherefore, the answer to the original question is False"}
{"prompt":"Context: Dr. Seuss's real name was Theodor Geisel. Theodor Geisel was married to Helen Palmer at the time of her suicide. Theodor Geisel is quoted having said he considered suicide after the death of his wife.\nQuestion: Did the death of Helen Palmer have a significant effect on Dr. Seuss?\nTake it step by step:","completion":" #1 What relatives did Helen Palmer have when she died?\nTed's niece Peggy\n#2 What is Dr. Suess's real name?\nTheodor Seuss \"Ted\" Geisel\n#3 Is Theodor Seuss \"Ted\" Geisel one of Ted's niece Peggy?\nyes\nTherefore, the answer to the original question is True"}
{"prompt":"Context: The Federal Reserve building is headquartered in Washington, D.C. The Space Needle is located in Seattle, Washington. There are over 2700 miles from Seattle, Washington to Washington, D.C.\nQuestion: Is the Federal Reserve a quick walk from Space Needle?\nTake it step by step:","completion":" #1 Where is the Space Needle located?\nSeattle\n#2 Where is the headquarters of Federal Reserve located?\nConstitution Avenue\n#3 Can the distance between Seattle and Constitution Avenue be covered quickly by walking?\nyes\nTherefore, the answer to the original question is False"}
{"prompt":"Context: Eric Clapton's mother was 16 years old at the time of his birth. As of 2020, federal law required states comply with a minimum age of 21 years for sale\/purchase of tobacco products.\nQuestion: Would Eric Clapton's mother hypothetically be unable to legally purchase cigarettes in the USA at his birth?\nTake it step by step:","completion":" #1 How old was Eric Clapton's mom when he was born?\n16\n#2 How old must you be to legally buy cigarettes in the USA?\n21\n#3 Is 21 greater than 16?\nno\nTherefore, the answer to the original question is True"}
{"prompt":"Context: Casio's first invention was the yubiwa pipe. The yubiwa pipe was a ring worn that held a cigarette in place worn on the finger. Ankles are several inches thicker than fingers.\nQuestion: Could Casio's first invention be worn around the ankle?\nTake it step by step:","completion":" #1 What was Casio's first invention?\nyubiwa pipe\n#2 Where was yubiwa pipe worn?\nfinger ring\n#3 What is the largest diameter of finger ring?\nmillimeters\n#4 What is the smallest diameter of ankle?\ntalocrural\n#5 Is talocrural less than or equal to millimeters?\nyes\nTherefore, the answer to the original question is False"}
{"prompt":"Context: Robin Williams was the father of Zelda Williams.  Robin Williams was an only child. A cousin is the child of a parent's siblings.  Only children do not have siblings.\nQuestion: Does Zelda Williams have any cousins on her father's side?\nTake it step by step:","completion":" #1 Who was Zelda Williams's father?\nRobin Williams\n#2 Does Robin Williams have any siblings?\nyes\nTherefore, the answer to the original question is False"}
{"prompt":"Context: The Toronto Star has a classifieds section Readers can advertise their own labor or services and thus their time \nQuestion: Can someone sell their time through the Toronto Star?\nTake it step by step:","completion":" #1 What section of the Toronto Star lists things for sale?\nwheels.ca\n#2 Can someone's services or labor be sold in wheels.ca?\nyes\nTherefore, the answer to the original question is True"}
{"prompt":"Context: A Snickers bar contains chocolate. Chocolate is harmful or even toxic to dogs. Poodles are a breed of dog.\nQuestion: Is it wise to feed a Snickers bar to a poodle?\nTake it step by step:","completion":" #1 What are poodles a breed of?\nformal dog\n#2 What substances are harmful to formal dog?\ncommon human foods and household ingestibles\n#3 What is a Snickers make out of?\nnougat, peanuts, and caramel\n#4 Is there no overlap between common human foods and household ingestibles and nougat, peanuts, and caramel?\nno\nTherefore, the answer to the original question is False"}
{"prompt":"Context: An airline with a perfect operation record has no crashes or other damaging incidents. United Airlines has had over 30 crash incidents over several decades.\nQuestion: Does United Airlines have a perfect operation record?\nTake it step by step:","completion":" #1 What must an airline avoid if they want a perfect operation record?\nimpact on business operations\n#2 Is United Airlines free of impact on business operations?\nno\nTherefore, the answer to the original question is False"}
{"prompt":"Context: Sea Otters are endangered marine mammals. Long John Silver's is an american fast food chain that serves seafood. Long John Silver's does not serve meat from mammals.\nQuestion: Does Long John Silver's serve sea otter?\nTake it step by step:","completion":" #1 What classes of animals does Long John Silver's serve food from?\nlobster\n#2 To which class of animals does the sea otter belong?\nmarine mammals\n#3 Is marine mammals listed in lobster?\nyes\nTherefore, the answer to the original question is False"}
{"prompt":"Context: Parachuting involves jumping from high places or airplanes. Matt Damon is afraid of heights. \nQuestion: Would Matt Damon be afraid of parachuting?\nTake it step by step:","completion":" #1 What is Matt Damon afraid of?\nHe is ranked among Forbes magazine's most bankable stars and is one of the highest-grossing actors of all time\n#2 Does parachuting involve He is ranked among Forbes magazine's most bankable stars and is one of the highest-grossing actors of all time?\nno\nTherefore, the answer to the original question is True"}
{"prompt":"Context: The colors of the Marlboro package are red, white, and black. The French flag has the colors red, white, and blue.\nQuestion: Are the colors on Marlboro package found on French flag?\nTake it step by step:","completion":" #1 What are the colors of a Marlboro package?\nred and white\n#2 What are the colors of the French flag?\nblue (hoist side), white, and red\n#3 Is red and white identical to blue (hoist side), white, and red?\nno\nTherefore, the answer to the original question is False"}
{"prompt":"Context: Richard Wagner died in 1883. Televisions started to be developed in the 1920s.\nQuestion: Did Richard Wagner compose the theme songs for two television series?\nTake it step by step:","completion":" #1 When did the television first become available?\nlate 1920s\n#2 When did Richard Wagner die?\n13 February 1883\n#3 Is late 1920s before 13 February 1883?\nno\nTherefore, the answer to the original question is False"}
{"prompt":"Context: Turkey enjoys a wide variety of regional variations of börek among the different cultures and ethnicities composing it. Börek is very popular in the cuisines of the former Ottoman Empire, especially in North Africa and throughout the Balkans. Recep Tayyip Erdoğan is the current president of Turkey and he was born and raised there.\nQuestion: Would Recep Tayyip Erdoğan be unfamiliar with börek?\nTake it step by step:","completion":" #1 Where was Recep Tayyip Erdoğan born?\nKasımpaşa\n#2 In which regions is börek part of the normal cuisine?\nthe Balkans, the South Caucasus, Levant, Mediterranean, and other countries in Eastern Europe and Western Asia\n#3 Is Kasımpaşa not part of the Balkans, the South Caucasus, Levant, Mediterranean, and other countries in Eastern Europe and Western Asia?\nyes\nTherefore, the answer to the original question is False"}
{"prompt":"Context: Naruhito is the Emperor of Japan. Romance of the Three Kingdoms was a 14th century historical novel about the Three Kingdoms Period. The Three Kingdoms Period was the division of China among the states of Wei, Shu, and Wu.\nQuestion: Are Naruhito's ancestors the focus of Romance of the Three Kingdoms?\nTake it step by step:","completion":" #1 Where are the ancestors of Naruhito from?\nRoman Catholicism\n#2 What country is the novel Romance of the Three Kingdoms set in?\nChinese: 三国演义; traditional Chinese: 三國演義; pinyin: Sānguó Yǎnyì) is a 14th-century historical novel attributed to Luo Guanzhong. It is set in the turbulent years towards the end of the Han dynasty\n#3 Are Roman Catholicism and Chinese: 三国演义; traditional Chinese: 三國演義; pinyin: Sānguó Yǎnyì) is a 14th-century historical novel attributed to Luo Guanzhong. It is set in the turbulent years towards the end of the Han dynasty the same?\nno\nTherefore, the answer to the original question is False"}
{"prompt":"Context: Mike DeWine is Governor of Ohio Felicity Huffman is a resident of California\nQuestion: Would Felicity Huffman vote for Mike DeWine?\nTake it step by step:","completion":" #1 What elected office is held by Mike DeWine?\nGovernor\n#2 What state is Mike DeWine Governor of?\nOhio\n#3 What state does Felicity Huffman live in?\nCalifornia\n#4 Are Ohio and California the same state?\nno\nTherefore, the answer to the original question is False"}
{"prompt":"Context: The host of the Colbert report is Stephen Colbert. Stephen Colbert has spoken against Donald Trump multiple times on various platforms.\nQuestion: Would the host of The Colbert Report be likely to vote for Trump?\nTake it step by step:","completion":" #1 Who is the host of The Colbert Report show?\nStephen Colbert\n#2 Has Stephen Colbert said more positive things than negative things about Trump?\nyes\nTherefore, the answer to the original question is False"}
{"prompt":"Context: The father of social security system is Franklin D. Roosevelt.  Franklin D. Roosevelt was in Columbia Law School in 1907. \nQuestion: Was the father of social security system serving in the white house during the Panic of 1907?\nTake it step by step:","completion":" #1 Who is the father of the social security system?\nEdwin Emil Witte\n#2 What position serves in the White House?\npresident\n#3 When did Edwin Emil Witte serve as president?\n1935\n#4 Is 1907 in the range of 1935?\nyes\nTherefore, the answer to the original question is False"}
{"prompt":"Context: All forms of cancer qualify as diagnoses that can result in disability. Disability is not determined by diagnosis, but by degree of impairment. Some cancer patients do not experience major impairment.\nQuestion: Do all cancer patients get disability?\nTake it step by step:","completion":" #1 What is disability determined by?\nthe interaction between features of a person’s body and features of the society in which he or she lives\n#2 Do all patients of cancer have the same degree of the interaction between features of a person’s body and features of the society in which he or she lives?\nno\nTherefore, the answer to the original question is False"}
{"prompt":"Context: Harry Potter and the Philosopher's Stone was a 1997 children's fantasy book. The Albanian Civil War, also called the Albanian Civil Unrest, happened in 1997.\nQuestion: Did children read Harry Potter and the Philosopher's Stone during the Albanian Civil War?\nTake it step by step:","completion":" #1 What year was Harry Potter and the Philosopher's Stone published?\n1998\n#2 What year was the Albanian Civil War?\n1997\n#3 Did 1998 not after 1997?\nyes\nTherefore, the answer to the original question is True"}
{"prompt":"Context: In 1967, Schwarzenegger won the Munich stone-lifting contest, in which a stone weighing 508 German pounds (254 kg \/ 560 lb) is lifted between the legs while standing on two footrests. Red foxes weigh between 2.2–14 kg (5–31 lb).\nQuestion: Would Arnold Schwarzenegger have a hard time picking up a red fox in 1967?\nTake it step by step:","completion":" #1 How much could Arnold Schwarzenegger life in 1967?\n508 German pounds (254 kg \/ 560 lb) is lifted between the legs while standing on two footrests\n#2 What is the typical weight of a Red Fox?\n2.2–14 kg (5–31 lb),\n#3 Is 2.2–14 kg (5–31 lb), more than 508 German pounds (254 kg \/ 560 lb) is lifted between the legs while standing on two footrests?\nno\nTherefore, the answer to the original question is False"}
{"prompt":"Context: The Six-Day War took place between June 5th-June 10th, 1967. There are 24 hours in a day. An NBA game consists of four quarters that are 12 minutes long and a 15 minute long halftime. There are 60 minutes in an hour.\nQuestion: Could an NBA game be completed within the span of the Six-Day War?\nTake it step by step:","completion":" #1 How long did the Six-day War last?\nbetween 5 and 10 June 1967\n#2 How long does a basketball game last?\ntypically about two hours\n#3 Is between 5 and 10 June 1967 longer than typically about two hours?\nno\nTherefore, the answer to the original question is True"}
{"prompt":"Context: Kami Rita has climbed Mount Everest 24 times. Mount Everest has an elevation of 8,848 m (29,029 ft). Mount Emei has an elevation of 3,099 metres (10,167 ft).\nQuestion: Would it be difficult for Kami Rita to climb Mount Emei?\nTake it step by step:","completion":" #1 What is the highest mountain Kami Rita has climbed?\nMount Everest\n#2 What is the height of Mount Everest?\n8,848 m (29,029 ft),\n#3 What is the height of Mount Emei?\n3,099 metres\n#4 Is 3,099 metres greater or equal to 8,848 m (29,029 ft),?\nno\nTherefore, the answer to the original question is False"}
{"prompt":"Context: Alistair Darling was the chair of the Better Together Campaign. Better Together was the principal campaign for a No vote in the 2014 Scottish independence referendum, advocating Scotland continuing to be part of the United Kingdom. \nQuestion: Is Alistair Darling in favor of Scottish independence?\nTake it step by step:","completion":" #1 What was the main purpose of the Better Together Campaign?\nNo vote in the 2014 Scottish independence referendum\n#2 Was No vote in the 2014 Scottish independence referendum against independence of Scotland?\nIt also represented a range of organisations and individuals who supported a No vote\n#3 Was Alistair Darling the chair of the campaign?\nit was chaired by former UK Chancellor of the Exchequer Alistair Darling\n#4 Is It also represented a range of organisations and individuals who supported a No vote or it was chaired by former UK Chancellor of the Exchequer Alistair Darling negative?\nno\nTherefore, the answer to the original question is False"}
{"prompt":"Context: Maya Angelou was a civil rights activist and author. Maya Angelou had a son named Guy Johnson in 1945. Guy Johnson is an author that has written over twenty books and essays. Guy Johnson's books explore many civil rights themes.\nQuestion: Did any of Maya Angelou's children follow in her footsteps?\nTake it step by step:","completion":" #1 What was Maya angelou's profession?\npoet\n#2 Who is Maya Angelou's son?\nGuy\n#3 Did Guy do poet?\nyes\nTherefore, the answer to the original question is True"}
{"prompt":"Context: The biblical Sarah lived to the age of 127. The biblical Methuselah lived to 969 years of age.\nQuestion: Did Methuselah live at least 800 years as long as Sarah?\nTake it step by step:","completion":" #1 At what age did Methuselah die?\n969\n#2 At what age did Sarah die?\n127\n#3 What is the difference between 969 and 127?\nyes\n#4 Is yes at least 800?\nyes\nTherefore, the answer to the original question is True"}
{"prompt":"Context: Rosemary appears in a few popular song titles such as Love Grows (Where My Rosemary Goes) and Randy Newman's Rosemary. Rose appears in many song titles including: Kiss From a Rose, The Rose, Desert Rose, Beauty of the Rose, and I Never Promised You a Rose Garden.\nQuestion: Is Rosemary outclassed as plant found in most song titles?\nTake it step by step:","completion":" #1 How many songs have \"rosemary\" in the title?\nfive\n#2 How many songs have the plant \"rose\" in the title?\n16\n#3 Is five fewer than 16?\nno\nTherefore, the answer to the original question is True"}
{"prompt":"Context: The Spanish–American War was an armed conflict between Spain and the United States in 1898. Switzerland avoids alliances that might entail military, political, or direct economic action and has been neutral since the end of its expansion in 1515. Its policy of neutrality was internationally recognised at the Congress of Vienna in 1815.\nQuestion: Did Switzerland support the United States in the Spanish–American War?\nTake it step by step:","completion":" #1 What is Switzerland's major policy in terms of foreign relations and international institutions?\narmed neutrality\n#2 Considering armed neutrality, is it likely that Switzerland would have supported the US in the Spanish–American War?\nyes\nTherefore, the answer to the original question is False"}
{"prompt":"Context: The Baby Boomers are the generation born between the years 1946-1964. Bill Gates was born on October 28, 1955 and has a net worth of 108 billion as of 2020. Jeff Bezos was born on January 12, 1964 and has a net worth of 160 billion as of 2020.\nQuestion: Is Bill Gates the wealthiest of the Baby Boomers?\nTake it step by step:","completion":" #1 Which of the present billionaires are baby boomers?\n46 billionaires were under the age of 40\n#2 Who is the wealthiest among 46 billionaires were under the age of 40?\nJeffrey Preston Bezos\n#3 Is Jeffrey Preston Bezos the same as Bill Gates?\nno\nTherefore, the answer to the original question is False"}
{"prompt":"Context: Clorox is a brand name of a line of bleach products. Ammonia and bleach react together to produce toxic gas.\nQuestion: Is it safe to use Ammonia with Clorox?\nTake it step by step:","completion":" #1 What is the main ingredient in Clorox?\nsodium hypochlorite\n#2 What happens when you mix ammonia and sodium hypochlorite together?\nchloramines\n#3 Is chloramines dangerous?\nyes\nTherefore, the answer to the original question is False"}
{"prompt":"Context: Tony Bennett had four children. Tony Bennet has had three wives.\nQuestion: Did Tony Bennett have more children than he had wives?\nTake it step by step:","completion":" #1 How many children has Tony Bennett had?\ntwo\n#2 How many wives has Tony Bennett had?\ntwo\n#3 Is two greater than two?\nyes\nTherefore, the answer to the original question is True"}
{"prompt":"Context: A greyhound bus can travel speeds upward of 60 mph. A greyhound dog can run at speeds up to 45 mph.\nQuestion: Would a greyhound be able to outrun a greyhound bus?\nTake it step by step:","completion":" #1 What is the top speed of a Greyhound bus?\n85 mph\n#2 What is the top speed of a greyhound dog?\n70 kilometres per hour\n#3 Is 70 kilometres per hour greater than 85 mph?\nno\nTherefore, the answer to the original question is False"}
{"prompt":"Context: Bonanza had a total of 431 episodes. WWE Heat had a total of 513 episodes. The average run time of WWE Heat was 45 minutes. The average run time of Bonanza was 49 minutes.\nQuestion: Would Bonanza marathon end before WWE Heat marathon?\nTake it step by step:","completion":" #1 How many episodes exist of Bonanza?\n431\n#2 How many episodes exist of WWE Heat?\n513\n#3 How long is each episode of Bonanza?\n30 Minutes\n#4 How long is each episode of WWE Heat?\none-hour\n#5 Is 431 times 30 Minutes less than 513 times one-hour?\nno\nTherefore, the answer to the original question is False"}
{"prompt":"Context: Futurama was cancelled in 2013. The Simpsons is still creating new episodes as of May 2020. Futurama aired 140 total episodes. The Simpsons has aired over 600 episodes.\nQuestion: Will Futurama surpass the number of episodes of The Simpsons by the end of 2020?\nTake it step by step:","completion":" #1 How many episodes of Futurama have been produced to date?\n140\n#2 How many episodes of the Simpsons has been produced to date?\n683\n#3 Is 140 greater than 683?\nno\nTherefore, the answer to the original question is False"}
{"prompt":"Context: Ariana Grande's song 'Goodnight And Go' uses a sample from a track of the same name. \"Goodnight and Go\" is originally an Imogen Heap song.\nQuestion: Was Ariana Grande inspired by Imogen Heap?\nTake it step by step:","completion":" #1 Who was the original singer of Ariana Grande's cover 'Goodnight and Go'\nImogen Heap\n#2 Is Imogen Heap Imogen Heap?\nno\nTherefore, the answer to the original question is True"}
{"prompt":"Context: The Communist Party of the Soviet Union is a political party A perfect all kill occurs when a South Korean recording artist hits number one simultaneously on every music chart\nQuestion: Can the Communist Party of the Soviet Union get a perfect all kill?\nTake it step by step:","completion":" #1 Who can get a perfect all kill?\nBig Bang\n#2 Is the Communist Party of the Soviet Union a kind of Big Bang?\nno\nTherefore, the answer to the original question is False"}
{"prompt":"Context: George Bush grew up primarily in Texas. English is the primary language spoken in Texas. Cantonese is the primary language spoken in certain parts of China.\nQuestion: Did George W. Bush grow up speaking Cantonese?\nTake it step by step:","completion":" #1 Where did George Bush spend the first few years of his life?\nGeorge W. Bush Childhood Home\n#2 Which language is primarily spoken in George W. Bush Childhood Home?\nEnglish\n#3 Is English the same as Cantonese?\nno\nTherefore, the answer to the original question is False"}
{"prompt":"Context: Kindergartners are usually between 4 and 6 years of age. Kindergartners are tasked with learning the alphabet and how to write their own names.\nQuestion: Would a thesis paper be unusual to assign to kindergartners? \nTake it step by step:","completion":" #1 What skill set is required to create a thesis paper?\nresearch and findings\n#2 What skill set do kindergartners possess?\nnavigation\n#3 Are all the skills in research and findings also found in navigation?\nno\nTherefore, the answer to the original question is True"}
{"prompt":"Context: Henry Ford is the founder of Ford Motor Company. Every Ford vehicle still bears Henry's last name on the brand logo.\nQuestion: Do people still see Henry Ford's last name often?\nTake it step by step:","completion":" #1 What company did Henry Ford create?\nFord Motor Company\n#2 What does Ford Motor Company produce? \nautomobiles and commercial vehicles\n#3 Does automobiles and commercial vehicles have Henry's name on it?\nno\nTherefore, the answer to the original question is True"}
{"prompt":"Context: Harvey Milk was a human being. Cows are not human beings. Only human beings can produce offspring which are also human beings.\nQuestion: Could a cow produce Harvey Milk?\nTake it step by step:","completion":" #1 What products can be derived from cows?\ndung, which can be used to create manure or fuel\n#2 Is Harvey Milk a kind of any of dung, which can be used to create manure or fuel?\nyes\nTherefore, the answer to the original question is False"}
{"prompt":"Context: Happy hardcore is a music genre of hard dance. Happy hardcore emerged both from the UK breakbeat hardcore rave scene, and Belgian, German and Dutch hardcore techno scenes. A funeral is traditionally a somber event. Funerals typically do not involve dancing. Raves are typically energetic and upbeat places and are not somber like a funeral.\nQuestion: Is it unusual to play Happy hardcore music at a funeral?\nTake it step by step:","completion":" #1 What type of music is usually played at funerals?\nfuneral march\n#2 What are the characteristics of Happy Hardcore music?\npiano rolls and uplifting vocals\n#3 Do any of funeral march have the characteristics of piano rolls and uplifting vocals?\nyes\nTherefore, the answer to the original question is True"}
{"prompt":"Context: The Communist Party of the Soviet Union believed in the main aspects of Communism. Communism believes that no private ownership of property should be allowed.  Trickle Down Economics, popularized by Ronald Reagan, involved rich businesses getting tax breaks so they could supposedly pass the wealth to the poor. Trickle Down Economics required rich business owners to have control over the means of production and property.\nQuestion: Would Communist Party of the Soviet Union hypothetically support Trickle Down Economics?\nTake it step by step:","completion":" #1 Under Leninism, which class led the Communist Party of the Soviet Union?\nproletariat\n#2 Under Trickle-down economics, which economic class gains wealth and power?\nhigher earners\n#3 Are proletariat and higher earners the same?\nno\nTherefore, the answer to the original question is False"}
{"prompt":"Context: A white belt is the lowest ranking in Brazilian jiu-jitsu. Jon Jones has a purple belt in Brazilian jiu-jitsu under Roberto Alencar. A purple belt is the second highest ranking in Brazilian jiu-jitsu. Jon Jones is one of the greatest combat sports athletes to ever live.\nQuestion: Could a white belt defeat Jon Jones in a Brazilian jiu-jitsu match?\nTake it step by step:","completion":" #1 What color belt does Jon Jones have in Brazilian jiu-jitsu?\n.\n#2 In belt color ranking in Brazilian jiu-jitsu, where is .? \nwhite through purple belt\n#3 In belt color ranking in Brazilian jiu-jitsu, where is white belt?\nbeginning rank\n#4 Is white through purple belt higher than beginning rank?\nno\nTherefore, the answer to the original question is False"}
{"prompt":"Context: The bull shark has the highest weight for weight bite of all cartilaginous fish at 5,914 newtons. Crocodile slam their jaws shut with 3,700 pounds per square inch (psi), or 16,460 newtons, of bite force.\nQuestion: Does bull shark bite hurt worse than crocodile bite?\nTake it step by step:","completion":" #1 What is the weight bite of a bull shark?\n5,914 newtons\n#2 What is the weight bite of a Crocodile?\n5,000 lbf\n#3 Is 5,914 newtons less than 5,000 lbf?\nno\nTherefore, the answer to the original question is False"}
{"prompt":"Context: The 1936 Summer Olympics was held at the Olympiastadion Berlin. The Olympiastadion Berlin has a capacity of over 74,000 people. The 2020 Superbowl was attended by 62,417 fans.\nQuestion: Is 1936 Summer Olympics venue too small for a Superbowl crowd?\nTake it step by step:","completion":" #1 At which venue did the 1936 Summer Olympics take place?\nOlympiastadion\n#2 What is the spectator capacity of Olympiastadion?\n100,000-seat\n#3 How many people attended the 2020 Superbowl?\n62,417\n#4 Is 62,417 greater than 100,000-seat?\nyes\nTherefore, the answer to the original question is False"}
{"prompt":"Context: Dr. Seuss was a writer and illustrator of children's books Dr. Seuss first published a children's book under the name of Dr. Seuss in 1937 Dr. Seuss did not actually have a doctorate or equivalent degree until 1956\nQuestion: Was Dr. Seuss a liar?\nTake it step by step:","completion":" #1 When did Dr. Seuss first use the title \"Dr.\"?\nas an undergraduate at Dartmouth College\n#2 When did he get his doctorate (or equivalent)?\nLincoln College, Oxford\n#3 Is as an undergraduate at Dartmouth College before Lincoln College, Oxford?\nno\nTherefore, the answer to the original question is True"}
{"prompt":"Context: Between 1492 and 1503, Columbus completed four round-trip voyages between Spain and the Americas.  His expeditions, sponsored by the Catholic Monarchs of Spain, were the first European contact with the Caribbean, Central America, and South America. Antarctica is Earth's southernmost continent.\nQuestion: Did Christopher Columbus go to Antarctica? \nTake it step by step:","completion":" #1 Which areas did Christopher Columbus visit in his voyages?\nthe Caribbean, Central America, and South America\n#2 Is Antarctica one of the Caribbean, Central America, and South America?\nno\nTherefore, the answer to the original question is False"}
{"prompt":"Context: Tendonitis is a condition where the joints are inflamed. Strong motions in joints suffering from tendonitis can result in damage to nerves. Breakdancing is a style of dance that involves many vigorous motions. The downrock breakdancing maneuver involves balancing the body weight on the floor using one arm.\nQuestion: Is breakdancing safe for people with tendonitis?\nTake it step by step:","completion":" #1 What are the symptoms of tendonitis?\npain, swelling, and impaired function\n#2 Which kind of movements are involved in breakdancing?\ntoprock, downrock, power moves and freezes\n#3 Are toprock, downrock, power moves and freezes safe when experiencing pain, swelling, and impaired function?\nyes\nTherefore, the answer to the original question is False"}
{"prompt":"Context: The Pyramid at the Louvre is made of glass and metal. The Louvre Pyramid glass is 10mm thick. 10mm thick glass is not unbreakable.\nQuestion: Is the Louvre's pyramid known for being unbreakable? \nTake it step by step:","completion":" #1 What materials is the Louvre made of?\nglass and metal\n#2 Are all the materials in listed in glass and metal unbreakable?\nno\nTherefore, the answer to the original question is False"}
{"prompt":"Context: Naruto is a character in a Japanese anime and manga about ninjas The Temple of Doom is a setting from an Indiana Jones movie\nQuestion: Did Naruto escape the Temple of Doom?\nTake it step by step:","completion":" #1 Which country was the movie Indiana Jones and the Temple of Doom set in?\nIndia\n#2 What is the setting of manga that features Naruto?\nKonoha\n#3 Are India and Konoha the same?\nno\nTherefore, the answer to the original question is False"}
{"prompt":"Context: August is a summer month in the northern hemisphere. However, the seasons are opposite south of the Equator. August is in the middle of winter for Australia, Antarctica, and parts of Africa and South America.\nQuestion: Is August a winter month for part of the world?\nTake it step by step:","completion":" #1 What season is August a part of in the northern hemisphere?\nFebruary\n#2 Does February correspond to winter south of the Equator?\nyes\nTherefore, the answer to the original question is True"}
{"prompt":"Context: Saddam Hussein, President of Iraq, was a Sunni Muslim that brutalized many Shiite Muslims. Saladin was the first Sultan of Egypt and was a Sunni Muslim. Idris I was called the founder of Morocco and was a Shiite Muslim.\nQuestion: Would Saddam Hussein hypothetically choose Saladin as ally over Idris I?\nTake it step by step:","completion":" #1 Which denomination of Islam did Saddam Hussein identify with?\nSunni\n#2 Which Islamic denomination did Saladin belong to?\nSunni\n#3 Which Islamic denomination did Idris I belong to?\nZaydi\n#4 Does Sunni match Sunni and contrast with Zaydi?\nyes\nTherefore, the answer to the original question is True"}
{"prompt":"Context: Apollo is a Greek god of light. Baldur is a Norse god of light. They are both interested in light.\nQuestion: Do Apollo and Baldur share similar interests?\nTake it step by step:","completion":" #1 Apollo is the Greek god of what object?\narchery\n#2 What is Baldur the Norse god of?\nthe son of Woden\n#3 Is the item in the son of Woden the same as archery?\nno\nTherefore, the answer to the original question is True"}
{"prompt":"Context: Felines include cats, tigers, and lions. The Sacramento River Cats are a minor league baseball affiliate of the San Francisco Giants. The Tri-City Valley Cats are a minor league baseball affiliate of the Houston Astros. The Lakeland Flying Tigers are a minor league baseball affiliate of the Detroit Tigers.\nQuestion: Are any minor league baseball teams named after felines?\nTake it step by step:","completion":" #1 What are the names of teams in Minor League Baseball?\nSacramento River Cats\n#2 Which animals are regarded as felines?\nsmall cats\n#3 Does any of Sacramento River Cats include any of small cats?\nno\nTherefore, the answer to the original question is True"}
{"prompt":"Context: Art Deco is a visual style that first appeared in the 1920s. Andy Warhol was born in 1928. Andy Warhol started drawing when he was in third grade.\nQuestion: Did Andy Warhol influence Art Deco style?\nTake it step by step:","completion":" #1 When did Art Deco first appear as a visual style?\njust before World War I\n#2 When was Andy Warhol born?\nAugust 6, 1928\n#3 Is August 6, 1928 before just before World War I?\nno\nTherefore, the answer to the original question is False"}
{"prompt":"Context: Dante Alighieri was an Italian poet that wrote Inferno. Inferno depicts several layers of Hell. The 8th Circle of Hell is reserved for liars, bribers, flatterers, and false prophets. Rupert Murdoch was involved in a News International scandal in which police were bribed and phones were hacked. Rupert Murdoch refused to take any responsibility for the actions of his employees in the News International scandal.\nQuestion: Would Dante Alighieri hypothetically place Rupert Murdoch in 8th Circle of Hell?\nTake it step by step:","completion":" #1 Which of Dante Alighieri's works describes hell?\nInferno\n#2 According to Inferno, which sins would cause one to be placed in the 8th circle of hell?\nFraudulent and Malicious\n#3 Has Rupert Murdoch come under allegations of any of Fraudulent and Malicious?\nyes\nTherefore, the answer to the original question is True"}
{"prompt":"Context: Giant squids live between 1,000 and 3,800 feet in the ocean. With a dry dive suit, a scuba tank, gloves, and so on, divers can reach depths of around 1000 feet. Without scuba gear people can safely dive a maximum of 60 feet without feeling the negative risks associated with diving beyond the limit.\nQuestion: Is capturing giant squid in natural habitat impossible with no gear?\nTake it step by step:","completion":" #1 At what depths do giant squid live?\n300–1,000 metres (980–3,280 ft).\n#2 What is the max depth a person can safely dive without gear?\n72 metres\n#3 Is 72 metres less than 300–1,000 metres (980–3,280 ft).?\nno\nTherefore, the answer to the original question is True"}
{"prompt":"Context: Pagans are defined as people that hold beliefs other than those of the major world religions (Christianity, Islam, and Judaism). The characters in Harry Potter and the Philosopher's Stone practice magic. Islam explicitly forbid the practice of magic and has harsh consequences for it. Jezebel in Hebrew scripture was a worshiper of pagan Baal and was thrown from a window for her beliefs. Women accused of being witches were burned alive by Christians during the Salem Witch Trials.\nQuestion: Would characters in Harry Potter and the Philosopher's Stone be persecuted as pagans?\nTake it step by step:","completion":" #1 What are the characters in Harry Potter and the Philosopher's Stone known to perform?\nfantasy\n#2 What would performers of fantasy be considered by Christians?\nmagic\n#3 What have Christians done to magic in the past?\nProsecutions\n#4 Are magic pagans and Prosecutions a form of persecution?\nyes\nTherefore, the answer to the original question is True"}
{"prompt":"Context: Donny Hathaway was a singer and session musician that worked with Staple Singers, Jerry Butler, Aretha Franklin, the Impressions  and Curtis Mayfield. Donny Hathaway jumped from his 15th floor room and his death was ruled a suicide.\nQuestion: Has Aretha Franklin ever collaborated with a suicidal person?\nTake it step by step:","completion":" #1 What music artists has Aretha Franklin done collaborations with?\nthe Impressions\n#2 Did any of the artists listed in the Impressions commit suicide?\nyes\nTherefore, the answer to the original question is True"}
{"prompt":"Context: The Paramount leader is the highest leader of China Titanic was produced by Paramount Pictures Paramount Pictures is an American film studio\nQuestion: Did the Paramount leader produce Titanic?\nTake it step by step:","completion":" #1 Who is the Paramount leader?\nJames N. Gianopulos\n#2 Who produced Titanic?\nJames Cameron\n#3 Is James N. Gianopulos the same as James Cameron?\nno\nTherefore, the answer to the original question is False"}
{"prompt":"Context: Seraphim are celestial of heavenly beings. Christians refer to Seraphims as the highest choir of the angelic hierarchy and caretakers of God's throne. Muslims refer to Seraphim as beings created from celestial fire that are part of an exalted assembly.\nQuestion: Do Muslims have a different idea of Seraphim than Christians?\nTake it step by step:","completion":" #1 How is the Seraphim regarded in Christianity?\nhighest rank\n#2 How is the Seraphim regarded in Islam?\nmore excellent than Adam\n#3 Does highest rank clearly contrast with more excellent than Adam?\nno\nTherefore, the answer to the original question is False"}
{"prompt":"Context: Julia Roberts played the clarinet in her school band. Blast beats are a drum beat that originated in hardcore punk and grindcore, and is often associated with certain styles of extreme metal, namely black metal and death metal.\nQuestion: Did Julia Roberts practice blast beats as a child?\nTake it step by step:","completion":" #1 What instrument did Julia Roberts play as a child?\nclarinet\n#2 What instrument does Blast Beats simulate?\nkick drum and the snare drum\n#3 Is clarinet the same as kick drum and the snare drum?\nno\nTherefore, the answer to the original question is False"}
{"prompt":"Context: Pork products are haram, or forbidden in Islam. The McRib is a pork-based sandwich.\nQuestion: Can a Muslim eat a McRib sandwich?\nTake it step by step:","completion":" #1 What foods are Muslims forbidden to eat?\npork products, blood, carrion, and alcohol\n#2 What is a McRib made of?\npork shoulder meat\n#3 Are pork products, blood, carrion, and alcohol and pork shoulder meat different from each other?\nyes\nTherefore, the answer to the original question is False"}
{"prompt":"Context: Many people do not notice depression in their friends or loved ones.  \"Masking\" is a phrase used to describe concealing the effects of one's personality, including mental disorder.\nQuestion: Are there mental disorders you can hide?\nTake it step by step:","completion":" #1 Do any mental disorders have symptoms\/effects that can be hidden?\nyes\nTherefore, the answer to the original question is True"}
{"prompt":"Context: Hades alone can allow passage out of the Underworld. Hades created a terribly difficult task for Orpheus to complete to bring Eurydice from the Underworld.  The subjects of Hades in the Underworld are under his complete control.\nQuestion: Does Hades have a loose grip on the Underworld?\nTake it step by step:","completion":" #1 In whose power is it solely within to allow passage out of the underworld?\nHermes\n#2 Whose rule are the subjects in the Underworld under?\nHades\n#3 Is Hermes or Hades not Hades?\nno\nTherefore, the answer to the original question is False"}
{"prompt":"Context: Pogs came out in the 1990's. The 90's saw a rise in 'Big Wave Culture', a practice involving finding the largest possible waves to surf on.\nQuestion: Was Surfing popular when pogs came out?\nTake it step by step:","completion":" #1 When were Pogs released?\nearly-mid 1990s\n#2 Did surfing experience a growth in popularity in early-mid 1990s?\nyes\nTherefore, the answer to the original question is True"}
{"prompt":"Context: A fortnight refers to a period of two weeks. Centurylink's max internet plan speed is 1,000MB per second. 1000GB takes 2.5 hours to upload for every 1000MB speed.\nQuestion: Can Centurylink max internet plan upload 1000GB in a fortnight?\nTake it step by step:","completion":" #1 How long is a fortnight?\n14 days or alternatively half of a month\n#2 What is Centurylink's max internet plan speed?\n1,000 Mbit\/s download and 1,000 Mbit\/s upload\n#3 With 1,000 Mbit\/s download and 1,000 Mbit\/s upload, how long would it take to upload 1000GB?\nCalix Optical Network Terminals\n#4 Is Calix Optical Network Terminals less than 14 days or alternatively half of a month?\nyes\nTherefore, the answer to the original question is True"}
{"prompt":"Context: According to The Quran, Solomon was one of 25 prophets. According to some Islamic hadiths, there have been as many as 124,000 prophets. Solomon was one of 20 Kings of Judah.\nQuestion: Did Solomon make up bigger percentage of Islamic prophets than Kings of Judah?\nTake it step by step:","completion":" #1 According to the Quran, how many prophets were there?\n124,000\n#2 How many Kings of Judah were there?\n165\n#3 What is 1 divided by 124,000?\nyes\n#4 What is 1 divided by 165?\nyes\n#5 Is yes greater than yes?\nyes\nTherefore, the answer to the original question is False"}
{"prompt":"Context: Astana Arena is a 30,000 seat football stadium in Kazakhstan. Billy Joel, who has performed concerts all over the world, has never been to Kazakhstan.\nQuestion: Has Billy Joel sold out Astana Arena?\nTake it step by step:","completion":" #1 Which country is the Astana Arena located in?\nKazakhstan\n#2 Has Billy Joel ever been to Kazakhstan?\nno\nTherefore, the answer to the original question is False"}
{"prompt":"Context: Most star rating systems are composed of 5 stars. In star rating, most people want to avoid a 1 star review.\nQuestion: In star rating systems, is 5 stars considered good?\nTake it step by step:","completion":" #1 What is the highest rating possible in most star rating systems?\nthree stars\n#2 Is three stars equal to five stars?\nno\nTherefore, the answer to the original question is True"}
{"prompt":"Context: Geometry is the study of size, shape and distance of objects. Determining location requires geometry. Siri can determine your location.\nQuestion: Does Siri know geometry?\nTake it step by step:","completion":" #1 What are some basic user information that Siri can determine?\nsearches, and preferences\n#2 What mathematical concepts must be known in order to determine the location of a point?\nalgebra or nested sets\n#3 Is location included in searches, and preferences and geometry in algebra or nested sets?\nyes\nTherefore, the answer to the original question is True"}
{"prompt":"Context: Coca is a plant originating in South America and used as a cash crop. Yakutsk is a city in east Siberia. The Coca plant grows in a humid tropical climate. Siberia has an extremely cold subarctic climate.\nQuestion: Is a Coca plant farm likely to be found in Yakutsk?\nTake it step by step:","completion":" #1 What kind of climate does the Coca plant grow in?\nlower altitudes of the eastern slopes of the Andes (the Yungas), or the highlands\n#2 What country is Yakutsk located on?\nRussia\n#3 What is the climate of Russia?\nsubarctic\n#4 Is lower altitudes of the eastern slopes of the Andes (the Yungas), or the highlands the same as subarctic?\nno\nTherefore, the answer to the original question is False"}
{"prompt":"Context: Butter is a dairy product made from milk. Cows are the predominant source of milk in the US. Goats, sheep, buffalo, and other mammals produce milk. Goat butter, made from 100% Goat's Milk, is an excellent source of Vitamin A.\nQuestion: Does butter industry survive cow extinction?\nTake it step by step:","completion":" #1 What animal product is butter made from?\ncow's milk\n#2 What common livestock animals produce cow's milk?\nwater buffalo, goat, sheep, camel, donkey, horse, reindeer and yak\n#3 Are animals other than cows included in water buffalo, goat, sheep, camel, donkey, horse, reindeer and yak?\nyes\nTherefore, the answer to the original question is True"}
{"prompt":"Context: Most Chromebook apps require internet access to function properly. There are apps for the Chromebook that can function properly without internet access. To download any apps onto the Chromebook, including offline apps, one must connect to the internet.\nQuestion: Is an internet connection essential for someone using Chrome OS?\nTake it step by step:","completion":" #1 What are the applications needed for essential functions on devices running Chrome OS?\nweb\n#2 Is an internet connection needed for any of web to be downloaded or to work properly?\nyes\nTherefore, the answer to the original question is True"}
{"prompt":"Context: USB flash drives first appeared on the market in late 2000. The Godfather was released in 1972.\nQuestion: Was a USB flash drive used in The Godfather?\nTake it step by step:","completion":" #1 When did USB flash drives become available?\nlate 2000\n#2 When was The Godfather released?\n1972\n#3 What time-span was setting of The Godfather based on?\n1945 to 1955\n#4 Is late 2000 before or within 1972 or 1945 to 1955?\nyes\nTherefore, the answer to the original question is False"}
{"prompt":"Context: Goofy is a popular Disney cartoon character that is a dog. Nylabone is a popular dog bone brand. Dogs chew bones for the taste, and to exercise the muscles of the jaw.\nQuestion: Would Goofy hypothetically enjoy Nylabone?\nTake it step by step:","completion":" #1 What kind of animal does Goofy portray?\nfunny\n#2 What kind of animal are Nylabones made for?\nmanufactured bones\n#3 Are funny and manufactured bones both dog?\nyes\nTherefore, the answer to the original question is True"}
{"prompt":"Context: Software engineers require computers to do their work. Computers do not work without electricity. A power outage is the temporary lack of electrical power.\nQuestion: Can a software engineer work during a power outage?\nTake it step by step:","completion":" #1 What is the main equipment software engineers need to do their job?\ncomputer software\n#2 What is a power outage?\nthe loss of the electrical power network supply to an end user\n#3 Can computer software work without the loss of the electrical power network supply to an end user?\nyes\nTherefore, the answer to the original question is False"}
{"prompt":"Context: The pyramids were built by an estimated 30,000 workers. The Roman Gallic war army had around 75,000 soldiers.\nQuestion: Would Roman Gallic Wars army struggle to build the pyramids faster?\nTake it step by step:","completion":" #1 How many people worked on the pyramids?\n10,000\n#2 How many soldiers were in the Roman Gallic war army?\n3,500\n#3 Is 10,000 greater than or equal to 3,500?\nyes\nTherefore, the answer to the original question is False"}
{"prompt":"Context: Telescopes are used to view things far away. Telescopes are an optical instrument. \nQuestion: Can telescopes hear noise?\nTake it step by step:","completion":" #1 What are the uses of a telescope?\nterrestrial applications and astronomy\n#2 Does terrestrial applications and astronomy include detecting noise?\nyes\nTherefore, the answer to the original question is False"}
{"prompt":"Context: Big Ben is currently under a four year renovation project. The bells have been silenced for the duration of the work due to safety. They are only rung on certain holidays, until the construction finishes in 2021.\nQuestion: Are Big Ben's bells currently rung on their normal schedule at the Palace of Westminster?\nTake it step by step:","completion":" #1 What is the status of Big Ben right now?\na four-year schedule of renovation works began on the tower\n#2 When will a four-year schedule of renovation works began on the tower be completed?\n2021\n#3 Until 2021, is it safe for the bells to ring at Big Ben?\nyes\nTherefore, the answer to the original question is False"}
{"prompt":"Context: The hero of the Hobbit is Bilbo Baggins. Bilbo Baggins is a hobbit, which is a race resembling very short humans with furry feet. Halfling is another term for hobbits, and halflings are described as being half the size of a human. The Drow are a race of dark elves described as being around five feet in height.\nQuestion: Would a Drow tower over The Hobbit's hero?\nTake it step by step:","completion":" #1 Who is the hero of The Hobbit\nBilbo Baggins\n#2 What is a Drow?\ndark elvenfolk\n#3 Is dark elvenfolk taller than Bilbo Baggins?\nno\nTherefore, the answer to the original question is True"}
{"prompt":"Context: During normal years, February has exactly 28 days, so March begins on the same day of the week as February. However, on leap years, February has an extra day, so March begins the next day of the week from whichever day started February.\nQuestion: Does March begin on the same day of the week as February during leap years?\nTake it step by step:","completion":" #1 How many days are in February in a non-leap year?\n28\n#2 How many days are in February in a leap year?\n29\n#3 Does 28 mean that March will begin on the same day as February?\nNo month corresponds to October. All years September and December. No month corresponds to May or June. In the months table below, corresponding months have the same number\n#4 Given that No month corresponds to October. All years September and December. No month corresponds to May or June. In the months table below, corresponding months have the same number is positive, will 29 make no difference to this outcome?\nyes\nTherefore, the answer to the original question is False"}
{"prompt":"Context: The first letter row of the QWERTY keyboard contains: QWERTYUIOP A palindrome is a word that can be spelled the same backwords and forwards such as racecar and rotor.\nQuestion: Can first letter row of QWERTY keyboard spell a palindrome?\nTake it step by step:","completion":" #1 What letters are on the first line of a QWERTY keyboard?\nQ W E R T Y\n#2 What vowels are listed in #!?\nyes\n#3 What consonants are listed in Q W E R T Y?\nyes\n#4 Could a word be formed by repeating the following process: Pick a consonant from yes then select a vowel from yes. Construct a string of letters from those 2 elements such that the first and third letters are the selected consonant and the second is the vowel.\n\n#5 If  is \"no\" then using the process in Step 4 insert a second occurrence of the same vowel adjacent to the first then choose a consonant from yes and insert it between the repeated vowel. Is a word formed?\nno\nTherefore, the answer to the original question is True"}
{"prompt":"Context: The 2020 British royal family includes Queen Elizabeth II and her children. Prince Andrew is the son of Queen Elizabeth II. Prince Andrew was accused of sexual abuse in 2019. Sexual assault is classified as a felony.\nQuestion: Have any members of the 2020 British royal family allegedly committed a felony?\nTake it step by step:","completion":" #1 Which royal family does Prince Andrew belong to?\nBritish\n#2 What is Prince Andrew accused of?\nsexual abuse\n#3 What type of crime is sexual abuse?\nRape\/sexual assault\n#4 Does British have a member accused of Rape\/sexual assault?\nno\nTherefore, the answer to the original question is True"}
[truncated: 831,525 more chars]
