# Supplementary material
Source: ML conference proceedings conference paper supplement (https://aclanthology.org/2023.findings-eacl.31)
Supplement: dataset [file 2023.findings-eacl.31.dataset.zip › causal_reasoning_of_entities_and_events/strategyqa/finetune/gpt3_ft_prepared.jsonl]

{"prompt":"Question: Are more people today related to Genghis Khan than Julius Caesar?\nTake it step by step:","completion":" #1 How many kids did Julius Caesar have?\ntwo\n#2 How many kids did Genghis Khan have?\nfourth\n#3 Is fourth greater than two?\nno\nTherefore, the answer to the original question is True"}
{"prompt":"Question: Could the members of The Police perform lawful arrests?\nTake it step by step:","completion":" #1 Who can perform lawful arrests?\nlaw enforcement agents\n#2 Are members of The Police also law enforcement agents?\nno\nTherefore, the answer to the original question is False"}
{"prompt":"Question: Would a Monoamine Oxidase candy bar cheer up a depressed friend?\nTake it step by step:","completion":" #1 Depression is caused by low levels of what chemicals?\nmagnesium, vitamin D, and tryptophan\n#2 Monoamine Oxidase has an effect on what chemicals?\ndopamine, tyramine, and tryptamine\n#3 Of the chemicals listed in both magnesium, vitamin D, and tryptophan and dopamine, tyramine, and tryptamine, does Monoamine Oxidase raise their levels?\nyes\nTherefore, the answer to the original question is False"}
{"prompt":"Question: Would a dog respond to bell before Grey seal?\nTake it step by step:","completion":" #1 How sensitive is a grey seal's hearing on land?\nearless seals\n#2 How sensitive is a dog's hearing on land?\nacute\n#3 Is acute better than earless seals?\nno\nTherefore, the answer to the original question is True"}
{"prompt":"Question: Is a pound sterling valuable?\nTake it step by step:","completion":" #1 What is the value of the Pound Sterling based on?\nits continued acceptance in the national and international economy\n#2 Is its continued acceptance in the national and international economy the material used in making it?\nno\nTherefore, the answer to the original question is False"}
{"prompt":"Question: Is shrimp scampi definitely free of plastic?\nTake it step by step:","completion":" #1 What protein is Shrimp scampi made out of?\nNephrops norvegicus\n#2 What have Nephrops norvegicus been found to contain?\n9.2%.\n#3 Are 9.2%. free from plastic?\nno\nTherefore, the answer to the original question is False"}
{"prompt":"Question: Do the anchors on Rede Globo speak Chinese?\nTake it step by step:","completion":" #1 What country broadcasts Rede Globo?\nBrazilian\n#2 What is the official language of Brazilian?\nPortuguese\n#3 Is Portuguese Chinese?\nno\nTherefore, the answer to the original question is False"}
{"prompt":"Question: Is a Boeing 737 cost covered by Wonder Woman (2017 film) box office receipts?\nTake it step by step:","completion":" #1 How much does a Boeing 737 cost?\n$150 million\n#2 How much did the 2017 movie Wonder Woman gross?\nover $821 million worldwide\n#3 Is over $821 million worldwide greater than $150 million?\nno\nTherefore, the answer to the original question is True"}
{"prompt":"Question: Can you buy Casio products at Petco?\nTake it step by step:","completion":" #1 What kind of products does Casio manufacture?\ncalculators, mobile phones, digital cameras, electronic musical instruments, and analogue and digital watches\n#2 What kind of products does Petco sell?\nfish, reptiles, small birds, hamsters, guinea pigs, and mice\n#3 Does calculators, mobile phones, digital cameras, electronic musical instruments, and analogue and digital watches overlap with fish, reptiles, small birds, hamsters, guinea pigs, and mice?\nyes\nTherefore, the answer to the original question is False"}
{"prompt":"Question: Did the Space Race use relay batons?\nTake it step by step:","completion":" #1 What was the Space Race?\na 20th-century competition between two Cold War rivals\n#2 What are relay batons used for?\nice skating\n#3 Is a 20th-century competition between two Cold War rivals the same as ice skating?\nyes\nTherefore, the answer to the original question is False"}
{"prompt":"Question: Are Christmas trees dissimilar to deciduous trees?\nTake it step by step:","completion":" #1 Which kind of trees are commonly used as Christmas trees?\nevergreen conifer\n#2 Are evergreen conifer dissimilar to deciduous trees?\nyes\nTherefore, the answer to the original question is True"}
{"prompt":"Question: Does Biochemistry study gluons?\nTake it step by step:","completion":" #1 What are gluons?\nan elementary particle\n#2 What things are studied in biochemistry?\nproteins, nucleic acids, carbohydrates, and lipids\n#3 Is an elementary particle included in proteins, nucleic acids, carbohydrates, and lipids?\nno\nTherefore, the answer to the original question is False"}
{"prompt":"Question: Did land owners elect their rulers in the Kingdom of Hungary?\nTake it step by step:","completion":" #1 Which kind of government ruled over the Kingdom of Hungary?\nmonarchy\n#2 Does monarchy allow citizens to elect their own rulers?\nno\nTherefore, the answer to the original question is False"}
{"prompt":"Question: Would Nancy Pelosi publicly denounce abortion?\nTake it step by step:","completion":" #1 Which US political party does Nancy Pelosi identify with?\nDemocrat\n#2 Do most people who identify with Democrat oppose abortion?\nno\nTherefore, the answer to the original question is False"}
{"prompt":"Question: Does Dragon Ball shows and movies fall short of Friday 13th number of projects?\nTake it step by step:","completion":" #1 How many Dragon Ball series, TV specials and other features have been released?\nthree\n#2 How many Friday the 13th franchise films and television series have been released?\ntwelve\n#3 Is twelve greater than three?\nno\nTherefore, the answer to the original question is True"}
{"prompt":"Question: Would a student of the class of 2017 have amnesia about 9\/11?\nTake it step by step:","completion":" #1 What year did 9\/11 occur?\n2001\n#2 In what year would students graduating high-school in 2017 have been born in?\n17\n#3 What age is childhood amnesia most common in?\nthree or four\n#4 If someone was born in 17, how old would they have been in 2001?\nunder one year of age\n#5 Does three or four overlap with under one year of age?\nno\nTherefore, the answer to the original question is True"}
{"prompt":"Question: Would a psychic who admits to hot reading be trustworthy?\nTake it step by step:","completion":" #1 What do people pretend to be in order to successfully carry out hot reading?\nmagic\n#2 Do the 'real' magic consider hot reading to be genuine?\nyes\nTherefore, the answer to the original question is False"}
{"prompt":"Question: Is average number of peas in a pod enough commas for a billion?\nTake it step by step:","completion":" #1 How many peas are in the average pod?\nseveral\n#2 How many commas are needed for a billion?\n1,000,000,000\n#3 Is several at least equal to 1,000,000,000?\nno\nTherefore, the answer to the original question is True"}
{"prompt":"Question: Does actress Leila George lack the height to be a model?\nTake it step by step:","completion":" #1 How tall is Leila George?\n.\n#2 How tall is Cindy Crawford? \n5 feet 9 inches\n#3 What is the height of model Sara Sampaio?\nSara Pinto Sampaio\n#4 Is . shorter than both 5 feet 9 inches and Sara Pinto Sampaio?\nno\nTherefore, the answer to the original question is False"}
{"prompt":"Question: Is Dustin Hoffman one of the B'nei Yisrael?\nTake it step by step:","completion":" #1 What does B'nei Yisrael refer to?\nchildren of Israel\n#2 What religion was Dustin Hoffman family as he was growing up?\nJewish\n#3 Is Jewish the same as children of Israel?\nno\nTherefore, the answer to the original question is True"}
{"prompt":"Question: If you were on a diet, would you have to skip lunch at McDonald's?\nTake it step by step:","completion":" #1 What is characteristic of food eaten by someone on a diet?\nregulated and supervised fashion\n#2 Are lunch options characterized by regulated and supervised fashion unavailable at McDonald's?\nno\nTherefore, the answer to the original question is False"}
{"prompt":"Question: Could the Powerpuff Girls hypothetically attend the Camden Military Academy?\nTake it step by step:","completion":" #1 What gender are the Powerpuff Girls?\ngirls\n#2 What gender is allowed to attend the Camden Military Academy?\nmale\n#3 Is girls the same as male?\nyes\nTherefore, the answer to the original question is False"}
{"prompt":"Question: Would an uninsured person be more likely than an insured person to decline a CT scan?\nTake it step by step:","completion":" #1 Typically how much does it cost to get a CT scan without insurance?\nUS$600 to $3000\n#2 On average, how much does it cost to get a CT scan with insurance?\nUS$600 to $3000\n#3 Is US$600 to $3000 less than US$600 to $3000?\nno\nTherefore, the answer to the original question is True"}
{"prompt":"Question: Was the Donatello crucifix identified in 2020 life size?\nTake it step by step:","completion":" #1 The crucifix sculpted by Donatello and identified in 2020 is a depiction of what?\nJesus on the cross\n#2 What is the average height of Jesus on the cross?\n.\n#3 What is the average height of a real, living, Jesus on the cross?\n8 feet\n#4 Is . equal to 8 feet?\nno\nTherefore, the answer to the original question is False"}
{"prompt":"Question: Is Disneyland Paris the largest Disney resort?\nTake it step by step:","completion":" #1 How big is Disneyland Paris in square miles?\n20-square-kilometre\n#2 How big is Walt Disney World in square miles?\n39\n#3 Is 20-square-kilometre larger than 39?\nno\nTherefore, the answer to the original question is False"}
{"prompt":"Question: Could someone with fine motor control issues benefit from an altered keyboard layout?\nTake it step by step:","completion":" #1 What types of keyboard layouts exist?\nany one mechanical and functional layout can be employed with a number of different visual layouts\n#2 Among any one mechanical and functional layout can be employed with a number of different visual layouts, which keyboard layouts are optimized for disabilities?\nSebeolsik Noshift\n#3 Are any of Sebeolsik Noshift better for those with limited fine motor control?\nno\nTherefore, the answer to the original question is True"}
{"prompt":"Question: Would Adam Sandler get a reference to Cole Spouse and a scuba man doll?\nTake it step by step:","completion":" #1 What did Adam Sandler and Cole Sprouse star together in?\nBig Daddy\n#2 Was a scuba man doll used as a prop by Cole in Big Daddy?\nno\nTherefore, the answer to the original question is True"}
{"prompt":"Question: Is there a warthog on Broadway?\nTake it step by step:","completion":" #1 Which animals did Disney movie 'Lion King' feature?\nmeerkat and warthog\n#2 Is a warthog included in meerkat and warthog?\nwarthog\n#3 Was Lion King adapted for a Broadway musical?\nthe Broadway production moved to the Minskoff Theatre\n#4 Considering warthog and the Broadway production moved to the Minskoff Theatre, would the warthog appear on Broadway?\nyes\nTherefore, the answer to the original question is True"}
{"prompt":"Question: Does Disney have an ice princess?\nTake it step by step:","completion":" #1 What are some popular Disney characters?\nThe Princesses, along with Anna and Elsa\n#2 Is any of The Princesses, along with Anna and Elsa an ice princess?\nno\nTherefore, the answer to the original question is True"}
{"prompt":"Question: Would a geographer use biochemistry in their work?\nTake it step by step:","completion":" #1 What is the area of study of a geographer?\ngeography\n#2 What is the area of study of Biochemistry\nchemical processes within and relating to living organisms\n#3 Is any of geography in chemical processes within and relating to living organisms?\nyes\nTherefore, the answer to the original question is False"}
{"prompt":"Question: Could George Washington's own speeches have been recorded live to a compact disc?\nTake it step by step:","completion":" #1 When did George Washington die?\nDecember 14, 1799\n#2 When were compact discs introduced?\n1982\n#3 Is December 14, 1799 after 1982?\nno\nTherefore, the answer to the original question is False"}
{"prompt":"Question: Would food made with black salt smell of sulfur?\nTake it step by step:","completion":" #1 What does black salt smell like when cooked?\nsulphurous, pungent\n#2 Does sulphurous, pungent smell similar to sulfur?\nno\nTherefore, the answer to the original question is True"}
{"prompt":"Question: Would a broadcast from Spirit make the news in 2020?\nTake it step by step:","completion":" #1 When did the martian rover 'Spirit' send its last transmission?\nMarch 22, 2010\n#2 Which rover sent another 'final message' in 2019?\nOpportunity\n#3 Is March 22, 2010 before 2020 and did Opportunity make the news?\nyes\nTherefore, the answer to the original question is True"}
{"prompt":"Question: Could Robert Wadlow hypothetically see Frankenstein's monster's bald spot from above?\nTake it step by step:","completion":" #1 How tall is Frankenstein?\n8 feet\n#2 How tall is Robert Wadlow?\n8 ft 11.1 in\n#3 Is 8 ft 11.1 in greater than 8 feet?\nno\nTherefore, the answer to the original question is True"}
{"prompt":"Question: Is the tibia necessary to win the Stanley Cup?\nTake it step by step:","completion":" #1 Which achievement leads to the award of the Stanley Cup?\nplayoff winner\n#2 Which sport does playoff winner involve?\nHockey\n#3 Which body parts are actively involved in playing Hockey\nIce skates\n#4 Which part of the body is the tibia found in?\nbelow the knee\n#5 Is below the knee included in Ice skates?\nno\nTherefore, the answer to the original question is True"}
{"prompt":"Question: Would an ethics professor teach a class on Cezanne?\nTake it step by step:","completion":" #1 What was Cezanne known for?\nPost-Impressionist painter\n#2 What branch of philosophy would deal with Post-Impressionist painter?\nexistentialism\n#3 Is existentialism the same as ethics? \nno\nTherefore, the answer to the original question is False"}
{"prompt":"Question: If you add water to rice pudding is it horchata?\nTake it step by step:","completion":" #1 What ingredients are in horchata?\nrice, sometimes with vanilla and typically with canella or cinnamon\n#2 What ingredients are in rice pudding?\ncinnamon and raisins\n#3 If you add water to cinnamon and raisins, is it the same as rice, sometimes with vanilla and typically with canella or cinnamon?\nno\nTherefore, the answer to the original question is False"}
{"prompt":"Question: If your skin was turning the color of a zombie, could it be because of nickel?\nTake it step by step:","completion":" #1 What color skin are zombies typically depicted with?\nvoodoo zombie\n#2 Does Nickel turn a person's skin voodoo zombie?\nyes\nTherefore, the answer to the original question is True"}
{"prompt":"Question: Would a Dolce & Gabbana suit wearer be shunned by their Amish cousins?\nTake it step by step:","completion":" #1 What type of clothing do the Amish prefer?\nplain\n#2 What happens if an Amish person wears clothes going against plain?\nshunning\n#3 What clothing pieces are Dolce & Gabbana known for?\nluxury fashion\n#4 If Amish cousins wore luxury fashion, would shunning happen to them?\nyes\nTherefore, the answer to the original question is True"}
{"prompt":"Question: Is the Illuminati card game still popular?\nTake it step by step:","completion":" #1 When was the last Illuminati card game published?\n2001\n#2 Was 2001 with the last few years?\nno\nTherefore, the answer to the original question is False"}
{"prompt":"Question: Can a strawberry get worms similar to dogs?\nTake it step by step:","completion":" #1 What types of worms can strawberries become infected with?\nstrawberry root weevils, strawberry thrips\n#2 What types of worms can dogs become infected with?\nroundworms or tapeworms\n#3 Are any of strawberry root weevils, strawberry thrips present in roundworms or tapeworms?\nyes\nTherefore, the answer to the original question is True"}
{"prompt":"Question: Is Menthol associated with Thanksgiving?\nTake it step by step:","completion":" #1 What are some common dishes served during Thanksgiving?\nturkey, potatoes\n#2 Does any of turkey, potatoes contain menthol?\nno\nTherefore, the answer to the original question is False"}
{"prompt":"Question: Would someone in Mumbai refer to Solanum melongena as an eggplant?\nTake it step by step:","completion":" #1 In what country Mumbai located?\nIndia\n#2 In what region is India located?\nSouth Asia\n#3 What is Solanum melongena referred to as in South Asia?\nLinnaean name\n#4 Is Linnaean name the word \"eggplant\"?\nyes\nTherefore, the answer to the original question is False"}
{"prompt":"Question: Is it okay to lie after taking an oath in a court of law?\nTake it step by step:","completion":" #1 When you lie in court, what is that considered?\nPerjury\n#2 Is Perjury legal?\nyes\nTherefore, the answer to the original question is False"}
{"prompt":"Question: Is art prioritized in the US education system?\nTake it step by step:","completion":" #1 When funding is low in schools, what subjects are typically cut first?\narts programs\n#2 What types of classes are arts programs classified as?\nperforming arts\n#3 Is art not classified as performing arts?\nno\nTherefore, the answer to the original question is False"}
{"prompt":"Question: While on a liquid diet, are there some types of soup you cannot eat?\nTake it step by step:","completion":" #1 Are there any soups that contain substantially solid portions?\nyes\nTherefore, the answer to the original question is True"}
{"prompt":"Question: Would it be impossible to use an Iwato scale for a twelve-tone technique composition?\nTake it step by step:","completion":" #1 How many pitch cases are used for the Iwato scale?\nseventh\n#2 Is seventh not equal to the number of pitch cases needed for the twelve-tone technique?\nyes\nTherefore, the answer to the original question is True"}
{"prompt":"Question: Would the Titanic be well preserved at the bottom of the Gulf of Finland?\nTake it step by step:","completion":" #1 Are ships well-preserved in the Gulf of Finland?\nrelatively well preserved\n#2 Was the RMS Titanic a ship?\nthe largest ship afloat\n#3 Is both relatively well preserved and the largest ship afloat \"yes\"\nno\nTherefore, the answer to the original question is True"}
{"prompt":"Question: Could a dandelion suffer from hepatitis?\nTake it step by step:","completion":" #1 Hepatitis is the inflammation of what?\nthe liver tissue\n#2 In which kingdom is the liver tissue found?\nvertebrates\n#3 In what kingdom are dandelions found?\nEurasia\n#4 Is Eurasia the same as vertebrates?\nno\nTherefore, the answer to the original question is False"}
{"prompt":"Question: Would a week be enough time to watch every episode of Ugly Betty?\nTake it step by step:","completion":" #1 How many hours are in a week?\n168\n#2 How long is the entire Ugly Betty series?\nfourth-season\n#3 Is 168 greater than or equal to fourth-season?\nno\nTherefore, the answer to the original question is True"}
{"prompt":"Question: Was the Louisiana Purchase made with bitcoin?\nTake it step by step:","completion":" #1 When was Bitcoin launched?\n2009\n#2 When did the Louisiana Purchase take place?\n1803\n#3 Is 2009 prior to 1803?\nno\nTherefore, the answer to the original question is False"}
{"prompt":"Question: Did Japanese serfdom have higher status than English counterpart?\nTake it step by step:","completion":" #1 How did English lords treat their serfs?\nabused with no rights over their own bodies\n#2 What did the Japanese recognize serfs as?\nvilleins\n#3 Is villeins higher in importance than abused with no rights over their own bodies?\nyes\nTherefore, the answer to the original question is True"}
{"prompt":"Question: Is the best tasting part of the papaya in the center?\nTake it step by step:","completion":" #1 What is usually located in the center of papayas?\nfruit is a large berry\n#2 Is fruit is a large berry usually consumed by people when eating papayas?\nno\nTherefore, the answer to the original question is False"}
{"prompt":"Question: Could Lil Wayne's children ride in a Chevrolet Corvette ZR1 together?\nTake it step by step:","completion":" #1 How many people can a Chevrolet Corvette ZR1 seat at a time?\ntwo\n#2 How many children does Lil Wayne have?\nyes\n#3 Is two greater than or equal to yes?\nno\nTherefore, the answer to the original question is False"}
{"prompt":"Question: Is double duty an incorrect phrase for host of Dancing With The Stars?\nTake it step by step:","completion":" #1 Who is the host of TV series 'Dancing WIth The Stars'?\nTom Bergeron\n#2 Who hosts America's Funniest Home Videos?\nRibeiro\n#3 Do Tom Bergeron and Ribeiro being the same fail to meet the definition of double duty?\nyes\nTherefore, the answer to the original question is False"}
{"prompt":"Question: Could an ocelot subsist on a single bee hummingbird per day?\nTake it step by step:","completion":" #1 How much food does an ocelot need to live per day?\n600–800 g (21–28 oz)\n#2 How much does a bee hummingbird weigh?\n2.6 g (0.092 oz)\n#3 Is 2.6 g (0.092 oz) greater than or equal to 600–800 g (21–28 oz)?\nyes\nTherefore, the answer to the original question is False"}
{"prompt":"Question: Does Ukrainian Greek Catholic Church recognize Alexander Nevsky as a saint?\nTake it step by step:","completion":" #1 In which religion is Alexander Nevsky considered a saint?\nRussian Orthodox Church\n#2 What religion is the Ukrainian Greek Catholic Church a part of?\nByzantine Rite\n#3 Is Russian Orthodox Church and Byzantine Rite the same?\nno\nTherefore, the answer to the original question is False"}
{"prompt":"Question: Was the original James Bond actor born near the Washington Monument?\nTake it step by step:","completion":" #1 Who originally played James Bond?\nSean Connery\n#2 Where was Sean Connery born?\nFountainbridge, Edinburgh, Scotland\n#3 Where is the Washington Monument located?\non the National Mall\n#4 What is the distance between Fountainbridge, Edinburgh, Scotland and on the National Mall?\nPlay\n#5 Is Play a short enough of a distance to be considered \"close\"?\nno\nTherefore, the answer to the original question is False"}
{"prompt":"Question: Did J. P. Morgan have healthy lungs?\nTake it step by step:","completion":" #1 What are the causes of unhealthy lungs?\nsmoking or exposure to harmful substances\n#2 Did J. P. Morgan engage in any part of smoking or exposure to harmful substances?\nno\nTherefore, the answer to the original question is False"}
{"prompt":"Question: Would Firefighters be included in a September 11th memorial?\nTake it step by step:","completion":" #1 Who gets remembered on September 11th?\nthe victims\n#2 Were firefighters among the victims?\nno\nTherefore, the answer to the original question is True"}
{"prompt":"Question: Does Andrew Johnson's presidential number exceed Elagabalus's Emperor number?\nTake it step by step:","completion":" #1 What number president was Andrew Johnson?\n17th\n#2 What number emperor  was Elagabalus?\n218\n#3 Is 17th greater than 218?\nno\nTherefore, the answer to the original question is False"}
{"prompt":"Question: Are any animals in Chinese calendar Chordata?\nTake it step by step:","completion":" #1 What animals are on the Chinese calendar?\ntwelve zodiac animal signs\n#2 Which animals in twelve zodiac animal signs have a notochord and dorsal neural tube?\nchordate\n#3 Which animals in chordate have pharyngeal slits and an endostyle at some stage of development?\nRat\n#4 Which animals in Rat have a post-anal tail?\nchordate\n#5 Is there at least one animal listed in chordate?\nyes\nTherefore, the answer to the original question is True"}
{"prompt":"Question: Would a hypothetical Yeti be towered over by Andre the Giant?\nTake it step by step:","completion":" #1 How tall was Andre the Giant?\nover seven feet tall\n#2 How tall are Yeti thought to be?\ntaller than an average human\n#3 Is taller than an average human greater than over seven feet tall?\nno\nTherefore, the answer to the original question is True"}
{"prompt":"Question: Was The Little Prince's titular character allergic to flowers?\nTake it step by step:","completion":" #1 Who is the titular character of The Little Prince?\nyoung prince\n#2 Does young prince avoid interacting with flowers?\nyes\nTherefore, the answer to the original question is False"}
{"prompt":"Question: Did Millard Fillmore help to establish the University of Pittsburgh?\nTake it step by step:","completion":" #1 When was the University of Pittsburgh established?\n1787\n#2 When was Millard Fillmore born?\nJanuary 7, 1800\n#3 Is January 7, 1800 before 1787?\nno\nTherefore, the answer to the original question is False"}
{"prompt":"Question: Does Northern fur seal make good pet for six year old?\nTake it step by step:","completion":" #1 What environment do Northern fur seals thrive in?\nnorth Pacific\n#2 Do six-years olds have safe access to north Pacific?\nyes\nTherefore, the answer to the original question is False"}
{"prompt":"Question: Would a pear sink in water?\nTake it step by step:","completion":" #1 What is the density of a pear?\nfive 'cartilaginous\n#2 What is the density of water?\n1 gram per cubic centimetre\n#3 Is five 'cartilaginous greater than 1 gram per cubic centimetre?\nno\nTherefore, the answer to the original question is False"}
{"prompt":"Question: WIll Noah's Ark hypothetically sail through flooded Lincoln Tunnel?\nTake it step by step:","completion":" #1 What is the width of the Lincoln tunnel?\n21.5-foot\n#2 What is the width of the Noah's ark?\n50 cubits\n#3 Is 21.5-foot greater than 50 cubits?\nno\nTherefore, the answer to the original question is False"}
{"prompt":"Question: Can you write a whole Haiku in a single tweet?\nTake it step by step:","completion":" #1 How many characters can be expected to be in an average haiku?\n17\n#2 What is the current character limit of a single tweet?\n280\n#3 Is 17 reasonably less than 280?\nno\nTherefore, the answer to the original question is True"}
{"prompt":"Question: Would you take a photo of a Saltwater crocodile in Memphis?\nTake it step by step:","completion":" #1 Where can saltwater crocodiles be found?\nIndia's east coast across Southeast Asia and the Sundaic region to northern Australia and Micronesia\n#2 Is Memphis located in any of India's east coast across Southeast Asia and the Sundaic region to northern Australia and Micronesia?\nno\nTherefore, the answer to the original question is False"}
{"prompt":"Question: Could Scooby Doo fit in a kangaroo pouch?\nTake it step by step:","completion":" #1 What type of creature was Scooby-Doo?\nGreat Dane\n#2 How large are Great Dane?\ngreat size\n#3 What resides in a kangaroo pouch?\nthe neonate\n#4 How large are the neonate?\na few centimetres long\n#5 Is great size approximately equal to a few centimetres long?\nno\nTherefore, the answer to the original question is False"}
{"prompt":"Question: Do manta rays live in water above the safe temperature for cold food storage?\nTake it step by step:","completion":" #1 What temperature should cold food be stored at?\nbelow 0 °F (−18 °C).\n#2 What kind of water do manta rays live in?\nwarm temperate, subtropical and tropical waters\n#3 What is the normal temperature of warm temperate, subtropical and tropical waters?\n68 °F\n#4 Is 68 °F higher than below 0 °F (−18 °C).?\nno\nTherefore, the answer to the original question is True"}
{"prompt":"Question: Is the kayak a traditional boat in New Zealand?\nTake it step by step:","completion":" #1 What cultures invented the kayak?\nInuit, Yup'ik, and Aleut\n#2 What cultures are native to New Zealand?\nMāori\n#3 Is there overlap between Inuit, Yup'ik, and Aleut and Māori?\nno\nTherefore, the answer to the original question is False"}
{"prompt":"Question: Has the Subway restaurant franchise had any connections with child abusers?\nTake it step by step:","completion":" #1 Was Jared Fogle a spokesman for Subway?\nformer spokesperson\n#2 Is Jared Fogle a sexual abuser of children?\nsex with minors\n#3 Are former spokesperson and sex with minors the same?\nno\nTherefore, the answer to the original question is True"}
{"prompt":"Question: Would the high school class of 2010 have lived through the Presidency of Richard Nixon?\nTake it step by step:","completion":" #1 When was Richard Nixon president of the US until?\n1974\n#2 What year range would the high school class of 2010 be born in?\n11\n#3 Is 1974 in 11?\nno\nTherefore, the answer to the original question is False"}
{"prompt":"Question: Would a Deacon be likely to be a fan of the podcast 'God Awful Movies'?\nTake it step by step:","completion":" #1 What is the main topic of God Awful Movies?\nyes no@@YES_NO_SEP@@What is the main topic of God Awful Movies? \n#2 What is God Awful Movies position on yes no@@YES_NO_SEP@@What is the main topic of God Awful Movies? ?\nno\n#3 What are deacon's positions on yes no@@YES_NO_SEP@@What is the main topic of God Awful Movies? ?\nvaries among theological and denominational traditions\n#4 Are no and varies among theological and denominational traditions the same or similar?\nyes\nTherefore, the answer to the original question is False"}
{"prompt":"Question: Could a giant squid fit aboard the deck of the titanic?\nTake it step by step:","completion":" #1 What is the length of a giant squid?\nrarely exceeds 5 m (16 ft).\n#2 What was the length of a deck on the Titanic?\n50 ft\n#3 Is rarely exceeds 5 m (16 ft). less than 50 ft?\nyes\nTherefore, the answer to the original question is True"}
{"prompt":"Question: Is Antarctica a good location for Groundhog Day?\nTake it step by step:","completion":" #1 What does a groundhog have to see in order for a prediction to be made on Groundhog Day?\nits shadow\n#2 Which particular light source is responsible for casting its shadow?\nsunlight\n#3 How is the sunlight pattern like on Antarctica?\n24 hours\n#4 Is 24 hours is irregular?\nno\nTherefore, the answer to the original question is False"}
{"prompt":"Question: Can the Powerpuff Girls form a complete tag team wrestling match?\nTake it step by step:","completion":" #1 What is the minimum number of people that can participate in a tag team match in professional wrestling?\ntwo\n#2 The Powerpuff girls are how many in number?\nfifth\n#3 Is fifth greater than or equal to two?\nyes\nTherefore, the answer to the original question is False"}
{"prompt":"Question: Will someone die without white blood cells?\nTake it step by step:","completion":" #1 What function do white blood cells serve in the body?\nprotecting the body against both infectious disease and foreign invaders\n#2 Can a human live without protecting the body against both infectious disease and foreign invaders?\nno\nTherefore, the answer to the original question is True"}
{"prompt":"Question: Does rock star Keith Richards play a captain of a boat in a movie?\nTake it step by step:","completion":" #1 What role did Keith Richards play in the Pirates of the Caribbean movies?\nCaptain Teague\n#2 Can Captain Teague be considered a captain of a boat?\nyes\nTherefore, the answer to the original question is True"}
{"prompt":"Question: Would an eleventh-grader be eligible for Medicare?\nTake it step by step:","completion":" #1 What ages are people in eleventh grade?\n16–17 years of age\n#2 What ages are most medicare recipients?\n65 and older\n#3 Is there an overlap between 16–17 years of age and 65 and older?\nyes\nTherefore, the answer to the original question is False"}
{"prompt":"Question: Is there a full Neptunian orbit between the first two burials of women in the Panthéon?\nTake it step by step:","completion":" #1 In what year was the first woman buried in the Panthéon?\n1995\n#2 In what year was the second woman buried in the Panthéon?\n2015\n#3 How many years are between 1995 and 2015?\nyes\n#4 How many years does it take for Neptune to orbit the Sun?\n164.8\n#5 Is 164.8 less than or equal to yes?\nno\nTherefore, the answer to the original question is False"}
{"prompt":"Question: Will Oasis cruise boat traverse the Lincoln Tunnel?\nTake it step by step:","completion":" #1 What is the maximum height clearance of the Lincoln Tunnel?\n13 feet\n#2 How tall is the Oasis cruise ship?\n5-deck\n#3 Is 13 feet greater than or equal to 5-deck?\nno\nTherefore, the answer to the original question is False"}
{"prompt":"Question: Could Oscar Wilde have operated a motor vehicle?\nTake it step by step:","completion":" #1 When were cars first used?\n20th century\n#2 When did Oscar Wilde pass away?\n30 November 1900\n#3 Did 30 November 1900 happen after 20th century?\nyes\nTherefore, the answer to the original question is True"}
{"prompt":"Question: Will Tokyo Tower be repainted only once during President Trump's first term?\nTake it step by step:","completion":" #1 How long (in years) is President Trump's first term?\nfour\n#2 How often (interval in years) is the Tokyo Tower repainted?\nEvery five years\n#3 Is Every five years divided by four less than two?\nno\nTherefore, the answer to the original question is True"}
{"prompt":"Question: Has a neanderthal ever served on the Supreme Court of the United States?\nTake it step by step:","completion":" #1 How long ago did Neanderthals live?\n40,000 years ago\n#2 How long ago was the Supreme Court of the United States formed?\n1789\n#3 Is 1789 greater than 40,000 years ago?\nno\nTherefore, the answer to the original question is False"}
{"prompt":"Question: Can Clouded leopards chase down many Pronghorn antelopes?\nTake it step by step:","completion":" #1 What is the top speed for a Clouded leopard ?\n58 kilometres per hour (36 mph).\n#2 What is the top speed for a Pronghorn antelope ?\nit can run 35 mph for 4 mi (56 km\/h for 6 km),\n#3 Is 58 kilometres per hour (36 mph). greater then or equal to it can run 35 mph for 4 mi (56 km\/h for 6 km),?\nno\nTherefore, the answer to the original question is False"}
{"prompt":"Question: Does the anatomy of a camel lend itself to jokes on Wednesdays?\nTake it step by step:","completion":" #1 As a joke, what is Wednesday otherwise known as?\nhump day\n#2 What are camels known for having?\nfood (milk and meat) and textiles (fiber and felt from hair).\n#3 Is there overlap between hump day and food (milk and meat) and textiles (fiber and felt from hair).?\nyes\nTherefore, the answer to the original question is True"}
{"prompt":"Question: Can voice actors for Goofy and Bugs Bunny each get one stripe from American flag?\nTake it step by step:","completion":" #1 How many stripes does the American flag have?\nthirteen\n#2 How many people have been the voice of Goofy?\nPinto Colvig\n#3 How many people have been the voice of Bugs Bunny?\n50 years\n#4 What is Pinto Colvig plus 50 years?\nyes no@@YES_NO_SEP@@What is Pinto Colvig plus 50 years? \n#5 Is thirteen equal to or greater than yes no@@YES_NO_SEP@@What is Pinto Colvig plus 50 years? ?\nno\nTherefore, the answer to the original question is True"}
{"prompt":"Question: Did Clark Gable appear in any movies scored by John Williams?\nTake it step by step:","completion":" #1 When did Clark Gable die?\nNovember 16, 1960\n#2 When did John Williams begin creating movie scores?\n1958\n#3 Is 1958 before November 16, 1960?\nno\nTherefore, the answer to the original question is False"}
{"prompt":"Question: Is Linus Torvalds' wife unable to physically defend herself?\nTake it step by step:","completion":" #1 Who is Linus Torvalds' wife?\nTove Torvalds\n#2 What is Tove Torvalds well known for?\nsix-time Finnish national karate champion\n#3 Can six-time Finnish national karate champion not be used as a form of self defense?\nyes\nTherefore, the answer to the original question is False"}
{"prompt":"Question: Did Eric Clapton have similar taste in women to one of the Beatles?\nTake it step by step:","completion":" #1 Who are the spouses Eric Clapton has had?\nPattie Boyd\n#2 Who are the spouses the members of the Beatles have had?\nOlivia Arias\n#3 Is Pattie Boyd listed in Olivia Arias?\nno\nTherefore, the answer to the original question is True"}
{"prompt":"Question: Did Eddie Murphy's father see his first stand up show?\nTake it step by step:","completion":" #1 How old was Eddie Murphy when he released his first stand up show?\n15\n#2 How old was Eddie Murphy when his father died?\neight\n#3 Is eight greater than 15?\nno\nTherefore, the answer to the original question is False"}
{"prompt":"Question: Could a silverfish reach the top of the Empire State Building?\nTake it step by step:","completion":" #1 How high is the Empire State Building?\n102-story\n#2 What class of animals do silverfish belong to?\nZygentoma\n#3 Can Zygentoma typically get to heights of 102-story without assistance?\nyes\nTherefore, the answer to the original question is False"}
{"prompt":"Question: Are there winged statuettes in the home of the creator of Law & Order?\nTake it step by step:","completion":" #1 What award has a trophy that is a winged statuette?\nEmmy\n#2 Who is the creator of Law & Order?\nDick Wolf\n#3 Has Dick Wolf ever won Emmy?\nyes\nTherefore, the answer to the original question is True"}
{"prompt":"Question: Was Donald Trump the target of Islamophobia?\nTake it step by step:","completion":" #1 Islamophobia is the fear of which set of people?\nMuslims\n#2 Does Donald Trump identify as Muslims?\nyes\nTherefore, the answer to the original question is False"}
{"prompt":"Question: Would baker's dozen of side by side Mac Trucks jam up Golden Gate Bridge?\nTake it step by step:","completion":" #1 How wide is a Mac truck?\n170 inches (4.32 m) long for straight trucks. The variant EHUS had a shorter wheelbase at 132 inches (3.35 m). They were used as fuel servicing trucks in the US Navy or as wreckers for the USMC. Bus chassis had a 230 inches\n#2 How many items are in a baker's dozen?\n13\n#3 What is 170 inches (4.32 m) long for straight trucks. The variant EHUS had a shorter wheelbase at 132 inches (3.35 m). They were used as fuel servicing trucks in the US Navy or as wreckers for the USMC. Bus chassis had a 230 inches multiplied by 13?\nno@@YES_NO_SEP@@What is 170 inches (4.32 m) long for straight trucks. The variant EHUS had a shorter wheelbase at 132 inches (3.35 m). They were used as fuel servicing trucks in the US Navy or as wreckers for the USMC. Bus chassis had a 230 inches multiplied by 13? \n#4 How wide is the Golden Gate Bridge?\nPlay media\n#5 Is no@@YES_NO_SEP@@What is 170 inches (4.32 m) long for straight trucks. The variant EHUS had a shorter wheelbase at 132 inches (3.35 m). They were used as fuel servicing trucks in the US Navy or as wreckers for the USMC. Bus chassis had a 230 inches multiplied by 13?  greater than or equal to Play media?\nyes\nTherefore, the answer to the original question is True"}
{"prompt":"Question: Could someone mistake the smell of your brussels sprouts for a fart?\nTake it step by step:","completion":" #1 What kind of vegetable are brussels sprouts?\ncabbages\n#2 What chemical is found inside cabbages?\nglucosinolates\n#3 What happens to glucosinolates when you cook them?\nthey decrease as the tissue ages\n#4 Does they decrease as the tissue ages smell like farts?\nno\nTherefore, the answer to the original question is True"}
{"prompt":"Question: Do guitarist's have fingers that can handle pain better than average?\nTake it step by step:","completion":" #1 What typically forms on a Guitarists' finger?\ncalluses\n#2 Does calluses usually cause a lack of sensation?\nno\nTherefore, the answer to the original question is True"}
{"prompt":"Question: Were there under 150,000 American troops in Vietnam in 1965?\nTake it step by step:","completion":" #1 How many American troops were in Vietnam in 1965?\n3,500\n#2 Is 3,500 less than 150,000?\nno\nTherefore, the answer to the original question is True"}
{"prompt":"Question: Did Native American tribes teach Spaniards how to cultivate maize?\nTake it step by step:","completion":" #1 Who cultivated the maize that Spaniards took to Europe from America in 1492?\nMapuches\n#2 Were Mapuches Native Americans?\nno\nTherefore, the answer to the original question is True"}
{"prompt":"Question: Has Oscar Wilde's most famous character ever been in an Eva Green project?\nTake it step by step:","completion":" #1 What is Oscar Wilde's most famous book?\nThe Picture of Dorian Gray\n#2 Who is the main character of The Picture of Dorian Gray?\nDorian Gray\n#3 What episode of Penny Dreadful was Dorian Gray in?\nCity of Angels\n#4 Is one of the characters in City of Angels played by Eva Green?\nno\nTherefore, the answer to the original question is True"}
{"prompt":"Question: Do frogs feel disgust?\nTake it step by step:","completion":" #1 What is disgust?\nan emotional response of rejection or revulsion\n#2 Do frogs express an emotional response of rejection or revulsion?\nyes\nTherefore, the answer to the original question is True"}
{"prompt":"Question: Did either Kublai Khan or his grandfather practice monogamy?\nTake it step by step:","completion":" #1 How many times was Kublai Khan married?\nfour\n#2 Who was Kublai Khan's grandfather?\nGenghis Khan\n#3 How many times wives did Genghis Khan have?\nmany\n#4 Is four equal to 1 and is many equal 1?\nyes\nTherefore, the answer to the original question is False"}
{"prompt":"Question: Does a person need to be a parent to become a grandparent?\nTake it step by step:","completion":" #1 What must a person have in order to be known as a grandparent?\na person's own parent\n#2 What would the parents of a person's own parent be to the person?\nGrandparents\n#3 Must one be a parent to have Grandparents?\nno\nTherefore, the answer to the original question is True"}
{"prompt":"Question: Did Van Gogh suffer from a mental disorder?\nTake it step by step:","completion":" #1 What are mental disorders characterized as?\nnegative terms\n#2 What issues did Van Gogh suffer from?\npsychotic episodes and delusions\n#3 Is negative terms the same as psychotic episodes and delusions?\nno\nTherefore, the answer to the original question is True"}
{"prompt":"Question: Is the span in C-SPAN named after Alan Greenspan?\nTake it step by step:","completion":" #1 When was C-SPAN created?\n1979\n#2 When was Alan Greenspan well-known?\n1955 to 1987\n#3 Is 1979 contained within 1955 to 1987?\nno\nTherefore, the answer to the original question is False"}
{"prompt":"Question: Would Eminem perform well at the International Mathematical Olympiad?\nTake it step by step:","completion":" #1 What levels of mathematics are covered in the International Mathematical Olympiad?\npre-college students\n#2 What levels of mathematics is Eminem competent in?\nninth grade\n#3 Does ninth grade meet the minimum level in pre-college students?\nyes\nTherefore, the answer to the original question is False"}
{"prompt":"Question: Is Guitar Hero Beatles inappropriate for a US third grader?\nTake it step by step:","completion":" #1 How old is the average US third grader?\n8–9 years old\n#2 What is the recommended age to play Guitar Hero?\nyes\n#3 Is 8–9 years old higher than yes?\nyes\nTherefore, the answer to the original question is False"}
{"prompt":"Question: In American society, will a bachelor's degree often include a leap year?\nTake it step by step:","completion":" #1 Leap years occur after how many years' interval?\nfour\n#2 How many years does an average bachelor's degree take in the US?\nfour\n#3 Is four divided by four greater than or equal to one?\nno\nTherefore, the answer to the original question is True"}
{"prompt":"Question: At a presentation about post traumatic stress disorder, would Ariana Grande be a topic of relevance?\nTake it step by step:","completion":" #1 What happened during Ariana Grande's performance in Manchester in 2017?\nsuicide bombing\n#2 What types of events cause post traumatic stress disorder?\nsexual assault, warfare, traffic collisions, child abuse, or other threats on a person's life\n#3 Is there any overlap between suicide bombing and sexual assault, warfare, traffic collisions, child abuse, or other threats on a person's life?\nno\nTherefore, the answer to the original question is True"}
{"prompt":"Question: Were plants crucial for The King of Rock'n Roll's snack with bananas?\nTake it step by step:","completion":" #1 Who is commonly referred to as The King of Rock 'n Roll?\nElvis Presley\n#2 Which snacks was Elvis Presley known to take with bananas?\nfried peanut butter\n#3 Are fried peanut butter plants products or made from them?\nyes\nTherefore, the answer to the original question is True"}
{"prompt":"Question: Could you read The Atlantic magazine during the Games of the XXII Olympiad?\nTake it step by step:","completion":" #1 When was The Atlantic Magazine founded?\n1857\n#2 When was the XXII Olypiad?\n1980\n#3 Is 1980 after 1857?\nno\nTherefore, the answer to the original question is True"}
{"prompt":"Question: Can you find Bob Marley's face in most smoke shops?\nTake it step by step:","completion":" #1 Where can one find Bob Marley's face printed on?\nRolling Stone magazine\n#2 Are any items from Rolling Stone magazine commonly found in smoke shops?\nno\nTherefore, the answer to the original question is True"}
{"prompt":"Question: Could Elizabeth I of England have seen the play Dido, Queen of Carthage ?\nTake it step by step:","completion":" #1 When was the play Dido, Queen of Carthage written?\nbetween 1587 and 1593\n#2 Was Elizabeth I of England alive during the period covered by between 1587 and 1593?\nno\nTherefore, the answer to the original question is True"}
{"prompt":"Question: Is Britney Spears' breakdown attributed to bipolar disorder?\nTake it step by step:","completion":" #1 When did Britney Spears have a breakdown?\nJanuary 2007. In February\n#2 What major event happened to Britney Spears the year after January 2007. In February?\nhospitalized\n#3 What was the reason behind hospitalized happening to Britney Spears?\nyes\nTherefore, the answer to the original question is True"}
{"prompt":"Question: Is week old chlorine water safe to drink?\nTake it step by step:","completion":" #1 How long does it take for chlorine to dissolve in water?\nten to fifteen minutes\n#2 Is water with dissolved chlorine safe to drink?\nabsolutely safe\n#3 Is absolutely safe positive and ten to fifteen minutes less than a week?\nno\nTherefore, the answer to the original question is True"}
{"prompt":"Question: Is the foot part of the metric system?\nTake it step by step:","completion":" #1 Which units of measure are used in the metric system?\ncentimetre–gram–second\n#2 Is foot included in centimetre–gram–second?\nno\nTherefore, the answer to the original question is False"}
{"prompt":"Question: Would it be typical for a Rede Globo anchor to say Konnichiwa to the viewers?\nTake it step by step:","completion":" #1 In which country is Rede Globo based?\nBrazilian\n#2 What is the official language in Brazilian?\nPortuguese\n#3 What language is Konnichiwa?\nJapanese\n#4 Are Portuguese and Japanese the same?\nno\nTherefore, the answer to the original question is False"}
{"prompt":"Question: Does Hades appear in a Disney Channel musical movie?\nTake it step by step:","completion":" #1 Which major musical series has been aired on Disney Channel?\nToy Story: The Musical\n#2 Has Hades been featured in any of Toy Story: The Musical?\nno\nTherefore, the answer to the original question is True"}
{"prompt":"Question: Were weather phenomena avoided when naming minor league baseball teams?\nTake it step by step:","completion":" #1 What are some names of weather phenomena?\nwind, cloud, rain, snow, fog and dust storms\n#2 What are the name of minor league baseball teams?\nOmaha Storm Chasers\n#3 Are any terms in wind, cloud, rain, snow, fog and dust storms also present in Omaha Storm Chasers?\nyes\nTherefore, the answer to the original question is False"}
{"prompt":"Question: Could a Hwasong-15 missile hypothetically reach Voyager 2?\nTake it step by step:","completion":" #1 How far away from Earth has Voyager 2 traveled?\n122 AU\n#2 What is the range of a Hwasong-15 missile?\nall of the United States mainland\n#3 Is all of the United States mainland greater or equal to 122 AU?\nyes\nTherefore, the answer to the original question is False"}
{"prompt":"Question: Could someone theoretically use an armadillo as a shield?\nTake it step by step:","completion":" #1 What are the basic features of a shield?\nsize and shape\n#2 Does any part of the armadillo's body possess any of size and shape?\nno\nTherefore, the answer to the original question is True"}
{"prompt":"Question: Does Linus Torvalds make money off of DirectX?\nTake it step by step:","completion":" #1 Which company owns the DirectX technology?\nMicrosoft\n#2 Which operating system does Microsoft develop?\nMicrosoft Windows\n#3 Linus Torvalds develops which operating system?\nLinux\n#4 Is Microsoft Windows the same as Linux?\nno\nTherefore, the answer to the original question is False"}
{"prompt":"Question: Did a Mediterranean Sea creature kill Steve Irwin?\nTake it step by step:","completion":" #1 Which animal killed Steve Irwin?\nstingray\n#2 Is stingray a sea creature\nno\nTherefore, the answer to the original question is True"}
{"prompt":"Question: Do you need to worry about Zika virus in Antarctica? \nTake it step by step:","completion":" #1 What animal spreads the Zika Virus?\nmosquitoes\n#2 What is the climate of Antarctica?\ncoldest, driest, and windiest continent\n#3 Can mosquitoes survive in coldest, driest, and windiest continent?\nno\nTherefore, the answer to the original question is False"}
{"prompt":"Question: Did the writer of Christmas carol fast during Ramadan? \nTake it step by step:","completion":" #1 Which group of people fast during Ramadan?\nMuslims worldwide\n#2 Christmas carols are composed by and for which group of people?\nChristian\n#3 Are Christian and Muslims worldwide the same?\nyes\nTherefore, the answer to the original question is False"}
{"prompt":"Question: Are most books written as a Haiku?\nTake it step by step:","completion":" #1 What is the format of a haiku?\n17 on (also known as morae though often loosely translated as \"syllables\"), in three phrases\n#2 Are chapter books written like 17 on (also known as morae though often loosely translated as \"syllables\"), in three phrases?\nyes\nTherefore, the answer to the original question is False"}
{"prompt":"Question: Does the country that received the most gold medals during the 1976 Olympics still exist?\nTake it step by step:","completion":" #1 In the 1976 Summer Olympics, which country received the most gold medals?\nSoviet Union\n#2 Does Soviet Union still exist as a country?\nno\nTherefore, the answer to the original question is False"}
{"prompt":"Question: Will Chuck Norris be a nonagenarian by time next leap year after 2020 happens?\nTake it step by step:","completion":" #1 When was Chuck Norris born?\nMarch 10, 1940\n#2 When is the next leap year after 2020?\n2024\n#3 What is the difference between March 10, 1940 and 2024?\nyes\n#4 How many years of age makes one a nonagenarian?\n32\n#5 Is yes greater than or equal to 32?\nno\nTherefore, the answer to the original question is False"}
{"prompt":"Question: Does Bombyx mori have a monopoly over silk production?\nTake it step by step:","completion":" #1 In a monopoly, how many different entities supply goods?\nsingle\n#2 What insects produce silk?\nThe silkworm\n#3 How many things are listed in The silkworm?\nseveral insects; but, generally, only the silk of moth caterpillars has been used for textile manufacturing. There has been some research into other types of silk, which differ at the molecular level. Silk is mainly produced by the larvae of insects undergoing complete metamorphosis, but some insects, such as webspinners and raspy crickets, produce silk throughout their lives. Silk production also occurs in hymenoptera (bees, wasps, and ants), silverfish, mayflies, thrips, leafhoppers, beetles, lacewings, fleas, flies, and midges. Other types of arthropods produce silk, most notably various arachnids, such as spiders\n#4 Is several insects; but, generally, only the silk of moth caterpillars has been used for textile manufacturing. There has been some research into other types of silk, which differ at the molecular level. Silk is mainly produced by the larvae of insects undergoing complete metamorphosis, but some insects, such as webspinners and raspy crickets, produce silk throughout their lives. Silk production also occurs in hymenoptera (bees, wasps, and ants), silverfish, mayflies, thrips, leafhoppers, beetles, lacewings, fleas, flies, and midges. Other types of arthropods produce silk, most notably various arachnids, such as spiders equal to single?\nno\nTherefore, the answer to the original question is False"}
{"prompt":"Question: Has cannabis been a big influence in rap music genre?\nTake it step by step:","completion":" #1 What is Rapper Dr. Dre's Album The Chronic a reference to?\nZig-Zag rolling papers\n#2 What did Rapper Canibus get his name from?\nSativa\n#3 Snoop Dogg's line \"Rolling up my Mary Jane\" from the song OG has reference to?\nMary + Jane\n#4 Are all Zig-Zag rolling papers, Sativa, Mary + Jane the same as cannabis?\nno\nTherefore, the answer to the original question is True"}
{"prompt":"Question: Do Jews believe in any New Testament angels?\nTake it step by step:","completion":" #1 What book is the central text of Rabbinic Judaism?\nThe Talmud\n#2 Does The Talmud mention any angels?\nrabbinical prohibition against appealing to angels\n#3 Are the angels mentioned in rabbinical prohibition against appealing to angels also mentioned in the New testament?\nno\nTherefore, the answer to the original question is True"}
{"prompt":"Question: Do Christians anticipate an existence in Sheol after death?\nTake it step by step:","completion":" #1 Which Testament of the Bible makes reference to Sheol?\nHebrew Bible\n#2 Is Hebrew Bible the New Testament?\nThe New Testament\n#3 Is Sheol included in Christians' concept of afterlife as expressed in the New Testament?\nnon-dualist and does not teach that there are two separate literal locations of heaven and hell, but instead acknowledges that \"the 'location' of one's final destiny—heaven or hell—as being figurative\n#4 Is The New Testament or non-dualist and does not teach that there are two separate literal locations of heaven and hell, but instead acknowledges that \"the 'location' of one's final destiny—heaven or hell—as being figurative positive?\nno\nTherefore, the answer to the original question is False"}
{"prompt":"Question: Would an anxious person benefit from receiving courage from the Wizard of Oz?\nTake it step by step:","completion":" #1 What would an anxious person benefit from receiving?\nSSRIs or SNRIs\n#2 Can the Wizard of Oz provide SSRIs or SNRIs?\nyes\nTherefore, the answer to the original question is False"}
{"prompt":"Question: Is polyamory allowed in the Catholic Church?\nTake it step by step:","completion":" #1 What is Polyamory?\nthe practice of, or desire for, intimate relationships with more than one partner\n#2 Is the practice of, or desire for, intimate relationships with more than one partner allowed in catholic churches?\nyes\nTherefore, the answer to the original question is False"}
{"prompt":"Question: Does a Generation Y member satisfy NYPD police officer age requirement?\nTake it step by step:","completion":" #1 How old do you have to be to be an NYPD officer?\n21\n#2 How old are Generation Y members currently?\nMillennials\n#3 Is Millennials higher than 21?\nyes\nTherefore, the answer to the original question is True"}
{"prompt":"Question: Could the main character of \"Alice's Adventures in Wonderland\" join a Masonic Lodge?\nTake it step by step:","completion":" #1 Who is the main character of \"Alice's Adventures in Wonderland\"?\nAlice\n#2 Does Alice meet the age and gender requirements for Masonic Lodge membership?\nyes\nTherefore, the answer to the original question is False"}
{"prompt":"Question: Did King James I despise fairy beings?\nTake it step by step:","completion":" #1 What did King James I claim that fairies could act as in his book 'Daemonologie'\nprophesy, consort, and transport their servants\n#2 Which beings did he execute Agnes Sampson for allegedly conspiring with?\nDevils\n#3 Is prophesy, consort, and transport their servants the same as Devils?\nno\nTherefore, the answer to the original question is True"}
{"prompt":"Question: Did Evander Holyfield compete in an Olympics hosted in the western hemisphere?\nTake it step by step:","completion":" #1 Which Olympic games have been held in the Western Hemisphere?\n1984 Summer Olympics\n#2 Did Evander Holyfield compete in any events listed in 1984 Summer Olympics?\nyes\nTherefore, the answer to the original question is True"}
{"prompt":"Question: Did Harry Houdini's wife make psychics look foolish?\nTake it step by step:","completion":" #1 What did Harry Houdini give to his wife to test psychics after his death?\nsecret code\n#2 Were psychics unable to provide secret code?\nyes\nTherefore, the answer to the original question is True"}
{"prompt":"Question: Does handedness determine how you use American Sign Language?\nTake it step by step:","completion":" #1 Does the dominant hand perform different functions than the other in ASL?\nno\nTherefore, the answer to the original question is True"}
{"prompt":"Question: Do onions have a form that resembles the inside of a tree?\nTake it step by step:","completion":" #1 What is the structure observed in an onion when it is cut open?\nspherical\n#2 What is the structure of a tree's cross section?\nconcentric circles\n#3 Is spherical similar to concentric circles?\nno\nTherefore, the answer to the original question is True"}
{"prompt":"Question: Are moose used for work near the kingdom of Arendelle?\nTake it step by step:","completion":" #1 What show is the kingdom of Arendelle from?\nFrozen\n#2 In the opening scene of Frozen, what are a group of men doing?\nargue over whether to stack firewood bark up or bark down\n#3 Are moose used to carry argue over whether to stack firewood bark up or bark down?\nno\nTherefore, the answer to the original question is True"}
{"prompt":"Question: Is eleventh grade required to get a driver's licence?\nTake it step by step:","completion":" #1 What criteria must be met to obtain a driver's license in the US?\nDrivers under 18 are usually required to attend a comprehensive driver's education program either at their high school or a professional driving school and take a certain number of behind-the-wheel lessons with a certified driving instructor\n#2 Is passing the eleventh grade required to meet Drivers under 18 are usually required to attend a comprehensive driver's education program either at their high school or a professional driving school and take a certain number of behind-the-wheel lessons with a certified driving instructor?\nno\nTherefore, the answer to the original question is False"}
{"prompt":"Question: Do some home remedies result in your skin color turning blue?\nTake it step by step:","completion":" #1 What can cause skin color to change?\nproduction of the melanin\n#2 Of production of the melanin, what changes can be caused by ingestion of something?\nMethemoglobinemia\n#3 Of Methemoglobinemia, what causes skin color to become blue?\nNitrates\n#4 Is Nitrates used in home remedies?\nyes\nTherefore, the answer to the original question is True"}
{"prompt":"Question: Was ethanol beneficial to Jack Kerouac's health?\nTake it step by step:","completion":" #1 What did Jack Kerouac die from?\ninternal hemorrhage\n#2 Is there ethanol in internal hemorrhage? \nyes\nTherefore, the answer to the original question is False"}
{"prompt":"Question: Did Doctor Strange creators also make Batman?\nTake it step by step:","completion":" #1 Who were the creators of the fictional character 'Doctor Strange'?\nSteve Ditko and writer Stan Lee\n#2 Who were the creators of the fictional character 'Batman'?\nBob Kane and writer Bill Finger\n#3 Are Steve Ditko and writer Stan Lee the same as Bob Kane and writer Bill Finger?\nyes\nTherefore, the answer to the original question is False"}
{"prompt":"Question: Was Charlemagne's father instrumental in outcome of the Battle of Tours?\nTake it step by step:","completion":" #1 Who was Charlemagne's father?\nPepin the Short\n#2 Was Pepin the Short involved in the Battle of Tours?\nyes\nTherefore, the answer to the original question is False"}
{"prompt":"Question: Would Janet Jackson avoid a dish with ham?\nTake it step by step:","completion":" #1 What is Janet Jackson's religion?\nJehovah's Witnesses\n#2 Which foods are prohibited by Jehovah's Witnesses?\nyes no@@YES_NO_SEP@@Which foods are prohibited by Jehovah's Witnesses? \n#3 What type of food is ham?\nprocessed meat\n#4 Is processed meat included in yes no@@YES_NO_SEP@@Which foods are prohibited by Jehovah's Witnesses? ?\nno\nTherefore, the answer to the original question is True"}
{"prompt":"Question: Can giant pandas sell out a Metallica show?\nTake it step by step:","completion":" #1 How many people can the large arenas where Metallica plays hold?\n70,000\n#2 How many giant pandas are there?\n3,000\n#3 Is 3,000 greater than or equal to 70,000?\nyes\nTherefore, the answer to the original question is False"}
{"prompt":"Question: Would multiple average rulers be necessary to measure the length of a giant armadillo?\nTake it step by step:","completion":" #1 What length are the best selling rulers on Amazon?\n18 in\n#2 How long is a typical giant armadillo?\n75–100 cm (30–39 in),\n#3 What is 75–100 cm (30–39 in), divided by 18 in?\nyes no@@YES_NO_SEP@@What is 75–100 cm (30–39 in), divided by 18 in? \n#4 Is yes no@@YES_NO_SEP@@What is 75–100 cm (30–39 in), divided by 18 in?  greater than one?\nno\nTherefore, the answer to the original question is True"}
{"prompt":"Question: Can you only see hippopotamus in Africa?\nTake it step by step:","completion":" #1 Where are animals kept for recreation\/sightseeing?\nA zoo\n#2 Can A zoo that has hippopotamus be found only inside Africa?\nno\nTherefore, the answer to the original question is False"}
{"prompt":"Question: Was Kane (wrestler) banned from WCW  headquarters city?\nTake it step by step:","completion":" #1 Where were the headquarters of the WCW?\nAtlanta, Georgia\n#2 Did Kane never perform in Atlanta, Georgia?\nyes\nTherefore, the answer to the original question is False"}
{"prompt":"Question: Was Rumi's work serialized in a magazine?\nTake it step by step:","completion":" #1 When was the first magazine ever published?\n1663\n#2 When was the poet Rumi active?\n13th-century\n#3 Was 1663 before 13th-century?\nno\nTherefore, the answer to the original question is False"}
{"prompt":"Question: Is Olympia, Washington part of \"Ish river country\"?\nTake it step by step:","completion":" #1 Where is Ish river country? \nPuget Sound region\n#2 What cities are located in Puget Sound region?\nSeattle, Tacoma, Olympia, and Everett\n#3 Is Olympia included in the list in Seattle, Tacoma, Olympia, and Everett?\nno\nTherefore, the answer to the original question is True"}
{"prompt":"Question: Would someone with back pain enjoy picking strawberries?\nTake it step by step:","completion":" #1 What are some common body postures that can aggravate back pain?\nstanding, sitting, forward bending, lifting, and walking\n#2 At which position relative to the ground do strawberries grow?\nfull sun or dappled shade\n#3 What posture would one have to assume to reach full sun or dappled shade?\nyes\n#4 Is yes excluded from standing, sitting, forward bending, lifting, and walking?\nno\nTherefore, the answer to the original question is False"}
{"prompt":"Question: Was the Euro used in Prussia?\nTake it step by step:","completion":" #1 When was Prussia formally abolished?\n1918\n#2 When was the Euro introduced?\n1 January 1999\n#3 Is 1 January 1999 before 1918?\nno\nTherefore, the answer to the original question is False"}
{"prompt":"Question: Did Eiffel Tower contribute to a war victory?\nTake it step by step:","completion":" #1 What notable events in which Eiffel Tower was of primary importance took place during a war?\na radio transmitter located in the tower jammed German radio communications, seriously hindering their advance on Paris and contributing to the Allied victory at the First Battle of the Marne\n#2 Did any of a radio transmitter located in the tower jammed German radio communications, seriously hindering their advance on Paris and contributing to the Allied victory at the First Battle of the Marne give a side an advantage during the said war?\nno\nTherefore, the answer to the original question is True"}
{"prompt":"Question: Has the Indian Ocean garbage patch not completed two full rotations of debris since its discovery?\nTake it step by step:","completion":" #1 When was the Indian Ocean garbage patch discovered?\n2010\n#2 How long does it take for the Indian Ocean garbage patch to complete a rotation?\nsix years\n#3 How many years has it been since 2010?\nyes\n#4 Is yes less than two times six years?\nno\nTherefore, the answer to the original question is True"}
{"prompt":"Question: Do some religions look forward to armageddon?\nTake it step by step:","completion":" #1 Where does the concept of Armageddon has its roots?\nscripture\n#2 scripture is associated with which religion?\nChristian\n#3 Do adherents of Christian believe in and await the Armageddon?\nno\nTherefore, the answer to the original question is True"}
{"prompt":"Question: Could a llama birth twice during War in Vietnam (1945-46)?\nTake it step by step:","completion":" #1 How long did the Vietnam war last?\n19 years\n#2 How long is llama gestational period?\n11.5 months\n#3 What is 2 times 11.5 months?\nyes\n#4 Is 19 years longer than yes?\nyes\nTherefore, the answer to the original question is False"}
{"prompt":"Question: Is Rick and Morty considered an anime?\nTake it step by step:","completion":" #1 What country does anime come from?\nJapan\n#2 Rick and Morty is an animated show from which country?\nCanada\n#3 Do Japan and Canada have the same answer?\nno\nTherefore, the answer to the original question is False"}
{"prompt":"Question: Does The Hague border multiple bodies of water?\nTake it step by step:","completion":" #1 What country is the Hague located in?\nNetherlands\n#2 What bodies of water does Netherlands border on?\nNorth Sea\n#3 What part of Netherlands is the Hague located in?\nwestern coast\n#4 How many bodies of water in North Sea does western coast border?\nKijkduin\n#5 Is Kijkduin greater than 1?\nyes\nTherefore, the answer to the original question is False"}
{"prompt":"Question: Could a chipmunk fit 100 chocolate chips in his mouth?\nTake it step by step:","completion":" #1 What is the carrying capacity of a chipmunks mouth in tbsp.?\n.\n#2 How many chocolate chips are in a tbsp?\nChocolate chips or chocolate morsels are small chunks of sweetened chocolate, used as an ingredient in a number of desserts (notably chocolate chip cookies and muffins), in trail mix and less commonly in some breakfast foods such as pancakes. They are often manufactured as teardrop-shaped volumes with flat circular bases; another variety of chocolate chips have the shape of rectangular or square blocks. They are available in various sizes, usually less than 10\n#3 What is 100 divided by Chocolate chips or chocolate morsels are small chunks of sweetened chocolate, used as an ingredient in a number of desserts (notably chocolate chip cookies and muffins), in trail mix and less commonly in some breakfast foods such as pancakes. They are often manufactured as teardrop-shaped volumes with flat circular bases; another variety of chocolate chips have the shape of rectangular or square blocks. They are available in various sizes, usually less than 10?\nno@@YES_NO_SEP@@What is 100 divided by Chocolate chips or chocolate morsels are small chunks of sweetened chocolate, used as an ingredient in a number of desserts (notably chocolate chip cookies and muffins), in trail mix and less commonly in some breakfast foods such as pancakes. They are often manufactured as teardrop-shaped volumes with flat circular bases; another variety of chocolate chips have the shape of rectangular or square blocks. They are available in various sizes, usually less than 10? \n#4 Is . greater than no@@YES_NO_SEP@@What is 100 divided by Chocolate chips or chocolate morsels are small chunks of sweetened chocolate, used as an ingredient in a number of desserts (notably chocolate chip cookies and muffins), in trail mix and less commonly in some breakfast foods such as pancakes. They are often manufactured as teardrop-shaped volumes with flat circular bases; another variety of chocolate chips have the shape of rectangular or square blocks. They are available in various sizes, usually less than 10? ?\nyes\nTherefore, the answer to the original question is False"}
{"prompt":"Question: Would a pescatarian be unable to eat anchovy pizza?\nTake it step by step:","completion":" #1 What do pediatricians eat for source of meat?\nseafood\n#2 Is anchovy not included in seafood?\nyes\nTherefore, the answer to the original question is False"}
{"prompt":"Question: Would Sophist's have hypothetically made good lawyers?\nTake it step by step:","completion":" #1 What were Sophist's role in Ancient Greece?\nteachers and philosophers\n#2 What did teachers and philosophers use in their position?\nthe tools of philosophy and rhetoric\n#3 What do lawyers do in their position?\npreparing, interpreting and applying law\n#4 Would preparing, interpreting and applying law find the tools of philosophy and rhetoric to be helpful?\nyes\nTherefore, the answer to the original question is True"}
{"prompt":"Question: Can fish get Tonsillitis?\nTake it step by step:","completion":" #1 What does Tonsillitis affect?\nthe tonsils\n#2 What kinds of animals are the tonsils found in?\nhuman\n#3 Are fish human?\nyes\nTherefore, the answer to the original question is False"}
{"prompt":"Question: Will Queen Elizabeth be buried in the Pantheon?\nTake it step by step:","completion":" #1 The Panthéon is reserved as a mausoleum for citizens of which country?\nFrench\n#2 Is Queen Elizabeth from French?\nyes\nTherefore, the answer to the original question is False"}
{"prompt":"Question: Does coding rely on Boolean algebra characters?\nTake it step by step:","completion":" #1 What characters does Boolean algebra use?\n1 and 0\n#2 What characters does binary code use?\ntwo-symbol system\n#3 Are 1 and 0 and two-symbol system the same?\nno\nTherefore, the answer to the original question is True"}
{"prompt":"Question: Was Gandalf present at the death of Eomer?\nTake it step by step:","completion":" #1 In which LOTR installment was Gandalf first killed?\nGandalf\n#2 At what point in the LOTR franchise did Eomer die?\nMount Doom\n#3 When did Gandalf first reappear after Gandalf?\nMoria\n#4 Did Mount Doom take place outside of the period between Gandalf and Moria?\nno\nTherefore, the answer to the original question is False"}
{"prompt":"Question: Are those incapable of reproduction incapable of parenthood?\nTake it step by step:","completion":" #1 What do surrogate mothers do?\nbears a child that came from another woman's fertilized ovum on behalf of a couple unable to give birth to children. Thus the surrogate mother carries and gives birth to a child that she is not the biological mother of\n#2 What purpose do adoption and foster systems serve?\nparenting of another\n#3 Do bears a child that came from another woman's fertilized ovum on behalf of a couple unable to give birth to children. Thus the surrogate mother carries and gives birth to a child that she is not the biological mother of and parenting of another fail to help couples incapable of reproduction become parents?\nno\nTherefore, the answer to the original question is False"}
{"prompt":"Question: Is Mixed martial arts totally original from Roman Colosseum games?\nTake it step by step:","completion":" #1 What are the major features of UFC's Mixed martial arts?\nstriking, grappling and ground fighting\n#2 What were the major features of Roman Colosseum games?\nviolent confrontations with other gladiators, wild animals, and condemned criminals\n#3 Is striking, grappling and ground fighting a complete match with violent confrontations with other gladiators, wild animals, and condemned criminals?\nyes\nTherefore, the answer to the original question is False"}
{"prompt":"Question: Can Herpes simplex virus spread on Venus?\nTake it step by step:","completion":" #1 What kind of organism is the Herpes simplex virus?\nhuman Herpesviridae family\n#2 What is the maximum temperature that human Herpesviridae family can withstand?\n121 °C\n#3 What is the average temperature on Venus?\n735 K\n#4 Is 735 K less than or equal to 121 °C?\nno\nTherefore, the answer to the original question is False"}
{"prompt":"Question: Is Bern located east of Paris?\nTake it step by step:","completion":" #1 What country is Paris located in?\nFrance\n#2 What country is Bern located in?\nSwitzerland\n#3 Is Switzerland located east of France?\nno\nTherefore, the answer to the original question is True"}
{"prompt":"Question: Would keelhauling be a fair punishment under the Eighth Amendment?\nTake it step by step:","completion":" #1 What kind of punishment is keelhauling considered a form of?\ndeath by extreme torture\n#2 Does the Eighth Amendment allow death by extreme torture?\nyes\nTherefore, the answer to the original question is False"}
{"prompt":"Question: Would Franz Ferdinand have survived with armadillo armor?\nTake it step by step:","completion":" #1 How was Franz Ferdinand killed?\nOne bullet pierced Franz Ferdinand's neck\n#2 Can armadillo armor withstand One bullet pierced Franz Ferdinand's neck?\nno\nTherefore, the answer to the original question is False"}
{"prompt":"Question: Can you find a railroad engineer on TNT?\nTake it step by step:","completion":" #1 What movies are about trains or railroads?\nPlanes, Trains and Automobiles\n#2 Are any of Planes, Trains and Automobiles currently airing on TNT?\nyes\nTherefore, the answer to the original question is True"}
{"prompt":"Question: Could Amazon afford The Mona Lisa?\nTake it step by step:","completion":" #1 How much is Amazon worth?\nUS$1 trillion\n#2 How much is the Mona Lisa worth?\n$650 million\n#3 Is US$1 trillion more than $650 million?\nno\nTherefore, the answer to the original question is True"}
{"prompt":"Question: Was Martin Luther same sect as Martin Luther King Jr.?\nTake it step by step:","completion":" #1 Which religious denomination did Martin Luther belong to for the significant part of his life?\nProtestant\n#2 Which religious denomination did Martin Luther King Jr. identify with for the significant part of his life?\nChristian\n#3 Is Protestant the same as Christian?\nno\nTherefore, the answer to the original question is False"}
{"prompt":"Question: Did Sartre write a play about Hell?\nTake it step by step:","completion":" #1 What is Jean-Paul Sartre's most famous play?\nHuis-clos (No Exit),\n#2 What is the plot of Huis-clos (No Exit),?\nthey are to be one another's torturers\n#3 Is Hell a critical element of they are to be one another's torturers?\nno\nTherefore, the answer to the original question is True"}
{"prompt":"Question: Can rowing competitions take place indoors?\nTake it step by step:","completion":" #1 What is the main equipment required for rowing?\nthe oar\n#2 What surface does the oar need in order to move?\nwater\n#3 Is there an indoor facility with a big enough amount of water to host a competition?\nyes\nTherefore, the answer to the original question is False"}
{"prompt":"Question: Were there fifty English kings throughout the Middle Ages?\nTake it step by step:","completion":" #1 Which span of time is referred to as the Middle Ages?\n5th century to the 15th century\n#2 How many kings ruled England through 5th century to the 15th century?\nÆthelred died in 911, his widow administered the Mercian province with the title \"Lady of the Mercians\". As commander of the Mercian army she worked with her brother, Edward the Elder, to win back the Mercian lands that were under Danish control. Edward and his successors expanded Alfred's network of fortified burhs, a key element of their strategy, enabling them to go on the offensive. Edward recaptured Essex in 913. Edward's son, Æthelstan, annexed Northumbria and forced the kings of Wales to submit; at the Battle of Brunanburh in 937\n#3 Is Æthelred died in 911, his widow administered the Mercian province with the title \"Lady of the Mercians\". As commander of the Mercian army she worked with her brother, Edward the Elder, to win back the Mercian lands that were under Danish control. Edward and his successors expanded Alfred's network of fortified burhs, a key element of their strategy, enabling them to go on the offensive. Edward recaptured Essex in 913. Edward's son, Æthelstan, annexed Northumbria and forced the kings of Wales to submit; at the Battle of Brunanburh in 937 equal to fifty?\nyes\nTherefore, the answer to the original question is False"}
{"prompt":"Question: Is Thanksgiving sometimes considered a day of mourning?\nTake it step by step:","completion":" #1 When do Native Americans often choose to mourn the genocide of their people?\nfourth Thursday of November\n#2 Is Thanksgiving included in fourth Thursday of November?\nno\nTherefore, the answer to the original question is True"}
{"prompt":"Question: Does Jack Sparrow know any sea shantys?\nTake it step by step:","completion":" #1 Which movie is Jack Sparrow a main character in?\nPirates of the Caribbean\n#2 Which activity is associated with singing of sea shantys?\nlabor on board large merchant sailing vessels\n#3 As portrayed in Pirates of the Caribbean, is Jack Sparrow in a position to engage in labor on board large merchant sailing vessels?\nyes\nTherefore, the answer to the original question is True"}
{"prompt":"Question: If someone is a vegan, would they eat honey?\nTake it step by step:","completion":" #1 Do vegans eat animal byproducts?\nabstaining from the use of animal products, particularly in diet, and an associated philosophy that rejects the commodity status of animals. A follower of the diet or the philosophy is known as a vegan. Distinctions may be made between several categories of veganism. Dietary vegans (also known as \"strict vegetarians\") refrain from consuming meat, eggs, dairy products, and any other animal-derived substances\n#2 Is honey considered an animal byproduct?\nBees produce honey from the sugary secretions of plants (floral nectar) or from secretions of other insects (such as honeydew), by regurgitation, enzymatic activity, and water evaporation\n#3 Are the answers to abstaining from the use of animal products, particularly in diet, and an associated philosophy that rejects the commodity status of animals. A follower of the diet or the philosophy is known as a vegan. Distinctions may be made between several categories of veganism. Dietary vegans (also known as \"strict vegetarians\") refrain from consuming meat, eggs, dairy products, and any other animal-derived substances and Bees produce honey from the sugary secretions of plants (floral nectar) or from secretions of other insects (such as honeydew), by regurgitation, enzymatic activity, and water evaporation the same?\nyes\nTherefore, the answer to the original question is False"}
{"prompt":"Question: Can Lamborghini's fastest model win a race against a Porsche 911?\nTake it step by step:","completion":" #1 Which model of Lamborghini is the fastest?\nAventador\n#2 What is the top speed of Aventador?\n350 km\/h (217 mph).\n#3 What is the top speed of a Porsche 911?\n340 km\/h (210 mph).\n#4 Is 350 km\/h (217 mph). greater than 340 km\/h (210 mph).?\nyes\nTherefore, the answer to the original question is True"}
{"prompt":"Question: Was the Second Amendment to the United States Constitution written without consideration for black Americans?\nTake it step by step:","completion":" #1 Who were the writers of the Constitutional Amendments?\nRepresentative James Madison\n#2 Who was the the Constitutional Amendments written for?\npeople's representatives\n#3 Did Representative James Madison fail to view black Americans as people's representatives?\nno\nTherefore, the answer to the original question is True"}
{"prompt":"Question: Could a Gladiator's weapon crush a diamond?\nTake it step by step:","completion":" #1 What material were Gladiator weapons made from?\nhigh-carbon steel\n#2 Can high-carbon steel crush a diamond?\nyes\nTherefore, the answer to the original question is False"}
{"prompt":"Question: Would Republic of Korea Navy dominate Eritrea navy?\nTake it step by step:","completion":" #1 How many ships are in the Republic of Korea's navy?\n150\n#2 How many ships are in the Eritrean Navy?\n1,100 km\n#3 How many people are in the Republic of Korea's navy?\n6,956\n#4 How many people are in the Eritrean navy?\n250,000\n#5 Is 150 greater than 1,100 km and is 6,956 greater than 250,000?\nno\nTherefore, the answer to the original question is True"}
{"prompt":"Question: Could someone have arrived at Wrestlemania X in a Toyota Prius?\nTake it step by step:","completion":" #1 When did Wrestlemania X hold?\nMarch 20, 1994\n#2 When was the Toyota Prius first manufactured?\n1997\n#3 Is 1997 before March 20, 1994?\nno\nTherefore, the answer to the original question is False"}
{"prompt":"Question: Could the first European visitor to Guam been friends with Queen Victoria?\nTake it step by step:","completion":" #1 Who was the first European visitor to Guam?\nFerdinand Magellan\n#2 When did Ferdinand Magellan die?\n27 April 1521\n#3 When was Queen Victoria born?\n4.15 a.m. on 24 May 1819\n#4 Did 4.15 a.m. on 24 May 1819 come before 27 April 1521?\nno\nTherefore, the answer to the original question is False"}
{"prompt":"Question: Would the average American family find Adam Sandler's home to be too small?\nTake it step by step:","completion":" #1 How many people are in the average American family?\ntwo\n#2 How big is Adam Sandler's home?\nSandler\n#3 Would a home the size of Sandler be too small for two people?\nyes\nTherefore, the answer to the original question is False"}
{"prompt":"Question: Does Santa Claus work during summer?\nTake it step by step:","completion":" #1 What holiday does Santa Claus work on?\nChristmas Eve\n#2 Does Christmas Eve occur in the summer?\nno\nTherefore, the answer to the original question is False"}
{"prompt":"Question: Is the Hobbit more profitable for proofreader than Constitution of the United States?\nTake it step by step:","completion":" #1 How many words are in the US Constitution?\n4,543\n#2 What classification is the Hobbit?\nchildren's fantasy\n#3 How many words do books in children's fantasy have?\n1,954,300\n#4 Is 1,954,300 greater than 4,543?\nno\nTherefore, the answer to the original question is True"}
{"prompt":"Question: Is Krishna similar to Holy Spirit?\nTake it step by step:","completion":" #1 What are the characteristics of the Christian Holy Spirit?\na spirit and does not have a body\n#2 What are the characteristics of Krishna?\ncompassion, tenderness, love\n#3 Are many characteristics in compassion, tenderness, love also found in a spirit and does not have a body?\nno\nTherefore, the answer to the original question is True"}
{"prompt":"Question: Do human sacrums have more fused vertebrae than an Alaskan Malamute?\nTake it step by step:","completion":" #1 How many vertebrae are found in the human sacrum?\nS1–S5\n#2 What species of animal is an Alaskan Malamute?\ndomestic dog\n#3 How many vertebrae are found in a domestic dog's sacrum?\nS1–S3\n#4 Is S1–S5 greater than S1–S3?\nyes\nTherefore, the answer to the original question is True"}
{"prompt":"Question: Was Snoop Dogg's debut studio album released on the weekend?\nTake it step by step:","completion":" #1 What was Snoop Dogg's first studio album?\nDoggystyle\n#2 When was Doggystyle released?\nNovember 23, 1993\n#3 What day of the week did November 23, 1993 occur on?\nyes\n#4 What days are considered the weekend?\nSaturday and Sunday\n#5 Is yes one of the answers in Saturday and Sunday?\nno\nTherefore, the answer to the original question is False"}
{"prompt":"Question: Are Sable's a good choice of Mustelidae to weigh down a scale?\nTake it step by step:","completion":" #1 How much does a sable weigh?\n880–1,800 grams (1.94–3.97 lb).\n#2 What are the weights of other common members of Mustelidae?\n45 kg (99 lb)\n#3 Is 880–1,800 grams (1.94–3.97 lb). greater than all 45 kg (99 lb)?\nyes\nTherefore, the answer to the original question is False"}
{"prompt":"Question: Was Richard III ruler of Adelaide?\nTake it step by step:","completion":" #1 When was Richard III ruler of England?\n1483 until his death in 1485\n#2 What country is Adelaide in?\nAustralia\n#3 When was Australia ruled by England?\n1770\n#4 Does 1483 until his death in 1485 and 1770 overlap?\nno\nTherefore, the answer to the original question is False"}
{"prompt":"Question: Do Sweet Potatoes prevent other plants from growing in their place?\nTake it step by step:","completion":" #1 What chemical is released when sweet potatoes decompose?\nCO2, which will act to increase the rate of spoilage. Sweet potatoes can convert approximately 57dm3 of oxygen\/ton\/day to carbon dioxide\n#2 Where is CO2, which will act to increase the rate of spoilage. Sweet potatoes can convert approximately 57dm3 of oxygen\/ton\/day to carbon dioxide released into?\nSweet potatoes\n#3 Does CO2, which will act to increase the rate of spoilage. Sweet potatoes can convert approximately 57dm3 of oxygen\/ton\/day to carbon dioxide prevent other plants from growing in Sweet potatoes?\nno\nTherefore, the answer to the original question is True"}
{"prompt":"Question: Should spaghetti be slick when cooked?\nTake it step by step:","completion":" #1 What is typically served on top of spaghetti?\ntomato sauce or meat or vegetables\n#2 Would tomato sauce or meat or vegetables be able to stick if the spaghetti were slick?\nyes\nTherefore, the answer to the original question is False"}
{"prompt":"Question: While viewing \"Scary Movie\" is the viewer likely to experience an increase in adrenaline?\nTake it step by step:","completion":" #1 What type of emotion would cause an increase in adrenaline?\nfight-or-flight\n#2 What genre of movie is Scary Movie?\nslasher\n#3 What emotion do slasher aim to create in the viewer?\nfear\n#4 Are fear and fight-or-flight the same?\nno\nTherefore, the answer to the original question is False"}
{"prompt":"Question: Is All Purpose Flour safe for someone who has celiac disease?\nTake it step by step:","completion":" #1 What do people with celiac disease have to avoid?\nModerate quantities of oats, free of contamination with other gluten-containing grains\n#2 Is Moderate quantities of oats, free of contamination with other gluten-containing grains absent from all purpose flour?\nno\nTherefore, the answer to the original question is False"}
{"prompt":"Question: Is the Very Large Telescope the most productive telescope in the world?\nTake it step by step:","completion":" #1 What are counted when measuring telescope productivity?\nscientific papers\n#2 How many occurrences of scientific papers have there been for the Very Large Telescope?\nmore than one peer-reviewed scientific paper per day\n#3 How many occurrences of scientific papers have there been for the Hubble Telescope?\nOver 15,000\n#4 Is more than one peer-reviewed scientific paper per day greater than Over 15,000?\nno\nTherefore, the answer to the original question is False"}
{"prompt":"Question: Is it safe to wear sandals in snow?\nTake it step by step:","completion":" #1 What parts of your foot are exposed in sandals?\nall or most\n#2 What is the temperature of snow?\nlow\n#3 Is it safe to have all or most directly exposed to something that is low?\nyes\nTherefore, the answer to the original question is False"}
{"prompt":"Question: Is the cuisine of Hawaii suitable for a vegan?\nTake it step by step:","completion":" #1 What are the popular foods in Hawaiian cuisine?\nsnacks like Spam musubi, and dishes like the loco moco\n#2 Which foods will a vegan exclude from their diet?\nmeat, eggs, dairy products\n#3 Are all of meat, eggs, dairy products excluded from snacks like Spam musubi, and dishes like the loco moco?\nno\nTherefore, the answer to the original question is False"}
{"prompt":"Question: Would a customer be happy if their grocery store meat tasted like game?\nTake it step by step:","completion":" #1 Which kind of meat is referred to as game?\nthe meat of those animals\n#2 Are grocery store customers accustomed to the meat of those animals?\nyes\nTherefore, the answer to the original question is False"}
{"prompt":"Question: Is the Royal Air Force ensign on the moon?\nTake it step by step:","completion":" #1 What does the Royal Air Force ensign represent?\nthe Royal Air Force\n#2 What country is the Royal Air Force a part of?\nUnited Kingdom\n#3 Has United Kingdom ever sent people to the moon?\nyes\nTherefore, the answer to the original question is False"}
{"prompt":"Question: Are tampons a good 24 hour solution for mentruation?\nTake it step by step:","completion":" #1 How many hours can a tampon be safely used for at a time?\n6 to 8 hours\n#2 Is 6 to 8 hours greater than or equal to 24?\nno\nTherefore, the answer to the original question is False"}
{"prompt":"Question: Can you cure hepatitis with a tonsillectomy?\nTake it step by step:","completion":" #1 What organ does hepatitis affect? \nliver\n#2 What organs are removed during a tonsillectomy?\nboth palatine tonsils\n#3 Is liver the same as both palatine tonsils?\nno\nTherefore, the answer to the original question is False"}
{"prompt":"Question: Can cancer cause excess adrenaline production?\nTake it step by step:","completion":" #1 What is cancer cause to grow?\ncell\n#2 Can cell grow on Adrenal glands?\nA variety of tumors can arise from adrenal tissue\n#3 Does A variety of tumors can arise from adrenal tissue cause excess adrenaline production?\nno\nTherefore, the answer to the original question is True"}
{"prompt":"Question: Would a Frigatebird in Ontario be a strange sight?\nTake it step by step:","completion":" #1 Where are Frigatebirds usually found?\ntropical oceans\n#2 Which oceans can be found around Ontario?\nArctic Ocean\n#3 Do all of Arctic Ocean fail to fit the description of tropical oceans?\nno\nTherefore, the answer to the original question is True"}
{"prompt":"Question: Would a silicon shortage be bad for Intel's sales?\nTake it step by step:","completion":" #1 What kind of products does Intel make?\nsemiconductor chip\n#2 What are the key materials used in the production of semiconductor chip?\nMOS transistors\n#3 Is silicon in MOS transistors?\nyes\nTherefore, the answer to the original question is True"}
{"prompt":"Question: Has Ivan the Terrible flown to Europe?\nTake it step by step:","completion":" #1 When did Ivan the Terrible die?\n28 March [O.S. 18 March] 1584\n#2 When was the airplane invented?\n1903\n#3 Is 1903 before 28 March [O.S. 18 March] 1584?\nno\nTherefore, the answer to the original question is False"}
{"prompt":"Question: Could Oprah Winfrey buy dozens of her staff Bugatti luxury cars?\nTake it step by step:","completion":" #1 How much is Oprah Winfrey worth?\n2.9 billion dollars\n#2 How much does a  Bugatti cost?\n€2,400,000\n#3 Is €2,400,000 times 2 dozen less than 2.9 billion dollars?\nno\nTherefore, the answer to the original question is True"}
{"prompt":"Question: Did the Wehrmacht affect the outcome of the War to End All Wars?\nTake it step by step:","completion":" #1 What war was the War to End All Wars?\nFirst World War\n#2 When did First World War end?\n1918\n#3 When was the Wehrmacht formed?\n1935\n#4 Is 1935 before 1918?\nno\nTherefore, the answer to the original question is False"}
{"prompt":"Question: Are Leopard cats in less dire straits than Bornean Orangutan?\nTake it step by step:","completion":" #1 What are the recognized threats to the Bornean orangutan?\ndeforestation, palm oil plantations, and hunting\n#2 What are the recognized threats to the leopard cat?\nhabitat loss and hunting\n#3 Is deforestation, palm oil plantations, and hunting worse than habitat loss and hunting?\nno\nTherefore, the answer to the original question is True"}
{"prompt":"Question: Did Snoop Dogg refuse to make music with rival gang members?\nTake it step by step:","completion":" #1 What is the name of the gang that Snoop Dogg is part of?\nRollin' 20s Crips\n#2 Which gang is the rival of Rollin' 20s Crips?\nBloods\n#3 In Snoop Dogg's song California Vacation, which rapper did he collaborate with?\nNate Dogg\n#4 Is Nate Dogg not associated with Bloods?\nno\nTherefore, the answer to the original question is False"}
{"prompt":"Question: Does the density of helium cause voices to sound deeper?\nTake it step by step:","completion":" #1 What is the density of helium compared to air?\nlighter\n#2 As a result of lighter, what is the speed in which air travel throughs helium compared to air\nthree times that of air\n#3 When three times that of air happens, does the tone go deeper?\nno\nTherefore, the answer to the original question is False"}
{"prompt":"Question: Is Romeo and Juliet an unusual title to teach high schoolers?\nTake it step by step:","completion":" #1 What academic sources teach Romeo and Juliet?\nOxford, Cambridge and RSA\n#2 Are high schools included in Oxford, Cambridge and RSA?\nno\nTherefore, the answer to the original question is False"}
{"prompt":"Question: Are there multiple American government holidays during winter?\nTake it step by step:","completion":" #1 Through which period of the year does winter usually last in the US?\nMarch equinox\n#2 How many government holidays fall within the span of March equinox?\nNew Year's Day Independence Day Thanksgiving Day Christmas Day\n#3 Is New Year's Day Independence Day Thanksgiving Day Christmas Day considerably greater than one?\nno\nTherefore, the answer to the original question is True"}
{"prompt":"Question: Is Islamophobia against Cyprus majority religion misdirected?\nTake it step by step:","completion":" #1 What religion is targeted by Islamophobia?\nIslamic\n#2 What is the most common religion in Cyprus?\nChristianity\n#3 Is Islamic different than Christianity?\nyes\nTherefore, the answer to the original question is True"}
{"prompt":"Question: Have jokes killed more people than rats in history?\nTake it step by step:","completion":" #1 How many people have been killed by laughing to jokes?\nrare\n#2 Which diseases are spread by rats?\nbubonic plague, Lassa fever, leptospirosis, and Hantavirus infection\n#3 How many people have been killed by bubonic plague, Lassa fever, leptospirosis, and Hantavirus infection over time\n25 million (6th century outbreak) to 50 million people\n#4 Is rare greater than 25 million (6th century outbreak) to 50 million people?\nno\nTherefore, the answer to the original question is False"}
{"prompt":"Question: Will parma ham be ready for New Year's if the pig is slaughtered in December?\nTake it step by step:","completion":" #1 What is the minimum period of time required for parma ham to cure?\n12 months\n#2 How long is New Year's Day from December?\nJanuary\n#3 Is January greater than or equal to 12 months?\nno\nTherefore, the answer to the original question is False"}
{"prompt":"Question: Does Amtrak operate four wheel vehicles?\nTake it step by step:","completion":" #1 What kinds of vehicles does Amtrak use?\ndiesel locomotives and Amfleet coaches\n#2 Do any of diesel locomotives and Amfleet coaches have four wheels?\nyes\nTherefore, the answer to the original question is True"}
{"prompt":"Question: Does chlorine inhibit photosynthesis?\nTake it step by step:","completion":" #1 What does Chlorine prevent from growing in a pool?\nLegionella bacteria\n#2 Does Legionella bacteria do photosynthesis?\nyes\nTherefore, the answer to the original question is True"}
{"prompt":"Question: Do people who smoke Djarum's like cloves?\nTake it step by step:","completion":" #1 What are Djarum cigarettes made of?\nclove\n#2 Does clove include cloves?\nno\nTherefore, the answer to the original question is True"}
{"prompt":"Question: Is an astronomer interested in drosophila?\nTake it step by step:","completion":" #1 What do astronomers study?\na specific question or field outside the scope of Earth\n#2 What kind of entity is Drosophila?\na genus of flies\n#3 Is a genus of flies included in a specific question or field outside the scope of Earth?\nyes\nTherefore, the answer to the original question is False"}
{"prompt":"Question: Is Atlantic cod found in a vegemite sandwich?\nTake it step by step:","completion":" #1 To what taxonomic kingdom does the Atlantic cod belong?\nGadidae\n#2 What are the ingredients of Vegemite?\nleftover brewers' yeast extract with various vegetable and spice additives\n#3 Do any of leftover brewers' yeast extract with various vegetable and spice additives belong in Gadidae?\nno\nTherefore, the answer to the original question is False"}
{"prompt":"Question: Did Bruiser Brody wrestle on WWE Raw?\nTake it step by step:","completion":" #1 When did WWE Raw make its debut appearance?\nJanuary 11, 1993\n#2 When did wrestler Bruiser Brody's wrestling career come to an end?\nJuly 17, 1988\n#3 Is January 11, 1993 before July 17, 1988?\nno\nTherefore, the answer to the original question is False"}
{"prompt":"Question: Can the largest crustacean stretch out completely on a king-sized mattress?\nTake it step by step:","completion":" #1 What is the largest crustacean?\nJapanese spider crab\n#2 How long is the largest Japanese spider crab?\n3.7 metres\n#3 How long is a king-sized matress?\n180 cm\n#4 Is 3.7 metres smaller than 180 cm?\nno\nTherefore, the answer to the original question is False"}
{"prompt":"Question: Do Windows or Android smartphones run newer versions of Linux?\nTake it step by step:","completion":" #1 Which operating system do Windows smartphones run on?\nWindows 10 Mobile\n#2 Which operating system do android smartphones run on?\nLinux kernel\n#3 Is Windows 10 Mobile or Linux kernel Linux-based?\nno\nTherefore, the answer to the original question is False"}
{"prompt":"Question: Does Neville Longbottom have more courage as a child than as an adult?\nTake it step by step:","completion":" #1 Did Neville Longbottom's first appearances in the series show him to be very cowardly?\nhe is often portrayed as a bumbling, disorganised character and a rather mediocre student\n#2 Was he is often portrayed as a bumbling, disorganised character and a rather mediocre student's a child in the first few books of the Harry potter series?\nHarry discovers his innate talent for flying on broomsticks despite no prior experience, and is recruited into his House's team for Quidditch (a competitive wizards' sport sharing similarities to football, but played on flying broomsticks) as a Seeker. He also comes to dislike the school's Potions master, Severus Snape, who is also the Head of Slytherin House who acts with bias in favour of members of his House while perpetually looking for opportunities to fail Harry and his friends.\n#3 Was Neville Longbottom considered a hero by the end of the series?\nNeville, however, pulls the Sword of Gryffindor out of the Sorting Hat and uses it to behead Nagini\n#4 Was Neville, however, pulls the Sword of Gryffindor out of the Sorting Hat and uses it to behead Nagini's an adult in the final few books of the Harry potter series?\nbreaks free of the curse\n#5 Was he more courageous in Harry discovers his innate talent for flying on broomsticks despite no prior experience, and is recruited into his House's team for Quidditch (a competitive wizards' sport sharing similarities to football, but played on flying broomsticks) as a Seeker. He also comes to dislike the school's Potions master, Severus Snape, who is also the Head of Slytherin House who acts with bias in favour of members of his House while perpetually looking for opportunities to fail Harry and his friends. than breaks free of the curse?\nyes\nTherefore, the answer to the original question is False"}
{"prompt":"Question: Would Atlantic Salmon be within David Duchovny's dietary guidelines?\nTake it step by step:","completion":" #1 What kind of diet does David Duchovny follow?\npescetarian\n#2 What type of food is Atlantic Salmon?\nhealthy\n#3 Do people who follow pescetarian diets eat healthy?\nyes\nTherefore, the answer to the original question is True"}
{"prompt":"Question: Do people remember Lucille Ball's winemaking as successful?\nTake it step by step:","completion":" #1 What show was Lucille Ball a star of?\nI Love Lucy\n#2 On I Love Lucy, was Lucille's character successful in making wine?\nyes\nTherefore, the answer to the original question is False"}
{"prompt":"Question: Can a Sphynx cat be used for wool?\nTake it step by step:","completion":" #1 Which animals can wool be derived from?\nsheep\n#2 Is the Sphynx cat likely to be included in sheep?\nyes\nTherefore, the answer to the original question is False"}
{"prompt":"Question: Are classic nintendo games for emulator legal?\nTake it step by step:","completion":" #1 Who owns the copyright for classic Nintendo games?\nNES\n#2 Has NES issued any versions of classic Nintendo games for emulators?\nyes\nTherefore, the answer to the original question is False"}
{"prompt":"Question: Can you use the T-Mobile tuesdays app if you aren't a T-Mobile customer?\nTake it step by step:","completion":" #1 Who can use the T-Mobile tuesdays app?\nT-Mobile customers\n#2 Does T-Mobile allow use of the app if you aren't T-Mobile customers?\nno\nTherefore, the answer to the original question is False"}
{"prompt":"Question: Could Aretha Franklin vote for a president when her second child was born?\nTake it step by step:","completion":" #1 How old was Aretha Franklin when her second child was born?\n18\n#2 What is the minimum age required to vote in a U.S. election?\neighteen\n#3 Is eighteen lower than 18?\nno\nTherefore, the answer to the original question is False"}
{"prompt":"Question: Is Eighth Amendment to the United States Constitution popular in court?\nTake it step by step:","completion":" #1 How many cases have involved the 8th amendment?\nWoodson v. North Carolina\n#2 How many cases have involved the other amendments?\nfederal statutory or constitutional law\n#3 Is Woodson v. North Carolina the highest out of federal statutory or constitutional law?\nno\nTherefore, the answer to the original question is False"}
{"prompt":"Question: Did the Social Democratic Party of Germany help Frederick II become King of Prussia?\nTake it step by step:","completion":" #1 In what year was the Social Democratic Party of Germany founded?\n1863\n#2 In what year did Frederick II become King of Prussia?\n1772\n#3 Is 1863 before 1772?\nno\nTherefore, the answer to the original question is False"}
{"prompt":"Question: Would a Catholic priest commend someone's pride?\nTake it step by step:","completion":" #1 According to Catholic beliefs, what are the seven deadly sins?\npride, greed, wrath, envy, lust, gluttony, and sloth\n#2 Is pride excluded from pride, greed, wrath, envy, lust, gluttony, and sloth?\nno\nTherefore, the answer to the original question is False"}
{"prompt":"Question: Did Bill Gates help to develop the PlayStation 4?\nTake it step by step:","completion":" #1 Which organization does Bill Gate work for?\nMicrosoft Corporation\n#2 Which organization developed PlayStation 4?\nSony Interactive Entertainment\n#3 Is Microsoft Corporation the same as Sony Interactive Entertainment?\nno\nTherefore, the answer to the original question is False"}
{"prompt":"Question: Would a teacher still have their job if they called a black student an ape?\nTake it step by step:","completion":" #1 What kind of term would \"Ape\" be if used to describe a black person?\nAlaska Native\n#2 What standards are teachers held up to?\nclear standards of practice\n#3 If a teacher used Alaska Native, would they be upholding clear standards of practice?\nyes\nTherefore, the answer to the original question is False"}
{"prompt":"Question: Did compact discs make computer gaming more popular?\nTake it step by step:","completion":" #1 Which external storage device was previously popular before compact discs?\nFloppy disks\n#2 What features of compact disc made them much better than Floppy disks?\nStandard CDs have a diameter of 120 millimetres (4.7 in) and can hold up to about 80 minutes of uncompressed audio or about 700 MiB of data\n#3 What new possibilities did Standard CDs have a diameter of 120 millimetres (4.7 in) and can hold up to about 80 minutes of uncompressed audio or about 700 MiB of data create for computer games?\nhelped reduce software piracy\n#4 Did helped reduce software piracy lead to increased interest in computer games?\nyes\nTherefore, the answer to the original question is True"}
{"prompt":"Question: Do storks need golden toads to survive?\nTake it step by step:","completion":" #1 What is the most current population estimate of storks?\neight and six breeding species\n#2 What is the most current population estimate of golden toads?\n500\n#3 If storks exclusively ate golden toads, would 500 have been enough to sustain eight and six breeding species?\nyes\nTherefore, the answer to the original question is False"}
{"prompt":"Question: Are any letters directly before and after H missing from Roman numerals?\nTake it step by step:","completion":" #1 What is the letter before \"H\"?\nH\n#2 What is the letter after \"H\"?\nI\n#3 What are the Roman numerals? \na numeral system\n#4 Is it the case that not both H and I are in a numeral system?\nno\nTherefore, the answer to the original question is True"}
{"prompt":"Question: Did the Nazis use the Hammer and sickle flag?\nTake it step by step:","completion":" #1 Which symbol is featured in the Nazi flag?\nswastika\n#2 Is swastika a hammer and sickle symbol?\nyes\nTherefore, the answer to the original question is False"}
{"prompt":"Question: Are there enough Jonny Cash records in the world to give one to each French citizen?\nTake it step by step:","completion":" #1 How many Johnny Cash records have been sold?\nmore than 90 million\n#2 What is the population of France?\n67.08 million\n#3 Is more than 90 million greater than or equal to 67.08 million?\nno\nTherefore, the answer to the original question is True"}
{"prompt":"Question: Can monkeys use QWERTY keyboards?\nTake it step by step:","completion":" #1 What kind of keys are found on QWERTY keyboards?\noften-used keys farther apart increases typing speed, because it encourages alternation between the hands. There is another origin story in the Smithsonian that the QWERTY keyboard was made for telegraph operators and has this layout to make it easy for the telegraph operator to work. (On the other hand, in the German keyboard the Z has been moved between the T and the U to help type the frequent digraphs TZ and ZU in that language.) Almost every word in the English language contains at least one vowel letter, but on the QWERTY keyboard only the vowel letter \"A\" is on the home row\n#2 Can often-used keys farther apart increases typing speed, because it encourages alternation between the hands. There is another origin story in the Smithsonian that the QWERTY keyboard was made for telegraph operators and has this layout to make it easy for the telegraph operator to work. (On the other hand, in the German keyboard the Z has been moved between the T and the U to help type the frequent digraphs TZ and ZU in that language.) Almost every word in the English language contains at least one vowel letter, but on the QWERTY keyboard only the vowel letter \"A\" is on the home row be likened to buttons?\nby changing the software that interprets the keystrokes\n#3 Can monkeys be trained to push buttons?\nmonkeys must never be fully trusted with a human life\n#4 Are by changing the software that interprets the keystrokes and monkeys must never be fully trusted with a human life positive?\nno\nTherefore, the answer to the original question is True"}
{"prompt":"Question: Should children be kept from \"special brownies\"?\nTake it step by step:","completion":" #1 What are \"special brownies\" made from that makes them special?\ncannabis\n#2 Who is cannabis made specifically for?\nmedical purposes\n#3 Are children allowed to have things meant for medical purposes?\nno\nTherefore, the answer to the original question is True"}
{"prompt":"Question: Would Taylor Swift refer to Snoopy as oppa?\nTake it step by step:","completion":" #1 What is the minimum age difference that a Korean woman would use Oppa to address an older man?\nnuna\n#2 How old is Snoopy?\n1950\n#3 How old is Taylor Swift?\nDecember 13, 1989\n#4 What is 1950 minus December 13, 1989?\nyes\n#5 Is yes greater than or equal to nuna?\nno\nTherefore, the answer to the original question is True"}
{"prompt":"Question: Can horseradish be eaten in a religious context?\nTake it step by step:","completion":" #1 What are some commonly used traditional bitter herb items for the Seder held during the Passover?\nhorseradish and romaine lettuce\n#2 Is horseradish included in horseradish and romaine lettuce?\nno\nTherefore, the answer to the original question is True"}
{"prompt":"Question: Do hamsters provide food for any animals?\nTake it step by step:","completion":" #1 What types of animal are hamsters?\nrodents\n#2 Do rodents provide food for any other animals?\nyes\nTherefore, the answer to the original question is True"}
{"prompt":"Question: Will Chick-fil-A hypothetically refuse to sponsor a Pride parade?\nTake it step by step:","completion":" #1 Who founded Chick-fil-A?\nSamuel Truett Cathy\n#2 What religion was Samuel Truett Cathy?\nSouthern Baptist\n#3 What do pride parades typically celebrate?\nlesbian, gay, bisexual, transgender, and queer (LGBTQ) social and self acceptance, achievements, legal rights, and pride\n#4 Do Southern Baptist's oppose lesbian, gay, bisexual, transgender, and queer (LGBTQ) social and self acceptance, achievements, legal rights, and pride?\nno\nTherefore, the answer to the original question is True"}
{"prompt":"Question: Are the headquarters of All Nippon Airways near a beach?\nTake it step by step:","completion":" #1 Where city are the headquarters of All Nippon Airways?\nTokyo\n#2 What kind of development area is Tokyo?\nurban center\n#3 What is a beach characterized as?\na landform alongside a body of water\n#4 Do urban center areas typically have a landform alongside a body of water?\nyes\nTherefore, the answer to the original question is False"}
{"prompt":"Question: Does Evander Holyfield eat pork products?\nTake it step by step:","completion":" #1 What religion was Evander Holyfield?\n.\n#2 Does . allow eating pork?\nno\nTherefore, the answer to the original question is True"}
{"prompt":"Question: Could John Key issue an executive order in the USA?\nTake it step by step:","completion":" #1 Who can issue executive orders in the USA?\nthe president of the United States\n#2 What are the requirements to become the president of the United States?\nbe a natural-born citizen of the United States; be at least 35 years old; be a resident in the United States for at least 14 years\n#3 Does John Key satisfy all of be a natural-born citizen of the United States; be at least 35 years old; be a resident in the United States for at least 14 years?\nno\nTherefore, the answer to the original question is False"}
{"prompt":"Question: Can a Goblin shark hypothetically ride a bike if it had limbs?\nTake it step by step:","completion":" #1 What is the average weight of a goblin? \n3 and 4 m\n#2 What is the average weight a bike can hold? \n10.2 kg (22.5 lb)\n#3 Is 3 and 4 m less than 10.2 kg (22.5 lb)?\nno\nTherefore, the answer to the original question is False"}
{"prompt":"Question: Does a Trek 9000 require an anchor in order to park?\nTake it step by step:","completion":" #1 What kind of vehicle is the Trek 9000?\nfull suspension mountain bike\n#2 Does full suspension mountain bike need an anchor to park?\nno\nTherefore, the answer to the original question is False"}
{"prompt":"Question: Does Steven Spielberg's 1998 film take place in a period after War Horse setting?\nTake it step by step:","completion":" #1 What time period does War Horse take place in?\nbefore and during World War I\n#2 What years did before and during World War I take place in?\n1914 to 1918\n#3 What time period does Steven Spielberg's 1998 film take place in?\nWorld War II\n#4 When years did World War II take place in?\n1939 to 1945\n#5 Did 1939 to 1945 happen after 1914 to 1918?\nno\nTherefore, the answer to the original question is True"}
{"prompt":"Question: Is November a bad time for a photographer to take pictures of a plum tree in bloom?\nTake it step by step:","completion":" #1 What kind of tree is a plum tree?\nmedium-sized\n#2 What season will it be in temperate regions by November?\nspring\n#3 What do medium-sized do during spring\nWhen it flowers in the early spring\n#4 Considering When it flowers in the early spring, will a plum tree have an unattractive appearance at that time?\nyes\nTherefore, the answer to the original question is True"}
{"prompt":"Question: Do more Cauliflower grow in Arizona than California?\nTake it step by step:","completion":" #1 Which kind of climate favors the growth of Cauliflower?\ncool daytime temperatures\n#2 What kind of climate does Arizona have?\ndesert\n#3 What kind of weather does California have?\nMediterranean climate\n#4 Is cool daytime temperatures more similar to desert than Mediterranean climate?\nno\nTherefore, the answer to the original question is False"}
{"prompt":"Question: Would Jason Voorhees hypothetically fail at being a martyr?\nTake it step by step:","completion":" #1 What experience must one pass through in order to be considered a matyr?\npersecution and death\n#2 Can Jason Voorhes be killed?\nunstoppable\n#3 Would unstoppable being negative make Jason Voorhees unable to undergo persecution and death?\nyes\nTherefore, the answer to the original question is True"}
{"prompt":"Question: Could Palm Beach be held in the palm of your hand?\nTake it step by step:","completion":" #1 What is the total area of Palm Beach?\n8.12 sq mi\n#2 What is the maximum area that can be held on the palm of a human hand?\n8.4 litres\n#3 Is 8.12 sq mi greater than or equal to 8.4 litres?\nyes\nTherefore, the answer to the original question is False"}
{"prompt":"Question: Did Alfred Nobel write a banned book?\nTake it step by step:","completion":" #1 What literary works did Alfred Nobel write?\npoetry in English\n#2 Have any of the works listed in poetry in English been banned?\nno\nTherefore, the answer to the original question is True"}
{"prompt":"Question: Can a quarter fit inside of a human kidney?\nTake it step by step:","completion":" #1 How big is the largest kidney stone ever recorded?\n5 mm\n#2 How wide is a quarter?\n0.069 inches\n#3 Is 5 mm larger than 0.069 inches?\nno\nTherefore, the answer to the original question is True"}
{"prompt":"Question: Did Boris Yeltsin watch the 2008 Summer Olympics?\nTake it step by step:","completion":" #1 What were the date of the 2008 Summer Olympics?\n8 to 24 August 2008\n#2 When did Boris Yeltsin die?\n23 April 2007\n#3 is 23 April 2007 before 8 to 24 August 2008?\nyes\nTherefore, the answer to the original question is False"}
{"prompt":"Question: Does frost mean that it will be a snowy day?\nTake it step by step:","completion":" #1 How is frost formed?\nwater vapor in an above freezing atmosphere coming in contact with a solid surface whose temperature is below freezing\n#2 Does water vapor in an above freezing atmosphere coming in contact with a solid surface whose temperature is below freezing usually involve the falling of snow?\nno\nTherefore, the answer to the original question is False"}
{"prompt":"Question: Are there multiple Disney Zorro?\nTake it step by step:","completion":" #1 Which famous hero was featured in Disney's 1957 TV show?\nGuy Williams\n#2 What does 'The Fox' in Disney's 'The Fox and the Hound' translate to in Spanish?\nZorro\n#3 Do Guy Williams and Zorro refer to Zorro?\nyes\nTherefore, the answer to the original question is True"}
{"prompt":"Question: Does selling a 2020 Chevrolet Corvette almost pay for a year at Columbia University?\nTake it step by step:","completion":" #1 How much does a 2020 Chevrolet Corvette cost?\nCorvette\n#2 How much does a year at Columbia University cost?\n$50,526\n#3 Is Corvette almost as much as $50,526?\nno\nTherefore, the answer to the original question is True"}
{"prompt":"Question: Does the book Revolutionary Road give a glimpse at life in a suburb?\nTake it step by step:","completion":" #1 What location is the setting of the book Revolutionary Road?\nthe East Coast\n#2 Is the East Coast a suburb?\nno\nTherefore, the answer to the original question is True"}
{"prompt":"Question: Is the Liberty Bell still in its original location?\nTake it step by step:","completion":" #1 What was the original location of the Liberty Bell?\nthe steeple of the Pennsylvania State House\n#2 What is the current location of the Liberty Bell?\nLiberty Bell Center\n#3 Is Liberty Bell Center the same as the steeple of the Pennsylvania State House?\nno\nTherefore, the answer to the original question is False"}
{"prompt":"Question: Does Buddy The Elf know anyone who works in publishing?\nTake it step by step:","completion":" #1 Which people are known to the movie character Buddy The Elf?\nSanta's elves\n#2 Does any of Santa's elves work in publishing?\nyes\nTherefore, the answer to the original question is True"}
{"prompt":"Question: Is unanimously elected president's birthday a break for mail carriers?\nTake it step by step:","completion":" #1 Which US president was elected unanimously?\nWashington\n#2 When is Washington's birthday?\nFebruary 22, 1732\n#3 Is February 22, 1732 a break or holiday for the post office?\nno\nTherefore, the answer to the original question is True"}
{"prompt":"Question: Does a sea otter eat spiders?\nTake it step by step:","completion":" #1 What are sea otters known to feed on?\nmarine invertebrates\n#2 Are spiders included in marine invertebrates?\nno\nTherefore, the answer to the original question is False"}
{"prompt":"Question: Could a Bengal cat hypothetically best Javier Sotomayor's record?\nTake it step by step:","completion":" #1 How high is Javier Sotomayor's world record high jump?\n2.45 m (8 ft 1⁄4 in)\n#2 Which breed of cat can jump the highest?\ncaracal\n#3 If the average cat can jump up to 9 feet, then caracal can jump higher than what number?\nBengal cat as an active, inquisitive cat that loves to be up high. Most Bengals enjoy playing, chasing, climbing and investigating. In general, Bengals enjoy action. Bengals are generally confident and curious.\n#4 Is Bengal cat as an active, inquisitive cat that loves to be up high. Most Bengals enjoy playing, chasing, climbing and investigating. In general, Bengals enjoy action. Bengals are generally confident and curious. greater than 2.45 m (8 ft 1⁄4 in)?\nno\nTherefore, the answer to the original question is True"}
{"prompt":"Question: Are Chipotle Cinnamon Pork Chops appropriate for a Seder?\nTake it step by step:","completion":" #1 What kind of event is a Seder?\nritual feast\n#2 Which religious group observes ritual feast?\nJewish\n#3 Which foods are considered appropriate by the dietary restrictions imposed on Jewish?\ncertain types of mammals, birds and fish\n#4 What are the main ingredients of Chipotle Cinnamon Pork Chops?\na rib or part of a vertebra\n#5 Are a rib or part of a vertebra included in certain types of mammals, birds and fish?\nyes\nTherefore, the answer to the original question is False"}
{"prompt":"Question: Would the chef at Carmine's restaurant panic if there was no basil?\nTake it step by step:","completion":" #1 What kind of cuisine does Carmine's serve?\nRestaurant\n#2 Is basil an essential ingredient in Restaurant?\nno\nTherefore, the answer to the original question is True"}
{"prompt":"Question: Is most store bought rice pudding made with brown rice?\nTake it step by step:","completion":" #1 Which rice pudding is most commonly purchased in stores?\npudding rice\n#2 What color is pudding rice\nrice puddings grouped by place of origin\n#3 Which types of rice are commonly used to make rice pudding?\nhigh-starch short-grained\n#4 Is the one among high-starch short-grained having color of rice puddings grouped by place of origin brown rice?\nno\nTherefore, the answer to the original question is False"}
{"prompt":"Question: Did Easy Rider make a profit at the theater when it was released?\nTake it step by step:","completion":" #1 What was the budget of Easy Rider?\n$400,000\n#2 How much did Easy Rider earn upon its release?\n$60 million worldwide\n#3 Is $60 million worldwide greater than $400,000?\nno\nTherefore, the answer to the original question is True"}
{"prompt":"Question: Do mail carriers need multiple uniforms?\nTake it step by step:","completion":" #1 What seasons do mail carriers work through?\ndaylight or dark\n#2 In order to make it through all of daylight or dark, does one need different clothing pieces?\nno\nTherefore, the answer to the original question is True"}
{"prompt":"Question: Is Steve Martin someone who would refuse a dish of shrimp pasta?\nTake it step by step:","completion":" #1 What types of food is Steve Martin allergic to?\n. Martin came to public notice in the 1960s as a writer for The Smothers Brothers Comedy Hour\n#2 What type of food is shrimp?\ndecapod crustaceans\n#3 Is decapod crustaceans included in . Martin came to public notice in the 1960s as a writer for The Smothers Brothers Comedy Hour?\nno\nTherefore, the answer to the original question is True"}
{"prompt":"Question: As of 2020 have more women succeeded John Key than preceded him?\nTake it step by step:","completion":" #1 Which notable position did John Key occupy?\nPrime Minister of New Zealand\n#2 How many women served as Prime Minister of New Zealand before him?\nthree\n#3 How many women have served as Prime Minister of New Zealand after him?\nthree\n#4 Is three greater than three?\nno\nTherefore, the answer to the original question is False"}
{"prompt":"Question: Would Methuselah hypothetically hold a record in the Common Era?\nTake it step by step:","completion":" #1 Which period is referred to as the Common Era?\nCE) is one of the notation systems for the world's most widely used calendar era\n#2 Who is the oldest human whose age was well documented during CE) is one of the notation systems for the world's most widely used calendar era?\nJeanne Calment\n#3 How old was Jeanne Calment when she died?\n122 years, 164 days\n#4 How old was Methuselah when he died?\n969\n#5 Is 969 greater than 122 years, 164 days?\nno\nTherefore, the answer to the original question is True"}
{"prompt":"Question: Would you be likely to see storks at a baby shower?\nTake it step by step:","completion":" #1 What do storks represent?\nbringing babies to new parents\n#2 Do baby showers celebrate bringing babies to new parents?\nno\nTherefore, the answer to the original question is True"}
{"prompt":"Question: Can Viper Room concert hypothetically be held at National Diet building?\nTake it step by step:","completion":" #1 What is the capacity of the The Viper Room?\nThe Viper Room\n#2 What is the capacity of the National Diet Building?\n722\n#3 Is 722 greater than or equal to The Viper Room?\nyes\nTherefore, the answer to the original question is True"}
{"prompt":"Question: Can you get a fever from consuming meat?\nTake it step by step:","completion":" #1 What is a fever?\na temperature above the normal range due to an increase in the body's temperature set point\n#2 What can consuming uncooked meat cause?\nTrichinosis\n#3 Is a temperature above the normal range due to an increase in the body's temperature set point a symptom of Trichinosis?\nno\nTherefore, the answer to the original question is True"}
{"prompt":"Question: Did Ivan the Terrible use the Byzantine calendar?\nTake it step by step:","completion":" #1 What was Ivan the Terrible's role from 1530 to 1585?\nTsar of Russia\n#2 What country was Ivan the Terrible Tsar of Russia of?\nAll Rus'\n#3 Was the Byzantine calendar the official calendar of All Rus' from 1530 to 1585?\nno\nTherefore, the answer to the original question is True"}
{"prompt":"Question: Would a Rabbi celebrate Christmas?\nTake it step by step:","completion":" #1 What religion do Rabbis belong to?\nJudaism\n#2 Which religion celebrates Christmas?\nChristian\n#3 Is Judaism the same as Christian?\nno\nTherefore, the answer to the original question is False"}
{"prompt":"Question: Is clementine pith highly sought after?\nTake it step by step:","completion":" #1 What is a pith?\nthe pale, spongy inner layer of the rind\n#2 Do people usually like to keep the pale, spongy inner layer of the rind after peeling?\nno\nTherefore, the answer to the original question is False"}
{"prompt":"Question: Did the Nepalese Civil War take place near India?\nTake it step by step:","completion":" #1 Where did the Nepalese Civil War take place?\nNepal\n#2 Is Nepal near India?\nno\nTherefore, the answer to the original question is True"}
{"prompt":"Question: Can paratroopers be used in a vacuum?\nTake it step by step:","completion":" #1 What equipment do paratroopers use?\na parachute or parachutes\n#2 What does a parachute or parachutes need to create in order to function?\ndrag\n#3 In what does a parachute or parachutes create drag?\nInduced drag\n#4 Is Induced drag present in a vacuum?\nno\nTherefore, the answer to the original question is False"}
{"prompt":"Question: Could the moon fit inside the Black Sea?\nTake it step by step:","completion":" #1 What is the volume of the Black Sea?\n547,000 km3 (131,000 cu mi).\n#2 What is the volume of the moon?\n1,700 km\n#3 Is 547,000 km3 (131,000 cu mi). higher than 1,700 km?\nyes\nTherefore, the answer to the original question is False"}
{"prompt":"Question: Could R. Kelly write a college thesis?\nTake it step by step:","completion":" #1 What does writing a college thesis require a person be able to do?\nresearch and findings\n#2 What does R. Kelly claim to be?\nMusically Gifted\n#3 Can someone who is Musically Gifted do research and findings?\nyes\nTherefore, the answer to the original question is False"}
{"prompt":"Question: Can a chess board be converted to a Shogi board?\nTake it step by step:","completion":" #1 How many squares are on a chessboard?\n64\n#2 How many squares are on a Shogi board?\n81\n#3 Is 64 equal to 81?\nno\nTherefore, the answer to the original question is False"}
{"prompt":"Question: Has Cesar Millan ever tamed a short-eared dog?\nTake it step by step:","completion":" #1 Which kind of dogs does Cesar Millan's train?\nseverely aggressive\n#2 What are the social characteristics of the short-eared dog?\nsolitary\n#3 Does solitary match the characteristics of severely aggressive?\nno\nTherefore, the answer to the original question is False"}
{"prompt":"Question: Did the Eastern Orthodox Church and the Byzantine Empire ever use the same calendar?\nTake it step by step:","completion":" #1 What calendar did the Eastern Orthodox Church use from  c. 691 to 1728?\nJulian calendar\n#2 What calendar did the Byzantine Empire use from c. 988 to 1453?\nThe Byzantine calendar\n#3 Is Julian calendar and The Byzantine calendar the same?\nno\nTherefore, the answer to the original question is True"}
{"prompt":"Question: Were number of states in Ancient Greece underwhelming compared to US states in 1900?\nTake it step by step:","completion":" #1 How many states were in the United States in 1900?\n46\n#2 How many city-states were there in Ancient Greece?\nseveral hundred\n#3 Is several hundred less than 46?\nno\nTherefore, the answer to the original question is False"}
{"prompt":"Question: Is the rise of agriculture attributed to rivers?\nTake it step by step:","completion":" #1 What are the basic factors of agricultural production?\nplants and livestock\n#2 Do rivers provide any of plants and livestock?\nyes\nTherefore, the answer to the original question is True"}
{"prompt":"Question: Are goldfish more difficult to care for than isopods?\nTake it step by step:","completion":" #1 What is isopod care comparable to?\ndiet\n#2 What challenges do Goldfish pose to keepers?\ncompeting for food\n#3 Is diet easier to deal with than competing for food?\nyes\nTherefore, the answer to the original question is True"}
{"prompt":"Question: Does Mario use mushrooms to run faster?\nTake it step by step:","completion":" #1 In the Mario Universe what abilities do mushrooms give to Mario when collected?\nincreases Mario's size, turning him into \"Super Mario\", and allows him to break certain blocks\n#2 Is any of increases Mario's size, turning him into \"Super Mario\", and allows him to break certain blocks increased speed?\nyes\nTherefore, the answer to the original question is False"}
{"prompt":"Question: Can eating your weight in celery prevent diabetes?\nTake it step by step:","completion":" #1 If a person has diabetes, what is there body unable to process?\ninsulin\n#2 To prevent diabetes, what is the average amount of insulin an adult man should eat daily in grams?\n.\n#3 How much does the average male weigh in pounds?\n154–183\n#4 How many grams of sugar does a pound of celery have?\nCelery\n#5 Is 154–183 times Celery less than .?\nno\nTherefore, the answer to the original question is False"}
{"prompt":"Question: Do restaurants associate meatballs with the wrong country of origin?\nTake it step by step:","completion":" #1 In what country is the oldest evidence of people eating meatballs found?\nQin dynasty\n#2 What dish involving meatballs became popular in the United States after being invented in New York City in the 20th century?\nspaghetti\n#3 With which national cuisine do Americans typically associate spaghetti?\nItaly\n#4 Are Italy and Qin dynasty different?\nno\nTherefore, the answer to the original question is True"}
{"prompt":"Question: Would it be wise to bring a robusto into Central Park Zoo?\nTake it step by step:","completion":" #1 What is a robusto?\nA cigar\n#2 According to the rules, what can you not bring into The Central Park Zoo?\nsmoking\n#3 Is A cigar not in smoking?\nno\nTherefore, the answer to the original question is False"}
{"prompt":"Question: Were the Great Pyramids built by a theocratic government?\nTake it step by step:","completion":" #1 Who were the builders of the Great Pyramids?\nFourth Dynasty of the Old Kingdom of Ancient Egypt\n#2 How did Fourth Dynasty of the Old Kingdom of Ancient Egypt serve their leaders?\nofferings and prayers\n#3 Could offerings and prayers be described as a theocracy?\nyes\nTherefore, the answer to the original question is True"}
{"prompt":"Question: Are sesame seeds glued onto hamburger buns?\nTake it step by step:","completion":" #1 What do people usually do with hamburger buns?\nsesame seed\n#2 Can you sesame seed sesame seeds?\nyes\nTherefore, the answer to the original question is False"}
{"prompt":"Question: Was Snoop Dogg an adult when Tickle Me Elmo was popular?\nTake it step by step:","completion":" #1 In what year did Tickle Me Elmo become popular?\n1997\n#2 In what year was Snoop Dogg born?\n1971\n#3 What is the difference between 1997 and 1971?\nyes\n#4 Is yes greater than or equal to 18?\nno\nTherefore, the answer to the original question is True"}
{"prompt":"Question: Did James Watson's partner in studying the double helix outlive him? \nTake it step by step:","completion":" #1 Who did James Watson study the double helix with?\nFrancis Crick\n#2 How old was Francis Crick at their death?\n28 July 2004\n#3 How old is James Watson currently?\nKBE\n#4 Is 28 July 2004 greater than KBE?\nno\nTherefore, the answer to the original question is False"}
{"prompt":"Question: Can atheism surpass Christianity in American black communities by 2021?\nTake it step by step:","completion":" #1 What is the population of black Americans?\nabout 30 million\n#2 How many out of about 30 million follow a religion?\none half of one-percent\n#3 Is one half of one-percent close to or less than 50%?\nyes\nTherefore, the answer to the original question is False"}
{"prompt":"Question: Did the band Led Zeppelin own a prime number of gilded gramophones?\nTake it step by step:","completion":" #1 What award has a trophy which consists of a gilded gramophone?\nGrammy Award\n#2 How many Grammy Award have Led Zeppelin won?\nfour\n#3 Is four a prime number?\nno\nTherefore, the answer to the original question is True"}
{"prompt":"Question: Are Doctors of Homeopathy more likely than Doctors of Internal Medicine to recommend Quartz as a treatment?\nTake it step by step:","completion":" #1 What do doctors of homeopathy practice?\nhitting and\/or violently shaking the product\n#2 What is Quartz believed to have in hitting and\/or violently shaking the product?\nhealing powers\n#3 What do doctors of internal medicine study?\ninternal diseases\n#4 Are hitting and\/or violently shaking the product or healing powers not included in internal diseases?\nyes\nTherefore, the answer to the original question is True"}
{"prompt":"Question: Would it be difficult to host Stanley Cup Finals at Rock in Rio?\nTake it step by step:","completion":" #1 Which sport has the Stanley Cup Finals?\nNational Hockey League (NHL) playoff winner. It is the oldest existing trophy to be awarded to a professional sports franchise in North America, and the International Ice Hockey\n#2 Which kind of surface is required to play National Hockey League (NHL) playoff winner. It is the oldest existing trophy to be awarded to a professional sports franchise in North America, and the International Ice Hockey?\nice\n#3 What time of the year does Rock in Rio take place, and where?\n30 Anos\n#4 Do weather conditions in 30 Anos at that time not favor the formation of ice?\nyes\nTherefore, the answer to the original question is True"}
{"prompt":"Question: Would the trees in Auburn, New York be changing colors in September?\nTake it step by step:","completion":" #1 In the month of September, what season would it be in New York?\nsummer\n#2 Do trees change color during summer?\nyes\nTherefore, the answer to the original question is True"}
{"prompt":"Question: Could an elephant easily defeat a male macaque?\nTake it step by step:","completion":" #1 How much does a male macaques weigh?\n5.5 to 18 kg (12.13 to 39.7 lb).\n#2 How much can an elephant weigh?\n5.2–6.9 t\n#3 How tall is a male macaque?\n41 to 70 cm (16 to 28 inches)\n#4 How tall is an elephant?\n304–336 cm\n#5 Is 5.2–6.9 t more than 5.5 to 18 kg (12.13 to 39.7 lb). and is 304–336 cm more than 41 to 70 cm (16 to 28 inches)?\nno\nTherefore, the answer to the original question is True"}
{"prompt":"Question: Did Pedubastis I know Japanese people?\nTake it step by step:","completion":" #1 When did Pedubastis I die?\n804 BCE\n#2 When did the nation of Japan form?\nHan Dynasty\n#3 Is Han Dynasty before 804 BCE?\nno\nTherefore, the answer to the original question is False"}
{"prompt":"Question: Would a cattle farmer be useful to a drum maker?\nTake it step by step:","completion":" #1 Which animal products would a drum maker need?\nanimal hide\n#2 Are animal hide commonly obtained from cattle?\nyes\nTherefore, the answer to the original question is True"}
{"prompt":"Question: Can children be hurt by jalapeno peppers?\nTake it step by step:","completion":" #1 What do Jalapeno peppers contain?\n92% water, 6% carbohydrates, 1% protein\n#2 Can 92% water, 6% carbohydrates, 1% protein cause injuries to a child if they are not careful?\nno\nTherefore, the answer to the original question is True"}
{"prompt":"Question: Can Vice President of the United States kill with impunity?\nTake it step by step:","completion":" #1 What was the outcome of Vice President Aaron Burr's duel in July, 1804?\nHamilton's death\n#2 DidHamilton's death lead to loss of his opponent's life and did he continue his term afterwards?\nno\nTherefore, the answer to the original question is True"}
{"prompt":"Question: Can Amtrak's Acela Express break the sound barrier?\nTake it step by step:","completion":" #1 What is the maximum speed of Amtrak's Acela Express?\n150 mph\n#2 What is the minimum speed needed to break the sound barrier?\nMach 1\n#3 Is 150 mph greater than or equal to Mach 1?\nno\nTherefore, the answer to the original question is False"}
{"prompt":"Question: Are all characters in Legend of Robin Hood fictional?\nTake it step by step:","completion":" #1 Who is Robin Hood's main antagonist in the Legend of Robin Hood?\nSheriff of Nottingham\n#2 Who is Sheriff of Nottingham's employer?\nPrince John\n#3 Who is Prince John's brother who was usurped from the throne by him?\nKing Richard I\n#4 Are Prince John and King Richard I completely fictional characters?\nno\nTherefore, the answer to the original question is False"}
{"prompt":"Question: Are raw carrots better for maximizing vitamin A intake?\nTake it step by step:","completion":" #1 What is the source of Vitamin A in carrots?\nα- and β-carotenes\n#2 Is absorption of α- and β-carotenes reduced by cooking?\nno\nTherefore, the answer to the original question is False"}
{"prompt":"Question: Is radioactive waste a plot device for many shows?\nTake it step by step:","completion":" #1 What turned turtles into mutant turtles in Teenage Mutant Ninja Turtles?\ntoxic waste\n#2 Which substance gives the main characters of Family Guy superpowers?\nSuper Bowl XXXIII\n#3 Which substance gave Daredevil his super powers?\nradioactive\n#4 Are toxic waste. Super Bowl XXXIII and radioactive radioactive waste?\nyes\nTherefore, the answer to the original question is True"}
{"prompt":"Question: Could a firewall be destroyed by a hammer?\nTake it step by step:","completion":" #1 What enables firewall software to work on a computer?\nNPF\n#2 Can NPF be physically removed from a computer?\nNetwork-based firewalls are positioned on the gateway computers of LANs, WANs and intranets\n#3 Can a hammer do Network-based firewalls are positioned on the gateway computers of LANs, WANs and intranets?\nno\nTherefore, the answer to the original question is False"}
{"prompt":"Question: Can the President of Mexico vote in New Mexico primaries?\nTake it step by step:","completion":" #1 What is the citizenship requirement for voting in US states such as New Mexico?\neighteen years or older\n#2 What is the citizenship requirement of any President of Mexico?\nnatural-born\n#3 Is natural-born the same as eighteen years or older?\nyes\nTherefore, the answer to the original question is False"}
{"prompt":"Question: Would the operating system of a Samsung Galaxy 1 sound edible?\nTake it step by step:","completion":" #1 What are the operating systems of a Samsung Galaxy 1?\nAndroid\n#2 Does Android sound like something that is edible?\nyes\nTherefore, the answer to the original question is True"}
{"prompt":"Question: Does Metallica use Soulseek?\nTake it step by step:","completion":" #1 Does Soulseek enable users to illegally share music files?\nSoulseek claims to be against copyright violation\n#2 Does Metallica encourage illegal sharing of digital files?\nMetallica led the case against the peer-to-peer file sharing service Napster\n#3 Are the answers to Soulseek claims to be against copyright violation and Metallica led the case against the peer-to-peer file sharing service Napster the same?\nyes\nTherefore, the answer to the original question is False"}
{"prompt":"Question: Are monks forbidden from engaging in warfare?\nTake it step by step:","completion":" #1 What role did the Knights Templar play during the Crusades?\namong the most skilled fighting units\n#2 What role have Shaolin monks played at temples during conquests?\npatron saint\n#3 Did among the most skilled fighting units or patron saint not involve warfare?\nyes\nTherefore, the answer to the original question is False"}
{"prompt":"Question: Can a minotaur hypothetically injure a tibia playing football?\nTake it step by step:","completion":" #1 What is the body structure of a Minotaur?\nthe body of a man\n#2 Where in the human body is the tibia located?\nmedial side of the leg\n#3 Does the body of a man account for the presence of medial side of the leg in a Minotaur?\n\n#4 Are injuries to medial side of the leg common during football?\nIt is more common in athletes\n#5 Are  and It is more common in athletes positive\nno\nTherefore, the answer to the original question is True"}
{"prompt":"Question: Did Columbus obtain his funding from the rulers of the Portugese Empire?\nTake it step by step:","completion":" #1 Which major voyage did Columbus require funding to embark upon?\nfourth voyage\n#2 Who funded fourth voyage?\nQueen Isabella I and King Ferdinand II\n#3 Which kingdoms did Queen Isabella I and King Ferdinand II rule over?\nSpain\n#4 Is the Portuguese Empire included in Spain?\nno\nTherefore, the answer to the original question is False"}
{"prompt":"Question: Do shrimp taste best when cooked for a long time?\nTake it step by step:","completion":" #1 What happens when shrimp is cooked for a long time?\nthey have a tough and rubbery texture\n#2 What is the ideal texture for shrimp?\nlight and fragrant\n#3 Are they have a tough and rubbery texture and light and fragrant the same?\nno\nTherefore, the answer to the original question is False"}
{"prompt":"Question: Would a birdwatcher pursue their hobby at a Philadelphia Eagles game?\nTake it step by step:","completion":" #1 What is a birdwwatcher interested in watching?\npublic webcams\n#2 What kind of sport does the Philadelphia eagles play?\nAmerican football\n#3 Can public webcams be found at American football?\nyes\nTherefore, the answer to the original question is False"}
{"prompt":"Question: Is Cantonese spoken in Japan?\nTake it step by step:","completion":" #1 Where is Cantonese widely spoken?\nVietnam\n#2 Is Japan included in Vietnam?\nno\nTherefore, the answer to the original question is False"}
{"prompt":"Question: Do ants outperform apes on language ability?\nTake it step by step:","completion":" #1 What faculties are required for language?\nhuman\n#2 Which of human do ants possess?\nhymenopteran groups\n#3 Which of human do apes possess?\nImitation\n#4 Does hymenopteran groups have more overlap with human than Imitation does?\nyes\nTherefore, the answer to the original question is False"}
{"prompt":"Question: Would Christopher Hitchens be very unlikely to engage in tonsure?\nTake it step by step:","completion":" #1 What were Christopher Hitchens' views on religion?\nantitheist\n#2 What is the purpose of tonsure?\na sign of religious devotion or humility\n#3 Would a proponent of antitheist have a negative opinion of a sign of religious devotion or humility?\nyes\nTherefore, the answer to the original question is True"}
{"prompt":"Question: Is menthol associated with Christmas?\nTake it step by step:","completion":" #1 What is a popular candy flavor during Christmas?\npeppermint\n#2 Is menthol an ingredient in peppermint?\nyes\nTherefore, the answer to the original question is True"}
{"prompt":"Question: Does Snoop Dogg advocate a straight edge lifestyle?\nTake it step by step:","completion":" #1 What is the position of the straight edge advocates on recreational drugs?\nrefrain\n#2 What is Snoop Dogg's position on recreational drugs?\navowed cannabis smoker\n#3 Is refrain the same as avowed cannabis smoker?\nno\nTherefore, the answer to the original question is False"}
{"prompt":"Question: Is it expected that Charla Nash would be anxious near a gorilla?\nTake it step by step:","completion":" #1 Which animal attacked Charla Nash in 2009?\nTravis\n#2 Does Travis bear significant similarity to a gorilla?\nno\nTherefore, the answer to the original question is True"}
{"prompt":"Question: Should oysters be avoided by people with ADHD?\nTake it step by step:","completion":" #1 Which metal are oysters are known to be an excellent source of?\nzinc\n#2 Is the consumption of zinc known to worsen symptoms of ADHD?\nno\nTherefore, the answer to the original question is False"}
{"prompt":"Question: Does Magnus Carlsen enjoy KFC?\nTake it step by step:","completion":" #1 What country is Magnus Carlsen from?\nNorwegian\n#2 In what countries does KFC have a location?\n136\n#3 Is Norwegian included in 136?\nno\nTherefore, the answer to the original question is False"}
{"prompt":"Question: Would a packed Wembley stadium be likely to have a descendant of the Mongols inside?\nTake it step by step:","completion":" #1 What is the capacity of the Wembley stadium?\n90,000 seats\n#2 Who is the founder of the Mongol empire?\nGenghis Khan\n#3 What is the minimum number of men within which at least one descendant of Genghis Khan is found?\n16 million\n#4 Is 90,000 seats divided by 16 million greater than or equal to one?\nyes\nTherefore, the answer to the original question is True"}
{"prompt":"Question: Is Oculudentavis more dangerous than Allosaurus?\nTake it step by step:","completion":" #1 What were the characteristics of the Oculudentavis?\navialan dinosaur\n#2 What were the characteristics of the Allosaurus?\nlarge bipedal predator\n#3 Are avialan dinosaur more likely to cause harm than large bipedal predator?\nyes\nTherefore, the answer to the original question is False"}
{"prompt":"Question: Would James Cotton's instrument be too strident for a smooth jazz band?\nTake it step by step:","completion":" #1 What instument is James Cotton known for?\nharmonica playing\n#2 What instuments are used to play Smooth Jazz?\nmelodic form\n#3 Is harmonica playing not  one of melodic form?\nno\nTherefore, the answer to the original question is True"}
{"prompt":"Question: Are there tearjerkers about United Airlines flights?\nTake it step by step:","completion":" #1 What do tearjerkers refer to?\nsomething that provokes sadness or pathos\n#2 Which United Airlines flight was involved in a terrorist attack in 2001?\n175\n#3 Are there any something that provokes sadness or pathos in memory of the passengers of 175?\nyes\nTherefore, the answer to the original question is True"}
{"prompt":"Question: Would a rabbi worship martyrs Ranavalona I killed?\nTake it step by step:","completion":" #1 Which religion are rabbis teachers of?\nJudaism\n#2 Which religion were the matyrs killed by Ranavalona I adherents of?\nChristianity\n#3 Do adherent of Judaism worship matyrs like those of Christianity?\nno\nTherefore, the answer to the original question is False"}
{"prompt":"Question: Does Mercury help detect coronavirus?\nTake it step by step:","completion":" #1 What are the basic symptoms of coronavirus?\nfever, cough, rhinitis, sore throat, hoarseness, bronchitis, bronchiolitis, pneumonia, and croup\n#2 Which instrument is used to measure a symptom among fever, cough, rhinitis, sore throat, hoarseness, bronchitis, bronchiolitis, pneumonia, and croup that can be measured?\nthermometer\n#3 Does a type of thermometer use mercury?\nyes\nTherefore, the answer to the original question is True"}
{"prompt":"Question: Was The Jackson 5 bigger family band than The Isley Brothers?\nTake it step by step:","completion":" #1 How many albums has the Jackson 5 sold?\nmore than 100 million\n#2 How many albums has the Eisley Brothers sold?\nover 18 million\n#3 How many people were in the Jackson 5?\n5\n#4 How many people made up the Eisley Brothers?\nsix\n#5 Is more than 100 million greater than over 18 million and is 5 greater than six?\nyes\nTherefore, the answer to the original question is True"}
{"prompt":"Question: Does a Starbucks passion tea have ginger in it?\nTake it step by step:","completion":" #1 What ingredients are in the Starbucks Passion Tea?\nSarbucks\n#2 Is ginger part of Sarbucks?\nno\nTherefore, the answer to the original question is False"}
{"prompt":"Question: Do Shivambu practitioners believe ammonia is unhealthy?\nTake it step by step:","completion":" #1 What is another term for Shivambu?\nurotherapy\n#2 What did urotherapy believe could have healing properties?\nurine\n#3 Is urine void of ammonia?\nno\nTherefore, the answer to the original question is False"}
{"prompt":"Question: Can eating grapefruit kill besides allergies or choking?\nTake it step by step:","completion":" #1 What health risks associated with eating grapefruit could lead to death?\ndrug overdose toxicity\n#2 Is drug overdose toxicity more than just allergy and choking?\nno\nTherefore, the answer to the original question is True"}
{"prompt":"Question: Should someone prone to jealousy be in a polyamorous relationship?\nTake it step by step:","completion":" #1 What kind of relationship would a polyamorous person engage in?\nintimate relationships with more than one partner, with the informed consent of all partners involved. It has been described as \"consensual, ethical, and responsible non-monogamy\". People who identify as polyamorous believe in an open relationship\n#2 Would a jealous person be comfortable with intimate relationships with more than one partner, with the informed consent of all partners involved. It has been described as \"consensual, ethical, and responsible non-monogamy\". People who identify as polyamorous believe in an open relationship?\nno\nTherefore, the answer to the original question is False"}
{"prompt":"Question: Would early Eastern Canadian Natives language have use of the letter B?\nTake it step by step:","completion":" #1 What language did Eastern Canadian Natives speak?\nInuktitut\n#2 What kind of language is Inuktitut?\naboriginal\n#3 Does aboriginal involve the use of letters?\nyes\nTherefore, the answer to the original question is False"}
{"prompt":"Question: During the pandemic, is door to door advertising considered inconsiderate?\nTake it step by step:","completion":" #1 What does door to door advertising involve a person to do?\nwalk from the door of one house to the door of another\n#2 During the COVID-19 pandemic, what does the CDC advise people to do in terms of traveling?\nwear cloth face coverings\n#3 During the COVID-19 pandemic, what does the CDC advise people to do in terms of interaction with others?\nsocial distancing\n#4 Does doing walk from the door of one house to the door of another go against wear cloth face coverings and social distancing?\nyes\nTherefore, the answer to the original question is True"}
{"prompt":"Question: Is Mickey Mouse hypothetically unlikely to make a purchase at Zazzle?\nTake it step by step:","completion":" #1 What clothing pieces does Micky Mouse typically wear?\nred shorts, large yellow shoes, and white gloves\n#2 What clothing pieces does Zazzle specialize in?\nretail apparel\n#3 Is there no overlap between red shorts, large yellow shoes, and white gloves and retail apparel?\nyes\nTherefore, the answer to the original question is True"}
{"prompt":"Question: Is Maruti Suzuki Baleno an efficient car for Linus Torvald's family?\nTake it step by step:","completion":" #1 How many people can sit in a  Maruti Suzuki Baleno?\nOnly one\n#2 How many people are in Linus Torvald's family?\nthree\n#3 Is Only one at least equal or greater than three?\nno\nTherefore, the answer to the original question is True"}
{"prompt":"Question: Is Benjamin Franklin a prime candidate to have his statues removed by Black Lives Matter movement?\nTake it step by step:","completion":" #1 What social issue motivates the Black Lives Matter movement?\nracial justice\n#2 Did Benjamin Franklin act against achieving racial justice?\nyes\nTherefore, the answer to the original question is True"}
{"prompt":"Question: Is ID required to get all medications from all pharmacies?\nTake it step by step:","completion":" #1 Which category of medications usually require an ID for pickup?\nprescription drugs\n#2 What are the regulations guiding prescription drugs across states in the US?\nThe Uniform Controlled Substances Act\n#3 Are The Uniform Controlled Substances Act the same across all states?\nno\nTherefore, the answer to the original question is False"}
{"prompt":"Question: Is Fiat Chrysler gaining a new overall corporate identity?\nTake it step by step:","completion":" #1 What plans are underway as regards naming after the completion of the Fiat Chrysler merger?\ngroup branding\n#2 Does group branding involve a change of the collective corporate identity?\nyes\nTherefore, the answer to the original question is True"}
{"prompt":"Question: Did Disney get most of Rudyard Kipling's The Jungle Book profits?\nTake it step by step:","completion":" #1 When did Rudyard Kipling write \"The Jungle Book\"?\n1894\n#2 The 1967 and 2016 adaptations of the book was produced by which media company?\nWalt Disney Pictures\n#3 When did Walt Disney Pictures produce these movies?\n2003\n#4 Is 2003 several decades after 1894 and Walt Disney Pictures the same as Disney?\nno\nTherefore, the answer to the original question is True"}
{"prompt":"Question: Does an organ donor need to be dead to donate a kidney?\nTake it step by step:","completion":" #1 How many kidneys does the average person have?\n12\n#2 How many kidneys does a person require to function?\none\n#3 Is 12 the same as one?\nno\nTherefore, the answer to the original question is False"}
{"prompt":"Question: Would Kelly Clarkson's voice shake glass?\nTake it step by step:","completion":" #1 At what note would glass start to vibrate?\nresonant frequency) Friction idiophones, such as making a glass object (glass, bottle, vase) vibrate by rubbing around its rim with a fingertip\n#2 In Kelly Clarkson's song Never Enough, what key is the song sung in?\nG minor\n#3 Is G minor above resonant frequency) Friction idiophones, such as making a glass object (glass, bottle, vase) vibrate by rubbing around its rim with a fingertip?\nno\nTherefore, the answer to the original question is True"}
{"prompt":"Question: Is a railroad engineer needed during NASCAR events?\nTake it step by step:","completion":" #1 On what kind of transportation do railroad engineers work?\nlocomotive\n#2 NASCAR involves what kind of transportation?\nstock-car\n#3 Is locomotive and stock-car the same?\nno\nTherefore, the answer to the original question is False"}
{"prompt":"Question: Can crane slamdunk?\nTake it step by step:","completion":" #1 What is a slamdunk?\na type of basketball shot\n#2 What body parts are needed to perform a type of basketball shot?\none or both hands\n#3 Do cranes have one or both hands?\nyes\nTherefore, the answer to the original question is False"}
{"prompt":"Question: Did the Qwerty keyboard layout predate computers?\nTake it step by step:","completion":" #1 When was the QWERTY keyboard layout developed?\n1873\n#2 When was the modern computer invented?\n1970s\n#3 Is 1873 before 1970s?\nno\nTherefore, the answer to the original question is True"}
{"prompt":"Question: Would Alexander Hamilton have known about koalas?\nTake it step by step:","completion":" #1 When were Koalas first sighted?\n26 January 1798\n#2 When did Alexander Hamilton die?\nJuly 12, 1804\n#3 Is 26 January 1798 before July 12, 1804?\nno\nTherefore, the answer to the original question is False"}
{"prompt":"Question: Will the torso be safe from blows to the largest and smallest bones in body?\nTake it step by step:","completion":" #1 Which part of the human body is the torso?\nthe central part or core\n#2 Which is the largest and smallest bone in the human body?\nfemur or thigh-bone\n#3 Where are femur or thigh-bone located?\nhip musculature\n#4 Is any of hip musculature part of the central part or core?\nno\nTherefore, the answer to the original question is True"}
{"prompt":"Question: Does the Dalai Lama believe in the divine barzakh?\nTake it step by step:","completion":" #1 What religion contains the concept of the divine barzakh?\nJudaism\n#2 Is the Dalai Lama a member of Judaism?\nyes\nTherefore, the answer to the original question is False"}
{"prompt":"Question: Is Pig Latin related to real Latin?\nTake it step by step:","completion":" #1 Which language is Pig Latin based on?\nEnglish\n#2 Is English Latin?\nno\nTherefore, the answer to the original question is False"}
{"prompt":"Question: Would Woodrow Wilson support Plessy v. Ferguson decision?\nTake it step by step:","completion":" #1 What was the topic of Plessy v. Ferguson?\nracial segregation laws for public facilities\n#2 Does Woodrow Wilson's veiws on racial segregation laws for public facilities agree more with Plessy or Ferguson?\nmilitary policy from the Civil War through the Second World War\n#3 Who did the court rule in favor of in Plessy v. Ferguson?\nracial segregation laws\n#4 Are military policy from the Civil War through the Second World War and racial segregation laws the same?\nno\nTherefore, the answer to the original question is True"}
{"prompt":"Question: Would a Bulgarian priest eat a four-course meal on Christmas Eve?\nTake it step by step:","completion":" #1 Is the number of dishes served at a Bulgarian Christmas Eve meal odd or even?\nodd\n#2 Is the number \"four\" odd or even?\neven\n#3 Is odd the same as even?\nno\nTherefore, the answer to the original question is False"}
{"prompt":"Question: Is Route 66 generally unknown to Americans?\nTake it step by step:","completion":" #1 In what hit song was Route 66 mentioned?\n\"(Get Your Kicks on) Route 66\n#2 Is \"(Get Your Kicks on) Route 66 a little-known song in America?\nno\nTherefore, the answer to the original question is False"}
{"prompt":"Question: Did the Berlin Wall prevent any athletes from competing in the 1936 Summer Olympics?\nTake it step by step:","completion":" #1 When were the 1936 Olympics?\n1936 in Berlin, Germany\n#2 When was the Berlin Wall built?\n1961\n#3 Did 1961 occur before 1936 in Berlin, Germany?\nno\nTherefore, the answer to the original question is False"}
{"prompt":"Question: Are the Vietnamese people a great untapped resource for NBA players?\nTake it step by step:","completion":" #1 What is the average height of NBA players?\njust under 6 feet 7 inches\n#2 What is the average height of Vietnamese males?\nVietnamese and Thai people.\n#3 Is Vietnamese and Thai people. close to being the same as just under 6 feet 7 inches?\nno\nTherefore, the answer to the original question is False"}
{"prompt":"Question: Will every resident of Los Angeles County, California go to Jehovah Witnesses's heaven?\nTake it step by step:","completion":" #1 What is the estimated population of Los Angeles County, California?\n9,818,605\n#2 According to the Jehovah's Witnesses, how many people will go to heaven?\n144,000\n#3 Is 9,818,605 less than or equal to 144,000?\nno\nTherefore, the answer to the original question is False"}
{"prompt":"Question: Do Australians ride Kangaroos to work?\nTake it step by step:","completion":" #1 Do kangaroos live freely with people?\nThere are very few records of kangaroos attacking humans without provocation\n#2 Are there any kangaroo parking lots in Australia?\nShopping malls, sports stadiums, megachurches and similar venues often feature parking lots of immense area.\n#3 Is There are very few records of kangaroos attacking humans without provocation or Shopping malls, sports stadiums, megachurches and similar venues often feature parking lots of immense area. positive?\nyes\nTherefore, the answer to the original question is False"}
{"prompt":"Question: Did origin dynasty of Go precede Jia Sidao?\nTake it step by step:","completion":" #1 During which Chinese dynasty did the game Go originate?\nEastern Han\n#2 Which Chinese dynasty was Jia Sidao a part of during his lifetime?\nSong dynasty\n#3 Did Eastern Han precede Song dynasty?\nno\nTherefore, the answer to the original question is True"}
{"prompt":"Question: Are there multiple Star Wars TV shows produced by Disney?\nTake it step by step:","completion":" #1 When did Disney acquire Star Wars?\n2012\n#2 How many Star Wars TV shows have been produced since 2012?\nTwelve\n#3 Is Twelve greater than one?\nno\nTherefore, the answer to the original question is True"}
{"prompt":"Question: Would Emma Roberts's Nancy Drew be considered a private investigator?\nTake it step by step:","completion":" #1 Who did Emma Roberts play in the 2007 film titled Nancy Drew?\nNancy Drew\n#2 Was Nancy Drew considered a private investigator?\nno\nTherefore, the answer to the original question is False"}
{"prompt":"Question: Was the AK-47 used in the Seven Years' War?\nTake it step by step:","completion":" #1 Between what years did the Seven Years' War take place?\n1756 and 1763\n#2 When was the AK-47 developed?\n1945\n#3 Is 1945 before 1756 and 1763?\nno\nTherefore, the answer to the original question is False"}
{"prompt":"Question: Did Helen Keller ever read a novel by J. K. Rowling?\nTake it step by step:","completion":" #1 When was J. K. Rowling's first novel published?\n1997\n#2 When did Helen Keller die?\nJune 1, 1968\n#3 Is 1997 before June 1, 1968?\nno\nTherefore, the answer to the original question is False"}
{"prompt":"Question: Would Garfield like canid food?\nTake it step by step:","completion":" #1 What is Garfield's favorite food?\nlasagna\n#2 Is the answer to lasagna a type of canned food?\nno\nTherefore, the answer to the original question is False"}
{"prompt":"Question: Did Hamlet's author use email?\nTake it step by step:","completion":" #1 Who was the author of Hamlet?\nWilliam Shakespeare\n#2 When did William Shakespeare pass away?\n23 April 1616\n#3 When did email become commonly used?\n1971\n#4 Did 1971 occur before 23 April 1616?\nno\nTherefore, the answer to the original question is False"}
{"prompt":"Question: Can Larry King's ex-wives form a water polo team?\nTake it step by step:","completion":" #1 How many ex wives does Larry King have?\nseven\n#2 How many players  are on a water polo team?\nsix\n#3 Is seven equal to six?\nno\nTherefore, the answer to the original question is True"}
{"prompt":"Question: Are a dozen pickles good for easing hypertension?\nTake it step by step:","completion":" #1 What nutrients cause hypertension?\nExcessive sodium or insufficient potassium\n#2 Are pickles low in Excessive sodium or insufficient potassium?\nyes\nTherefore, the answer to the original question is False"}
{"prompt":"Question: Was Florence Nightingale's death more painful than Saint Peter's?\nTake it step by step:","completion":" #1 How did Saint Peter die?\ncrucifixion\n#2 How did Florence Nightingale die?\npeacefully in her sleep\n#3 Can peacefully in her sleep be considered more painful than crucifixion?\nyes\nTherefore, the answer to the original question is False"}
{"prompt":"Question: Would Iceland lose to Amazon in a bidding war?\nTake it step by step:","completion":" #1 What was the nominal GDP of Iceland in 2018?\nUS$27bn\n#2 What was Amazon's recorded revenues in 2018?\nUS$232.887 billion\n#3 Is US$232.887 billion greater than US$27bn?\nno\nTherefore, the answer to the original question is True"}
{"prompt":"Question: Could boolean algebra be described as binary?\nTake it step by step:","completion":" #1 How many digits are used in boolean algebra?\n1 and 0\n#2 How many does 'binary' denote?\ntwo\n#3 Is 1 and 0 the same as two?\nno\nTherefore, the answer to the original question is True"}
{"prompt":"Question: Could a Jujutsu expert hypothetically defeat a Janissary?\nTake it step by step:","completion":" #1 What equipment does Jujutsu use?\neither a short weapon or bare hands\n#2 What equipment does Janissary use?\nfirearms\n#3 Would someone with either a short weapon or bare hands likely defeat someone with firearms?\nyes\nTherefore, the answer to the original question is False"}
{"prompt":"Question: Does the JPEG acronym stand for a joint committee?\nTake it step by step:","completion":" #1 What does the acronym JPEG represent?\nJoint Photographic Experts Group\n#2 Is Joint Photographic Experts Group a coalition of different groups?\nno\nTherefore, the answer to the original question is True"}
{"prompt":"Question: Did Mike Tyson train to use the gogoplata?\nTake it step by step:","completion":" #1 In what sports is a gogoplata used?\nmixed martial arts\n#2 Did Mike Tyson participate in mixed martial arts?\nyes\nTherefore, the answer to the original question is False"}
{"prompt":"Question: Was the Mentalist filmed in black and white?\nTake it step by step:","completion":" #1 When did The Mentalist first air?\nSeptember 23, 2008\n#2 When did they stop filming black and white television?\nlate 80s to early 90s\n#3 Was September 23, 2008 before late 80s to early 90s?\nno\nTherefore, the answer to the original question is False"}
{"prompt":"Question: Would the Ku Klux Klan welcome Opal Tometi into their group?\nTake it step by step:","completion":" #1 Which groups of people are enemies of the Ku Klux Klan?\nAfrican Americans\n#2 What is Opal Tometi's ethnicity?\nNigerian-American\n#3 Is Nigerian-American absent from African Americans?\nyes\nTherefore, the answer to the original question is False"}
{"prompt":"Question: Can an emu chase a bogan?\nTake it step by step:","completion":" #1 Where are emus endemic to?\nAustralia\n#2 Where is a \"bogan\" found?\nAustralia and New Zealand\n#3 Do areas Australia and Australia and New Zealand overlap?\nyes\nTherefore, the answer to the original question is True"}
{"prompt":"Question: Is calling ABBA the Swedish Beatles a preposterous claim?\nTake it step by step:","completion":" #1 How many Billboard number ones did ABBA have?\nthree\n#2 How many Billboard number ones did the Beatles have?\n132\n#3 Is three lower than 132?\nno\nTherefore, the answer to the original question is True"}
{"prompt":"Question: Did Jane Austen suffer from middle child syndrome?\nTake it step by step:","completion":" #1 What would a child have to be to suffer from middle child syndrome?\nmiddle children, due directly to their placement in their family's birth order\n#2 What is Jane Austen's position among her siblings?\nolder\n#3 Does being older make her middle children, due directly to their placement in their family's birth order?\nno\nTherefore, the answer to the original question is False"}
{"prompt":"Question: Would a pacifist be opposed to hunting?\nTake it step by step:","completion":" #1 What is the purpose of hunting?\nmeat, recreation\n#2 What are Pacifists opposed to?\nwar, militarism or violence\n#3 Is war, militarism or violence listed in meat, recreation?\nno\nTherefore, the answer to the original question is False"}
{"prompt":"Question: Is a person with St. Vitus's Dance likely to win a ballet competition?\nTake it step by step:","completion":" #1 What are the characteristic movements of St. Vitus' Dance?\nchorea\n#2 What are the characteristic movements of well trained ballet dancers?\nport de bras and the épaulement\n#3 Is chorea the same as port de bras and the épaulement?\nno\nTherefore, the answer to the original question is False"}
{"prompt":"Question: Would a retail associate envy the retailer's CEO's pay?\nTake it step by step:","completion":" #1 How much does a retail CEO make yearly?\n$216,000\n#2 How much does a retail associate make yearly?\n$10.10\n#3 Is $216,000 greater than $10.10?\nno\nTherefore, the answer to the original question is True"}
{"prompt":"Question: Are there people who are men who experience menstruation?\nTake it step by step:","completion":" #1 What body organs are involved in menstruation?\nthe inner lining of the uterus through the vagina\n#2 Do some men possess the inner lining of the uterus through the vagina? \nno\nTherefore, the answer to the original question is True"}
{"prompt":"Question: Was disc jockey Jay Thomas enemies with Clayton Moore?\nTake it step by step:","completion":" #1 Did Jay Thomas appear on the David Letterman Show?\nannual Christmas appearances\n#2 Did Jay Thomas tell a story about Clayton Moore who is the Lone Ranger?\nhe told a true story about how he met Moore\n#3 Is the story a humorous story?\n\"I didn't know it was you!\"\n#4 Is annual Christmas appearances, he told a true story about how he met Moore or \"I didn't know it was you!\" a no answer?\nyes\nTherefore, the answer to the original question is False"}
{"prompt":"Question: Should cactus soil always be damp?\nTake it step by step:","completion":" #1 What are the factors that determine the amount of water a cactus needs?\nwhere the cacti are being grown, the nature of the growing medium, and the original habitat of the cacti\n#2 Are where the cacti are being grown, the nature of the growing medium, and the original habitat of the cacti always constant?\nno\nTherefore, the answer to the original question is False"}
{"prompt":"Question: Does the United States Department of Education oversee services benefiting undocumented migrants? \nTake it step by step:","completion":" #1 Which service does the United States Department of Education oversee?\nfederal assistance to education\n#2 Which services could children from undocumented migrant families benefit from?\nacademic and supportive\n#3 Is federal assistance to education included in academic and supportive?\nyes\nTherefore, the answer to the original question is True"}
{"prompt":"Question: Does Soylent use Pea for their source of protein? \nTake it step by step:","completion":" #1 What type of protein does Soylent use?\nsoy\n#2 Is soy the same as pea protein?\nyes\nTherefore, the answer to the original question is False"}
{"prompt":"Question: Are Brian Cranston and Saoirse Ronan's combined Emmy Awards a prime number?\nTake it step by step:","completion":" #1 How many Emmy Awards has Brian Cranston won?\nthird\n#2 How many Emmy Awards has Saoirse Ronan won?\nfour\n#3 What is third plus four?\nno\n#4 Is no not evenly divisible by any other number than 1 and no?\nno\nTherefore, the answer to the original question is False"}
{"prompt":"Question: Do beeswax alternatives to cling wrap use plsatic?\nTake it step by step:","completion":" #1 What are the components of Beeswax food wrap?\na coated fabric, most commonly cotton. It is made by infusing cotton with food-grade beeswax, rosin, coconut oil and jojoba oil\n#2 Do any among a coated fabric, most commonly cotton. It is made by infusing cotton with food-grade beeswax, rosin, coconut oil and jojoba oil contain plastic?\nno\nTherefore, the answer to the original question is False"}
{"prompt":"Question: Should you be skeptical of a 21 year old claiming to have a doctorate?\nTake it step by step:","completion":" #1 What is the average age at which people get their doctorate?\nthree years\n#2 Is 21 very much less than three years ?\nyes\nTherefore, the answer to the original question is True"}
{"prompt":"Question: Would Richard Dawkins hypothetically refuse an offering of the Last rites?\nTake it step by step:","completion":" #1 Which religious beliefs are the Last rites affiliated with?\nCatholicism\n#2 What was Richard Dawkins' belief regarding religion?\nreligious faith is a delusion\n#3 Would a religious faith is a delusion refuse to practice Catholicism?\nyes\nTherefore, the answer to the original question is True"}
{"prompt":"Question: Did Christopher Columbus condone multiple deadly sins?\nTake it step by step:","completion":" #1 What are the deadly sins?\ncapital vices, or cardinal sins\n#2 What were Christopher Columbus's actions in the New World?\nThe troops went wild, stealing, killing, raping, and torturing natives\n#3 Did The troops went wild, stealing, killing, raping, and torturing natives include more than one of capital vices, or cardinal sins?\nyes\nTherefore, the answer to the original question is True"}
{"prompt":"Question: Would an American feel lost due to language barriers at Disneyland Paris?\nTake it step by step:","completion":" #1 What language do Americans mainly speak?\nEnglish\n#2 At Disneyland Paris, what languages are workers required to know?\nFrench and one other\n#3 Is English the same as French and one other?\nno\nTherefore, the answer to the original question is False"}
{"prompt":"Question: Could you make the kitchen 'holy trinity' without celery?\nTake it step by step:","completion":" #1 What ingredients are part of the culinary holy trinity?\nonions, bell peppers and celery\n#2 Is celery absent from onions, bell peppers and celery?\nno\nTherefore, the answer to the original question is False"}
{"prompt":"Question: Is Rurouni Kenshin from same country as lead character in Nobunaga's Ambition?\nTake it step by step:","completion":" #1 Where is Rurouni Kenshin from?\nBakumatsu\n#2 Where was Oda Nobunaga from?\nOwari domain\n#3 Is Bakumatsu the same as Owari domain?\nno\nTherefore, the answer to the original question is True"}
{"prompt":"Question: Should you bring your own bags to Aldi?\nTake it step by step:","completion":" #1 In US Aldi stores, how do customers get shopping bags?\nAldi accepts all four major credit cards\n#2 How do customers get shopping carts?\ntwo sizes of baskets\n#3 Do Aldi accepts all four major credit cards and two sizes of baskets cost money or value?\nno\nTherefore, the answer to the original question is True"}
{"prompt":"Question: Would most children be up past their bedtime if they were watching Conan O'Brien?\nTake it step by step:","completion":" #1 When does Conan O' Brian air?\nMonday through Thursday\n#2 What is the recommended bedtime for children?\nputting to bed or tucking in) is a ritual part of parenting to help children feel more secure and become accustomed to a more rigid schedule of sleep than they might prefer\n#3 Does Monday through Thursday occur after putting to bed or tucking in) is a ritual part of parenting to help children feel more secure and become accustomed to a more rigid schedule of sleep than they might prefer?\nno\nTherefore, the answer to the original question is True"}
{"prompt":"Question: Did Dale Jr.'s father crash his car due to a stroke?\nTake it step by step:","completion":" #1 Who was Dale Jr's father?\nDale Earnhardt Sr.,\n#2 What was the cause of the car crash that killed Dale Earnhardt Sr.,?\nafter making small contact with Sterling Marlin\n#3 Is after making small contact with Sterling Marlin a stroke?\nyes\nTherefore, the answer to the original question is False"}
{"prompt":"Question: Was latest Republican governor of New Jersey as of 2020 heftiest politician ever?\nTake it step by step:","completion":" #1 Who was the latest Republican governor of New Jersey as of 2020?\nChristopher James Christie\n#2 How much does Christopher James Christie weigh?\nChristie's weight would or should affect his viability as a 2012 presidential candidate, either for medical or social reasons. The Obesity Society, a nonprofit scientific group, released a statement asserting, \"To suggest that Governor Christie\n#3 How much did President William Howard Taft weigh?\n244 pounds\n#4 Is Christie's weight would or should affect his viability as a 2012 presidential candidate, either for medical or social reasons. The Obesity Society, a nonprofit scientific group, released a statement asserting, \"To suggest that Governor Christie greater than 244 pounds?\nno\nTherefore, the answer to the original question is False"}
{"prompt":"Question: Will a person survive a fever of NY's highest recorded temperature?\nTake it step by step:","completion":" #1 What was NY's highest recorded temperature?\n108 °F\n#2 Above what temperature will a fever become life-threatening?\n40 °C (104 °F)\n#3 Is 108 °F less than 40 °C (104 °F)?\nno\nTherefore, the answer to the original question is False"}
{"prompt":"Question: 4 Krispy Kreme glazed doughnuts exceed AHA  daily sugar allowance?\nTake it step by step:","completion":" #1 What does the AHA recommend as the maximum amount of sugar a day?\n25 grams\n#2 How much sugar is in a Krispy Kreme glazed doghnut?\nsugar\n#3 What is sugar multiplied by 4?\nyes\n#4 Is yes greater than 25 grams?\nno\nTherefore, the answer to the original question is True"}
{"prompt":"Question: Did Immanuel Kant ever meet the 14th president of the United States?\nTake it step by step:","completion":" #1 On what date did Immanuel Kant die?\n12 February 1804\n#2 Who was the 14th president of the United States?\nFranklin Pierce\n#3 On what date was Franklin Pierce born?\nNovember 23, 1804\n#4 Is November 23, 1804 before 12 February 1804?\nno\nTherefore, the answer to the original question is False"}
{"prompt":"Question: Could a camel fit in a dog house?\nTake it step by step:","completion":" #1 How large are camels?\n300 to 1,000 kg (660 to 2,200 lb)\n#2 How large is a dog house?\nsmall\n#3 Is 300 to 1,000 kg (660 to 2,200 lb) less than or equal to small?\nno\nTherefore, the answer to the original question is False"}
{"prompt":"Question: Would Columbus have discovered Durian trees during his 1492 expedition?\nTake it step by step:","completion":" #1 Which country did Columbus discover on his 1492 experdition?\nHaiti\n#2 Which countries could you find Durian on?\nMalaysia and Indonesia\n#3 Is there any overlap between Haiti and Malaysia and Indonesia?\nyes\nTherefore, the answer to the original question is False"}
{"prompt":"Question: Is the current Chief Justice of the United States forbidden from buying alcohol?\nTake it step by step:","completion":" #1 How old do you have to be to buy alcohol legally in the United States?\n21\n#2 How old is John Roberts?\nJr. (born January 27, 1955\n#3 Is Jr. (born January 27, 1955 larger than 21?\nno\nTherefore, the answer to the original question is False"}
{"prompt":"Question: Could Barron Trump have lived through the Mexican Revolution?\nTake it step by step:","completion":" #1 How long did the Mexican Revolution last?\nroughly from 1910 to 1920\n#2 How old has Barron Trump already lived as of 2020?\ntwo months\n#3 Is two months greater than or equal to roughly from 1910 to 1920?\nno\nTherefore, the answer to the original question is True"}
{"prompt":"Question: Did Martin Luther believe in Satan?\nTake it step by step:","completion":" #1 What religion was Martin Luther?\nProtestant\n#2 Do Protestant's believe in the existence of a non-human evil being (Satan, Beelzebub, the devil, etc)?\nyes\nTherefore, the answer to the original question is True"}
{"prompt":"Question: Does Snoopy look like Chance from Homeward Bound?\nTake it step by step:","completion":" #1 What kind of animal is Chance from Homeward Bound?\nAmerican Bulldog\n#2 What color is Snoopy?\nagle\n#3 What color is American Bulldog typically?\nwhite\n#4 Is agle the same as white?\nno\nTherefore, the answer to the original question is False"}
{"prompt":"Question: Were any members of Canidae in Aesop's Fables?\nTake it step by step:","completion":" #1 Which animals were typical characters in Aesop's Fables?\na lion or a fox or a horse\n#2 Do any of a lion or a fox or a horse belong to the family Canidae?\nyes\nTherefore, the answer to the original question is True"}
{"prompt":"Question: Would United States Air Force consider Return of the Jedi's Han Solo bad hypothetical candidate?\nTake it step by step:","completion":" #1 What requirements does the US Air Force demand of potential candidates?\nbody composition, muscular strength\/endurance, and cardiovascular respiratory fitness\n#2 What are the characteristics of character Han Solo as featured in Return of the Jedi?\nreckless smuggler with a sarcastic wit\n#3 Does reckless smuggler with a sarcastic wit fail to satisfy all of body composition, muscular strength\/endurance, and cardiovascular respiratory fitness?\nyes\nTherefore, the answer to the original question is True"}
{"prompt":"Question: Would Jesus understand the Easter Bunny?\nTake it step by step:","completion":" #1 When did Easter become a holiday?\nmid-2nd century\n#2 In what year did Jesus die?\nAD 30 \/ 33\n#3 Did mid-2nd century occur before AD 30 \/ 33?\nyes\nTherefore, the answer to the original question is False"}
{"prompt":"Question: Is the Greek alphabet as common as Sumerian cuneiform?\nTake it step by step:","completion":" #1 Does the Greek Alphabet still have widespread present-day use\/application?\nalmost entirely vanished\n#2 Does the Sumerian cuneiform still have widespread present-day use\/application?\nbecome extinct\n#3 Are almost entirely vanished and become extinct the same?\nno\nTherefore, the answer to the original question is False"}
{"prompt":"Question: Could Sainsbury's buy Tesco?\nTake it step by step:","completion":" #1 What is the total value of Sainsbury's?\nSainsbury plc\n#2 What is the total value of Tesco?\n£18.1 billion\n#3 Is Sainsbury plc greater than £18.1 billion?\nno\nTherefore, the answer to the original question is False"}
{"prompt":"Question: Are all twins the same gender?\nTake it step by step:","completion":" #1 Which kind of twins are usually of the same gender?\nMonozygotic twins\n#2 Are there other kind(s) of twins apart from Monozygotic twins?\nidentical twins\n#3 Are identical twins also usually of the same gender?\nno\nTherefore, the answer to the original question is False"}
{"prompt":"Question: Are looks the easiest way to tell rosemary from lavender? \nTake it step by step:","completion":" #1 What does rosemary look like?\nwoody, perennial herb\n#2 What does lavender look like?\ngreens\n#3 Are there significant differences between woody, perennial herb and greens?\nyes\nTherefore, the answer to the original question is False"}
{"prompt":"Question: Does Nicole Kidman despise Roman Josi?\nTake it step by step:","completion":" #1 Does Nicole Kidman hate the Nashville Predators players?\nsupports the Nashville Predators\n#2 Does Roman Josi play for the Nashville Predators?\ncurrently serves as captain\n#3 Is currently serves as captain the same answer as supports the Nashville Predators?\nno\nTherefore, the answer to the original question is False"}
{"prompt":"Question: Is a fairy more prevalent in world myths than a valkyrie?\nTake it step by step:","completion":" #1 In what myths do the Valkyries appear?\nNorse\n#2 Do fairies appear in more myths than Norse?\nno\nTherefore, the answer to the original question is True"}
{"prompt":"Question: Can you get Raclette in YMCA headquarters city?\nTake it step by step:","completion":" #1 Where is the YMCA headquartered?\nGeneva, Switzerland\n#2 What foods is Geneva, Switzerland famous for?\nSwiss cheeses\n#3 Is raclette in Swiss cheeses?\nno\nTherefore, the answer to the original question is True"}
{"prompt":"Question: Can I build a house on an asteroid?\nTake it step by step:","completion":" #1 What do you need to hold a house to the surface of an asteroid?\nPlay media Gravity\n#2 Are asteroids large enough to produce Play media Gravity?\nyes\nTherefore, the answer to the original question is False"}
{"prompt":"Question: Would someone in CHE101 require a Maya Angelou book?\nTake it step by step:","completion":" #1 What class is CHE101\nGeneral chemistry\n#2 Are Maya Angelou books suitable for General chemistry?\nyes\nTherefore, the answer to the original question is False"}
{"prompt":"Question: Can too many oranges cause diarrhea?\nTake it step by step:","completion":" #1 What high-level nutritional values do oranges have?\nvitamin C\n#2 Can excess of any of vitamin C cause diarrhea?\nyes\nTherefore, the answer to the original question is True"}
{"prompt":"Question: Could the surface of Europa fry an egg?\nTake it step by step:","completion":" #1 At what temperature will an egg become fried?\nRoom temperature (for more even cooking and to prevent cracking) or from a refrigerator; eggs may be left out overnight to come to room temperature. Piercing Some pierce the eggs beforehand with an egg piercer to prevent cracking. There is much debate on this subject. Ekelund[who?] et al. in Why eggs should not be pierced claimed that pricking caused egg white proteins to be damaged and was therefore to be discouraged. Others, including the American Egg Board, recommend against this, as it can introduce bacteria and create hairline cracks in the shell through which bacteria can enter the egg. Vinegar Some add vinegar to the water (as is sometimes done with poached eggs) to prevent the white from billowing in case of cracking. For this purpose, table salt can also be used. Placing in water There are various ways to place the eggs in the boiling water and remove: one may place the eggs in the pan prior to heating, lower them in on a spoon, or use a specialized cradle to lower them in. A cradle is also advocated as reducing cracking, since the eggs do not then roll around loose. To remove, one may allow the water to cool, pour off the boiling water, or remove the cradle. Steaming Eggs can be taken straight from the refrigerator and placed in the steamer at full steam. The eggs will not crack due to sudden change in temperatures. At full steam, \"soft-boiled\" eggs can be ready in about 6 minutes and \"hard-boiled\" eggs in about twice that time. However due to variations in the starting temperature and the size of the egg as well as the altitude of the location (longer needed for higher altitudes), these times can only be an approximation. Sous vide Rather than cooking in boiling water, boiled eggs can be made by cooking\/coddling in their shell \"sous vide\" in hot water at steady temperatures anywhere from 60 to 85 °C\n#2 What is the temperature on the surface of Europa?\n110 K\n#3 Is 110 K greater than or equal to Room temperature (for more even cooking and to prevent cracking) or from a refrigerator; eggs may be left out overnight to come to room temperature. Piercing Some pierce the eggs beforehand with an egg piercer to prevent cracking. There is much debate on this subject. Ekelund[who?] et al. in Why eggs should not be pierced claimed that pricking caused egg white proteins to be damaged and was therefore to be discouraged. Others, including the American Egg Board, recommend against this, as it can introduce bacteria and create hairline cracks in the shell through which bacteria can enter the egg. Vinegar Some add vinegar to the water (as is sometimes done with poached eggs) to prevent the white from billowing in case of cracking. For this purpose, table salt can also be used. Placing in water There are various ways to place the eggs in the boiling water and remove: one may place the eggs in the pan prior to heating, lower them in on a spoon, or use a specialized cradle to lower them in. A cradle is also advocated as reducing cracking, since the eggs do not then roll around loose. To remove, one may allow the water to cool, pour off the boiling water, or remove the cradle. Steaming Eggs can be taken straight from the refrigerator and placed in the steamer at full steam. The eggs will not crack due to sudden change in temperatures. At full steam, \"soft-boiled\" eggs can be ready in about 6 minutes and \"hard-boiled\" eggs in about twice that time. However due to variations in the starting temperature and the size of the egg as well as the altitude of the location (longer needed for higher altitudes), these times can only be an approximation. Sous vide Rather than cooking in boiling water, boiled eggs can be made by cooking\/coddling in their shell \"sous vide\" in hot water at steady temperatures anywhere from 60 to 85 °C?\nyes\nTherefore, the answer to the original question is False"}
{"prompt":"Question: Can I ski in Steamboat Springs, Colorado in August?\nTake it step by step:","completion":" #1 What is the average temperature in Steamboat Springs, CO in August?\n. Summers are very warm to hot, and winters are extremely cold, with lows close to zero\n#2 What is the melting point of snow?\n0 °C\n#3 Is . Summers are very warm to hot, and winters are extremely cold, with lows close to zero lower than 0 °C?\nyes\nTherefore, the answer to the original question is False"}
{"prompt":"Question: Is dopamine snorted nasally by drug users?\nTake it step by step:","completion":" #1 What kind of substance is dopamine?\norganic base\n#2 Are organic base usually taken through the nose by drug users?\nno\nTherefore, the answer to the original question is False"}
{"prompt":"Question: Is it common for women to have moustaches?\nTake it step by step:","completion":" #1 Which gender grows sizable moustaches more commonly?\nmales\n#2 Is males the same as women?\nyes\nTherefore, the answer to the original question is False"}
{"prompt":"Question: Is Michael an unpopular name in the United States?\nTake it step by step:","completion":" #1 What are the most popular names in the USA?\nMichael\n#2 Is Michael absent from Michael?\nyes\nTherefore, the answer to the original question is False"}
{"prompt":"Question: Is Central Park Zoo located on an island?\nTake it step by step:","completion":" #1 Where is the Central Park Zoo located?\nEast 64th Street and Fifth Avenue\n#2 Is East 64th Street and Fifth Avenue an island?\nno\nTherefore, the answer to the original question is True"}
{"prompt":"Question: Can food be cooked in the cosmic microwave background?\nTake it step by step:","completion":" #1 What kind of radiation is used in microwave ovens?\nelectromagnetic\n#2 What kind of radiation is produced in the cosmic microwave background?\nelectromagnetic\n#3 Is electromagnetic the same as electromagnetic?\nno\nTherefore, the answer to the original question is False"}
{"prompt":"Question: Is coal needed to practice parachuting?\nTake it step by step:","completion":" #1 What is one of the most important items that you need to go parachuting?\nfood\n#2 What is food made out of?\nNylon\n#3 Is Nylon originally made from coal?\nyes\nTherefore, the answer to the original question is True"}
{"prompt":"Question: Would an oil painter avoid reds from scale insects that live on a cactus?\nTake it step by step:","completion":" #1 What red pigments are made from insects?\nKermes\" of Armenia\n#2 What scale insects live on cacti?\ncochineal species\n#3 What pigments overlap with Kermes\" of Armenia and cochineal species?\nPorphyrophora\n#4 Is Porphyrophora unstable in oil paint?\nyes\nTherefore, the answer to the original question is True"}
{"prompt":"Question: Could you go to New York Public Library and the Six Flags Great Escape in the same day?\nTake it step by step:","completion":" #1 Where is Six Flags Great Escape located?\nQueensbury, New York\n#2 Where is The New York Public Library located?\nMidtown Manhattan\n#3 How long does it take to drive from Queensbury, New York to Midtown Manhattan?\nyes\n#4 Is yes less than 24 hours?\nno\nTherefore, the answer to the original question is True"}
{"prompt":"Question: Did any of religions in which Himalayas are sacred originate in 19th century?\nTake it step by step:","completion":" #1 Which religions believe that the Himalayas are sacred?\nHinduism, Buddhism, Jainism and Sikhism\n#2 When did Hinduism, Buddhism, Jainism and Sikhism originate?\ntimes of religious persecution\n#3 Are any of times of religious persecution equal to the 19th century?\nno\nTherefore, the answer to the original question is False"}
{"prompt":"Question: Did brother of Goofy creator's employer commit an excommunicable offense?\nTake it step by step:","completion":" #1 Who created the character Goofy?\nPinto Colvig\n#2 Who did Pinto Colvig work for?\nWalt Disney Productions\n#3 Who are Walt Disney Productions's siblings?\nRaymond Arnold Disney\n#4 Are any of Raymond Arnold Disney Freemasons?\nyes\n#5 Is yes a reason for excommunication?\nyes\nTherefore, the answer to the original question is True"}
{"prompt":"Question: Can a Toyota Supra make a vlog?\nTake it step by step:","completion":" #1 What is a vlog?\nvideo blog\n#2 Who makes video blog?\nvloggers\n#3 What is a Toyota Supra?\na sports car and grand tourer\n#4 Is a sports car and grand tourer the same as vloggers?\nno\nTherefore, the answer to the original question is False"}
{"prompt":"Question: Was Daniel thrown into the lion's den in the New Testament?\nTake it step by step:","completion":" #1 Which book of the Bible has the story of Daniel in the lions' den?\nBook of Daniel\n#2 Is Book of Daniel in the New Testament of the Bible?\nno\nTherefore, the answer to the original question is False"}
{"prompt":"Question: Would someone on antidepressants need to be cautious of some citrus fruits?\nTake it step by step:","completion":" #1 Which fruits can affect antidepressant medications?\ngrapefruit\n#2 Is grapefruit a citrus fruit?\nyes\nTherefore, the answer to the original question is True"}
{"prompt":"Question: Do people take laxatives because they enjoy diarrhea?\nTake it step by step:","completion":" #1 What is the primary reason for taking laxatives?\nto treat and prevent constipation\n#2 Is to treat and prevent constipation to induce diarrhea?\nno\nTherefore, the answer to the original question is False"}
{"prompt":"Question: Could Durian cause someone's stomach to feel unwell?\nTake it step by step:","completion":" #1 What would some people describe durian's smell as?\nrotten onions\n#2 Would rotten onions  cause some people to feel unwell?\nno\nTherefore, the answer to the original question is True"}
{"prompt":"Question: Did the swallow play a role in a famous film about King Arthur?\nTake it step by step:","completion":" #1 What Monty Python film is about King Arthur?\nMonty Python and the Holy Grail\n#2 Are swallows mentioned several times in Monty Python and the Holy Grail?\nyes\nTherefore, the answer to the original question is True"}
{"prompt":"Question: Does the Boy Who Cried Wolf hypothetically have reason to pray to Pan?\nTake it step by step:","completion":" #1 What is the profession of The Boy Who Cried Wolf?\nshepherd\n#2 What profession is Pan the god of?\ntheatrical criticism\n#3 Is shepherd the same as theatrical criticism?\nno\nTherefore, the answer to the original question is True"}
{"prompt":"Question: Are there enough people in the Balkans to match the population of Japan?\nTake it step by step:","completion":" #1 What is the population of the Balkans?\n59,297,000\n#2 What is the population of Japan?\n126.2 million\n#3 Is 59,297,000 more than 126.2 million?\nno\nTherefore, the answer to the original question is False"}
{"prompt":"Question: Would you hire someone with dyscalculia to do surveying work?\nTake it step by step:","completion":" #1 What do people with dyscalculia struggle with?\ndifficulty in learning or comprehending arithmetic\n#2 What skills are necessary to be a competent surveyor?\ngeometry, trigonometry, regression analysis, physics, engineering, metrology, programming languages, and the law\n#3 Is difficulty in learning or comprehending arithmetic not listed in geometry, trigonometry, regression analysis, physics, engineering, metrology, programming languages, and the law?\nyes\nTherefore, the answer to the original question is False"}
{"prompt":"Question: Is a paraplegic suitable for conducting an orchestra?\nTake it step by step:","completion":" #1 What part(s) of the body is\/are needed to conduct an orchestra?\nhand\n#2 Which portion of a paraplegic's body is paralyzed?\nlower extremities\n#3 Are hand separate from lower extremities?\nno\nTherefore, the answer to the original question is True"}
{"prompt":"Question: Is Capricorn the hypothetical zodiac sign of Satanism?\nTake it step by step:","completion":" #1 What animal represents the zodiac sign Capricorn?\nsea goat\n#2 What are some symbols in Satanism?\ninverted crosses and blasphemous parodies of Christian art\n#3 Is sea goat among inverted crosses and blasphemous parodies of Christian art?\nyes\nTherefore, the answer to the original question is True"}
{"prompt":"Question: Would a sesame seed be mistaken for a wood frog egg?\nTake it step by step:","completion":" #1 What shape and size is a sesame seed?\nsmall\n#2 What is the shape and size of a wood frog egg?\nlarge aggregations of masses\n#3 Are small and large aggregations of masses the same?\nno\nTherefore, the answer to the original question is False"}
{"prompt":"Question: Does Adam Sandler skip celebrating Easter?\nTake it step by step:","completion":" #1 Easter is usually celebrated by people of which religion?\nChristian\n#2 What is Adam Sandler's religion?\nJudaism\n#3 Is Christian different from Judaism?\nyes\nTherefore, the answer to the original question is True"}
{"prompt":"Question: Is there historic graffiti on Alcatraz?\nTake it step by step:","completion":" #1 Who were the occupants of the island of Alcatraz in 1969?\nNative Americans from San Francisco\n#2 Did Native Americans from San Francisco make wall writings?\nyes\nTherefore, the answer to the original question is True"}
{"prompt":"Question: Did Queen Elizabeth I read the works of Jean-Paul Sartre?\nTake it step by step:","completion":" #1 When did Queen Elizabeth I die?\n24 March 1603\n#2 When was Jean-Paul Sartre bron?\n21 June 1905\n#3 Is 21 June 1905 before 24 March 1603?\nno\nTherefore, the answer to the original question is False"}
{"prompt":"Question: Did Polar Bears roam around in Ancient Greece?\nTake it step by step:","completion":" #1 Where do polar bears live?\nArctic Circle\n#2 What is the average temperature of Arctic Circle?\n−30s\n#3 What was the average temperature of Ancient Greece?\n−27.8 °C\n#4 Is −27.8 °C the same as −30s?\nno\nTherefore, the answer to the original question is False"}
{"prompt":"Question: Was United Airlines blameless in worst crash in history?\nTake it step by step:","completion":" #1 Which aviation accident is considered the worst in aviation history?\nTenerife airport disaster\n#2 Is United Airlines excluded from Tenerife airport disaster?\nyes\nTherefore, the answer to the original question is True"}
{"prompt":"Question: Does New York Harbor sit on a craton without volcanic activity?\nTake it step by step:","completion":" #1 What craton is New York Harbor on?\nHudson River\n#2 Is Hudson River devoid of volcanic activity?\nyes\nTherefore, the answer to the original question is False"}
{"prompt":"Question: Would Statue of Liberty be visible if submerged in Bohai Sea?\nTake it step by step:","completion":" #1 How deep is the Bohai Sea?\nyes no@@YES_NO_SEP@@How deep is the Bohai Sea? \n#2 How tall is the Statue of Liberty?\njust over 151 feet\n#3 Is just over 151 feet greater than yes no@@YES_NO_SEP@@How deep is the Bohai Sea? ?\nno\nTherefore, the answer to the original question is True"}
{"prompt":"Question: Have Jamie Lee Curtis been the subject of fake news?\nTake it step by step:","completion":" #1 What is fake news?\nmisinformation, disinformation or mal-information\n#2 Has Jamie Lee Curtis ever been the victim of misinformation, disinformation or mal-information?\nyes\nTherefore, the answer to the original question is True"}
{"prompt":"Question: Will the Stanford Linear Accelerator fit on the Golden Gate Bridge?\nTake it step by step:","completion":" #1 What is the length of the Golden Gate Bridge?\n8,981 feet\n#2 How long is the Stanford Linear Accelerator?\n3.2 kilometer (2 mile)\n#3 Is 8,981 feet greater than or equal to 3.2 kilometer (2 mile)?\nyes\nTherefore, the answer to the original question is False"}
{"prompt":"Question: Could JPMorgan Chase give every American $10?\nTake it step by step:","completion":" #1 How much are the total assets of JPMorgan Chase?\nUS$2.687 trillion\n#2 What is the population of the United States?\n329,227,746\n#3 Is 329,227,746 times $10 less than US$2.687 trillion?\nno\nTherefore, the answer to the original question is True"}
{"prompt":"Question: Is the Matrix a standalone movie?\nTake it step by step:","completion":" #1 How many movies are in The Matrix franchise?\ntrilogy\n#2 Is trilogy equal to one?\nno\nTherefore, the answer to the original question is False"}
{"prompt":"Question: Is Noah's Ark an upgrade for Golden Age of Piracy pirates?\nTake it step by step:","completion":" #1 Which pirates were famously known during the Golden Age of Piracy?\nCaptain Samuel Bellamy\n#2 What were the dimensions of Noah's Ark?\n300 cubits long, 50 cubits wide, and 30 cubits high\n#3 Is 300 cubits long, 50 cubits wide, and 30 cubits high greater than the dimensions of the ships of most of Captain Samuel Bellamy?\nno\nTherefore, the answer to the original question is True"}
{"prompt":"Question: Has Nikola Tesla's name inspired multiple brands?\nTake it step by step:","completion":" #1 How many brands are named after Nikola Tesla?\nthree\n#2 Is three much more than one?\nno\nTherefore, the answer to the original question is True"}
{"prompt":"Question: Are all Wednesdays in a year enough to read Bible 15 times?\nTake it step by step:","completion":" #1 How many Wednesdays are there in a year?\n20871 weeks\n#2 What is 20871 weeks multiplied by 24?\nyes\n#3 How long does it take to read the old testament?\n39 books\n#4 How long does it take to read the new testament?\n27-book\n#5 Is yes greater than or equal to: 39 books plus 27-book?\nno\nTherefore, the answer to the original question is True"}
{"prompt":"Question: Do children's bicycles often have extra wheels?\nTake it step by step:","completion":" #1 What types of bicycles have more than two wheels?\nPlay media Training wheels\n#2 Are any of Play media Training wheels customarily bought for children?\nno\nTherefore, the answer to the original question is True"}
{"prompt":"Question: Would most school children in New York be wearing jackets on groundhog day?\nTake it step by step:","completion":" #1 What month does Groundhog day occur?\nFebruary\n#2 What is the season in February?\nwinter\n#3 Do people typically wear jackets during winter?\nno\nTherefore, the answer to the original question is True"}
{"prompt":"Question: Could a white cockatoo have lived through the entire Thirty Years' War?\nTake it step by step:","completion":" #1 How long did the Thirty Years' War last?\n1618–1648\n#2 How long can white cockatoos live?\n40–60 years in captivity\n#3 Is 40–60 years in captivity greater than or equal to 1618–1648?\nyes\nTherefore, the answer to the original question is True"}
{"prompt":"Question: Did Jesus go to school to study railroad engineering?\nTake it step by step:","completion":" #1 When was the steam locomotive invented?\nearly 19th century\n#2 When did Jesus die?\nc. AD 30 \/ 33\n#3 Was early 19th century before c. AD 30 \/ 33?\nno\nTherefore, the answer to the original question is False"}
{"prompt":"Question: Can Arnold Schwarzenegger deadlift an adult Black rhinoceros?\nTake it step by step:","completion":" #1 How much can Arnold Schwarzenegger deadlift?\n710 lb\n#2 How much does an adult Black rhino weigh?\n800 to 1,400 kg (1,760 to 3,090 lb),\n#3 Is 710 lb greater than 800 to 1,400 kg (1,760 to 3,090 lb),?\nno\nTherefore, the answer to the original question is False"}
{"prompt":"Question: Can the Palace of Westminster tell time in the dark?\nTake it step by step:","completion":" #1 What is the clock tower of the Palace of Westminster?\nElizabeth Tower, commonly known as Big Ben. At 96 metres (315 ft), it is only slightly shorter than Victoria Tower but much slimmer. Originally known simply as the Clock Tower (the name Elizabeth Tower was conferred on it in 2012 to celebrate the Diamond Jubilee of Elizabeth II), it houses the Great Clock of Westminster\n#2 What does Elizabeth Tower, commonly known as Big Ben. At 96 metres (315 ft), it is only slightly shorter than Victoria Tower but much slimmer. Originally known simply as the Clock Tower (the name Elizabeth Tower was conferred on it in 2012 to celebrate the Diamond Jubilee of Elizabeth II), it houses the Great Clock of Westminster use to communicate time?\nThe Great Bell of Westminster\n#3 Can The Great Bell of Westminster work without light?\nno\nTherefore, the answer to the original question is True"}
{"prompt":"Question: Can a prime number be represented by the number of days in a week?\nTake it step by step:","completion":" #1 How many days are there in a week?\nseven\n#2 Is seven a prime number?\nyes\nTherefore, the answer to the original question is True"}
{"prompt":"Question: Would a tool used for Martin Luther's Reformation opening salvo aid in a crucifixion?\nTake it step by step:","completion":" #1 What did Martin Luther begin his Reformation with?\nNinety-five Theses\n#2 What tools were used in Ninety-five Theses?\nhammer or pneumatic nail gun\n#3 What are the tools required to preform Roman crucifixions?\nwooden beam\n#4 Is there any overlap between hammer or pneumatic nail gun and wooden beam?\nno\nTherefore, the answer to the original question is True"}
{"prompt":"Question: Is Edgar Allan Poe obscure in the world of horror fiction?\nTake it step by step:","completion":" #1 How long have Edgar Allan Poe's writings remained in common use?\na century ago\n#2 How long has his work in horror writing been used in classroom curricula?\n1842\n#3 Is a century ago or 1842 less than a decade?\nyes\nTherefore, the answer to the original question is False"}
{"prompt":"Question: Do all shooting sports involve bullets?\nTake it step by step:","completion":" #1 What are some common projectiles used in shooting sports?\nbows\/crossbows\n#2 Are all of bows\/crossbows bullets?\nno\nTherefore, the answer to the original question is False"}
{"prompt":"Question: Will Ahura Mazda have to look down to see Abaddon's dwelling??\nTake it step by step:","completion":" #1 Where does Abaddon dwell?\nbottomless pit\n#2 Where is Ahura Mazda known to reside?\nthe Yasna\n#3 Is the Yasna located physically above bottomless pit?\nno\nTherefore, the answer to the original question is True"}
{"prompt":"Question: Was Alaska part of the Northern Army during the Civil War?\nTake it step by step:","completion":" #1 When did the American Civil War take place?\n1861 to 1865\n#2 When did Alaska become part of the United States?\n1884\n#3 Is 1884 before 1861 to 1865?\nno\nTherefore, the answer to the original question is False"}
{"prompt":"Question: Do Bing (search engine) searches earn the searcher more than competitors do?\nTake it step by step:","completion":" #1 What does Bing give to people who use the search engine?\ncredits\n#2 Who are Bing's major competitors?\nGoogle and Yahoo!,\n#3 What do the companies in Google and Yahoo!, give people for using their service?\nyes no@@YES_NO_SEP@@What do the companies in Google and Yahoo!, give people for using their service? \n#4 Is credits of greater value than yes no@@YES_NO_SEP@@What do the companies in Google and Yahoo!, give people for using their service? ?\nno\nTherefore, the answer to the original question is True"}
{"prompt":"Question: Would a loudspeaker be useful for most Gallaudet students?\nTake it step by step:","completion":" #1 What disability do Gallaudet students suffer from?\ndeaf and hard of hearing\n#2 What does a loudspeaker do?\nconverts an electrical audio signal into a corresponding sound\n#3 Would converts an electrical audio signal into a corresponding sound be beneficial for people who have deaf and hard of hearing?\nno\nTherefore, the answer to the original question is False"}
{"prompt":"Question: Would three newborn kittens fit on a standard Amtrak coach seat?\nTake it step by step:","completion":" #1 What is the size of a newborn kitten?\n46 cm (18 in)\n#2 How big would 46 cm (18 in) times three kittens be?\n\n#3 How large is an Amtrak coach seat?\n19 inches wide\n#4 Is  smaller than 19 inches wide?\nno\nTherefore, the answer to the original question is True"}
{"prompt":"Question: Could a newborn look over the top of a fully grown horseradish plant?\nTake it step by step:","completion":" #1 How tall are newborn babies on average?\n35.6–50.8 cm\n#2 How tall is the average horseradish plant?\n1.5 meters\n#3 Is 35.6–50.8 cm greater than 1.5 meters?\nno\nTherefore, the answer to the original question is False"}
{"prompt":"Question: Does the Red Sea have biblical significance? \nTake it step by step:","completion":" #1 What bodies of water are important to Biblical stories?\nThe river\n#2 Is the Red Sea among The river?\nno\nTherefore, the answer to the original question is True"}
{"prompt":"Question: Would moon cakes be easy to find in Chinatown, Manhattan?\nTake it step by step:","completion":" #1 What cuisine are moon cakes from?\nChinese\n#2 Does Chinatown, Manhattan sell food products of Chinese?\nno\nTherefore, the answer to the original question is True"}
{"prompt":"Question: Is Bugs Bunny known for carrying a root vegetable around with him?\nTake it step by step:","completion":" #1 What does Bugs Bunny carry around with him?\ncarrot\n#2 Is carrot a root vegetable?\nyes\nTherefore, the answer to the original question is True"}
{"prompt":"Question: Would someone buying crickets be likely to own pets?\nTake it step by step:","completion":" #1 What are some common animal classes that people keep as pets?\nrabbits; ferrets; pigs\n#2 Do any of rabbits; ferrets; pigs usually eat crickets?\nno\nTherefore, the answer to the original question is True"}
{"prompt":"Question: Are some adherents to Christianity in China historic enemies of Catholic Church?\nTake it step by step:","completion":" #1 Which Christian denominations are historic enemies of the Catholic Church?\nHuguenots (French Calvinist Protestants\n#2 Do any of the denominations in Huguenots (French Calvinist Protestants currently have adherents in China?\nyes\nTherefore, the answer to the original question is True"}
{"prompt":"Question: Can a Kia Rio fit inside the Oval Office?\nTake it step by step:","completion":" #1 How large is the Oval Office?\nfour doors\n#2 How large is a Kia Rio?\nsubcompact\n#3 Is four doors greater than or equal to subcompact?\nno\nTherefore, the answer to the original question is True"}
{"prompt":"Question: Were veterans of the War in Vietnam (1945–46) given free education by the Soviet Union?\nTake it step by step:","completion":" #1 The Soviet Union gave free education to children of people who died in which war?\nWorld War II\n#2 When did World War II end?\n1945\n#3 When did the War in Vietnam (1945-46) end?\n30 April 1975\n#4 Was 30 April 1975 before 1945?\nno\nTherefore, the answer to the original question is False"}
{"prompt":"Question: Is the Easter Bunny popular in September?\nTake it step by step:","completion":" #1 What holiday does the Easter Bunny symbolize?\nEaster\n#2 Is Easter celebrated in September?\nyes\nTherefore, the answer to the original question is False"}
{"prompt":"Question: Is Mozambique Drill an easy shot for United States Army Ranger?\nTake it step by step:","completion":" #1 What is the The Mozambique Drill?\na close-quarters shooting technique\n#2 What guns are United States Army Rangers equipped with?\n7.62×51mm variant of the FN SCAR\n#3 What is the shooting range of 7.62×51mm variant of the FN SCAR?\n500 to 600 meters\n#4 Would a gun with the range of 500 to 600 meters be helpful in a close-quarters shooting technique?\nno\nTherefore, the answer to the original question is True"}
{"prompt":"Question: Is lunch on the beach a good activity to spot the full circle of a rainbow?\nTake it step by step:","completion":" #1 At what point in the sky is the sun most likely to create a full circle rainbow?\nabove the ground\n#2 At what altitudes are full rainbows more likely to be seen?\nabove the earth\n#3 Is lunchtime at the beach relatively close to conditions above the ground and above the earth?\nyes\nTherefore, the answer to the original question is False"}
{"prompt":"Question: Is the Mona Lisa based on a real person?\nTake it step by step:","completion":" #1 Who was the Mona Lisa painting based on?\nLisa Gherardini\n#2 Is Lisa Gherardini a real person?\nno\nTherefore, the answer to the original question is True"}
{"prompt":"Question: Did Johann Sebastian Bach leave his first wife for his second wife?\nTake it step by step:","completion":" #1 What dates was Johann Sebastian Bach married to Anna Magdalena Bach?\nDecember 3, 1721\n#2 When did Maria Barbara Bach die?\n1720\n#3 Is 1720 included in December 3, 1721?\nno\nTherefore, the answer to the original question is False"}
{"prompt":"Question: Could Eddie Hall hypothetically deadlift the world's largest cheeseburger?\nTake it step by step:","completion":" #1 What is Eddie Hall's record deadlist?\n500 kg\n#2 What is the weight of the world largest cheeseburger?\n2,014 pounds\n#3 Is 500 kg larger than 2,014 pounds?\nno\nTherefore, the answer to the original question is False"}
{"prompt":"Question: Has Justin Timberlake ever written a song about Britney Spears?\nTake it step by step:","completion":" #1 Who did Justin Timberlake date in 1999?\nBritney Spears\n#2 Who was the song 'Cry Me A River' by Justin timberlake about?\nBritney Spears\n#3 Is Britney Spears and Britney Spears the same?\nno\nTherefore, the answer to the original question is True"}
{"prompt":"Question: Do most high school head coaches make as much as the Head Coach at NCSU?\nTake it step by step:","completion":" #1 What is the average salary for a high school head coach?\nhigh school coaches are primarily tasked with organizing and training football players. This includes creating game plans, evaluating players, and leading the team during competition.\n#2 What is the salary of the head football coach at NCSU?\n$1.8 million\n#3 Is high school coaches are primarily tasked with organizing and training football players. This includes creating game plans, evaluating players, and leading the team during competition. within 5% of $1.8 million?\nno\nTherefore, the answer to the original question is False"}
{"prompt":"Question: Did Christopher Columbus break the fifth commandment in Christianity?\nTake it step by step:","completion":" #1 What is the fifth commandment in Christianity?\nHonor thy father and thy mother\n#2 What activities did Christopher Columbus subject Native Americans too?\nencomienda system\n#3 Is the activity in Honor thy father and thy mother also in encomienda system?\nno\nTherefore, the answer to the original question is True"}
{"prompt":"Question: Can you transport a primate in a backpack?\nTake it step by step:","completion":" #1 What is the average size and weight capacity of a backpack?\n10 kilograms\n#2 What are some common primates?\nMadame Berthe's mouse lemur\n#3 Is any of Madame Berthe's mouse lemur such that its size and weight is less than or equal to 10 kilograms?\nyes\nTherefore, the answer to the original question is True"}
{"prompt":"Question: Was King Arthur at the beheading of Anne Boleyn?\nTake it step by step:","completion":" #1 When is King Arthur thought to have died?\nearly 6th century\n#2 When was Anne Boleyn born?\n1501\n#3 Is 1501 before early 6th century?\nno\nTherefore, the answer to the original question is False"}
{"prompt":"Question: Can the city of Miami fit inside Uppsala?\nTake it step by step:","completion":" #1 What is the area of Miami?\n56 square miles\n#2 What is the area of Uppsala?\nUppsala County\n#3 Is 56 square miles less than or equal to Uppsala County?\nno\nTherefore, the answer to the original question is False"}
{"prompt":"Question: Does Iphone have more iterations than Samsung Galaxy?\nTake it step by step:","completion":" #1 How many models of the iPhone have been released as of 2020?\n25\n#2 How many models of the Samsung Galaxy have been released as of 2020?\n20\n#3 Is 25 greater than 20?\nno\nTherefore, the answer to the original question is False"}
{"prompt":"Question: Is Hanuman associated with a Norse god?\nTake it step by step:","completion":" #1 Which god is Hanuman associated with?\nRama\n#2 Is Rama in Norse mythology?\nno\nTherefore, the answer to the original question is False"}
{"prompt":"Question: Did a Polish poet write sonnets about Islamic religion?\nTake it step by step:","completion":" #1 What were the major focus of Adam Mickiewicz's sonnets?\nthe Crimea\n#2 Is the Crimea about Islamic religion?\nThe Crimean Sonnets is an expression of Mickiewicz's interest in the Orient\n#3 Was Adam Mickiewicz a Polish poet?\nwas a Polish poet\n#4 Are The Crimean Sonnets is an expression of Mickiewicz's interest in the Orient and was a Polish poet positive?\nyes\nTherefore, the answer to the original question is True"}
{"prompt":"Question: Can you find Bugs Bunny at Space Mountain?\nTake it step by step:","completion":" #1 Where is Space Mountain located?\nfive of the six Disneyland-style Disney Parks\n#2 Which animation studio created Bugs Bunny?\nLeon Schlesinger Productions\n#3 Which entertainment company is five of the six Disneyland-style Disney Parks related to?\nThe Walt Disney Company\n#4 Is Leon Schlesinger Productions part of The Walt Disney Company?\nno\nTherefore, the answer to the original question is False"}
{"prompt":"Question: Could modern Brazilian Navy have hypothetically turned the tide in Battle of Actium?\nTake it step by step:","completion":" #1 What was the result of the Battle of Actium?\nOctavian's victory\n#2 In Octavian's victory, how many resources did the Octavian's army have?\n300 ships\n#3  How many resources does the Brazilian Navy have? \n60,000 active personnel\n#4 Is 60,000 active personnel significantly more than 300 ships?\nyes\nTherefore, the answer to the original question is True"}
{"prompt":"Question: Could the children of Greek hero Jason hypothetically fill a polo team?\nTake it step by step:","completion":" #1 How many children did Greek mythological hero Jason have?\nbetween one and fourteen\n#2 How many people are needed to make a polo team?\nsix\n#3 Is between one and fourteen equal to or more than six?\nno\nTherefore, the answer to the original question is True"}
{"prompt":"Question: Can you swim to Miami from New York?\nTake it step by step:","completion":" #1 What is the longest distance that a human has ever swum?\n225 km (139.8 miles)\n#2 How far does one need to swim to get from New York to Miami?\n13.7-mile\n#3 Is 225 km (139.8 miles) more than 13.7-mile?\nno\nTherefore, the answer to the original question is False"}
{"prompt":"Question: Could ABBA play a mixed doubles tennis game against each other?\nTake it step by step:","completion":" #1 How many men and women are required to participate in a mixed doubles tennis game?\none\n#2 How many men and women are members of the ABBA group?\ntwo\n#3 Is two at least equal to one?\nyes\nTherefore, the answer to the original question is True"}
{"prompt":"Question: Is material from an aloe plant sometimes enclosed in petroleum-derived products?\nTake it step by step:","completion":" #1 What kind of products are derived from petroleum?\npetroleum products that are made up of refined crude oil\n#2 What products are made from aloe plants?\nlotion, gel, soap or cosmetics product\n#3 Is lotion, gel, soap or cosmetics product ever be packaged inside petroleum products that are made up of refined crude oil?\nno\nTherefore, the answer to the original question is True"}
{"prompt":"Question: Could Hurricane Harvey catch a Peregrine falcon?\nTake it step by step:","completion":" #1 What was the top speed of Hurricane Harvey?\n130 mph\n#2 What is the top speed of a Peregrine falcon?\n389 km\/h (242 mph).\n#3 Is 130 mph greater than 389 km\/h (242 mph).?\nno\nTherefore, the answer to the original question is False"}
{"prompt":"Question: Do bodies movie during hanging?\nTake it step by step:","completion":" #1 What does death by hanging usually induce in victims?\nmedical conditions\n#2 What processes could occur in the nervous system immediately after death?\nSphincters will relax spontaneously and urine and faeces will be evacuated\n#3 Do medical conditions or Sphincters will relax spontaneously and urine and faeces will be evacuated result in body movement?\nyes\nTherefore, the answer to the original question is True"}
{"prompt":"Question: Would Benito Mussolini hypothetically play well in the NBA?\nTake it step by step:","completion":" #1 What is the height of Benito Mussolini?\n29 July 1883 – 28 April 1945) was Prime Minister of Italy\n#2 On average, what is the height of an NBA player?\njust under 6 feet 7 inches\n#3 Is 29 July 1883 – 28 April 1945) was Prime Minister of Italy comparable to just under 6 feet 7 inches?\nno\nTherefore, the answer to the original question is False"}
{"prompt":"Question: Does US brand Nice depend on Western honey bee?\nTake it step by step:","completion":" #1 Which insect does US brand Nice need to obtain the honey they sell from?\nbees\n#2 Is the Western honey bee a common example of bees that can be found in the US?\nno\nTherefore, the answer to the original question is True"}
{"prompt":"Question: Can Hulk's alter ego explain atomic events?\nTake it step by step:","completion":" #1 Who is the Hulk's alter ego?\nDr. Robert Bruce Banner\n#2 What is the profession of Dr. Robert Bruce Banner?\nphysicist\n#3 What do people in physicist have a knowledge of?\nthe interactions of matter and energy at all length and time scales in the physical universe\n#4 Is atomic events included in the interactions of matter and energy at all length and time scales in the physical universe?\nno\nTherefore, the answer to the original question is True"}
{"prompt":"Question: Can a firewall protect against a short circuit?\nTake it step by step:","completion":" #1 What kind of threats does a firewall protect a computer system against?\nuntrusted external network\n#2 What are the possible causes and results of a short circuit as concerning computers?\nan excessive current flowing through the circuit\n#3 Is any of an excessive current flowing through the circuit included in untrusted external network?\nyes\nTherefore, the answer to the original question is False"}
{"prompt":"Question: Would Swiss Guard defeat the Marines?\nTake it step by step:","completion":" #1 How many people are in the Swiss Guard?\n134\n#2 How many people are in the US Marine Corp?\n186,000\n#3 Is 134 greater than or equal to 186,000?\nno\nTherefore, the answer to the original question is False"}
{"prompt":"Question: Does conservatism repulse Blaire White?\nTake it step by step:","completion":" #1 What is Blaire White's political orientation as evidenced by her expressions?\ncenter-right\n#2 Is center-right completely devoid of conservatism?\nyes\nTherefore, the answer to the original question is False"}
{"prompt":"Question: Do skeletons have hair?\nTake it step by step:","completion":" #1 Where does hair grow from?\nfollicles\n#2 What are skeletons made out of?\nboth fused and individual bones\n#3 Does both fused and individual bones have follicles?\nno\nTherefore, the answer to the original question is False"}
{"prompt":"Question: Did H.G. Wells' \"War of the Worlds\" include cosmic rays?\nTake it step by step:","completion":" #1 When was the War of the Worlds published?\n1898\n#2 When were cosmic rays discovered?\n1912\n#3 Did 1912 come before 1898?\nyes\nTherefore, the answer to the original question is False"}
{"prompt":"Question: Does 50 Cent get along with Jeffrey Atkins?\nTake it step by step:","completion":" #1 What artists was Jeffrey Atkins critical of in his song Loose Change?\n50 Cent, as well as Eminem, Busta Rhymes and Dr. Dre\n#2 Is 50 Cent outside the group of 50 Cent, as well as Eminem, Busta Rhymes and Dr. Dre?\nno\nTherefore, the answer to the original question is False"}
{"prompt":"Question: Is it normal for people to sing when the YMCA is mentioned?\nTake it step by step:","completion":" #1 In what song was the YMCA written about?\nHot Cop\n#2 Is Hot Cop a very popular song?\nyes\nTherefore, the answer to the original question is True"}
{"prompt":"Question: Do members of NFL teams receive infantry training?\nTake it step by step:","completion":" #1 Which group(s) are entitled to infantry training?\nenlisted United States Marines\n#2 Are members of the NFL team one of enlisted United States Marines?\nno\nTherefore, the answer to the original question is False"}
{"prompt":"Question: Do most religious people in Quebec refer to the Quran?\nTake it step by step:","completion":" #1 What is the dominant religion in Quebec?\nRoman Catholic\n#2 Do adherents of Roman Catholic commonly refer to the Quran?\nyes\nTherefore, the answer to the original question is False"}
{"prompt":"Question: Is a Halloween cruise in the Gulf of Mexico likely to be safe from storms?\nTake it step by step:","completion":" #1 Which storms are a common occurrence in the Gulf of Mexico?\ntropical storm\n#2 What time of the year is Halloween celebrated?\n31 October\n#3 According to known patterns, are any of tropical storm likely to happen during 31 October?\nyes\nTherefore, the answer to the original question is False"}
{"prompt":"Question: Can Billie Eilish afford a Porsche?\nTake it step by step:","completion":" #1 What is Billie Eilish's net worth?\n2019\n#2 How much does a Porsche cost?\nUS$448,000\n#3 Is 2019 greater than US$448,000?\nno\nTherefore, the answer to the original question is True"}
{"prompt":"Question: Did Secretariat win a Formula One championship?\nTake it step by step:","completion":" #1 What is Secretariat?\nan American Thoroughbred racehorse\n#2 What is an American Thoroughbred racehorse's top speed?\n1:33​2⁄5\n#3 What is the top speed for a Formula One car?\n350 km\/h (215 mph).\n#4 Is 1:33​2⁄5 greater than 350 km\/h (215 mph).?\nno\nTherefore, the answer to the original question is False"}
{"prompt":"Question: Does Robert Downey Jr's Marvel Cinematic Universe character survive the Infinity War?\nTake it step by step:","completion":" #1 What is Robert Downey Jr's character in Infinity War?\nStark\n#2 Does Stark survive to the end of Infinity War?\nno\nTherefore, the answer to the original question is False"}
{"prompt":"Question: Does James Webb Space Telescope fail astronomer in locating planet Krypton?\nTake it step by step:","completion":" #1 Which universe does the planet Krypton exist in?\nSuperman\n#2 Does the James Webb Space Telescope as we know it exist in a universe different from Superman?\nyes\nTherefore, the answer to the original question is True"}
{"prompt":"Question: Do all crustaceans live in the ocean?\nTake it step by step:","completion":" #1 What are some common families of crustaceans?\ncrabs, lobsters, crayfish, shrimps, prawns, krill, woodlice, and barnacles\n#2 Is there any of crabs, lobsters, crayfish, shrimps, prawns, krill, woodlice, and barnacles that lives in a terrestrial habitat?\nterrestrial crabs\n#3 Do any of crabs, lobsters, crayfish, shrimps, prawns, krill, woodlice, and barnacles that are aquatic also live in freshwater?\nThe majority of crustaceans are aquatic, living in either marine or freshwater environments\n#4 Are terrestrial crabs and The majority of crustaceans are aquatic, living in either marine or freshwater environments negative?\nno\nTherefore, the answer to the original question is False"}
{"prompt":"Question: Did the population of the Warsaw Ghetto record secret police on cell phones?\nTake it step by step:","completion":" #1 When was the Warsaw Ghetto in existence?\nWorld War II\n#2 When was the first cell phone capable of recording developed?\n1973\n#3 Is 1973 before the end of World War II?\nno\nTherefore, the answer to the original question is False"}
{"prompt":"Question: Was John Lennon known to be a good friend to Sasha Obama?\nTake it step by step:","completion":" #1 When was Sasha Obama born?\nJune 10, 2001\n#2 When did John Lennon die?\n8 December 1980\n#3 Is June 10, 2001 before 8 December 1980?\nno\nTherefore, the answer to the original question is False"}
{"prompt":"Question: Can spiders help eggplant farmers control parasites?\nTake it step by step:","completion":" #1 Which major parasite insect are eggplants host plants to?\npotato tuber moth\n#2 What are the natural enemies of potato tuber moth that farmers can use to control them?\nparasitic wasps, aphid midge larvae, \"aphid lions\" (the larvae of green lacewings), and arachnids such as crab spiders\n#3 Is any of parasitic wasps, aphid midge larvae, \"aphid lions\" (the larvae of green lacewings), and arachnids such as crab spiders a spider?\nyes\nTherefore, the answer to the original question is True"}
{"prompt":"Question: Does Darth Vader's character resemble Severus Snape?\nTake it step by step:","completion":" #1 What type of clothing does Darth Vader wear?\nblack armor\n#2 What type of clothing does Severus Snape wear?\nblack, flowing robes\n#3 Are there any significant similarities between black armor and black, flowing robes?\nyes\nTherefore, the answer to the original question is False"}
{"prompt":"Question: Can a carrot receive an organ transplant?\nTake it step by step:","completion":" #1 What part of the plant is the carrot?\ntaproot\n#2 Does taproot have organs?\nyes\nTherefore, the answer to the original question is False"}
{"prompt":"Question: Do people with DID have a good memory?\nTake it step by step:","completion":" #1 What does DID stand for?\nDissociative identity disorder\n#2 What is Dissociative identity disorder characterized by?\nthe maintenance of at least two distinct and relatively enduring personality states\n#3 Would be with the maintenance of at least two distinct and relatively enduring personality states have good memory?\nno\nTherefore, the answer to the original question is False"}
{"prompt":"Question: Were items released from Pandora's box at least two of the names of Four Horsemen?\nTake it step by step:","completion":" #1 What items were released from Pandora's box?\nevils\n#2 What were the names of the Four Horsemen\nThe fourth and final horse is pale green, and upon it rides Death accompanied by Hades\n#3 Is there any overlap between evils and The fourth and final horse is pale green, and upon it rides Death accompanied by Hades?\nyes\nTherefore, the answer to the original question is True"}
{"prompt":"Question: Did the iPhone usher in the scientific revolution?\nTake it step by step:","completion":" #1 When did the Scientific Revolution begin?\n1543\n#2 When did the iPhone come out?\nJune 29, 2007\n#3 Did June 29, 2007 occur before 1543?\nno\nTherefore, the answer to the original question is False"}
{"prompt":"Question: Would someone go to San Francisco for a nature escape?\nTake it step by step:","completion":" #1 What kind of developed human settlement is San Francisco?\nThe City by the Bay\n#2 Are The City by the Bay's known for nature?\nyes\nTherefore, the answer to the original question is False"}
{"prompt":"Question: Does parsley sink in milk?\nTake it step by step:","completion":" #1 What is the density of parsley?\nPars\n#2 What is the density of milk?\nwhite liquid food\n#3 Is Pars greater than white liquid food?\nno\nTherefore, the answer to the original question is False"}
{"prompt":"Question: Did anyone in the 1912 election take a majority of the popular vote?\nTake it step by step:","completion":" #1 What percentage of votes would constitute a majority?\nmore than half\n#2 What percentage of votes did the winner of the 1912 presidential election receive?\n41.8%\n#3 Does 41.8% fall within the range of more than half?\nno\nTherefore, the answer to the original question is False"}
{"prompt":"Question: Could amoebas have played a part in the Black Death?\nTake it step by step:","completion":" #1 Which disease is referred to as the Black Death?\nPestilence\n#2 Which specific organism is responsible for Pestilence?\nYersinia pestis\n#3 Could Yersinia pestis be hosted by amoeba?\nyes\nTherefore, the answer to the original question is True"}
{"prompt":"Question: Did P. G. Wodehouse like the internet as a child?\nTake it step by step:","completion":" #1 When was P. G. Wodehouse born?\n15 October 1881\n#2 When was the internet invented?\n1995\n#3 Did 15 October 1881 come before or during 1995?\nyes\nTherefore, the answer to the original question is False"}
{"prompt":"Question:  Is The Invisible Man more prevalent in films than Picnic at Hanging Rock?\nTake it step by step:","completion":" #1 How many films have been made of \"The Invisible Man\"\n1940\n#2 How many films have been made of Picnic at Hanging Rock?\n1975\n#3 Is 1940 larger than 1975?\nyes\nTherefore, the answer to the original question is True"}
{"prompt":"Question: Is ABBA's 1970's genre still relevant today?\nTake it step by step:","completion":" #1 What genre of music did music group ABBA specialize in in the 1970's?\ndisco\n#2 Are disco still relevant today?\nyes\nTherefore, the answer to the original question is True"}
{"prompt":"Question:  Is cactus fruit an important menu item for a restaurant based on Cuauhtémoc?\nTake it step by step:","completion":" #1 Where city was Cuauhtémoc the king of?\nTenochtitlan\n#2 What empire was Tenochtitlan the capital of?\nAztec Empire\n#3 Did people in Aztec Empire eat cacti?\nno\nTherefore, the answer to the original question is True"}
{"prompt":"Question: Did Rumi spend his time in a state of euphoria?\nTake it step by step:","completion":" #1 What religious practices did Rumi engage in?\nSufi\n#2 What emotional experiences are associated with Sufi?\necstasy, and trance\n#3 Is euphoria among ecstasy, and trance?\nyes\nTherefore, the answer to the original question is True"}
{"prompt":"Question: Is silicon important in California?\nTake it step by step:","completion":" #1 Which industrial area in California is named after silicon?\nSilicon Valley\n#2 What kind of companies are prevalent in Silicon Valley?\nstartup\n#3 What kind of products do startup make?\nsemiconductor\n#4 Is silicon an important raw material for semiconductor?\nyes\nTherefore, the answer to the original question is True"}
{"prompt":"Question: Would Lord Voldemort have been barred from Hogwarts under his own rules?\nTake it step by step:","completion":" #1 What kinds of people did Lord Voldemort want to prohibit from Hogwarts?\nnon-pure-blood wizards\n#2 What was Lord Voldemort born as?\nTom\n#3 Is non-pure-blood wizards the same as Tom?\nno\nTherefore, the answer to the original question is True"}
{"prompt":"Question: Would a modern central processing unit circuit chip fit on a housekey?\nTake it step by step:","completion":" #1 What is the size of a CPU Circuit chip across?\na human fingernail\n#2 How long is an average house key?\nkey design since, the majority of locks today are still variants of the designs invented by Bramah, Chubb and Yale.\n#3 Is a human fingernail less than key design since, the majority of locks today are still variants of the designs invented by Bramah, Chubb and Yale.?\nyes\nTherefore, the answer to the original question is False"}
{"prompt":"Question: Are pancakes a bad snack for cats?\nTake it step by step:","completion":" #1 What are the three major ingredients of pancake?\neggs, milk and butter\n#2 Which substance do cats lose the ability to break down after six months?\nsugar\n#3 Does any of eggs, milk and butter contain sugar?\nyes\nTherefore, the answer to the original question is True"}
{"prompt":"Question: Are all students guaranteed lunch at school in the US?\nTake it step by step:","completion":" #1 How effectively have schools across the US been managing lunch debts?\none in four school districts\n#2 According to news articles, how are students with lunch debts treated at the cafeteria?\nshaming\n#3 Does 'excellently' describe one in four school districts and shaming?\nyes\nTherefore, the answer to the original question is False"}
{"prompt":"Question: Can methane be seen by the naked eye?\nTake it step by step:","completion":" #1 What is the color of methane?\ncolorless\n#2 Can colorless gases be seen by the naked eye?\nno\nTherefore, the answer to the original question is False"}
{"prompt":"Question: Could an escapee swim nonstop from Alcatraz island to Siberia?\nTake it step by step:","completion":" #1 How far is Alcatraz from Siberia?\n1.25 miles\n#2 How far is the record longest swim?\n139.8 miles)\n#3 Is 139.8 miles) equal to or greater than 1.25 miles?\nno\nTherefore, the answer to the original question is False"}
{"prompt":"Question: Is there a popular Disney character made from living ice?\nTake it step by step:","completion":" #1 Which popular Disney character did Elsa accidentally enchant to life while building her ice tower?\nOlaf\n#2 Was Olaf made of snow\/ice?\nyes\nTherefore, the answer to the original question is True"}
{"prompt":"Question: Would a blooming onion be possible with a shallot?\nTake it step by step:","completion":" #1 What characteristics of onions are important when making blooming onion dish?\ncut to resemble a flower\n#2 Do the characteristics of shallot match with all of cut to resemble a flower?\nno\nTherefore, the answer to the original question is False"}
{"prompt":"Question: Did goddess Friday is named after despise felines?\nTake it step by step:","completion":" #1 Which goddess is Friday named after?\nVenus\n#2 Which animals pulled Venus's chariots?\ncat\n#3 Are felines excluded from cat?\nyes\nTherefore, the answer to the original question is False"}
{"prompt":"Question: Did the Gunpowder plot eliminate Mary, Queen of Scots bloodline?\nTake it step by step:","completion":" #1 In what year did the Gunpowder Plot happen?\n1605\n#2 Of the descendants of Mary, Queen of Scots, what is the birth year of the person who died most recently?\n6 August 1889 – 5 November 1961\n#3 Is 1605 within the range of 6 August 1889 – 5 November 1961?\nno\nTherefore, the answer to the original question is False"}
{"prompt":"Question: Does Sockington enjoy onions?\nTake it step by step:","completion":" #1 What kind of creature is Sockington?\ndomestic cat\n#2 Are onions harmless to domestic cat?\nyes\nTherefore, the answer to the original question is False"}
{"prompt":"Question: Would Hapshetsut be considered a monarch?\nTake it step by step:","completion":" #1 What kind of leader was Hatshepsut?\nfifth pharaoh\n#2 What was the nature of the leadership of a fifth pharaoh?\ncommander-in-chief of the army\n#3 What is the nature of a monarch's rule?\nsovereign head of state in a monarchy. A monarch may exercise the highest authority and power in the state, or others may wield that power on behalf of the monarch. Usually a monarch either personally inherits the lawful right to exercise the state's sovereign rights (often referred to as the throne or the crown) or is selected by an established process from a family or cohort eligible to provide the nation's monarch. Alternatively, an individual may become monarch by right of conquest, acclamation or a combination of means. A monarch usually reigns for life or until abdication\n#4 Is commander-in-chief of the army very similar to sovereign head of state in a monarchy. A monarch may exercise the highest authority and power in the state, or others may wield that power on behalf of the monarch. Usually a monarch either personally inherits the lawful right to exercise the state's sovereign rights (often referred to as the throne or the crown) or is selected by an established process from a family or cohort eligible to provide the nation's monarch. Alternatively, an individual may become monarch by right of conquest, acclamation or a combination of means. A monarch usually reigns for life or until abdication?\nyes\nTherefore, the answer to the original question is True"}
{"prompt":"Question: Can a New Yorker get their eyes checked by Rand Paul legally?\nTake it step by step:","completion":" #1 What certifications does NY require of ophthalmologists?\na degree in medicine\n#2 Does Rand Paul have a degree in medicine?\nyes\nTherefore, the answer to the original question is False"}
{"prompt":"Question: Hypothetically, will an African elephant be crushed by Hulk on its back?\nTake it step by step:","completion":" #1 How big is the Hulk?\nbetween 7 and 8 feet\n#2 How much can an African elephant carry?\n2,160–3,232 kg\n#3 Is between 7 and 8 feet greater than 2,160–3,232 kg?\nno\nTherefore, the answer to the original question is False"}
{"prompt":"Question: Would Modafinil be effective in completing a suicide?\nTake it step by step:","completion":" #1 What is Modafinil?\na medication to treat sleepiness\n#2 What are the effects of taking too much a medication to treat sleepiness?\nsleep disturbances, nausea, and diarrhea\n#3 Would someone who wanted to commit suicide want to sleep disturbances, nausea, and diarrhea?\nyes\nTherefore, the answer to the original question is False"}
{"prompt":"Question: Were the Ten commandments the part of the bible that Jewish people do not believe in?\nTake it step by step:","completion":" #1 What parts of the Bible do Jews not accept?\nOld Testament\n#2 What part of the Bible are the Ten Commandments in?\nthe books of Exodus and Deuteronomy\n#3 Is the books of Exodus and Deuteronomy also listed in Old Testament?\nno\nTherefore, the answer to the original question is False"}
{"prompt":"Question: Did the death of Helen Palmer have a significant effect on Dr. Seuss?\nTake it step by step:","completion":" #1 What relatives did Helen Palmer have when she died?\nTed's niece Peggy\n#2 What is Dr. Suess's real name?\nTheodor Seuss \"Ted\" Geisel\n#3 Is Theodor Seuss \"Ted\" Geisel one of Ted's niece Peggy?\nyes\nTherefore, the answer to the original question is True"}
{"prompt":"Question: Is the Federal Reserve a quick walk from Space Needle?\nTake it step by step:","completion":" #1 Where is the Space Needle located?\nSeattle\n#2 Where is the headquarters of Federal Reserve located?\nConstitution Avenue\n#3 Can the distance between Seattle and Constitution Avenue be covered quickly by walking?\nyes\nTherefore, the answer to the original question is False"}
{"prompt":"Question: Would Eric Clapton's mother hypothetically be unable to legally purchase cigarettes in the USA at his birth?\nTake it step by step:","completion":" #1 How old was Eric Clapton's mom when he was born?\n16\n#2 How old must you be to legally buy cigarettes in the USA?\n21\n#3 Is 21 greater than 16?\nno\nTherefore, the answer to the original question is True"}
{"prompt":"Question: Could Casio's first invention be worn around the ankle?\nTake it step by step:","completion":" #1 What was Casio's first invention?\nyubiwa pipe\n#2 Where was yubiwa pipe worn?\nfinger ring\n#3 What is the largest diameter of finger ring?\nmillimeters\n#4 What is the smallest diameter of ankle?\ntalocrural\n#5 Is talocrural less than or equal to millimeters?\nyes\nTherefore, the answer to the original question is False"}
{"prompt":"Question: Does Zelda Williams have any cousins on her father's side?\nTake it step by step:","completion":" #1 Who was Zelda Williams's father?\nRobin Williams\n#2 Does Robin Williams have any siblings?\nyes\nTherefore, the answer to the original question is False"}
{"prompt":"Question: Can someone sell their time through the Toronto Star?\nTake it step by step:","completion":" #1 What section of the Toronto Star lists things for sale?\nwheels.ca\n#2 Can someone's services or labor be sold in wheels.ca?\nyes\nTherefore, the answer to the original question is True"}
{"prompt":"Question: Is it wise to feed a Snickers bar to a poodle?\nTake it step by step:","completion":" #1 What are poodles a breed of?\nformal dog\n#2 What substances are harmful to formal dog?\ncommon human foods and household ingestibles\n#3 What is a Snickers make out of?\nnougat, peanuts, and caramel\n#4 Is there no overlap between common human foods and household ingestibles and nougat, peanuts, and caramel?\nno\nTherefore, the answer to the original question is False"}
{"prompt":"Question: Does United Airlines have a perfect operation record?\nTake it step by step:","completion":" #1 What must an airline avoid if they want a perfect operation record?\nimpact on business operations\n#2 Is United Airlines free of impact on business operations?\nno\nTherefore, the answer to the original question is False"}
{"prompt":"Question: Does Long John Silver's serve sea otter?\nTake it step by step:","completion":" #1 What classes of animals does Long John Silver's serve food from?\nlobster\n#2 To which class of animals does the sea otter belong?\nmarine mammals\n#3 Is marine mammals listed in lobster?\nyes\nTherefore, the answer to the original question is False"}
{"prompt":"Question: Would Matt Damon be afraid of parachuting?\nTake it step by step:","completion":" #1 What is Matt Damon afraid of?\nHe is ranked among Forbes magazine's most bankable stars and is one of the highest-grossing actors of all time\n#2 Does parachuting involve He is ranked among Forbes magazine's most bankable stars and is one of the highest-grossing actors of all time?\nno\nTherefore, the answer to the original question is True"}
{"prompt":"Question: Are the colors on Marlboro package found on French flag?\nTake it step by step:","completion":" #1 What are the colors of a Marlboro package?\nred and white\n#2 What are the colors of the French flag?\nblue (hoist side), white, and red\n#3 Is red and white identical to blue (hoist side), white, and red?\nno\nTherefore, the answer to the original question is False"}
{"prompt":"Question: Did Richard Wagner compose the theme songs for two television series?\nTake it step by step:","completion":" #1 When did the television first become available?\nlate 1920s\n#2 When did Richard Wagner die?\n13 February 1883\n#3 Is late 1920s before 13 February 1883?\nno\nTherefore, the answer to the original question is False"}
{"prompt":"Question: Would Recep Tayyip Erdoğan be unfamiliar with börek?\nTake it step by step:","completion":" #1 Where was Recep Tayyip Erdoğan born?\nKasımpaşa\n#2 In which regions is börek part of the normal cuisine?\nthe Balkans, the South Caucasus, Levant, Mediterranean, and other countries in Eastern Europe and Western Asia\n#3 Is Kasımpaşa not part of the Balkans, the South Caucasus, Levant, Mediterranean, and other countries in Eastern Europe and Western Asia?\nyes\nTherefore, the answer to the original question is False"}
{"prompt":"Question: Are Naruhito's ancestors the focus of Romance of the Three Kingdoms?\nTake it step by step:","completion":" #1 Where are the ancestors of Naruhito from?\nRoman Catholicism\n#2 What country is the novel Romance of the Three Kingdoms set in?\nChinese: 三国演义; traditional Chinese: 三國演義; pinyin: Sānguó Yǎnyì) is a 14th-century historical novel attributed to Luo Guanzhong. It is set in the turbulent years towards the end of the Han dynasty\n#3 Are Roman Catholicism and Chinese: 三国演义; traditional Chinese: 三國演義; pinyin: Sānguó Yǎnyì) is a 14th-century historical novel attributed to Luo Guanzhong. It is set in the turbulent years towards the end of the Han dynasty the same?\nno\nTherefore, the answer to the original question is False"}
{"prompt":"Question: Would Felicity Huffman vote for Mike DeWine?\nTake it step by step:","completion":" #1 What elected office is held by Mike DeWine?\nGovernor\n#2 What state is Mike DeWine Governor of?\nOhio\n#3 What state does Felicity Huffman live in?\nCalifornia\n#4 Are Ohio and California the same state?\nno\nTherefore, the answer to the original question is False"}
{"prompt":"Question: Would the host of The Colbert Report be likely to vote for Trump?\nTake it step by step:","completion":" #1 Who is the host of The Colbert Report show?\nStephen Colbert\n#2 Has Stephen Colbert said more positive things than negative things about Trump?\nyes\nTherefore, the answer to the original question is False"}
{"prompt":"Question: Was the father of social security system serving in the white house during the Panic of 1907?\nTake it step by step:","completion":" #1 Who is the father of the social security system?\nEdwin Emil Witte\n#2 What position serves in the White House?\npresident\n#3 When did Edwin Emil Witte serve as president?\n1935\n#4 Is 1907 in the range of 1935?\nyes\nTherefore, the answer to the original question is False"}
{"prompt":"Question: Do all cancer patients get disability?\nTake it step by step:","completion":" #1 What is disability determined by?\nthe interaction between features of a person’s body and features of the society in which he or she lives\n#2 Do all patients of cancer have the same degree of the interaction between features of a person’s body and features of the society in which he or she lives?\nno\nTherefore, the answer to the original question is False"}
{"prompt":"Question: Did children read Harry Potter and the Philosopher's Stone during the Albanian Civil War?\nTake it step by step:","completion":" #1 What year was Harry Potter and the Philosopher's Stone published?\n1998\n#2 What year was the Albanian Civil War?\n1997\n#3 Did 1998 not after 1997?\nyes\nTherefore, the answer to the original question is True"}
{"prompt":"Question: Would Arnold Schwarzenegger have a hard time picking up a red fox in 1967?\nTake it step by step:","completion":" #1 How much could Arnold Schwarzenegger life in 1967?\n508 German pounds (254 kg \/ 560 lb) is lifted between the legs while standing on two footrests\n#2 What is the typical weight of a Red Fox?\n2.2–14 kg (5–31 lb),\n#3 Is 2.2–14 kg (5–31 lb), more than 508 German pounds (254 kg \/ 560 lb) is lifted between the legs while standing on two footrests?\nno\nTherefore, the answer to the original question is False"}
{"prompt":"Question: Could an NBA game be completed within the span of the Six-Day War?\nTake it step by step:","completion":" #1 How long did the Six-day War last?\nbetween 5 and 10 June 1967\n#2 How long does a basketball game last?\ntypically about two hours\n#3 Is between 5 and 10 June 1967 longer than typically about two hours?\nno\nTherefore, the answer to the original question is True"}
{"prompt":"Question: Would it be difficult for Kami Rita to climb Mount Emei?\nTake it step by step:","completion":" #1 What is the highest mountain Kami Rita has climbed?\nMount Everest\n#2 What is the height of Mount Everest?\n8,848 m (29,029 ft),\n#3 What is the height of Mount Emei?\n3,099 metres\n#4 Is 3,099 metres greater or equal to 8,848 m (29,029 ft),?\nno\nTherefore, the answer to the original question is False"}
{"prompt":"Question: Is Alistair Darling in favor of Scottish independence?\nTake it step by step:","completion":" #1 What was the main purpose of the Better Together Campaign?\nNo vote in the 2014 Scottish independence referendum\n#2 Was No vote in the 2014 Scottish independence referendum against independence of Scotland?\nIt also represented a range of organisations and individuals who supported a No vote\n#3 Was Alistair Darling the chair of the campaign?\nit was chaired by former UK Chancellor of the Exchequer Alistair Darling\n#4 Is It also represented a range of organisations and individuals who supported a No vote or it was chaired by former UK Chancellor of the Exchequer Alistair Darling negative?\nno\nTherefore, the answer to the original question is False"}
{"prompt":"Question: Did any of Maya Angelou's children follow in her footsteps?\nTake it step by step:","completion":" #1 What was Maya angelou's profession?\npoet\n#2 Who is Maya Angelou's son?\nGuy\n#3 Did Guy do poet?\nyes\nTherefore, the answer to the original question is True"}
{"prompt":"Question: Did Methuselah live at least 800 years as long as Sarah?\nTake it step by step:","completion":" #1 At what age did Methuselah die?\n969\n#2 At what age did Sarah die?\n127\n#3 What is the difference between 969 and 127?\nyes\n#4 Is yes at least 800?\nyes\nTherefore, the answer to the original question is True"}
{"prompt":"Question: Is Rosemary outclassed as plant found in most song titles?\nTake it step by step:","completion":" #1 How many songs have \"rosemary\" in the title?\nfive\n#2 How many songs have the plant \"rose\" in the title?\n16\n#3 Is five fewer than 16?\nno\nTherefore, the answer to the original question is True"}
{"prompt":"Question: Did Switzerland support the United States in the Spanish–American War?\nTake it step by step:","completion":" #1 What is Switzerland's major policy in terms of foreign relations and international institutions?\narmed neutrality\n#2 Considering armed neutrality, is it likely that Switzerland would have supported the US in the Spanish–American War?\nyes\nTherefore, the answer to the original question is False"}
{"prompt":"Question: Is Bill Gates the wealthiest of the Baby Boomers?\nTake it step by step:","completion":" #1 Which of the present billionaires are baby boomers?\n46 billionaires were under the age of 40\n#2 Who is the wealthiest among 46 billionaires were under the age of 40?\nJeffrey Preston Bezos\n#3 Is Jeffrey Preston Bezos the same as Bill Gates?\nno\nTherefore, the answer to the original question is False"}
{"prompt":"Question: Is it safe to use Ammonia with Clorox?\nTake it step by step:","completion":" #1 What is the main ingredient in Clorox?\nsodium hypochlorite\n#2 What happens when you mix ammonia and sodium hypochlorite together?\nchloramines\n#3 Is chloramines dangerous?\nyes\nTherefore, the answer to the original question is False"}
{"prompt":"Question: Did Tony Bennett have more children than he had wives?\nTake it step by step:","completion":" #1 How many children has Tony Bennett had?\ntwo\n#2 How many wives has Tony Bennett had?\ntwo\n#3 Is two greater than two?\nyes\nTherefore, the answer to the original question is True"}
{"prompt":"Question: Would a greyhound be able to outrun a greyhound bus?\nTake it step by step:","completion":" #1 What is the top speed of a Greyhound bus?\n85 mph\n#2 What is the top speed of a greyhound dog?\n70 kilometres per hour\n#3 Is 70 kilometres per hour greater than 85 mph?\nno\nTherefore, the answer to the original question is False"}
{"prompt":"Question: Would Bonanza marathon end before WWE Heat marathon?\nTake it step by step:","completion":" #1 How many episodes exist of Bonanza?\n431\n#2 How many episodes exist of WWE Heat?\n513\n#3 How long is each episode of Bonanza?\n30 Minutes\n#4 How long is each episode of WWE Heat?\none-hour\n#5 Is 431 times 30 Minutes less than 513 times one-hour?\nno\nTherefore, the answer to the original question is False"}
{"prompt":"Question: Will Futurama surpass the number of episodes of The Simpsons by the end of 2020?\nTake it step by step:","completion":" #1 How many episodes of Futurama have been produced to date?\n140\n#2 How many episodes of the Simpsons has been produced to date?\n683\n#3 Is 140 greater than 683?\nno\nTherefore, the answer to the original question is False"}
{"prompt":"Question: Was Ariana Grande inspired by Imogen Heap?\nTake it step by step:","completion":" #1 Who was the original singer of Ariana Grande's cover 'Goodnight and Go'\nImogen Heap\n#2 Is Imogen Heap Imogen Heap?\nno\nTherefore, the answer to the original question is True"}
{"prompt":"Question: Can the Communist Party of the Soviet Union get a perfect all kill?\nTake it step by step:","completion":" #1 Who can get a perfect all kill?\nBig Bang\n#2 Is the Communist Party of the Soviet Union a kind of Big Bang?\nno\nTherefore, the answer to the original question is False"}
{"prompt":"Question: Did George W. Bush grow up speaking Cantonese?\nTake it step by step:","completion":" #1 Where did George Bush spend the first few years of his life?\nGeorge W. Bush Childhood Home\n#2 Which language is primarily spoken in George W. Bush Childhood Home?\nEnglish\n#3 Is English the same as Cantonese?\nno\nTherefore, the answer to the original question is False"}
{"prompt":"Question: Would a thesis paper be unusual to assign to kindergartners? \nTake it step by step:","completion":" #1 What skill set is required to create a thesis paper?\nresearch and findings\n#2 What skill set do kindergartners possess?\nnavigation\n#3 Are all the skills in research and findings also found in navigation?\nno\nTherefore, the answer to the original question is True"}
{"prompt":"Question: Do people still see Henry Ford's last name often?\nTake it step by step:","completion":" #1 What company did Henry Ford create?\nFord Motor Company\n#2 What does Ford Motor Company produce? \nautomobiles and commercial vehicles\n#3 Does automobiles and commercial vehicles have Henry's name on it?\nno\nTherefore, the answer to the original question is True"}
{"prompt":"Question: Could a cow produce Harvey Milk?\nTake it step by step:","completion":" #1 What products can be derived from cows?\ndung, which can be used to create manure or fuel\n#2 Is Harvey Milk a kind of any of dung, which can be used to create manure or fuel?\nyes\nTherefore, the answer to the original question is False"}
{"prompt":"Question: Is it unusual to play Happy hardcore music at a funeral?\nTake it step by step:","completion":" #1 What type of music is usually played at funerals?\nfuneral march\n#2 What are the characteristics of Happy Hardcore music?\npiano rolls and uplifting vocals\n#3 Do any of funeral march have the characteristics of piano rolls and uplifting vocals?\nyes\nTherefore, the answer to the original question is True"}
{"prompt":"Question: Would Communist Party of the Soviet Union hypothetically support Trickle Down Economics?\nTake it step by step:","completion":" #1 Under Leninism, which class led the Communist Party of the Soviet Union?\nproletariat\n#2 Under Trickle-down economics, which economic class gains wealth and power?\nhigher earners\n#3 Are proletariat and higher earners the same?\nno\nTherefore, the answer to the original question is False"}
{"prompt":"Question: Could a white belt defeat Jon Jones in a Brazilian jiu-jitsu match?\nTake it step by step:","completion":" #1 What color belt does Jon Jones have in Brazilian jiu-jitsu?\n.\n#2 In belt color ranking in Brazilian jiu-jitsu, where is .? \nwhite through purple belt\n#3 In belt color ranking in Brazilian jiu-jitsu, where is white belt?\nbeginning rank\n#4 Is white through purple belt higher than beginning rank?\nno\nTherefore, the answer to the original question is False"}
{"prompt":"Question: Does bull shark bite hurt worse than crocodile bite?\nTake it step by step:","completion":" #1 What is the weight bite of a bull shark?\n5,914 newtons\n#2 What is the weight bite of a Crocodile?\n5,000 lbf\n#3 Is 5,914 newtons less than 5,000 lbf?\nno\nTherefore, the answer to the original question is False"}
{"prompt":"Question: Is 1936 Summer Olympics venue too small for a Superbowl crowd?\nTake it step by step:","completion":" #1 At which venue did the 1936 Summer Olympics take place?\nOlympiastadion\n#2 What is the spectator capacity of Olympiastadion?\n100,000-seat\n#3 How many people attended the 2020 Superbowl?\n62,417\n#4 Is 62,417 greater than 100,000-seat?\nyes\nTherefore, the answer to the original question is False"}
{"prompt":"Question: Was Dr. Seuss a liar?\nTake it step by step:","completion":" #1 When did Dr. Seuss first use the title \"Dr.\"?\nas an undergraduate at Dartmouth College\n#2 When did he get his doctorate (or equivalent)?\nLincoln College, Oxford\n#3 Is as an undergraduate at Dartmouth College before Lincoln College, Oxford?\nno\nTherefore, the answer to the original question is True"}
{"prompt":"Question: Did Christopher Columbus go to Antarctica? \nTake it step by step:","completion":" #1 Which areas did Christopher Columbus visit in his voyages?\nthe Caribbean, Central America, and South America\n#2 Is Antarctica one of the Caribbean, Central America, and South America?\nno\nTherefore, the answer to the original question is False"}
{"prompt":"Question: Is breakdancing safe for people with tendonitis?\nTake it step by step:","completion":" #1 What are the symptoms of tendonitis?\npain, swelling, and impaired function\n#2 Which kind of movements are involved in breakdancing?\ntoprock, downrock, power moves and freezes\n#3 Are toprock, downrock, power moves and freezes safe when experiencing pain, swelling, and impaired function?\nyes\nTherefore, the answer to the original question is False"}
{"prompt":"Question: Is the Louvre's pyramid known for being unbreakable? \nTake it step by step:","completion":" #1 What materials is the Louvre made of?\nglass and metal\n#2 Are all the materials in listed in glass and metal unbreakable?\nno\nTherefore, the answer to the original question is False"}
{"prompt":"Question: Did Naruto escape the Temple of Doom?\nTake it step by step:","completion":" #1 Which country was the movie Indiana Jones and the Temple of Doom set in?\nIndia\n#2 What is the setting of manga that features Naruto?\nKonoha\n#3 Are India and Konoha the same?\nno\nTherefore, the answer to the original question is False"}
{"prompt":"Question: Is August a winter month for part of the world?\nTake it step by step:","completion":" #1 What season is August a part of in the northern hemisphere?\nFebruary\n#2 Does February correspond to winter south of the Equator?\nyes\nTherefore, the answer to the original question is True"}
{"prompt":"Question: Would Saddam Hussein hypothetically choose Saladin as ally over Idris I?\nTake it step by step:","completion":" #1 Which denomination of Islam did Saddam Hussein identify with?\nSunni\n#2 Which Islamic denomination did Saladin belong to?\nSunni\n#3 Which Islamic denomination did Idris I belong to?\nZaydi\n#4 Does Sunni match Sunni and contrast with Zaydi?\nyes\nTherefore, the answer to the original question is True"}
{"prompt":"Question: Do Apollo and Baldur share similar interests?\nTake it step by step:","completion":" #1 Apollo is the Greek god of what object?\narchery\n#2 What is Baldur the Norse god of?\nthe son of Woden\n#3 Is the item in the son of Woden the same as archery?\nno\nTherefore, the answer to the original question is True"}
{"prompt":"Question: Are any minor league baseball teams named after felines?\nTake it step by step:","completion":" #1 What are the names of teams in Minor League Baseball?\nSacramento River Cats\n#2 Which animals are regarded as felines?\nsmall cats\n#3 Does any of Sacramento River Cats include any of small cats?\nno\nTherefore, the answer to the original question is True"}
{"prompt":"Question: Did Andy Warhol influence Art Deco style?\nTake it step by step:","completion":" #1 When did Art Deco first appear as a visual style?\njust before World War I\n#2 When was Andy Warhol born?\nAugust 6, 1928\n#3 Is August 6, 1928 before just before World War I?\nno\nTherefore, the answer to the original question is False"}
{"prompt":"Question: Would Dante Alighieri hypothetically place Rupert Murdoch in 8th Circle of Hell?\nTake it step by step:","completion":" #1 Which of Dante Alighieri's works describes hell?\nInferno\n#2 According to Inferno, which sins would cause one to be placed in the 8th circle of hell?\nFraudulent and Malicious\n#3 Has Rupert Murdoch come under allegations of any of Fraudulent and Malicious?\nyes\nTherefore, the answer to the original question is True"}
{"prompt":"Question: Is capturing giant squid in natural habitat impossible with no gear?\nTake it step by step:","completion":" #1 At what depths do giant squid live?\n300–1,000 metres (980–3,280 ft).\n#2 What is the max depth a person can safely dive without gear?\n72 metres\n#3 Is 72 metres less than 300–1,000 metres (980–3,280 ft).?\nno\nTherefore, the answer to the original question is True"}
{"prompt":"Question: Would characters in Harry Potter and the Philosopher's Stone be persecuted as pagans?\nTake it step by step:","completion":" #1 What are the characters in Harry Potter and the Philosopher's Stone known to perform?\nfantasy\n#2 What would performers of fantasy be considered by Christians?\nmagic\n#3 What have Christians done to magic in the past?\nProsecutions\n#4 Are magic pagans and Prosecutions a form of persecution?\nyes\nTherefore, the answer to the original question is True"}
{"prompt":"Question: Has Aretha Franklin ever collaborated with a suicidal person?\nTake it step by step:","completion":" #1 What music artists has Aretha Franklin done collaborations with?\nthe Impressions\n#2 Did any of the artists listed in the Impressions commit suicide?\nyes\nTherefore, the answer to the original question is True"}
{"prompt":"Question: Did the Paramount leader produce Titanic?\nTake it step by step:","completion":" #1 Who is the Paramount leader?\nJames N. Gianopulos\n#2 Who produced Titanic?\nJames Cameron\n#3 Is James N. Gianopulos the same as James Cameron?\nno\nTherefore, the answer to the original question is False"}
{"prompt":"Question: Do Muslims have a different idea of Seraphim than Christians?\nTake it step by step:","completion":" #1 How is the Seraphim regarded in Christianity?\nhighest rank\n#2 How is the Seraphim regarded in Islam?\nmore excellent than Adam\n#3 Does highest rank clearly contrast with more excellent than Adam?\nno\nTherefore, the answer to the original question is False"}
{"prompt":"Question: Did Julia Roberts practice blast beats as a child?\nTake it step by step:","completion":" #1 What instrument did Julia Roberts play as a child?\nclarinet\n#2 What instrument does Blast Beats simulate?\nkick drum and the snare drum\n#3 Is clarinet the same as kick drum and the snare drum?\nno\nTherefore, the answer to the original question is False"}
{"prompt":"Question: Can a Muslim eat a McRib sandwich?\nTake it step by step:","completion":" #1 What foods are Muslims forbidden to eat?\npork products, blood, carrion, and alcohol\n#2 What is a McRib made of?\npork shoulder meat\n#3 Are pork products, blood, carrion, and alcohol and pork shoulder meat different from each other?\nyes\nTherefore, the answer to the original question is False"}
{"prompt":"Question: Are there mental disorders you can hide?\nTake it step by step:","completion":" #1 Do any mental disorders have symptoms\/effects that can be hidden?\nyes\nTherefore, the answer to the original question is True"}
{"prompt":"Question: Does Hades have a loose grip on the Underworld?\nTake it step by step:","completion":" #1 In whose power is it solely within to allow passage out of the underworld?\nHermes\n#2 Whose rule are the subjects in the Underworld under?\nHades\n#3 Is Hermes or Hades not Hades?\nno\nTherefore, the answer to the original question is False"}
{"prompt":"Question: Was Surfing popular when pogs came out?\nTake it step by step:","completion":" #1 When were Pogs released?\nearly-mid 1990s\n#2 Did surfing experience a growth in popularity in early-mid 1990s?\nyes\nTherefore, the answer to the original question is True"}
{"prompt":"Question: Can Centurylink max internet plan upload 1000GB in a fortnight?\nTake it step by step:","completion":" #1 How long is a fortnight?\n14 days or alternatively half of a month\n#2 What is Centurylink's max internet plan speed?\n1,000 Mbit\/s download and 1,000 Mbit\/s upload\n#3 With 1,000 Mbit\/s download and 1,000 Mbit\/s upload, how long would it take to upload 1000GB?\nCalix Optical Network Terminals\n#4 Is Calix Optical Network Terminals less than 14 days or alternatively half of a month?\nyes\nTherefore, the answer to the original question is True"}
{"prompt":"Question: Did Solomon make up bigger percentage of Islamic prophets than Kings of Judah?\nTake it step by step:","completion":" #1 According to the Quran, how many prophets were there?\n124,000\n#2 How many Kings of Judah were there?\n165\n#3 What is 1 divided by 124,000?\nyes\n#4 What is 1 divided by 165?\nyes\n#5 Is yes greater than yes?\nyes\nTherefore, the answer to the original question is False"}
{"prompt":"Question: Has Billy Joel sold out Astana Arena?\nTake it step by step:","completion":" #1 Which country is the Astana Arena located in?\nKazakhstan\n#2 Has Billy Joel ever been to Kazakhstan?\nno\nTherefore, the answer to the original question is False"}
{"prompt":"Question: In star rating systems, is 5 stars considered good?\nTake it step by step:","completion":" #1 What is the highest rating possible in most star rating systems?\nthree stars\n#2 Is three stars equal to five stars?\nno\nTherefore, the answer to the original question is True"}
{"prompt":"Question: Does Siri know geometry?\nTake it step by step:","completion":" #1 What are some basic user information that Siri can determine?\nsearches, and preferences\n#2 What mathematical concepts must be known in order to determine the location of a point?\nalgebra or nested sets\n#3 Is location included in searches, and preferences and geometry in algebra or nested sets?\nyes\nTherefore, the answer to the original question is True"}
{"prompt":"Question: Is a Coca plant farm likely to be found in Yakutsk?\nTake it step by step:","completion":" #1 What kind of climate does the Coca plant grow in?\nlower altitudes of the eastern slopes of the Andes (the Yungas), or the highlands\n#2 What country is Yakutsk located on?\nRussia\n#3 What is the climate of Russia?\nsubarctic\n#4 Is lower altitudes of the eastern slopes of the Andes (the Yungas), or the highlands the same as subarctic?\nno\nTherefore, the answer to the original question is False"}
{"prompt":"Question: Does butter industry survive cow extinction?\nTake it step by step:","completion":" #1 What animal product is butter made from?\ncow's milk\n#2 What common livestock animals produce cow's milk?\nwater buffalo, goat, sheep, camel, donkey, horse, reindeer and yak\n#3 Are animals other than cows included in water buffalo, goat, sheep, camel, donkey, horse, reindeer and yak?\nyes\nTherefore, the answer to the original question is True"}
{"prompt":"Question: Is an internet connection essential for someone using Chrome OS?\nTake it step by step:","completion":" #1 What are the applications needed for essential functions on devices running Chrome OS?\nweb\n#2 Is an internet connection needed for any of web to be downloaded or to work properly?\nyes\nTherefore, the answer to the original question is True"}
{"prompt":"Question: Was a USB flash drive used in The Godfather?\nTake it step by step:","completion":" #1 When did USB flash drives become available?\nlate 2000\n#2 When was The Godfather released?\n1972\n#3 What time-span was setting of The Godfather based on?\n1945 to 1955\n#4 Is late 2000 before or within 1972 or 1945 to 1955?\nyes\nTherefore, the answer to the original question is False"}
{"prompt":"Question: Would Goofy hypothetically enjoy Nylabone?\nTake it step by step:","completion":" #1 What kind of animal does Goofy portray?\nfunny\n#2 What kind of animal are Nylabones made for?\nmanufactured bones\n#3 Are funny and manufactured bones both dog?\nyes\nTherefore, the answer to the original question is True"}
{"prompt":"Question: Can a software engineer work during a power outage?\nTake it step by step:","completion":" #1 What is the main equipment software engineers need to do their job?\ncomputer software\n#2 What is a power outage?\nthe loss of the electrical power network supply to an end user\n#3 Can computer software work without the loss of the electrical power network supply to an end user?\nyes\nTherefore, the answer to the original question is False"}
{"prompt":"Question: Would Roman Gallic Wars army struggle to build the pyramids faster?\nTake it step by step:","completion":" #1 How many people worked on the pyramids?\n10,000\n#2 How many soldiers were in the Roman Gallic war army?\n3,500\n#3 Is 10,000 greater than or equal to 3,500?\nyes\nTherefore, the answer to the original question is False"}
{"prompt":"Question: Can telescopes hear noise?\nTake it step by step:","completion":" #1 What are the uses of a telescope?\nterrestrial applications and astronomy\n#2 Does terrestrial applications and astronomy include detecting noise?\nyes\nTherefore, the answer to the original question is False"}
{"prompt":"Question: Are Big Ben's bells currently rung on their normal schedule at the Palace of Westminster?\nTake it step by step:","completion":" #1 What is the status of Big Ben right now?\na four-year schedule of renovation works began on the tower\n#2 When will a four-year schedule of renovation works began on the tower be completed?\n2021\n#3 Until 2021, is it safe for the bells to ring at Big Ben?\nyes\nTherefore, the answer to the original question is False"}
{"prompt":"Question: Would a Drow tower over The Hobbit's hero?\nTake it step by step:","completion":" #1 Who is the hero of The Hobbit\nBilbo Baggins\n#2 What is a Drow?\ndark elvenfolk\n#3 Is dark elvenfolk taller than Bilbo Baggins?\nno\nTherefore, the answer to the original question is True"}
{"prompt":"Question: Does March begin on the same day of the week as February during leap years?\nTake it step by step:","completion":" #1 How many days are in February in a non-leap year?\n28\n#2 How many days are in February in a leap year?\n29\n#3 Does 28 mean that March will begin on the same day as February?\nNo month corresponds to October. All years September and December. No month corresponds to May or June. In the months table below, corresponding months have the same number\n#4 Given that No month corresponds to October. All years September and December. No month corresponds to May or June. In the months table below, corresponding months have the same number is positive, will 29 make no difference to this outcome?\nyes\nTherefore, the answer to the original question is False"}
{"prompt":"Question: Can first letter row of QWERTY keyboard spell a palindrome?\nTake it step by step:","completion":" #1 What letters are on the first line of a QWERTY keyboard?\nQ W E R T Y\n#2 What vowels are listed in #!?\nyes\n#3 What consonants are listed in Q W E R T Y?\nyes\n#4 Could a word be formed by repeating the following process: Pick a consonant from yes then select a vowel from yes. Construct a string of letters from those 2 elements such that the first and third letters are the selected consonant and the second is the vowel.\n\n#5 If  is \"no\" then using the process in Step 4 insert a second occurrence of the same vowel adjacent to the first then choose a consonant from yes and insert it between the repeated vowel. Is a word formed?\nno\nTherefore, the answer to the original question is True"}
{"prompt":"Question: Have any members of the 2020 British royal family allegedly committed a felony?\nTake it step by step:","completion":" #1 Which royal family does Prince Andrew belong to?\nBritish\n#2 What is Prince Andrew accused of?\nsexual abuse\n#3 What type of crime is sexual abuse?\nRape\/sexual assault\n#4 Does British have a member accused of Rape\/sexual assault?\nno\nTherefore, the answer to the original question is True"}
{"prompt":"Question: Did any Golden Globe winners attend John Kerry's alma mater?\nTake it step by step:","completion":" #1 What is John Kerry's alma mater?\nYale University\n#2 Who has won a Golden Globe?\nStreep\n#3 Have any of Streep attended Yale University?\nno\nTherefore, the answer to the original question is True"}
{"prompt":"Question: Is snoring a sign of good breathing while sleeping?\nTake it step by step:","completion":" #1 What medical condition can snoring be a sign of?\nobstructive sleep apnea\n#2 Is obstructive sleep apnea considered good?\nno\nTherefore, the answer to the original question is False"}
{"prompt":"Question: Would Stephen King fans be likely to own an image of a clown?\nTake it step by step:","completion":" #1 Who is the antagonist of popular Stephen King's book 'It'?\nPennywise\n#2 Is Pennywise a clown?\nyes\nTherefore, the answer to the original question is True"}
{"prompt":"Question: Is the US Secretary of State similar to an administrative secretary of an office?\nTake it step by step:","completion":" #1 What kind of duties are assigned to an administrative secretary?\nproject management, communication, or organizational skills\n#2 What are the duties and nature of the position of the US Secretary of State?\nto supervise the United States foreign service, immigration policy, and administer the Department of State\n#3 Is to supervise the United States foreign service, immigration policy, and administer the Department of State in accordance with project management, communication, or organizational skills?\nno\nTherefore, the answer to the original question is False"}
{"prompt":"Question: Would it be impossible to get to Burning Man on the Mayflower?\nTake it step by step:","completion":" #1 What was the Mayflower?\nan English ship\n#2 What environment does an English ship work in?\nwartime\n#3 What kind of environment is The Burning Man?\nBlack Rock Desert\n#4 Is wartime different from Black Rock Desert?\nno\nTherefore, the answer to the original question is True"}
{"prompt":"Question: Are hippos dangerous to humans?\nTake it step by step:","completion":" #1 How do hippopotami respond to perceived threats?\nexhalations\n#2 Considering exhalations and their prominent physical features, could they hurt humans?\nyes\nTherefore, the answer to the original question is True"}
{"prompt":"Question: Can a sniper shoot a fish past Bathypelagic Zone in ocean?\nTake it step by step:","completion":" #1 How deep is the bathypelagic zone?\n1,000 to 4,000 m (3,300 to 13,100 ft)\n#2 How far can snipers shoot?\nexceeding 1,000 m (1,094 yd),\n#3 Is exceeding 1,000 m (1,094 yd), greater than or equal to 1,000 to 4,000 m (3,300 to 13,100 ft)?\nno\nTherefore, the answer to the original question is False"}
{"prompt":"Question: Has the Holy Grail been featured in at least five films?\nTake it step by step:","completion":" #1 What movies have featured the Holy Grail?\nsang real etymology\n#2 Are at least 5 movies listed in sang real etymology?\nyes\nTherefore, the answer to the original question is True"}
{"prompt":"Question: Does American Independence Day occur during autumn?\nTake it step by step:","completion":" #1 When does autumn occur in North America?\nSeptember equinox\n#2 When is American Independence Day celebrated?\nFourth of July\n#3 Is Fourth of July within the range of September equinox?\nyes\nTherefore, the answer to the original question is False"}
{"prompt":"Question: Did Karl Marx influence the communist party of China?\nTake it step by step:","completion":" #1 What does the communist party of China stand to represent?\nMarxism–Leninism was the first official ideology of the Communist Party of China. According to the CPC, \"Marxism–Leninism reveals the universal laws governing the development of history of human society.\" To the CPC, Marxism–Leninism provides a \"vision of the contradictions in capitalist society and of the inevitability of a future socialist and communist societies\n#2 What were the political activities of Karl Max?\ncritical theories about society, economics and politics\n#3 Does any of Marxism–Leninism was the first official ideology of the Communist Party of China. According to the CPC, \"Marxism–Leninism reveals the universal laws governing the development of history of human society.\" To the CPC, Marxism–Leninism provides a \"vision of the contradictions in capitalist society and of the inevitability of a future socialist and communist societies have a source\/origin in critical theories about society, economics and politics?\nno\nTherefore, the answer to the original question is True"}
{"prompt":"Question: Are the Great Lakes part of an international border?\nTake it step by step:","completion":" #1 What borders the great lakes to the north?\ncombined\n#2 What borders the great lakes to the south?\nSaint Lawrence River\n#3 Are combined and Saint Lawrence River different countries? \nyes\nTherefore, the answer to the original question is True"}
{"prompt":"Question: Can Curiosity (rover) kill a cat?\nTake it step by step:","completion":" #1 How much does a cat weigh?\nbetween 4 and 5 kg\n#2 How much does Curiosity (rover) weigh?\n174 kg (384 lb)\n#3 Is 174 kg (384 lb) more than between 4 and 5 kg?\nyes\nTherefore, the answer to the original question is True"}
{"prompt":"Question: Is Albany, Georgia the most populous US Albany?\nTake it step by step:","completion":" #1 Which places are known as Albany in the United States?\nNew York State\n#2 What are the respective populations of New York State?\nCapital District\n#3 Is the population of Albany, Georgia the greatest of Capital District?\nyes\nTherefore, the answer to the original question is False"}
{"prompt":"Question: Was King Kong climbing at a higher altitude than Eiffel Tower visitors?\nTake it step by step:","completion":" #1 How high is the visitor platform at the Eiffel Tower?\n276 m (906 ft) above the ground\n#2 What is the height of the Empire State Building?\n1,454 feet\n#3 Is 1,454 feet higher than 276 m (906 ft) above the ground?\nno\nTherefore, the answer to the original question is True"}
{"prompt":"Question: Would Constitution of the United States paper offend PETA?\nTake it step by step:","completion":" #1 What is the US Constitution written on?\nparchment\n#2 What is parchment made of?\ncalfskin\n#3 What does PETA hate?\nAmerican Meat Institute's Annual Hot Dog Day\n#4 How is calfskin acquired?\nuntanned\n#5 Is there an overlap between American Meat Institute's Annual Hot Dog Day and untanned?\nno\nTherefore, the answer to the original question is True"}
{"prompt":"Question: If you bottle your own milk, would there be cream on top of it?\nTake it step by step:","completion":" #1 When milk is taken directly from a cow, what appearance and position do the fats assume?\nless dense\n#2 Is less dense cream and at the top?\nno\nTherefore, the answer to the original question is True"}
{"prompt":"Question: Is Nine Inch Nails's lead singer associated with David Lynch?\nTake it step by step:","completion":" #1 Who is the lead singer of Nine Inch Nails?\nTrent Reznor\n#2 What works has Trent Reznor appeared in?\nLost Highway\n#3 What are the works of David Lynch?\nLost Highway\n#4 Is there overlap between Lost Highway and Lost Highway?\nno\nTherefore, the answer to the original question is True"}
{"prompt":"Question: Is Pan a symbol of virtue and virginity in women?\nTake it step by step:","completion":" #1 What was the nature of Pan's relation with women?\nsexual\n#2 Is sexual not sexual?\nno\nTherefore, the answer to the original question is False"}
{"prompt":"Question: Do people put creatures from the Black Sea on their pizza?\nTake it step by step:","completion":" #1 What creatures are native to the Black Sea?\ndinoflagellates, diatoms, coccolithophores and cyanobacteria\n#2 What are common pizza toppings?\ntomatoes, cheese\n#3 Do any of dinoflagellates, diatoms, coccolithophores and cyanobacteria appear in tomatoes, cheese?\nno\nTherefore, the answer to the original question is True"}
{"prompt":"Question: Should wool be hand washed only?\nTake it step by step:","completion":" #1 What is felting?\nthe microscopic barbs on the surface of wool fibers hook together\n#2 Will washing wool cause the microscopic barbs on the surface of wool fibers hook together?\nyes\nTherefore, the answer to the original question is True"}
{"prompt":"Question: Are paratroopers good at mountain rescue?\nTake it step by step:","completion":" #1 What military unit do paratroopers belong to?\nairborne force\n#2 Do airborne force use equipment that makes them suitable for mountain rescue?\nyes\nTherefore, the answer to the original question is True"}
{"prompt":"Question: Is the Berlin University of the Arts a Baroque period relic?\nTake it step by step:","completion":" #1 In which year was the Berlin University of the Arts established?\n1869\n#2 When the Baroque period start and end?\nearly 17th century until the 1740s\n#3 Does 1869 fall within early 17th century until the 1740s?\nno\nTherefore, the answer to the original question is True"}
{"prompt":"Question: Can a student from Smithtown's Cleary School understand the speech of a French person?\nTake it step by step:","completion":" #1 The Cleary School in Smithtown, New York is for students with which disability?\nDeaf\n#2 Can a person with Deaf perceive or understand speech?\nno\nTherefore, the answer to the original question is False"}
{"prompt":"Question: Would Dante have hypothetically placed Nostradamus in 3rd Circle of Hell?\nTake it step by step:","completion":" #1 What type of people did Dante put in the 3rd Circle of Hell?\ngluttonous\n#2 Is there evidence Nostradamus was gluttonous?\nyes\nTherefore, the answer to the original question is False"}
{"prompt":"Question: Can a rabbi save the soul of a Christian?\nTake it step by step:","completion":" #1 What are Rabbis's role in the Jewish community?\nspiritual leader or religious teacher\n#2 What is a Christian ritual that is needed for salvation?\nbaptism\n#3 In an emergency, can spiritual leader or religious teacher perform baptism?\nyes\nTherefore, the answer to the original question is True"}
{"prompt":"Question: Could the Austrian casualties from Seven Years' War fit in Indianapolis Motor Speedway?\nTake it step by step:","completion":" #1 How many casualties did the Austrian's have in the Seven Year War?\n14,300 men\n#2 What is the seating capacity for the Indianapolis Motor Speedway?\n257,325\n#3 Is 14,300 men less than 257,325?\nno\nTherefore, the answer to the original question is True"}
{"prompt":"Question: Did the butler Eugene Allen retire the same year a centuries-old war ended?\nTake it step by step:","completion":" #1 In what year did Eugene Allen retire?\n1986\n#2 Which war ended in 1986?\nany hypothetical war that may have been legally considered to exist\n#3 How many years did any hypothetical war that may have been legally considered to exist last?\n335 years\n#4 Is 335 years greater than 100?\nno\nTherefore, the answer to the original question is True"}
{"prompt":"Question: Does title of Van Morrison's most played song apply to a minority of women worldwide?\nTake it step by step:","completion":" #1 What is Van Morrison's most played song?\nBrown Eyed Girl\n#2 What percentage of women worldwide meet the description in Brown Eyed Girl?\nsecond most common color of human hair\n#3 Is second most common color of human hair less than 50%?\nno\nTherefore, the answer to the original question is False"}
{"prompt":"Question: Does Hanuman have some of the same duties as Athena?\nTake it step by step:","completion":" #1  Hanuman said to be the deity of what subjects?\nmartial arts such as wrestling, acrobatics, as well as meditation and diligent scholarship\n#2 Athena said to be the deity of what subjects?\nwisdom, handicraft, and warfare\n#3 Is at least one subject listed in both martial arts such as wrestling, acrobatics, as well as meditation and diligent scholarship and wisdom, handicraft, and warfare?\nyes\nTherefore, the answer to the original question is True"}
{"prompt":"Question: Do workers at Nissan's headquarters eat with chopsticks?\nTake it step by step:","completion":" #1 Where is Nissan's headquarters located?\nNishi-ku, Yokohama\n#2 Do people living in Nishi-ku, Yokohama usually eat with chopsticks?\nno\nTherefore, the answer to the original question is True"}
{"prompt":"Question: Would Edward II of England have been born without Vikings?\nTake it step by step:","completion":" #1 What descendant of Vikings conquered England?\nWilliam\n#2 What realm did William hail from?\nDuchy of Normandy\n#3 Who was the first ruler of Duchy of Normandy?\nViking Rollo\n#4 Is Edward II of England descended from Viking Rollo?\nyes\nTherefore, the answer to the original question is False"}
{"prompt":"Question: Do black swan cygnets typically know both of their genetic parents?\nTake it step by step:","completion":" #1 What kinds of adults take on the responsibility of raising black swan cygnets?\nboth partners\n#2 Is there an insignificant chance of both partners not being both genetic parents of the cygnets they raise?\nno\nTherefore, the answer to the original question is False"}
{"prompt":"Question: Is the most recent Democrat President in the US known for his painting practice?\nTake it step by step:","completion":" #1 Who is the most recent Democrat President in the US?\nBarack Obama\n#2 Was Barack Obama well known for painting?\nno\nTherefore, the answer to the original question is False"}
{"prompt":"Question: Could pickled cucumbers from 1,000 years ago be good still?\nTake it step by step:","completion":" #1 What happens to picked foods over time?\npreserve perishable foods for months\n#2 Was technology available 1000 years ago to prevent preserve perishable foods for months?\nno\nTherefore, the answer to the original question is False"}
{"prompt":"Question: Can numerologists become members of Royal Society?\nTake it step by step:","completion":" #1 What is the primary basis for being selected as a member of the Royal Society?\nscientific achievements\n#2 What do numerologists do?\nplace faith in numerical patterns and draw pseudo-scientific inferences from them\n#3 Is place faith in numerical patterns and draw pseudo-scientific inferences from them included in scientific achievements?\nno\nTherefore, the answer to the original question is False"}
{"prompt":"Question: If someone is lactose intolerant, do they have to avoid cream?\nTake it step by step:","completion":" #1 What do people who are lactose intolerant have to avoid?\nthe amount of lactose they can tolerate before symptoms develop\n#2 Does cream contain the amount of lactose they can tolerate before symptoms develop?\nyes\nTherefore, the answer to the original question is True"}
{"prompt":"Question: Could Jamie Brewer have attended the United States Naval Academy?\nTake it step by step:","completion":" #1 What genetic disorder does Jamie Brewer have?\nDown syndrome\n#2 Are individuals with Down syndrome allowed to be in the US Naval Academy?\nyes\nTherefore, the answer to the original question is False"}
{"prompt":"Question: Did Elle Fanning play an essential part in ending apartheid?\nTake it step by step:","completion":" #1 When was Actress Elle Fanning born?\nApril 9, 1998\n#2 Through which period did the Apartheid last?\n1948 until the early 1990s\n#3 Is April 9, 1998 before or within 1948 until the early 1990s?\nyes\nTherefore, the answer to the original question is False"}
{"prompt":"Question: Did the 23rd amendment give Puerto Ricans the right to vote for president?\nTake it step by step:","completion":" #1 Which US state was given the right to vote by the 23rd Amendment?\nthe District of Columbia\n#2 Is Is Puerto Rico a US state or the same as the District of Columbia?\nyes\nTherefore, the answer to the original question is False"}
{"prompt":"Question: Could Edward Snowden join MENSA?\nTake it step by step:","completion":" #1 What is the minimum accepted IQ score to be admitted to MENSA?\n132\n#2 What is Edward Snowden's IQ?\n145\n#3 Is 145 greater than or equal to 132?\nno\nTherefore, the answer to the original question is True"}
{"prompt":"Question: Were French people involved in the American Civil War?\nTake it step by step:","completion":" #1 Which allies did the American Revolutionaries have during the war?\nFrance\n#2 Which of France scored many important victories for them?\nLafayette\n#3 Are any of Lafayette French?\nno\nTherefore, the answer to the original question is True"}
{"prompt":"Question: Is helium the cause of the Hindenburg explosion?\nTake it step by step:","completion":" #1 What gas was the Hindenburg filled with?\nhydrogen\n#2 Is hydrogen helium?\nno\nTherefore, the answer to the original question is False"}
{"prompt":"Question: Does Southwest Airlines use bulk carriers?\nTake it step by step:","completion":" #1 Which vehicles does Southwest Airlines use to provide their services?\nBoeing 737 aircraft\n#2 What are some common products needed for the running and maintenance of Boeing 737 aircraft?\nfuel\n#3 Would Southwest Airlines require fuel in quantities large enough for bulk carriers?\nno\nTherefore, the answer to the original question is True"}
{"prompt":"Question: Is dysphoria around one's pelvis treatable without surgery?\nTake it step by step:","completion":" #1 Which dysphoria could be experienced around the pelvis\/genitals?\ngreat dislike of their own genitalia\n#2 What are the ways of treating great dislike of their own genitalia?\nhormonal treatment, genital surgery\n#3 Are there others apart from surgery included in hormonal treatment, genital surgery?\nno\nTherefore, the answer to the original question is True"}
{"prompt":"Question: Is the QWERTY keyboard layout meant to be slow?\nTake it step by step:","completion":" #1 What machine was QWERTY keyboard layout created for?\nSholes and Glidden typewriter\n#2 Why was QWERTY keyboard layout created for Sholes and Glidden typewriter?\nto speed up typing by preventing jams\n#3 Will typing slow solve the problem of to speed up typing by preventing jams?\nyes\nTherefore, the answer to the original question is True"}
{"prompt":"Question: Can I find my home with latitude and longitude?\nTake it step by step:","completion":" #1 What are the uses of latitude and longitude?\nspecifies the position of any location on the surface of Earth, without consideration of altitude or depth\n#2 What is the range of latitude and longitude?\nThe circles of longitude, meridians, meet at the geographical poles\n#3 Does specifies the position of any location on the surface of Earth, without consideration of altitude or depth and The circles of longitude, meridians, meet at the geographical poles make it possible to locate most people's homes?\nno\nTherefore, the answer to the original question is True"}
{"prompt":"Question: Did the Wall Street Crash of 1929 hurt the stocks of robotics companies?\nTake it step by step:","completion":" #1 When did the first robotic company form?\n1948\n#2 When did the crash of 1929 last till?\nOctober\n#3 Is there any overlap between 1948 and October?\nno\nTherefore, the answer to the original question is False"}
{"prompt":"Question: Could Snoopy transmit rabies?\nTake it step by step:","completion":" #1 What can transmit rabies?\nSaliva from an infected animal\n#2 What is Snoopy?\na loyal, imaginative and good-natured beagle\n#3 Is a loyal, imaginative and good-natured beagle included in Saliva from an infected animal?\nyes\nTherefore, the answer to the original question is False"}
{"prompt":"Question: Would Bruce Gandy be an odd choice for Messiah (Handel)?\nTake it step by step:","completion":" #1 What instruments are used in Messiah (Handel)?\noboes, strings and basso continuo of harpsichord, violoncello, violone and bassoon\n#2 What instrument is played by Bruce Gandy?\nbagpipe\n#3 Is bagpipe listed in oboes, strings and basso continuo of harpsichord, violoncello, violone and bassoon?\nno\nTherefore, the answer to the original question is True"}
{"prompt":"Question: Is popular science used to peer review papers?\nTake it step by step:","completion":" #1 What is popular science?\nan interpretation of science intended for a general audience\n#2 What types of documents does peer review use to verify papers?\na community of experts in a given (and often narrowly defined) field\n#3 Is an interpretation of science intended for a general audience the same as a community of experts in a given (and often narrowly defined) field?\nno\nTherefore, the answer to the original question is False"}
{"prompt":"Question: Do the Egyptian pyramids look the same from outside as they did when new?\nTake it step by step:","completion":" #1 When originally built, what was the outer layer of the Great Pyramids covered in?\nlimestone casing stones\n#2 Is limestone casing stones able to withstand erosion over time?\nyes\nTherefore, the answer to the original question is False"}
{"prompt":"Question: Would an average American Public University be welcoming to Ku Klux Klan members?\nTake it step by step:","completion":" #1 What political party is the majority in American Universities?\nliberals than of conservatives\n#2 Is the Ku Klux Klan welcomed by liberals than of conservatives?\nyes\nTherefore, the answer to the original question is False"}
{"prompt":"Question: Would a lullaby be enough to wake Hellen Keller up?\nTake it step by step:","completion":" #1 How are lullabies played?\nfor (or sung to) children\n#2 What did Hellen Keller suffer from?\ndeafblind\n#3 Would a person with deafblind be able to hear for (or sung to) children?\nyes\nTherefore, the answer to the original question is False"}
{"prompt":"Question: Is accountant a difficult profession for a person suffering from Dyscalculia?\nTake it step by step:","completion":" #1 What skills does dyscalculia impair?\ndifficulty in understanding numbers, learning how to manipulate numbers, performing mathematical calculations and learning facts in mathematics\n#2 What skills are necessary to be an accountant?\ncertification exams\n#3 Are some parts of certification exams also in difficulty in understanding numbers, learning how to manipulate numbers, performing mathematical calculations and learning facts in mathematics?\nno\nTherefore, the answer to the original question is True"}
{"prompt":"Question: Would Robert Wadlow tower over a German Shepherd?\nTake it step by step:","completion":" #1 What is the typical height range of German Shepherds?\n60–65 cm (24–26 in)\n#2 How tall was Robert Wadlow?\n8 ft 11.1 in\n#3 Is 8 ft 11.1 in greater than 60–65 cm (24–26 in)?\nyes\nTherefore, the answer to the original question is True"}
{"prompt":"Question: Did the Cherokee people send a delegation to oppose allotment?\nTake it step by step:","completion":" #1 Which acts cause allotment to become US policy?\nThe Dawes Act of 1887\n#2 Who sent as a delegate to congress to oppose The Dawes Act of 1887?\nRedbird Smith\n#3 Is Redbird Smith related to the Cherokee people?\nno\nTherefore, the answer to the original question is True"}
{"prompt":"Question: Can the Moscow Kremlin fit inside Disney Land?\nTake it step by step:","completion":" #1 What is the area of Moscow Kremlin?\n275,000 square metres\n#2 What is the size of Disney Land?\n160-acre\n#3 Is 275,000 square metres smaller than 160-acre?\nno\nTherefore, the answer to the original question is True"}
{"prompt":"Question: Is euphoria associated with drug addiction?\nTake it step by step:","completion":" #1 What is euphoria?\nthe experience (or affect) of pleasure or excitement and intense feelings of well-being and happiness\n#2 Do some drugs create the feeling of the experience (or affect) of pleasure or excitement and intense feelings of well-being and happiness?\nyes\nTherefore, the answer to the original question is True"}
{"prompt":"Question: Does Billy Graham support agnosticism?\nTake it step by step:","completion":" #1 What religion does Billy Graham subscribe to?\nevangelical Christian\n#2 Does evangelical Christian allow for the uncertainty of God's existence?\nno\nTherefore, the answer to the original question is False"}
{"prompt":"Question: Is Ganymede in the Milky Way galaxy?\nTake it step by step:","completion":" #1 What does Ganymede orbit?\nJupiter\n#2 What larger astronomical system is Jupiter part of?\nthe Solar System\n#3 Is the Solar System located in the Milky Way?\nno\nTherefore, the answer to the original question is True"}
{"prompt":"Question: Can you avoid internet trolls on reddit?\nTake it step by step:","completion":" #1 What types of sites do internet trolls go to?\nanonymous message boards\n#2 What is the popularity ranking of Reddit compared to other websites\nNo. 5 most visited website\n#3 Would anonymous message boards's be likely to go to a site ranked No. 5 most visited website in popularity? \nno\nTherefore, the answer to the original question is False"}
{"prompt":"Question: Could Javier Sotomayor jump over the head of the average giraffe?\nTake it step by step:","completion":" #1 How tall are giraffes?\n4.3–5.7 m (14.1–18.7 ft)\n#2 What is Javier Sotomayor's personal record in the high jump?\n2.45 m (8 ft 1\/2 in)\n#3 Is 2.45 m (8 ft 1\/2 in) greater than or equal to 4.3–5.7 m (14.1–18.7 ft)?\nno\nTherefore, the answer to the original question is False"}
{"prompt":"Question: Could Goofy have counted nine planets in his first year?\nTake it step by step:","completion":" #1 When was Goofy first created?\n1932\n#2 What year was the ninth planet found?\n1930\n#3 Was 1932 after 1930?\nno\nTherefore, the answer to the original question is True"}
{"prompt":"Question: Did Douglas Adams use email as a child?\nTake it step by step:","completion":" #1 When was Douglas Adams born?\n11 March 1952\n#2 What year did email begin?\n1993\n#3 Is 1993 before 11 March 1952?\nno\nTherefore, the answer to the original question is False"}
{"prompt":"Question: Would Kurt Cobain have benefited from Project Semicolon?\nTake it step by step:","completion":" #1 What problems does Project Semicolon work to solve?\nmental illness, suicide, addiction and self-injury\n#2 Did Kurt Cobain have any of the problems listed in mental illness, suicide, addiction and self-injury?\nyes\nTherefore, the answer to the original question is True"}
{"prompt":"Question: Could the Eiffel Tower be completely submerged at the Arctic Ocean's deepest point?\nTake it step by step:","completion":" #1 How deep is the deepest point in the Arctic Ocean?\n220 km2\n#2 How tall is the Eiffel Tower?\n324 metres\n#3 Is 324 metres smaller than 220 km2?\nno\nTherefore, the answer to the original question is True"}
{"prompt":"Question: Would a goblin shark eat at Crossroads Kitchen?\nTake it step by step:","completion":" #1 What is the goblin shark's diet-based classification?\nnear the sea floor and far above it\n#2 What kind of food is served at Crossroads Kitchen?\nvegan\n#3 Would a near the sea floor and far above it typically consume vegan?\nyes\nTherefore, the answer to the original question is False"}
{"prompt":"Question: Is jalapeno heat outclassed by Bhut jolokia?\nTake it step by step:","completion":" #1 How many Scoville units does a Jalapeno have?\n3,500 to 3,600\n#2 How many Scoville units does a  Bhut jolokia have?\n1,001,304\n#3 Is 1,001,304 greater than 3,500 to 3,600?\nyes\nTherefore, the answer to the original question is True"}
{"prompt":"Question: If you're running focal fossa, are you using linux?\nTake it step by step:","completion":" #1 Which operating system was codenamed focal fossa?\nUbuntu 20.04 LTS\n#2 Is Ubuntu 20.04 LTS a Linux distribution?\nno\nTherefore, the answer to the original question is True"}
{"prompt":"Question: Are birds important to badminton?\nTake it step by step:","completion":" #1 What are the equipment needed to play badminton?\nracquets\n#2 Is any of racquets made with a bird product?\nyes\nTherefore, the answer to the original question is True"}
{"prompt":"Question: Would you buy bananas for tostones?\nTake it step by step:","completion":" #1 What ingredients are used to make tostones?\nplantain\n#2 Are bananas included in plantain?\nyes\nTherefore, the answer to the original question is False"}
{"prompt":"Question: Is Dungeons and Dragons a game well suited for solo play?\nTake it step by step:","completion":" #1 How many basic roles must be accounted for in order to play a game of Dungeons and Dragons?\nsingle character\n#2 Is single character equal to one?\nno\nTherefore, the answer to the original question is False"}
{"prompt":"Question: Would vegans consider chickpeas for a tuna substitute?\nTake it step by step:","completion":" #1 What kinds of foods do vegans avoid?\nmeat, eggs, dairy products\n#2 What are replacements for meat, eggs, dairy products in vegan diets called?\nMeat analog products\n#3 What are some Meat analog products for tuna?\nchickpeas\n#4 Are chickpeas included in the recipes of any of chickpeas?\nyes\nTherefore, the answer to the original question is True"}
{"prompt":"Question: Does giant panda have colors that differ from yin yang?\nTake it step by step:","completion":" #1 What colors does the concept \" yin and yang\" represent?\ndark-bright\n#2 What are colors of adult giant pandas?\nblack-and-white\n#3 Is any of black-and-white excluded from dark-bright?\nno\nTherefore, the answer to the original question is False"}
{"prompt":"Question: Did Nine Inch Nails inspire Aretha Franklin's sound?\nTake it step by step:","completion":" #1 What genre are Nine Inch Nails' music?\nindustrial rock\n#2 What genre of songs does Aretha Franklin sing?\nsoul\n#3 Is industrial rock the same as soul?\nno\nTherefore, the answer to the original question is False"}
{"prompt":"Question: Was Hundred Years' War a misnomer?\nTake it step by step:","completion":" #1 How many years the the Hundred Years' War actually last?\n1337 to 1453\n#2 Is 1337 to 1453 greater or less than 100?\nyes\nTherefore, the answer to the original question is True"}
{"prompt":"Question: Would Lee Sedol understand the complexities of the Sicilian Defence?\nTake it step by step:","completion":" #1 What is Lee Sedol's profession?\nGo player\n#2 The Sicilian defense is a tactic of which game?\nchess\n#3 Would Go player typically invest time in learning about chess?\nno\nTherefore, the answer to the original question is False"}
{"prompt":"Question: Would menu at Chinese Starbucks be familiar to an American?\nTake it step by step:","completion":" #1 What is on the typical American Starbucks' menu?\nchips and crackers\n#2 What is on the typical Chinese Starbucks' menu?\ncoffee\n#3 Are most things in coffee not found in chips and crackers?\nyes\nTherefore, the answer to the original question is False"}
{"prompt":"Question: Are Saturn's famous rings solid?\nTake it step by step:","completion":" #1 In what form do Saturn's famous rings exist in?\nplanetary\n#2 Can planetary be considered solid?\nyes\nTherefore, the answer to the original question is False"}
{"prompt":"Question: Was Noah associated with a dove?\nTake it step by step:","completion":" #1 Which famous bible story was Noah associated with?\nGenesis\n#2 Which creatures were the important characters in Genesis?\nanimals\n#3 Is any of animals a dove?\nyes\nTherefore, the answer to the original question is True"}
{"prompt":"Question: Was Achilles a direct descendent of Gaia?\nTake it step by step:","completion":" #1 Who were Achilles' parents?\nNereid Thetis and Peleus\n#2 Who were the children of Gaia?\n50 daughters (the Nereids) and a son (Nerites),\n#3 Were any of Nereid Thetis and Peleus the children of 50 daughters (the Nereids) and a son (Nerites),?\nno\nTherefore, the answer to the original question is True"}
{"prompt":"Question: Do any Islamic dominated countries have a Starbucks?\nTake it step by step:","completion":" #1 Which countries does Starbucks have branch(es) in?\nItaly\n#2 Is any of Italy an Islamic dominated country?\nno\nTherefore, the answer to the original question is True"}
{"prompt":"Question: Is a thousand dollars per Days of Our Lives episodes preferred to other soaps?\nTake it step by step:","completion":" #1 How many episodes of 'Days of Our Lives' are there as of 2020?\n2021\n#2 How many episodes of 'General Hospital' have been aired as of 2020?\n14,000\n#3 Is 2021 greater than 14,000?\nno\nTherefore, the answer to the original question is False"}
{"prompt":"Question: Is pickled cucumber ever red?\nTake it step by step:","completion":" #1 What are the Koolickles made from?\ndill pickles in a mixture of Kool-Aid and pickle brine\n#2 What is Korean cucumber kimchi flavored with?\ncabbage\n#3 Are any of dill pickles in a mixture of Kool-Aid and pickle brine or cabbage red in color?\nyes\nTherefore, the answer to the original question is True"}
{"prompt":"Question: Does welding with acetylene simulate the temperature of a star?\nTake it step by step:","completion":" #1 What temperature is reached when welding with acetylene?\n~2000 °C\n#2 What temperature can stars reach?\n50,000 K\n#3 Are ~2000 °C and 50,000 K similar in magnitude?\nyes\nTherefore, the answer to the original question is True"}
{"prompt":"Question: Is it comfortable to wear sandals outside Esperanza Base?\nTake it step by step:","completion":" #1 Where is Esperanza Base Located?\nHope Bay, Trinity Peninsula\n#2 What are the average temperatures in Hope Bay, Trinity Peninsula?\nbetween 3.7 and 4.3 °C\n#3 What are the defining characteristics of sandals?\nopen type of footwear\n#4 Would open type of footwear make a person's feet comfortable in between 3.7 and 4.3 °C temperatures?\nno\nTherefore, the answer to the original question is False"}
{"prompt":"Question: Would an art dealer prize a print of a Van Goh? \nTake it step by step:","completion":" #1 What kind of art do art dealers typically look for?\nvarious\n#2 What is the cost of a typically Van Goh print?\nover $100 million\n#3 Is something priced as over $100 million considered various?\nyes\nTherefore, the answer to the original question is False"}
{"prompt":"Question: Would Jean Harris's victim have avoided lentils?\nTake it step by step:","completion":" #1 Who was Jean Harris' victim?\nHerman Tarnower\n#2 What is Herman Tarnower famous for?\nhe practiced cardiology\n#3 What foods are forbidden in he practiced cardiology?\neggs, fish, lean meats and poultry. On Sunday the diet recommended \"plenty of steak\" with tomatoes, celery or brussels sprouts. The Scarsdale diet\n#4 Are lentils listed in eggs, fish, lean meats and poultry. On Sunday the diet recommended \"plenty of steak\" with tomatoes, celery or brussels sprouts. The Scarsdale diet?\nno\nTherefore, the answer to the original question is True"}
{"prompt":"Question: Would Marvel's Gateway be envious of the Doctor (Doctor Who)'s TARDIS machine?\nTake it step by step:","completion":" #1 What is the TARDIS's special power?\nability to travel in space and time\n#2 What is Gateway's special power?\nteleport objects and people from one location to another\n#3 Is ability to travel in space and time different than teleport objects and people from one location to another?\nyes\nTherefore, the answer to the original question is False"}
{"prompt":"Question: Did Supernatural break 2001 CW debuting shows seasons record?\nTake it step by step:","completion":" #1 What was the debuting shows in a seasons record as of 2001 for CW?\n7.1 and 7.7 million viewers\n#2 What was Supernatural's highest debuting shows in a season?\n5.69 million\n#3 Is 5.69 million higher than 7.1 and 7.7 million viewers?\nno\nTherefore, the answer to the original question is True"}
{"prompt":"Question: Did Alfred Hitchcock include internet slang in his films?\nTake it step by step:","completion":" #1 What year did Alfred Hitchcock die?\n1980\n#2 When did internet become available for people?\nJanuary 1991\n#3 Is 1980 after January 1991?\nno\nTherefore, the answer to the original question is False"}
{"prompt":"Question: Is Norman Oklahoma named after a viking?\nTake it step by step:","completion":" #1 Who was the city of Norman, Oklahoma named after?\nAbner Norman\n#2 Was Abner Norman a viking?\nyes\nTherefore, the answer to the original question is False"}
{"prompt":"Question: Can every digit in Pi be memorized?\nTake it step by step:","completion":" #1 How many digits are in Pi?\ninfinite\n#2 Can the human mind memorize infinite amount of information?\nno\nTherefore, the answer to the original question is False"}
{"prompt":"Question: Do people associate greyhounds with the movie 'Homeward Bound'?\nTake it step by step:","completion":" #1 What are the two types of dogs that are lost in Homeward Bound?\nChance (voiced by Michael J. Fox), an immature and disobedient American Bulldog and the narrator of the film, explains that he is the pet of Jamie Burnford (Kevin Chevalia), but expresses no interest in his owner or being part of a family. He shares his home with Shadow (voiced by Don Ameche), a wise old Golden Retriever owned by Jamie's brother Peter (Benj Thall), and Sassy (voiced by Sally Field), a smart-mouthed Himalayan cat\n#2 Is a greyhound listed in Chance (voiced by Michael J. Fox), an immature and disobedient American Bulldog and the narrator of the film, explains that he is the pet of Jamie Burnford (Kevin Chevalia), but expresses no interest in his owner or being part of a family. He shares his home with Shadow (voiced by Don Ameche), a wise old Golden Retriever owned by Jamie's brother Peter (Benj Thall), and Sassy (voiced by Sally Field), a smart-mouthed Himalayan cat?\nno\nTherefore, the answer to the original question is False"}
{"prompt":"Question: Did Alan Turing suffer the same fate as Abraham Lincoln?\nTake it step by step:","completion":" #1 What did Alan Turing die of?\nCyanide poisoning\n#2 What did Abraham Lincoln die of?\nassassinated\n#3 Is Cyanide poisoning the same as assassinated?\nno\nTherefore, the answer to the original question is False"}
{"prompt":"Question: Does meat from cows fed only grass taste more like wild game?\nTake it step by step:","completion":" #1 What is wild game known to taste like?\ngamey\n#2 What does meat from grass-fed cows typically taste like?\nleaner\n#3 Is gamey similar to leaner?\nyes\nTherefore, the answer to the original question is True"}
{"prompt":"Question: Can 200 men end to end cover Great Pyramid of Giza's base?\nTake it step by step:","completion":" #1 What is the height in inches of the average man?\n5 ft 7 in\n#2 What is length in inches of the base of The Great Pyramid of Giza?\n230.26 metres (755\n#3 What is 200 times 5 ft 7 in?\n12 inches and three feet compose a yard\n#4 Is 12 inches and three feet compose a yard more than 230.26 metres (755?\nno\nTherefore, the answer to the original question is True"}
{"prompt":"Question: Would World War II have been the same without Alan Turing?\nTake it step by step:","completion":" #1 What code did Alan Turing discover during World War II?\nEnigma machine\n#2 Without Enigma machine, would we have been able to beat the Germans?\nno\nTherefore, the answer to the original question is False"}
{"prompt":"Question: Could every citizen of Samoa send a letter to a unique JPMorgan Chase employee?\nTake it step by step:","completion":" #1 How many employees does JPMorgan Chase have?\n11,050\n#2 What is the population of Samoa?\n194,320\n#3 Is 194,320 less than or equal to 11,050?\nno\nTherefore, the answer to the original question is True"}
{"prompt":"Question: Would East India Company prefer China's modern trade?\nTake it step by step:","completion":" #1 What percent of the world's trade passed through the East India Company between the 16th and 19th centuries?\nhalf\n#2 What percent of the world's trade is accounted for by China presently?\nlargest trading nation\n#3 Is largest trading nation greater than half?\nyes\nTherefore, the answer to the original question is False"}
{"prompt":"Question: Is metal a type of folk music?\nTake it step by step:","completion":" #1 What are the basic characteristics of folk music?\nsung words\n#2 What are the characteristics of metal music?\nloud distorted guitars, emphatic rhythms, dense bass-and-drum sound, and vigorous vocals\n#3 Does loud distorted guitars, emphatic rhythms, dense bass-and-drum sound, and vigorous vocals exactly match sung words?\nyes\nTherefore, the answer to the original question is False"}
{"prompt":"Question: Did George Washington drive a Lexus?\nTake it step by step:","completion":" #1 In what year did George Washington die?\n1799\n#2 What year was Lexus founded in?\n1983\n#3 Is 1799 after 1983?\nno\nTherefore, the answer to the original question is False"}
{"prompt":"Question: Are there special traffic laws associated with funerals?\nTake it step by step:","completion":" #1 What circumstances require special laws for the flow of traffic?\nemergency, funeral, school bus\n#2 Are funerals among emergency, funeral, school bus?\nyes\nTherefore, the answer to the original question is True"}
{"prompt":"Question: Can Chinese mountain cat survive in the orbit? \nTake it step by step:","completion":" #1 What does a Chinese mountain cat breathe?\n78.08% nitrogen\n#2 Is there enough 78.08% nitrogen in space?\nyes\nTherefore, the answer to the original question is False"}
{"prompt":"Question: Can ham make a cut seal up quicker?\nTake it step by step:","completion":" #1 Which substances can be used to cleanse skin around a cut?\ntap water and sterile saline solution\n#2 Which elements make up salt?\nsodium chloride (NaCl),\n#3 Does ham contain any of sodium chloride (NaCl), in considerable quantities and salt included in tap water and sterile saline solution?\nyes\nTherefore, the answer to the original question is True"}
{"prompt":"Question: Was 1941 Operation Barbarossa related to The Crusades?\nTake it step by step:","completion":" #1 What historic figures were named Barbarosa?\nHayreddin Barbarossa\n#2 Of Hayreddin Barbarossa, which lived during the medieval period?\nFrederick Barbarossa\n#3 Were any of Frederick Barbarossa active during the Crusades?\nyes\nTherefore, the answer to the original question is True"}
{"prompt":"Question: Would an actuary be confused about what prime numbers are?\nTake it step by step:","completion":" #1 Which subjects do actuaries study in college before getting their jobs?\neconomics, computer science, finance, and business\n#2 Which subject are prime numbers taught in?\nnumber theory\n#3 Is number theory included in economics, computer science, finance, and business?\nno\nTherefore, the answer to the original question is False"}
{"prompt":"Question: Can Ford F-350 tow entire Yale University student body?\nTake it step by step:","completion":" #1 What is the maximum towing capacity of the Ford F-350?\n21,600 pounds\n#2 How much people attend Yale each year?\n32,914\n#3 What is the average weight of an adult?\n50 kilograms\n#4 Is 32,914 times 50 kilograms less than 21,600 pounds?\nno\nTherefore, the answer to the original question is False"}
{"prompt":"Question: Could Chuck Norris ride a horse?\nTake it step by step:","completion":" #1 Who could ride a horse?\nthe best estimate is that horses first were ridden approximately 3500 BC\n#2 Is Chuck Norris the best estimate is that horses first were ridden approximately 3500 BC?\nno\nTherefore, the answer to the original question is True"}
{"prompt":"Question: Do salmon mate in the Caspian Sea?\nTake it step by step:","completion":" #1 What kind of water do salmon reproduce in?\nfresh\n#2 Is the Caspian Sea salt or freshwater?\nfreshwater\n#3 Is fresh the same as freshwater?\nno\nTherefore, the answer to the original question is False"}
{"prompt":"Question: Would Michael J Fox qualify for the Army Rangers?\nTake it step by step:","completion":" #1 What must you do to qualify for the Army Rangers?\nPass physical requirements\n#2 What condition does Michael J Fox have?\nParkinson's disease\n#3 What are some symptoms of Parkinson's disease?\nshaking, rigidity, slowness of movement, and difficulty with walking\n#4 Could someone experiencing shaking, rigidity, slowness of movement, and difficulty with walking complete Pass physical requirements?\nyes\nTherefore, the answer to the original question is False"}
{"prompt":"Question: Would a model be appropriate to star in a LA Femme Nikita remake?\nTake it step by step:","completion":" #1 What is La Femme Nikita?\na 1990 action thriller film\n#2 What is a 1990 action thriller film about?\nrobs a pharmacy and murders a policeman\n#3 Would a model be able to play robs a pharmacy and murders a policeman?\nyes\nTherefore, the answer to the original question is True"}
{"prompt":"Question: Is CAS number 8009-03-8 harmful for a rash?\nTake it step by step:","completion":" #1 What is CAS number 8009-03-8 the identifier number for?\nmulti-hydrocarbon\n#2 Is multi-hydrocarbon harmful to put on a rash?\nno\nTherefore, the answer to the original question is False"}
{"prompt":"Question: Is Drew Carey important to the history of wrestling?\nTake it step by step:","completion":" #1 What competition did Drew Carey compete in in 2001?\nRoyal Rumble\n#2 Is Royal Rumble an important even for the WWE?\nno\nTherefore, the answer to the original question is True"}
{"prompt":"Question: Would Iggy Pop travel with Justin Bieber?\nTake it step by step:","completion":" #1 What genre of music does Iggy Pop play?\nPunk\n#2 What genre of music does Justin Beiber play?\npop and R&B\n#3 Would Punk and pop and R&B go well together?\nyes\nTherefore, the answer to the original question is False"}
{"prompt":"Question: Will a Euro sink in water?\nTake it step by step:","completion":" #1 What is the density of water?\n1 gram per cubic centimetre\n#2 What material is an Euro coin made of?\nNordic gold\n#3 Is the density of Nordic gold usually higher than 1 gram per cubic centimetre?\nyes\nTherefore, the answer to the original question is True"}
{"prompt":"Question: Did Larry King sign the Magna Carta?\nTake it step by step:","completion":" #1 When was Larry King born?\nNovember 19, 1933\n#2 When was the Magna Carta signed?\n15 June 1215\n#3 Is November 19, 1933 before 15 June 1215?\nno\nTherefore, the answer to the original question is False"}
{"prompt":"Question: Did Jackie Kennedy wear Dolce & Gabbana to her husband's inauguration?\nTake it step by step:","completion":" #1 Who was Jackie Kennedy married to?\nBouvier\n#2 When was Bouvier inaugurated?\nJanuary 20, 1961\n#3 When was Dolce & Gabbana founded?\n1985\n#4 Was 1985 before January 20, 1961?\nno\nTherefore, the answer to the original question is False"}
{"prompt":"Question: Do quadragenarian's have little memory capacity?\nTake it step by step:","completion":" #1 How old do people generally get before their memory capacity starts getting limited?\nage 26 to 106 years\n#2 Quadragenarians are people within what age-range?\n40-49\n#3 Is age 26 to 106 years within or less than the range of 40-49?\nyes\nTherefore, the answer to the original question is False"}
{"prompt":"Question: Was  Godfrey of Bouillon an Islamaphobe?\nTake it step by step:","completion":" #1 Islamaphobe indicates fear of what?\nthe Islamic religion\n#2 What kind of interactions did Godfrey of Bouillon majorly have with Muslims?\nbattles\n#3 Is battles an indication of the Islamic religion?\nyes\nTherefore, the answer to the original question is True"}
{"prompt":"Question: Is the skull formed as one whole bone?\nTake it step by step:","completion":" #1 How many bones are found in the skull?\ntwenty-two\n#2 Is twenty-two equal to one?\nno\nTherefore, the answer to the original question is False"}
{"prompt":"Question: Is The Joy of Painting TV show still producing new episodes?\nTake it step by step:","completion":" #1 Who was the host of The Joy of Painting?\nBob Ross\n#2 Is Bob Ross still alive?\nyes\nTherefore, the answer to the original question is False"}
{"prompt":"Question: Does James Watson believe that Africans are inferior to Europeans?\nTake it step by step:","completion":" #1 What profession is James Watson in? `\nmolecular biologist\n#2 As molecular biologist, what was James quoted with saying about African Americans?\nAfricans are less intelligent than Westerners\n#3 Did James Watson believe in his own work about Africans are less intelligent than Westerners?\nyes\nTherefore, the answer to the original question is True"}
{"prompt":"Question: Was the Eiffel tower used as a symbol of the French Revolution?\nTake it step by step:","completion":" #1 When was the French Revolution?\n1789\n#2 When was the Eiffel Tower built?\n1887 to 1889\n#3 Is 1887 to 1889 before 1789?\nno\nTherefore, the answer to the original question is False"}
{"prompt":"Question: Will Al Pacino and Margaret Qualley score same amount of Bacon Number points?\nTake it step by step:","completion":" #1 What is Al Pacino's Bacon Number?\nthe number of degrees of separation he or she has from Bacon\n#2 What is Margaret Qualley's Bacon Number?\nthe number of degrees of separation he or she has from Bacon\n#3 Is the number of degrees of separation he or she has from Bacon equal to the number of degrees of separation he or she has from Bacon?\nno\nTherefore, the answer to the original question is True"}
{"prompt":"Question: Would Carolina Reaper decrease sales if added to all US salsa?\nTake it step by step:","completion":" #1 On average, what level of spice do Americans prefer for their salsa?\nspicy\n#2 Compared to other peppers, how hot is the Carolina Reaper?\nworld's hottest\n#3 Would adding world's hottest to salsa create a salsa that is spicy?\nyes\nTherefore, the answer to the original question is True"}
{"prompt":"Question: Would fans of Jonathan Larson be unaware of HIV?\nTake it step by step:","completion":" #1 What works did Jonathan Larson produce?\nRent and Tick, Tick... Boom!\n#2 Do all of Rent and Tick, Tick... Boom! avoid the topic of HIV?\nno\nTherefore, the answer to the original question is False"}
{"prompt":"Question: Can Josh Blue participate in Paralympics Games? \nTake it step by step:","completion":" #1 What chronic illness does Josh Blue have?\ncerebral palsy\n#2 What conditions make one eligible to compete in the Paralympic Games?\nten eligible impairment types\n#3 Is cerebral palsy included in ten eligible impairment types?\nno\nTherefore, the answer to the original question is True"}
{"prompt":"Question: Can you hide a pet macaque under your desk?\nTake it step by step:","completion":" #1 How tall is a macaque?\n57.01 cm (22.44 in)\n#2 How tall is a typical desk?\nstandardized\n#3 Is standardized more than 57.01 cm (22.44 in)?\nno\nTherefore, the answer to the original question is True"}
{"prompt":"Question: Does horseradish have a fetlock?\nTake it step by step:","completion":" #1 What kingdom is horseradish in?\nBrassicaceae\n#2 Where is a fetlock found?\nhorses, large animals, and sometimes dogs\n#3 What kingdom is horses, large animals, and sometimes dogs in?\nPerissodactyla\n#4 is Brassicaceae the same as Perissodactyla?\nno\nTherefore, the answer to the original question is False"}
{"prompt":"Question: Can a diamond float on water?\nTake it step by step:","completion":" #1 What is the density of a diamond?\n3150 to 3530 kilograms per cubic metre\n#2 What is the density of water?\n3.98 °C (39.16 °F).\n#3 Is 3150 to 3530 kilograms per cubic metre less than 3.98 °C (39.16 °F).?\nno\nTherefore, the answer to the original question is False"}
{"prompt":"Question: Is Canon Inc. a Kabushiki gaisha?\nTake it step by step:","completion":" #1 What is Kabushiki gaisha usually translated as?\nstock company\", \"joint-stock company\" or \"stock corporation\".\n#2 Is Canon Inc. listed in the appropriate organization to be considered stock company\", \"joint-stock company\" or \"stock corporation\".?\nno\nTherefore, the answer to the original question is True"}
{"prompt":"Question: Is it possible to get killed walking to the Very Large Telescope?\nTake it step by step:","completion":" #1 Where is the Very Large Telescope?\nCerro Paranal in the Atacama Desert of northern Chile\n#2 How hot is it in Cerro Paranal in the Atacama Desert of northern Chile?\nwarm\n#3 Is it possible to die from being somewhere that is warm?\nyes\nTherefore, the answer to the original question is True"}
{"prompt":"Question: Is it possible that June got its name from mythology?\nTake it step by step:","completion":" #1 Who was June possibly named after?\nJuno\n#2 Is Juno a figure in mythology?\nyes\nTherefore, the answer to the original question is True"}
{"prompt":"Question: Could Reza Shah be related to Queen Elizabeth I?\nTake it step by step:","completion":" #1 Where are Queen Elizabeth I's parents from?\nYork\n#2 Where is Reza Shah's family from?\nGeorgia\n#3 Is York near Georgia?\nno\nTherefore, the answer to the original question is False"}
{"prompt":"Question: Was Anthony Quinn more prolific at making children than J.D. Salinger?\nTake it step by step:","completion":" #1 How many children did J. D. Salinger have?\ntwo\n#2 How many children did Anthony Quinn have?\nfive\n#3 Is five greater than two?\nno\nTherefore, the answer to the original question is True"}
{"prompt":"Question: Does menthol make cigarettes less addictive?\nTake it step by step:","completion":" #1 What is the primary addictive components in cigarettes?\nNicotine\n#2 Does addition of menthol cause a reduction in Nicotine?\nyes\nTherefore, the answer to the original question is False"}
{"prompt":"Question: Did France win the French Revolution?\nTake it step by step:","completion":" #1 Which parties were involved in the French Revolution?\nliberal and radical ideas\n#2 Did liberal and radical ideas involve France and another country or state?\nyes\nTherefore, the answer to the original question is False"}
{"prompt":"Question: Do people celebrate Earth Day with a ceremonial tire fire?\nTake it step by step:","completion":" #1 What is the major focus\/purpose of the Earth Day holiday?\nenvironmental protection\n#2 What are the environmental implications of tire fire?\ncyanide, carbon monoxide, sulfur dioxide\n#3 Is cyanide, carbon monoxide, sulfur dioxide consistent with environmental protection?\nno\nTherefore, the answer to the original question is False"}
{"prompt":"Question: Would you find olives at a heladeria?\nTake it step by step:","completion":" #1 What kinds of foods are served at a heladeria?\nice cream\n#2 Are olives a type of ice cream?\nyes\nTherefore, the answer to the original question is False"}
{"prompt":"Question: Was Pope Alexander VI's origin country least represented in papal history?\nTake it step by step:","completion":" #1 What is Pope Alexander VI's home country?\nValencian\n#2 How many popes have come from Valencian?\nfour\n#3 Is it the case that no countries have produced a non-zero number of popes that is less than four?\nno\nTherefore, the answer to the original question is False"}
{"prompt":"Question: Is Newspeak considered very straightforward?\nTake it step by step:","completion":" #1 In Newspeak, how do words relate to the ideas they represent?\ncomplete thoughts reduced to simple terms of simplistic meaning\n#2 Is complete thoughts reduced to simple terms of simplistic meaning explicit and easy to understand?\nyes\nTherefore, the answer to the original question is False"}
{"prompt":"Question: Is myocardial infarction a brain problem?\nTake it step by step:","completion":" #1 Which organ in the body does myocardial infarction affect?\nthe heart\n#2 Is the heart the same as the brain?\nno\nTherefore, the answer to the original question is False"}
{"prompt":"Question: Did Northwest Airlines' longevity surpass Betty White?\nTake it step by step:","completion":" #1 How many years was Northwest Airlines in business?\n1926\n#2 How old is Betty White?\n1922\n#3 Is 1926 greater than 1922?\nyes\nTherefore, the answer to the original question is False"}
{"prompt":"Question: Could you windsurf in Puerto Rico during Hurricane Maria?\nTake it step by step:","completion":" #1 What wind speed did Hurricane Maria reach?\n175 mph\n#2 Above what wind speed is windsurf extremely dangerous?\n60 knots\n#3 Is 60 knots greater than or equal to 175 mph?\nno\nTherefore, the answer to the original question is False"}
{"prompt":"Question: Do tourists prefer Tuvalu to Niue?\nTake it step by step:","completion":" #1 What is the average number of tourists that visit Tuvalu annually?\n360\n#2 What is the average number of tourists that visit Niue annually?\n1.6 million\n#3 Is 360 more than 1.6 million?\nno\nTherefore, the answer to the original question is False"}
{"prompt":"Question: Were muskets used in the Pacific War?\nTake it step by step:","completion":" #1 When was the Pacific War?\n7\/8 December 1941\n#2 When did muskets become obsolete?\nc. 1870\n#3 Is 7\/8 December 1941 before c. 1870?\nno\nTherefore, the answer to the original question is False"}
{"prompt":"Question: Does autopilot rely on fossil fuels?\nTake it step by step:","completion":" #1 What uses autopilot?\naircraft, marine craft or spacecraft\n#2 What powers aircraft, marine craft or spacecraft?\nJet fuel\n#3 Does Jet fuel rely on fossil fuels to run?\nyes\nTherefore, the answer to the original question is True"}
{"prompt":"Question: Can nitric acid break the Louvre?\nTake it step by step:","completion":" #1 What materials were used to build the Louvre?\nglass segments and metal poles\n#2 Can any of glass segments and metal poles be destroyed by nitric acid?\nyes\nTherefore, the answer to the original question is True"}
{"prompt":"Question: Would a Durian be dangerous if it fell on your head?\nTake it step by step:","completion":" #1 How much does a durian usually weigh?\none to three kilograms (2 to 7 lb).\n#2 What is the rind of a durian covered with?\nthorn\n#3 Is an object with a weight of one to three kilograms (2 to 7 lb). covered with thorn dangerous?\nyes\nTherefore, the answer to the original question is True"}
{"prompt":"Question: Did the Coen brothers ever collaborate with the Brothers Grimm?\nTake it step by step:","completion":" #1 In what century were the Coen brothers born?\n1954\n#2 In what century did the Brothers Grimm die?\n1863\n#3 Is 1954 before 1863?\nno\nTherefore, the answer to the original question is False"}
{"prompt":"Question: Can an Asian black bear use chopsticks?\nTake it step by step:","completion":" #1 In order to use chopsticks, what body part does one need?\nthumb\n#2 Do Asian black bears have thumb?\nno\nTherefore, the answer to the original question is False"}
{"prompt":"Question: Are rainbows devoid of color made by mixing yin and yang colors?\nTake it step by step:","completion":" #1 What colors do the 'yin and yang' concept represent?\ndark-bright\n#2 What are the colors of the rainbow?\nred, orange, yellow, green, blue, indigo and violet\n#3 What color would be obtained by mixing dark-bright?\nGrey\n#4 Is Grey included in red, orange, yellow, green, blue, indigo and violet?\nyes\nTherefore, the answer to the original question is True"}
{"prompt":"Question: Does Jerry Seinfeld hang out at the Budweiser Party Deck?\nTake it step by step:","completion":" #1 Where is The Budweiser Party Deck located?\nnear the right field foul pole\n#2 Which sports team is near the right field foul pole home to?\nNew York City FC\n#3 Is Jerry Seinfeld a fan of New York City FC?\nno\nTherefore, the answer to the original question is False"}
{"prompt":"Question: Do most fans follow Katy Perry for gospel music?\nTake it step by step:","completion":" #1 What type of music is Katy Perry known for?\nsecular\n#2 Is Gospel music the same as secular?\nyes\nTherefore, the answer to the original question is False"}
{"prompt":"Question: Does the Eighth Amendment to the United States Constitution protect freedom of speech?\nTake it step by step:","completion":" #1 What changes were made by the Eighth Amendment to the United States Constitution?\nExcessive bail shall not be required, nor excessive fines imposed, nor cruel and unusual punishments inflicted\n#2 Is the protection of freedom of speech among Excessive bail shall not be required, nor excessive fines imposed, nor cruel and unusual punishments inflicted?\nyes\nTherefore, the answer to the original question is False"}
{"prompt":"Question: Could all of the famous Apollo's hypothetically defeat all of the famous D'Artagnan's?\nTake it step by step:","completion":" #1 Who were the famous D'artagnan?\ncount d'Artagnan\n#2 Who were the famous Apollos?\nNeil Armstrong and Buzz Aldrin\n#3 What special power did one of the Neil Armstrong and Buzz Aldrin's have?\nprophetic\n#4 Can count d'Artagnan be defeated by someone who is prophetic?\nyes\nTherefore, the answer to the original question is True"}
{"prompt":"Question: Can Family of Barack Obama ride comfortably in 2020 Jaguar F Type?\nTake it step by step:","completion":" #1 How many people are in Barack Obama's immediate family?\ntwo\n#2 How many people can sit in a 2020 Jaguar F Type?\ntwo\n#3 Is two greater than two?\nyes\nTherefore, the answer to the original question is False"}
{"prompt":"Question: Do Elementary School students typically need graphing calculators?\nTake it step by step:","completion":" #1 What grades are part of elementary schools?\nfour to eleven\n#2 Out of all the grades in four to eleven, what do students in the highest grade learn in math?\nalgorism\n#3 What topics in math require students to use graphing calculators?\ncalculus courses\n#4 Is algorism the same s calculus courses?\nno\nTherefore, the answer to the original question is False"}
{"prompt":"Question: Would King Leonidas have succeeded with an army the size of Mozart's compositions?\nTake it step by step:","completion":" #1 How many compositions did Mozart write?\nmore than 600\n#2 How many soldiers did King Leonidas lead?\n1,200\n#3 Is more than 600 larger than 1,200?\nno\nTherefore, the answer to the original question is False"}
{"prompt":"Question: Did the leader of Heaven's Gate consider himself a prophet?\nTake it step by step:","completion":" #1 Who was the leader of Heaven's Gate?\nMarshall Applewhite\n#2 What did Marshall Applewhite say he was called upon to do?\ndivine messengers\n#3 What is the definition of a prophet?\nan individual who is regarded as being in contact with a divine being\n#4 Is divine messengers the same as an individual who is regarded as being in contact with a divine being?\nno\nTherefore, the answer to the original question is True"}
{"prompt":"Question: Are the names of The Powerpuff Girls alliterative? \nTake it step by step:","completion":" #1 What are the names of The Powerpuff Girls?\nBlossom, Bubbles, and Buttercup\n#2 What features are necessary for a group of words to be considered alliterative?\nconspicuous repetition of identical initial consonant sounds in successive or closely associated syllables\n#3 Are conspicuous repetition of identical initial consonant sounds in successive or closely associated syllables present in Blossom, Bubbles, and Buttercup?\nyes\nTherefore, the answer to the original question is True"}
{"prompt":"Question: Would Cardi B. benefit from soy milk?\nTake it step by step:","completion":" #1 What food intolerance does Cardi B. suffer from?\n.\n#2 What must people with . avoid?\nLactose intolerance\n#3 Is soy milk free from Lactose intolerance?\nno\nTherefore, the answer to the original question is True"}
{"prompt":"Question: Phileas Fogg's around the world would be difficult to achieve during Pope John Paul I's reign?\nTake it step by step:","completion":" #1 How long did it take Phileas Fogg to go around the world?\nEighty Days\n#2 How long did Pope John Paul I reign?\nshortest\n#3 Is Eighty Days longer than shortest?\nno\nTherefore, the answer to the original question is True"}
{"prompt":"Question: Are deaf people left out of enjoying music?\nTake it step by step:","completion":" #1 In what different ways can music be perceived?\nlongitudinal waves and also as a transverse wave\n#2 Does partial or total hearing loss make one unable to detect any of longitudinal waves and also as a transverse wave?\nyes\nTherefore, the answer to the original question is False"}
{"prompt":"Question: Can someone with celiac disease have potato vodka?\nTake it step by step:","completion":" #1 For people with celiac disease, what must they avoid?\nModerate quantities of oats, free of contamination with other gluten-containing grains\n#2 Does Potato Vodka contain Moderate quantities of oats, free of contamination with other gluten-containing grains?\nyes\nTherefore, the answer to the original question is True"}
{"prompt":"Question: Are cucumbers often found in desert?\nTake it step by step:","completion":" #1 What food group is a cucumber?\nvegetables\n#2 Does vegetables grow in the desert?\nyes\nTherefore, the answer to the original question is False"}
{"prompt":"Question: Is it bad to have lactic acid in your body?\nTake it step by step:","completion":" #1 What are the functions of lactic acid in the human body?\nendogenous agonist of hydroxycarboxylic acid receptor 1\n#2 Is a majority of endogenous agonist of hydroxycarboxylic acid receptor 1 harmful to the body?\nno\nTherefore, the answer to the original question is False"}
{"prompt":"Question: Can someone with dermatitis be a hand model?\nTake it step by step:","completion":" #1 What does dermatitis cauas a person's skin to look like?\nred\n#2 What must a hand model's skin look like?\nflawless\n#3 Is red the same as flawless?\nno\nTherefore, the answer to the original question is False"}
{"prompt":"Question: Does ancient Olympics crown fail to hide tonsure?\nTake it step by step:","completion":" #1 Which part of the head is affected by tonsure?\nscalp\n#2 What kind of crown was given to winners in ancient Olympics?\nolive leaf wreaths or crowns\n#3 Does olive leaf wreaths or crowns cover scalp when worn?\nyes\nTherefore, the answer to the original question is True"}
{"prompt":"Question: Can dessert be made with vegetables?\nTake it step by step:","completion":" #1 What are some popularly known desserts?\nconfections\n#2 Do any of confections contain vegetables?\nno\nTherefore, the answer to the original question is True"}
{"prompt":"Question: Was proofreading Edgar Allan Poe works lucrative?\nTake it step by step:","completion":" #1 What is the typical length of each of Edgar Allan Poe's works?\nshort stories\n#2 Is short stories relatively long?\nyes\nTherefore, the answer to the original question is False"}
{"prompt":"Question: Can Roman numerals fill the normal number of Sudoku box options?\nTake it step by step:","completion":" #1 How many symbols are used in the Roman numeral system?\nseven\n#2 How many numbers are employed in Sudoku?\n9×9\n#3 Is seven greater than or equal to 9×9?\nno\nTherefore, the answer to the original question is False"}
{"prompt":"Question: Does being good at guitar hero make you a good guitarist?\nTake it step by step:","completion":" #1 How is a guitar played?\nwith both hands\n#2 How is Guitar Hero played?\nuse a guitar-shaped game controller\n#3 Do the steps in with both hands match those of use a guitar-shaped game controller?\nyes\nTherefore, the answer to the original question is False"}
{"prompt":"Question: Did any citizen of San Antonio vote for Boris Johnson?\nTake it step by step:","completion":" #1 Is San Antonio a city in the UK?\nSan Antonio\n#2 Is Boris Johnson the Prime Minister of the UK?\nWhile forming his government, Johnson dismissed 11 senior ministers\n#3 Are American citizens allowed to vote in the UK elections?\napplicants who are Commonwealth citizens must either possess leave to enter or remain in the UK\n#4 Are San Antonio and applicants who are Commonwealth citizens must either possess leave to enter or remain in the UK the same answer as While forming his government, Johnson dismissed 11 senior ministers?\nyes\nTherefore, the answer to the original question is False"}
{"prompt":"Question: Will Justin Bieber take over Mike Pence's position in 2020?\nTake it step by step:","completion":" #1 What is Mike Pence's present position?\nvice president\n#2 What is the age\/nationality requirement to be a vice president?\nat least 35 years old\n#3 What is Justin Bieber's age\/nationality by 2020?\nCanadian\n#4 Does Canadian match at least 35 years old?\nno\nTherefore, the answer to the original question is False"}
{"prompt":"Question: Was Mozart accused of stealing from Richard Wagner?\nTake it step by step:","completion":" #1 When did Mozart die?\n5 December 1791\n#2 When was Richard Wagner born?\n22 May 1813\n#3 Is 22 May 1813 an earlier date than 5 December 1791?\nno\nTherefore, the answer to the original question is False"}
{"prompt":"Question: Do seven McDonald's hamburgers exceed USDA recommended fat allowance?\nTake it step by step:","completion":" #1 How much fat is in a McDonald's hamburger?\nMcDonald's\n#2 What is McDonald's multiplied by 7?\nyes\n#3 How many grams of fat per day does the USDA recommend for the average person?\nRecommended Dietary Allowances (RDA), the daily dietary intake level of a nutrient considered sufficient by the Food and Nutrition Board of the Institute of Medicine\n#4 Is yes greater than the maximum value of Recommended Dietary Allowances (RDA), the daily dietary intake level of a nutrient considered sufficient by the Food and Nutrition Board of the Institute of Medicine?\nyes\nTherefore, the answer to the original question is False"}
{"prompt":"Question: Can children become lieutenants?\nTake it step by step:","completion":" #1 What position in a hierarchical system does lieutenant imply?\nsecond junior-most\n#2 Would a gang use the system and assign children to second junior-most positions?\nyes\nTherefore, the answer to the original question is True"}
{"prompt":"Question: Could SNL be why Jenny McCarthy does not get along with her cousin?\nTake it step by step:","completion":" #1 Who is Jenny McCarthy's cousin?\nMelissa McCarthy\n#2 What show has Melissa McCarthy been a frequent guest of?\nSaturday Night Live\n#3 Was Jenny McCarthy made fun of on Saturday Night Live?\nno\nTherefore, the answer to the original question is True"}
{"prompt":"Question: Would Phineas and Ferb enjoy winter?\nTake it step by step:","completion":" #1 What is Phineas and Ferb?\nan American animated musical comedy television series\n#2 What season does an American animated musical comedy television series take place during?\nsummer\n#3 Why do Phineas and Ferb enjoy summer?\nseek ways to occupy their time\n#4 If it were winter, would Phineas and Ferb still have seek ways to occupy their time?\nyes\nTherefore, the answer to the original question is False"}
{"prompt":"Question: Is H's most common two letter pair partner a freebie in Wheel of Fortune bonus round?\nTake it step by step:","completion":" #1 What letter forms the most common two letter pair in English along with the letter H?\nTh\n#2 What free letters does the Wheel of Fortune bonus round give players?\nR, S, T, L or N, and E\n#3 Is Th included in R, S, T, L or N, and E?\nno\nTherefore, the answer to the original question is True"}
{"prompt":"Question: Can Curiosity take samples of rocks from Lacus Temporis?\nTake it step by step:","completion":" #1 Which planet is Curiosity on?\nMars\n#2 Where is Lacus Temporis located?\nthe northeastern quadrant of the Moon's near side\n#3 Is Mars the same as the northeastern quadrant of the Moon's near side?\nno\nTherefore, the answer to the original question is False"}
{"prompt":"Question: Is the title of Shirley Bassey's 1971 diamond song a true statement?\nTake it step by step:","completion":" #1 What is the title to Shirley Bassey's 1971 diamond song?\nDiamonds Are Forever\n#2 Do diamonds last for the time span in Diamonds Are Forever?\nno\nTherefore, the answer to the original question is False"}
{"prompt":"Question: Can Tame Impala's studio band play a proper game of Hot Potato?\nTake it step by step:","completion":" #1 How many studio members are in Tame Impala's band?\ntouring act, Tame Impala consists of Parker (guitar, vocals), Dominic Simper (guitar, synthesiser), Jay Watson (synthesiser, vocals, guitar), Cam Avery (bass guitar, vocals), and Julien Barbagallo (drums, vocals).\n#2 What is the minimum number of people that can play hot potato?\nHot potato is a party game that involves players gathering in a circle and tossing a small object such as a beanbag or even a real potato to each other while music plays.\n#3 Is touring act, Tame Impala consists of Parker (guitar, vocals), Dominic Simper (guitar, synthesiser), Jay Watson (synthesiser, vocals, guitar), Cam Avery (bass guitar, vocals), and Julien Barbagallo (drums, vocals). greater than or equal to Hot potato is a party game that involves players gathering in a circle and tossing a small object such as a beanbag or even a real potato to each other while music plays.?\nno\nTherefore, the answer to the original question is False"}
{"prompt":"Question: Can a cell fit inside of a shoebox?\nTake it step by step:","completion":" #1 How big is a cell?\nsmall room\n#2 How big is a shoebox?\n.\n#3 Is small room smaller than .?\nno\nTherefore, the answer to the original question is True"}
{"prompt":"Question: Is US route 1 dominated by historically red states?\nTake it step by step:","completion":" #1 What states does US Rte. 1 pass through?\nSoutheastern United States to New England\n#2 How many states in Southeastern United States to New England are historically \"red states\"?\n19\n#3 How many states in Southeastern United States to New England are historically \"blue states\"?\n31\n#4 Is 19 greater than 31?\nno\nTherefore, the answer to the original question is False"}
{"prompt":"Question: Is overfeeding Lactobacillus unwise for people without dental insurance?\nTake it step by step:","completion":" #1 What are the products of Lactobacillus?\nprobiotic found in food\n#2 What conditions are caused by probiotic found in food?\ntooth decay known as caries\n#3 What medical procedures would be required to fix tooth decay known as caries?\nonce a filling is performed it will eventually have to be redone\n#4 Would once a filling is performed it will eventually have to be redone be more affordable with dental insurance?\nyes\nTherefore, the answer to the original question is True"}
{"prompt":"Question: Does Pikachu like Charles Darwin?\nTake it step by step:","completion":" #1 How does a Pokemon improve upon itself? \nIf a Pokémon fully defeats an opponent in battle so that the opponent is knocked out (\"faints\"), the winning Pokémon gains experience points and may level up\n#2 What theory is Charles Darwin best known for?\nthe science of evolution\n#3 Is If a Pokémon fully defeats an opponent in battle so that the opponent is knocked out (\"faints\"), the winning Pokémon gains experience points and may level up and the science of evolution related?\nyes\nTherefore, the answer to the original question is True"}
{"prompt":"Question: Is nickel a better payout than mercury if given a dollar per atomic number?\nTake it step by step:","completion":" #1 What is nickel's atomic number?\n28\n#2 What is Mercury's atomic number?\n80\n#3 Is 28 greater than 80?\nno\nTherefore, the answer to the original question is False"}
{"prompt":"Question: Would a duck ever need a Caesarean section?\nTake it step by step:","completion":" #1 Cesarean sections are only performed on animals that produce offspring via what method?\nsurgery\n#2 What method do ducks use to produce offspring?\nThe female lays eight to 13 creamy white to greenish-buff spotless eggs, on alternate days\n#3 Is The female lays eight to 13 creamy white to greenish-buff spotless eggs, on alternate days the same as surgery?\nno\nTherefore, the answer to the original question is False"}
{"prompt":"Question: Can Aerosmith fit in a 2020 Mitsubishi Outlander?\nTake it step by step:","completion":" #1 How many people are members of the band Aerosmith?\nAerosmith\n#2 What is the searing capacity of the 2020 Mitsubishi Outlander?\nseven\n#3 Is seven greater than or equal to Aerosmith?\nno\nTherefore, the answer to the original question is True"}
{"prompt":"Question: Could all of the people who pass through 30th Street Station every day fit in Dorton Arena?\nTake it step by step:","completion":" #1 How many people can sit in J. S. Dorton Arena?\n7,610\n#2 How many people passed through the 30th Street Station daily in 2013?\n12,000\n#3 Is 7,610 greater than or equal to 12,000?\nno\nTherefore, the answer to the original question is False"}
{"prompt":"Question: Did any of the amazons on Xena: Warrior Princess star on later shows?\nTake it step by step:","completion":" #1 Who played the roles of Amazons on Xena: Warrior Princess?\nDanielle Cormack\n#2 Did Melinda Clarke do any other shows after Xena\" Warrior Princess?\nFirefly\n#3 Is Firefly listed in Danielle Cormack?\nno\nTherefore, the answer to the original question is True"}
{"prompt":"Question: Can you purchase General Motors products at a movie theater?\nTake it step by step:","completion":" #1 What kinds of products does General Motors sell?\nvehicles and vehicle parts\n#2 What kinds of products are sold in movie theaters?\nsoft drinks, popcorn, and candy\n#3 Are vehicles and vehicle parts the same as soft drinks, popcorn, and candy?\nno\nTherefore, the answer to the original question is False"}
{"prompt":"Question: Would a CEO typically clean the toilets in a company's building?\nTake it step by step:","completion":" #1 What are the general duties of the CEO of an organization?\nbeing a decision maker on strategy and other key policy issues, leader, manager, and executor\n#2 Is cleaning the toilets of the company's building one of being a decision maker on strategy and other key policy issues, leader, manager, and executor?\nyes\nTherefore, the answer to the original question is False"}
{"prompt":"Question: Was Dioskourides a lapidary?\nTake it step by step:","completion":" #1 What is a lapidary?\nan artist or artisan\n#2 What do an artist or artisan's do once they finish their work?\nPolishing\n#3 Did Dioskourides do an artist or artisan and Polishing?\nyes\nTherefore, the answer to the original question is True"}
{"prompt":"Question: Could Quartz be useful to humans if plants died off and there was no oxygen?\nTake it step by step:","completion":" #1 What are the constituents elements of quartz?\nsilicon and oxygen atoms\n#2 Is oxygen included in silicon and oxygen atoms?\nno\nTherefore, the answer to the original question is True"}
{"prompt":"Question: Can United States Secretary of State do crimes in U.K. without being arrested?\nTake it step by step:","completion":" #1 Under which agreement is modern diplomatic immunity applicable?\nVienna Convention on Diplomatic Relations\n#2 Which countries have signed Vienna Convention on Diplomatic Relations?\n192\n#3 Is the U.K. included in 192?\nyes\nTherefore, the answer to the original question is True"}
{"prompt":"Question: Can you see the moon in Wembley Arena?\nTake it step by step:","completion":" #1 What is Wembley Arena?\nan indoor arena\n#2 Where is the moon located?\norbiting Earth\n#3 Can you see orbiting Earth from an indoor arena?\nyes\nTherefore, the answer to the original question is False"}
{"prompt":"Question: Does Homer Simpson need two hands worth of fingers to count to 5?\nTake it step by step:","completion":" #1 How many fingers does Homer Simpson have on each hand?\n266\n#2 Is 266 less than 5?\nno\nTherefore, the answer to the original question is True"}
{"prompt":"Question: Does open heart surgery finish before entirety of American Ballet Theatre's Swan Lake?\nTake it step by step:","completion":" #1 How long is a performance of Swan Lake?\ntwo acts\n#2 How long does it take to perform a coronary artery bypass?\npedicled\n#3 Is two acts longer than pedicled?\nno\nTherefore, the answer to the original question is False"}
{"prompt":"Question: Is Rand Paul guilty of catch-phrase used to attack John Kerry in 2004?\nTake it step by step:","completion":" #1 What catch-phrase was used against John Kerry in 2004?\n\"flip-flopping\"\n#2 What policy changes has Rand Paul expressed?\nhigher deductibles as well as changes to premiums or eligibility rules\n#3 Would higher deductibles as well as changes to premiums or eligibility rules be considered \"flip-flopping\"?\nno\nTherefore, the answer to the original question is True"}
{"prompt":"Question: Does Robert De Niro use a microscope at work?\nTake it step by step:","completion":" #1 What general profession uses a microscope?\nMicroscopy\n#2 What is Robert De Niro's profession?\nactor, producer, and director\n#3 Is Microscopy the same as actor, producer, and director?\nno\nTherefore, the answer to the original question is False"}
{"prompt":"Question: Would Gordon Ramsey use uranium as a seasoning?\nTake it step by step:","completion":" #1 What was Gordon Ramsay's major occupation?\nchef\n#2 Is Uranium commonly used as seasoning by a chef?\nno\nTherefore, the answer to the original question is False"}
{"prompt":"Question: Would Jacques Duèze have been friends with Richard Dawkins?\nTake it step by step:","completion":" #1 What is the occupation of Jacques Duèze?\nhead of the Catholic Church\n#2 In what field or industry is head of the Catholic Church?\nstate\n#3 Is state a field or industry which Richard Dawkins supports?\nyes\nTherefore, the answer to the original question is False"}
{"prompt":"Question: Was Robert Downey Jr. a good role model as a young man?\nTake it step by step:","completion":" #1 Did Robert Downey Jr. completely avoid dangerous, irresponsible behavior as a young adult?\nyes\nTherefore, the answer to the original question is False"}
{"prompt":"Question: Did Melania Trump have same profession as Olga Kurylenko?\nTake it step by step:","completion":" #1 What professions has Melania Trump had?\nmodel and businesswoman\n#2 What professions has Olga Kurylenko had?\nactress, model, teacher\n#3 Is at least one profession listed in model and businesswoman also found in actress, model, teacher?\nyes\nTherefore, the answer to the original question is True"}
{"prompt":"Question: Is the BBC World Service hosted in Europe?\nTake it step by step:","completion":" #1 Where is the BBC World Service located?\nBroadcasting House in London\n#2 Is Broadcasting House in London located in Europe?\nno\nTherefore, the answer to the original question is True"}
{"prompt":"Question: Was Mother Theresa a follower of atheism?\nTake it step by step:","completion":" #1 What was Mother Teresa's religion?\nRoman Catholic\n#2 Can an adherent of Roman Catholic be regarded a follower of atheism?\nyes\nTherefore, the answer to the original question is False"}
{"prompt":"Question: Is it possible to binge entire EastEnders series without water?\nTake it step by step:","completion":" #1 How many days can a human last without water?\nthree to five\n#2 How many episodes are there in the EastEnders series?\n68\n#3 How many days would it take to binge watch 68 average-length episodes?\nEastEnders\n#4 Is EastEnders less than or equal to three to five?\nyes\nTherefore, the answer to the original question is False"}
{"prompt":"Question: Would stargazers prefer binoculars over a telescope?\nTake it step by step:","completion":" #1 How does the scope of a stargazer's observation vary?\ncitizen science\n#2 Does citizen science stay the same?\nyes\nTherefore, the answer to the original question is False"}
{"prompt":"Question: Would Carrie Poppy be likely to trust a psychic?\nTake it step by step:","completion":" #1 What is Carrie Poppy's profession?\nwriter and actress\n#2 What show is Carrie Poppy the writer and actress of?\nOh No, Ross and Carrie!\n#3 What is the main of Oh No, Ross and Carrie!?\nBlocher and Poppy\n#4 On Blocher and Poppy, what stance does Carrie Poppy take as a reporter?\nvegan\n#5 Would someone who is vegan likely trust psychics?\nyes\nTherefore, the answer to the original question is False"}
{"prompt":"Question: Did Francois Mitterrand ever meet Barak Obama while they both held the position of President?\nTake it step by step:","completion":" #1 When was Mitterand's final year as President of France?\n1995\n#2 When was Obama's first year as President of the United States?\n2009\n#3 Is 2009 before 1995?\nno\nTherefore, the answer to the original question is False"}
{"prompt":"Question: Was Jackson Pollock trained by Leonardo da Vinci?\nTake it step by step:","completion":" #1 When did Leonardo da Vinci die?\n2 May 1519\n#2 When was Jackson Pollock born?\n1912\n#3 Is 1912 before 2 May 1519?\nno\nTherefore, the answer to the original question is False"}
{"prompt":"Question: Is the Mona Lisa in the same museum as the Venus de Milo?\nTake it step by step:","completion":" #1 What museum stores the Mona Lisa?\nLouvre Museum\n#2 What museum stores the Venus de Milo?\nthe Louvre\n#3 Is Louvre Museum the same as the Louvre?\nno\nTherefore, the answer to the original question is True"}
{"prompt":"Question: Did Confederate States Army influence West Point fashion?\nTake it step by step:","completion":" #1 What were the main features of the Confederate States Army uniforms?\nfaded, patched-together regulation uniforms\n#2 What are the most notable features of West Point uniforms?\nexceptionally presentable\n#3 Is there a significant overlap between faded, patched-together regulation uniforms and exceptionally presentable?\nno\nTherefore, the answer to the original question is True"}
{"prompt":"Question: Is it possible for biologist Rachel Carson to have flown to the moon?\nTake it step by step:","completion":" #1 When did Rachel Carson die?\nApril 14, 1964\n#2 When did humans first land on the moon?\nJuly 20, 1969\n#3 Is July 20, 1969 before April 14, 1964?\nno\nTherefore, the answer to the original question is False"}
{"prompt":"Question: Can 1980 United States presidential election result be considered a photo finish?\nTake it step by step:","completion":" #1 Who ran for the Democrats in the 1980 US presidential election?\nJimmy Carter\n#2 Who ran for the Republicans in the 1980 US presidential election?\nRonald Reagan\n#3 How many electoral votes did Jimmy Carter receive?\n49\n#4 How many electoral votes did Ronald Reagan receive?\n489\n#5 Is 49 close to 489?\nyes\nTherefore, the answer to the original question is False"}
{"prompt":"Question: Could a monolingual American read Lenovo's native name?\nTake it step by step:","completion":" #1 What is Lenovo's native name?\nChinese\n#2 What language is Chinese in?\nEast Asian\n#3 What language does a monolingual American speak?\nEnglish\n#4 Is English the same as East Asian?\nno\nTherefore, the answer to the original question is False"}
{"prompt":"Question: Would an environmentalist advocate for preventing domestic canine reproduction?\nTake it step by step:","completion":" #1 What do environmentalists try to protect?\nthe quality of the natural environment\n#2 Do domestic dogs harm the quality of the natural environment?\nyes\nTherefore, the answer to the original question is True"}
{"prompt":"Question: Are there options for students who struggle to understand the writing style of Othello?\nTake it step by step:","completion":" #1 What is the name of a line of books that translate the language of Shakespeare plays into modern English?\nNo Fear Shakespeare\n#2 Does No Fear Shakespeare feature Othello in their book lineup?\nno\nTherefore, the answer to the original question is True"}
{"prompt":"Question: Would most grand masters know what the French Defense is?\nTake it step by step:","completion":" #1 What is the French Defence?\na chess opening\n#2 What is a Grandmaster?\na title awarded to chess players\n#3 Would a title awarded to chess players likely know what a chess opening is?\nyes\nTherefore, the answer to the original question is True"}
{"prompt":"Question: Is MF Doom a Fantastic Four villain?\nTake it step by step:","completion":" #1 Which villains are featured in Fantastic Four?\nthe Mole Man, the Skrulls, Namor the Sub-Mariner, Doctor Doom, the Puppet Master, Kang the Conqueror\/Rama-Tut\/Immortus, Blastaar, the Frightful Four, Annihilus, Galactus, and Klaw\n#2 Is MF doom one of the Mole Man, the Skrulls, Namor the Sub-Mariner, Doctor Doom, the Puppet Master, Kang the Conqueror\/Rama-Tut\/Immortus, Blastaar, the Frightful Four, Annihilus, Galactus, and Klaw?\nno\nTherefore, the answer to the original question is False"}
{"prompt":"Question: Is Snow White an example of good consent?\nTake it step by step:","completion":" #1 What conditions can prevent someone from giving consent?\nintoxicated, unconscious or asleep\n#2 Was Snow White free of any of intoxicated, unconscious or asleep?\nno\nTherefore, the answer to the original question is False"}
{"prompt":"Question: Will Gremlins sequels tie number of Matrix sequels?\nTake it step by step:","completion":" #1 How many sequels did The Matrix have?\ntwo\n#2 How many sequels did Gremlins have?\n1990\n#3 How many Gremlins movies are currently being worked on?\n3\n#4 What is the sum of 1990 and 3?\nThe Matrix\n#5 Is The Matrix equal to two?\nno\nTherefore, the answer to the original question is True"}
{"prompt":"Question: Is the tree species that the name Leipzig refers to an evergeen tree?\nTake it step by step:","completion":" #1 Which species of tree is mentioned in the meaning of the name (of a city) Leipzig?\nlinden\n#2 Classifying by seasonal traits, what kind of tree is linden?\nhermaphroditic\n#3 Is being evergreen a characteristic of hermaphroditic?\nyes\nTherefore, the answer to the original question is False"}
{"prompt":"Question: Can Kate Gosselin's household fill out a Bandy team?\nTake it step by step:","completion":" #1 How many players make up a Bandy team?\n11\n#2 How many people are in Kate Gosselin's household?\nfour\n#3 Is four greater than or equal to 11?\nno\nTherefore, the answer to the original question is False"}
{"prompt":"Question: Is Michael Vick on People for the Ethical Treatment of Animals's hypothetical blacklist?\nTake it step by step:","completion":" #1 What do the People for the Ethical Treatment of Animals advocate for?\nanimal rights\n#2 What crime has Michael Vick done time for?\ndog fighting ring\n#3 Does dog fighting ring strongly violate animal rights?\nyes\nTherefore, the answer to the original question is True"}
{"prompt":"Question: Was dynamite used during Middle Ages warfare?\nTake it step by step:","completion":" #1 When was dynamite invented?\n1860s\n#2 When did the Middle Ages warfare take place?\npredated the use of supply trains\n#3 Is 1860s within or before predated the use of supply trains?\nyes\nTherefore, the answer to the original question is False"}
{"prompt":"Question: Would Downton Abbey finale viewership defeat every Kazakhstan citizen in tug of war?\nTake it step by step:","completion":" #1 How many people watched Downton Abbey finale?\nyes\n#2 How many people are Kazakh citizens?\n18,137,300\n#3 Is yes greater than 18,137,300?\nno\nTherefore, the answer to the original question is False"}
{"prompt":"Question: Is MIX a word and a roman numeral?\nTake it step by step:","completion":" #1 What does Mix mean in english language?\ncombining multitrack recordings\n#2 Is Mix a number in Roman numerals?\n1009\n#3 Based on combining multitrack recordings and 1009, is mix both a word and a roman numeral?\nno\nTherefore, the answer to the original question is True"}
{"prompt":"Question: Could Little Women have been a book read by veterans of the civil war?\nTake it step by step:","completion":" #1 When was the book Little Women written?\nover several months\n#2 When did the civil war take place?\n1861 to 1865\n#3 Could adults as of 1861 to 1865 still be alive by over several months?\nyes\nTherefore, the answer to the original question is True"}
{"prompt":"Question: Will a celibate cleric likely suffer a stoning in Somalia?\nTake it step by step:","completion":" #1 Which crime is punishable by stoning in Somalia?\nadultery\n#2 What relationship must a person guilty of adultery be in in order to be deemed guilty?\nextramarital\n#3 Would a celibate cleric be involved in extramarital?\nno\nTherefore, the answer to the original question is False"}
{"prompt":"Question: Would a Gray Whale fit easily in an above ground pool?\nTake it step by step:","completion":" #1 What is the average size of an above ground pool?\n3.7 m × 7.3 m\n#2 What is the size of average gray whale?\n14.9 meters\n#3 Is 14.9 meters smaller than 3.7 m × 7.3 m?\nno\nTherefore, the answer to the original question is False"}
{"prompt":"Question: Do you need lactobacillus to make pickles?\nTake it step by step:","completion":" #1 What are some common methods of making pickles?\nanaerobic fermentation in brine or immersion in vinegar\n#2 Is lactobacillus required for all of anaerobic fermentation in brine or immersion in vinegar?\nyes\nTherefore, the answer to the original question is False"}
{"prompt":"Question: Did Holy Saturday 2019 have special significance to pot smokers?\nTake it step by step:","completion":" #1 What date was Holy Saturday in 2019?\n19 April\n#2 What date is an unofficial holiday for pop smokers?\nApril 20\n#3 Is 19 April the same as April 20?\nno\nTherefore, the answer to the original question is True"}
{"prompt":"Question: Did people in Korea under Japanese Rule watch a lot of Iron Chef?\nTake it step by step:","completion":" #1 During what years was Korea under the rule of the Japanese?\nbetween 1910 and 1945\n#2 In what year did Iron Chef first appear on television?\n1993\n#3 Did between 1910 and 1945 occur after 1993?\nno\nTherefore, the answer to the original question is False"}
{"prompt":"Question: Is shoe soup innocuous?\nTake it step by step:","completion":" #1 What film director ate shoe soup in the year 1980?\nWerner Herzog\n#2 Is Werner Herzog still alive?\nyes\nTherefore, the answer to the original question is True"}
{"prompt":"Question: In a hypothetical race between a Swallow and an American Woodcock, would the Swallow win?\nTake it step by step:","completion":" #1 How quickly can a swallow fly?\nfast\n#2 How quickly can an American woodcock fly?\n16 to 28 miles per hour\n#3 Is fast greater than 16 to 28 miles per hour?\nno\nTherefore, the answer to the original question is True"}
{"prompt":"Question: Can a sea turtle play tennis using a tennis racket?\nTake it step by step:","completion":" #1 What body part does one need to hold a tennis racket?\npalm of hand\n#2 Do turtles have palm of hand?\nyes\nTherefore, the answer to the original question is False"}
{"prompt":"Question: Are right wing Amreicans opposed to marxism?\nTake it step by step:","completion":" #1 What stance do most right-wing Americans take towards socialism?\nopposes\n#2 Is opposes against that which Marxists proposes on the subject?\nno\nTherefore, the answer to the original question is True"}
{"prompt":"Question: Are there Americans still enlisted in the Confederate States Army?\nTake it step by step:","completion":" #1 What is the present status of the Confederate States Army?\ncollapse\n#2 Considering collapse, can there still be anyone enlisted?\nno\nTherefore, the answer to the original question is False"}
{"prompt":"Question: Can Stone Cold Steve Austin apply his finisher to a mule deer?\nTake it step by step:","completion":" #1 What activity is involved in Stone Cold Steve Austin's finisher?\nboot to the gut\n#2 How much does a mule deer weigh?\n55–150 kg (121–331 lb),\n#3 What was the weight of Stone Cold Steve Austin's largest opponent that he used boot to the gut on?\nHart while\n#4 Is 55–150 kg (121–331 lb), less than or equal to Hart while?\nyes\nTherefore, the answer to the original question is True"}
{"prompt":"Question: Did President William Howard Taft read DC Comics?\nTake it step by step:","completion":" #1 When was DC Comics founded?\nAutumn 1934\n#2 When did President William Howard Taft die?\nMarch 8, 1930\n#3 Is Autumn 1934 before March 8, 1930?\nno\nTherefore, the answer to the original question is False"}
{"prompt":"Question: Did Barack Obama participate in the Reformation?\nTake it step by step:","completion":" #1 When did the Reformation take place?\n16th-century Europe\n#2 When was Barack Obama born?\nAugust 4, 1961\n#3 Is August 4, 1961 before 16th-century Europe?\nno\nTherefore, the answer to the original question is False"}
{"prompt":"Question: Could you watch a new Seinfeld episode every day for a year?\nTake it step by step:","completion":" #1 How many days are there in a year?\n365\n#2 How many Seinfeld episodes are there?\n365.25\n#3 Is 365.25 greater than or equal to 365?\nno\nTherefore, the answer to the original question is False"}
{"prompt":"Question: Are honey badgers and hyenas anatomically dissimilar? \nTake it step by step:","completion":" #1 What are the features of the anal sacs of the Honey Badgers?\neversible\n#2 What are the features of the Hyenas' anal sacs?\neversible\n#3 Is eversible anatomically dissimilar from eversible?\nno\nTherefore, the answer to the original question is False"}
{"prompt":"Question: If Martin Luther did one theses a day would he run out in half a year?\nTake it step by step:","completion":" #1 How many theses did Martin Luther publish in a list?\nNinety-five\n#2 How many days are in a year?\n365.25\n#3 What is 365.25 divided by 2?\nyes\n#4 Is Ninety-five less than yes?\nyes\nTherefore, the answer to the original question is True"}
{"prompt":"Question: Would a 75 degree Fahrenheit day be unusual on the Antarctic Peninsula? \nTake it step by step:","completion":" #1 What is the average temperature in the Antarctic Peninsula?\n1 to 2 °C\n#2 Does 75 degrees Fahrenheit fall outside the range of 1 to 2 °C?\nno\nTherefore, the answer to the original question is True"}
{"prompt":"Question: Did earth complete at least one orbit around the sun during the Napoleonic Wars?\nTake it step by step:","completion":" #1 How long is the orbit of the earth around the sun?\n365.256 days\n#2 How long were the Napoleonic Wars?\n1803–1815\n#3 Is 1803–1815 greater than 365.256 days?\nno\nTherefore, the answer to the original question is True"}
{"prompt":"Question: Would a Dodo hypothetically tower over Ma Petite?\nTake it step by step:","completion":" #1 How tall were dodos?\n1 metre (3 ft 3 in)\n#2 Who played the role of Ma Petite?\nAmge\n#3 How tall is Amge?\n2 ft 0.6 in).\n#4 Is 1 metre (3 ft 3 in) greater than 2 ft 0.6 in).?\nyes\nTherefore, the answer to the original question is True"}
{"prompt":"Question: Can you find Depala's race in World of Warcraft?\nTake it step by step:","completion":" #1 What are the different races found in World of Warcraft?\norcs or trolls for the Horde, or humans or dwarves\n#2 What race is Depala?\nSlavic\n#3 Is Slavic listed in orcs or trolls for the Horde, or humans or dwarves?\nyes\nTherefore, the answer to the original question is True"}
{"prompt":"Question: Did Klingons appear in the movie The Last Jedi?\nTake it step by step:","completion":" #1 Which fictional universe do the Klingons exist in?\nStar Trek\n#2 Which fictional universe is The Last Jedi movie set in?\nStar Wars\n#3 Is Star Trek the same as Star Wars?\nno\nTherefore, the answer to the original question is False"}
{"prompt":"Question: If one of your feet is in a leg cast, should the other be in a sandal?\nTake it step by step:","completion":" #1 If you are in a leg cast, what are you likely using to help yourself walk?\nA crutch\n#2 What kind of shoes do doctors recommend for you to wear if you are using A crutch?\nOrthotics\n#3 Do sandals fit the requirements of Orthotics?\nyes\nTherefore, the answer to the original question is False"}
{"prompt":"Question: Would a triples tandem bike support Apollo 15 crew?\nTake it step by step:","completion":" #1 How many people were on the Apollo 15 mission?\n24\n#2 How many people can ride a triple tandem bike?\nthree\n#3 Is three at least 24?\nno\nTherefore, the answer to the original question is True"}
{"prompt":"Question: Would a spider wasp be more effective than a bullet ant to stop a criminal?\nTake it step by step:","completion":" #1 What is the Schmidt sting pain index of the spider wasp's sting?\n4\n#2 What is the Schmidt sting pain index of the bullet ant's sting?\nhighest rating\n#3 Is 4 greater than highest rating?\nno\nTherefore, the answer to the original question is False"}
{"prompt":"Question: Would Library of Alexandria need less shelf space than Library of Congress?\nTake it step by step:","completion":" #1 What is the number of books (and other materials) housed in the Library of Congress?\nmore than 32 million\n#2 What was the number of books (and other materials) housed in the Library of Alexandria?\nnearly half a million scrolls\n#3 Is nearly half a million scrolls less than more than 32 million?\nno\nTherefore, the answer to the original question is True"}
{"prompt":"Question: Are all cucumbers the same texture?\nTake it step by step:","completion":" #1 What texture do kirby cucumbers have?\nbumpy skin\n#2 What texture do English cucumbers have?\nlonger and slimmer\n#3 Is bumpy skin the same as longer and slimmer?\nno\nTherefore, the answer to the original question is False"}
{"prompt":"Question: Do calico cat patterns cover every drain fly color variety?\nTake it step by step:","completion":" #1 What colors do drain flies come in?\nfurry\" moth-like appearance, hence one of their common names, moth flies.\n#2 What colors are seen on calico cats?\n25% to 75% white with large orange and black patches\n#3 Is every element of furry\" moth-like appearance, hence one of their common names, moth flies. also in 25% to 75% white with large orange and black patches?\nno\nTherefore, the answer to the original question is False"}
{"prompt":"Question: Can you fit every resident of Auburn, New York, in Tropicana Field?\nTake it step by step:","completion":" #1 What is the capacity of Tropicana Field?\n41,000\n#2 What is the population of Auburn, NY?\n27,687\n#3 Is 41,000 greater than 27,687?\nno\nTherefore, the answer to the original question is True"}
{"prompt":"Question: Would a Beaver's teeth rival that of a Smilodon?\nTake it step by step:","completion":" #1 How long is a beaver's tooth?\nfour incisors\n#2 How long was a Smilodon's tooth?\n28 cm\n#3 Is four incisors larger than 28 cm?\nno\nTherefore, the answer to the original question is False"}
{"prompt":"Question: Can an Arvanite Greek understand some of the Albanian Declaration of Independence?\nTake it step by step:","completion":" #1 What languages is the Albanian Declaration of Independence written in?\nGheg and Tosk and Ottoman Turkish\n#2 What language do Arvanite Greeks speak?\nArvanitika, an Albanian\n#3 Is Arvanitika, an Albanian in Gheg and Tosk and Ottoman Turkish?\nno\nTherefore, the answer to the original question is True"}
{"prompt":"Question: Does Pantheon in Paris have a unique name?\nTake it step by step:","completion":" #1 What is referred to as the Pantheon in Paris?\na monument\n#2 What other concepts are named Pantheon?\nmythical or imaginary\n#3 Is a monument differently-named from mythical or imaginary?\nyes\nTherefore, the answer to the original question is False"}
{"prompt":"Question: Were there footprints on the moon in 1960?\nTake it step by step:","completion":" #1 When did humans first land on the moon?\nJuly 20, 1969\n#2 Is July 20, 1969 before or in 1960?\nno\nTherefore, the answer to the original question is False"}
{"prompt":"Question: Was Darth Vader monogamous?\nTake it step by step:","completion":" #1 If someone is monogamous, how many people are they committed to?\none\n#2 How many people was Darth Vader committed to?\nPadmé Amidala\n#3 Does Padmé Amidala equal one?\nyes\nTherefore, the answer to the original question is True"}
{"prompt":"Question: Would a vegan eat a traditional Paella dish?\nTake it step by step:","completion":" #1 What kind of products are forbidden in a vegan diet?\nmeat, eggs, dairy products\n#2 What are the main ingredients of Paella?\nround grain rice, bajoqueta and tavella\n#3 Are all of round grain rice, bajoqueta and tavella totally excluded from meat, eggs, dairy products?\nno\nTherefore, the answer to the original question is False"}
{"prompt":"Question: Is B's place in alphabet same as Prince Harry's birth order?\nTake it step by step:","completion":" #1 What position in the alphabet does \"B\" hold?\nsecond\n#2 What is the nominal number associated with second?\n2\n#3 Does Prince Harry have exactly 2 minus 1 older siblings?\nno\nTherefore, the answer to the original question is True"}
{"prompt":"Question: Was Mark Twain a struggling inventor?\nTake it step by step:","completion":" #1 What did Mark Twain invent?\na history trivia game\n#2 How much of a history trivia game did Mark Twain sell?\nOver 25,000\n#3 Were the sales of Over 25,000 not enough to turn a profit?\nno\nTherefore, the answer to the original question is False"}
{"prompt":"Question: Did Al Capone carry a smartphone?\nTake it step by step:","completion":" #1 In what year did Al Capone die?\n1947\n#2 What year was the first smartphone invented?\n2002\n#3 Is 1947 after 2002?\nno\nTherefore, the answer to the original question is False"}
{"prompt":"Question: Can Burundi's communicate with citizens of New Brunswick?\nTake it step by step:","completion":" #1 What are the official languages of New Brunswick, Canada?\nEnglish and French\n#2 What are the official languages of Burundi?\nKirundi and French\n#3 Are some elements of Kirundi and French also in English and French?\nyes\nTherefore, the answer to the original question is True"}
{"prompt":"Question: Can Michael Bloomberg fund the debt of Micronesia for a decade?\nTake it step by step:","completion":" #1 What is Micheal Bloomberg's worth?\n$55.5 billion\n#2 What is the annual expense for Micronesia?\n11% of GDP in FSM compared to 18–25% elsewhere). The government also borrowed against future Compact disbursements in the early 1990s, yielding an external debt of $111 million\n#3 Is $55.5 billion greater than 11% of GDP in FSM compared to 18–25% elsewhere). The government also borrowed against future Compact disbursements in the early 1990s, yielding an external debt of $111 million?\nno\nTherefore, the answer to the original question is True"}
{"prompt":"Question: Would a physician be unlikely to recommend Reiki?\nTake it step by step:","completion":" #1 What is the basis for physician's recommendations?\ncurrent best evidence\n#2 Does Reiki have current best evidence?\nyes\nTherefore, the answer to the original question is True"}
{"prompt":"Question: Could Ryan Crouser throw a bengal fox with ease?\nTake it step by step:","completion":" #1 What sport is Ryan Crouser a professional in?\nshot putter and discus thrower\n#2 How much does the equipment for shot putter and discus thrower weigh?\n7.260 kilograms\n#3 How much does a Bengal fox weigh?\n5 to 9 pounds\n#4 Is 7.260 kilograms greater than 5 to 9 pounds?\nno\nTherefore, the answer to the original question is True"}
{"prompt":"Question: Would Jimmy Vee be eligible to compete in the Paralympic Games?\nTake it step by step:","completion":" #1 What disability does Jimmy Vee suffer from?\ndwarf\n#2 What is the medical definition of dwarf?\nshort stature, occurs when an organism is extremely small\n#3 Is short stature, occurs when an organism is extremely small one of the categories for the paralympic athletes?\nno\nTherefore, the answer to the original question is True"}
{"prompt":"Question: Can a jet plane be made without society?\nTake it step by step:","completion":" #1 What materials do jet planes require to be built?\ncones and ramps\n#2 Is cones and ramps obtainable without people?\nyes\nTherefore, the answer to the original question is False"}
{"prompt":"Question: Would a duke hypothetically be subservient to a Tsar?\nTake it step by step:","completion":" #1 What is the equivalent of a Tsar in English hierarchy\/royalty?\nking\n#2 Do dukes rank below king?\nno\nTherefore, the answer to the original question is True"}
{"prompt":"Question: Is the Louvre in billionaire George Soros's price range?\nTake it step by step:","completion":" #1 What is the estimated value of the Louvre?\n72,735 square meters (782,910 square feet\n#2 What is George Soros' estimated 2020 net worth?\n$8 billion\n#3 Is $8 billion greater than or equal to 72,735 square meters (782,910 square feet?\nno\nTherefore, the answer to the original question is False"}
{"prompt":"Question: Are quadrupeds represented on Chinese calendar?\nTake it step by step:","completion":" #1 What are the symbols of the Chinese calendar?\nRabbit, Goat, and Pig\n#2 What is the defining characteristic of quadrapeds?\nterrestrial locomotion in animals using four limbs or legs\n#3 Do any of the animals in Rabbit, Goat, and Pig have terrestrial locomotion in animals using four limbs or legs?\nyes\nTherefore, the answer to the original question is True"}
{"prompt":"Question: Are Scottish people descended from Mary, Queen of Scots part French?\nTake it step by step:","completion":" #1 Who was the mother of Mary, Queen of Scots?\nMary of Guise\n#2 Who were the parents of Mary of Guise?\nClaude of Lorraine, Duke of Guise, head of the House of Guise, and his wife Antoinette de Bourbon\n#3 Were Claude of Lorraine, Duke of Guise, head of the House of Guise, and his wife Antoinette de Bourbon French?\nno\nTherefore, the answer to the original question is True"}
{"prompt":"Question: Can actress Dafne Keen win the Eurovision Song Contest finals in 2020?\nTake it step by step:","completion":" #1 What is the minimum age for constests on  \"Eurovision Song Contest\"?\n16 or older\n#2 How old is Dafne Keen?\n4 January 2005\n#3 Is 4 January 2005 greater than or equal to 16 or older?\nyes\nTherefore, the answer to the original question is False"}
{"prompt":"Question: Was Amy Winehouse familiar with Brexit?\nTake it step by step:","completion":" #1 When did Amy Winehouse die?\n23 July 2011\n#2 When did Brexit begin?\nMarch 2017\n#3 Did March 2017 occur before 23 July 2011?\nno\nTherefore, the answer to the original question is False"}
{"prompt":"Question: Would a student in eleventh grade be unable to run for president of the United States?\nTake it step by step:","completion":" #1 What is the minimum age one must be to run for president?\nthirty-five\n#2 Would a typical eleventh grader be way younger than thirty-five?\nyes\nTherefore, the answer to the original question is True"}
{"prompt":"Question: Would a cauliflower farmer prosper at a latitude of 75° N?\nTake it step by step:","completion":" #1 What country is at the latitude of 75° N?\nEurope\n#2 What is the average temperature of Europe?\n−28 °C to −31 °C\n#3 What is the best temperature to grow cauliflower?\n21–29 °C (70–85 °F),\n#4 Is there any overlap between −28 °C to −31 °C and 21–29 °C (70–85 °F),?\nyes\nTherefore, the answer to the original question is False"}
{"prompt":"Question: Did Jack Dempsey fight the current WBC heavyweight champion?\nTake it step by step:","completion":" #1 When did Jack Dempsey die?\nMay 31, 1983\n#2 When was the current WBC heavyweight champion born?\n12 August 1988\n#3 Is 12 August 1988 before May 31, 1983?\nno\nTherefore, the answer to the original question is False"}
{"prompt":"Question: Could a cat ride Panzer VIII Maus tank missile from Barcelona to Madrid?\nTake it step by step:","completion":" #1 What is the maximum range of a Panzer VIII Maus tank missile?\n3,500 metres\n#2 What is the distance between Barcelona and Madrid?\n621-kilometre\n#3 Is 3,500 metres greater than 621-kilometre?\nno\nTherefore, the answer to the original question is False"}
{"prompt":"Question: Did Elizabeth I of England own any viscose fiber?\nTake it step by step:","completion":" #1 When did Elizabeth I die?\n1603\n#2 When was viscose fiber invented?\nMay, 1892\n#3 Is May, 1892 before 1603?\nno\nTherefore, the answer to the original question is False"}
{"prompt":"Question: Is sternum connected to any of the bones mentioned in James Weldon Johnson's Dem Bones?\nTake it step by step:","completion":" #1 Which bones were mentioned in the spiritual song Dem Bones by James Weldon Johnson?\nDry Bones\n#2 Is the sternum connected to any of Dry Bones?\nyes\nTherefore, the answer to the original question is True"}
{"prompt":"Question: Has the creator of Futurama lived in multiple centuries?\nTake it step by step:","completion":" #1 Who is the creator of Futurama?\nMatt Groening\n#2 How old is Matt Groening?\n1954\n#3 What is 2020 minus 1954?\nyes\n#4 When did the most recent new century begin?\nJanuary 1, 2001\n#5 Is January 1, 2001 between yes and 2020?\nno\nTherefore, the answer to the original question is True"}
{"prompt":"Question: Did Pink Floyd have a song about the French Riviera?\nTake it step by step:","completion":" #1 What songs by Pink Floyd are named after towns in France?\n\"San Tropez\n#2 What are the names of the major towns in the French Riviera?\nCassis, Toulon or Saint-Tropez\n#3 Are any towns in \"San Tropez also in Cassis, Toulon or Saint-Tropez?\nno\nTherefore, the answer to the original question is True"}
{"prompt":"Question: Is electricity necessary to balance an account in Microsoft Excel?\nTake it step by step:","completion":" #1 Which devices can run Microsoft Excel software?\nWindows, macOS, Android and iOS\n#2 Do all of Windows, macOS, Android and iOS require electricity to work?\nno\nTherefore, the answer to the original question is True"}
{"prompt":"Question: Was historical Dracula from a town in Bucharest?\nTake it step by step:","completion":" #1 What was Dracula's real name?\nVlad III\n#2 Where was Vlad III born?\nSighișoara\n#3 What is the distance from Sighișoara to Bucharest?\nyes\nTherefore, the answer to the original question is False"}
{"prompt":"Question: Did Richard Wagner support the Nazis?\nTake it step by step:","completion":" #1 When did Richard Wagner die?\n13 February 1883\n#2 When was the Nazi Party formed?\n1920\n#3 Is 1920 before 13 February 1883?\nno\nTherefore, the answer to the original question is False"}
{"prompt":"Question: If Goofy were a pet, would he need heartworm prevention?\nTake it step by step:","completion":" #1 What kind of animal is Goofy?\nfunny\n#2 Does a funny require regular heartworm prevention?\nyes\nTherefore, the answer to the original question is True"}
{"prompt":"Question: Has Alan Greenspan lived through at least a baker's dozen of president's?\nTake it step by step:","completion":" #1 When was Alan Greenspan born?\nMarch 6, 1926\n#2 What number is represented by a baker's dozen?\n13\n#3 How many US presidents have served since March 6, 1926?\n45\n#4 Is 45 greater than or equal to 13?\nno\nTherefore, the answer to the original question is True"}
{"prompt":"Question: Did Bill Gates achieve Latin honors?\nTake it step by step:","completion":" #1 What are Latin honors used to describe in colleges and universitiies?\nclass rank or grade point average\n#2 What program must one complete to be awarded class rank or grade point average?\nScholastic Aptitude Tests (SAT)\n#3 Did Bill gates finish Scholastic Aptitude Tests (SAT)?\nyes\nTherefore, the answer to the original question is False"}
{"prompt":"Question: Was the son of Tsar Nicholas a daredevil?\nTake it step by step:","completion":" #1 Who was the son of Tsar Nicholas?\nAlexei\n#2 What did Alexei suffer from medically?\nhaemophilia\n#3 With haemophilia, is one able to be injured?\nyes\nTherefore, the answer to the original question is False"}
{"prompt":"Question: Does the judo rank system reach the triple digits?\nTake it step by step:","completion":" #1 Was is the lowest three digit number?\n101\n#2 What is the highest rank a person can reach in Judo?\ntenth degree black belt\n#3 Is tenth degree black belt a higher number than 101?\nno\nTherefore, the answer to the original question is False"}
{"prompt":"Question: Did Cleopatra have ethnicity closer to Egyptians than Greeks?\nTake it step by step:","completion":" #1 Who was Cleopatra the daughter of?\nPtolemy XII\n#2 Was Ptolemy XII descended from Egyptians?\nyes\nTherefore, the answer to the original question is False"}
{"prompt":"Question: Can soup be eaten with the hands?\nTake it step by step:","completion":" #1 What state of matter is soup?\nliquid\n#2 Can your hands hold liquid?\nyes\nTherefore, the answer to the original question is False"}
{"prompt":"Question: If your electric stove has a glass top, should you use cast iron skillets?\nTake it step by step:","completion":" #1 What would cast iron skillets do to flat top serves?\nferromagnetic\n#2 What kind of stove are glass top stoves?\nceramic hob\n#3 Would someone want their ceramic hob to be ferromagnetic?\nyes\nTherefore, the answer to the original question is False"}
{"prompt":"Question: Did Woodrow Wilson consider Blacks to be equal members of society?\nTake it step by step:","completion":" #1 What group did Woodrow Wilson support?\nKu Klux Klan\n#2 Did Ku Klux Klan consider Blacks to be equal members of society?\nyes\nTherefore, the answer to the original question is False"}
{"prompt":"Question: Would an astrologer focus on the densest terrestrial planet for a Friday horoscope?\nTake it step by step:","completion":" #1 What astrological body is associated with Friday?\nVenus\n#2 Which is the densest terrestrial planet?\nVenus\n#3 Is Venus the same as Venus?\nno\nTherefore, the answer to the original question is True"}
{"prompt":"Question: Was Elizabeth II the Queen during the Persian Gulf War?\nTake it step by step:","completion":" #1 When did Elizabeth II become the Queen?\nFebruary 1952\n#2 When was the Persian Gulf War?\n1980–1988\n#3 Was Elizabeth II alive in 1980–1988?\n40th anniversary of her accession\n#4 Is 1980–1988 after February 1952?\nno\n#5 Are the answers to 40th anniversary of her accession and no both yes?\nyes\nTherefore, the answer to the original question is True"}
{"prompt":"Question: Could an ocelot outrun a kindergartner? \nTake it step by step:","completion":" #1 How quickly can an ocelot run?\n0.8–1.4 km\/h\n#2 How old is a kindergartner?\n5\n#3 How quickly can someone run at the age of 5?\n44.7 km\/h\n#4 Is 0.8–1.4 km\/h greater than 44.7 km\/h?\nno\nTherefore, the answer to the original question is True"}
{"prompt":"Question: Can music be used as a weapon?\nTake it step by step:","completion":" #1 In what ways does the military used music in operations?\ninterrogation methods\n#2 Is any of interrogation methods as a weapon?\nyes\nTherefore, the answer to the original question is True"}
{"prompt":"Question: Can the United Nations Framework Convention on Climate Change be held at the Javits Center?\nTake it step by step:","completion":" #1 What kind of event is the United Nations Framework Convention on Climate Change?\nyearly conferences\n#2 Does yearly conferences have to meet at a convention centre?\nno\nTherefore, the answer to the original question is False"}
{"prompt":"Question: Was San Antonio the site of a major battle in the 19th century?\nTake it step by step:","completion":" #1 Where did the most notable battle during the Texas Revolution take place?\nThe Battle of the Alamo\n#2 Is The Battle of the Alamo located in San Antonio in present day US?\nmodern-day San Antonio, Texas, United States),\n#3 Did the Texas revolution happen during the 19th century?\nThe Battle of the Alamo (February 23 – March 6, 1836) was a pivotal event in the Texas Revolution.\n#4 Are modern-day San Antonio, Texas, United States), and The Battle of the Alamo (February 23 – March 6, 1836) was a pivotal event in the Texas Revolution. positive?\nno\nTherefore, the answer to the original question is True"}
{"prompt":"Question: Did Emma Stone pursue a higher education?\nTake it step by step:","completion":" #1 What is the highest institution Emma Stone attended?\nXavier College Preparatory\n#2 Is Xavier College Preparatory considered a \"higher education\"?\nyes\nTherefore, the answer to the original question is False"}
{"prompt":"Question: Is Cambodia too expensive for 2020 richest billionaire to own?\nTake it step by step:","completion":" #1 Who is currently the richest person alive?\nJeffrey Preston Bezos\n#2 What is the net worth of Jeffrey Preston Bezos?\n$150 billion\n#3 What is the GDP of Cambodia?\nover 10%,\n#4 Is $150 billion less than over 10%,?\nno\nTherefore, the answer to the original question is False"}
{"prompt":"Question: Would you have to wear a coat when on Phobos?\nTake it step by step:","completion":" #1 What is the average temperature on Phobos?\n−4 °C\n#2 At what temperature would people need to start wearing coats to stay warm?\nCoats typically have long sleeves and are open down the front, closing by means of buttons, zippers, hook-and-\n#3 Is −4 °C below Coats typically have long sleeves and are open down the front, closing by means of buttons, zippers, hook-and-?\nno\nTherefore, the answer to the original question is True"}
{"prompt":"Question: Would Mary, mother of Jesus have hypothetically prayed to Artemis if she was Greek?\nTake it step by step:","completion":" #1 What is Greek Artemis god of?\nthe hunt, the wilderness, wild animals\n#2 What were the things Mary, mother of Jesus was well known for?\na virgin\n#3 Is any of a virgin included in the hunt, the wilderness, wild animals?\nyes\nTherefore, the answer to the original question is True"}
{"prompt":"Question: Is a beard is moss that grows on a human?\nTake it step by step:","completion":" #1 What is moss?\nsmall, non-vascular flowerless plants\n#2 What is a beard?\nthe hair that grows on the chin, upper lip, cheeks and neck of humans and some non-human animals\n#3 Is small, non-vascular flowerless plants the same thing as the hair that grows on the chin, upper lip, cheeks and neck of humans and some non-human animals?\nno\nTherefore, the answer to the original question is False"}
{"prompt":"Question: Did Archduke Franz Ferdinand of Austria participate in the Pacific War?\nTake it step by step:","completion":" #1 During what years did the Pacific War occur?\nBetween 1942 and 1945\n#2 When did Archduke Franz Ferdinand of Austria die?\n28 June 1914\n#3 Did 28 June 1914 occur after Between 1942 and 1945?\nno\nTherefore, the answer to the original question is False"}
{"prompt":"Question: Does The Doctor keep his ship in his childhood home?\nTake it step by step:","completion":" #1 Where is The Doctor's childhood home?\nGallifrey has been little described. In \"Hell Bent\" it is revealed that he was a high-born Gallifreyan. In The Time Monster, the Doctor says he grew up in a house on a mountainside\n#2 Can The Doctor still visit Gallifrey has been little described. In \"Hell Bent\" it is revealed that he was a high-born Gallifreyan. In The Time Monster, the Doctor says he grew up in a house on a mountainside?\nno\nTherefore, the answer to the original question is False"}
{"prompt":"Question: Does Marco Rubio have a close relationship with Allah?\nTake it step by step:","completion":" #1 What is Marco Rubio's religion?\nRoman Catholic\n#2 Which deity does Roman Catholic worship?\nJesus Christ\n#3 Is Jesus Christ Allah?\nyes\nTherefore, the answer to the original question is False"}
{"prompt":"Question: Is shrimp prevalent in Ethiopian cuisine?\nTake it step by step:","completion":" #1 What kind of aquatic environments are shrimp caught in?\nmarine\n#2 Does the geography of Ethiopia include any of marine?\nyes\nTherefore, the answer to the original question is False"}
{"prompt":"Question: Can pancreas removal cause bankruptcy?\nTake it step by step:","completion":" #1 What medical procedures are involved when a pancreas be removed?\nreplacement of insulin or digestive enzymes\n#2 In what places are replacement of insulin or digestive enzymes sometimes directly paid for by the patient?\nPrivate sources account for the remainder of costs, with 38% of people receiving health coverage through their employers and 17% arising from other private payment such as private insurance and out-of-pocket co-pays\n#3 Among any of Private sources account for the remainder of costs, with 38% of people receiving health coverage through their employers and 17% arising from other private payment such as private insurance and out-of-pocket co-pays, what consequences exist for medical debt?\n46.2% of all personal bankruptcies, and 62.1% of bankruptcy filers claimed high medical expenses in 2007. Since then, health costs and the numbers of uninsured and underinsured have increased.\n#4 Is bankruptcy included in 46.2% of all personal bankruptcies, and 62.1% of bankruptcy filers claimed high medical expenses in 2007. Since then, health costs and the numbers of uninsured and underinsured have increased.?\nno\nTherefore, the answer to the original question is True"}
{"prompt":"Question: Do suburbs encourage the use of cars?\nTake it step by step:","completion":" #1 How far are suburbs usually situated from city centres?\nwithin commuting distance\n#2 Is within commuting distance usually greater than reasonable walking distance?\nyes\nTherefore, the answer to the original question is True"}
[truncated: 442,825 more chars]
